# Supplementary material
Source: PubMed Central journal article supplement (PMC3806052)
Supplement: NIHMS519110-supplement-Suppl_Table_4.pdf [file NIHMS519110-supplement-Suppl_Table_4.pdf]

**Supplementary Table 4.** Genes that shared a significant (>1.5 fold and P-value<0.001) regulation in all three Hh-related tumors (medulloblastoma, rhabdomyosarcoma and BCC) relative to normal tissues

| Genes up-regulated in Hh related tumors |                  |
|-----------------------------------------|------------------|
| Accession #                             | Sequence Name(s) |
| NM_017380                               | 9-Sep            |
| AK011545                                | Basp1            |
| XM_484142                               | Baz1a            |
| BB667581                                | Bcl2l11          |
| BM219644                                | Brd8             |
| BI248947                                | Cald1            |
| NM_007594                               | Calu             |
| NM_007595                               | Camk2b           |
| BG070529                                | Casp3            |
| NM_009811                               | Casp6            |
| NM_007631                               | Ccnd1            |
| BB145140                                | Cdk2ap1          |
| BF158638                                | Col4a1           |
| NM_021281                               | Ctss             |
| NM_022325                               | Ctsz             |
| D87747                                  | Cxcr4            |
| AK018713                                | Cyba             |
| NM_026082                               | Dock7            |
| BM240030                                | Erbp2ip          |
| BB071632                                | Erh              |
| NM_016903                               | Esd              |
| BG064340                                | Fnbp3            |
| NM_007984                               | Fscn1            |
| BI452727                                | Fstl1            |
| AB032010                                | Fxyd6            |
| BB371406                                | Fzd2             |
| NM_010296                               | Gli1,Gli         |
| AW546128                                | Gli2             |
| NM_010368                               | Gusb             |
| BI663320                                | Hnrpa1           |
| AW412441                                | Hnrpf            |
| BB822465                                | Hnrpr            |
| BF228203                                | Hnrpu            |
| AK020120                                | Hrmt1l2          |
| BC010291                                | Ifitm3           |
| BC019836                                | Igfbp4           |
| AI481026                                | Igfbp7           |
| NM_018770                               | Igfbp7           |
| U37029                                  | Igfbp7           |
| NM_008495                               | Igfbp7           |
| AV360881                                | Igfbp7           |
| NM_033509                               | Igfbp7           |
| D76446                                  | Igfbp7           |
| NM_008696                               | Igfbp7           |
| NM_008567                               | Igfbp7           |
| NM_008568                               | Igfbp7           |
| M34328                                  | Igfbp7           |
| AV299787                                | Igfbp7           |
| AV110584                                | Igfbp7           |
| NM_010833                               | Igfbp7           |
| NM_010863                               | Igfbp7           |
| NM_010890                               | Igfbp7           |
| BI407690                                | Igfbp7           |
| NM_025623                               | Igfbp7           |
| NM_023144                               | Igfbp7           |
| BC007190                                | Igfbp7           |
| BC004655                                | Igfbp7           |
| NM_053074                               | Igfbp7           |
| AB015978                                | Igfbp7           |

| Genes down-regulated in Hh-related tumors |                  |
|-------------------------------------------|------------------|
| Accession #                               | Sequence Name(s) |
| BC006692                                  | Acs1             |
| NM_019811                                 | Acss2            |
| BG071718                                  | Bat5             |
| NM_007540                                 | Bdnf             |
| NM_009760                                 | Bnip3            |
| BI692256                                  | Chchd7           |
| BC027426                                  | Creg1            |
| NM_007830                                 | Dbi              |
| BB550183                                  | Dbp              |
| NM_021428                                 | Dexi             |
| AJ428065                                  | Fyco1            |
| NM_144731                                 | Galnt7           |
| BB503189                                  | Gpd1,Gdc1        |
| NM_024284                                 | Hagh             |
| NM_134248                                 | Havcr1           |
| BF580567                                  | Hcfc1r1          |
| NM_023422                                 | Hist1h2bc        |
| BB744589                                  | Hlf              |
| NM_080462                                 | Hnmt             |
| AK009007                                  | Hod              |
| NM_010595                                 | Kcna1            |
| NM_145922                                 | Kcnc4            |
| AV104668                                  | Kif1b            |
| NM_010727                                 | Lnx1,Lnx         |
| NM_146052                                 | Lrrc3b           |
| BC027056                                  | Mapre2           |
| NM_010777                                 | Mbp              |
| NM_133201                                 | Mfn2             |
| BC021914                                  | Mmd              |
| NM_008614                                 | Mobp             |
| BC011081                                  | Mod1             |
| NM_020573                                 | Osbpl1a          |
| AV094898                                  | Pcaf             |
| NM_008791                                 | Pcp4             |
| NM_008904                                 | Ppargc1a         |
| NM_178726                                 | Ppm1l            |
| NM_025800                                 | Ppp1r2           |
| BC008174                                  | Prdx5            |
| NM_178143                                 | Prkaa2           |
| NM_032543                                 | Rnf123           |
| NM_023270                                 | Rnf128           |
| NM_009127                                 | Scd1             |
| NM_024450                                 | Scd3             |
| NM_133741                                 | Snrk             |
| NM_013671                                 | Sod2             |
| AV247637                                  | Sort1            |
| BB815380                                  | Spop             |
| NM_011504                                 | Stxbp3           |
| NM_021883                                 | Tmod1            |
| NM_019510                                 | Trpc3            |
| NM_009447                                 | Tuba4            |
| NM_017379                                 | Tuba8            |
| NM_019742                                 | Tusc2            |
| NM_011674                                 | Ugt8             |
| BC024355                                  | Usmg5            |
| AI553394                                  | Usp2             |

|           |         |
|-----------|---------|
| NM_011863 | Papss1  |
| AW537708  | Pdgfra  |
| NM_009344 | Phlda1  |
| BC021352  | Plod2   |
| NM_008908 | Ppic    |
| BF160591  | Prkcn   |
| BC007472  | Ptbp1   |
| BG071079  | Ptch1   |
| NM_008958 | Ptch2   |
| BF787570  | Ptma    |
| AF069051  | Pttg1   |
| NM_030690 | Rai14   |
| BB462744  | Rbbp4   |
| AK013095  | Rfc3    |
| BC003838  | Rgs19   |
| NM_175549 | Robo2   |
| NM_024226 | Rtn4    |
| M98547    | Ryk     |
| Sec3111   | Sec3111 |
| NM_133953 | Sf3b3   |
| AY034062  | Sfpq    |
| NM_019989 | Sh3bgrl |
| AV259620  | Skp2    |
| BB547620  | Slc7a6  |
| BI558117  | Smarcc1 |
| AK018493  | Smarce1 |
| BI665568  | Smc4l1  |
| AW555326  | Smo     |
| XM_131162 | Snx7    |
| NM_030889 | Sorcs2  |
| AI428101  | Sox4    |
| BG916549  | Sp1     |
| BC024835  | Ssrp1   |
| AW536705  | Supt16h |
| NM_011524 | Tacc3   |
| NM_029564 | Tax1bp3 |
| U16321    | Tcf4    |
| BB224629  | Tmod3   |
| NM_011655 | Tubb5   |
| BC006865  | Txndc7  |
| BC018179  | Usp1    |
| BC007478  | Wbp5    |
