# Supplementary material
Source: PubMed Central journal article supplement (PMC3806052)
Supplement: NIHMS519110-supplement-Suppl_Tables_1-3.pdf [file NIHMS519110-supplement-Suppl_Tables_1-3.pdf]

**Supplementary Table 1** Genes up- and down- regulated in RMS (>1.5 fold and P-value < 0.001)

| <b>2851 genes up-regulated in rhabdomyosarcoma (&gt;1.5 fold and P-value &lt; 0.001)</b> |                                                           |                |                    |
|------------------------------------------------------------------------------------------|-----------------------------------------------------------|----------------|--------------------|
| <b>Accession #</b>                                                                       | <b>Sequence Name(s)</b>                                   | <b>P-value</b> | <b>Fold Change</b> |
| AV168216                                                                                 | Zzz3,R75514,AA408566,AW556059,3110065C23Rik               | 1.88E-07       | 2.43009            |
| BB379602                                                                                 | Zzef1,C85424,BC051585,MGC107545,mKIAA0399,                | 0.00009        | 2.30216            |
| BB759260                                                                                 | Zyx,R75157,9530098H06Rik                                  | 3.93E-07       | 6.8602             |
| BC013559                                                                                 | Zwint,Zwint-1,D10ErtD749e,2010007E07Rik,2600001N01Rik     | 4.02E-06       | 4.33115            |
| BB420529                                                                                 | Zswim6,mKIAA1577,2900036G02Rik                            | 1.28E-43       | 5.81057            |
| BG072903                                                                                 | Zranb1,Gm1956,Trabid,D7Wsu87e,9330160G10Rik               | 0.00095        | 1.60955            |
| NM_011769                                                                                | Zim1                                                      | 0.00009        | 3.83185            |
| BB361162                                                                                 | Zic1,ZIC,ZNF201                                           | 1.83E-25       | 14.45411           |
| NM_011764                                                                                | Zfp90,NK10,Zfp64,Zfp83,KRAB17,mKIAA1954,6430515L01Rik     | 4.88E-07       | 3.30762            |
| BM230481                                                                                 | Zfp82,mszf3,KRAB16,A030010D05                             | 4.62E-10       | 3.57192            |
| BC021921                                                                                 | Zfp709,HIT-40,BC021921,MGC28841                           | 0.00019        | 1.85074            |
| BB040500                                                                                 | Zfp647,Es492,6030449J21                                   | 7.06E-07       | 2.21975            |
| NM_009564                                                                                | Zfp64                                                     | 0.00085        | 2.48661            |
| AW548399                                                                                 | Zfp617,Zfps11-6                                           | 0.00091        | 2.17308            |
| AV274175                                                                                 | Zfp608,MGC116601,4932417D18Rik                            | 5.52E-07       | 2.78491            |
| BE985246                                                                                 | Zfp59,Mfg2,Mfg-2                                          | 4.62E-06       | 1.6049             |
| BM207314                                                                                 | Zfp568,C80731,Gm1691                                      | 0              | 4.817              |
| BB150458                                                                                 | Zfp537,Tsh3,KIAA1474,mKIAA1474,A630038G13Rik              | 1.11E-09       | 4.39825            |
| NM_013843                                                                                | Zfp53,KRAZ1,zfas8,Zfp-53,Zfp118,D030067O06Rik             | 8.89E-06       | 2.04926            |
| BM225280                                                                                 | Zfp52,Zfp76,KRAB11,Zfp-52,mszf24,mszf34,zfec29,mszf23-2   | 1.01E-07       | 2.90437            |
| BG064695                                                                                 | Zfp482,ZID,ZBTB6,MGC41441,A830092L04Rik                   | 0.0009         | 1.52711            |
| BC023090                                                                                 | Zfp472,Krim1,KRIM-1,Krim-1A,Krim-1B                       | 0.00018        | 1.82524            |
| BB421061                                                                                 | Zfp451,COASTER,AI596398,                                  | 1.28E-06       | 3.17744            |
| AK012846                                                                                 | Zfp444,FLJ00134,mFLJ00134,2810031J10Rik,6230401O10Rik     | 3.83E-07       | 2.73545            |
| BM227942                                                                                 | Zfp422-rs1,AI842447,Krox-25-2,A430003O12Rik,C430039G02Rik | 0.00076        | 1.80164            |
| AW547438                                                                                 | Zfp407,Gm333,Gm334,Gm948,ZNF407,6430585N13Rik             | 4.33E-07       | 2.63122            |
| NM_009554                                                                                | Zfp37,Tzn,Zfp-37,AV042165                                 | 3.33E-07       | 3.48645            |
| M58566                                                                                   | Zfp3611,Brf1,ERF1,cMG1,Berg36,TIS11b,                     | 2.95E-10       | 2.1344             |
| BQ176698                                                                                 | Zfp369,NRIF2,B930030B22Rik,D230020H11Rik                  | 7.51E-07       | 1.95403            |
| AK014562                                                                                 | Zfp329,ZNF329,2810439M05Rik,4632409L22Rik                 | 0.0001         | 2.37418            |
| NM_018759                                                                                | Zfp326,ZAN75,5730470H14Rik                                | 0.00052        | 1.61594            |
| BG075830                                                                                 | Zfp322a,RP23-9O13.9,9630054P07Rik                         | 4.99E-12       | 1.53642            |
| NM_013889                                                                                | Zfp292,Zn-15,Zn-16                                        | 0.00032        | 1.64396            |
| BE651907                                                                                 | Zfp286,BC027023,MGC39058,RP23-59B16.5                     | 0.00003        | 5.01023            |
| L36316                                                                                   | Zfp260,Ozrf1,Zfp63,AI480997                               | 0.00073        | 1.80779            |
| AV346442                                                                                 | Zfp26,Zfp70,mkr-3,KRAB15,Zfp-26,mszf14,mszf52             | 3.62E-16       | 1.70624            |
| X98096                                                                                   | Zfp148,BERF-1,BFCOL1,ZBP-89,AI480666,AW045217             | 2.69E-08       | 1.8039             |
| BB154236                                                                                 | Zfp142,BB154236,mKIAA0236,9330177B18Rik                   | 1.37E-06       | 2.5965             |
| AV263718                                                                                 | Zfp110,NRIF,Nrif1,N28112,2900024E01Rik                    | 0.00082        | 1.53557            |
| NM_009544                                                                                | Zfp105,AW557864                                           | 1.22E-09       | 2.9553             |
| NM_015753                                                                                | Zfhx1b,SIP1,Zfx1b,Zfxh1b,mKIAA0569,9130203F04Rik          | 3.76E-20       | 3.88171            |
| AV363000                                                                                 | Zfhx1a,BZP,ZEB,MEB1,Nil2,Tcf8,AREB6,Tcf18,Zfhcp,          | 4.15E-08       | 2.86147            |
| NM_133349                                                                                | Zfand2a,Airap,AA407930,AU016206                           | 5.35E-08       | 2.97538            |
| BB271151                                                                                 | Zdhhc24,Leng4,5730496N17Rik                               | 0.00036        | 2.24875            |
| BC019536                                                                                 | Zdhhc20,AI448102,5033406L14Rik,B230110O18Rik              | 2.16E-16       | 4.27936            |
| AV361868                                                                                 | Zdhhc14,New1cp,MGC29194,B530001K09Rik                     | 0.00012        | 2.25267            |
| AK010382                                                                                 | Zdhhc13,HIP3RP,Hip14I,C530010M18,2410004E01Rik            | 1.44E-07       | 2.09971            |
| AV140894                                                                                 | Zcchc3,2810406K24Rik                                      | 0.00087        | 2.45231            |
| BB223737                                                                                 | Zcchc14,BDG29,AA792890,KIAA0579                           | 3.32E-08       | 5.64842            |
| AW556219                                                                                 | Zc3h7a,Zc3h7,HSPC055,Zc3hdc7,AI447294,AW556219,           | 0.00024        | 1.7232             |
| BG922355                                                                                 | Zbtb36,B230208J24Rik                                      | 4.78E-18       | 7.6601             |
| AV027921                                                                                 | Ywhaz,AI596267,AL022924,AU020854,1110013I11Rik            | 9.65E-06       | 3.67075            |
| AV024540                                                                                 | Ywhaq,R74690,AA409740,AU021156,MGC118161                  | 0.00035        | 1.97938            |
| NM_018753                                                                                | Ywhab,14-3-3 beta,1300003C17Rik                           | 0.00013        | 2.04605            |
| BC009080                                                                                 | Yipf1,C030002N13Rik                                       | 3.05E-06       | 1.9655             |
| BG070675                                                                                 | Yap1,Yap,65kDa,YAP65,AI325207                             | 0.00001        | 6.01672            |
| NM_011917                                                                                | Xrn2                                                      | 4.91E-09       | 2.12406            |
| BG064541                                                                                 | Xpo4,mKIAA1721,B430309A01Rik                              | 0.00082        | 1.57655            |
| BC005560                                                                                 | Xlr                                                       | 0.00014        | 2.56382            |
| AV051768                                                                                 | Xbp1,TREB5,XBP-1,TREB-5,D11ErtD39e                        | 5.24E-11       | 1.82847            |
| BC014727                                                                                 | Wwtr1,TAZ,C78399,2310058J06Rik,2610021I22Rik              | 7.93E-06       | 2.88043            |
| AK004087                                                                                 | Wwp2,AIP2,AA690238,AW554328,1300010O06Rik                 | 0.00018        | 5.91992            |

|           |                                                          |          |          |
|-----------|----------------------------------------------------------|----------|----------|
| BE136550  | Wtip                                                     | 3.30E-18 | 3.38288  |
| BM730566  | Wsb2,Swip2,WSB-2,AA673511                                | 3.25E-06 | 3.1205   |
| BC019601  | Wsb1,1110056B13Rik,2700038M07Rik                         | 2.82E-13 | 3.61184  |
| NM_030215 | Wrnip1,WHIP,Wrnip,4833444L21Rik                          | 2.24E-23 | 3.93178  |
| NM_009525 | Wnt5b,Wnt-5b,AW545702                                    | 7.53E-06 | 5.94733  |
| BC018425  | Wnt5a,Wnt-5a,8030457G12Rik                               | 0        | 6.32702  |
| Bl692255  | Wnk1,Prkwnk1,mKIAA0344,6430573H23Rik                     | 3.82E-06 | 1.7165   |
| NM_018865 | Wisp1,Elm1,AW146261                                      | 3.27E-31 | 29.54223 |
| Bl251603  | Wipi1,AW411817,MGC36416,D11Ert498e,4930533H01Rik         | 9.62E-07 | 1.97502  |
| Bl658695  | Whsc1I1,NSD3,AI528490,A530023P05                         | 0.00089  | 3.36446  |
| BQ177743  | Whsc1,Whsc1I,AW555663,mKIAA1090                          | 9.71E-06 | 3.51548  |
| NM_134139 | Wdr74,AA407588,5730436H21Rik                             | 0.00062  | 1.57214  |
| AK002371  | Wdr57,Prp8bp,0610009C03Rik                               | 0.00006  | 1.71756  |
| AI415371  | Wdr19,PWDMP,mKIAA1638,C330027H04Rik,D330023L08Rik        | 0.00005  | 2.71503  |
| AW542545  | Wdr1,D5Wsu185e                                           | 6.78E-06 | 2.19091  |
| NM_024479 | Wbscr27,MGC8159,AW492986,BC002286                        | 0.00064  | 3.08605  |
| BC007478  | Wbp5,AL024233                                            | 4.04E-16 | 2.48701  |
| NM_031877 | Wasf1,Scar,WAVE,WAVE-1,AI195380,AI838537                 | 0.00013  | 2.33276  |
| BM240052  | Vps41,Vam2,mVam2,AI317346                                | 0.00049  | 1.57065  |
| NM_030559 | Vps16,MGC7352,1810074M16Rik                              | 0.00018  | 1.78868  |
| AK003237  | Vkorc1,D7Wsu86e                                          | 0.00028  | 1.81507  |
| M24849    | Vim,MGC102095                                            | 7.03E-35 | 3.33062  |
| BM119387  | Vil2,p81,ezrin,R75297,AW146364,MGC107499,cytovillin      | 4.76E-08 | 3.1633   |
| NM_009502 | Vcl,AA571387,AI462105,AW545629,9430097D22                | 4.53E-07 | 1.6678   |
| BB250384  | Vcam1,CD106,Vcam-1                                       | 4.16E-08 | 4.4065   |
| BB742957  | Uty,Hydb,KIAA4057,mKIAA4057                              | 0        | 36.36382 |
| BB153362  | Utrn,DRP,Dmdl,AA589569                                   | 0.00003  | 8.13706  |
| AW107303  | Usp9x,Faf1,Dffrx,FAF-X,AA407302,AA407699,AL022658,       | 8.09E-31 | 2.13824  |
| AB045709  | Usp8,Ubpy,AI574262,AW557536,mKIAA0055                    | 0.00028  | 1.53355  |
| BM233265  | Usp3,AA409661,BC017156,MGC28886                          | 0.00009  | 1.96204  |
| AI427806  | Usp22,AI427806,KIAA1063,MGC91200,mKIAA1063,9330200A01    | 0.00017  | 1.76249  |
| AK006800  | Usp20,Vdu2,AI467231,1700055M05Rik                        | 7.51E-08 | 5.67967  |
| AW539189  | Usp12,Ubh1                                               | 0.00027  | 2.63202  |
| AI117611  | Usp11,MGC6649,KIAA4085,mKIAA4085,6230415D12Rik           | 1.10E-13 | 3.57519  |
| BC018179  | Usp1,MGC25559                                            | 4.70E-07 | 2.34283  |
| NM_009477 | Upp1,Up,Upp,UPase,UdRPase,AI325217                       | 6.14E-36 | 11.01495 |
| BB219662  | Upk1b,UPlb,Upk1,Tspan20,AI413235                         | 3.16E-27 | 20.3888  |
| BM226250  | Unc5c,rcm,Unc5h3,AI047720,6030473H24,B130051O18Rik       | 0.00037  | 6.51702  |
| BG065285  | Unc5b,Unc5h2,A630020F16,D10Bwg0792e,6330415E02Rik        | 7.58E-15 | 8.88249  |
| BB464342  | Unc45a,AW538196                                          | 0.00016  | 4.8632   |
| BQ266387  | Uhrf2,Nirf,AI426270,AW214556,2310065A22Rik,D130071B19Rik | 0.00019  | 2.08508  |
| NM_053184 | Ugt2a1                                                   | 0.00024  | 3.36764  |
| NM_009466 | Ugdh,Udpgdh                                              | 6.18E-06 | 2.39509  |
| BM211361  | Ugcgl1,AA589501,AI414429,AI448372,0910001L17Rik          | 1.15E-20 | 2.25635  |
| AA591863  | Ugcg,Ugcgl,C80537,Epcs21,GlcT-1,AU043821                 | 2.62E-09 | 6.95918  |
| NM_026435 | Ufm1,AI132708,AI463323,1810045K17Rik                     | 0.00012  | 2.30698  |
| AW108044  | Ucp2,Slc25a8                                             | 0.00046  | 1.83128  |
| NM_030724 | Uck2,UK,UMK,Umpk,TSA903,AA407809,AI481316                | 0.00006  | 4.12208  |
| NM_011670 | Uchl1,gad,C88048,PGP9.5,R75593,AW822034                  | 8.56E-38 | 6.9241   |
| BB253461  | Ubx2,KIAA0242,mKIAA0242,1300013G12Rik                    | 1.12E-10 | 6.49582  |
| BC016129  | Ubt1,BC016129,MGC28905                                   | 0.00008  | 4.05438  |
| NM_013699 | Ubp1,Cp2b,NF2d9,LBP-1a,LBP-1b                            | 8.04E-07 | 1.90585  |
| AK016093  | Ube4b,UFD2,UFD2a,Ufd2p,                                  | 0.00043  | 4.89101  |
| BB796558  | Ube2w,6130401J04Rik                                      | 9.19E-40 | 2.88704  |
| BF472749  | Ube2j1,Ncube,Ubc6p,Ncube1,0710008M05Rik,1110030I22Rik    | 0.00001  | 1.80343  |
| BM242612  | Ube2i,UBC9,Ubce9,Mmubc9,Ubce2i,5830467E05Rik             | 6.64E-08 | 3.08933  |
| Bl438002  | Ube1dc1,AW240750,5730525G14Rik                           | 0.0002   | 1.78572  |
| AI482041  | Ubp2I,C77168,Nice-4,                                     | 0.00041  | 4.46128  |
| BG963358  | Uap1I1,5730445F03Rik                                     | 2.53E-07 | 2.50763  |
| AW542140  | U2af1-rs2,35kDa,C77286,5031411E02Rik,A230052C13Rik       | 0.00011  | 2.24527  |
| NM_024187 | U2af1,35kDa,2010107D16Rik                                | 0.00041  | 1.5122   |
| BC020139  | Tyms,TS                                                  | 0.00005  | 3.35804  |
| AK004219  | TxnI5,TRP14,D11Ert498e,4831443O22Rik,RP23-207N15.4       | 0.00003  | 1.58279  |
| NM_025299 | TxnI4,Dim1,U5-15kD,U5-15kDa                              | 0.00002  | 4.28416  |
| NM_025334 | Txn12,ERp19,0610040B21Rik                                | 5.38E-08 | 1.79225  |
| NM_011660 | Txn1,ADF,Txn,AW550880                                    | 4.79E-26 | 1.77416  |

|           |                                                              |          |          |
|-----------|--------------------------------------------------------------|----------|----------|
| BG070463  | Txlna,Txln,AI425952,AW209241,MGC77972,MGC86145,              | 6.81E-07 | 6.66388  |
| BC004850  | Twsg1,Tsg,Twg,AW552143,D17Erd403e,1810013J15Rik              | 3.81E-12 | 4.8169   |
| NM_030254 | Tusc3,N33,MGC6989,AU022242,BC003311                          | 0.00019  | 1.90576  |
| BB667130  | Tulp4,Tusp,1110057P05Rik                                     | 1.70E-20 | 4.77645  |
| BQ178976  | Tubgcp2,1700022B05Rik                                        | 2.62E-06 | 3.82656  |
| NM_026473 | Tubb6,BB220206,2310057H16Rik                                 | 0        | 7.88058  |
| NM_011655 | Tubb5,AA408537,AI596182,M(beta)5,B130022C14Rik               | 6.79E-41 | 5.16786  |
| AA986082  | Tubb2b,2410129E14Rik                                         | 4.04E-14 | 8.24627  |
| BC003475  | Tubb2a,Tubb2,M(beta)2                                        | 2.68E-15 | 4.59273  |
| NM_009448 | Tuba6,M[a]6                                                  | 0.00008  | 2.02814  |
| NM_009446 | Tuba3,M[a]3,AI528779,MGC107295                               | 8.04E-32 | 22.61037 |
| BC008117  | Tuba2,MGC102558,MGC117866,MGC118411                          | 1.11E-19 | 2.83886  |
| NM_011653 | Tuba1,Tuba-1,MGC102097,MGC102098,MGC102099                   | 8.74E-11 | 2.8343   |
| AK016145  | Till5,R75373,AI428864,mKIAA0998,1700048H13Rik                | 2.19E-11 | 10.05176 |
| BB764137  | Till1,AV014541,6330444E16Rik                                 | 0.00001  | 3.52484  |
| BC018513  | Ttl,2410003M22Rik                                            | 2.05E-08 | 2.57546  |
| BB106428  | Ttc9,AI429215,AI853559,1700029M07Rik                         | 0        | 10.59357 |
| BC017523  | Ttc8,BBS8,AV001447,0610012F22Rik                             | 2.35E-07 | 2.62042  |
| BM116591  | Ttc3,TPRD,AA409221,D16lum21,KIAA4119                         | 0.00008  | 2.62045  |
| BM238672  | Ttc14,cl-44,AI662468,AU014779,AW561908,                      | 1.48E-09 | 1.91907  |
| AV332105  | Tspy5,6330530B20,E130308C19Rik                               | 0.0006   | 2.31038  |
| AK020159  | Tspan9,AU018597,6720474K14Rik,9430079M16Rik                  | 4.13E-07 | 3.07294  |
| NM_019656 | Tspan6,T245,Tm4sf,Tm4sf6,TSPAN-6,AI316786                    | 2.41E-21 | 5.47364  |
| NM_019571 | Tspan5,NET-4,Tm4sf9,AU024142,2810455A09Rik,4930505M03Rik     | 0.00025  | 2.81191  |
| NM_053082 | Tspan4,NAG-2,Tm4sf7,Tspan-4,AI325509,AI746565                | 1.47E-07 | 3.15741  |
| AU016382  | Tsc22d1,TSC,Egr5,TSC-22,Tgfb1i4,AA589566,AW105905            | 0        | 2.97769  |
| NM_133901 | Trrap,AI481500                                               | 4.21E-06 | 1.66403  |
| BB360644  | Trps1,AI115454,AI447310,MGC46754,MGC107472,D15Erd586e        | 1.39E-08 | 2.07727  |
| BB377721  | Trpm3,MLSN2,LTRPC3,AU018608,9330180E14,                      | 2.68E-06 | 4.46255  |
| NM_013838 | Trpc6,Trpp6,mtrp6,AV025995,LLHWJM002,LLHWJM003               | 3.15E-12 | 8.89173  |
| BB817939  | Trpc1,Trpp1                                                  | 5.72E-07 | 6.41965  |
| BB309395  | Trpa1,Anktm1                                                 | 0        | 100      |
| AF075434  | Trp63,Ket,p63,Trp63,p73L,TAp63,p51/p63,AI462811,             | 0.00018  | 2.76971  |
| AW495711  | Trp53inp1,SIP,Teap,SIP18,SIP27,Stinp,2700057G22Rik           | 6.79E-10 | 1.86512  |
| AJ414734  | Trp53bp1,53BP1,m53BP1,MGC100303                              | 6.48E-08 | 2.51413  |
| BG069917  | Trove2,Ssa,Ssa2,SS-A/Ro,AI646302,1810007117Rik,A530054J02Rik | 1.99E-13 | 3.89903  |
| AF288606  | Tro,Tnn,Trol,Maged3,Maged3I,AA409408,magphinin               | 0.00011  | 5.91278  |
| AV350958  | Trip4,ASC-1,BB191711,4930558E03Rik                           | 0.00011  | 1.84119  |
| AK010336  | Trip13,D13Erd328e,2410002G23Rik                              | 7.42E-06 | 3.57476  |
| BM238331  | Trip12,Gtl6,AA410158,MGC31615,1110036I07Rik,6720416K24Rik    | 3.79E-06 | 2.68166  |
| BB306866  | Trip11,AI450776,2610511G22Rik,3110031G15Rik,6030460N08Rik    | 0.00004  | 3.14825  |
| BB080177  | Trio,AA408740                                                | 0.00091  | 2.09304  |
| NM_025863 | Trim59,Mrf1,TSBF1,2310035M22Rik,2700022F13Rik                | 7.01E-12 | 14.45266 |
| AV077293  | Trim47,2210023F24Rik                                         | 1.40E-16 | 3.57997  |
| NM_020267 | Trim44,Mc7,Dipb,MGC102054,4930467E23Rik                      | 0.00004  | 5.05396  |
| BM119247  | Trim37,MUL,TEF3                                              | 0.00001  | 2.6683   |
| AA408787  | Trim28,KAP-1,Tif1b,KRIP-1,AA408787,Tif1beta,MGC102100        | 0.00012  | 1.78968  |
| BB466780  | Trim2,narf,KIAA0517,mKIAA0517                                | 9.65E-12 | 4.07     |
| AV237242  | Trib1,Trb1,TRB-1,A530090O15Rik                               | 2.83E-06 | 6.57603  |
| BB091955  | Tram2,MGC25725,C330003D03Rik                                 | 1.32E-15 | 2.96263  |
| BC027120  | Tram1I1,MGC38777,A830091N21Rik                               | 2.47E-06 | 5.94081  |
| AW209055  | Tram1,TRAMP,MGC1174,1810049E02Rik                            | 0.00004  | 2.51293  |
| NM_011633 | Traf5                                                        | 0.00009  | 2.49987  |
| BE986588  | Traf3ip3,T3jam,AI115021,MGC41284,6030423D04Rik               | 0.00005  | 3.08561  |
| U21050    | Traf3,amn,LAP1,CAP-1,CRAF1,T-BAM,CD40bp,AI528849             | 1.76E-06 | 2.68321  |
| BB749262  | Tradd,AA930854,9130005N23Rik                                 | 0.00011  | 2.83871  |
| BE995678  | Tra1,gp96,ERp99,GRP94,Tra-1                                  | 1.20E-06 | 3.00847  |
| NM_016715 | Tpte2,CRLM2,Ly114,Tslpr                                      | 9.44E-13 | 2.2887   |
| BB484264  | Tpp2,TppII                                                   | 0.00058  | 1.76807  |
| NM_016785 | Tpmt                                                         | 0.00047  | 4.83436  |
| BE380713  | Tpm3,Tpm5,Tm5NM,Tpm-5,hTMnm,Trop-5,hTM30nm,                  | 0.00092  | 4.38005  |
| M22479    | Tpm1,Tmpa,Tpm-1,AA986836,alpha-TM                            | 1.19E-14 | 2.44856  |
| BQ177165  | Tpbg,5T4,AW495680                                            | 1.00E-28 | 13.15204 |
| BB203106  | Tparl,pFT27,Tpardl,AV026557                                  | 0.00004  | 1.94246  |
| AK009693  | Tor3a,Adir                                                   | 5.01E-08 | 2.59613  |
| BB223859  | Tor2a                                                        | 8.55E-07 | 1.73818  |

|           |                                                            |          |          |
|-----------|------------------------------------------------------------|----------|----------|
| AJ298841  | Tor1a,DQ2,Dyt1,torsinA,MGC18883                            | 1.07E-06 | 2.23869  |
| BB166592  | Top2b,Top-2,D230016L12Rik                                  | 0.00002  | 1.54102  |
| BM211413  | Top2a,Top-2                                                | 4.54E-07 | 10.61368 |
| AI315031  | Tns3,TEM6,Tens1,tensin3,BC023928,F830010I22Rik             | 4.44E-22 | 2.69028  |
| BI080625  | Tnrc6a,Tnrc6,CAGH26                                        | 0.00004  | 1.56994  |
| BE136147  | Tnrc15,Gigyf2,                                             | 2.93E-07 | 3.44565  |
| BM236809  | Tnpo1,MIP,TRN,IPO2,MIP1,Kpnb2,AU021749,D13Ert688e          | 0.00028  | 1.81715  |
| NM_011619 | Tnnt2,Tnt,cTnT                                             | 0        | 100      |
| NM_011618 | Tnnt1,Tnt,sTnT,AW146156                                    | 1.81E-08 | 4.10606  |
| NM_021467 | Tnni1,Al747285,2700018B22Rik                               | 3.70E-43 | 18.25854 |
| NM_009393 | Tnnc1,tncc,Al874626                                        | 0        | 8.26786  |
| L26349    | Tnfrsf1a,FPF                                               | 7.39E-27 | 2.61552  |
| NM_013869 | Tnfrsf19,TAJ,Troy,TRADE,AL023044,AW123854,Tnfrsf20,        | 0.00049  | 1.84683  |
| NM_013749 | Tnfrsf12a,Fn14,HPIP,C87282,TweakR,TWEAK-R,Al255180         | 0.00012  | 8.44643  |
| AB013898  | Tnfrsf11b,Opg,TR1,OCIF                                     | 1.17E-06 | 7.37299  |
| NM_025566 | Tnfaip8l1,2600017J23Rik                                    | 0.00004  | 3.47796  |
| NM_011607 | Tnc,TN,Hxb,Ten,TN-C,Al528729                               | 1.11E-13 | 16.26481 |
| NM_025284 | Tmsb10,TB10,Ptmb10                                         | 4.59E-14 | 4.14772  |
| AK017725  | Tmod3,UTMOD,U-Tmod                                         | 3.11E-20 | 1.82546  |
| BB325257  | Tmepai,STAG1,N4wbp4,PMEPA1,AW455466,2210418I02Rik          | 2.81E-21 | 9.08937  |
| AK007864  | Tmem86a,Al414959,AW742698,1810054O13Rik                    | 1.16E-08 | 2.05225  |
| BG075363  | Tmem64,Al790744,AV300874,9630015D15Rik                     | 1.65E-15 | 2.15976  |
| BC004013  | Tmem49,Al787464,4930579A11Rik                              | 4.91E-10 | 1.53182  |
| NM_138751 | Tmem47,BCMP1,Tm4sf10,Al115536,3010015F07Rik                | 0        | 5.53142  |
| BB823331  | Tmem41b,                                                   | 0.00001  | 1.53353  |
| NM_019953 | Tmem4,Zsig9,AW229003,D10Bwg1546e,5330432A10Rik             | 4.85E-07 | 1.72669  |
| NM_026239 | Tmem35,Al841526,9030603L14Rik                              | 2.16E-08 | 6.47984  |
| BG068678  | Tmem30b,9130011B11Rik                                      | 5.26E-08 | 6.08753  |
| BC019745  | Tmem2,MGC102198,mKIAA1412,3110012M15Rik                    | 4.43E-11 | 4.69452  |
| BM114154  | Tmeff1,Tr1,M7365,A830033E11                                | 0        | 18.61652 |
| AK018286  | Tmed8,Gm1184,Al447224,6430595O10Rik                        | 0.00082  | 1.61125  |
| AV306753  | Tmed7,TRAM,AU044611,AW545765,3930401E15Rik,5830493P14Rik   | 0.00041  | 1.62929  |
| AV060550  | Tmed10,Tmp21,MGC102351,1110014C03Rik                       | 6.54E-17 | 1.74608  |
| BM114609  | Tmco3,C87304,B230339H12Rik                                 | 0.00056  | 2.36642  |
| BB470329  | Tmcc1,mKIAA0779,3632431M01Rik                              | 0.00001  | 2.41917  |
| BC004840  | Tmc6,EVER1,D11Ert4204e                                     | 0.00002  | 2.33298  |
| BC004752  | Tmbim1,C78899,Tmbib1,                                      | 2.38E-12 | 1.88296  |
| AK009736  | Tm7sf1,C80550,C80741,                                      | 2.62E-07 | 1.9526   |
| BM240385  | Tm6sf1,Al428514,BC023123,MGC25583,C630016D09Rik            | 8.33E-07 | 2.81275  |
| BQ177170  | Tm4sf1,L6,M3s1                                             | 7.30E-06 | 2.40166  |
| AF185285  | Tlr4,Lps,Ly87,Ran/M1,RasI2-8                               | 0.00056  | 2.91394  |
| NM_126166 | Tlr3,Al957183                                              | 0.00003  | 1.92051  |
| NM_011905 | Tlr2,Ly105                                                 | 0.00033  | 3.98745  |
| BI655907  | Tlr13,Gm713,Al666735                                       | 5.67E-08 | 3.5811   |
| AI226757  | Tloc1,HTP1,Dtrp1,SEC62,Al844545,AW545092,3100002M17Rik     | 0        | 1.98588  |
| BI990924  | Tle3,ESG,Grg3a,Grg3b,mKIAA1547,2610103N05Rik               | 2.39E-08 | 3.7955   |
| NM_011599 | Tle1,Grg1,C230057C06Rik                                    | 0.00001  | 2.56651  |
| AK002882  | Tjap1,Pilt,Tjp4,Al415281,AW121008,0610041D19Rik            | 0.00079  | 2.9638   |
| BF168458  | Timp2,Timp-2,D11Bwg1104e                                   | 0.00016  | 1.96186  |
| BC008107  | Timp1,Cigi,Timp,TIMP-1,MGC7143                             | 0        | 36.769   |
| BM228957  | Tiam2,STEF,mKIAA2016,3000002F19Rik                         | 1.40E-45 | 34.89798 |
| AK009502  | Tia1,mTIA-1,Al256674,2310050N03Rik                         | 0.00062  | 3.5412   |
| BB375353  | Thoc2,Tho2,Gm1139,Gm1793,6330441O12Rik,D130005M13Rik       | 0.00009  | 1.86488  |
| BF320755  | Thex1,3'hexo,3110010F15Rik                                 | 0.00085  | 2.33305  |
| NM_011581 | Thbs2,TSP2,Thbs-2                                          | 0.00026  | 1.8332   |
| AI385532  | Thbs1,TSP1,TSP-1,tbsp1,Thbs-1                              | 2.34E-21 | 11.65334 |
| NM_009378 | Thbd,TM,CD141,Al385582                                     | 8.65E-12 | 3.2085   |
| BB162048  | Thap2,Al450385,Al649097,2900040O07Rik,9030625G08Rik        | 4.16E-09 | 2.22702  |
| BB550124  | Tgm2,tTG,G[ajh,tTGas                                       | 2.07E-07 | 2.24039  |
| AK017884  | Tgif2,C80753,C81206,4921501K24,5730599O09Rik               | 0.00051  | 3.68299  |
| NM_009372 | Tgif,AA959811,Al462167                                     | 7.63E-09 | 4.01369  |
| S69114    | Tgfr2,DNIIR,RIDN,AU042018,TbetaRII,TbetaR-II,1110020H15Rik | 1.51E-06 | 11.22956 |
| BB532080  | Tgfb1,68kDa,big-h3,Beta-ig,Al181842,Al747162               | 1.54E-15 | 2.51259  |
| BC014690  | Tgfb3,Tgfb-3,MGC118722                                     | 0.00003  | 2.47047  |
| BB296763  | Tgfb2,Tgfb-2,BB105277,Tgf-beta2                            | 0.0005   | 6.85357  |
| NM_009365 | Tgfb1i1,Hic5,ARA55,TSC-5,hic-5                             | 1.99E-18 | 4.05175  |

|           |                                                             |          |          |
|-----------|-------------------------------------------------------------|----------|----------|
| NM_011577 | Tgfb1,Tgfb,Tgfb-1,TGF-beta1                                 | 1.27E-14 | 7.5851   |
| AF004833  | Tfpi,EPI,LACI,AW552122,A630013F22Rik                        | 5.77E-28 | 8.49407  |
| BB405795  | Tfdp2,DP3,DP-3,A330080J22Rik                                | 4.64E-06 | 2.13143  |
| BC010465  | Tes,TESS,Tes1,Tes2,testin2,D6ErtD352e                       | 1.39E-07 | 3.51     |
| NM_009352 | Terf1,Pin2,Trf1,Trfb1                                       | 2.06E-06 | 2.27191  |
| NM_013689 | Tec                                                         | 0.00016  | 3.33514  |
| D87965    | Tead4,TEF-3,TEAD-4,Tefr1a,ETFR-2a,Tcf13r1                   | 8.47E-14 | 10.44708 |
| AK015351  | Tdrd9,4930441E05Rik                                         | 0.00006  | 5.89309  |
| U07662    | Tcra,TRAV6-7,TRAV6D-7,Tcralpha,N30.7TCRA                    | 1.17E-06 | 13.28127 |
| AV085634  | Tcn2,Tcn-2,AW208754                                         | 1.23E-07 | 1.67875  |
| NM_016921 | Tcirg1,oc,Stv1,Vph1,Atp6i,OPTB1,TIRC7,ATP6a3,OC-116,ATP6N1C | 0.00059  | 1.88485  |
| AV044715  | Tcf15,Figlb,AV260129,MGC118431                              | 2.42E-09 | 5.84834  |
| NM_031198 | Tcfec,TFEC,BB107417,MGC107474                               | 4.73E-06 | 6.14357  |
| D29919    | Tcfe2a,A1,E12,E2A,E47,ME2,ALF2,Pan1,Pan2,TCF3,VDIR          | 8.95E-07 | 8.40599  |
| C88013    | Tcfap2e,AP-2e,AI505200                                      | 0.00052  | 4.91325  |
| AI323642  | Tcf7,Tcf1,TCF-1,AI465550                                    | 0.00006  | 3.70558  |
| AI639846  | Tcf4,ME2,TFE,E2-2,E2.2,ITF2,SEF2,Hnf-4,ITF-2,SEF-2,         | 8.11E-09 | 2.31071  |
| NM_011545 | Tcf21,epc,Pod1,Pod-1,capsulin,epicardin                     | 0        | 50.15693 |
| NM_011544 | Tcf12,HEB,ME1,REB,ALF1,HTF4,HTF-4                           | 2.61E-14 | 3.48274  |
| NM_025703 | Tceal8,3930402F23Rik                                        | 6.99E-09 | 2.233    |
| BB378019  | Tceal7,AI118095,1110018P05Rik                               | 3.83E-06 | 1.93913  |
| AV226212  | Tbx4,3930401C23                                             | 1.41E-14 | 22.17441 |
| BB045423  | Tbx3,D5ErtD189e                                             | 2.13E-08 | 11.37186 |
| AK020409  | Tbx20,Tbx12,AL022859,9430010M06Rik                          | 2.85E-06 | 7.36801  |
| NM_009324 | Tbx2                                                        | 3.15E-11 | 8.48634  |
| AK012980  | Tbx18,2810012F10Rik,2810404D13Rik                           | 0.00017  | 3.47253  |
| AK005604  | Tbpl1,STD,TLF,TRP,Tlp,TRF2,D18347,AW011832,AW491032         | 1.23E-07 | 2.40271  |
| BF682509  | Tbl1x,Tbl1,5330429M20                                       | 7.26E-08 | 1.85353  |
| NM_019786 | Tbk1,AI462036,AW048562,1200008B05Rik                        | 1.71E-06 | 1.67355  |
| BB559082  | Tbca                                                        | 6.36E-06 | 1.55259  |
| BB451404  | Tbc1d8,AD3,VRP,HBLP1                                        | 7.68E-10 | 2.96284  |
| AK004526  | Tbc1d2b,AI480956,AV021536,AV023399,AW491493,                | 9.12E-08 | 1.90399  |
| BF577643  | Tbc1d15,AU022358,AU023730,AW557774,4432405K22Rik            | 1.04E-06 | 1.60565  |
| BF228251  | Tbc1d12,BC033574,MGC38216                                   | 0.00015  | 1.60367  |
| BC008166  | Tax1bp3,TIP-1,1300011C24Rik,RP23-263M10.10                  | 5.09E-17 | 3.4688   |
| NM_031867 | Tas1r1,TR1,T1r1,Gpr70                                       | 0.00001  | 5.19027  |
| BC012873  | Tardbp,C85084,1190002A23Rik                                 | 0.00009  | 1.59241  |
| BB151477  | Taok1,AU020252,MGC29021,mKIAA1361,2810468K05Rik             | 2.20E-06 | 2.92075  |
| AK004560  | Tanc1,Tanc,mKIAA1728,1200003E16Rik                          | 9.00E-10 | 2.04068  |
| AV212626  | Tagln2,Sm22B,Sm22a,KIAA0120,SM22beta,2700094C18Rik          | 2.32E-11 | 3.11741  |
| BB427389  | Taf15,68kDa,Taf2n,TAFII68,2610111C21Rik                     | 0.00033  | 2.81194  |
| NM_011524 | Tacc3,Aint,C86661                                           | 1.29E-06 | 5.34739  |
| BE862546  | Tacc1,AA960202,4833447E04Rik,B230378H13Rik                  | 1.41E-08 | 1.61795  |
| NM_053093 | Tac4,PPT-C,AW489379,tachykinin                              | 7.15E-06 | 2.33318  |
| BB277065  | T2bp,TIFA                                                   | 1.26E-08 | 10.71301 |
| AV336547  | Syt4,SytIV                                                  | 4.68E-13 | 6.36437  |
| BB244585  | Syt13,AI549909,mKIAA1427,5730409J20Rik                      | 1.32E-39 | 37.84267 |
| NM_134164 | Syt12                                                       | 0.00007  | 9.68152  |
| BF457392  | Syt11,1500004A13Rik,3632445O20Rik,5430404N14Rik             | 2.07E-08 | 2.37404  |
| BB322227  | Synpo2l,1110054M18Rik                                       | 6.88E-10 | 1.8373   |
| BB426294  | Synpo,AW046661,9330140I15Rik                                | 1.05E-07 | 3.05298  |
| NM_022027 | Syne1,8B,CPG2,Myne1,SYNE-1,SYNE-1B,BE692247                 | 0.00018  | 2.38608  |
| BB469322  | Syncrip,pp68,Nsap1,Nsap1l,GRY-RBP,2610109K23Rik,            | 1.69E-14 | 2.12865  |
| AK005954  | Syce2,Cesc1,AA407907,1700013H19Rik                          | 0.00015  | 3.26187  |
| BG066534  | Suz12,AI195385,AU016842,AW536442,KIAA0160,mKIAA0160         | 0.00097  | 1.5368   |
| BG793501  | Suv420h1,AA117471,MGC18702,Suv4-20h1,C630029K18Rik          | 0.00024  | 2.16347  |
| BF122782  | Surf4,Surf-4,AL033340,AL033373                              | 1.90E-07 | 1.97302  |
| AW536705  | Supt16h,Cdc68,Spt16,Fact140                                 | 2.09E-27 | 1.82234  |
| BG064647  | Sumo2,Smt3b,SUMO-2,Smt3h2                                   | 0.00004  | 2.66601  |
| BB822050  | Sumf2,2610040F05Rik                                         | 1.27E-08 | 5.4352   |
| BB751459  | Sulf1,AI467640,AW121680,mKIAA1077                           | 1.00E-18 | 5.61566  |
| AU014962  | Stx5a,Stx5,D19ErtD627e,0610031F24Rik                        | 4.58E-07 | 2.06187  |
| BC011491  | Stx4a,Stx4,Syn4                                             | 2.57E-07 | 1.53765  |
| D29800    | Stx3,AA960228,AV006285,AW536415                             | 0.00011  | 3.06865  |
| AK017897  | Stx11,5830405C08Rik                                         | 1.33E-06 | 4.95632  |
| AF414080  | Strn4,ZIN,C80611,zinedin                                    | 0.00006  | 1.63462  |

|           |                                                           |          |          |
|-----------|-----------------------------------------------------------|----------|----------|
| BB485260  | Strn3,Gs2na,SG2NA                                         | 2.02E-06 | 1.70462  |
| BG519214  | Strn,AU022939,D130055P19                                  | 2.03E-07 | 2.48277  |
| AV231210  | Stox2,AI449080,AI835114,MGC107432,mKIAA1392,4933409N07Rik | 7.45E-06 | 3.9692   |
| AK007508  | Stoml1,SLP-1,STORP,WPB72,UNC-24,AI847431,1810015E19Rik    | 0.00088  | 2.3584   |
| AF093620  | Stom,Epb7.2                                               | 0.00002  | 2.15422  |
| BC010581  | Stmn1,19K,Lag,SMN,p18,p19,pig,PP17,PP18,PR22,op18,Lap18   | 0.00007  | 3.02435  |
| BG069810  | Stk4,Mst1,Ysk3,Kas-2,AI447339,AU020804                    | 0.00049  | 1.66055  |
| BB528554  | Stk36,FU,MGC58023,B930045J24,1700112N14Rik                | 0.00019  | 4.46711  |
| AK021111  | Stk3,MST,Mst3,mess1,0610042I06Rik                         | 6.64E-07 | 2.20699  |
| BM232304  | Stk25,Ysk1,C86992,AU018434,Ste20-like,1500019J11Rik       | 0.00004  | 2.08939  |
| AV173139  | Stk17b,Drak2,AI120141,3110009A03Rik                       | 1.09E-30 | 3.65947  |
| AF062076  | Stk16,EDPK,Krct,PKL12                                     | 0.0005   | 2.31587  |
| AK004757  | Stk11ip,LIP1,LKB1IP,BB131189,1200014D22Rik                | 0.00005  | 18.33812 |
| BB817972  | Steap2,STMP,IPCA1,IPCA-1,STAMP1,PCANAP1,                  | 2.02E-15 | 17.25394 |
| AF297098  | Steap1,Steap,Prss24,2410007B19Rik                         | 0.00028  | 4.36687  |
| AK021006  | Stch,AV006182,1600002I10Rik,B230217N24Rik                 | 2.50E-11 | 14.90994 |
| BQ032752  | Stc1,Stc                                                  | 0.00003  | 6.77363  |
| AK004083  | Stat3,Aprf,AW109958,1110034C02Rik                         | 3.55E-11 | 1.82222  |
| BB667840  | Stard13,DLC2,GT650,MGC38133                               | 0.00001  | 2.09944  |
| BB277125  | Stam2,Hbp,BB145015,1200004O12Rik,5730456G07Rik            | 1.38E-08 | 7.69306  |
| NM_011484 | Stam,STAM1                                                | 1.46E-06 | 1.7306   |
| BG071333  | St8sia2,STX,Siat8b,AI323367,ST8Siall                      | 6.03E-06 | 4.65573  |
| AK007601  | St6galnac4,Siat7d,MGC102103                               | 1.13E-08 | 2.7369   |
| BC010208  | St6galnac2,Siat7,Siat7b                                   | 1.02E-15 | 7.76732  |
| AK008100  | St5,2010004M01Rik,2610305K15Rik                           | 1.48E-26 | 8.27423  |
| BE954474  | St3gal4,Siat4c                                            | 0.00002  | 3.92295  |
| NM_009177 | St3gal1,Siat4,Siat4a,ST3Gall,AI467004,MGC90735,St3gal-1   | 6.69E-14 | 2.66838  |
| NM_133726 | St13,HIP,HOP,p48,SNC6,HSPABP,HSPABP1                      | 2.52E-10 | 1.67789  |
| BC024835  | Ssrp1,T160,Hmgox,C81323,Hmg1-rs1,Hmgi-rs3                 | 0.00034  | 1.9837   |
| BC024835  | Ssrp1,T160,Hmgox,C81323,Hmg1-rs1,Hmgi-rs3                 | 2.56E-09 | 1.86538  |
| AV325051  | Ssr1,SSR,TRAPA,AI159733,AI452176,6330400D04,              | 1.55E-06 | 4.48377  |
| BB033597  | Ssfa2,CS1,CS-1,KRAP,SPAG13,mKIAA1927,5730488C15Rik        | 1.41E-25 | 2.02881  |
| AV295012  | Ssbp3,LAST,SSDP1                                          | 0.00007  | 1.5861   |
| AI481332  | Ssbp2,SSDP2,Hspsc116,                                     | 1.73E-13 | 9.82612  |
| AI528781  | Ss18,Syt,Ssxt,D130059H17                                  | 0.00002  | 5.71316  |
| BC028307  | Srpx2,SRP,SRPUL,1110039C07Rik                             | 0        | 15.66056 |
| NM_009272 | Srm,SpdSy,AA407669                                        | 1.99E-07 | 2.07549  |
| AK008404  | Sri,Sor,2210417O06Rik                                     | 0.00006  | 2.02737  |
| AF481964  | Srgap3,Gbi,WRP,MEGAP,AI452337,Arhgap14,mKIAA0411          | 4.63E-23 | 4.11563  |
| AK005172  | Srgap2,FBP2,Fnbp2,srGAP3,AI448945,9930124L22Rik           | 0.00002  | 2.49373  |
| BM123132  | Sreb12,SREBP2,SREBP-2,AI608257,SREBP2gc                   | 0.00003  | 4.32382  |
| BB476639  | Srd5a2l2,MGC130344,MGC130345,D330017N19Rik                | 0.00031  | 3.0798   |
| BB206480  | Srd5a2l,H5ar,AV364670,AW987574,A430076C09,                | 0.00001  | 9.69481  |
| NM_009270 | Sqle,AI323792                                             | 2.24E-11 | 3.54079  |
| BM242524  | Spty2d1,AI852426,5830435K17Rik                            | 0.00001  | 1.66649  |
| BC003227  | Sptlc2,LCB2,AI173915,mKIAA0526                            | 0.00002  | 2.79418  |
| NM_013539 | Spsb2,C9,SSB2,Grcc9,AI461677                              | 0.00004  | 4.16397  |
| AI596360  | Spsb1,SSB1,SSB-1,AI596360,AI854583,MGC102221,             | 0.00029  | 2.12153  |
| BB080456  | Spry4,sprouty4,A030006O18Rik                              | 1.75E-07 | 3.60803  |
| BB529691  | Spry2,sprouty2                                            | 1.73E-07 | 2.23537  |
| BB053442  | Spred2,C79158                                             | 0.00012  | 1.8959   |
| BQ044290  | Spred1,AL024345,AW047647,5730461F13Rik                    | 1.04E-12 | 5.25745  |
| BC023131  | Sppl3,Psl4,Usmg3,MGC90867,4833416I09Rik                   | 0.00017  | 1.82931  |
| NM_009263 | Spp1,OP,Bsp,Eta,Opn,Ric,BNSP,BSPI                         | 0        | 100      |
| AW550681  | Spnb2,elf1,elf3,SPTB2,SPTBN1,Spnb-2                       | 3.74E-10 | 11.28945 |
| AK011566  | Spna2,brain,Spna-2,2610027H02Rik                          | 0.0003   | 1.90182  |
| AU067702  | Spir1,Spir-1,AI415299,AU022898,AW550622,6030430B19Rik     | 7.76E-21 | 6.84093  |
| BM228780  | Spin,AA553322,AA673430,MGC27756                           | 2.75E-13 | 3.06807  |
| NM_025367 | Sphk1,SK1,1110006G24Rik                                   | 0.00082  | 4.81171  |
| BE948928  | Spg3a,FSP1,SPG3,AD-FSP,4930435M24Rik                      | 0.00032  | 3.56058  |
| BB095517  | Spg21,MAST,ACP33,GL010,BM-019,C78576,D9Wsu18e             | 6.57E-24 | 3.30445  |
| BC019390  | Spcs3,1810011E08Rik                                       | 7.27E-22 | 2.16643  |
| BI078449  | Spcs2,AA408713,MGC60452,mKIAA0102,5730406I15Rik           | 2.00E-12 | 1.83728  |
| NM_026911 | Spcs1,1810004F21Rik                                       | 1.55E-16 | 1.69204  |
| BC027121  | Spbc25,2600017H08Rik,2610205L13Rik                        | 0.00001  | 11.55198 |
| BC023432  | Spats2,p59,59kDa,Scr59,2700012F11Rik                      | 4.04E-07 | 5.53509  |

|           |                                                          |          |          |
|-----------|----------------------------------------------------------|----------|----------|
| AV271736  | Spata13,C79050,ESTM11,X83327,FLJ00298,mFLJ00298          | 0.0009   | 3.07544  |
| NM_009242 | Sparc,BM-40,AA517111                                     | 1.23E-06 | 1.86646  |
| AK004607  | Sp3,MGC105187                                            | 0.00049  | 1.81045  |
| BG916549  | Sp1,Sp1-1,AA450830,AI845540,1110003E12Rik                | 0.00014  | 1.79491  |
| BI793804  | Sox9,AV220920,KIAA4243,mKIAA4243,2010306G03Rik           | 0.00026  | 2.55056  |
| AK015212  | Sox5,AI528773,MGC124352                                  | 2.23E-10 | 7.89648  |
| BG083485  | Sox4,Sox-4,AA682046                                      | 1.34E-09 | 3.92115  |
| BM508495  | Sox11,end1,AI836553,1110038H03Rik,6230403H02Rik          | 3.10E-12 | 5.31114  |
| BB212560  | Sost,5430411E23Rik                                       | 7.61E-10 | 9.88194  |
| NM_030889 | Sorcs2,N28137,mKIAA1329                                  | 0.00039  | 5.26413  |
| BB479893  | Sorbs2,Argbp2,mKIAA0777,A530071H08,9430041O17Rik         | 6.40E-10 | 4.30564  |
| BB204648  | Socs6,Cis4,SSI4,Cish4,STAI4,STAT4,Socs4                  | 0.00033  | 2.5088   |
| BB244749  | Socs4,Socs7,AI427843,AU015727,AU015859,3110032M18Rik,    | 2.90E-07 | 1.60471  |
| BB022048  | Socs2,hg,JAB,CIS2,Cish2,SSI-2,SOCS-2,AW108012,           | 0.00003  | 3.48964  |
| BG064396  | Soat1,ald,Acact,ACAT-1,8430426K15Rik                     | 1.86E-17 | 13.36444 |
| AI314167  | Snx8,B130023O14Rik                                       | 1.78E-06 | 2.38271  |
| AK011015  | Snx7,MGC107328,2510028H01Rik                             | 0        | 8.03282  |
| BC025911  | Snx6,C85963,AU018928,2010006G21Rik,2610032J07Rik         | 8.08E-07 | 1.76969  |
| NM_080557 | Snx4,AI037066,1810036H14Rik                              | 1.52E-08 | 1.85494  |
| AV351081  | Snx25,Gm173,Gm1699,SBB131,AI661919                       | 2.36E-11 | 4.74435  |
| AK011015  | Snx7,MGC107328,2510028H01Rik                             | 7.62E-04 | 1.59992  |
| BI646094  | Sntb2,Snt2                                               | 0.00006  | 3.10519  |
| NM_026506 | Snrpg,SMG,2810024K17Rik                                  | 4.48E-16 | 1.7977   |
| AK012171  | Snn,AI848521,AW547286,MGC107297,2810407J07Rik            | 0.00025  | 2.66621  |
| NM_013669 | Snap91,91kDa,AP180,F1-20,mKIAA0656                       | 6.16E-41 | 8.69645  |
| NM_011415 | Snai2,Slug,Slugh                                         | 6.88E-09 | 6.58252  |
| NM_011427 | Snai1,Sna,AI194338                                       | 5.83E-20 | 8.32133  |
| AV344473  | Snag1                                                    | 1.87E-06 | 2.19957  |
| AW538800  | Smyd4,G430029E23Rik,RP23-384C18.3                        | 0.00001  | 3.64432  |
| AW555326  | Smo,bnb,Smoh,D13Mgi8,E130215L21Rik                       | 6.23E-10 | 2.23194  |
| BM244144  | Smc4I1,C79747,2500002A22Rik                              | 4.87E-10 | 3.08418  |
| NM_008017 | Smc2I1,CAPE,CAP-E,Fin16,AI255214,AW545314,5730502P04Rik  | 1.77E-06 | 4.47237  |
| BB156359  | Smc1I1,SMCB,Smc1,SB1.8,KIAA0178,Smc1alpha,mKIAA0178      | 0.00004  | 1.51364  |
| AV061337  | Smbp,Tm9sf3,AI115521,AI413748,AW146116,AW549777,         | 7.19E-21 | 1.94077  |
| AK018493  | Smarce1,Baf27,2810417B20Rik,5830412H02Rik,9030408N19Rik  | 4.83E-08 | 3.96673  |
| BI558117  | Smarcc1,Rsc8,SRG3,BAF155,AI115498                        | 3.14E-08 | 3.45774  |
| BG065193  | Smarcad1,Etl1,D6Pas1,AV081750,AW226546,mKIAA1122         | 0.00017  | 1.55087  |
| BI661719  | Smarca5,Snf2h,4933427E24Rik,D330027N15Rik                | 9.48E-09 | 1.74741  |
| AF010600  | Smarca3,Hlrf,P113,Snf2I3,AF010600,BC057116               | 0.00065  | 2.18524  |
| BM123777  | Smad7,Madh7                                              | 1.46E-08 | 3.9473   |
| AF010133  | Smad6,Madh6                                              | 0        | 8.83985  |
| AV014063  | Smad5,Dwf-C,Madh5,MusMLP,AI451355,1110051M15Rik          | 3.26E-08 | 3.07677  |
| NM_010754 | Smad2,Madh2,Madr2                                        | 4.43E-06 | 1.77849  |
| NM_008539 | Smad1,Mlp1,Madh1,Madr1,MusMLP,AI528653                   | 5.71E-17 | 2.55943  |
| AK008863  | Sln,2310045A07Rik                                        | 1.28E-06 | 5.07441  |
| NM_009289 | Slk,9A2,Etk4,SMAK,Stk2,mSLK,AV021402,AW411554,mKIAA0204  | 5.35E-23 | 4.68528  |
| AV246497  | Slitrk6,Sltk6,4832410J21Rik                              | 2.15E-15 | 8.83774  |
| BB357579  | Slitrk4,6430513G13,D930039I09Rik                         | 6.53E-34 | 15.61319 |
| AK012169  | Slit2,2610528G05Rik                                      | 1.08E-10 | 4.17564  |
| BG963150  | Slit2,Slll3,Drad-1,KIAA4141,mKIAA4141,E030015M03Rik      | 0.00018  | 3.65828  |
| NM_011408 | Slnf2,Shlf2                                              | 5.66E-10 | 3.98819  |
| NM_033314 | Slco2a1,Pgt,mPgt,Slc21a2,2310021C19Rik                   | 2.70E-18 | 4.1545   |
| BB148073  | Slc9a9,AI854429,9930105B05                               | 0.00028  | 5.61643  |
| NM_011405 | Slc7a7,myHat1,AI790233                                   | 4.58E-08 | 2.98043  |
| BB547620  | Slc7a6,LAT3,LAT-2,AI643885                               | 3.76E-10 | 2.51799  |
| BC026131  | Slc7a5,TA1,D0H16S474E                                    | 9.17E-08 | 11.17908 |
| BB264620  | Slc7a1,Atrc1,Rec-1,Rev-1,Atrc-1,mCAT-1,AI447493          | 1.45E-07 | 2.24536  |
| AI648846  | Slc6a6,Taut,C80501,AA589629                              | 8.85E-18 | 2.71482  |
| BB536871  | Slc6a11,GAT4,Gabt4,D930045G19Rik,E130202I16Rik           | 3.57E-17 | 13.55273 |
| AW555750  | Slc4a7,NBC3,NBCn1,C330023F04,E430014N10Rik               | 8.91E-13 | 2.44314  |
| NM_009208 | Slc4a3,Ae3,A930038D23Rik                                 | 0        | 18.6934  |
| NM_009207 | Slc4a2,Ae2,B3RP                                          | 5.92E-06 | 2.70811  |
| BB145101  | Slc44a2,1110028E10Rik                                    | 6.79E-06 | 1.77844  |
| BC025941  | Slc44a1,CTL1,CHTL1,Cdw92,AW547365,4833416H08Rik          | 4.04E-08 | 1.62351  |
| BC026874  | Slc41a2,SLC41A1-L1,A230035L05Rik                         | 0.00001  | 6.65156  |
| AI504711  | Slc40a1,MTP,OI5,Pcm,Dusg,Fpn1,MTP1,IREG1,Slc11a3,Slc39a1 | 8.78E-31 | 8.56032  |

|           |                                                           |          |          |
|-----------|-----------------------------------------------------------|----------|----------|
| NM_008202 | Slc39a7,KE4,Ke-4, Ring5,H-2Ke4,H2-Ke4,AA408174            | 3.74E-08 | 1.73999  |
| BB825002  | Slc39a6,Ermelin                                           | 0.00011  | 4.19832  |
| BB399837  | Slc39a14,fad123,BC021530,MGC38539,G630015O18Rik           | 8.04E-08 | 2.29653  |
| BM239325  | Slc39a10,mKIAA1265,5430433110,2900042E17Rik               | 0.00018  | 3.23124  |
| BF165681  | Slc38a1,NAT2,AA408026,AA409865,AL022800,AU015942          | 8.59E-26 | 19.98647 |
| BB752003  | Slc35f5,Al646727,1300003P13Rik                            | 2.98E-20 | 3.00548  |
| Al642520  | Slc35d1,UGTREL7,Al834976,KIAA0260,mKIAA0260,C330011J09    | 2.06E-06 | 2.18823  |
| AF233322  | Slc30a7,ZnT7,ZnT-7,Znt12,1810059J10Rik                    | 0.00008  | 1.55561  |
| NM_022885 | Slc30a5,ZNT5,ZTL1,ZnT-5,Znt1,AF233321,1810010K08Rik       | 2.26E-06 | 1.57742  |
| NM_011774 | Slc30a4,Im,Znt4                                           | 1.76E-16 | 2.82104  |
| NM_130451 | Slc2a10,Glut10,AA450473                                   | 0.0003   | 5.33056  |
| BI158381  | Slc29a3,Ent3,AW987637,4933435C21Rik                       | 0.00082  | 1.73949  |
| AV292356  | Slc26a7,MGC30955                                          | 9.34E-18 | 15.94784 |
| AA823938  | Slc25a5,Ant2,MGC101927                                    | 2.69E-29 | 2.81355  |
| AK011759  | Slc25a32,Mftc,2610043O12Rik                               | 7.00E-26 | 2.48433  |
| BF578055  | Slc25a24,2610016M12Rik                                    | 6.00E-25 | 8.22449  |
| NM_011398 | Slc25a14,UCP5,BMCP1,UCP5L,UCP5S                           | 0.00001  | 5.25628  |
| BB465699  | Slc20a1,Glv1r1,Glv1r-1,Al607883                           | 4.26E-08 | 5.9475   |
| BB277461  | Slc1a4,SATT,ASCT1,AW045657                                | 2.03E-27 | 16.47314 |
| AW105741  | Slc16a2,Mct8,Xpct,AW105741                                | 0.00004  | 1.93575  |
| NM_023044 | Slc15a3,Ci1,cl-1                                          | 3.84E-08 | 5.13701  |
| BB732135  | Slc12a7,Kcc4,AA408796,D13Ert261e                          | 9.20E-39 | 6.58456  |
| NM_009195 | Slc12a4,KCC1,RBCKCC1,AW546649                             | 6.99E-17 | 3.20225  |
| BC027440  | Slc10a3,P3,DXS253Eh,DXSmhG28,                             | 0.00007  | 2.15096  |
| BB031119  | Slap,Slap,Slap-1                                          | 0.00021  | 4.93248  |
| AV259620  | Skp2,FBXL1,MGC102075,MGC116668                            | 9.69E-09 | 5.0494   |
| BM208991  | Skiv2l2,mKIAA0052,2610528A15Rik                           | 0.00006  | 1.99061  |
| NM_021337 | Skiv2l,SKI,Ddx13,Ski2w,AW214248,4930534J06Rik             | 0.00026  | 3.00517  |
| U36203    | Skil,sno,Skir,SnoN,SnoN2,sno-dE3,9130011J04Rik            | 1.17E-08 | 7.77004  |
| AK019148  | Ski,MGC8300,AA062172,AA589460,BC004088                    | 1.80E-10 | 1.57286  |
| Al662854  | Sirpb1,Sirpb,SIRP-beta,9930027N05Rik                      | 0.00003  | 4.35949  |
| AV228782  | Sipa1l2,BC058408,mKIAA1389                                | 2.15E-11 | 2.37371  |
| AF038848  | Sin3b,2810430C10Rik                                       | 2.68E-11 | 2.76191  |
| NM_015756 | Shrm,AL022960,D5Ert287e                                   | 1.86E-17 | 24.74707 |
| BC026364  | Shoc2,Sur8,Sur-8,AU017287,MGC102442,mKIAA0862             | 0.00059  | 1.99919  |
| NM_011369 | Shcbp1,mPAL                                               | 0.00002  | 5.95952  |
| BI408715  | Shb,BC028832                                              | 0.00073  | 1.60131  |
| BB072090  | Sh3md2,Posh,R75531,2200003J05Rik                          | 3.21E-10 | 6.96045  |
| AK018032  | Sh3kbp1,Ruk,Seta,Al447724,1200007H22Rik,1700125L08Rik     | 2.07E-12 | 11.69814 |
| BB221842  | Sh3glb1,Bif-1,AA409932,Al314629,AU015566                  | 9.29E-20 | 1.71313  |
| NM_133816 | Sh3bp4,BOG25,Al594717,AW227605                            | 1.42E-14 | 5.36454  |
| BB130014  | Sh3bp4,BOG25,Al594717,AW227605                            | 1.46E-14 | 4.29682  |
| NM_080559 | Sh3bgrl3,AU022188,1110004L05Rik                           | 0.00001  | 1.62609  |
| BM218317  | Sh3bgrl,1190008F14Rik                                     | 4.27E-15 | 3.92627  |
| BC017611  | Sgtb,MGC27660,C630001O05Rik                               | 0.00006  | 3.751    |
| NM_009163 | Sgpl1,Spl,Al428538,D10Xrf456                              | 0.00004  | 13.00395 |
| AV316937  | Sgol2,Tripin,AU018846,AV008062,                           | 0.00055  | 5.05183  |
| NM_028232 | Sgo1,Sgo1,C81037,MGC113769,3300001M08Rik                  | 0.00079  | 5.77171  |
| BB768208  | Sgk3,Cisk,2510015P22Rik,A330005P07Rik                     | 0.00054  | 2.92539  |
| AV025094  | Sftpb,SF-B,SP-B,Sftp3,Sftp-3,Al562151                     | 0.00005  | 7.4872   |
| NM_025573 | Sfrs9,25kDa,SRp30c,2610029M16Rik                          | 2.51E-07 | 1.87557  |
| BB517005  | Sfrs3,X16,AL024116                                        | 0.00007  | 2.06917  |
| BG229318  | Sfrs10,TRA2B,SIG-41,Silg41,TRA2beta                       | 3.26E-11 | 1.55297  |
| BF147037  | Sfrs1,Al482334,AW491331,1110054N12Rik                     | 0.00001  | 1.69572  |
| BF224766  | Sfpq,PSF,MGC101933,D4Ert2314e,1110004P21Rik,              | 0.00081  | 1.56551  |
| NM_011355 | Sfpi1,Dis1,PU.1,Spi-1,Sfpi-1,Tcfpu1,Tfpu.1                | 0.00021  | 1.84983  |
| AW744519  | Sfi1,mKIAA0542,231004715Rik,RP23-191E3.10                 | 0.00007  | 7.57043  |
| NM_133953 | Sf3b3,RSE1,SAP130,AA409318,mKIAA0017,                     | 5.06E-15 | 2.73662  |
| BC009141  | Sf3a3,60kDa,MGC103282,4930512K19Rik                       | 3.91E-07 | 1.66724  |
| BM229104  | Set,AA407739,Stf-IT-1,MGC118419,                          | 1.12E-06 | 1.53953  |
| BM124141  | Sertad3,Rbt1                                              | 8.14E-06 | 1.82843  |
| AF366401  | Sertad1,Sei1,AV000455,AW456625,TRIP-Br1,1110032C13Rik     | 1.01E-19 | 2.95936  |
| BI220012  | Serpinh1,J6,Cbp1,Cbp2,gp46,Hsp47,BERF-1,Serpinh2,colligin | 4.56E-14 | 3.89402  |
| NM_009776 | Serping1,C1nh,C1INH                                       | 2.41E-06 | 1.63915  |
| AK012411  | Serpinf1,Pedf,Sdf3,EPC-1,Pedfl,Al195227                   | 0.00085  | 7.34179  |
| NM_009255 | Serpine2,PI7,PN-1,Spi4,B230326M24Rik                      | 2.78E-19 | 2.47329  |



|           |                                                           |          |          |
|-----------|-----------------------------------------------------------|----------|----------|
| NM_008871 | Serpine1,PAI1,PAI-1,Planh1                                | 3.63E-10 | 15.48976 |
| NM_011454 | Serpinb6b,NK13,Spi12,ovalbumin                            | 0.00033  | 3.09846  |
| NM_009254 | Serpinb6a,Spi3,AI876477,Serpinb6,ovalbumin                | 3.43E-11 | 1.92249  |
| AF426024  | Serpinb1a,EI,EIA,LEI,PI2,MNEI,M/NEI,ELANH2                | 4.91E-06 | 3.76015  |
| NM_009252 | Serpina3n,Spi2-2,Spi2.2,Spi2/eb.4                         | 7.49E-26 | 19.50766 |
| BQ175260  | Serinc5,AIGP3,A130038L21Rik                               | 9.49E-11 | 4.81794  |
| NM_012032 | Serinc3,Tde1,AIGP1,TMS-1,DIFF33,AA959945,AA960047         | 0.00024  | 1.81181  |
| NM_017380 | Sept9,Msf,MSF1,Sint1,PNUTL4                               | 6.80E-18 | 7.63045  |
| BI689183  | Sept7,Cdc10,KIAA4020,mKIAA4020,E430034N22                 | 4.78E-12 | 1.72076  |
| AF033350  | Sept5,Pnutl1,Cdcrel1,Cdcrel-1                             | 7.56E-13 | 7.72153  |
| NM_011129 | Sept4,Bh5,Pnutl2                                          | 0.00037  | 2.37704  |
| AV304911  | Sept2,Nedd5,AW208991,mKIAA0158                            | 0.00005  | 1.50828  |
| BM120495  | Sept11,AW548875,D5Erd606e,6230410I01Rik                   | 6.34E-07 | 2.25312  |
| BG063199  | Sept10,9430099J10Rik                                      | 0.00005  | 1.60268  |
| AY043488  | Sepm,SelM,A230103K18,1500040L08Rik                        | 2.26E-20 | 2.36923  |
| BB271145  | Sema4f                                                    | 0.00045  | 3.47682  |
| AV256403  | Sema4d,CD100,Semaj,Semcl2,coll-4,Semac12                  | 4.57E-06 | 2.67645  |
| AF080090  | Sema3f,Sema4,Semak,Sema IV                                | 2.35E-07 | 6.34641  |
| Z93948    | Sema3e,Semah,AA408817,mKIAA0331                           | 3.80E-12 | 17.11887 |
| NM_009152 | Sema3a,SemD,SEMA1,Semad,coll-1,Hsema-l                    | 9.09E-06 | 3.0419   |
| AW537349  | Seh1l,Seh1,SEH1A,SEH1B,SEC13L,AW540070,2610007A16Rik      | 6.71E-06 | 2.38797  |
| AK017703  | Sec63,AI649014,AW319215,5730478J10Rik                     | 3.85E-09 | 2.86538  |
| BC003707  | Sec61a1,Sec61a,AA408394,AA410007                          | 5.69E-15 | 5.07391  |
| BM222383  | Sec311l,ABP125,ABP130,SEC31A,                             | 4.14E-12 | 1.67115  |
| AK009425  | Sec24d,Gm1349,2310020L09Rik                               | 3.32E-09 | 2.94349  |
| BC011160  | Sec23b                                                    | 2.75E-18 | 2.38995  |
| BG919982  | Sec111l,18kDa,Spc18,sid2895,Sid2895p,1810012E07Rik        | 8.50E-20 | 1.5215   |
| AW493494  | Sdk2,Sdk-2,mKIAA1514,4632412F08Rik,5330435L01Rik          | 1.10E-10 | 2.47374  |
| BM198177  | Sdf4,Cab45                                                | 4.26E-06 | 1.57394  |
| NM_022324 | Sdf2l1                                                    | 0.00004  | 4.76424  |
| AV227603  | Sdcbp,Sycl                                                | 2.91E-11 | 1.88904  |
| BB528350  | Sdc3,Synd3,syn-3,MGC65603,MGC69616,mKIAA0468              | 9.64E-12 | 2.68914  |
| AU021035  | Sdc2,Hspg1,Synd2,AA960457,syndecn-2                       | 3.63E-11 | 3.16208  |
| BI788645  | Sdc1,Synd,CD138,Synd1,syn-1,AA408134,AA409076             | 1.41E-12 | 10.43329 |
| BB274851  | Scyl3,Pace1,AW214499,6030457O16,1200016D23Rik             | 1.60E-06 | 2.76395  |
| AW124134  | Scx,ScI,BB114693                                          | 3.64E-09 | 4.42423  |
| NM_011328 | Sct                                                       | 1.46E-21 | 100      |
| AW490544  | Scrn1,SES1,AI852905,KIAA0193,mKIAA0193,                   | 1.20E-08 | 19.97127 |
| BC006859  | Scrib,Crc,CRIB,Scrb1,SCRIB1,vartul,AI118201,mKIAA0147     | 0.00011  | 2.54285  |
| AK014680  | Scpep1,Risc,AI957256,2410018F01Rik,4833411K15Rik          | 2.76E-11 | 2.00751  |
| BB533076  | Scotin,2310008D10Rik,6430628I05Rik                        | 7.95E-06 | 1.96144  |
| BB516098  | Scn5a,SkM1,Nav1.5,Nav1.5c                                 | 5.50E-21 | 19.22462 |
| BE951842  | Scn3b,Scnb3,1110001K16Rik,4833414B02Rik                   | 1.28E-20 | 7.98282  |
| BB096886  | Scn3a,Gm1000,Nav1.3                                       | 1.02E-06 | 2.31044  |
| AF397911  | Scml4,MGC49264,mFLJ00197,9330161D17                       | 4.20E-10 | 8.46764  |
| BG060909  | Scd1,ab,SCD,Scd-1,AA589638,AI265570                       | 0.00004  | 4.30486  |
| BB327612  | Sbf2,Mttr13,mMTMH1,AA414977,AI317167,4833411B01Rik,       | 1.20E-06 | 6.91034  |
| BB773592  | Sbds,SDS,CGI-97,AI836084,4733401P19Rik                    | 2.61E-07 | 1.78587  |
| NM_009121 | Sat1,Sat,SSAT,AA617398                                    | 3.40E-28 | 2.34093  |
| BI217574  | Sardh,MGC6279                                             | 0.00035  | 3.9503   |
| NM_021788 | Sap30,30kDa                                               | 0.00003  | 2.07636  |
| BB739342  | Sall1,Msal-3                                              | 0        | 9.90697  |
| NM_011315 | Saa3,Saa-3,AV098916                                       | 7.33E-06 | 10.16103 |
| NM_009114 | S100a9,p14,Cagb,GAGB,L1Ag,BEE22,MRP14,60B8Ag,AW546964     | 4.30E-35 | 18.28361 |
| NM_013650 | S100a8,p8,B8Ag,CFAg,Caga,MRP8,CP-10,60B8Ag,AI323541       | 2.39E-24 | 11.07419 |
| NM_011313 | S100a6,2A9,PRA,5B10,Cacy,CALCYCLIN                        | 1.69E-21 | 3.09941  |
| D00208    | S100a4,42a,18A2,Capl,FSp1,Mts1,pk9a,PeL98,metastasin      | 1.91E-33 | 8.12477  |
| BC021916  | S100a11,cal,EMAPI,Emap1,S100c,S100a14,MGC107585           | 7.27E-23 | 2.62049  |
| NM_009112 | S100a10,42C,p10,p11,CAL12,CLP11,Cal1l,AA409961,AL024248   | 1.06E-20 | 2.66189  |
| M98547    | Ryk,Vik,ERK-3,AW536699                                    | 0.00003  | 1.89773  |
| BM124643  | Rybp,YEAF1,MGC62213,2410018J24Rik                         | 0.00005  | 2.98003  |
| AK007455  | Rutbc3,Cip85,RUSC3,R75178,AI428557,BB175482,1810012I01Rik | 0.00011  | 6.48365  |
| D14636    | Runx2,Cbf,LS3,AML3,Osf2,Cbfa1,Cbfa-1,PEBP2aA              | 0        | 16.54669 |
| BB795285  | Runx1,AML1,Cbfa2,Pebp2a2,Pebpa2b,AI462102                 | 1.40E-45 | 26.25588 |
| AW494299  | Rufy3,Ripx,AW455998,AW538594,mKIAA0871                    | 7.30E-07 | 2.69676  |
| BB648600  | Rtn4,ASY,NOGO,NSP-CL,AA407876,AA409940,                   | 1.78E-21 | 3.62704  |

|           |                                                           |          |          |
|-----------|-----------------------------------------------------------|----------|----------|
| BF119714  | Rrm2,R2,AA407299,MGC113712                                | 7.63E-08 | 16.28626 |
| AK019964  | Rrbp1,p180,mRRp0,mRRp2,ES/130,mRRp10,                     | 7.63E-06 | 2.1913   |
| BE200500  | Rras2,TC21,C86394,2610016H24Rik                           | 1.57E-18 | 2.24929  |
| NM_019662 | Rrad,Rad,REM3                                             | 1.40E-45 | 71.51189 |
| NM_011029 | Rpsa,MLR,P40,Lamr,67kDa,Lamr1,P40-3,P40-8,Lamr1           | 0        | 2.01986  |
| AA762498  | Rps9,MGC4138,AL022771,AL022885,3010033P07Rik              | 0        | 4.92622  |
| AA419672  | Rps8,MGC107577                                            | 4.04E-09 | 1.57665  |
| AI414989  | Rps7,S7                                                   | 2.02E-21 | 1.68239  |
| AA103697  | Rps6,MGC102571,MGC103209                                  | 0.00027  | 1.85303  |
| AW108231  | Rps3,Rs_3,D7ErtD795e                                      | 1.52E-24 | 1.71177  |
| BM729504  | Rps25,2810009D21Rik                                       | 7.07E-14 | 4.80211  |
| BM119287  | Rps24,MGC107549                                           | 1.93E-07 | 2.0079   |
| NM_023133 | Rps19,MGC107694                                           | 4.06E-09 | 2.54857  |
| AW907444  | Rps18,Ke-3,H-2Ke3,H2-Ke3                                  | 1.13E-20 | 1.66727  |
| NM_013647 | Rps16,AA420385,AI317031                                   | 2.80E-45 | 1.84263  |
| NM_009091 | Rps15,rig                                                 | 6.08E-25 | 1.66772  |
| BI900577  | Rps10,MGC107635,2210402A09Rik                             | 6.07E-19 | 1.69894  |
| NM_009085 | Rpo1-1,40kDa,RPA40,AA409007,AA959927,AL024089             | 1.94E-07 | 2.08626  |
| NM_019642 | Rpn2,Rpn-2,AV261018,1300012C06Rik                         | 0.00009  | 1.75052  |
| BB519934  | Rpn1,Rpn-1,AU018702,D6Wsu137e                             | 3.67E-08 | 1.6751   |
| NM_012053 | Rpl8                                                      | 8.82E-08 | 1.5995   |
| M85235    | Rpl7,Rpl7a,Surf-3,MGC102113                               | 0        | 1.84229  |
| NM_011290 | Rpl6,MGC117949,Taxreb107                                  | 0        | 1.66438  |
| BI694945  | Rpl41,1810055P16Rik                                       | 1.99E-08 | 4.23092  |
| NM_025592 | Rpl35,2410039E09Rik                                       | 1.67E-17 | 1.54684  |
| NM_013762 | Rpl3,F2,J1,MGC103388                                      | 0        | 2.80904  |
| NM_009082 | Rpl29,Rpl43,MGC107574,MGC107575,MGC107576                 | 8.78E-08 | 1.57253  |
| BG807647  | Rpl27a,L27A,MGC66730,MGC107695                            | 5.98E-10 | 1.54497  |
| NM_009078 | Rpl19                                                     | 3.49E-19 | 1.59538  |
| AU019414  | Rpl18,L18,Rpl18a                                          | 0.00018  | 2.24683  |
| BF453369  | Rpl17,MGC103289,MGC118163                                 | 7.62E-21 | 6.4722   |
| BE993872  | Rpl14,L14,CTG-B33,AA407502,AL022816,CAG-ISL-7             | 2.06E-16 | 1.51951  |
| BF146301  | Rpl13a,MGC107571,Tstap198-7,tum-antigen,1810026N22Rik     | 9.68E-22 | 2.20092  |
| AV139821  | Rpl13,L13                                                 | 1.77E-18 | 2.69026  |
| NM_009076 | Rpl12,MGC102182,MGC102573,E430018F03                      | 0        | 1.68722  |
| AK014593  | Rpl11,2010203J19Rik                                       | 1.92E-40 | 1.94059  |
| NM_052835 | Rpl10,QM,QM16,D3Ucla2,D0HXS648,DXHXS648,                  | 1.05E-15 | 1.53998  |
| BB468437  | Ror1,mRor1,Ntrkr1,2810404D04Rik                           | 2.38E-08 | 2.79962  |
| BB519382  | Rod1,C86549,AA407443,AI462022,AW107884                    | 4.32E-11 | 6.43544  |
| BI662863  | Rock1,Rock-I,1110055K06Rik                                | 4.71E-06 | 1.57014  |
| BB366379  | Robo2,mKIAA1568,2600013A04Rik,9430089E08Rik,D230004I22Rik | 0        | 13.61527 |
| BG065230  | Robo1,DUTT1,AW494633,AW742721                             | 2.56E-36 | 7.67123  |
| BG807990  | Rnu65,MBII-351,snoRNA MBII-351                            | 0.00002  | 2.37743  |
| BQ177137  | Rnu22,snoRNA U22,U22 snoRNA                               | 0        | 3.24804  |
| BC010331  | Rnh1,RNH,C80305,AW546468                                  | 9.59E-10 | 2.14012  |
| AV045658  | Rnf4,AU018689                                             | 1.45E-08 | 1.93251  |
| AK006888  | Rnf38,Oip1,AA673263,1700065B19Rik,2610202O07Rik           | 0.0001   | 5.64276  |
| AW540162  | Rnf20,C79397,AW540162,KIAA4116,mKIAA4116,4833430L21Rik    | 0.00041  | 2.97398  |
| AF120206  | Rnf19,XYbp,UIP117,AA032313,Ubce7ip2                       | 1.13E-07 | 2.75914  |
| AV340072  | Rnf180,3110001E11Rik                                      | 1.06E-09 | 5.37549  |
| NM_013916 | Rnf12,Ha1r,RLIM,AL022832,AW743871                         | 0.00017  | 1.50481  |
| BI150320  | Rnf11                                                     | 0.00003  | 1.66744  |
| BC009002  | Rnd3,Arhe,Rhoe,AI661404,2610017M01Rik                     | 2.05E-16 | 6.27033  |
| BG072837  | Rkhd3,M-04814,mKIAA2009,4931439A04Rik                     | 1.98E-12 | 6.27577  |
| BI656279  | Rkhd2,BM-013,BC035207                                     | 4.90E-07 | 1.65546  |
| W91617    | Rkhd1,BC059858,MGC69704                                   | 0.00068  | 2.09146  |
| NM_009069 | Rit1,Rit,RIBB,ROC1                                        | 8.46E-09 | 1.53494  |
| AF477481  | Ris2,Cdt1,C76791,AW545653,2610318F11Rik                   | 0.00003  | 5.37958  |
| NM_019955 | Ripk3,Rip3,AW107945,2610528K09Rik                         | 2.60E-10 | 4.15432  |
| BC011277  | Rin1                                                      | 7.30E-13 | 6.71912  |
| BC005633  | Ric8,RIC-8,AI114950                                       | 3.28E-14 | 2.09698  |
| AB076245  | Rian,5530401N18Rik                                        | 6.83E-10 | 6.7414   |
| BM210473  | Rhox5,Pem,AA409564                                        | 0.00043  | 6.37418  |
| AF309564  | Rhoj,TCL,Arhj,TC10L,AW210585,1110005O19Rik                | 0.00016  | 2.34786  |
| BM243660  | Rhoh,Arhh,AU019774,5830400A04Rik                          | 0.00006  | 3.81602  |
| NM_019566 | Rhog,Arhg,Sid10750                                        | 0.00051  | 2.5458   |

|           |                                                       |          |          |
|-----------|-------------------------------------------------------|----------|----------|
| D89821    | Rhod,Rho,Arhd,RhoM,RhoHP1,AI326383                    | 5.14E-13 | 19.82994 |
| NM_007484 | Rhoc,Arh9,Arhc,AI324259                               | 0.00018  | 5.34771  |
| AK014194  | Rhobtb1,AI173445,AI573858,MGC107538,1700008H16Rik,    | 1.79E-09 | 1.6502   |
| AF215669  | Rgs3,C2pa,RGS3S,PDZ-RGS3,C2PA-RGS3,4930506N09Rik      | 2.73E-23 | 11.77571 |
| AV246932  | Rgs2,GOS8                                             | 0.00045  | 2.65014  |
| BB233670  | Rgs19,GAIP,AI324841,AW547781,2610042F04Rik            | 0.00076  | 2.15343  |
| U94828    | Rgs16,Rgsr,Rgs14                                      | 2.29E-07 | 12.53129 |
| AK004813  | Rgs12,AI481290,E130309H11,1200016K18Rik,4632412M04Rik | 8.97E-15 | 10.77657 |
| NM_026418 | Rgs10,MGC129414,2310010N19Rik                         | 7.18E-06 | 3.02577  |
| NM_015811 | Rgs1,BL34                                             | 0.00055  | 3.7924   |
| AV337680  | Rgag4,Mart5,KIAA2001,mKIAA2001,6430402L03Rik          | 0.00096  | 1.80822  |
| AV214521  | Rg9mtd2,Rnmtd2,AA794508,MGC107421,MGC116571           | 7.24E-09 | 3.38349  |
| BM238972  | Rfxdc2,9930116O05Rik                                  | 2.13E-07 | 4.32101  |
| BC027246  | Rfwd3,BC027246,MGC27888                               | 0.00068  | 1.60567  |
| AK011489  | Rfc5,36.5kDa,MGC113787,2610020K06Rik,2610209F07Rik    | 0.00024  | 2.50088  |
| AK013095  | Rfc3,38kDa,AU022547,2810416I22Rik                     | 0.00022  | 2.13236  |
| AK011349  | Rest,NRSF,2610008J04Rik                               | 0.00007  | 2.22809  |
| BC026463  | Rerg                                                  | 0.00002  | 7.87355  |
| NM_080726 | Rem2,AW411893                                         | 0.00007  | 4.958    |
| BB624483  | Rem1,Rem,E030011C07Rik                                | 4.41E-06 | 6.16609  |
| BB414617  | Reln,rl,reeleer                                       | 1.75E-10 | 1.8203   |
| NM_009046 | Relb                                                  | 0.00005  | 3.71606  |
| AB030503  | Rdh11,Mdt1,Psd1,SCALD,Arsdr1                          | 3.17E-09 | 4.9242   |
| BG069583  | Rdh10,AI875664,AW549993,D1Ertd762e,3110069K09Rik      | 7.00E-08 | 4.05081  |
| AW543416  | Rcor1,AU042633,D12Wsu95e,mKIAA0071,                   | 0.00007  | 2.38112  |
| BC025602  | Rcn3,RLP49,MGC102610,D7Ertd671e                       | 1.52E-20 | 2.95182  |
| NM_011992 | Rcn2,TCBP49,TCBP-49,AA408742                          | 5.61E-13 | 1.84045  |
| BB412039  | Rcn1,Rcn                                              | 0.00029  | 5.92741  |
| NM_009035 | Rbpsuh,CBF1,RBP-J,RBPjk,Igkjrj,Igkrspb,AI843960       | 0.00033  | 1.69376  |
| NM_011254 | Rbp1,Crbp,CRBPI,Rbp-1                                 | 1.03E-21 | 5.7142   |
| NM_009033 | Rbmxt,Hnrpg,MGC102184                                 | 1.89E-11 | 1.79564  |
| BM117447  | Rbms3,MGC118437,6720477E09Rik                         | 0.00075  | 3.56015  |
| AA717264  | Rbms1,YC1,MSSP-1,MSSP-2,MSSP-3,AI255215,2600014B10Rik | 6.40E-09 | 1.92723  |
| BG277926  | Rbm9,Fxh,Fbm2,Hrnbp2,AA407676,AI118529,2810460A15Rik  | 2.76E-09 | 3.77909  |
| NM_009032 | Rbm4,lark,Mlark,4921506I22Rik                         | 3.08E-07 | 1.85922  |
| AK016057  | Rbm34,6330444B11,D8Ertd233e,4930547K05Rik             | 0.00009  | 2.07561  |
| AY052560  | Rbm3,MGC118410,2600016C11Rik                          | 3.83E-07 | 2.3335   |
| BM228459  | Rbm28,AI503051,MGC12075,MGC38664,2810480G15Rik        | 0.00011  | 1.588    |
| BB776868  | Rbm15b,1810017N16Rik                                  | 0.00053  | 2.28442  |
| AV213382  | Rbm14,p16,p16K,Sytip,1300007E16Rik                    | 0.00041  | 1.67203  |
| AV111031  | Rbm13,AI314911,2600016B03Rik                          | 8.16E-12 | 1.9268   |
| BE553944  | Rbm10,MGC7826,mKIAA0122,E430039K10Rik                 | 4.96E-11 | 1.96149  |
| BB167067  | Rbbp8,CtIP,9930104E21Rik                              | 0.00041  | 2.1706   |
| AU040918  | Rbbp4,mRbAp48                                         | 6.13E-07 | 3.07002  |
| NM_009029 | Rb1,Rb,pRb,Rb-1                                       | 0.00019  | 1.92577  |
| NM_025886 | Rassf7,AW210608,2400009B11Rik                         | 3.47E-14 | 7.9875   |
| BB385028  | Rassf1,123F2,RDA32,NORE2A,REH3P21                     | 0.00036  | 2.9237   |
| BC008101  | Rasl11b,MGC103217,1190017B18Rik                       | 8.18E-06 | 2.52112  |
| BB523168  | Rasal2,6530401P13,A330066M24Rik                       | 0.00004  | 2.8319   |
| NM_009025 | Rasa3,C86362,GAPIII,AI326412,E130011G04               | 0.00037  | 2.79283  |
| NM_053268 | Rasa2,GAP1m,AA517451,AU023900,5430433H21Rik           | 0.00032  | 2.24902  |
| AA124924  | Rasa1,Gap,Rasa,RasGAP,MGC7759                         | 1.59E-14 | 1.90216  |
| BI328146  | Rarres2,AI303516,0610007L05Rik                        | 1.97E-09 | 3.2147   |
| BB035017  | Rarres1,AI662122,5430417P09Rik                        | 6.66E-09 | 7.48952  |
| AV307311  | Raph1,9430025M21Rik,C730009O10Rik                     | 2.28E-14 | 2.25161  |
| BM250883  | Rapgef6,Ragef2,Pdzgef2,AI844632,                      | 4.10E-10 | 1.8835   |
| BM230524  | Rapgef5,GFR,Mrgef,C86120,mmr-gef,                     | 0.00083  | 4.34516  |
| AK004874  | Rapgef4,Epac2,KIAA4040,mKIAA4040,                     | 1.38E-13 | 3.26167  |
| NM_016759 | Rap2ip,Rpip8                                          | 0.00022  | 6.54502  |
| BC025198  | Rap2a,5830461H18Rik                                   | 0.00035  | 1.87546  |
| BM246972  | Rap1b,2810443E11Rik                                   | 2.06E-20 | 1.66238  |
| BB211023  | Ranbp3,AA408221,2610024N24Rik                         | 0.00091  | 2.3688   |
| L25255    | Ranbp1,Htf9a                                          | 0.00087  | 1.65027  |
| AV116470  | Ran                                                   | 2.76E-06 | 1.53079  |
| NM_019511 | Ramp3,AI850306                                        | 3.77E-12 | 7.41941  |
| BF681826  | Ralgs1,RALGEF2,AI853783                               | 2.01E-10 | 2.62479  |

|           |                                                         |          |          |
|-----------|---------------------------------------------------------|----------|----------|
| BB465250  | Ralb,5730472O18Rik                                      | 0.00001  | 2.06866  |
| NM_030690 | Rai14,Norpeg,mKIAA1334,Ankyrcorbin,                     | 1.24E-41 | 4.25037  |
| BC011120  | Rad18,Rad18sc,2810024C04Rik                             | 0.00004  | 3.0919   |
| NM_012025 | Racgap1,gtl11,Band25,GTPase,                            | 4.04E-06 | 10.29167 |
| AW549708  | Rabif,MSS4,RASGFR3,AI842864,AW549708,E130318E12Rik      | 0.00013  | 1.57043  |
| BB259371  | Rabep2,Fra,MGC8300,AI462746,2610011A08Rik               | 1.20E-14 | 2.71246  |
| BC022119  | Rab6ip1,ORF37,AJ245569,AW496491,mKIAA1091,1500012B19Rik | 3.53E-12 | 1.89595  |
| BC007147  | Rab4b,1500031G17Rik                                     | 0.00065  | 2.12646  |
| AF425643  | Rab40b,rar,SEC4L                                        | 0.00004  | 4.73894  |
| BB032142  | Rab3gap2,AI851069,AW743433,mKIAA0839,                   | 4.78E-06 | 2.37096  |
| AV364767  | Rab38,cht,AU043391,MGC107581,2310011F14Rik              | 2.10E-09 | 4.34871  |
| AF327929  | Rab34,Rah,Rah1,AI326479                                 | 2.38E-18 | 2.48447  |
| NM_026405 | Rab32,AU022057,2810011A17Rik                            | 0.00005  | 2.7874   |
| NM_133685 | Rab31,AI415285,1700093E07Rik                            | 1.70E-20 | 5.88177  |
| BB121269  | Rab27b,2310021G14Rik                                    | 2.49E-23 | 12.62207 |
| NM_008999 | Rab23,opb,opb2,AW545388                                 | 0.0007   | 2.60055  |
| NM_134050 | Rab15,AI840042,2310012G06Rik                            | 0.00005  | 5.11065  |
| BM207947  | Rab14,AI314285,AI649155,0610030G24Rik                   | 6.38E-07 | 1.66928  |
| BC027214  | Rab13,0610007N03Rik,B230212B15Rik                       | 0.00003  | 1.83466  |
| AW108405  | Rab1,Gtbp,Ypt1,Rab-1,Rab1A,mKIAA3012                    | 1.09E-19 | 1.53063  |
| BM208579  | R3hdm1,R3hdm                                            | 0.00003  | 1.79023  |
| BM237031  | Qscn611,SOXN,QSOX2,BC030934,MGC31729                    | 0.00004  | 2.23024  |
| AK004486  | Pygo2,1190004M21Rik                                     | 3.07E-06 | 1.69806  |
| BB530368  | Pxn,AW108311,AW123232                                   | 3.62E-07 | 1.67738  |
| NM_021495 | Pvri3,AA407785,AU016832,AW538082,                       | 4.71E-12 | 4.21911  |
| BB049138  | Pvr,PVS,mE4,HVED,Taa1,CD155,Tage4,necl-5,               | 2.46E-13 | 10.39174 |
| BM220305  | Purb,Cager-2,AA114818,D11Bwg0414e,2310015K15Rik         | 6.47E-24 | 2.9097   |
| BB314559  | Pum1,Pumm,AA517475,mKIAA0099                            | 0.00096  | 1.70625  |
| BB498753  | Pttg1ip,C79540,AI314311,AU018448,MGC36923,1810010L20Rik | 8.81E-08 | 2.15645  |
| AF069051  | Pttg1,PTTG,Pttg3,C87862,Securin,AW555095                | 1.76E-09 | 3.2083   |
| NM_007955 | Ptprv,Esp,OST,OST-PTP,mOST-PTP                          | 0.00031  | 4.38006  |
| D88187    | Ptpru,PTP,Ptpri,RPTPlambda                              | 0.00001  | 3.07868  |
| AF129509  | Ptpr, Gmcp1,PTP-SL,PTPBR7,mPTP213                       | 1.23E-33 | 4.58645  |
| BB667296  | Ptprk,AI853699                                          | 7.18E-08 | 4.18836  |
| AI596632  | Ptprg,AW046354,AW549872                                 | 2.64E-16 | 2.41125  |
| BF235516  | Ptprf,LAR,LARS,AA591035                                 | 0.00002  | 5.93751  |
| U35368    | Ptpre,PTPe,PTPepsilon                                   | 1.35E-39 | 10.13924 |
| BC025145  | Ptprd,MGC36851,MGC113757,1110002J03Rik                  | 1.21E-20 | 4.00105  |
| AF332082  | Ptpra,Ptpa,PTP[a],RPTR[a],PTPalpha,MGC118095,RPTRalpha  | 3.64E-12 | 2.33935  |
| BB224063  | Ptpn9,MEG2                                              | 4.60E-18 | 3.82879  |
| AW987375  | Ptpn21,PTPD1,PTPRL10,MGC107492                          | 5.96E-06 | 2.97883  |
| BG076152  | Ptpn2,Ptpt,TC-PTP,AI325124                              | 0.00056  | 2.78044  |
| BM236743  | Ptpn13,RIP,Ptpri,PTP-BL,AI324989                        | 0.00082  | 12.54233 |
| AV117227  | Ptpn12,PTPG1,P19-PTP,PTP-P19,PTP-PEST                   | 2.02E-25 | 2.93731  |
| BC010191  | Ptpn1,PTP1B,PTP-1B                                      | 6.87E-16 | 1.54339  |
| BC002064  | Ptn,OSF,HARP,HBBN,HBNF,Osfl,Osfl-1,HB-GAM,HBGF-8        | 9.75E-10 | 14.7917  |
| BF787570  | Ptma,Thym,MGC102090,MGC103390                           | 3.04E-11 | 2.3604   |
| BI662615  | Ptk9,A6,twf1,twinfilin                                  | 0.00014  | 2.57694  |
| AK018379  | Ptk7,mPTK7/CCK4,8430404F20Rik                           | 0.00002  | 4.34791  |
| AV026976  | Ptk2b,A6,PKB,PTK,CAKB,FAK2,PYK2,CADTK,Raftk,            | 0.00004  | 2.75881  |
| M94967    | Ptgs2,COX2,Cox-2,PHS-2,Pghs2,TIS10,PGHS-2               | 2.44E-41 | 77.71135 |
| BB520073  | Ptgs1,COX1,Cox-1,Cox-3,Pghs1                            | 5.29E-17 | 5.59524  |
| NM_008968 | Ptgis,Cyp8,Pgi2,Pgis,Ptgi,Cyp8a1                        | 0        | 4.95242  |
| AV253087  | Ptgrm,FPRP,CD9P-1,Trim45,AU042434,4833445A08Rik         | 2.31E-12 | 2.75367  |
| BC003708  | Ptges3,Tepp,Ptges,cPGES,sid3177,5730442A20Rik           | 9.81E-06 | 1.64426  |
| BC011193  | Ptger4,EP4,Ptgerp4                                      | 3.00E-25 | 6.9793   |
| BC005440  | Ptger2,EP2,Ptgerp2                                      | 4.08E-28 | 8.81261  |
| BI076831  | Pten,TEP1,MMAC1,AI463227,2310035O07Rik,A130070J02Rik    | 4.50E-06 | 2.03428  |
| BB526117  | Ptdss1,PSS-1,AU044268,AW539008,mKIAA0024                | 3.85E-09 | 2.10852  |
| NM_008958 | Ptch2,ptc2                                              | 0.00056  | 2.34012  |
| BG071079  | Ptch1,Ptc,mes,Ptc1,Ptch,A230106A15Rik                   | 0        | 13.77366 |
| BM195033  | Ptbp2,Ptb2,nPTB,brPTB                                   | 0.00096  | 2.02689  |
| BC007472  | Ptbp1,Ptb,PTB2,PTB3,PTB4,pPTB,HNRPI,PTB-1,AA407203      | 7.57E-09 | 2.65181  |
| U87814    | Pstpip1,def-2                                           | 5.73E-07 | 13.06034 |
| BG075935  | Psrc2,BC033596                                          | 0.00021  | 1.77454  |
| BB200981  | Psme4,TEMO,AA409398,AU041366,KIAA0077,mKIAA0077         | 0.00036  | 2.67866  |

|           |                                                       |          |          |
|-----------|-------------------------------------------------------|----------|----------|
| BC006869  | Psm6,240006A19Rik                                     | 3.87E-08 | 1.94228  |
| BM730602  | Psm10,AW554874                                        | 8.03E-40 | 2.05209  |
| BC010709  | Psm5,ZETA,MGC102091,MGC118067                         | 2.69E-22 | 1.78716  |
| AK016645  | Pscd3,Grp1,AI648983,KIAA4241,mKIAA4241                | 1.73E-06 | 4.72157  |
| AK019971  | Prrx2,S8,Prx2                                         | 0        | 37.55583 |
| BB246540  | Prpsap2,MGC36957,MGC118451,A230054F23Rik              | 8.64E-10 | 1.92791  |
| BC024942  | Prps2,Prps-2,AA589463,AI464149,MGC28388,2610101M19Rik | 0.00032  | 2.78611  |
| BE994433  | Prox1,A230003G05Rik                                   | 7.95E-06 | 3.619    |
| Z25469    | Pros1,AW214361                                        | 1.44E-17 | 3.98589  |
| NM_011171 | Procr,Ccca,EPCR,AI325044                              | 2.17E-20 | 4.30583  |
| BB823350  | Prkg2,CGKII,Prkgr2,AW212535                           | 3.09E-06 | 4.48181  |
| BF160591  | Prkcn,MGC47171,4930557O20Rik,5730497N19Rik            | 0.00002  | 2.0836   |
| AV297026  | Prkcm,PKD,Pkcm                                        | 3.79E-08 | 2.08754  |
| NM_008857 | Prkci,Pkci,Pkcl,Prkcl,AI427505,KIAA4165,mKIAA4165,    | 0.00002  | 1.68841  |
| AF251036  | Prkcd,Pkcd,PKC[d],AI385711,PKCdelta,D14Ert420e        | 7.00E-09 | 3.05135  |
| BB523906  | Prkcbp1,RACK7,ZMYND8,AI316811,AL024039,MGC25852,      | 2.97E-06 | 1.93249  |
| BB274009  | Prkar1b,Rlbeta,AI385716                               | 1.08E-07 | 3.83669  |
| BC005697  | Prkar1a,Tse1,Tse-1,Rlalpha,1300018C22Rik              | 6.82E-19 | 5.87396  |
| AV024339  | Prkacb,Pkacb                                          | 1.42E-06 | 1.82489  |
| BM236715  | Prkaa1,AI194361,AI450832,AL024255,C130083N04Rik       | 1.56E-17 | 2.41312  |
| NM_008922 | Prim2,AI323589                                        | 0.00002  | 3.38441  |
| BQ177191  | Prickle2,6230400G14Rik,6720451F06Rik                  | 2.50E-08 | 3.91823  |
| BC022643  | Prickle1,Prickle,AW215793,1110058P22Rik               | 7.14E-10 | 3.68254  |
| BB005298  | Prepl,MGC7980,mKIAA0436,2810457N15Rik,                | 6.98E-33 | 4.64029  |
| NM_016764 | Prdx4,TRANK,AOE372                                    | 0.00041  | 1.96278  |
| AK018310  | Prdm5,PFM2,4432417F03Rik,6530401I24Rik,E130112L17Rik  | 9.73E-13 | 3.45546  |
| NM_007548 | Prdm1,Blimp1,Blimp-1,PRDI-BF1,ZNFPR1A1                | 0.00002  | 3.18662  |
| AK011112  | Prpc,PCP,HUMPCP,AI451719,2510048K03Rik,2610104A14Rik  | 6.79E-15 | 7.54849  |
| BC005475  | Prc1,MGC6745,D7Ert348e                                | 8.67E-06 | 7.14063  |
| NM_138602 | Praf2,JM4,Sfc20,C78013,AA986329,DXImx39e              | 0.00003  | 6.5612   |
| NM_022811 | Praf1,53kDa,Paf53,AU042259,D030019D19Rik              | 0.00006  | 3.33608  |
| BC025220  | Pqlc3,C78076,E030024M05Rik                            | 0.00012  | 1.96525  |
| AF326558  | Ppt1,PPT,CLN1,INCL,C77813,AA960502,                   | 3.51E-06 | 4.56164  |
| BC026489  | Ppp4r1,Pp4r1,MGC31567,3110001J10Rik                   | 3.34E-08 | 1.98578  |
| BB698189  | Ppp3r1,Cnb1,MCIP1                                     | 3.87E-06 | 5.57478  |
| BE986849  | Ppp1r14b,Png,PHI-1,AOM172,PLCB3N                      | 2.02E-09 | 2.95724  |
| NM_026731 | Ppp1r14a,Cpi17,1110001M11Rik                          | 6.46E-11 | 3.2516   |
| BB826954  | Ppp1r13l,wa3,Nkip1                                    | 0.00086  | 3.55644  |
| BI653999  | Ppp1r12a,Mypt1,AA792106,AV099298,D10Ert625e,          | 6.34E-10 | 1.94076  |
| BC014867  | Ppme1,Pme1,1110069N17Rik,2700017M01Rik                | 0.00024  | 1.59456  |
| BB379585  | Ppm1f,CaMKPase,MGC25978,mKIAA0015,                    | 0.00098  | 1.6199   |
| C85630    | Ppm1a,MMPa-2,MPPa-1,AI427932,AU017636,                | 0.00001  | 3.02279  |
| NM_008908 | Ppic,CyP-20c                                          | 0.00004  | 2.13489  |
| AV233043  | Ppib,Cphn2,Cphn-2,CyP-20b,AA408962,AA553318,AI844835  | 0.00064  | 3.3203   |
| NM_008907 | Ppia,Cphn,CypA,CyP-18,2700098C05                      | 3.67E-41 | 1.72378  |
| BB770905  | Pphl1,HSPC206,HSPC232,MGC27795,1110063K05Rik,         | 2.28E-13 | 2.24811  |
| NM_008906 | Ppgb,PPCA,AU019505                                    | 0.00008  | 1.8644   |
| AW550306  | Ppfibp1,AW214454,AW261454,4632409B19Rik               | 0.00039  | 3.04049  |
| AK003571  | Ppfia4,C81506,AI448359,AI852265,1110008G13Rik         | 8.05E-17 | 10.82458 |
| BE635000  | Ppapdc1,AW045471,1810019D05Rik,2310022A04Rik          | 5.61E-12 | 2.35541  |
| NM_008903 | Ppap2a,LPP1,mPAP,Hic53,LPP-1,Hpic53                   | 0.00016  | 1.5663   |
| BI110565  | Postn,PN,Osf2,peri,OSF-2,AI747096,Periostin           | 0.00058  | 3.90826  |
| NM_026190 | Polr3g,RPC7,RPC32,AV275904,2310047G20Rik              | 0.00006  | 3.64469  |
| AK003596  | Poldip3,C77954,PDIP46,AA408269                        | 0.00068  | 1.63994  |
| AK010477  | Pold4,p12,POLDS,AI463381,AW060307,2410012M21Rik       | 0.00012  | 2.22478  |
| NM_008892 | Pola1,Pola,AW321876                                   | 0.00014  | 2.3987   |
| NM_008890 | Pnmt,Pent                                             | 0.00008  | 42.77624 |
| NM_021451 | Pmaip1,Noxa                                           | 0        | 27.35827 |
| BC019530  | Plxnd1,6230425C21Rik                                  | 0.00079  | 2.0503   |
| NM_138749 | Plxnb2,Debt,mKIAA0315,1110007H23Rik                   | 1.01E-28 | 14.7179  |
| BM119522  | Plxnb1,AU042020,mKIAA0407,2900002G15Rik               | 0.00003  | 2.52713  |
| BB085537  | Plxna2,OCT,Plxn2,AA589422,AW457381,mKIAA0463          | 1.17E-08 | 2.7852   |
| NM_032398 | Plvap,PV-1,MECA32                                     | 0.00032  | 4.5302   |
| BF319989  | Plscr1,NOR1,TRA1,Tras1,Tras2,MmTRA1a,MmTRA1b          | 0.00005  | 4.94935  |
| BC005459  | Pls3,AI115446,AL024105,T-fimbrin                      | 2.76E-09 | 2.16256  |
| AK012816  | Plp2,mIIMA4,MGC102445,MGC103126                       | 2.23E-08 | 2.48537  |

|           |                                                            |          |          |
|-----------|------------------------------------------------------------|----------|----------|
| BC021352  | Plod2,LH2,Plod-2,D530025C14Rik                             | 9.55E-27 | 11.29786 |
| BB706079  | Plk4,Sak,Stk18,AI385771,1700028H20                         | 0.00052  | 6.66709  |
| NM_023320 | Plekho1,Jza2,Ckip1,JZA-20,2810052M02Rik                    | 1.09E-12 | 8.91792  |
| AW122265  | Plekh2,AI256725,mKIAA2028,E030001K05                       | 0        | 11.79915 |
| BB499987  | Plekh1,C77772,AV308913,mKIAA1200,D630024D12Rik             | 1.16E-13 | 10.89983 |
| NM_138752 | Plekhg2,Cig,Cslg,AI194308                                  | 0.00021  | 2.50886  |
| BG073502  | Plekhg1,mKIAA1209,D10Erd733e                               | 1.77E-09 | 2.87738  |
| BF159528  | Plekha7,AI414265,MGC90927,A430081P20Rik                    | 0.00023  | 2.82829  |
| BB780848  | Plekha3,FAPP1                                              | 2.15E-08 | 2.92359  |
| BM238642  | Plekha1,TAPP1,AA960558,C920009D07Rik                       | 8.13E-08 | 2.72513  |
| AF181829  | Plek,2010300B13Rik                                         | 7.74E-06 | 3.72602  |
| NM_011116 | Pld3,Sam-9                                                 | 0.00088  | 2.0342   |
| BM228590  | Pld1,Pld1a,Pld1b,C85393,AA536939                           | 0.00009  | 2.28741  |
| AK011892  | Plcd3,mKIAA1964,2610205J15Rik                              | 5.11E-06 | 6.66903  |
| NM_008872 | Plat,tPA,t-PA,AU020998,AW212668,D8Erd2e,MGC18508           | 4.34E-08 | 4.53789  |
| AF147785  | Plagl1,Lot1,Zac1                                           | 0.0008   | 2.77447  |
| AF263458  | Plac8,C15,D5Wsu111e                                        | 0.00005  | 10.71231 |
| BM198417  | Plaa,PLAP,AI536418,AU018445,AW208417                       | 0.00047  | 1.70843  |
| NM_008869 | Pla2g4a,cPLA2,Pla2g4                                       | 3.69E-26 | 8.80003  |
| AV286396  | Pkp4,Armp,p0071,MGC100358,MGC105166,                       | 2.36E-07 | 2.09032  |
| NM_019645 | Pkp1,AI528551                                              | 2.04E-11 | 14.78539 |
| AW539022  | Pknox1,PREP1,D17Wsu76e                                     | 5.60E-07 | 3.24235  |
| AV209892  | Pkig,PKIgamma                                              | 5.39E-35 | 3.54057  |
| AV113735  | Pkd2l2                                                     | 7.47E-10 | 2.23211  |
| BB249222  | Pkd2,C030034P18Rik                                         | 3.26E-11 | 1.92573  |
| NM_011097 | Pitx1,Bft,Potx,Ptx1,P-OTX                                  | 1.74E-07 | 14.16231 |
| BB095454  | Pitpnm1,Rd9,RdgB,DRES9,mpt-1,Pitpnm,R75447                 | 8.54E-07 | 3.92221  |
| BG975479  | Pitpnb,AI256223,AU040890                                   | 2.81E-10 | 21.27982 |
| BB504983  | Pisd,9030221M09Rik                                         | 1.60E-06 | 2.17897  |
| AK012196  | Pip5k2a,AW742916                                           | 2.35E-07 | 5.47356  |
| NM_008847 | Pip5k1b,Pip5b                                              | 1.36E-06 | 2.02737  |
| BB775785  | Pilra,FDFO3,AV021745                                       | 0.00006  | 2.37814  |
| BC017537  | Pik3r4,C85833,D9Erd418e,2210010O15Rik,C730038E05Rik        | 5.54E-08 | 2.01496  |
| AA414954  | Pik3r3,p55pik,AA414954                                     | 5.33E-13 | 4.16657  |
| NM_011822 | Pigq,Gpi1,Gpih,Gpi1h,Gpi1p                                 | 0.00023  | 2.21077  |
| BC011470  | Picalm,CALM,CLTH,fit1,fit-1,PAP180,KIAA4114,               | 1.42E-35 | 1.69003  |
| BI156474  | Pi4k2b,2610042N09Rik,4933409G22Rik                         | 0.00003  | 4.3469   |
| BB124449  | Phf1,Phft,Phf,AU041898,AW049785                            | 0.00006  | 5.03194  |
| BB156822  | Phr1,Pam,R75243,AU023734,AW107953,                         | 0.00076  | 2.18028  |
| AV253284  | Phldb2,LL5b,LL5beta,AV253284,C820004H04Rik                 | 2.38E-20 | 4.54136  |
| NM_009344 | Phlda1,Tdag,TDAG51,DT1P1B11                                | 1.44E-18 | 4.57259  |
| BF147362  | Phf6,mKIAA1823,2700007B13Rik,4931428F02Rik                 | 0.00004  | 1.58582  |
| AV011460  | Phf23,JUNE-1,2410141M05Rik,RP23-172M21.13                  | 1.65E-16 | 2.02188  |
| AV349060  | Phf20l1,CGI-72,E130113K22Rik                               | 3.96E-09 | 1.87971  |
| BB036856  | Phf14,AA623952,AV297001,KIAA0783,                          | 0.00001  | 2.569    |
| BB334118  | Phc2,Edr2,Mph2,AA415044,D4Erd810e,D130050K19Rik            | 2.22E-24 | 2.48417  |
| AI574180  | Pgrmc1,PPMR,Vema,HPR6.6,AA415812                           | 7.06E-10 | 1.50891  |
| BG967597  | Pgm5,4833423B07,D830025G17,9530034F03Rik                   | 0        | 5.89975  |
| AK013402  | Pgm3,PAGM,Pgm-3,C77933,BB187688,2810473H05Rik              | 0.00014  | 5.17432  |
| BI107300  | Pggt1b,BGG1,GGT1,AI451237,AI551093,2610100E13,             | 0.00006  | 1.77853  |
| NM_008827 | Pgf,Plgf,AI854365                                          | 8.66E-17 | 28.76818 |
| BC014793  | Pgd,C78335,AU019875,0610042A05Rik                          | 2.88E-07 | 1.55602  |
| BI407347  | Pgam1,Pgam-1,MGC102422,MGC118049,2310050F24Rik             | 1.90E-10 | 2.2039   |
| AI327038  | Pftk1,mKIAA0834                                            | 0.00002  | 1.74976  |
| BB076574  | Pfkip,PFK-C,1200015H23Rik,9330125N24Rik                    | 0.00032  | 7.72026  |
| AB003040  | Peg3,Pw1,End4,Gcap4,Zfp102,AL022617,mKIAA0287              | 3.06E-11 | 4.86193  |
| BC004608  | Pdzk11,AI854765,1810012H22Rik,2310079D11Rik,               | 4.55E-06 | 1.54926  |
| NM_010329 | Pdnp,T1a,Gp38,OTS-8,PA2.26,T1alpha                         | 9.87E-06 | 2.67186  |
| NM_019808 | Pdim5,Enh,LIM,Enh1,Enh2,Enh3,C87059,AI987914,1110001A05Rik | 0.00046  | 1.71398  |
| NM_019417 | Pdim4,Ril                                                  | 3.45E-12 | 6.16388  |
| BC024556  | Pdim2,Slim,MGC37634,mystique                               | 4.67E-06 | 2.64317  |
| AV013697  | Pdim1,Clim1                                                | 0.00028  | 5.8359   |
| AV086243  | Pdk3,MGC6383,AI035637,2610001M10Rik                        | 2.06E-28 | 6.86866  |
| BC006865  | Pdia6,P5,CaBP5,C77895,Txndc7,AL023058,1700015E05Rik        | 4.28E-20 | 3.1463   |
| J05186    | Pdia4,Cai,Erp72,AI987846                                   | 0.00006  | 3.68607  |
| BF319868  | Pdia3,Erp,PDI,Plca,58kDa,ERp57,ERp60,ERp61                 | 6.37E-11 | 2.91264  |

|           |                                                        |          |          |
|-----------|--------------------------------------------------------|----------|----------|
| AK004179  | Pdgfrl,AV013190,1110039P19Rik                          | 2.29E-07 | 3.56323  |
| NM_008809 | Pdgfrb,Pdgfr,CD140b,AI528809                           | 9.89E-21 | 6.25972  |
| AW537708  | Pdgfra,CD140a,Pdgfr-2,AI115593                         | 5.68E-20 | 8.64307  |
| NM_019971 | Pdgfc,AI647969,1110064L01Rik                           | 0.00002  | 2.39877  |
| BB384086  | Pde1c                                                  | 1.54E-06 | 2.68489  |
| NM_008800 | Pde1b,63kDa,Pde1b1                                     | 4.91E-08 | 8.63971  |
| NM_016744 | Pde1a,AI987702,AW125737,MGC116577                      | 8.38E-11 | 3.58108  |
| BQ180352  | Pde10a                                                 | 0.00025  | 4.86941  |
| AK004704  | Pdcl,AW108059,1200011E13Rik                            | 1.87E-06 | 1.61327  |
| AK003899  | Pdcd11,ALG-4,Pdcd7,mKIAA0185,1110021I22Rik             | 0.00007  | 2.25685  |
| BB241731  | Pcsk5,PC6,SPC6                                         | 1.37E-25 | 5.44212  |
| BC010343  | Pcna                                                   | 2.49E-18 | 2.34101  |
| BC010318  | Pck2,1810010O14Rik,9130022B02Rik                       | 0.00026  | 2.51033  |
| BB731207  | Pcdhgb1,MGC101993                                      | 4.50E-11 | 3.31569  |
| NM_053134 | Pcdhb9,Pcdhbl,Pcdhb4C                                  | 3.08E-44 | 14.52761 |
| NM_053132 | Pcdhb7,PcdhbG,Pcdhb4B                                  | 3.87E-12 | 3.00152  |
| NM_053128 | Pcdhb3,PcdhbC                                          | 1.05E-27 | 10.14614 |
| AV336932  | Pcdhb22,PcdhbV,Pcdhb15                                 | 1.92E-06 | 3.91957  |
| NM_053142 | Pcdhb17,PcdhbQ,Pcdhb16,mKIAA1621                       | 0.00016  | 2.01005  |
| BB027682  | Pcdhb16,Pcdhb8,PcdhbP                                  | 0.00005  | 6.08606  |
| NM_053135 | Pcdhb10,PcdhbJ,Pcdhb5D                                 | 0.00006  | 3.04455  |
| NM_054072 | Pcdha1,CNR,MGC90628                                    | 4.84E-11 | 5.87428  |
| BB197591  | Pcdh7                                                  | 0        | 7.2951   |
| BQ176938  | Pcdh17,Gm78,C030033F14Rik                              | 3.85E-06 | 5.61328  |
| AV225493  | Pcdh12,Pcdh14,VE-cad-2                                 | 0.00005  | 3.09223  |
| NM_025273 | Pcbd1,Dcoh,Pcbd                                        | 4.83E-08 | 7.51131  |
| NM_016768 | Pbx3                                                   | 5.12E-08 | 2.57845  |
| NM_023209 | Pbk,TPK,AW538537,D14Ert732e,2810434B10Rik              | 1.71E-06 | 4.92629  |
| BB398886  | Pawr,PAR4,Par-4                                        | 4.37E-14 | 4.03009  |
| NM_020606 | Parva,Actp,Parvin,AI225929,AU042898,CH-ILKBP           | 5.35E-08 | 13.39344 |
| AF072521  | Parp2,Adprt2,C78626,PARP-2,Adprt2,AspartI2             | 0.0001   | 1.9866   |
| AW539044  | Pard6g,Par6a,2410049N21Rik                             | 2.80E-11 | 3.57072  |
| BC022922  | Paqr7,mPR,Mpra,PGLP,AV001994,BB007237,2310021M12Rik    | 0.00055  | 1.98029  |
| BB279185  | Paqr4,1500004C10Rik                                    | 0.00065  | 2.83372  |
| NM_011863 | Papss1,SK1,Asapk,AI325286                              | 0.00012  | 1.8896   |
| AF439513  | Pappa,PAG1,PAPP-A,IGFBP-4ase,8430414N03Rik             | 7.34E-06 | 25.23813 |
| NM_019482 | Panx1,AI847747                                         | 8.00E-15 | 3.82967  |
| AK016755  | Pank2,AI642621,MGC118448,4933409I19Rik                 | 9.46E-06 | 2.20938  |
| NM_023245 | Palmd,PALML,4631423C22Rik                              | 9.60E-15 | 2.57862  |
| BB424787  | Palld,6030492A02,2410003B16Rik                         | 0.00059  | 3.98673  |
| BB468082  | Pak3,Stk4,mPAK-3,Pak65beta,Pak65alpha                  | 2.94E-07 | 8.62663  |
| NM_008776 | Pafah1b3,Pafahg,mus[g]                                 | 1.45E-06 | 4.01176  |
| BB539054  | Pafah1b2,Pafahb,mus[b],AI747451,AU021353               | 4.06E-11 | 3.12076  |
| BE688382  | Pafah1b1,Lis1,Mdsh,LIS-1,Ms10u,Pafaha,MMS10-U,MGC25297 | 5.40E-08 | 1.8844   |
| NM_011862 | Pacsin2,AI197433                                       | 5.99E-27 | 1.84407  |
| AV028400  | Pabpn1,PAB2,Pabp3,mPABII                               | 0        | 2.61426  |
| NM_008774 | Pabpc1,PABP,Pabp1,Pabpl,Pabpl1                         | 1.57E-17 | 2.19354  |
| BM232513  | P4hb,PDI,Thbp,ERp59                                    | 1.81E-08 | 2.36609  |
| BB526042  | P4ha3,RIKEN cDNA D930031A02 gene,1446951_at            | 0.00002  | 4.36676  |
| AI314028  | P4ha1,P4ha,AL022634                                    | 1.67E-07 | 1.97454  |
| AF177211  | P2ry14,P2Y14,Gpr105,A330108O13Rik                      | 6.89E-08 | 3.4905   |
| BM124050  | P2rx7,AI467586                                         | 0.00003  | 3.24305  |
| NM_130880 | Otud7,AJ430384                                         | 0.00045  | 5.62151  |
| BB530087  | Otud1,4933428L19Rik                                    | 0.00009  | 1.84081  |
| NM_013624 | Otog,twt,Otgn,4932420K09                               | 1.79E-10 | 8.6782   |
| AB015978  | Osmr,OSMRB                                             | 0.00003  | 6.64389  |
| AB074008  | Osbpl5,ORP5,Obph1,Osbp2,AI462538,1110006M06Rik         | 1.60E-07 | 2.96492  |
| AK004768  | Osbpl3,ORP3,OSBP3,MGC102333,                           | 0        | 18.11673 |
| BC002146  | Ormdl2,0610012C09Rik                                   | 2.04E-06 | 1.77756  |
| NM_019716 | Orc6l,Orc6,MGC91038,6720420I10Rik                      | 0.00055  | 2.38819  |
| BB830976  | Orc2l,Orc2,AU041563                                    | 0.00072  | 1.56985  |
| NM_010098 | Opn3,ERO,Ecpn,MGC124138                                | 0.00042  | 2.69502  |
| BI134110  | Ophn1,MGC6513,C130037N19Rik                            | 1.93E-07 | 2.13462  |
| NM_133859 | Olfml3,AI115209,AW550633,HNOEL-iso,2810002E22Rik       | 4.43E-24 | 5.60177  |
| BC025654  | Olfml2b,AI467542,1110018N05Rik,4832415H08Rik           | 3.36E-06 | 3.89531  |
| AW489058  | Olfml2a,FLJ00237,mFLJ00237,4932431K08Rik               | 8.30E-09 | 6.4817   |

|           |                                                           |          |          |
|-----------|-----------------------------------------------------------|----------|----------|
| BE952082  | Olfm1,AMY,Noe1,OlfA,AW742568,Pancortin,Pancortin3         | 0.00012  | 8.05049  |
| BB542051  | Ogn,OG,OIF,SLRR3A,mimecan,mimican,3110079A16Rik           | 0.0001   | 1.99618  |
| BM118129  | Odz3,Odz1,Ten-m3,mKIAA1455,2610100B16Rik                  | 5.47E-28 | 4.77513  |
| AV209966  | Odf1                                                      | 5.79E-14 | 11.43999 |
| C81193    | Odc1,ODC,MGC103389                                        | 0.00066  | 1.91395  |
| AV000765  | Obfc1,AI413458,0610009H20Rik,2310057J23Rik                | 1.47E-12 | 3.46667  |
| BC025020  | Oact2,AU022889,AW547221,2810049G06Rik                     | 9.36E-09 | 6.78057  |
| AV366860  | Oact1,Mboat1,BC023845,MGC38410,RP23-195A2.1,9130215M02Rik | 1.44E-07 | 8.35792  |
| BC005594  | Nxf1,Tap,Mvb1,Mex67                                       | 5.20E-08 | 1.87598  |
| AI413460  | Nvl,1200009I24Rik                                         | 0.0005   | 2.63164  |
| BC009096  | Nusap1,LNP,ANKT,SAPL,BM037,NuSAP,Q0310,                   | 0.00014  | 4.5583   |
| NM_019738 | Nupr1,p8,Com1,2310032H04Rik                               | 2.05E-10 | 2.27908  |
| BC023140  | Nup93,2410008G02Rik                                       | 2.85E-07 | 2.74863  |
| NM_053074 | Nup62,p62,Nupc1,AA589433,AI426861,AI790512,               | 8.51E-07 | 1.78268  |
| BC004655  | Nup107,C76801,AW541137                                    | 0.00004  | 3.47018  |
| BC004571  | Nudt5                                                     | 0.00018  | 2.03849  |
| BC008270  | Nudt21,25kDa,Cpsf5,AU014860,AW549947                      | 3.19E-13 | 1.50914  |
| BC025444  | Nudt14,1110030M18Rik                                      | 3.94E-06 | 2.92295  |
| BC005646  | Nudcd2,D11ErtD603e,2700047N05Rik,RP23-382C18.4            | 0.00007  | 1.54466  |
| AW542236  | Nudcd1,Cml66,CML66-L,AA407246                             | 5.48E-06 | 2.64191  |
| NM_011955 | Nubp1                                                     | 0.00001  | 2.93742  |
| BF021001  | Nuak1,AU014801,AW494241,MGC90816,B230104P22Rik            | 2.17E-18 | 3.83203  |
| BF462856  | Nt5e,NT,Nt5,eNT,CD73,AI447961,2210401F01Rik               | 0.00079  | 3.83213  |
| BC006028  | Nt5c2,GMP,NT5B,PNT5,cN-II,2010002I23Rik                   | 4.64E-08 | 2.89956  |
| NM_015807 | Nt5c,Dnt,Dnt1,Umph2,Umph-2                                | 1.73E-09 | 2.28998  |
| AV248094  | Nsg1,p21,m234,Neep21                                      | 3.76E-13 | 4.92021  |
| BM945177  | Nsd1,AI528500                                             | 1.02E-20 | 1.69048  |
| BB132137  | Nrxn3,6332407J11,D12Bwg0831e,4933401A11Rik,9330112C09Rik  | 0.00007  | 3.50618  |
| NM_134122 | Nrm,AI429796                                              | 0.00021  | 4.45042  |
| AK012873  | Nrk,Nesk,AA407323,AA409510,AI225895,AV168563,AW538185     | 1.66E-20 | 16.55042 |
| AV318914  | Nrg1,GGF,HRG,Hgl,NDF,ARIA,S MDF                           | 1.71E-27 | 14.62437 |
| BB149299  | Nrf1,C87038,D6ErtD415e                                    | 0.0001   | 2.97543  |
| BB018528  | Nras,N-ras,AV095280                                       | 1.80E-09 | 2.91044  |
| AV120130  | Nradd,NRDD,PLAIDD,BB104149,2610311B09Rik                  | 2.31E-09 | 7.35313  |
| BB703394  | Nr4a2,NOT,HZF-3,Nurr1,RNR-1,TINOR,TINUR                   | 1.69E-13 | 2.54467  |
| NM_010151 | Nr2f1,EAR3,SVP44,ErbaI3,COUPTFA,                          | 1.11E-09 | 2.7877   |
| NM_009108 | Nr1h4,Fxr,HRR1,RIP14,Rxrip14,AI957360                     | 0.0002   | 3.75719  |
| BG080055  | Npr3,Igj,stri,NPR-C                                       | 0.00003  | 4.39151  |
| AA223007  | Npnt,Nctn,POEM,AA682063,AI314031,1110009H02Rik            | 0        | 14.55509 |
| BB037433  | Npn2,HT/02                                                | 0.00019  | 3.31588  |
| AK005498  | Npm1,B23,NO38,MGC102162,MGC107291                         | 8.31E-14 | 1.8458   |
| NM_008721 | Npdc1,NPDC-1,AI314472                                     | 0.00012  | 1.53834  |
| BC007190  | Npc2,HE1,AA408070,AU045843,2700012J19Rik                  | 4.27E-12 | 2.26108  |
| BB769209  | Npc1,spm,lcsd,C85354,nmf164,D18ErtD139e                   | 0.00002  | 2.06986  |
| BG070037  | Npas2,MOP4,MGC129355                                      | 0.00078  | 4.01756  |
| M11024    | Notch4,Int3,Int-3                                         | 0.0001   | 4.75856  |
| NM_023144 | Nono,nonA,NRB54,P54NRB,AA407051,AV149256,MGC103109        | 4.20E-12 | 2.09648  |
| BC024944  | Nola2,Nhp2,D11ErtD175e,2410130M07Rik                      | 2.88E-08 | 1.64644  |
| BB729616  | Nol5,SIK,MSSP,MGC105209                                   | 4.10E-11 | 2.13048  |
| AV338483  | Nol4,Gm1262,1700013J13Rik,4930568N03Rik                   | 0.00034  | 6.21541  |
| BG071110  | Nol10,Gm67,MGC113734                                      | 0.00007  | 1.74133  |
| NM_008711 | Nog                                                       | 0.00046  | 8.15531  |
| AV167182  | Nmt2,hNMT-2,AI605445,A930001K02Rik                        | 0.00011  | 2.98384  |
| NM_138314 | Nme7,Nm23-M7,Nm23-r7,D530024H21Rik                        | 0.00049  | 1.81452  |
| BC005629  | Nme1,NM23A,AL024257                                       | 9.44E-27 | 3.58818  |
| BC016224  | Nln,C79345,4930472G13Rik                                  | 0.00071  | 2.24038  |
| BC019952  | Nkd2,AW212591,2210403L10Rik                               | 4.35E-06 | 8.6301   |
| AY032852  | Nisch,I-1,AW494485,1200007D05Rik,3202002H23Rik            | 5.08E-13 | 1.91144  |
| NM_025623 | Nipsnap3a,Nipsnap3b,2700063N13Rik                         | 0.00001  | 2.22977  |
| AV239190  | Nipa2,AB041581,2600017P10Rik,3830408P04Rik                | 0.00008  | 1.86143  |
| BC003972  | Nip7,AA408773,1110017C15Rik                               | 4.39E-14 | 1.56543  |
| BB252065  | Ninj1,AU024536                                            | 8.74E-14 | 1.83097  |
| BB781435  | Nid2,Ly111,NID-2,AW547149,nidogen-2,entactin-2            | 1.05E-08 | 4.26953  |
| X14480    | Nid1,Nid,entactin,nidogen-1,A630025O17,entactin-1         | 2.39E-06 | 3.61204  |
| AK002650  | Nhlrc2,AV002846,1200003G01Rik                             | 0.00015  | 2.34832  |
| BI407690  | Ngfrap1,Bex3,Nade,AL033356,DXWsu67e                       | 0.00049  | 3.57099  |



|           |                                                     |          |          |
|-----------|-----------------------------------------------------|----------|----------|
| D78642    | Nfya,Cbf-b,SEZ10,SEZ-10,AA407810                    | 0.00003  | 2.24012  |
| BM240058  | Nfkbiz,INAP,Mail,AA408868                           | 1.21E-09 | 6.35054  |
| L28118    | Nfkb1,p50,p105,NF-KB1,p50/p105,NF-kappaB,NF-kappaB1 | 1.15E-25 | 2.27686  |
| BB488160  | Nfat5,CAG-8,CAG80,nfat5,NFATL1,TonEBP               | 0.00005  | 1.97543  |
| AI561892  | Nespas,Gnas-as                                      | 0.00059  | 8.6739   |
| AI413223  | Nes,C78523,ESTM46,AA166324                          | 0        | 31.29144 |
| BB266960  | Nelf                                                | 2.09E-06 | 10.27498 |
| BB311061  | Nelf                                                | 5.42E-17 | 2.24712  |
| NM_021605 | Nek7,AU020186                                       | 4.25E-14 | 1.56163  |
| C77054    | Nek2,C77054,AA617254                                | 0.00016  | 4.31591  |
| BB535494  | Nedd9,E230025G09Rik                                 | 7.28E-12 | 3.12381  |
| NM_010890 | Nedd4,Nedd4a,Nedd4-1                                | 0.00016  | 1.53432  |
| BB829652  | Nedd1                                               | 0.00081  | 1.56363  |
| BM121794  | Nebi,Lnebl,1200007O21Rik,A630080F05Rik              | 0.00008  | 2.83217  |
| AI837704  | Ndrq4,Ndr4,R74996,SMAP-8,MGC7067,Ndr1-rs,D8Bwg1337e | 8.75E-14 | 8.60894  |
| BM233196  | Ncoa6ip,Pimt,D4ErtD800e                             | 0.0006   | 1.63661  |
| BM238906  | Nckap1l,Hemp1,AI463083,4930568P13Rik                | 2.67E-06 | 9.56366  |
| BE948993  | Nck2,Grb4,NCKbeta                                   | 4.59E-23 | 4.37132  |
| NM_008677 | Ncf4,p40phox,AI451400                               | 0.00013  | 3.20936  |
| BE285362  | Ncbp2,20kDa,C79367,AA536802,AI843301,5930413E18Rik  | 0.00002  | 1.70285  |
| BM201198  | Ncam1,CD56,Ncam,E-NCAM,NCAM-1                       | 0        | 22.33178 |
| BG071381  | Ncald,AI848120,D15ErtD412e,D030020D09Rik            | 0.00086  | 1.68687  |
| BB728878  | Nbr1,mKIAA0049                                      | 0.00035  | 2.03527  |
| BB022773  | Nbeal1,ALS2CR17,A530050O19Rik,A530083I02Rik         | 0.00076  | 3.10503  |
| AA986379  | Nbea,Lyst2,mKIAA1544                                | 1.00E-10 | 2.22252  |
| AW537064  | Nav3,POMFIL1,unc53H3,Pomfil1p,mKIAA0938,            | 5.44E-36 | 12.27375 |
| BE980206  | Nav1,POMFIL3,unc53H1,mKIAA1151,steerin-1            | 0.00002  | 3.11627  |
| BG064031  | Nap1l1,NAP-1,AA407126,AI256722,D10ErtD68e           | 0.00049  | 1.82623  |
| NM_013792 | Naglu                                               | 7.78E-08 | 2.25901  |
| BC021631  | Naga                                                | 0.00005  | 3.50661  |
| NM_013608 | Naca,skNAC,Gm1878,AL022831,mKIAA0363                | 9.77E-30 | 1.73657  |
| NM_008668 | Nab2,AI451907                                       | 2.08E-14 | 13.33485 |
| BB045598  | Mysm1,C130067A03Rik,C530050H10Rik                   | 0.00056  | 1.60916  |
| NM_021503 | Myoz2,Myozl2,1110012I24Rik                          | 4.54E-18 | 2.16025  |
| AW553161  | Myom3,Gm434,8430427K15Rik                           | 1.60E-26 | 8.73083  |
| NM_031189 | Myog,myo,MYF4                                       | 0        | 19.26951 |
| NM_010866 | Myod1,MYF3,MyoD,Myod-1,AI503393                     | 3.71E-27 | 5.9971   |
| AF384055  | Myocd,Srfcp,BSAC2A                                  | 2.87E-08 | 10.01479 |
| BM121122  | Myo9b                                               | 0.00001  | 4.96877  |
| AK018649  | Myo1e,myr 3,AA407778,myosin-1e                      | 0.00003  | 2.84911  |
| BQ176602  | Myo1c,MMIb,myr2,MYO1E,C80397,mm1beta                | 0.00006  | 3.80228  |
| AI255256  | Myo1b,AA406997,myosin-1b                            | 4.60E-06 | 1.56923  |
| BC003304  | Myo10,AW048724,mKIAA0799,D15ErtD600e                | 7.40E-09 | 3.47966  |
| BF451748  | Mylk,KRP,MLck,MLCK108,MLCK210                       | 1.37E-06 | 3.34452  |
| AW494458  | Myic2b,RLC-B,C77744,1500001M02Rik                   | 7.95E-10 | 1.92079  |
| BC026760  | Myl6,Myln,ESMLC,LC17A,LC17B,MLC1SM,                 | 2.26E-15 | 2.25268  |
| NM_010858 | Myl4,GT1,ALC1,AMLC,MyLa,MLC1a                       | 0        | 50.71554 |
| C80049    | Myh9,Myhn1,C80049,D0Jmb2,Myhn-1,                    | 1.65E-08 | 4.54189  |
| BB011213  | Myh8,Myhsp,Myhs-p,MyHC-pn                           | 0        | 6.10148  |
| NM_080728 | Myh7,Myhcb,Myhc-b                                   | 0.00003  | 2.92747  |
| M74753    | Myh3,Myhse,Myhs-e,MyHC-emb                          | 0        | 100      |
| AJ293626  | Myh1,Ild,MdMs,Ild/x,Myhs-f,Myhsf2                   | 0.00001  | 1.62763  |
| NM_008656 | Myf5,B130010J22Rik                                  | 2.69E-10 | 5.41211  |
| U13262    | Myef2,mKIAA1341,9430071B01                          | 4.58E-06 | 2.89489  |
| BI078799  | Myadm,D7Wsu62e                                      | 0.00066  | 1.78486  |
| BG868949  | Mxd4,Mad4,2810410A03Rik                             | 0.0003   | 1.94306  |
| BB139464  | Mvp,LRP,VAULT1,2310009M24Rik                        | 5.34E-13 | 3.47185  |
| AJ277212  | Mustn1,Mustang,1110028G01Rik                        | 9.99E-25 | 2.9062   |
| U37709    | Musk,Mik,Mdk4,Nsk1,Nsk2,Nsk3,MGC117677              | 0.00014  | 3.16206  |
| BC020027  | Muc15,4732460E09,D730046L02Rik                      | 0.00003  | 4.82951  |
| AW553649  | Mttp,MTP                                            | 8.01E-08 | 5.92009  |
| NM_008098 | Mtpn,V1,Gcdp,5033418D15Rik                          | 5.39E-11 | 2.01917  |
| AV094609  | Mttr7                                               | 0.00004  | 3.06405  |
| BC020019  | Mttr6,AI428804,AU041072,MGC27983,4022440C11Rik      | 8.71E-12 | 2.0251   |
| BE952757  | Mttr11,CRA,AI035306,BC051083,MGC59008               | 1.26E-12 | 5.9244   |
| BG076333  | Mthfd2,NMDMC,AW558851                               | 0.00002  | 3.30166  |

|           |                                                        |          |          |
|-----------|--------------------------------------------------------|----------|----------|
| AV095209  | Mthfd1,AI647056,Fthfscd1,2410004L15Rik                 | 0.00002  | 3.03802  |
| AF192558  | Mtch1,PSAP,C77849,AI255158,AU018396,2310034O17Rik      | 3.38E-07 | 2.421    |
| NM_134092 | Mtbp,MDM2BP,AI429604                                   | 6.67E-07 | 6.89839  |
| NM_008635 | Mtap7,MAP7,R75000,E-MAP-115                            | 0.0005   | 4.71259  |
| BM233608  | Mtap6,STOP,F-STOP,2810411E12Rik                        | 0.0002   | 2.77082  |
| BB731480  | Mtap1b,LC1,MAP5,MAP1B,Mtap5,Mtap-5,AI843217,A230055D22 | 3.45E-29 | 8.72818  |
| BB765000  | Mtap1a,Map1a,Mtap1,moth1,Mtap-1,AI853608,6330416M19Rik | 3.30E-06 | 2.72487  |
| AA183642  | Msr1,MSR,Scvr,MSR-A,SR-AI,SR-AII,Scara1                | 8.30E-18 | 8.18951  |
| BQ175453  | Msn,C78546                                             | 1.54E-20 | 2.93788  |
| NM_018857 | Msln,MPF                                               | 9.68E-23 | 72.06607 |
| BQ174527  | Msi2h,msi2,AI451722,AI563628,AW489193,1700105C15Rik    | 1.14E-07 | 6.2642   |
| BG798082  | Msh6,GTBP,Gtmbp,AU044881,AW550279                      | 3.98E-06 | 2.43201  |
| BC024402  | Ms4a7,CFMMA,CD2014,9130422I10Rik,A430103C15Rik         | 3.30E-08 | 5.87011  |
| NM_026835 | Ms4a6d,1110058E16Rik                                   | 2.33E-16 | 6.61944  |
| AF237910  | Ms4a6c,2200009H22Rik,2210417N07Rik                     | 0.00052  | 1.60371  |
| NM_027209 | Ms4a6b,1810027D10Rik                                   | 1.78E-07 | 2.37078  |
| U63408    | Mrvi1,Irag,BB115629                                    | 1.14E-06 | 3.51024  |
| AW536415  | Mrpl16,2310039D06Rik                                   | 0.00077  | 3.81205  |
| AY042194  | Mrgpra4,MrgA4                                          | 0.00064  | 3.15443  |
| BB528408  | Mrc2,uPARAP,Endo180,mKIAA0709                          | 0.00068  | 4.94726  |
| AK003513  | Mpzl1,PZR,1110007A10Rik                                | 1.03E-27 | 4.59293  |
| BB200034  | Mphosph1,B130024C23,C330014J10Rik                      | 2.12E-07 | 6.29569  |
| L20315    | Mpeg1,MPS1,Mpg-1                                       | 3.55E-11 | 10.0106  |
| AV094989  | Morf4I2,MRGX,Sid393p,mKIAA0026,2410017O14Rik           | 1.41E-23 | 1.83439  |
| BC017619  | Morf4I1,MRG15,TEX189,TEG-189,                          | 0.00017  | 1.5112   |
| AI452146  | Morc3,NXP2,Zcwc3,AI452146,BF318192                     | 7.53E-07 | 2.00577  |
| BB023868  | Mobk12a,A630029F06,5330417K06Rik                       | 1.23E-09 | 2.90446  |
| AV226922  | Mobk1b,MOB1,MOB4B,MGC6884,4022402H07Rik                | 1.30E-06 | 1.93666  |
| NM_008613 | Mns1,AW546487                                          | 2.52E-08 | 5.33768  |
| AA709668  | Mnab,Rnf164,2900024N03Rik,9430019J22Rik,D930043C02Rik  | 1.07E-08 | 3.46756  |
| NM_013599 | Mmp9,Clg4b,MMP-9,B/MMP9,zymogen                        | 1.15E-06 | 42.37041 |
| NM_008611 | Mmp8,BB138268                                          | 7.39E-06 | 10.32017 |
| BF147716  | Mmp2,GelA,Clg4a,MMP-2                                  | 8.69E-11 | 2.43772  |
| AF153199  | Mmp19                                                  | 2.71E-08 | 5.2336   |
| NM_008608 | Mmp14,MT1-MMP,AI325305,MT-MMP-1                        | 4.29E-18 | 14.38946 |
| NM_008607 | Mmp13,Clg,Mmp1,MMP-13                                  | 1.95E-22 | 54.7001  |
| BC019135  | Mmp12,Mmel,AV378681                                    | 2.77E-07 | 20.43408 |
| NM_008606 | Mmp11,ST3,Stmy3                                        | 7.88E-08 | 6.42548  |
| NM_019471 | Mmp10,AV377895                                         | 3.91E-08 | 100      |
| BG094874  | Mlstd2,FAR1,2600011M19Rik,3732409C05Rik                | 1.04E-14 | 5.2862   |
| NM_019914 | Mllt11,Af1q,Zfp692,AI839562                            | 2.91E-07 | 1.65223  |
| BQ176661  | Mkrm1,RFP                                              | 0.00052  | 2.58965  |
| X82786    | Mki67,Ki-67,D630048A14Rik                              | 4.27E-07 | 9.30208  |
| AI647473  | Mjd,ATX3,MJD1,Sca3,AI647473,2210008M02Rik              | 0.00084  | 5.67007  |
| BC026790  | Mis12,Misc12,AU044651,RP23-83I13.9,2510025F08Rik       | 0.00042  | 2.14746  |
| BQ175773  | Mirg,Meg9,AI852992,2810474H01Rik                       | 1.50E-34 | 27.3105  |
| BB836564  | Minpp1,AA408516                                        | 0.00008  | 1.65735  |
| AF196480  | Mid2,FXy2,Trim1                                        | 0.00003  | 2.44017  |
| BG073178  | Mid1,Fxy,61B3-R,Trim18,MGC60591,DXHXS1141              | 0.0003   | 6.30675  |
| NM_138315 | Mical1,MICAL,Nical,MGC27831,MGC38321                   | 7.51E-07 | 3.97465  |
| BG063791  | Mib1,Mib,DIP-1,MGC18948,mKIAA1323,E430019M12Rik        | 5.10E-13 | 1.85179  |
| NM_008597 | Mgp,Mglap                                              | 2.42E-33 | 4.6928   |
| NM_023799 | Mgea5,Hy5,AA408215,mKIAA0679                           | 6.87E-24 | 3.38296  |
| BC027106  | MGC38735                                               | 1.60E-08 | 2.39854  |
| AK015544  | Mgat5,GlcNAc-TV,4930471A21Rik,5330407H02Rik            | 1.36E-08 | 6.78504  |
| BB283751  | Mgat3,GnT-III,AI848272,1110038J12Rik                   | 1.34E-07 | 2.38052  |
| AI481328  | Mgat2,GNT2,CDGS2,GNT-II,AA407964,MGC37173,GLCNACTII    | 4.47E-16 | 2.00566  |
| AK006096  | Mfsd2,1700018O18Rik                                    | 1.55E-09 | 3.63493  |
| NM_008594 | Mfge8,P47,Mfgm,SED1,MFG-E8,AA408458,AI325141           | 7.61E-07 | 2.32428  |
| AV262974  | Mfap3l,NYD-sp9                                         | 9.09E-23 | 14.93934 |
| BI661422  | Mfap3,AW536327,2610509F16Rik,2700079M14Rik             | 0.00031  | 2.20034  |
| AW555393  | Mest,Peg1,AA408879,AI256745                            | 0.00007  | 2.62503  |
| NM_008587 | Mertk,Eyk,Mer,Nyk                                      | 1.39E-08 | 2.27278  |
| NM_010791 | Meox1,Mox1,Mox-1,AI385561,D330041M02Rik                | 0.00037  | 2.25062  |
| AI595932  | Mef2c,AV011172,5430401D19Rik,9930028G15Rik             | 1.03E-06 | 1.75234  |
| BM022689  | Med12l,AU044581,TRALPUSH,A130035F20,A630079M02         | 4.09E-07 | 3.51185  |

|           |                                                            |          |          |
|-----------|------------------------------------------------------------|----------|----------|
| BM235734  | Me2,NAD-ME,AW120568,D030040L20Rik                          | 1.93E-10 | 3.51703  |
| NM_133874 | Mdn1,Gm135,AA958993,A130070M06,4833432B22Rik               | 0.00028  | 2.94228  |
| X58876    | Mdm2,Mdm-2,AA415488,1700007J15Rik                          | 5.62E-06 | 2.0753   |
| M34328    | Mdk,MK,Mek,cytokine                                        | 2.34E-27 | 9.15426  |
| U13371    | Mdfic,Kdt1,Mdfid                                           | 0.00003  | 2.20393  |
| BB407228  | Mcm7,Mcnd7,mCDC47                                          | 3.91E-12 | 4.34583  |
| NM_008567 | Mcm6,Mcnd6,ASP-11,D1Wsu22e                                 | 2.97E-17 | 10.27143 |
| AI324988  | Mcm5,Cdc46,Mcnd5,mCD46,mCDC46,                             | 0.00004  | 3.6835   |
| BC013094  | Mcm4,19G,Cdc21,Mcnd4,mcndc21,                              | 9.30E-17 | 2.52865  |
| BI658327  | Mcm3,P1,Mcnd,p1.m,C80350,AL033361                          | 0.00005  | 5.12879  |
| NM_008564 | Mcm2,BM28,CDCL1,Mcnd2,AA959861,AW476101,mKIAA0030          | 0.00007  | 2.4382   |
| NM_023061 | Mcam,CD146,CD149,Muc18,s-endo,AV025631,1-gicerin,s-gicerin | 1.47E-12 | 2.74709  |
| BM220840  | Mbtd1,hemp,AA408199,AI194990                               | 3.91E-07 | 2.35871  |
| AF072249  | Mbd4,Med1                                                  | 0.00009  | 2.70725  |
| BF226671  | Matr3,AI841759,AW555618,mKIAA0723,D030046F20Rik            | 1.11E-14 | 1.62344  |
| AB049755  | Masp1,CCPII,Craf,Masp1/3,AW048060                          | 7.85E-13 | 7.54043  |
| BG076407  | Marveld2,MARVD2,Mrvldc2,BC003296,MGC55067                  | 1.25E-41 | 12.81415 |
| AV007867  | Marveld1,Mrvldc1,AI504298,MGC62793                         | 0.00001  | 2.73442  |
| AV110584  | Marcksl1,F52,Mlp,Mrp,D4Bc1,Macs2,Macs3                     | 6.98E-06 | 6.99176  |
| BG069610  | March6,mKIAA0597,3830408G03,F830029L24Rik                  | 0.00066  | 2.01117  |
| BM228525  | Mapre1,Eb1,BIM1p,AI462499,AI504412,                        | 1.22E-11 | 1.84611  |
| NM_133841 | Mapkap1,AI591529,D230039K05Rik                             | 6.57E-06 | 2.62139  |
| BC024684  | Mapk6,Erk3,Mapk4,Prkm4,Prkm6,Mapk63                        | 0.00019  | 5.64007  |
| BF450398  | Map4k4,HGK,Nik,AU045934                                    | 8.75E-15 | 12.41481 |
| D76446    | Map3k7,Tak1,C87327,B430101B05                              | 1.83E-06 | 1.73378  |
| BB144722  | Map2k5,MEK5,Mapkk5,Prkmk5,AI324775,AI428457                | 8.34E-06 | 2.13822  |
| NM_008927 | Map2k1,Mek1,MEKK1,MAPKK1,Prkmk1                            | 3.80E-07 | 1.58464  |
| BC016253  | Man2c1,1110025H24Rik                                       | 1.07E-06 | 1.65485  |
| BC005430  | Man2b1,LAMAN,AW107687                                      | 8.97E-17 | 2.27482  |
| BB637556  | Man1a2,PCR2,Man1b,AI428775,AI528764,AI854422               | 8.42E-10 | 3.04628  |
| BB070019  | Man1a,PCR1                                                 | 0.00066  | 1.70151  |
| AK004794  | Mamdc2,AI591564,1200015L10Rik                              | 0.00003  | 4.0894   |
| BG073012  | Mamdc1,Mdga2,6720489L24Rik,9330209L04Rik                   | 0.00043  | 6.01161  |
| AF319976  | Maged2,ORF1,Mage-d2                                        | 4.08E-22 | 6.45755  |
| NM_019791 | Maged1,NRAGE,Dlxin,Dlxin1,Dlxin-1                          | 0        | 5.35111  |
| BC022952  | Maff                                                       | 3.04E-06 | 10.56129 |
| NM_019499 | Mad2l1,MAD2,AA673185,MGC113763                             | 0.00044  | 2.41051  |
| BM248206  | Macf1,Acf7,MACF,Acip7,mACF7,ABP620,R74989,mKIAA0465        | 0        | 4.05292  |
| AF228913  | Mab21l1,AW047968                                           | 0.00037  | 1.90256  |
| AV094519  | Lztr1,TCFL2,AI591627,AW550890,1200003E21Rik                | 0.00089  | 2.83264  |
| AK007657  | Lzic,AW047580,1810030J04Rik                                | 1.25E-15 | 4.12963  |
| BB667084  | Lysmd3,MGC7041,BC003322,1110030H10Rik                      | 4.04E-22 | 1.94097  |
| M64608    | Lyn,Hck-2,AA407514                                         | 0.00048  | 2.27785  |
| NM_010745 | Ly86,MD1,MD-1                                              | 0.00059  | 3.63918  |
| AK010485  | Ly6k,2410015A16Rik,3110035B01Rik                           | 0.00006  | 12.4937  |
| NM_016753 | Lxn                                                        | 6.50E-20 | 6.25978  |
| BB705823  | Luzp1,Luzp,AI266952,mFLJ00226,2700072H04Rik                | 1.50E-11 | 3.08289  |
| AV309996  | Luc7l,1810045C04Rik,2410018D03Rik                          | 3.14E-08 | 1.57015  |
| NM_008520 | Ltbp3,Ltbp2,mFLJ00070                                      | 0.00009  | 2.41793  |
| NM_013589 | Ltbp2,AW208642                                             | 6.72E-24 | 18.4765  |
| AF022889  | Ltbp1,Tgfb,Ltbp-1,LTBP-1S,9830146M04,9430031G15Rik         | 2.26E-06 | 3.77534  |
| BM211048  | Ltap,Lp,Lpp1,stm,Vangl2,Vangl12,C530001F03Rik              | 0.00031  | 3.48508  |
| NM_019391 | Lsp1,p50,WP34,pp52,Lsp-1                                   | 6.36E-06 | 1.92957  |
| NM_008516 | Lrrn1,NLRR-1,2810047E21Rik                                 | 2.32E-27 | 14.84309 |
| BC027199  | Lrrk1,AW319595,MGC28646,mKIAA1790,D130026O16Rik            | 5.22E-13 | 4.31784  |
| BB315861  | Lrrc8,Lrrc5,A930019F03,4930525N13Rik                       | 0.00089  | 2.47747  |
| BC016574  | Lrrc49,AI430817,AW050057,D430025H09Rik                     | 0.00005  | 4.41552  |
| AV310220  | Lrrc41,MUF1                                                | 0.00015  | 7.73276  |
| AI506528  | Lrrc15,LIB,5430427N11Rik                                   | 0.00002  | 6.53661  |
| BG966295  | Lrrc1,AU016091,KIAA4018,MGC90936,                          | 0.00037  | 1.94709  |
| AF247637  | Lrp4,D230026E03,6430526J12Rik                              | 1.99E-34 | 3.81197  |
| AW907805  | Lrp1b,LRP-DIT,9630004P12Rik                                | 2.28E-17 | 1.51318  |
| AV254798  | Lrp12,AI848829,C820005L12Rik                               | 1.58E-07 | 2.43009  |
| BB129159  | Lrig2,BB096938,4632419I10Rik                               | 7.86E-07 | 2.97384  |
| AV231827  | Lrch2,AI316885,mKIAA1495                                   | 0.00001  | 2.63102  |
| BB297498  | Lpp,C79715,AA959454,AU024130                               | 3.17E-10 | 1.88206  |

|           |                                                          |          |          |
|-----------|----------------------------------------------------------|----------|----------|
| NM_022883 | Lpin3,AA438110,AV236139,KIAA4023,                        | 0.00034  | 2.22066  |
| AK021389  | Lpin2,AI481352,AW742896,2610511G02Rik                    | 0.00003  | 3.9205   |
| BB317079  | Lphn3,LEC3,CIRL-3,Gm1379,                                | 3.36E-12 | 14.37525 |
| AA987131  | Lphn1,Lec2,CLIBA,AI182398                                | 0.00004  | 2.33011  |
| NM_013586 | Loxl3,Lor2,Loxl2                                         | 2.66E-09 | 2.93367  |
| AF117951  | Loxl2,MGC102220,                                         | 4.23E-16 | 5.28453  |
| AF357006  | Loxl1,Loxl,MGC106801                                     | 1.40E-11 | 2.50935  |
| M65143    | Lox,TSC-160,AI893619                                     | 2.38E-18 | 5.11589  |
| BG068705  | LOC553091                                                | 2.00E-09 | 5.20501  |
| AK013903  | LOC546015                                                | 0.00003  | 2.88301  |
| BI733057  | LOC545923                                                | 1.61E-11 | 3.99282  |
| BB238427  | LOC545856                                                | 4.60E-06 | 2.04054  |
| BG074304  | LOC545754                                                | 0.00058  | 2.24216  |
| AI429562  | LOC545261                                                | 0.00036  | 2.72332  |
| AV217426  | LOC544823                                                | 1.20E-10 | 1.70843  |
| BB141228  | LOC435350                                                | 5.75E-07 | 2.10865  |
| BB087707  | LOC434585                                                | 0.00001  | 2.85295  |
| BC006770  | LOC434536                                                | 0.00023  | 2.37579  |
| BG067055  | LOC433587                                                | 2.48E-14 | 5.40358  |
| AU017189  | LOC433297                                                | 1.81E-37 | 1.95203  |
| BB166401  | LOC432971                                                | 0.00026  | 2.34228  |
| AW547688  | LOC432764                                                | 2.73E-06 | 5.00798  |
| AI837848  | LOC331528                                                | 1.04E-06 | 5.32345  |
| AW763751  | LOC277193,LOC432650,LOC432898                            | 0.00007  | 3.1688   |
| AW550321  | LOC245350                                                | 9.21E-14 | 8.7726   |
| BG073445  | LOC244512                                                | 0.00075  | 2.13926  |
| BB305660  | LOC232875                                                | 5.82E-06 | 3.43401  |
| BC002257  | LOC215866                                                | 0.00002  | 9.71235  |
| AW553387  | Lmo7,Gm914,C78582,FBXO20,mKIAA0858                       | 0.0008   | 2.99596  |
| NM_010722 | Lmnb2                                                    | 0.00022  | 14.91525 |
| AK003174  | Lmna                                                     | 8.59E-18 | 7.28857  |
| AW412503  | Lix1l,D130027M04Rik                                      | 8.35E-18 | 2.76907  |
| AV360881  | Litaf,TBX1,C85531,N4WBP3,3222402J11Rik                   | 4.31E-33 | 8.04441  |
| AV287586  | Lin7a,Veli,Veli1,LIN-7A,MALS-1,TIP-33,AI848705,MGC102231 | 0.0002   | 2.24537  |
| BB547181  | Lin10,MGC6480,BC006874,D230025D16Rik                     | 3.30E-06 | 3.59527  |
| BC005621  | Lims1,PINCH,Lims1l,PINCH1,                               | 7.55E-20 | 3.86808  |
| BB705335  | Limk2,C85310,Limk2a,Limk2b,9430059K01,A930024P04Rik      | 0.00002  | 3.74275  |
| NM_010717 | Limk1                                                    | 3.70E-12 | 10.05566 |
| BG917242  | Lhfp1,AI447312,AW050335,mKIAA0206,6030465B15             | 0.00022  | 3.63397  |
| AV149705  | Lhfp,AI194968,2810489O06Rik                              | 3.08E-14 | 2.83442  |
| NM_011175 | Lgmn,AEP,Prsc1,AI746452,AU022324                         | 1.14E-19 | 4.91454  |
| NM_010708 | Lgals9,AA407335,AI194909,AI265545,galectin-9             | 8.99E-06 | 2.77616  |
| NM_011150 | Lgals3bp,90K,CyCAP,Ppicap,MAC-2BP                        | 1.79E-08 | 2.91504  |
| X16834    | Lgals3,GBP,L-34,gal3,Mac-2                               | 9.67E-28 | 12.74886 |
| AI642438  | Lgals1,L14,Galbp,L-14.5,Lect14,AA410090,galectin-1       | 2.61E-18 | 2.50541  |
| BF658789  | Leprot1,AI854296,1110067H13Rik,1520402O14Rik             | 2.49E-08 | 1.65391  |
| BF228243  | Leprot,LEPR,VPS55,Obrgrp,MGC6694,OB-RGRP                 | 2.61E-14 | 2.9441   |
| BC003726  | Leprel2,Grcb,P3h3,BC016431                               | 1.86E-08 | 3.61538  |
| AW553532  | Leprel1,Mlat4,AW553532,4832416N06                        | 0.00028  | 9.97804  |
| BE283629  | Lepre1,Gros1,leprecan,2410024C15Rik                      | 6.14E-17 | 2.78067  |
| AV156352  | Lef1,Lef-1,AI451430,3000002B05                           | 0.00001  | 2.7457   |
| BC021467  | Ldrap1,Arh,ARH2,Arh1,FHCB1,FHCB2,AA691260                | 4.34E-09 | 2.98654  |
| BB534423  | Ldldrad3,AI194318,6430500P08                             | 7.10E-19 | 2.96485  |
| NM_008879 | Lcp1,Pls2,AW536232,L-fimbrin,D14ErtD310e                 | 1.63E-07 | 5.06194  |
| C77643    | Lats2,AV277261,AW228608,4932411G09Rik                    | 3.86E-16 | 1.65303  |
| BQ176664  | Lass6,T1L,AW544719,4732462C07Rik                         | 2.47E-13 | 6.49236  |
| AY029533  | Lass5,Trh4,AU045339,AW544927,2310081H14Rik               | 1.82E-16 | 1.84617  |
| AY029532  | Lass2,TRH3,AI225939,0610013I17Rik                        | 0.00064  | 1.57058  |
| NM_010685 | Lamp2,CD107b,Lamp-2                                      | 2.15E-14 | 1.98066  |
| BG066605  | Lamc1,Lamb2                                              | 9.86E-10 | 1.57143  |
| NM_008484 | Lamb3                                                    | 1.26E-13 | 13.67747 |
| BG970109  | Lamb1-1,C77966,C80098,C81607,Lamb-1,D130003D08Rik        | 4.02E-27 | 12.0817  |
| AV224009  | Lama5,[aj]5,AA408760,AA408762,AI853660,mKIAA0533         | 3.04E-08 | 3.42053  |
| BB053010  | Lama4                                                    | 0.00064  | 2.02817  |
| U12147    | Lama2,dy,mer,merosin,KIAA4087,mKIAA4087,5830440B04       | 3.32E-07 | 1.93222  |
| NM_008480 | Lama1,Lama,AA408497                                      | 6.85E-42 | 53.00447 |

|           |                                                          |          |          |
|-----------|----------------------------------------------------------|----------|----------|
| AK017222  | Lair1,Lair-1,mLair-1,BB115266,D7Bwg0421e,5133400011Rik   | 0.00002  | 9.16529  |
| BB373408  | Kremen1,Kremen,AV002070                                  | 1.17E-09 | 6.08565  |
| BC010202  | Kras,ras,p21B,K-ras,Kras2,Ki-ras,Kras-2,MGC7141,AI929937 | 0.00042  | 2.30403  |
| NM_008379 | Kpnb1,IPOB,Impnb,MGC8315,AA409963                        | 0.00004  | 1.66045  |
| AK014256  | Kns2,Klc1,KLC1T,60/70kDa,AI874768                        | 7.90E-10 | 2.39501  |
| BM247104  | Klh16,MGC118659                                          | 0.00013  | 2.22263  |
| BM120233  | Klh5,1300013C10Rik                                       | 2.80E-06 | 2.01803  |
| BG073366  | Klh3,Hnrpa0,1110055B05Rik,3010025E17Rik                  | 0.00046  | 1.51844  |
| NM_026167 | Klh13,Bklhd2,AI451128,mKIAA1309                          | 4.17E-12 | 2.93998  |
| BB795533  | Klhdc5,mKIAA1340,C230080I20Rik                           | 1.92E-07 | 3.1604   |
| BG069607  | Klf5,CKLF,IKLF,Bteb2,4930520J07Rik                       | 1.50E-43 | 5.3645   |
| BI328541  | Kif5b,KHC,AL022807                                       | 1.61E-10 | 2.16752  |
| NM_008443 | Kif3a,Kif3,Kifl,Kns3                                     | 3.13E-26 | 4.45513  |
| AK016720  | Kif2a,Kif2,Kns2,M-kinesin                                | 0.00062  | 1.73635  |
| AW986176  | Kif23,CHO1,Kns5,MKLP1,C87313,MKLP-1,3110001D19Rik        | 0.00013  | 16.09138 |
| BC003427  | Kif22,Kid,C81217,Kif22a,AU021460                         | 0.00007  | 10.55032 |
| NM_009004 | Kif20a,AA415432,Rab6kifl                                 | 0.00002  | 8.11999  |
| BM234447  | Kif11,Eg5,Kif8,Kifl1,Knsl1                               | 0.00056  | 3.53507  |
| BB332580  | Khsrp,KSRP,6330409F21Rik                                 | 0.00013  | 3.3078   |
| BE447456  | Khdrbs1,p62,Sam68                                        | 2.79E-10 | 1.79167  |
| AJ278133  | Kdelr2,1110007A14Rik                                     | 2.79E-12 | 1.62403  |
| NM_023645 | Kdelc1,EP58,Kdel1,1810049A15Rik,5730416C13Rik            | 1.19E-07 | 2.64091  |
| BF577853  | Kctd5,mKIAA0176,2610030N08Rik                            | 0        | 2.5942   |
| BI408602  | Kctd17,N28155,AA414907,AW742389,2900008M13Rik            | 6.28E-08 | 2.36521  |
| BB667457  | Kctd12b                                                  | 5.14E-07 | 3.01164  |
| BC006935  | Kctd10,C87062,AW536343,MGC11654                          | 1.89E-30 | 2.988    |
| C77819    | Kcns3,B230338H13,D12Erd137e                              | 0.00007  | 5.27043  |
| BE956674  | Kcnq4                                                    | 2.82E-11 | 4.53717  |
| NM_021452 | Kcnmb4,1700058G18Rik,2900045G12Rik                       | 0.00012  | 3.1525   |
| BB633976  | Kcnmb1,BKbeta1                                           | 0.00001  | 6.45048  |
| AV337635  | Kcnf1,Kv5.1,Gm1182,MGC62472                              | 1.29E-09 | 12.58218 |
| NM_020574 | Kcne3,MiRP2,2210017H05Rik                                | 0.00037  | 5.15476  |
| BI988550  | Kbtbd9,Gm68,mKIAA1921,A230106N14Rik                      | 0.00009  | 3.53483  |
| NM_008416 | Junb                                                     | 3.86E-10 | 6.41622  |
| NM_010591 | Jun,AP-1,Junc,c-jun                                      | 0.0001   | 1.69289  |
| NM_010590 | Jub                                                      | 1.90E-10 | 2.42252  |
| AK016109  | Josd3,2810003M17Rik,4930553M18Rik,5930426I11Rik          | 0.00051  | 1.77283  |
| BB015508  | Jmjd1c,TRIP8,Jmjd1c,5430433L24Rik,D630035I23Rik          | 0.00002  | 2.14631  |
| BC026605  | Jmjd1a,TGSA,Tsga,Jmjd1,mKIAA0742,                        | 0.00055  | 1.65494  |
| AF127244  | Jarid1d,Smcy                                             | 0        | 19.21125 |
| BC019446  | Jarid1b,PUT1,Plu1,PLU-1,Rb-Bp2,                          | 2.44E-07 | 2.7718   |
| AK017692  | Jam3,JAM-3,JAM-C,Jcam3,C85515,1110002N23Rik              | 4.65E-08 | 3.31047  |
| AK010826  | Jam2,JAM-2,JAM-B,Jcam2,VE-JAM,                           | 2.42E-08 | 6.24938  |
| AA880220  | Jag1,Htu,Ser-1,slalom,Serrate-1,Headturner               | 3.48E-08 | 5.4405   |
| BB559054  | Its2,Ese2,Sh3d1B,Sh3p18,AI327390,mKIAA1256               | 0.00018  | 5.38423  |
| NM_025922 | Itpa,Itp,AU020102,2010016I08Rik                          | 1.83E-07 | 1.58619  |
| NM_022417 | Iitm2c,E25,BRI3,E25C,ITM3,R75508,AU041202,3110038L02Rik  | 5.52E-08 | 2.30001  |
| BB724781  | Iitm1,AA408947,BB081708                                  | 1.51E-15 | 2.66203  |
| NM_021359 | Iitgb6,2210409C20Rik,4831415H04Rik                       | 0.00003  | 2.34388  |
| NM_010580 | Iitgb5,[b]5,[b]-5,[b]5A,[b]5B,beta5,ESTM23               | 0.00046  | 4.16048  |
| AV352983  | Iitgb3,CD61,INGRB3                                       | 2.74E-12 | 20.62538 |
| U37029    | Iitgb1,CD29,FnrB,gplla,AA409975,AA960159,4633401G24Rik   | 7.66E-27 | 5.05866  |
| NM_021334 | Iitgax,Cr4,N418,Cd11c,AI449405                           | 1.69E-19 | 7.77869  |
| NM_008402 | Iitgav,CD51,1110004F14Rik,2610028E01Rik                  | 0.00034  | 3.15768  |
| BG067332  | Iitga9,(alpha)9,D130073C02,D9Erd428e,2610002H11Rik       | 5.20E-07 | 5.03639  |
| NM_008398 | Iitga7,[a]7,alpha7                                       | 0.00067  | 2.99432  |
| BB493533  | Iitga5,Fnra,Cd49e                                        | 0.00002  | 11.17935 |
| BB668008  | Iitga4,CD49D                                             | 2.22E-10 | 5.89284  |
| AV071536  | Iitga1,Vla1,CD49A,E130012M19Rik                          | 0.00015  | 2.06533  |
| NM_023627 | Isyna1,AU018670,1300017C10Rik                            | 0.00001  | 4.63648  |
| NM_012043 | Islr,AW553146                                            | 3.66E-08 | 2.3947   |
| BQ176915  | Isl1                                                     | 0.00079  | 6.33495  |
| BG069095  | Irf8,Myls,ICSBP,IRF-8,Icsbp1,AI893568                    | 0.00001  | 3.8381   |
| NM_016851 | Irf6,mirf6,AI876454,E230028I05Rik                        | 3.80E-43 | 77.26624 |
| NM_016849 | Irf3,IRF-3,MGC91046,C920001K05Rik                        | 0.00008  | 3.70608  |
| AV241470  | Irak2,IRAK-2,AI649099,MGC102586,6330415L08Rik            | 9.07E-11 | 2.18084  |

|           |                                                            |          |          |
|-----------|------------------------------------------------------------|----------|----------|
| NM_016721 | Iqgap1,AA682088,mKIAA0051,D7ErtD237e,D7ErtD257e            | 1.24E-11 | 2.40961  |
| BB499356  | Ipo9,Imp9,C78347,Ranbp9,mKIAA1192,0710008K06Rik            | 2.79E-12 | 4.55894  |
| BG922298  | Ipo7,Imp7,Ranbp7,C330016G14,A330055O14Rik                  | 3.48E-08 | 2.15838  |
| NM_008386 | Ins1,Ins-1,Ins2-rs1                                        | 0.00058  | 3.63173  |
| AV033355  | Inpp5f,SAC2,cl-27,AI115354,AW561896,                       | 0.00012  | 2.3126   |
| U39203    | Inpp5d,SHIP,145kDa,SHIP-1,s-SHIP,AI323613,MGC117680        | 9.49E-14 | 8.72322  |
| NM_008380 | Inhba                                                      | 1.07E-08 | 4.14325  |
| NM_010564 | Inha,AW555078                                              | 1.81E-20 | 8.63945  |
| BC016573  | Ing1,mING1h,p33Ing1,AA407184,AI875420,2610028J21Rik        | 0.00003  | 1.69938  |
| BB418702  | Incenp,C77457,AU019509,C130081E20,2700067E22Rik            | 1.63E-06 | 4.17644  |
| NM_008378 | Impact,E430016J11Rik                                       | 3.14E-09 | 2.19189  |
| BC011427  | Ilkap,PP2C-DELTA,0710007A14Rik,1600009O09Rik               | 2.20E-13 | 2.69446  |
| NM_010562 | Ilk,ESTM24,AA511515                                        | 3.28E-23 | 2.03889  |
| BG069530  | Ilf3,NF90,MPHOSPH4                                         | 1.02E-06 | 3.10016  |
| AI573431  | Ilf7r,CD127,MGC107557                                      | 0.00012  | 2.54298  |
| AF000304  | Il4ra,Il4r,CD124                                           | 3.68E-08 | 10.84125 |
| L20048    | Il2rg,[g]c,CD132,gamma(c)                                  | 2.77E-18 | 12.48898 |
| L20048    | Il2rg,[g]c,CD132,gamma(c)                                  | 0.00009  | 2.37188  |
| M57525    | Il1rn,IL-1ra,F630041P17Rik                                 | 1.03E-08 | 22.44435 |
| NM_010743 | Il1r1,T1,St2,DER4,Ly84,ST2L,Fit-1,T1/ST2,St2-rs1           | 0.00005  | 74.77483 |
| NM_008362 | Il1r1,CD121a,CD121b,Il1r-1,MGC129154                       | 1.22E-20 | 18.99059 |
| BC011437  | Il1b,Il-1b,IL-1beta                                        | 3.03E-06 | 3.08832  |
| NM_134159 | Il17rc,Il17rl,IL-17RC,IL17-RC,IL17-RL,1110025H02Rik        | 0.00027  | 3.13657  |
| BB730912  | Il13ra1,NR4,Il13ra,CD213a1,AI882074,IL-13r[a]              | 6.93E-10 | 7.32586  |
| BI559093  | Ikbkg,NEMO,IKK[g],AI848108,AI851264,AW124339,1110037D23Rik | 0.00063  | 1.62988  |
| BC014739  | Ik,MuRED                                                   | 8.77E-07 | 1.51001  |
| AK005166  | Ihpk2,AW050208,1500005N04Rik                               | 0.00025  | 2.84876  |
| NM_030691 | Igsf6                                                      | 0.00026  | 6.14523  |
| NM_018770 | Igsf4a,BI2,ST17,Igsf4,Nec12,Tslc1,                         | 1.57E-06 | 3.17645  |
| BB484576  | Igsf3,V7,Cd101,Igsf2,                                      | 0.00063  | 6.25414  |
| AV245981  | Igsf1,AI747649,mKIAA0364,5330413N23,5530402E03,InhBP/p120  | 3.43E-12 | 6.17756  |
| AF065325  | Igh-VJ558,MGC6727,AI893585,MGC118142                       | 0.00027  | 3.54071  |
| AI481026  | Igfbp7,Fstl2,mac25                                         | 3.18E-42 | 3.87232  |
| NM_010517 | Igfbp4,Deb2,IGFBP-4,AI875747                               | 0.00025  | 7.81164  |
| AV175389  | Igfbp3,IGFBP-3,IGfbbp3,AI649005                            | 5.01E-17 | 6.03826  |
| BG092290  | Igf2r,CD222,C1-MPR,Mpr300,AI661837,M6P/IGF2R               | 1.06E-06 | 3.85356  |
| NM_010514 | Igf2,Mpr,M6pr,Peg2,Igf-2,Igf-II,AL033362                   | 0        | 16.37525 |
| AW553541  | Igf1r,CD221,IGF-1R                                         | 0.00017  | 3.7524   |
| NM_010512 | Igf1,Igf-1,Igf-I,C730016P09Rik                             | 0.0001   | 2.06866  |
| NM_009879 | Ift81,Cdv1,CDV-1,CDV-1R,AW060663                           | 1.50E-14 | 3.22981  |
| BC013814  | Ift80,Wdr56,mKIAA1374,4921524P20Rik                        | 7.16E-09 | 2.78104  |
| AV319292  | Ift122,Wdr10,C86139                                        | 4.53E-06 | 3.96721  |
| NM_010511 | Ifngr1,Ifgr,CD119,Ifngr,Nktar,IFN-gamma R                  | 0.00006  | 1.98733  |
| NM_010508 | Ilnar1,Ilnar,Ilnar,CD118,Ilnar,Ilnar                       | 4.47E-11 | 2.0269   |
| BC010291  | Ilfitm3,Fgls,IP15,Cd225,mil-1,Cdw217,1110004C05Rik         | 1.55E-06 | 1.89058  |
| BC027285  | Ilfitm1,Mil2,MGC107121,1110036C17Rik                       | 1.53E-23 | 8.90181  |
| NM_008332 | Ilfit2,Ili54,AV302338                                      | 9.32E-15 | 3.24527  |
| NM_008330 | Ili47,47kDa,Ilgp4,Ilgp4,IRG-47,Olf56                       | 0.00009  | 5.22798  |
| NM_030244 | Ier5l,2610524G09Rik                                        | 1.53E-06 | 2.78749  |
| BF147705  | Ier5                                                       | 0.00002  | 1.68794  |
| BB114402  | Ier3ip1,AI644142,AL022842,AL022863,AV026606,1110057H19Rik  | 0.00089  | 1.51228  |
| NM_133662 | Ier3,cl-3,IEX-1,gly96,AI663993                             | 9.23E-07 | 2.47082  |
| NM_010499 | Ier2,ch1,pip92,AI317238                                    | 0.00056  | 2.00368  |
| BB121406  | Id4,Idb4                                                   | 5.65E-18 | 4.91341  |
| NM_008321 | Id3,Idb3,HLH462                                            | 1.42E-27 | 6.651    |
| NM_010496 | Id2,Idb2,C78922,AI255428                                   | 1.03E-20 | 7.23516  |
| U43884    | Id1,Idb1,AI323524,D2Wsu140e                                | 1.22E-09 | 5.7462   |
| BB523428  | ICRFP703B1614Q5.6,BCA3,C11orf17                            | 0.00001  | 2.06697  |
| BB376918  | Ick,AI848300,2210420N10Rik                                 | 0.00022  | 2.02965  |
| AK005965  | Ica1,69kDa,ICA69                                           | 0.00085  | 2.30813  |
| L20232    | Ibsp,BSP                                                   | 8.01E-11 | 100      |
| NM_010489 | Hyal2,AI256841,AU020858,AW555733                           | 0.00036  | 3.8494   |
| NM_019564 | Htra1,L56,HTRA,Prss11,RSPP11,AI429470                      | 1.17E-42 | 6.42832  |
| NM_008311 | Htr2b,5-HT2B,AJ012488,AV377389                             | 5.76E-09 | 13.94861 |
| AF061972  | Htatip2,CC3,30kDa,TIP30,AW111545                           | 0.00017  | 2.03284  |
| NM_008305 | Hspg2,Pcn,Plc,per,AI852380,perlecan                        | 0.00016  | 1.60819  |

|           |                                                         |          |          |
|-----------|---------------------------------------------------------|----------|----------|
| C77384    | Hspca,hsp4,86kDa,89kDa,Hsp89,Hsp90                      | 6.15E-11 | 4.75502  |
| AF250139  | Hspb8,H11,Cryac,E2IG1,HSP22,D5Ucla4                     | 0.00093  | 1.547    |
| BC006722  | Hspa8,70kDa,Hsc70,Hsc71                                 | 0.00024  | 1.52826  |
| NM_133804 | Hspa5bp1,R74613,6720481D13Rik                           | 5.53E-06 | 3.85335  |
| NM_022310 | Hspa5,Bip,Sez7,mBiP,78kDa,Grp78,SEZ-7                   | 3.40E-10 | 2.56325  |
| NM_011020 | Hspa4I,94kDa,APG-1,Osp94,AI461691,MGC117843             | 8.74E-32 | 4.64017  |
| M12573    | Hspa1b,70kDa,Hsp70,hsp68,HSP70A1,Hsp70-1,Hsp70.1        | 1.36E-10 | 5.01561  |
| BI499717  | Hsp110,105kDa,Hsp105,hsp-E7I,AI790491                   | 6.66E-06 | 4.06405  |
| AK016553  | Hsf2bp,4932437G14Rik                                    | 2.56E-12 | 5.81952  |
| BM208677  | Hsd17b12,Kik1,KIK-I,AI172963,2610510O05Rik              | 0.00095  | 2.91943  |
| BG918344  | Hs3st3b1,3Ost3b,3OST3B1,Hs3st3b,3-OST-3B,               | 1.89E-07 | 9.80155  |
| AV346600  | Hs2st1,Hs2st,AW214369,mKIAA0448                         | 2.13E-09 | 3.90116  |
| BC022899  | Hrmt1I6,PRMT6,AW124876,BB233495                         | 5.61E-07 | 3.69133  |
| AK020120  | Hrmt1I2,Mrmt1,Prmt1,AW214366,6720434D09Rik              | 0.00003  | 1.62479  |
| NM_133182 | Hrmt1I1,Prmt2,AI504737                                  | 3.48E-08 | 4.05871  |
| BB130716  | Hrb,RAB,Rip,C85612,AU045498,C130049H11Rik,D730048C23Rik | 1.52E-06 | 1.61208  |
| BG094050  | Hpse,Hpa,HSE1,Hpr1                                      | 0.00003  | 5.67632  |
| NM_019424 | Hps1,ep,Hps,BB405864,MGC102063,6030422N11Rik            | 0.00015  | 5.07215  |
| NM_013556 | Hprt1,Hprt,HPGRT,C81579,MGC103149                       | 7.13E-14 | 1.83563  |
| AF193796  | Hoxc13                                                  | 5.48E-06 | 9.20732  |
| NM_010450 | Hoxa11,Hox-1.9,Hoxa-11                                  | 0.00025  | 4.76351  |
| BC005773  | Homer3,AW146114                                         | 0.00016  | 2.91129  |
| BF228203  | Hnrpu,SAFA,Sp120,C86794                                 | 5.67E-21 | 1.74653  |
| BB822465  | Hnrpr,hnRNPR,2610003J05Rik                              | 0.00071  | 3.12166  |
| NM_025279 | Hnrpk,NOVA,hnRNPK,MGC102032                             | 1.24E-10 | 1.71553  |
| AW412441  | Hnrpf,AA407306,MGC36971,MGC101981,4833420I20Rik         | 3.56E-25 | 2.27324  |
| NM_016884 | Hnrpc,Hnrpc,Hnrpc1,Hnrpc2,hnRNPC1,                      | 2.95E-16 | 1.85214  |
| BC024454  | Hnrpa3,hnRNPA3,MGC37309,MGC101940,                      | 0        | 2.47062  |
| BI663320  | Hnrpa1,Hdp,hnrnp-A1,MGC102127,MGC102128                 | 7.49E-13 | 2.24371  |
| BI453712  | Hn1                                                     | 3.61E-13 | 1.70356  |
| NM_010442 | Hmox1,HO-1,Hmox,Hemox,Hsp32,D8Wsu38e                    | 0.00009  | 3.53641  |
| X64550    | Hmmr,CD168,Rhamm,AA386826                               | 0.00027  | 3.1875   |
| BF464696  | Hmgn1,Hmg14,HMG-14,MGC103397                            | 2.31E-15 | 2.04902  |
| BB123978  | Hmgcr,Red,HMG-CoAR,MGC103269                            | 2.66E-06 | 3.01986  |
| AU018946  | Hmgb2I1,AI316803,E430025G12,4733401K04Rik               | 1.99E-15 | 1.83623  |
| X67668    | Hmgb2,Hmg2,HMG-2,C80539,MGC103184                       | 6.65E-06 | 3.28984  |
| X58380    | Hmga2,pg,Hmgic,pygmy,HMGI-C,MGC103393,9430083A20Rik     | 3.52E-06 | 3.18969  |
| BB459907  | Hmg20a,lbraf,1200004E06Rik,5730490E10Rik                | 0.00076  | 2.95531  |
| NM_010438 | Hk1,dea,Hk-1,Hk1-s,mHk1-s,BB404130                      | 2.22E-06 | 9.97592  |
| BB164127  | Hivep3,Rc,Krc,KBP1,Zas3,AI848000,A130075N07             | 0.00002  | 2.72289  |
| W91024    | Hist1h2ao                                               | 4.33E-09 | 8.33147  |
| BB320674  | Hip1,HIP-1,KIAA4113,MGC27616,                           | 0.00002  | 3.86271  |
| X95580    | Hif1a,MOP1,AA959795,HIF-1alpha                          | 7.69E-06 | 2.05273  |
| NM_133680 | Hiat11,AU045608,AW539692,5730414C17Rik                  | 1.72E-13 | 2.14277  |
| NM_020259 | Hhip,Hip,Hip1,Hhip1                                     | 4.79E-13 | 30.58277 |
| BB751267  | Hhat,Skn,AI462858,MGC11697,2810432O22Rik                | 0.00023  | 6.81539  |
| BB476818  | Hgf,NK1,NK2,HGF/SF,SF/HGF,C230052L06Rik                 | 2.92E-13 | 20.30538 |
| BB310549  | Heyl,Hrt3,hesr3                                         | 2.28E-15 | 3.46851  |
| NM_010423 | Hey1,HRT1,Herp2,hesr-1,AI316788,AI414254                | 1.32E-21 | 7.37224  |
| AV225808  | Hexb                                                    | 0.00001  | 2.1834   |
| U07631    | Hexa,Hex-1                                              | 2.27E-16 | 1.85836  |
| AI326893  | Hes6,AI326893                                           | 0        | 39.96836 |
| BC018375  | Hes1,Hry                                                | 0.00013  | 1.89231  |
| AW208668  | Herc5,CEB1,Herc6,                                       | 0.00063  | 2.80773  |
| AV230520  | Herc4,mKIAA1593,1700056O17Rik,4921531D01Rik             | 0.00025  | 2.13457  |
| BG070273  | Helb,AI447783,D10Ertid664e                              | 0.00063  | 3.50634  |
| BB291880  | Hdgrp3,HRP-3,2700022B06Rik                              | 0.00048  | 2.1645   |
| NM_010413 | Hdac6,Sfc6,Hdac5,mHDA2                                  | 0.0005   | 2.94583  |
| NM_008228 | Hdac1,HD1,RPD3,Hdac1-ps,MGC102534,MGC118085             | 2.28E-18 | 3.22375  |
| BM246401  | Hck,Bmk,Hck-1,AI849071,MGC18625                         | 0.00076  | 3.71675  |
| BB053418  | Hbxap,RSF1,XAP8,p325,Gm164,MGC90806                     | 2.08E-07 | 3.11827  |
| L07264    | Hbegf,DTS,Dtr,Hegf,HB-EGF,AW047313,MGC107656            | 4.05E-06 | 4.40718  |
| NM_008216 | Has2                                                    | 1.32E-07 | 4.34316  |
| BB451746  | Hars,MMHRS                                              | 3.62E-22 | 1.90615  |
| AK005204  | H47,H4,H-4,H-47,Sels,C78786,1500011E07Rik               | 8.36E-06 | 1.59454  |
| BI903743  | H3f3b,H3.3B,9430068D06Rik                               | 1.61E-27 | 2.82193  |

|           |                                                         |          |          |
|-----------|---------------------------------------------------------|----------|----------|
| NM_010398 | H2-T23,37b,37c,Qa1,Qa-1,T18c                            | 0.00007  | 1.7661   |
| NM_008205 | H2-M9                                                   | 6.64E-08 | 12.83887 |
| NM_010382 | H2-Eb1,Ia4,H2Eb,Ia-4,H-2Eb,H2-Eb,E-beta-b,H-2E beta     | 0.00014  | 7.1906   |
| NM_010388 | H2-DMb2,H-2Mb2,H2-Mb2                                   | 1.29E-11 | 13.01168 |
| AW547431  | H2afy2,macroH2A2,4933432H23Rik                          | 0.0002   | 3.01012  |
| NM_010379 | H2-Ab1,Rmcs1                                            | 0.00035  | 2.61989  |
| AV086906  | H2-Aa,Ia1,Ia-1,H-2Aa,Aalpha,IAalpha                     | 7.35E-11 | 3.2029   |
| NM_010376 | H13,Spp,H-13,PSL3,AV020344                              | 3.57E-06 | 1.75342  |
| BF683028  | Gyk,GK,D930012N15Rik                                    | 4.77E-08 | 2.97214  |
| AK002832  | Gusb,g,Gur,Gus,Gut,asd,Gus-r,Gus-s,Gus-t,Gus-u,AI747421 | 3.51E-06 | 3.5403   |
| BB138485  | Gulp1,Ced6,GULP,CED-6,3110030A04Rik,5730529O06Rik       | 3.39E-06 | 2.01356  |
| BF472806  | Gucy1b3,GC-S-beta-1                                     | 3.78E-15 | 2.89957  |
| NM_008187 | Gtl3,T10-2A2,AL024127,2600014O15Rik                     | 0.00034  | 2.23781  |
| Y13832    | Gtl2,Meg3,R74756,R75394,AI425946,                       | 1.54E-31 | 15.54576 |
| AI550317  | Gtf2ird1,BEN,GTF3,ESTM9,Cream1,Gtf2il,                  | 6.42E-06 | 8.42928  |
| AV325174  | Gtf2f1,RAP74,C76800,2810405L04Rik                       | 1.16E-24 | 1.95673  |
| NM_026584 | Gtf2e2,34kDa,AI462509,C330006J08Rik                     | 1.21E-25 | 1.82238  |
| BI408524  | Grit,RICS,GC-GAP,KIAA0712,mKIAA0712,p200RhoGAP          | 0.00006  | 2.82128  |
| BC013080  | Grhl1,MGR,LBP-32,Tcfcp2l2                               | 3.27E-12 | 10.74944 |
| AF022072  | Grb10,Meg1,AI325020,mKIAA0207,5730571D09Rik             | 4.97E-07 | 1.84592  |
| NM_024198 | Gpx7,GPX6,AI327032,3110050F08Rik                        | 2.62E-43 | 2.13813  |
| NM_008161 | Gpx3,GPx,AA960521                                       | 0.00001  | 3.34828  |
| BI219063  | Gpx1,Gpx,CGPx,GPx-1,GSHPx-1,AI195024,AL033363           | 6.78E-10 | 1.55556  |
| NM_134116 | Gpsm3,AGS4,AA960287                                     | 0.00011  | 2.10327  |
| BC026486  | Gpsm1,Ags3,AW107933,1810037C22Rik                       | 0.00001  | 6.85033  |
| BC019379  | Gprk5,GRK5                                              | 6.70E-17 | 2.51718  |
| BC020004  | Gprc5b,Raig2,AW125761                                   | 2.89E-28 | 4.11827  |
| BC027187  | Gprasp1,GASP,GASP1,MGC100209                            | 1.60E-06 | 2.30539  |
| BB538372  | Gpr68,BB131428                                          | 4.83E-09 | 10.75514 |
| NM_008152 | Gpr65,Dig1,TDAG8,Gpcr25                                 | 1.19E-09 | 5.78139  |
| BQ175510  | Gpr37,Pael-R,AI848630                                   | 2.40E-10 | 6.72152  |
| AK004377  | Gpr153,PGR1,AI449320,1110065N12Rik                      | 0.00003  | 2.59105  |
| NM_054044 | Gpr124,Tem5,mKIAA1531,8430414C08Rik,9530074E10Rik       | 1.42E-13 | 16.43591 |
| NM_008156 | Gpld1,AW546131,6330541J12Rik                            | 1.11E-10 | 8.90549  |
| BE981338  | Gpiap1,P137,Gpiap,AL022980,MMGPIP137                    | 0.00028  | 1.63491  |
| BB493031  | Gpc6,AI480529,MGC32221,6720429C22Rik                    | 0.00011  | 3.01107  |
| NM_010327 | Gp1bb                                                   | 5.31E-07 | 6.4147   |
| BI659593  | Gopc,CAL,FIG,PIST,GOPC1,AI844555,2210402P09Rik          | 0.00004  | 2.98871  |
| BE981485  | Golph4,P138,GIMPC,GPP130,MGC102202,3110027H23Rik        | 2.93E-10 | 2.78632  |
| BM213299  | Golgb1,AU042952,KIAA4151,mKIAA4151                      | 1.75E-06 | 1.83308  |
| D78270    | Golga3,Mea2,Mea-2,AI449376,AW490576                     | 0.00014  | 2.9677   |
| AV347903  | Gng4,4                                                  | 3.29E-10 | 8.7431   |
| BB522409  | Gng2,82,1110003P13Rik                                   | 0.00001  | 9.13731  |
| AW228775  | Gng12,AA536815,AI115529,AI314170,AI842738,2010305F15Rik | 0.00005  | 1.54829  |
| NM_025277 | Gng10,AV006524                                          | 3.01E-06 | 1.84776  |
| BQ174397  | Gnb4,G(beta)4,6720453A21Rik                             | 0.00005  | 9.2992   |
| BM210111  | Gnb2l1,p205,Rack1,GB-like,Gnb2-rs1                      | 2.11E-20 | 1.81733  |
| NM_008142 | Gnb1,Gnb-1,C77571,AA409223,MGC98074                     | 1.38E-16 | 1.92578  |
| AI326356  | Gnaz,Gz,AI847979                                        | 9.85E-07 | 6.81835  |
| AV253089  | Gnas,P1,P2,P3,GSP,Gsa,POH,GPSA,Nesp,                    | 3.79E-06 | 5.3034   |
| W41916    | Gnaq,Gq,Dsk1,Dsk10,Galphaq,                             | 2.00E-07 | 2.04497  |
| BM207342  | Gnai3,Gnai-3,AI158965,AW537698                          | 1.69E-12 | 2.18689  |
| U38501    | Gnai1,Gnai-1,AU046200,Gialpha1                          | 0.00026  | 2.35789  |
| BG073165  | Gna13,AU024132,AU043124,Galpha13                        | 1.16E-06 | 1.79612  |
| NM_134075 | Gmpr2,AA959850,1810008P16Rik,5730544D12Rik              | 9.32E-14 | 2.40158  |
| BI410722  | Gmppb,AI317178,E430010H19                               | 0.00055  | 2.28747  |
| BB039426  | Gmeb1,AI256615,AI481278,1110050A04Rik                   | 0.00004  | 4.72709  |
| AI747296  | Gmds,C87208,BC031788,MGC18773,MGC103045                 | 0.00002  | 2.61828  |
| BB053232  | Gm944,KIAA4238,mKIAA4238                                | 3.22E-12 | 2.00191  |
| BE629676  | Gm885                                                   | 7.43E-14 | 6.99377  |
| BE690988  | Gm837                                                   | 0.00029  | 2.92188  |
| BG065026  | Gm784,Fndc3c,MGC100196,MGC100347                        | 6.44E-08 | 7.01642  |
| BG066456  | Gm542                                                   | 4.42E-28 | 5.44863  |
| BB527649  | Gm484                                                   | 0.00037  | 4.00109  |
| AI449447  | Gm1805,Gm407,Gm721,MGC102209                            | 0.00045  | 2.75607  |
| BB626288  | Gm1752,Gm611,MGC15606                                   | 0.00054  | 2.63191  |



|           |                                                           |          |          |
|-----------|-----------------------------------------------------------|----------|----------|
| BB213765  | Gm1126                                                    | 4.62E-06 | 4.881    |
| AK010388  | Glt8d1,AI450005,2410004H05Rik,5430414N14Rik               | 0.00003  | 1.77147  |
| BB207363  | Glis3,E230012L24,4833409N03Rik,E330013K21Rik              | 3.85E-09 | 4.86738  |
| BM208214  | Glipr2,C77180,GAPR-1,5730414A08Rik                        | 1.11E-06 | 4.32559  |
| BC025083  | Glipr1,RTVP1,RTVP-1,mRTVP-1,2410114O14Rik                 | 1.41E-28 | 6.8883   |
| AW546128  | Gli2,AW546128                                             | 2.31E-09 | 3.35417  |
| NM_010296 | Gli1,Zfp5,Zfp-5,AV235269                                  | 8.77E-04 | 2.34901  |
| BG074127  | Glg1,CFR,CFR-1,ESL-1,MG160,Selel,MG-160                   | 0.00092  | 1.71288  |
| NM_008122 | Gja7,Cx45,Cnx45,Gja-7,C130009G16Rik                       | 0.00006  | 1.72721  |
| NM_016975 | Gja3,Cx43,Cx46,Cnx46,Gja-3                                | 4.45E-06 | 4.19641  |
| M63801    | Gja1,Cx43,Npm1,Cnx43,Gja-1,AU042049,AW546267              | 1.58E-18 | 23.53074 |
| AW413620  | Gig1,C030026M03,C030034L19Rik                             | 0.00056  | 4.12069  |
| NM_011820 | Ggtla1,GGL,GGT-REL,AI551243                               | 4.48E-10 | 4.46967  |
| BC005772  | Ggtl3,MGC12004,1110017C11Rik,6330563L03Rik                | 0.00056  | 6.77908  |
| AI604259  | Ggps1,C79210,AI843169,1810026C22Rik,9530089B04Rik         | 5.66E-12 | 2.98704  |
| AV311526  | Ggcx                                                      | 0.00003  | 3.12492  |
| U10551    | Gem,AV020497                                              | 6.31E-06 | 3.18437  |
| NM_010275 | Gdnf,AI385739                                             | 0.00014  | 4.63767  |
| BF660710  | Gdi2,GDIB,Gdi3,GDI-B                                      | 4.26E-08 | 1.50703  |
| NM_020619 | Gcs1,AI181835,1810017N02Rik                               | 2.69E-06 | 2.1011   |
| BM239196  | Gcnt2,IGnT,IGnTA,IGnTB,IGnTC,5330430K10Rik                | 0        | 15.00056 |
| AK017462  | Gcnt1,IGnT,B130048E03,C2 GlnAct,5630400D21Rik             | 4.31E-06 | 3.00075  |
| BC019374  | Gclc,Glcl,GLCL-H,Ggcs-hs,D9Wsu168e                        | 4.47E-08 | 2.55044  |
| BM239632  | Gcl,mgcl-1,2810049L19Rik                                  | 0.00014  | 1.58441  |
| NM_008094 | Gba,GC,GBA1,GLUC,GCase                                    | 0.00001  | 1.76388  |
| AW108522  | Gatm,AT,AI314789,1810003P21Rik                            | 1.34E-28 | 13.1663  |
| NM_018855 | Gas8,Gas11                                                | 7.44E-07 | 4.70355  |
| AW547050  | Gas5,Gas-5,MGC6251                                        | 4.55E-06 | 3.05761  |
| BB770972  | Gas2l3,Gm240,8430435B07Rik                                | 0.00022  | 2.65987  |
| BB769886  | Gas2l1,GAR22,D0Jmb1,TU-71.1,RP23-64E17.7,4930500E24Rik    | 2.23E-18 | 3.46862  |
| AU067654  | Garnl4,Gm1561,AU067654,MGC130388                          | 1.79E-14 | 3.66755  |
| NM_008060 | Ganab,G2an,Glull,AU042638,mKIAA0088                       | 3.02E-24 | 3.07497  |
| NM_010254 | Galr2,mGalR                                               | 0.00024  | 5.25831  |
| AV238718  | Galnt4,BC024988,MGC32465,2900011G21Rik                    | 1.18E-10 | 3.23533  |
| BG064057  | Galnt2,AI480629                                           | 3.34E-22 | 1.75221  |
| BC021504  | Galnt11,AI648252,A430075I06Rik,E430002F06Rik              | 0.00069  | 1.93022  |
| BM217066  | Galnt1                                                    | 0.00002  | 1.71173  |
| BC004002  | Galns,FLJ00319,mFLJ00319                                  | 1.11E-06 | 2.09298  |
| BB771515  | Galk2,Gk2,AI327030,2810017M24Rik                          | 3.62E-12 | 2.67353  |
| NM_016905 | Galk1,Gk,Glk,GALK,Glk1,AA409894                           | 0.00007  | 3.02324  |
| U18975    | Galgt1,Ggm2,Ggm-2,GalNAct,GalNAct-T,GalNAct-T,            | 2.31E-11 | 16.6544  |
| BE310730  | Gak,MGC31204,D130045N16Rik                                | 0.00092  | 3.00303  |
| AK003937  | Gadl1,1110027M19Rik                                       | 1.31E-06 | 3.7396   |
| NM_007836 | Gadd45a,Ddit1,GADD45,AA545191                             | 3.06E-20 | 3.30953  |
| BQ177003  | Gabpb1,E4TF1,GABPB,BABPB2                                 | 0.00003  | 1.6882   |
| BG172318  | G630055P03Rik                                             | 3.76E-08 | 3.98163  |
| BM232738  | G630041M05Rik                                             | 0.00009  | 1.84392  |
| BM234433  | G431001E03Rik                                             | 1.43E-06 | 3.61439  |
| BG069073  | G430041M01Rik,AL022798                                    | 0.00001  | 1.5819   |
| AK019325  | G1p2,IP17,Irfp,UCRP,15kDa,IGI15,Isg15,MGC103144,MGC130321 | 0.00039  | 4.37772  |
| BB371406  | Fzd2,Fzd10,Mfz10,Mfz10a,AW456835                          | 1.35E-12 | 15.71632 |
| NM_021457 | Fzd1,FZ-1,AW227548                                        | 4.88E-07 | 3.62185  |
| AW909391  | Fyn,AI448320,AW552119,MGC115870                           | 0        | 3.11285  |
| AB032010  | Fxyd6,Php,0610030I18Rik                                   | 2.70E-11 | 4.54457  |
| NM_016893 | Fut8                                                      | 2.53E-16 | 2.20876  |
| AV264909  | Fut11,AI317183,3110009G03Rik                              | 0.00025  | 1.8099   |
| AF224264  | Fus,Tls,Fus1,D430004D17Rik,D930039C12Rik                  | 0.00038  | 2.66782  |
| BB488001  | Fubp1,FBP,Fubp,Fubp4,D3ErtD330e,9530027K12Rik             | 0.0001   | 4.71195  |
| NM_031380 | Fstl3,Fllrg,E030038F23Rik                                 | 0.00027  | 5.34014  |
| BI452727  | Fstl1,Fstl,TSC-36,AI316791,AW107808                       | 5.51E-06 | 2.32829  |
| NM_008046 | Fst                                                       | 1.85E-32 | 12.02255 |
| NM_007984 | Fscn1,Fan1,AI663989                                       | 1.91E-11 | 4.40685  |
| BM213356  | Frmpr1,BC031840,mKIAA0967                                 | 4.66E-06 | 15.76631 |
| BC019939  | Frmr6,AW212977,2610019M19Rik,4930488L10Rik                | 0.00001  | 1.80166  |
| BB099015  | Frmr3,4.1O,P410,EPB41L4O,9430066I12Rik                    | 6.34E-06 | 4.0604   |
| BB831042  | Frk,BSK,GTK,RAK,C85044,BSK/IYK                            | 0.00002  | 3.3331   |

|           |                                                            |          |          |
|-----------|------------------------------------------------------------|----------|----------|
| BE990928  | Freq,Ncs1,Mfreq,NCS-1,AI836659,9430075O15Rik,A730032G13Rik | 2.43E-12 | 7.05466  |
| BI452538  | Frem1                                                      | 1.52E-09 | 5.59795  |
| BB541392  | Fras1,bl,mKIAA1500,E130113P14Rik                           | 0.00005  | 2.97879  |
| AV009267  | Foxq1,sa,Hfh1,HFH-1,Hfh1l                                  | 1.42E-10 | 8.69741  |
| BG962849  | Foxp1,AI461938,AW494214,3110052D19Rik,4932443N09Rik        | 0.00006  | 3.34531  |
| AV221013  | Foxn2,HTLF,Fkh19,Foxn1,3230402J05Rik,6030465J18Rik         | 1.31E-08 | 1.66611  |
| NM_010225 | Foxf2,LUN,Fkh20,FREAC2                                     | 2.93E-22 | 14.33202 |
| BB437522  | Foxf1a,Hfh8,Foxf1,HFH-8,FREAC1,Freac-1,AI450827            | 0        | 14.14466 |
| NM_013519 | Foxc2,Mfh1,Fkh14,MFH-1,Hfhbf3                              | 9.40E-11 | 12.11644 |
| BM245170  | Fosl2,Fra-2                                                | 0.00031  | 2.1133   |
| BG245669  | Folr1,FBP1,Folbp1,Folbp-1                                  | 3.27E-08 | 3.03713  |
| AK013203  | Fndc4,FRCP1,Fnmp1                                          | 1.34E-07 | 4.94418  |
| BG067230  | Fndc3b,Fad104,AW550168,KIAA4164,mKIAA4164,1600019O04Rik    | 1.99E-16 | 12.47713 |
| BC022140  | Fndc3a,Fndc3,D14Etd453e,1700094E19Rik,F730017H24Rik        | 8.91E-08 | 2.75767  |
| BG064340  | Fnbp3,FBP11,Fnbp11,2810012K09Rik                           | 0.00005  | 2.3931   |
| AW548221  | Fnbp1l,TOCA1,AW548221,MGC30506,2610318I01Rik               | 2.13E-13 | 1.81477  |
| BM234360  | Fn1,Fn,Fn-1,MGC117493,E330027I09                           | 1.37E-10 | 5.06037  |
| BB138853  | Fmnl3,Wbp3,FBP11,mKIAA2014,2700073B04Rik                   | 0.00001  | 2.23049  |
| BB817332  | Flrt2                                                      | 9.79E-11 | 3.75249  |
| AW538200  | Flnb,AL024016                                              | 8.41E-06 | 2.20779  |
| BM233746  | Flna,Fln1,ABP-280,F730004A14Rik                            | 8.96E-20 | 3.00431  |
| AF279263  | Fkbp9,FKBP60,FKBP63,AW549641,1810014L23                    | 4.53E-16 | 1.79928  |
| NM_010222 | Fkbp7,23kDa,FKBP23                                         | 4.67E-08 | 2.37025  |
| NM_008020 | Fkbp2,13kDa,mFKBP2,mFKBP13                                 | 0.00001  | 1.8077   |
| NM_024169 | Fkbp11,1110002O23Rik                                       | 4.87E-08 | 2.45909  |
| NM_010221 | Fkbp10,65kDa,Fkbp6,FKBP65,AI325255,Fkbp-rs1,Fkbp1-rs       | 7.68E-31 | 26.20703 |
| AV230815  | Fjx1                                                       | 0.00027  | 5.52412  |
| BM204835  | Fip1l1,Rje,1300019H17Rik                                   | 0.00047  | 2.45705  |
| NM_021891 | Figl1                                                      | 0.00025  | 7.08697  |
| NM_010212 | Fhl2,SLIM3,C76204                                          | 4.59E-22 | 9.60371  |
| BG873440  | Fgfr2,Bek,Fgfr7,Fgfr-2,Fgfr-7,KGFRTr,AU043015,             | 5.87E-10 | 6.83771  |
| AW046863  | Fgf9                                                       | 1.04E-34 | 9.82613  |
| NM_008008 | Fgf7,Kgf                                                   | 2.10E-15 | 4.15183  |
| NM_053072 | Fgd6,Etohd4,ZFYVE24,AA123052                               | 0.00002  | 3.07455  |
| BC011462  | Fgd1,ZFYVE3                                                | 0.00005  | 2.70557  |
| NM_021564 | Fetub,Gugu,D17980,AI255764,2310011O17Rik                   | 0.00011  | 3.57538  |
| NM_008000 | Fert2,Fer,Fert,AV082135,C330004K01Rik                      | 5.60E-09 | 2.91458  |
| BI555209  | Fer1l3,2310004N10Rik,2310051D19Rik,E030042N20Rik           | 6.42E-38 | 19.73226 |
| NM_010188 | Fcgr3,CD16                                                 | 0.00015  | 2.84264  |
| M14216    | Fcgr2b,CD32,Fcgr2,                                         | 9.85E-06 | 3.31498  |
| AF143181  | Fcgr1,CD64,IGGHAFc,AI323638,AV092959,FcgammarI             | 4.76E-21 | 5.63344  |
| BF455337  | Fbxo4,AI851261,AW494535,1700096C12Rik                      | 0.00004  | 2.06443  |
| BE914442  | Fbxo38,Moka,SP329,AU044865,AW214031,6030410I24Rik          | 8.43E-06 | 1.6931   |
| AK006369  | Fbxo30,1700026A16Rik                                       | 2.78E-19 | 2.3982   |
| AK013142  | Fbxl2,Fbl3,2810423A21Rik                                   | 2.40E-14 | 9.49028  |
| NM_010181 | Fbn2,sy,sne,Fib-2,BC063774,KIAA4226,mKIAA4226              | 0        | 44.06173 |
| AF007248  | Fbn1,Tsk,Fib-1,AI536462,B430209H23                         | 0.00002  | 2.2305   |
| NM_011812 | Fbln5,A55,EVEC,DANCE                                       | 1.54E-07 | 2.3251   |
| BC007140  | Fbln1                                                      | 0.00032  | 5.78176  |
| BG070068  | Fblim1,Cal,Gt10,2410043F08Rik                              | 8.95E-16 | 15.41426 |
| NM_007990 | Fau,MNSFbeta                                               | 3.53E-11 | 1.75274  |
| AV088463  | Fath,Fat1,mFat1,AU023433,2310038E12Rik                     | 5.77E-17 | 5.12122  |
| BE652876  | Fads3,AI464531                                             | 2.07E-08 | 6.49133  |
| BB277583  | Fads1,DSD,AI317215,MGC37858,0710001O03Rik,A930006B21Rik    | 0.00084  | 2.12636  |
| NM_021272 | Fabp7,MRG,BIbp,B-FABP                                      | 1.54E-08 | 9.86165  |
| BB327547  | F730031O20Rik                                              | 0.00099  | 4.33301  |
| BB042422  | F730008N07Rik,                                             | 0.00019  | 1.63705  |
| BC024886  | F3,TF,Cf3,Cf-3,CD142,AA409063                              | 0        | 11.20216 |
| NM_007974 | F2r1,Par2,PAR-2,Gpcr11                                     | 0.00005  | 8.53807  |
| AV024285  | F2r,Cf2r,Par1,ThrR,AI482343,MGC28086                       | 9.95E-39 | 10.03393 |
| NM_010168 | F2,Cf2,Fil,Cf-2                                            | 2.14E-11 | 7.21262  |
| BC021876  | F11r,JAM,Jcam,JAM-1,JAM-A,Jcam1,                           | 0.00066  | 1.7158   |
| BC003755  | Eya2,AI327163                                              | 0.00056  | 2.98568  |
| BG071142  | Extl3,Extl1,AU040105,KIAA0519,mKIAA0519,2900009G18Rik      | 2.16E-08 | 2.57776  |
| NM_010162 | Ext1,AA409028                                              | 0.00004  | 2.2878   |
| BC024423  | Exosc1,AI447561,2610035C18Rik,2610104C07Rik,2610312F07Rik  | 0.00008  | 1.61355  |

|           |                                                          |          |          |
|-----------|----------------------------------------------------------|----------|----------|
| AK010620  | Exoc2,Sec5,Sec5l1,AI648199,2410030I24Rik,RP23-213G18.3   | 0.00009  | 1.61711  |
| NM_007965 | Evi,AI528774                                             | 0.00022  | 2.56987  |
| AI255184  | Evi5,NB4S                                                | 5.44E-08 | 1.83788  |
| AK003461  | Etv5,ERM,1110005E01Rik,8430401F14Rik                     | 0.00001  | 2.33671  |
| BI901633  | Etv1,ER81,Etsrp81                                        | 2.60E-13 | 6.78542  |
| BB151715  | Ets1,Tpl1,Ets-1,MGC18571,p42Ets-1,p51Ets-1               | 0.00013  | 1.54531  |
| NM_007956 | Esr1,ERa,ESR,Estr,ER[a],Estra,Nr3a1,ERalpha,             | 0.00006  | 21.81222 |
| BC020038  | Esm1,ESM-1,AV004503,0610042H23Rik                        | 9.13E-23 | 27.83684 |
| NM_016903 | Esd,Es10,Es-10,sid478                                    | 1.41E-13 | 2.11657  |
| AK013303  | Erp29,Erp28,Erp31,PDI-Db,AW209030                        | 9.55E-17 | 2.17117  |
| BB071632  | Erh,Mer,Prei1,MGC103398,MGC130271,MGC130272              | 4.42E-10 | 2.55784  |
| NM_007950 | Ereg,MGC36144                                            | 2.64E-07 | 13.63502 |
| BF140685  | ErbB3,Her3,C76256,ErbB-3,ErbB3r,MGC117742                | 0.00002  | 3.41374  |
| BC028256  | ErbB2ip,ErbIn,mKIAA1225,1700028E05Rik                    | 6.34E-09 | 2.13685  |
| BC027080  | ErbB2,Neu,HER2,HER-2,c-neu,ErbB-2,c-erbB2,mKIAA3023      | 0.00021  | 2.68945  |
| NM_007680 | Ephb6,Mep,Cekl                                           | 0.00016  | 4.11174  |
| BC014822  | Ephb3,EtK2,HEK2,MDK5,Sek4,Cek10,Tyro6,AW456895           | 5.20E-16 | 13.45781 |
| BE553881  | Epha5,bsk,Cek7,Ehk1,Els1,Hek7,Rek7,AI854630              | 0.0003   | 1.64382  |
| M68513    | Epha3,Hek,Cek4,ETK1,End3,Hek4,Mek4,Tyro4,AW492086        | 5.50E-29 | 21.86194 |
| BB873170  | Entpd7,LALP1,Lysal2,1810012B13Rik                        | 0.00028  | 3.0404   |
| BI151440  | Entpd1,Cd39,AA408691,NTPDase-1,2610206B08Rik             | 2.66E-22 | 7.80058  |
| C76301    | Enpp1,Pca,tw,twy,M6S1,NPP1,Npps,PC-1,Ly-41,Pca-1         | 4.27E-10 | 3.75867  |
| NM_013509 | Eno2,NSE,Eno-2,AI837106,D6Etd375e                        | 0.00026  | 3.57985  |
| AK018588  | Eng,CD105,AI528660,S-endoglin                            | 0.00035  | 1.72617  |
| BM120053  | Enc1,Nrpb,PIG10                                          | 9.92E-27 | 20.09614 |
| AV329519  | Enah,Mena,WBP8,Ndpp1,AI464316,AW045240                   | 0.00001  | 2.25425  |
| BC001999  | Emp3,H4,H-4,Ymp,MI-35,HNMP-1                             | 4.20E-09 | 2.8857   |
| AF083876  | Emp2,XMP                                                 | 1.01E-14 | 11.24832 |
| U25633    | Emp1,TMP                                                 | 0.00015  | 2.14553  |
| NM_133918 | Emilin1,gp115,AW229038,BB105748,EMILIN-1,5830419M17Rik   | 1.41E-21 | 51.39017 |
| BC002218  | Emid2,Emu2,Col26a,Col26a1,MGC7475,BC002218,9430032K24Rik | 0.00006  | 4.11586  |
| NM_080595 | Emid1,CO-5,Emu1,AW122071,RP23-338J18.3                   | 0.00003  | 3.09591  |
| AB034693  | Emcn,Muc14,AI315669,0610012K22Rik                        | 8.23E-06 | 1.92759  |
| BG064842  | Emb,Gp70,AL022799,MGC21425                               | 5.70E-35 | 10.0476  |
| BB338945  | Elov17,AI840082,9130013K24Rik                            | 1.94E-06 | 2.31656  |
| BB748075  | Elov1,Ssc1,AA407424,BB151133                             | 2.96E-14 | 3.33547  |
| BM118719  | Elk3,Erp,Net,Etrp,Sap-2,D430049E23Rik                    | 0.00038  | 2.82647  |
| BF320852  | Eif4a1,Eif4,Ddx2a,BM-010                                 | 1.97E-23 | 2.52372  |
| NM_018749 | Eif3s7,eIF3p66,66/67kDa,AA407891,MGC115774               | 3.22E-06 | 1.65055  |
| BC024463  | Eif3s6ip,PAF67,HSP-66Y,MGC37328,0610011H21Rik            | 2.80E-13 | 1.64444  |
| AW701127  | Eif3s10,Csma,Eif3,mKIAA0139,A830012B05Rik                | 1.31E-07 | 10.47412 |
| AV122850  | Eif2s3y,Spy,Tfy,Eif-2gy                                  | 0.00049  | 2.85609  |
| NM_010121 | Eif2ak3,PEK,perk,AI427929                                | 0.00017  | 1.7081   |
| BM200591  | Eif1a,Ef1a,Eftu,Eif4c,C76390,eIF-1A                      | 8.23E-11 | 3.05249  |
| BM200591  | Eif1a,Ef1a,Eftu,Eif4c,C76390,eIF-1A                      | 1.97E-10 | 2.81062  |
| BM234719  | Ehd3,Ehd2                                                | 3.31E-17 | 6.1104   |
| AV346607  | Egr3,Pilot,MGC124006,MGC124009                           | 1.72E-15 | 7.25578  |
| X06746    | Egr2,Egr-2,Zfp-6,Krox20,NGF1-B,Zfp-25,Krox-20            | 1.47E-06 | 4.04278  |
| BB284358  | Egln3,SM-20,AI505553,AI648162,2610021G09Rik              | 2.08E-08 | 3.89479  |
| BB315355  | Eftud2,116kDa,Snrp116,U5-116kD                           | 7.38E-07 | 2.15297  |
| NM_010112 | Efs                                                      | 1.59E-10 | 4.34237  |
| AK007560  | Efhd2,AA408606,D4Wsu27e,2600015J22Rik                    | 1.08E-06 | 4.03149  |
| AA409309  | Efhd2,AA408606,D4Wsu27e,2600015J22Rik                    | 3.56E-12 | 3.45676  |
| BQ176617  | Efha1,Smhs2,AU041871,1110008L20Rik,4833427E09Rik         | 2.29E-10 | 2.05826  |
| NM_021474 | Efemp2,MBP1,0610011K11Rik                                | 5.65E-10 | 3.65934  |
| BC018223  | Eef1a1,MGC7551,MGC8115,                                  | 1.06E-10 | 1.58558  |
| AW558570  | Ednra,ETa,ET-AR,Gpcr10                                   | 0        | 20.33941 |
| BB377340  | Edil3,Del1                                               | 0.0001   | 5.33595  |
| NM_022983 | Edg7,lpA3                                                | 0.00008  | 3.86794  |
| AV310929  | Edg5,H218,LPb2,S1P2,Gpcr13,1100001A16Rik                 | 8.56E-06 | 4.29513  |
| U48235    | Edd2,Kdt2,lpA1,vzg-1,Gpcr26,AI326300,MGC29102,5031439C20 | 5.81E-06 | 2.42464  |
| BG073486  | Edd1,Edd,C77315,AW549941                                 | 2.76E-09 | 1.66433  |
| AV246296  | Eda2r,Xedar,TNFRSF27,MGC124099,9430060M22Rik             | 1.13E-25 | 12.70118 |
| NM_007900 | Ect2,AI528536,KIAA4037,mKIAA4037                         | 0.00029  | 4.39112  |
| NM_007899 | Ecm1,p85,AI663821                                        | 5.98E-09 | 6.15286  |
| AW553715  | Ece1,ECE-1a,ECE-1b,ECE-1d,AW322500                       | 8.44E-06 | 1.96325  |

|           |                                                               |          |          |
|-----------|---------------------------------------------------------------|----------|----------|
| NM_007898 | Ebp,Td,mSI,Pabp,AI255399                                      | 0.00008  | 1.69934  |
| BM242490  | Ebi2                                                          | 0.00033  | 5.72959  |
| BC010442  | E430018J23Rik,AI480612                                        | 4.19E-12 | 5.77114  |
| BM119343  | E430012K20Rik,AI662170,KIAA1223,mKIAA1223,mKIAA3019           | 3.33E-11 | 3.25662  |
| BB555250  | E330018D03Rik,FLJ10126                                        | 0.00086  | 2.09115  |
| BM247465  | E2f8,AA410048,4432406C08Rik                                   | 1.51E-12 | 8.42789  |
| BB543028  | E2f2,E130207A07                                               | 2.66E-14 | 6.4448   |
| BB308071  | E130306M17Rik                                                 | 1.46E-10 | 8.06534  |
| BF464487  | E130114P18Rik                                                 | 0.00003  | 5.8971   |
| BG066858  | E030041M21Rik,                                                | 2.12E-09 | 2.18615  |
| BB794845  | E030018N11Rik                                                 | 6.84E-18 | 3.9868   |
| BB529627  | E030003F13Rik,AI450814                                        | 1.72E-17 | 3.79214  |
| NM_019682 | Dynll1,Pin,DLC8,Dncl1                                         | 0        | 2.46683  |
| AK008822  | Dync2li1,LIC3,D2lic,CGLI-60,mD2LIC                            | 0.00008  | 1.59932  |
| BM212035  | Dync1li2,LIC2,Dncli2,Dncli2,AA409702,C920003I06               | 8.93E-14 | 1.92495  |
| BC023347  | Dync1li1,LIC-1,Dncli1,MGC32416,1110053F02Rik                  | 1.10E-15 | 2.21515  |
| NM_010063 | Dync1i1,DIC,IC74,Dncic1                                       | 0.00023  | 6.04253  |
| NM_030238 | Dync1h1,Loa,P22,DHC1,DNCL,DHC1a,Dnec1,                        | 3.55E-07 | 1.65359  |
| NM_026268 | Dusp6,MKP3,MKP-3,PYST1,MGC98540,1300019I03Rik                 | 5.67E-06 | 2.56505  |
| AK012530  | Dusp4,AI844617,BB104621,2700078F24Rik,E130306H24Rik           | 0.00018  | 2.63735  |
| L11330    | Dusp2,PAC1                                                    | 4.44E-09 | 6.35595  |
| AK009744  | Dusp14,Mkp6,MKP-L,D11Ert395e,1110014C10Rik,2310042C07Rik      | 4.20E-45 | 14.92894 |
| BE951717  | Dusp11,AI481497,2010300F21Rik                                 | 0.00025  | 1.71846  |
| BB218727  | Dus2l,2310016K04Rik                                           | 0.00054  | 3.08794  |
| AW122183  | Dtx4,RNF155,AI449438,BC044798,D930042H13                      | 6.49E-06 | 2.79568  |
| AV270035  | Dtl,Ramp,2810047L02Rik,5730564G15Rik                          | 0.00031  | 5.66063  |
| NM_019771 | Dstn,ADF,Dsn,com1,sid23p,AU042046,2610043P17Rik               | 3.27E-12 | 1.84287  |
| NM_134448 | Dst,ah,dt,Bpag,BP230,Bpag1,Macf2,                             | 8.26E-07 | 6.14551  |
| NM_007834 | Dscr3,Dcra,MGC5833,AW538125                                   | 4.93E-11 | 1.94609  |
| AW495265  | Drp2,AW495265                                                 | 6.28E-14 | 7.18071  |
| NM_053090 | Drctnbn1a                                                     | 0.00092  | 1.77841  |
| NM_009468 | Dpysl3,TUC4,Ulip,Ulip1,CRMP-4                                 | 6.18E-28 | 8.36032  |
| BE949451  | Dpy19l1,AI225861,AW558481,6030402K12,1100001I19Rik            | 5.49E-07 | 2.80734  |
| NM_133803 | Dpp3,C86324,4930533O14Rik                                     | 0.0002   | 1.72083  |
| AV341904  | Dok4                                                          | 0.00002  | 4.6281   |
| BC013066  | Dok1,p62DOK,AW557123                                          | 0.00023  | 2.06027  |
| NM_026082 | Dock7,Gm430,mKIAA1771,3110056M06Rik                           | 0.00005  | 2.93168  |
| BG065288  | Doc2a                                                         | 0.00098  | 2.39443  |
| BB542096  | Dnm3os,Hag2,Npn1,P/L01,6030416H16Rik,neoplastic progression 1 | 0        | 17.26858 |
| BB038556  | Dner,BET,Bret,MGC39059,A930026D19Rik                          | 4.15E-10 | 21.68896 |
| AK003892  | Dnajc8,AL024084,AU019262,AU044514                             | 3.56E-08 | 2.02315  |
| BB108239  | Dnajc5,Csp,AU018536,2610314I24Rik                             | 1.34E-09 | 1.80076  |
| BE624323  | Dnajc3,p58,mp58,Prkri,AA408985,AU067833                       | 2.80E-07 | 3.62638  |
| AV114239  | Dnajc10,JPDI,ERdj5,D2Ert395e,1200006L06Rik                    | 3.29E-13 | 1.80628  |
| BM240862  | Dnajc1,MTJ1,ERdj1,Dnajl1,AA960110,                            | 0.0005   | 1.5764   |
| AI552982  | Dnajb9,Mdg1,mDj7,ERdj4,AA408011                               | 4.04E-11 | 6.39465  |
| AK010861  | Dnajb11,Dj9,ABBP-2,AL024055,1810031F23Rik                     | 4.35E-06 | 1.92426  |
| AK002290  | Dnajb1,HSPF1,Hsp40,0610007I11Rik                              | 0.00015  | 1.68417  |
| BB698273  | Dmwd,59,Dm9,DMR-N9,MGC37679,MGC115779                         | 0.00033  | 5.43141  |
| BB357590  | Dmtf1,Dimp,Dmp1                                               | 3.36E-06 | 3.2132   |
| U65020    | Dmp1,PP,Dmp,AV020965                                          | 3.43E-08 | 8.51088  |
| U79738    | Dlx3,Dlx-3,AV237891                                           | 5.55E-08 | 3.50157  |
| NM_010052 | Dlk1,FA1,ZOG,pG2,Peg9,SCP1,Ly107,pref-1,AW742678              | 0        | 29.47471 |
| NM_016747 | Dlgh3,DLG3,SAP102,mKIAA1232                                   | 8.93E-21 | 3.95421  |
| BB622767  | Dlgh2,PSD93,Gm1197,A330103J02Rik,B330007M19Rik                | 0.00007  | 2.85508  |
| BG066219  | Dlgap4,DAP4,WBP16,                                            | 9.98E-06 | 1.90401  |
| BC021314  | Dlg5,T25557,mKIAA0583,4933429D20Rik                           | 3.83E-11 | 2.26553  |
| AK004853  | Dkk3,C87148,AW061014                                          | 0.00007  | 5.23396  |
| AF177196  | Dio2,AI324267                                                 | 1.59E-09 | 3.18658  |
| Y15910    | Diap2,DIA3,E430022I22Rik                                      | 0.00008  | 3.67212  |
| U91922    | Dhx9,RHA,Ddx9,NDHII,NDH II,AI326842,MGC90954                  | 0.00004  | 2.85035  |
| BB397009  | Dhx29,Ddxx,AU043276,3732415M03,E130202M19Rik                  | 0.00053  | 2.19522  |
| BC003745  | Dhx15,DBP1,HRH2,Ddx15,mDEAH9,MGC117685                        | 2.59E-18 | 1.6169   |
| BG295389  | Dhcr24,mKIAA0018,2310076D10Rik,5830417J06Rik                  | 0.00012  | 4.4144   |
| AI646503  | Dgkg,90kDa,Dagk3,                                             | 0.00001  | 5.17158  |
| BB523554  | Dgcr8,Gy1,N41,D16Wis2,D16H22S788E,D16H22S1742E                | 0.00051  | 2.23264  |

|           |                                                      |          |          |
|-----------|------------------------------------------------------|----------|----------|
| BB523554  | Dgcr8,Gy1,N41,D16Wis2,D16H22S788E,D16H22S1742E       | 0.00001  | 1.61949  |
| NM_018769 | Dfna5h,DFNA5,2310037D07Rik,4932441K13Rik             | 2.06E-06 | 7.0241   |
| NM_033562 | Derl2,Flana,F-lana,CGI-101,BC005682                  | 7.43E-06 | 1.77014  |
| BC005799  | Depdc1a,Depdc1,5830484J08Rik                         | 0.0003   | 6.44204  |
| AV260555  | Dennd2a,mKIAA1277,C130031G22,B930096L08Rik           | 0.0004   | 1.94376  |
| AV286991  | Degs1,Degs,Des1,Mdes,AA536663                        | 1.82E-19 | 1.88992  |
| BG063981  | Ddx58,RIG-I,C330021E21,6430573D20Rik                 | 0.0002   | 1.98442  |
| BB224909  | Ddx50,GU2,RH-II,4933429B04Rik                        | 3.08E-07 | 2.35292  |
| AA210261  | Ddx3y,Dby,D1Pas1-rs1,8030469F12Rik                   | 0        | 36.45127 |
| AV111502  | Ddx39,BAT1,DDXL,URH49,2610307C23Rik                  | 8.16E-07 | 1.62988  |
| BB401872  | Ddx31,Gm997,5830444G11Rik                            | 0.00017  | 3.15793  |
| BC011321  | Ddx27,C86129                                         | 0.00006  | 2.40721  |
| BB381966  | Ddx26,HDB,DICE1,Notch2l,AI480962,2900075H24Rik       | 2.86E-18 | 6.12753  |
| BB476615  | Ddx17,Gm926,                                         | 0.00017  | 1.56157  |
| BF225985  | Ddr1,Cak,Nep,PTK3A,CD167a,AI323681,6030432F18        | 1.03E-08 | 5.68369  |
| NM_007838 | Ddost                                                | 0.00016  | 1.66577  |
| AF071068  | Ddc,Aadc                                             | 0.00019  | 3.34259  |
| NM_015735 | Ddb1,127kDa,AA408517,p127-Ddb1                       | 2.34E-09 | 2.37403  |
| BB770857  | Ddah1,AI987801,AW050362,2410006N07Rik,2510015N06Rik  | 0.00017  | 3.96927  |
| BB418548  | Dcx,Dbct                                             | 3.76E-13 | 32.71583 |
| BQ176904  | Dcun1d4,AI836376,MGC117952                           | 8.72E-07 | 3.50805  |
| AK017809  | Dcp2,2410015D23Rik,5730537H01Rik                     | 0.00095  | 3.7378   |
| AK014521  | Dcblid1,4631413K11Rik                                | 0.00002  | 3.80239  |
| AW105916  | Dcamk1,DCLK,Cpg16,mKIAA0369,1700113D08Rik            | 0        | 35.16696 |
| AV328035  | Dbnl,Abp1,SH3P7,mAbp1                                | 1.02E-07 | 2.22276  |
| AF187147  | Dbn1                                                 | 4.40E-07 | 3.98251  |
| BC022165  | Dapk2                                                | 1.11E-06 | 1.76697  |
| BC024876  | Dap,MGC6998,AI789753,AU040360,MGC19154,4921531N22Rik | 3.33E-09 | 3.13911  |
| BB374930  | Dach1,Dac,Dach,AI182278,E130112M23Rik                | 0.00001  | 3.49647  |
| AK017619  | Dab2,p96,Doc2,Doc-2,AA960054,AI957090                | 0.00045  | 3.44079  |
| BC025514  | D9Ucla1,D130038B21Rik                                | 0.00009  | 2.98983  |
| BQ175713  | D930050A07Rik                                        | 0.00003  | 6.02017  |
| BM195829  | D8ErtD82e,FLJ00269,MGC100334,mFLJ00269,9830148H23    | 1.23E-06 | 3.59966  |
| BG068292  | D8ErtD594e,C85457,AU022508,5330431C14Rik             | 3.71E-13 | 2.64097  |
| AI480533  | D7Wsu130e                                            | 0.0006   | 1.90857  |
| BC011313  | D7Wsu128e,Ubph,AI467302,D7Wsu105e                    | 0.00034  | 1.63211  |
| AK016470  | D6Wsu176e,Fam3c                                      | 1.58E-06 | 2.43993  |
| BB503633  | D630044F24Rik,Gm1114,MGC106805                       | 0.00032  | 4.51714  |
| AK011230  | D4st1,2600016L03Rik                                  | 0.0005   | 2.35132  |
| BF321707  | D3Wsu161e                                            | 0.0002   | 2.09144  |
| BF658806  | D3Ucla1,RAMP4,Serp1                                  | 1.83E-14 | 2.18391  |
| BF658806  | D3Ucla1,RAMP4,Serp1                                  | 0.00004  | 1.58325  |
| NM_019995 | D3ErtD300e,AA667204                                  | 3.44E-12 | 9.56643  |
| BB449568  | D330027G24Rik                                        | 2.34E-06 | 3.64726  |
| BB098407  | D330017J20Rik,FAM40B,mKIAA1170                       | 2.78E-07 | 5.61311  |
| AK016563  | D2ErtD435e,76p,MGC28085,4932441P04Rik                | 0.00002  | 2.21732  |
| BM238456  | D230040A04Rik                                        | 0.00002  | 3.773    |
| BB468551  | D230019N24Rik                                        | 0.00096  | 1.9154   |
| BB466171  | D230007K08Rik,CLR16.2,FLJ00348,mFLJ00348             | 8.65E-06 | 4.35432  |
| BB386177  | D230005D02Rik,B230207J08                             | 0.00005  | 2.39925  |
| BG070219  | D1ErtD646e                                           | 0.00099  | 2.23569  |
| AK006466  | D1Bwg1363e,AI414328,1700028N03Rik                    | 7.94E-07 | 2.40945  |
| AI314709  | D19Bwg1357e,AA675048,KIAA0020,1110069H02Rik          | 3.14E-11 | 2.50642  |
| BQ032363  | D18ErtD653e,C18orf1,A430083H02,                      | 0.00004  | 4.53806  |
| AV116987  | D17ErtD441e,Hn1l,AL022629,AY358078,                  | 0.0002   | 1.84916  |
| AK009258  | D16ErtD472e,AI256766,AW536354,                       | 5.11E-26 | 5.032    |
| AF096898  | D15Mit260,260,D15N2e,MIRab13                         | 8.28E-06 | 2.73625  |
| BM235412  | D15ErtD621e,AV220772,BC033609,MGC40987,mKIAA0493     | 1.53E-12 | 3.0307   |
| AV114522  | D15ErtD366e,Eplin,1110021C24Rik,3526402A12Rik        | 3.59E-14 | 3.65778  |
| AK008216  | D130073L02Rik,Gm64,C10orf42,2010012O16Rik            | 4.93E-06 | 1.95045  |
| BQ176320  | D130072O21Rik,C86528,AI662855                        | 0.00014  | 1.75036  |
| BI102044  | D12ErtD551e,CHR2SYT,KIAA1228,2410017M09Rik           | 7.81E-08 | 1.5732   |
| BC027266  | D11Moh35,AW049199,C030047H17Rik                      | 9.50E-14 | 3.57663  |
| AV025581  | D10Wsu102e,AI747614,C430041118Rik                    | 7.26E-09 | 2.86676  |
| AK005026  | D10Ucla1,Reep3                                       | 0.00026  | 3.78305  |
| AU014694  | D10ErtD610e,GEFT,2410008H17Rik                       | 5.34E-08 | 1.684    |

|           |                                                                  |          |          |
|-----------|------------------------------------------------------------------|----------|----------|
| BE949414  | D10Ert438e,MGC7199,AU019165,AW538011,BC003223,                   | 0.00012  | 1.59254  |
| BF682730  | D030029J20Rik,AW111866                                           | 0.00027  | 1.8432   |
| NM_010516 | Cyr61,CCN1,Igfbp10,AI325051                                      | 0.00015  | 1.96953  |
| NM_007825 | Cyp7b1,hct-1,AW261589,D3Ert4552e                                 | 5.83E-13 | 2.87329  |
| AK009445  | Cyp4f16,AI746515,2310021J05Rik                                   | 1.59E-09 | 11.73031 |
| AB039380  | Cyp3a44                                                          | 0.00014  | 2.04408  |
| AK020848  | Cyp20a1,Cypm,A930011N14Rik                                       | 0.00081  | 2.58715  |
| BI251808  | Cyp1b1,CP1B,P4501b1                                              | 0.00033  | 3.07163  |
| BM119209  | Cyld,EAC,CDMT,CYLD1,mKIAA0849,2010013M14Rik                      | 2.17E-06 | 3.69766  |
| NM_011370 | Cyfp1,Shyc,Sra-1,KIAA0068,P140SRA-1                              | 1.28E-14 | 1.8037   |
| BE945607  | Cybrd1,Dcytb,2210407P13Rik                                       | 1.93E-09 | 8.25112  |
| NM_007807 | Cybb,Cgd,Nox2,C88302,gp91phox,gp91<phox>                         | 9.43E-06 | 2.7775   |
| AK018713  | Cyba,b558                                                        | 1.29E-07 | 2.00394  |
| AF332060  | Cyb5r3,Dia1,Dia-1,C85115,0610016L08Rik,2500002N19Rik             | 0.00071  | 6.21187  |
| NM_019720 | Cyb561d2,Tsp10,AW049681                                          | 7.43E-08 | 2.2089   |
| NM_030712 | Cxcr6,BONZO,STRL33,BB217514,BONZO-like                           | 1.35E-06 | 6.32495  |
| D87747    | Cxcr4,CD184,LESTR,Cmkar4,PB-CKR,PBSF/SDF-1                       | 2.63E-39 | 4.94348  |
| BC019961  | Cxcl16,SR-PSOX,AV290116,BB024863,0910001K24Rik                   | 2.14E-06 | 5.5295   |
| AF252873  | Cxcl14,KS1,Kec,BMAC,BRAK,NJAC,MIP-2g,Scyb14,                     | 2.07E-09 | 2.51955  |
| BC012653  | Cx3cr1                                                           | 4.20E-31 | 26.39593 |
| AA023906  | Cutl1,CDP,Cux,Cux1,                                              | 2.23E-08 | 3.64448  |
| NM_025611 | Cul7,p185,p193,AA409809,2510004L20Rik,C230011P08Rik              | 1.59E-11 | 3.74568  |
| BM241206  | Cugbp2,ETR-3,Napor,C88023,Napor-2,B230345P09Rik                  | 0.0002   | 2.47298  |
| BI652465  | Cttnbp2nl,MGC7720,AA552995,                                      | 1.58E-07 | 3.14113  |
| BC011434  | Cttn,Ems1,1110020L01Rik                                          | 7.41E-20 | 2.87562  |
| NM_022325 | Ctsz,CTSX,AI787083,AU019819,D2Wsu143e                            | 0        | 2.34603  |
| NM_021281 | Ctss                                                             | 0.00009  | 3.22472  |
| J02583    | Ctsl,fs,MEP,nkt,1190035F06Rik                                    | 3.18E-15 | 1.57841  |
| NM_007802 | Ctsk,Ms10q,MMS10-Q,AI323530                                      | 9.70E-06 | 3.25567  |
| BF580235  | Ctse,CE,CatE,A430072O03Rik,C920004C08Rik                         | 2.07E-06 | 7.52053  |
| NM_009982 | Ctsc,DPP1,DPPI,AI047818                                          | 3.18E-06 | 1.88853  |
| NM_016748 | Ctps                                                             | 6.42E-13 | 3.03179  |
| NM_007615 | Ctnnd1,P120,Catns,Ctnnd,AA409437,AU019353,mKIAA0384              | 1.85E-08 | 2.98517  |
| NM_007614 | Ctnnb1,Mesc,Catnb                                                | 0.00047  | 1.51894  |
| BG066669  | Ctnna1,Catna1,AA517462,AI988031                                  | 7.56E-08 | 3.82376  |
| NM_007796 | Ctla2a,Ctla-2a                                                   | 0.00051  | 1.84434  |
| AK003674  | Cthrc1,1110014B07Rik                                             | 4.03E-13 | 44.50333 |
| NM_010217 | Ctgf,Hcs24,Fisp12,fisp-12                                        | 4.20E-45 | 12.01685 |
| BG070878  | Ctdspl2,D2Ert485e                                                | 0.00011  | 2.38594  |
| AK016213  | Ctdp1,AW553592,4930563P03Rik                                     | 3.78E-11 | 2.3492   |
| BC003241  | Cstf3,C79532,MGC6373,4732468G05Rik                               | 5.91E-08 | 2.33407  |
| BM120662  | Cstf2,64kDa,Cstf64,C630034J23Rik                                 | 0.00079  | 1.69972  |
| NM_007793 | Cstb,Stfb,AA960480                                               | 2.88E-07 | 2.04371  |
| AK003744  | Cst6,ichq,N28197,1110017E11Rik                                   | 5.73E-09 | 3.85803  |
| NM_013808 | Csrp3,MLP,CRP3,MMLP                                              | 0.00001  | 4.53863  |
| BF124540  | Csrp1,CRP1,Csrp,AA408841,AA959891,AW545626                       | 0.00002  | 3.29778  |
| BB377873  | Cspg4,AN2,NG2,4732461B14Rik                                      | 7.70E-11 | 4.60767  |
| BM251152  | Cspg2,NG2,hdf,PG-M(V0),PG-M(V1)                                  | 6.51E-31 | 12.13044 |
| BG070990  | Csnk2a2,CK2,C77789,1110035J23Rik                                 | 1.68E-07 | 1.84821  |
| BB283759  | Csnk2a1,MGC102141,Csnk2a1-rs4                                    | 0.00001  | 3.75135  |
| BM215803  | Csnk1g3,3300002K07Rik                                            | 1.35E-09 | 2.7637   |
| BB529152  | Csnk1d,AA409348,1200006A05Rik,D930010H05Rik                      | 0.00049  | 1.94252  |
| BG070544  | Csnk1a1,Csnk1a,                                                  | 1.65E-11 | 2.18393  |
| BG094076  | Csk,AW212630                                                     | 0.00031  | 2.59142  |
| BF661863  | Csf2rb1,Bc,Il3r,AIC2B,Il3rb,Il5rb,CDw131,Il3rb1,Csfgmrb,AI848964 | 0.00041  | 7.91311  |
| AK010433  | Cryz11,2210407J23Rik,2410006O11Rik                               | 0.00014  | 1.53827  |
| NM_019922 | Crtap,CASP,5730529N23Rik                                         | 1.18E-07 | 2.2392   |
| AK017702  | Crry,Mcp,mCRY,MGC102484                                          | 0.00038  | 2.38967  |
| NM_018827 | Crlf1,CLF-1,CRLM3,NR6.1                                          | 4.78E-15 | 12.70859 |
| NM_024223 | Crip2,Crp,Hlp,CRP2,ESP1,C77570,AW743261,0610010I23Rik            | 3.35E-12 | 2.74213  |
| NM_007763 | Crip1,CRHP,CRP1,Crip                                             | 6.59E-11 | 2.37317  |
| BC010712  | Cri1,EID1,EID-1,ORF12,PTD014,PNAS-22,2610002K20Rik               | 3.45E-14 | 2.573    |
| BB230757  | Creb3l2,BBF2H7,C530025K05Rik                                     | 0.00061  | 2.30026  |
| AU044960  | Creb3,Luman,C80076,LZIP-1,LZIP-2,AU044960,AW538053               | 1.56E-24 | 3.23326  |
| AK014391  | Creb1,Creb,Creb-1,AV083133,2310001E10Rik,3526402H21Rik           | 2.95E-06 | 1.5442   |
| BC018397  | Crabp2,Crabp-2,CrabplI,AI893628                                  | 0.00002  | 54.73571 |

|           |                                                            |          |          |
|-----------|------------------------------------------------------------|----------|----------|
| BE956581  | Cpt1c,MGC101932,6530437J22Rik,9630004I06Rik                | 2.87E-08 | 3.79086  |
| AI987925  | Cpt1a,CPT1,Cpt1,C730027G07                                 | 1.13E-09 | 1.85131  |
| BB377034  | Cpsf6,CFIM,CFIM68,AI256641,HPBR11-4,HPBR11-7,4733401N12Rik | 1.06E-06 | 2.83389  |
| BC023348  | Cpne2,MGC30751,MGC37787                                    | 4.13E-11 | 3.44313  |
| AK004327  | Cpm,MGC118152,1110060I01Rik,5730456K23Rik                  | 0.00007  | 3.80959  |
| NM_009946 | Cplx2,921-L,AI413745,AW492120                              | 0.00073  | 2.19848  |
| NM_007754 | Cpd,AA960140,AW322530,D830034L15Rik                        | 3.92E-11 | 1.93287  |
| AK003061  | Cpb1,AI504870,0910001A18Rik,1810063F02Rik,2210008M23Rik    | 7.22E-08 | 8.69835  |
| BB072673  | Cpa6,9030616D13Rik                                         | 0.00003  | 5.07334  |
| BB332449  | Cp,D3ErtD555e                                              | 3.35E-07 | 3.17722  |
| AV013496  | Cox6b2,COXVIB2,BC048670,MGC130249,MGC130250                | 1.54E-10 | 3.64452  |
| AW548837  | Coro1c,AL022675,AW455561,AW548837,MGC102522                | 6.80E-21 | 4.89503  |
| NM_011778 | Coro1b                                                     | 6.98E-11 | 2.925    |
| BC002136  | Coro1a,p57,TACO,Clabp                                      | 2.85E-21 | 6.71645  |
| NM_019877 | Copz2,zeta2-COP,1110012D12Rik                              | 0.00019  | 1.51108  |
| BC024686  | Copg,Copg1,AU019265,BC056168,D6Wsu16e,                     | 2.43E-06 | 2.07046  |
| AV109541  | Copb2,AI256832                                             | 8.29E-06 | 1.766    |
| BF147382  | Copb1,2610019B04Rik                                        | 7.07E-08 | 1.7863   |
| BM204808  | Copa,xenin,AU040324                                        | 6.40E-07 | 3.25636  |
| BB765132  | Colec10,MGC123727,MGC123950,MGC123951                      | 0.00002  | 4.59366  |
| BG229308  | Col8a2,AI429819,MGC90765                                   | 0.00005  | 3.93178  |
| NM_007739 | Col8a1,Col8a-1                                             | 1.47E-37 | 16.92749 |
| AF064749  | Col6a3,Col6a-3,AI507288                                    | 0.0001   | 2.19916  |
| BI455189  | Col6a2,Col6a-2,MGC36205                                    | 5.59E-12 | 3.64076  |
| NM_009933 | Col6a1,Col6a-1,AI747156                                    | 3.69E-13 | 3.12735  |
| AV229424  | Col5a2,D230017N05,1110014L14Rik                            | 2.18E-06 | 4.00033  |
| AW744319  | Col5a1                                                     | 6.42E-27 | 5.60128  |
| BB794645  | Col4a6,BB116301                                            | 2.94E-21 | 23.70033 |
| BM250666  | Col4a5                                                     | 1.11E-11 | 5.22341  |
| BC013560  | Col4a2,Col4a-2,MGC7371,AU019502,canstatin                  | 2.62E-13 | 2.50418  |
| BF158638  | Col4a1,Col4a-1                                             | 3.31E-25 | 3.44987  |
| BG075843  | Col3a1,Ms10w,Col3a-1,MMS10-W,AW550625,                     | 5.69E-39 | 12.62933 |
| BB044654  | Col27a1,AI449266,mKIAA1870,5730512J02Rik                   | 3.22E-17 | 21.6827  |
| AI429655  | Col23a1,AI429655,2810458L13Rik                             | 1.98E-06 | 6.43902  |
| BF227507  | Col1a2,oim,Cola2,Cola-2,Col1a-2,AA960264,AI325291          | 0.00095  | 2.25732  |
| U08020    | Col1a1,Cola1,Mov13,Cola-1,Mov-13,Col1a-1                   | 0.00002  | 2.58047  |
| NM_007733 | Col19a1                                                    | 0        | 19.80542 |
| D17546    | Col18a1,endostatin                                         | 0        | 33.65449 |
| BB766878  | Col16a1,CA1F,AI838662,2700007F12Rik,A530052M23Rik          | 5.21E-09 | 3.42852  |
| AW412729  | Col12a1,AW743884                                           | 7.80E-09 | 6.56639  |
| BB731671  | Coch,AW122937,Coch-5B2,D12H14S564E                         | 0.00003  | 5.85122  |
| AI415085  | Cobl,mKIAA0633,4732460E13,C530045F18Rik                    | 1.68E-10 | 3.521    |
| NM_007727 | Cntn1,CNTN,F3cam,AW495098                                  | 0.00009  | 3.80757  |
| BQ177934  | Cnr1,CB1,CB>1<                                             | 4.45E-07 | 7.71568  |
| BC018506  | Cnot6l,MGC29037,DKFZp434K098,4932442K20Rik                 | 7.65E-10 | 2.94441  |
| BM940481  | Cnot6,CCR4,AA407540,AW456442,MGC98472,A230103N10Rik        | 1.50E-23 | 2.51749  |
| AI314104  | Cnn3,C85854,1600014M03Rik                                  | 0        | 7.66769  |
| BI663014  | Cnn2,AA408047,AI324678                                     | 3.70E-08 | 3.0827   |
| AV351864  | Cnksr3,Magi1,BC024086,MGC37681,6820402C05                  | 0.00072  | 1.77718  |
| NM_133978 | Cmtrm7,Cklfsf7,AI481279                                    | 0.00002  | 3.22854  |
| BF140275  | Clta,AV026556                                              | 8.08E-06 | 2.84307  |
| AI448973  | Clstn2,Cs2,CSTN2,Cst-2,AI448973,KIAA4134                   | 0.00007  | 3.29858  |
| AV290890  | Clock,mKIAA0334,5330400M04Rik                              | 0.0004   | 2.21219  |
| BC015080  | Clk2,AU041688                                              | 0.00004  | 1.53535  |
| BB398988  | Clic4,TU-74,mc3s5,D0Jmb3,mtCLIC                            | 0.00003  | 2.71204  |
| NM_033444 | Clic1,G6,Clcp                                              | 2.96E-20 | 2.89021  |
| NM_021364 | Clec5a,Mdl1,Ly100,MDL-1,Clecsf5,MGC129446,MGC129447        | 0.00037  | 3.48811  |
| AF240358  | Clec4n,Clecsf10,dectin-2                                   | 1.06E-24 | 21.262   |
| NM_010819 | Clec4d,mcl,Mpcl,mMCL,Clecsf8,MGC117678                     | 3.78E-11 | 13.10337 |
| BB035924  | Clec1a,5930406N14Rik                                       | 0.00001  | 3.70567  |
| NM_009131 | Clec11a,Scgf,Clecsf3,AW457320                              | 0.00083  | 2.55244  |
| BB026487  | Cldn9                                                      | 1.60E-09 | 8.76915  |
| NM_016675 | Cldn2,AL022813                                             | 0.00024  | 6.27592  |
| BB202611  | Cldn10,D14ErtD728e,6720456I16Rik                           | 0.00028  | 3.78328  |
| BB794830  | Cicn5,Cic5,T25545,5430408K11Rik,D930009B12Rik              | 0.00032  | 2.50942  |
| BB825816  | Clcf1,CLC,Bsf3,MGC129162,MGC129163                         | 3.76E-07 | 10.15293 |

|           |                                                       |          |          |
|-----------|-------------------------------------------------------|----------|----------|
| NM_025415 | Cks2,CKSHS2,1110038L14Rik                             | 8.61E-07 | 8.55709  |
| AY046597  | Cklf,C32,CKLF1,CKLF3,CKLF4                            | 0.00097  | 1.97739  |
| BG967663  | Ckb,B-CK,Ck-3                                         | 8.21E-10 | 3.44699  |
| BB312117  | Ckap4,P63,CLIMP-63,5630400A09Rik                      | 1.84E-19 | 18.25611 |
| BM208103  | Ckap2,LB1,AI461656,AW228814                           | 0.00083  | 5.64145  |
| NM_025548 | Ckap1,CG22,TBCB,CKAPI,AU041393,2410007D12Rik          | 6.42E-10 | 1.64041  |
| BC003714  | Cib1,Kip,Cibkip,Prkdcip                               | 1.69E-32 | 3.18728  |
| BE979542  | Chtf18,Chl12,MGC38008,6030457M03Rik                   | 0.00011  | 5.71957  |
| BQ174991  | Chsy1,KIAA0990,mKIAA0990                              | 2.03E-08 | 3.3869   |
| NM_018763 | Chst2,Chts2,GST-2,Gn6st,AI428561,AW121776             | 1.55E-10 | 11.37479 |
| AK003880  | Chst11,C4s,C4ST,C4ST1,C4ST-1,1110020P09Rik            | 5.24E-35 | 9.15577  |
| NM_023850 | Chst1,C6ST,Gst1,GST-1,AW125896,KSGAL6ST,2610008E20Rik | 1.55E-07 | 2.76012  |
| NM_009604 | Chrng,Acrq,Achr-3                                     | 0        | 53.09158 |
| NM_021600 | Chrnd,Acrd,Achr-4,L10076                              | 6.83E-06 | 3.78851  |
| NM_007389 | Chrna1,Acra,Achr-1,AI385656,AI608266                  | 0        | 14.03428 |
| AK006398  | Chn2,Bch,ARHGAP3,1700026N20Rik                        | 0        | 29.43799 |
| NM_029716 | Chn1,ARHGAP2,AI413815,0610007I19Rik,                  | 4.23E-21 | 6.51488  |
| AK003313  | Chmp5,AW545668,2210412K09Rik                          | 7.35E-10 | 1.55721  |
| NM_013490 | Chka,Chk,ChoK,EtnK-alpha,Chetk-alpha                  | 0.00016  | 2.28125  |
| NM_028850 | Chic2,BTL,1700081B18Rik,4930502K01Rik                 | 7.05E-07 | 1.55026  |
| BG065782  | Chic1,Brx                                             | 5.05E-22 | 6.84786  |
| BC005611  | Chi3l1,Gp39,Brp39,brp-39,AW208766                     | 1.24E-09 | 3.8281   |
| AW553385  | Chfr,RNF116,C230082M18,5730484M20Rik                  | 2.59E-08 | 1.50562  |
| AK011183  | Chd3,Chd7,Prp7,Prp9-1,AF020312,MGC40857,2600010P09Rik | 0.0001   | 1.74406  |
| NM_007690 | Chd1,AI851787,AW555109,4930525N21Rik                  | 2.01E-06 | 2.36821  |
| BB458460  | Chchd6,0710001P09Rik,1700021B03Rik                    | 0.00021  | 1.991    |
| BE991735  | Chchd5,AW045710,1110027L01Rik                         | 0.00007  | 6.0712   |
| NM_009890 | Ch25h,m25OH,AI462618                                  | 0        | 36.95177 |
| BC023116  | Cgref1,CGR11,AW045201,1110004G24Rik                   | 0.00009  | 5.51899  |
| BI654095  | Cggbp1,AA960172,AL023996,AW045841                     | 0.00005  | 1.55032  |
| NM_007687 | Cfl1,Cof,cofilin,AA959946                             | 1.24E-09 | 3.09083  |
| AI987976  | Cfh,NOM,Sas1,Mud-1,Sas-1                              | 3.33E-06 | 2.57857  |
| BI905090  | Cerk,AI848610,mKIAA1646,D330016D08Rik                 | 4.73E-06 | 3.67875  |
| AW457682  | Cep57,Tsp57,AI467480,mKIAA0092,                       | 0.00014  | 1.82147  |
| BE688580  | Centg2,Ggap1,R75364,mKIAA1099                         | 0.0009   | 3.59675  |
| BC027165  | Centa2                                                | 6.96E-06 | 2.15409  |
| NM_007683 | Cenpc1,Cenpc                                          | 0.00064  | 1.96109  |
| AA285490  | Cdr2l,Gm21,D030068L24Rik                              | 0.00021  | 3.34131  |
| NM_007672 | Cdr2,AA617262                                         | 0.00008  | 1.96114  |
| NM_021339 | Cdon,CDO,Cd0,Orcam,MGC129383                          | 1.42E-06 | 5.06421  |
| AF059567  | Cdkn2b,p15,MTS2,INK4b,AV083695,p15INK4b,p15(INK4b)    | 9.01E-24 | 12.64717 |
| NM_009877 | Cdkn2a,Arf,p16,MTS1,p19ARF,p16INK4a,                  | 3.75E-14 | 8.90985  |
| NM_007669 | Cdkn1a,P21,CDKI,CIP1,SDI1,Waf1,mda6                   | 2.03E-24 | 35.25872 |
| BC025046  | Cdk8,MGC37111                                         | 0.00035  | 1.62214  |
| BM238926  | Cdk6,Crk2,AI504062,5830411I20                         | 4.57E-22 | 9.1219   |
| BB177836  | Cdk5r1,p35,Cdk5r,D11Bwg0379e                          | 8.55E-10 | 6.32708  |
| NM_009870 | Cdk4,Crk3                                             | 1.19E-22 | 2.79357  |
| AK004852  | Cdk2ap1,Doc1,ST19,Apc10,DORC1                         | 0.00065  | 1.73218  |
| NM_016756 | Cdk2,A630093N05Rik                                    | 0.00001  | 2.15997  |
| BC021473  | Cdipt,Pis,Pis1,D7Bwg0575e,9530042F15Rik               | 0.00008  | 1.93143  |
| BB311117  | Cdipt,Pis,Pis1,D7Bwg0575e,9530042F15Rik               | 2.73E-10 | 1.82789  |
| BC022107  | Cdh2,CDHN,Ncad,N-cadherin                             | 6.39E-24 | 9.06017  |
| NM_007662 | Cdh15,Mcad,Cdh14,AI323380                             | 7.57E-07 | 2.57108  |
| NM_009866 | Cdh11,Cad11,MGC25339,2810038F24,2610005L07Rik         | 1.84E-39 | 14.9272  |
| NM_009864 | Cdh1,Um,UVO,Ecad,AA960649,MGC107495                   | 2.60E-12 | 3.3507   |
| AV307110  | Cdca8,BOR,MESRGP,AU044747,D4Ert421e,4831429J16Rik     | 2.21E-06 | 12.1173  |
| BC006933  | Cdca7l,JPO2,BC006933,MGC11998                         | 7.91E-06 | 3.03347  |
| NM_026410 | Cdca5,C85404,AL024086,AW536684,2610036L13Rik          | 0.00032  | 6.24263  |
| AF322238  | Cdca4,HEPP,2410018C03Rik                              | 6.89E-06 | 5.042    |
| BI081061  | Cdca3,C8,Grc8,Tome-1,2410005A12Rik                    | 0.00005  | 4.9462   |
| NM_011799 | Cdc6,CDC18L                                           | 0.00013  | 4.19986  |
| NM_009862 | Cdc45l                                                | 0.00003  | 2.91853  |
| AK008084  | Cdc42se1,SCIP1,Spec1,Cdcse1,AW558204,1300002M12Rik    | 3.90E-10 | 3.03951  |
| NM_020006 | Cdc42ep4,CEP4,Borg4,1500041M20Rik                     | 0.00079  | 2.88885  |
| BI651416  | Cdc42bpg,BC046418                                     | 0.00002  | 2.50313  |
| BI154551  | Cdc42bpb,DMPK-like                                    | 0.00083  | 10.13557 |



|           |                                                            |          |          |
|-----------|------------------------------------------------------------|----------|----------|
| BG518726  | Cdc42bpa,DMPK-like,A930014J19Rik                           | 4.23E-08 | 3.75044  |
| BG070538  | Cdc2l5,2310015O17Rik                                       | 0.00012  | 3.55205  |
| NM_007659 | Cdc2a,CDK1,Cdc2,p34<CDC2>                                  | 0.00005  | 12.20806 |
| BB754492  | Cdc27,APC3,HNUC,CDC27Hs,AI452358,BC023187                  | 0.00024  | 2.03543  |
| NM_023117 | Cdc25b,AI604853                                            | 5.48E-32 | 5.74776  |
| BB041150  | Cdc20,C87100,p55CDC,2310042N09Rik                          | 0.00004  | 3.73868  |
| BB334959  | Cd99l2,Xap89,Mic2l1,AW548191                               | 7.13E-06 | 5.10897  |
| AK002762  | Cd99,D4,pilr-1,1110061M03Rik,2410026K10Rik                 | 0.00008  | 4.86073  |
| NM_011925 | Cd97,TM7LN1,AA409984                                       | 7.35E-12 | 3.6943   |
| NM_007657 | Cd9,Tspan29                                                | 2.94E-26 | 3.30203  |
| NM_019388 | Cd86,B7,B70,MB7,B7-2,CLS1,Ly58,Ly-58,Cd28l2,TS/A-2         | 0.0001   | 4.88907  |
| NM_007656 | Cd82,C33,Kai1,Tspan27,AA682076,AL023070                    | 2.17E-21 | 5.0212   |
| NM_133655 | Cd81,Tapa1,Tapa-1,Tspan28                                  | 3.17E-08 | 1.61355  |
| BC003476  | Cd74,li,CLIP,DHLAG,HLADG,la-GAMMA                          | 0.00045  | 2.31556  |
| X66083    | Cd44,Ly-24,Pgp-1,HERMES,AW121933,AW146109                  | 1.39E-27 | 27.99852 |
| BB220422  | Cd40,IGM,p50,Bp50,GP39,IMD3,TRAP,HIGM1,                    | 5.73E-10 | 11.62753 |
| M58149    | Cd3g,T3g,Ctg3,Ctg-3                                        | 0.00003  | 4.53104  |
| NM_025422 | Cd302,AI159627,1110055L24Rik                               | 0.00002  | 1.81744  |
| AF251705  | Cd300d,CLM4,DlgR1,Igsf7,Lmir2,Cd300c,MAIR-II               | 4.96E-07 | 2.28812  |
| AI536469  | Cd300a,CIm8,LMIR1,MMAC8,Pigr4,mcpir1,MAIR-la,B230315M08Rik | 8.45E-08 | 4.45218  |
| NM_009841 | Cd14                                                       | 0.00022  | 2.60187  |
| AV246882  | Cd109,GARP,AI480638,9930012E15Rik                          | 7.40E-09 | 67.72136 |
| NM_009840 | Cct8,Cctq,AI132397                                         | 0        | 1.58835  |
| NM_007638 | Cct7,Ccth,Cctz,AA408524,AL022769                           | 4.10E-06 | 1.59079  |
| AI325146  | Cct6a,Cct6,Cctz-1                                          | 1.14E-20 | 1.62629  |
| BM206269  | Cct4,A45,Cctd,C78323,2610204B21Rik                         | 0.00008  | 3.12915  |
| NM_009836 | Cct3,Cctg,Tric-P5,AL024092,Tcp1-rs3                        | 2.10E-26 | 1.57221  |
| NM_007636 | Cct2,Cctb                                                  | 2.21E-15 | 1.81743  |
| NM_010490 | Ccrn4l,Ccr4,AU043840,nocturnin                             | 0.00005  | 1.97436  |
| BB543291  | Ccr1l,PPR1,CCBP2,CCR11,VSHK1,CCX-CKR,                      | 0.0001   | 2.50583  |
| BB148128  | Ccr2,CKR2,CCR2A,CCR2B,CKR2A,CKR2B,mJE-R                    | 0.00014  | 2.55667  |
| AV231648  | Ccr1,Cmkbr1,Mip-1a-R                                       | 0.00007  | 4.07655  |
| BM250672  | Ccnl1,Ccnl,ania-6a,AU018493,2610030E23Rik                  | 2.31E-17 | 1.66386  |
| NM_017367 | Ccni                                                       | 0.00002  | 1.64079  |
| U95826    | Ccng2,MGC113793                                            | 1.86E-12 | 1.98851  |
| BE691816  | Ccnd3,C78795,AA682053,AL024085,AW146355                    | 1.47E-21 | 11.71015 |
| NM_007631 | Ccnd1                                                      | 0.00067  | 2.32211  |
| AK014079  | Ccnc,CG1C,AI451004,AU020987                                | 0.00009  | 3.68138  |
| AK013312  | Ccnb2,CycB2                                                | 5.54E-08 | 8.8158   |
| NM_007629 | Ccnb1-rs1,CycB1,Cycb-5,Cycb1-rs1                           | 0.00033  | 14.54338 |
| X75483    | Ccna2,Ccn1,Ccna,Cyca,Ccn-1,AA408589                        | 1.05E-06 | 9.81633  |
| AF128193  | Ccl7,fic,marc,mcp3,MCP-3,Scya7                             | 0.00057  | 4.4075   |
| NM_011337 | Ccl3,Mip1a,Scya3,G0S19-1                                   | 0.00003  | 5.45841  |
| AF065933  | Ccl2,JE,HC11,MCAF,MCP1,MCP-1,Scya2,Sigje,SMC-CF,AI323594   | 0.0004   | 4.53613  |
| U50712    | Ccl12,MCP-5,Scya12                                         | 0.00002  | 12.18343 |
| AK011186  | Ccdc9,2600011L02Rik                                        | 0.00078  | 2.75953  |
| BQ174391  | Ccdc39,AI447426,D3Erd789e,4921507O14Rik                    | 0.00053  | 2.09887  |
| AV295080  | Ccdc32,Gm631,MGC60849                                      | 2.35E-08 | 1.96638  |
| AW538049  | Ccar1,Carp1,MGC90759,2610511G16Rik,9430036H15Rik           | 2.03E-14 | 1.82359  |
| NM_007626 | Cbx5,HP1,HP1a,C75991,2610029O15Rik                         | 5.19E-23 | 3.47349  |
| BB458874  | Cbl,cbl,Cbl-2,c-Cbl,4732447J05Rik                          | 0.00013  | 3.31432  |
| BC023022  | Cbara1,CALC,MGC29229,MGC36365,                             | 0.00008  | 2.24801  |
| NM_007617 | Cav3,Cav-3,M-cav,AI385751,M-caveolin,caveolin-3            | 0        | 4.13877  |
| NM_009814 | Casp2,ESTM52,AA033488,AW146219,MGC115896                   | 3.17E-23 | 6.78721  |
| NM_009811 | Casp6,Mch2,mCASP-6                                         | 1.78E-08 | 2.30405  |
| D86352    | Casp3,Lice,Yama,CPP32,Apopain,Caspase-3,A830040C14Rik      | 1.19E-09 | 7.35831  |
| NM_007609 | Casp11,Casp4,Caspl,ich-3,Caspase-11                        | 1.52E-06 | 6.28993  |
| Y17137    | Cask,LIN-2,Pals3,DXPri1,DXRib1,mLin-2,MGC7449              | 0.00053  | 4.0559   |
| AV311104  | Casc4,VGFG2573,D130060C09Rik                               | 1.83E-31 | 7.91579  |
| BB766747  | Card6,D730008L15                                           | 9.09E-08 | 2.87696  |
| NM_007606 | Car3,Car-3,BB219044                                        | 9.61E-16 | 2.86859  |
| AK010166  | Car13,2310075C21Rik                                        | 3.52E-10 | 4.34806  |
| AI463215  | Capza1,CAPZ,CAZ1,Cappa1                                    | 8.95E-16 | 1.58161  |
| AW743924  | Capns2,2310005G05Rik                                       | 1.33E-07 | 10.68003 |
| AI747133  | Capn6                                                      | 1.36E-37 | 65.9057  |
| BC014767  | Capn5                                                      | 3.80E-06 | 4.5419   |

|           |                                                     |          |          |
|-----------|-----------------------------------------------------|----------|----------|
| NM_009794 | Capn2,Capa2,Capa-2,AI326419,m-calpin                | 1.35E-26 | 2.02975  |
| BB136012  | Capg,mh1,gCap39                                     | 5.55E-09 | 3.48514  |
| NM_007598 | Cap1                                                | 1.55E-15 | 1.67908  |
| AI988026  | Canx,CNX,AI988026,D11Erd153e,1110069N15Rik          | 7.17E-14 | 3.58602  |
| AI510077  | Cand1,Tp120a,AI195005,AI846556,                     | 2.01E-17 | 2.6336   |
| AK005444  | Camsap11I,mKIAA1078,1600013L13Rik,4930541M15Rik     | 2.56E-19 | 2.36714  |
| AW061083  | Camkk2,AW061083,mKIAA0787,6330570N16Rik             | 2.45E-06 | 1.97526  |
| BB373572  | Camk2d,KIAA4163,MGC60852,                           | 0.00073  | 1.97868  |
| BG862223  | Camk2b,Camk2d,MGC90738                              | 0.00009  | 5.78483  |
| BB230839  | Camk1d,CKLiK,A630059D12Rik,E030025C11Rik            | 5.05E-09 | 2.05967  |
| NM_007594 | Calu,9530075H20Rik                                  | 3.05E-31 | 2.87031  |
| AW544960  | Calr,CRT,Calregulin                                 | 2.71E-13 | 2.03834  |
| NM_027416 | Calml3,AI326174,2310068O22Rik                       | 3.91E-15 | 22.32328 |
| AK014755  | Cald1,AI195384,AV071549                             | 4.96E-21 | 15.93808 |
| AK010453  | Cad,Cpad,AU018859,2410008J01Rik                     | 2.56E-09 | 4.28651  |
| NM_007581 | Cacnb3,Beta3,Cchb3                                  | 3.75E-17 | 4.67064  |
| NM_009785 | Cacna2d3,Cacna3                                     | 0.00008  | 6.68266  |
| BB464523  | Cacna2d1,Cacna2,Cchl2a                              | 0.0001   | 2.43553  |
| BB730977  | Cachd1,Vwcd1,AI852726,mKIAA1573,                    | 6.04E-07 | 2.51825  |
| BM213777  | C920006C10Rik,                                      | 0.00012  | 2.45223  |
| BQ031259  | C79267,MGC36549                                     | 2.21E-15 | 7.92354  |
| C77805    | C77805                                              | 1.27E-07 | 3.29778  |
| BB001490  | C77604,G10,EDG2,EDG-2                               | 1.38E-17 | 1.5332   |
| BG075041  | C730024G19Rik,A230083D09                            | 0.00005  | 2.06233  |
| NM_009779 | C3ar1,AZ3B,C3AR,HNFAG09                             | 0.00044  | 4.19787  |
| BI104294  | C330027G06Rik                                       | 5.85E-06 | 2.34964  |
| AU018569  | C330027C09Rik,AA408511,AU018569                     | 0.00005  | 2.0996   |
| BE985366  | C330008K14Rik,1700003A01Rik                         | 1.41E-07 | 2.85716  |
| BG075755  | C230098O21Rik,AI836570,AW557042                     | 0.00031  | 2.17129  |
| BG064982  | C230096C10Rik,mKIAA0090                             | 0.00062  | 1.55411  |
| BC026466  | C230081A13Rik,AA690169,BE132841                     | 0.00002  | 3.67291  |
| BC022123  | C1s,C1sa,AA959438,AI255193,AI327365,MGC37773        | 0.0002   | 1.6418   |
| AK012868  | C1qtnf6,CTRP6,AI415568,AW743441,2810036M19Rik       | 0.00002  | 4.28006  |
| BC023068  | C1qtnf5,CTRP5                                       | 2.38E-15 | 3.26097  |
| NM_030888 | C1qtnf3,Cors,CTRP3,Corcs,CORS-26,                   | 1.03E-17 | 27.55547 |
| BB768838  | C1ql3,C1ql,K100,AI661623,1110065A22Rik              | 0        | 25.47951 |
| NM_007574 | C1qg,C1qc,AI385742                                  | 2.90E-11 | 2.50181  |
| NM_009777 | C1qb                                                | 3.79E-25 | 2.69943  |
| BM116147  | C130089L09Rik                                       | 0.00069  | 5.83176  |
| BG068916  | C130086A10                                          | 6.64E-06 | 6.68487  |
| BB202655  | C130076O07Rik,NrCAM,mKIAA0343,C030017F07Rik         | 8.66E-14 | 6.84286  |
| AV320517  | C130075A20Rik,AV320517                              | 2.13E-15 | 3.84954  |
| BC026562  | C130052I12Rik,Crr9,MGC36304                         | 7.94E-14 | 1.68578  |
| BB526251  | C130009A20Rik                                       | 8.96E-10 | 3.44896  |
| BB771017  | C030033M12Rik                                       | 0.00003  | 2.36832  |
| BQ174247  | C030032C09Rik,MGC102232                             | 2.50E-06 | 3.42192  |
| BB358264  | C030027H14Rik,AI836126                              | 6.43E-09 | 1.96341  |
| AV144956  | Bzw1,MGC6434,mKIAA0005,1200015E15Rik                | 0        | 2.81481  |
| AV101079  | Bzrp,IBP,PBR                                        | 4.50E-28 | 2.09115  |
| BE986800  | Bub3,C78067,AU019800,AU021329,AU043350,AW146323     | 5.20E-07 | 1.53934  |
| AU045529  | Bub1b,BUBR1,AU045529,MGC36092                       | 0.00031  | 7.19769  |
| AF002823  | Bub1,Bub1a,C80208,D2Xrf87,AL022991                  | 0.00009  | 11.05099 |
| NM_009770 | Btg3,ANA,tob5                                       | 6.36E-07 | 2.94646  |
| L16846    | Btg1,AW546738                                       | 0        | 2.91495  |
| BQ175196  | Btbd9,AI464421,4930402L05,1700023F20Rik             | 0.00026  | 2.06688  |
| BC018174  | Btbd3,MGC25591,mKIAA0952                            | 0.00009  | 2.65623  |
| AW987520  | Brwd3,Brodl,Gm596,D030064D06Rik                     | 0.00076  | 1.74816  |
| BM219644  | Brd8,SMAP,2610007E11Rik,4432404P07Rik,4933408B17Rik | 1.15E-10 | 1.83517  |
| BG072367  | Brd3,ORFX,Fsrg2,RINGL3,AW060456,2410084F24Rik       | 0.00034  | 3.10769  |
| BB327307  | Braf,B-raf,Braf2,Braf-2,C87398,                     | 0.00015  | 2.30282  |
| BE992311  | Bola2,BolA-2,1110025L05Rik                          | 0.00003  | 2.76911  |
| NM_016778 | Bok,mtd,matador,AI847676,AU021146                   | 2.32E-11 | 9.02267  |
| AI450929  | Bnc2,MGC124423,MGC124424,5031434M05Rik              | 4.73E-14 | 1.6508   |
| AW546137  | Bmpr2,BMP-2,BMPR-II,AL117858,AW546137,              | 2.85E-16 | 1.55452  |
| NM_007557 | Bmp7,OP1                                            | 2.76E-20 | 20.67635 |
| NM_007556 | Bmp6,Vgr1,Vgr-1,D13Wsu115e                          | 0.00003  | 1.85145  |

|           |                                                          |          |          |
|-----------|----------------------------------------------------------|----------|----------|
| NM_007555 | Bmp5,se,AU023399                                         | 6.02E-19 | 6.72692  |
| NM_007554 | Bmp4,Bmp2b,Bmp2b1,Bmp2b-1                                | 2.59E-19 | 4.67218  |
| AV239587  | Bmp2,Bmp2a,AI467020                                      | 3.56E-24 | 6.60108  |
| BG248060  | Bmp1,TLD                                                 | 0.00054  | 3.25323  |
| BB212341  | Bmf,AW260063,AW411872                                    | 0.00003  | 2.08074  |
| BB303939  | Blmh,BH,BMH,AI035728,MGC36899,MGC37104,MGC39026          | 0.00084  | 1.88488  |
| BC004702  | Birc5,Api4,TIAP,AAC-11,survivin40                        | 1.28E-09 | 25.00239 |
| NM_021328 | Bin3,1700015F07Rik                                       | 0.00003  | 2.23328  |
| NM_007544 | Bid,AI875481,AU022477,2700049M22Rik                      | 0.00048  | 4.99125  |
| NM_029791 | Bicc2,KIAA0699,mKIAA0699,0610027D24Rik,1110005D12Rik     | 0.00046  | 7.32873  |
| BM217996  | Bicc1,bpk,jcpk,Bic-C                                     | 2.38E-28 | 3.72242  |
| BB028100  | Bhlhb9,2700087I09Rik                                     | 3.39E-08 | 5.08889  |
| BC019502  | Bgn,BG,PGI,DSFG1,PG-S1,SLRR1A                            | 3.32E-36 | 7.55114  |
| NM_009052 | Bex1,Bex4,Rex3,AA407839,AU018692,MGC107097               | 0        | 4.22093  |
| NM_018742 | Bet1,Gs15,2610021K23Rik                                  | 1.65E-06 | 1.8263   |
| AF240460  | Bean                                                     | 8.69E-12 | 3.66256  |
| AW490711  | Bdkrb2,B2,B2R,BK2,B(2),BK-2,BK2R,BKR2,BRB2               | 1.69E-13 | 13.1627  |
| BI965039  | Bclaf1,Btf,AI450190,AW556225,KIAA0164                    | 1.95E-06 | 1.90021  |
| AV173898  | Bcl9,Gm130,2610202E01Rik,8030475K17Rik,A330041G23Rik     | 0.00015  | 4.25756  |
| BM120925  | Bcl2I11,Bim,Bod                                          | 1.96E-13 | 5.21189  |
| L16462    | Bcl2a1a,A1,Bfl-1,Hbpa1,Bcl2a1,BB218357                   | 2.43E-07 | 5.74768  |
| BI664467  | Bcl2,Bcl-2,AW986256,C430015F12Rik                        | 0.0001   | 2.59452  |
| AF100339  | Bcl10,CLAP,ME10,cE10,CIPER,BCL-10,C81403,CARMEN,AI132454 | 1.29E-15 | 1.54587  |
| BB251739  | Bcar1,Cas,Crkas,AI385681                                 | 0.00054  | 2.17788  |
| AV357135  | BC065123                                                 | 9.50E-21 | 9.87662  |
| BB151460  | BC065085,A030013D21                                      | 2.48E-26 | 7.03431  |
| BM207348  | BC063749,KIAA1754,mKIAA1754                              | 1.71E-09 | 6.64605  |
| BG076273  | BC057627,Gm768,KIAA1064,MGC67629,mKIAA1064               | 0.00081  | 4.13915  |
| AV121345  | BC055368,D430005B17                                      | 8.03E-06 | 2.45683  |
| AV167328  | BC054438                                                 | 1.25E-09 | 1.75373  |
| AW122690  | BC052688                                                 | 7.94E-21 | 1.832    |
| BM224662  | BC052328,MGC59004,9830126M18                             | 1.08E-26 | 7.21862  |
| AK006395  | BC051628,MGC58365,1700026M20Rik                          | 0.00042  | 2.29703  |
| BM933144  | BC046404,MGC59632                                        | 2.33E-11 | 3.66305  |
| BM120580  | BC043098,KIAA4042,MGC58017,mKIAA4042                     | 1.15E-08 | 1.86457  |
| BG066664  | BC032204,C79673,MGC36836,MGC38286                        | 0.00012  | 3.52046  |
| AW124853  | BC030183,MGC29254                                        | 3.02E-07 | 8.61065  |
| BG173681  | BC029169,Fam20a,AI606893                                 | 1.93E-06 | 8.23051  |
| AV012073  | BC027309,MGC28139                                        | 2.74E-09 | 2.86219  |
| BC027231  | BC027231,MGC27931                                        | 0.00013  | 4.32475  |
| BB445523  | BC027092,KIAA1052,MGC38792,mKIAA1052,D030051D21          | 1.32E-06 | 6.62587  |
| BB258011  | BC027061                                                 | 1.19E-06 | 4.17336  |
| BB459141  | BC026590                                                 | 6.67E-08 | 3.05744  |
| BB452429  | BC025575                                                 | 7.64E-06 | 5.38611  |
| BC025076  | BC025076,AI852046,MGC36859                               | 8.73E-12 | 5.7692   |
| BC024969  | BC024969,Kiaa0863,MGC38953,mKIAA0863                     | 0.00029  | 2.78612  |
| BB165030  | BC024063,A130081B01                                      | 0.00004  | 2.6043   |
| BC022687  | BC022687,AW050009,Flj20080,C130001I08Rik                 | 4.64E-06 | 3.47927  |
| BI150732  | BC022641                                                 | 0.00028  | 1.73057  |
| BC017643  | BC017643,MGC28978,MGC37062,MGC37382                      | 8.17E-06 | 2.2338   |
| BC027150  | BC014699,MGC25911,MGC37042                               | 1.26E-25 | 7.7964   |
| BE853170  | BC006779,MGC63178,mKIAA1769                              | 0.00002  | 1.6145   |
| BI155782  | BC005537,C78201,MGC7474,RP23-92G13.4,8030460C05Rik       | 3.71E-19 | 1.99453  |
| BC005471  | BC005471,MGC6652                                         | 0.00039  | 3.04727  |
| NM_030565 | BC004044,C76981,Fam20c,MGC7673,KIAA4081,mKIAA4081        | 1.11E-17 | 3.18976  |
| BB532946  | BC003993,MGC7531,AA684037                                | 1.20E-21 | 2.41707  |
| BI526818  | BC003940                                                 | 2.46E-06 | 1.52905  |
| AV260123  | Bbs5,1700049I01Rik,2700023J09Rik                         | 2.22E-10 | 2.70514  |
| AF342737  | Bbs2,AI447581,2410125H22Rik                              | 0.00004  | 2.99679  |
| BB164513  | BB164513                                                 | 0.00005  | 2.83723  |
| BC025893  | BB146404                                                 | 3.44E-06 | 2.42482  |
| BB125219  | BB125219                                                 | 3.91E-07 | 2.99398  |
| BG069319  | Baz2a,Tip5,Walp3,C78388,AA415431,mKIAA0314,C030005G16Rik | 1.60E-06 | 2.56415  |
| BM239162  | Baz1a,Acf1,Gtl5,cbp146,Wcrf180,BC065123,B930060C03       | 1.27E-08 | 2.39767  |
| BC018228  | Bax                                                      | 5.47E-07 | 2.56513  |
| BI083627  | Bat2d,Bat2d1,                                            | 0.00056  | 2.37153  |

|           |                                                             |          |          |
|-----------|-------------------------------------------------------------|----------|----------|
| AK011545  | Basp1,CAP23,Ckap3,NAP22,CAP-23,NAP-22,2610024P12Rik         | 2.21E-08 | 3.88088  |
| AF153440  | Bambi,2610003H06Rik                                         | 0.00002  | 3.31544  |
| BC015459  | Baiap2l1,AI585895,1300006M19Rik                             | 7.32E-14 | 13.32693 |
| NM_007522 | Bad,Bbc2,AI325008                                           | 0.00002  | 3.64037  |
| AV324314  | Bach1,AI323795                                              | 4.33E-13 | 1.54692  |
| AF200346  | Bace1,C76936                                                | 0.00022  | 11.40698 |
| BB175696  | Baalc,2810457D07Rik                                         | 3.46E-07 | 18.495   |
| BM239301  | B930068K11Rik                                               | 0.00032  | 2.29746  |
| BB521146  | B930062P21Rik                                               | 7.47E-16 | 3.11661  |
| AW556301  | B930007L02Rik,AI447437,mKIAA0800                            | 2.62E-12 | 2.48341  |
| BB333487  | B830012L14Rik                                               | 0.00021  | 3.65054  |
| BG066773  | B4galt6,AA536803,AU022389                                   | 1.78E-10 | 8.07878  |
| BF780384  | B4galt5,AW049941,AW539721,9430078I07Rik                     | 8.05E-10 | 4.15434  |
| BC027370  | B430108F07Rik,AI448092                                      | 2.28E-07 | 2.04253  |
| BM214359  | B3gnt5,beta3GnT5                                            | 8.02E-08 | 6.88615  |
| AV306734  | B3gnt1,B3Galt6,AA408337,AA409404,AW260308,                  | 1.79E-09 | 4.97661  |
| BB223909  | B3galt2                                                     | 2.13E-08 | 2.74293  |
| BB827631  | B230396K10Rik                                               | 1.37E-09 | 3.45883  |
| AW554529  | B230308N11Rik                                               | 0.00002  | 1.72516  |
| BM898653  | B230209C24Rik                                               | 0.00011  | 3.17133  |
| BB211377  | B230114P05Rik,AI585901                                      | 1.09E-07 | 4.25523  |
| BC024141  | B130052G07Rik,MGC38004                                      | 3.10E-09 | 4.34216  |
| BE626090  | Azin1,Oazi,Oazin,AI414949,1700085L02Rik                     | 5.81E-11 | 2.32281  |
| AA500897  | Axl,Ark,Ufo,Tyro7,AI323647                                  | 3.73E-11 | 2.02723  |
| AW556912  | AW822216                                                    | 0.00041  | 3.93869  |
| BQ178166  | AW742931                                                    | 1.37E-08 | 4.86161  |
| AW492303  | AW492303                                                    | 0.00004  | 2.53154  |
| AV300228  | AW491445                                                    | 4.63E-06 | 2.71304  |
| BB795103  | AW228836                                                    | 0.00003  | 1.60658  |
| BB539028  | AW124694                                                    | 0.00004  | 2.70915  |
| AW120464  | AW060763                                                    | 8.49E-21 | 15.1175  |
| BE995447  | AW045895                                                    | 3.77E-08 | 9.37128  |
| BI649826  | Avpi1,esu,VIT32,mVIT32,AA410041,2310008N12Rik               | 0.00002  | 1.72818  |
| BB313689  | AV344025,AI852629                                           | 1.73E-06 | 4.47233  |
| AK012475  | Auts2,2700063G02Rik,A730011F23Rik,D830032G16Rik             | 0.00011  | 5.36216  |
| AU042950  | AU042950                                                    | 0.00026  | 2.77016  |
| BG068103  | AU041783,C86904,KIAA1914,MGC28084,mKIAA1914                 | 4.00E-06 | 3.74775  |
| BG069874  | AU021025                                                    | 0.00095  | 2.03427  |
| BG070741  | AU016977,9530023G02                                         | 2.15E-09 | 6.57439  |
| BG070233  | AU015263                                                    | 3.06E-09 | 3.95282  |
| BQ175324  | AU014645,Ncbp1,AW538051                                     | 2.41E-07 | 1.60989  |
| AV309164  | Atxn10,E46,Sca10,C77170,AI325283                            | 9.26E-09 | 1.84676  |
| BB730600  | Atrx,XH2,Xnp,ATR2                                           | 0.0008   | 1.89998  |
| NM_007512 | Atpif1,If1,Atpi                                             | 2.62E-12 | 2.35826  |
| AF011336  | Atp9a,Ila,mKIAA0611                                         | 0.00013  | 3.15276  |
| BQ178970  | Atp8b2,Id                                                   | 2.24E-08 | 2.32768  |
| BF451402  | Atp8b1,Ic,FIC1,AI451886                                     | 0.00003  | 2.23793  |
| U03434    | Atp7a,Mo,br,Blo,l14,MNK,blotchy,mottled,brindled,DXHXS1608e | 2.12E-26 | 2.61985  |
| C85064    | Atp6v1e1,E2,P31,Vma4,Atp6e,Atp6e2,Atp6v1e                   | 1.89E-07 | 1.50563  |
| AA987147  | Atp6v1c1,U13839,1700025B18Rik                               | 2.82E-12 | 1.62181  |
| NM_007508 | Atp6v1a,VA68,VPP2,Atp6a1,Atp6a2,AI647066,Atp6v1a1           | 1.23E-09 | 1.53269  |
| NM_025272 | Atp6v0e,M9.2,Atp6k                                          | 6.67E-25 | 1.97903  |
| AV121721  | Atp6ap2,M8-9,Atp6ip2,APT6M8-9,ATP6M8-9,5730403E06Rik        | 2.42E-13 | 2.06415  |
| BI080417  | Atp2b1,Pmca1,2810442I22Rik,E130111D10Rik                    | 2.24E-10 | 1.92569  |
| AA245637  | Atp2a2,SERCA2,KIAA4195,D5Wsu150e                            | 0        | 3.4717   |
| BC025618  | Atp1a1,Atpa-1,BC010319,MGC38419                             | 1.09E-08 | 2.05015  |
| BB427761  | Atp13a5,C630015F21Rik                                       | 0        | 27.29369 |
| BF470853  | Atp13a5,C630015F21Rik                                       | 2.71E-26 | 7.06986  |
| AI593492  | Atp11c,Ig,MGC117487,A330005H02Rik                           | 0.00021  | 2.05315  |
| NM_009720 | Atox1,ATX1,AI256639                                         | 4.36E-06 | 1.70341  |
| AK016909  | Atoh8,Hath6,Math6,okadin,4933425C05Rik                      | 1.63E-09 | 14.66482 |
| NM_007499 | Atm,C030026E19Rik                                           | 3.80E-12 | 6.91598  |
| AV168389  | Atg5,App5l,Atg5l,Paddy,C88337,AW319544                      | 5.09E-07 | 2.14765  |
| AK010773  | Atg16l2,2410118P20Rik                                       | 0.00012  | 2.78207  |
| BB129063  | Atf6,ESTM49,AA789574,9630036G24,9130025P16Rik               | 7.41E-16 | 7.23967  |
| BE956516  | Asxl1,mKIAA0978,DKFZp434N0535                               | 0.00002  | 1.82575  |

|           |                                                           |          |          |
|-----------|-----------------------------------------------------------|----------|----------|
| NM_007494 | Ass1,ASS,Ass-1,AA408052,MGC103151                         | 5.22E-34 | 32.55058 |
| AV145167  | Aspscr1,TUG,ASPC,ASPL,ASPS,RCC17,ASPCR1,1190006K01Rik     | 0.00009  | 4.50739  |
| NM_025711 | Aspn,PLAP1,SLRR1C,AA986886,4631401G09Rik                  | 0.00056  | 2.95326  |
| NM_009791 | Aspm,Sha1,MCPH5,Calm1p1,FLJ10518,D330028K02Rik            | 0.00004  | 4.57269  |
| BB410403  | Asph,BAH,cl-37,                                           | 4.59E-08 | 1.74315  |
| BC005552  | Asns                                                      | 4.29E-06 | 1.70462  |
| BC003428  | Asf1b,AA409591,1700003K02Rik                              | 0.00034  | 4.56165  |
| NM_019734 | Asah1,AC,Asah,AL022942,AU044555,2310081N20Rik             | 7.80E-09 | 1.81693  |
| BB322201  | Arx                                                       | 0        | 21.26159 |
| BC019117  | Ars2,Asr2,ASR2A,ASR2B,ASR2C,ASR2D                         | 0.00002  | 1.79451  |
| AK004614  | Arrib1,AW208571,MGC124269,MGC124270                       | 0.00053  | 2.63233  |
| BB234224  | Arpp21,Tarpp,ARPP-21,AI853636,D9Bwg1012e,0710001E13Rik    | 2.39E-07 | 3.34477  |
| BB159263  | Arpp21                                                    | 8.71E-26 | 7.61597  |
| NM_026369 | Arpc5,165kDa,p16-Arc,5830443F10Rik                        | 0.00001  | 2.32017  |
| BC013618  | Arpc3,21kDa,p21-Ar,p21Arc,AA408672,AI788639,1110006A04Rik | 2.31E-13 | 1.89813  |
| BG967632  | Arpc2,34kDa,p34-Arc,2210023N03Rik                         | 8.88E-15 | 1.94021  |
| BC011080  | Arntl,MOP3,Arnt3,Bmal1,BMAL1b,bmal1b'                     | 1.06E-07 | 1.95271  |
| AK014338  | Armet,D17914,AA407711,AA408789,3230402M22Rik              | 2.15E-06 | 3.46295  |
| AK004598  | Armxc3,ALEX3,AI450003,1200004E24Rik                       | 6.86E-18 | 3.08681  |
| NM_026139 | Armxc2,ALEX2,AI043003,3230401N03Rik                       | 3.82E-12 | 4.05846  |
| BC021410  | Armxc1,ALEX1,3010033I09Rik                                | 5.89E-08 | 3.16265  |
| NM_019665 | Arl6,1110018H24Rik,2210411E14Rik                          | 0.00003  | 1.84516  |
| BB811124  | Arl5a,Arl5,T25534,AA408731,AW610751,                      | 0.00011  | 1.67542  |
| BB699910  | Arid5b,Mrf2,Desrt,AI467247,Mrf2beta,                      | 9.27E-07 | 4.58176  |
| BC027152  | Arid5a,Mrf1,MGC36895,D430024K22Rik                        | 4.38E-07 | 7.5413   |
| BC025127  | Arhgef5,Tim1,AA717842,AW495314,2210412D05Rik              | 1.26E-06 | 2.13977  |
| NM_008487 | Arhgef2,GEF,Lfc,P40,GEFH1,LFP40,Lbcl1                     | 0.00005  | 7.56607  |
| BG067578  | Arhgef12,Larg,AU019857,KIAA0380,mKIAA0382,2310014B11Rik   | 0.00012  | 1.79323  |
| AK002516  | Arhgdb,D4,Gdid4,Ly-GDI                                    | 2.62E-07 | 2.40751  |
| BG074320  | Arhgap29,Parg1,C76601,AU040217,A830014I19                 | 5.32E-07 | 2.23526  |
| BB546574  | Arhgap28,AU044757,AW550892,E130310N06                     | 9.79E-08 | 7.3465   |
| BC025502  | Arhgap24,MGC38749,0610025G21Rik                           | 8.43E-19 | 3.36113  |
| BE988299  | Arhgap23,4933428G20Rik,A330041B18Rik                      | 2.56E-14 | 2.62192  |
| BG295243  | Arhgap22,RHOGAP2,MGC47316,p68RacGAP,B230341L19Rik         | 0.00005  | 4.8931   |
| BC006592  | Arhgap1,C76222,MGC7050,MGC101942                          | 0.00005  | 1.89771  |
| AV087417  | Arfip1,AW123087,Arfap1in,D3Ert598e,2310030I10Rik          | 3.08E-08 | 1.89213  |
| AK018680  | Arfgap3,Arfgap1,0610009H19Rik,1810004P07Rik,              | 0.00051  | 4.93586  |
| BI248938  | Arf6,AW496366,MGC102530                                   | 0.00006  | 2.06237  |
| BI653265  | Arf4,AA407803                                             | 1.14E-09 | 2.2605   |
| NM_007477 | Arf2                                                      | 1.15E-09 | 1.83648  |
| NM_009704 | Areg,AR,Sdgf                                              | 0.00002  | 5.44282  |
| M11310    | Aprt,C85684,MGC11749                                      | 1.61E-06 | 1.93356  |
| BB553604  | Appbp2,PAT1,AI465480,mKIAA0228,1300003O07Rik              | 6.28E-06 | 2.59472  |
| BB023775  | App,Adap,Cvap,Abeta,amyloid,appican,betaAPP,AL024401,     | 2.03E-06 | 3.60634  |
| AK019319  | Apoe,AI255918                                             | 2.77E-14 | 3.02899  |
| AI848048  | Aplp1                                                     | 1.42E-11 | 4.97694  |
| AV100480  | Apex1,APE,Apex,HAP1,Ref-1                                 | 1.39E-07 | 1.51193  |
| NM_007462 | Apc,Min,AI047805,AU020952,AW124434                        | 1.19E-06 | 4.91199  |
| BB534411  | Apbb2,TR2L,Zfra,Rir1,2310007D03Rik                        | 1.58E-06 | 7.49802  |
| NM_009684 | Apaf1,fog,Apaf-1,Apaf1I,KIAA0413,mKIAA0413,6230400I06Rik  | 0.00074  | 2.70667  |
| NM_009681 | Ap3s1,[s]3A,MGC117528                                     | 0.00048  | 1.92119  |
| BM222025  | Ap3b1,pe,Hps2,rin2,pearl,C78395,AU015684                  | 8.39E-09 | 1.76678  |
| AV271093  | Ap2b1,AI788979,1300012O03Rik                              | 2.07E-06 | 2.90629  |
| AK009735  | Ap2a2,L25,Adtab,C78001,AF006990,AW146353,2410074K14Rik    | 1.18E-06 | 1.9946   |
| BE655707  | Ap1s2,EST1,AI853648,1500012A13Rik                         | 0.00022  | 2.10599  |
| BG230208  | Ap1g1,Adtg,AA409002,AU041323,AW551707,D8Ert374e           | 0.00032  | 3.45879  |
| NM_023617 | Aox3,AOH1,Aoh2,AI326299,1200011D03Rik                     | 1.89E-11 | 8.83632  |
| AK007763  | Aof2,AA408884,mKIAA0601,D4Ert478e,1810043O07Rik           | 5.70E-07 | 3.96213  |
| AV333182  | Anxa7,Anx7,synexin,AI265384,AI316497                      | 1.87E-08 | 3.32798  |
| AK013026  | Anxa6,Anx6,Cabm,Camb,AnxVI,AW107198                       | 3.18E-06 | 3.00485  |
| D63423    | Anxa5,Anx5,R74653                                         | 5.86E-32 | 2.30876  |
| NM_013471 | Anxa4,AIV,Anx4,Xanx-4,AI265406,AW106930                   | 3.89E-23 | 2.82797  |
| AW702161  | Anxa3,Anx3                                                | 8.94E-13 | 3.31009  |
| NM_007585 | Anxa2,Cal1h,AW215814                                      | 2.68E-22 | 2.85043  |
| NM_010730 | Anxa1,Lpc1,Anx-1,Lpc-1,Anx-A1                             | 1.80E-14 | 3.00151  |
| NM_023210 | Anp32e,CPD1,LANPL,LANP-L,mLANP-L                          | 1.81E-16 | 2.4507   |

|           |                                                        |          |          |
|-----------|--------------------------------------------------------|----------|----------|
| NM_130889 | Anp32b,PAL31,Ssp29,PHAPI2a,MGC103080,2410015B15Rik     | 0.00001  | 1.50609  |
| BI690018  | Anln,C78101,Scraps,ANILLIN,1110037A17Rik,2900037I21Rik | 3.68E-06 | 3.91249  |
| BE653749  | Ankrd32,AW545819,MGC102362,C730024G01Rik               | 0.00003  | 1.94849  |
| BC010245  | Ankrd25,MGC7734,AI504612,BC010245,MGC12143             | 0.00026  | 2.55808  |
| BQ032773  | Ankrd15                                                | 6.47E-10 | 2.60591  |
| BF161506  | Ankrd10,AW549277,4833425P12Rik                         | 6.28E-07 | 6.04409  |
| AK009959  | Ankrd1,Alrp,CARP,Crap                                  | 0        | 34.16776 |
| NM_019805 | Anapc7,APC7,AW545589                                   | 4.85E-07 | 1.76691  |
| AV113524  | Anapc1,Apc1,Mcpr,tsg24,AI047775,AI853536,AW547281,     | 0.00005  | 1.62928  |
| AV330806  | Ampd2,Ampd-2,AI552571,1200014F01Rik                    | 1.25E-18 | 3.36312  |
| NM_033603 | Amn,AV002116,5033428N14Rik                             | 0.00008  | 5.26646  |
| BM235514  | Ammecr1,6230420G18Rik                                  | 5.14E-08 | 8.25448  |
| AF253409  | Aldh1a3,V1,ALDH6,RALDH3                                | 2.60E-06 | 9.12359  |
| NM_009652 | Akt1,Akt,PKB,PKB/Akt,PKBalpha                          | 0.00002  | 2.97772  |
| AF177041  | Akr1c12,AI266976                                       | 0.00018  | 8.25208  |
| NM_008012 | Akr1b8,FR-1,Fgrp,Fgfrp                                 | 1.18E-15 | 9.1972   |
| AK009462  | Akr1a4,Akr1a1,2610201A18Rik                            | 1.72E-16 | 2.03673  |
| BC003735  | Akap2,AKAP-KL,AA959716,AI649048,B230340M18Rik          | 0.00074  | 1.63939  |
| BB109690  | Akap13,BRX,LBC,Ht31,AKAP-Lbc,PROTO-LB                  | 0.00028  | 2.00784  |
| AW555068  | Akap11,Gm80,PRKA11,AKAP220,mKIAA0629,6330501D17Rik     | 2.88E-06 | 1.97173  |
| BM120178  | AK129302,Gm372,KIAA1166,MGC105164,mKIAA1166            | 3.22E-17 | 2.7214   |
| AV376983  | AI851076,AL022898,MGC107323,8030451K07,RP23-100P23.2   | 0.00001  | 2.37558  |
| BM240173  | AI788777                                               | 1.27E-06 | 1.93741  |
| AA958965  | AI788669                                               | 1.59E-09 | 2.63781  |
| AV340788  | AI605517                                               | 0.00027  | 2.13533  |
| AK005698  | AI597468                                               | 2.51E-07 | 2.36398  |
| AV381143  | AI585793                                               | 0.00058  | 3.10543  |
| BB191000  | AI505012                                               | 0.00002  | 2.79034  |
| AU018180  | AI481316                                               | 5.11E-08 | 3.52025  |
| AU018180  | AI481316                                               | 0.00036  | 2.11881  |
| BB234337  | AI467606                                               | 0.0001   | 6.22004  |
| BB234337  | AI467606                                               | 0.00001  | 2.70293  |
| BB795235  | AI427138                                               | 0.00029  | 1.86574  |
| BE632903  | AI426953                                               | 0.00066  | 3.50099  |
| NM_134044 | AI413782                                               | 2.11E-06 | 1.92273  |
| BB494618  | AI413782                                               | 0.00026  | 1.68875  |
| AV246911  | AI413331                                               | 3.20E-10 | 2.99672  |
| BI453502  | AI315068,AU040738,MGC38232,mKIAA0804                   | 0.00009  | 2.31427  |
| BE991175  | AI314604                                               | 2.42E-07 | 5.33731  |
| BE989096  | Ahr,Ah,ln,Ahh,Ahre                                     | 2.28E-18 | 3.38661  |
| BQ175532  | Ahi1,Ahi-1,D10Bwg0629e,1700015F03Rik                   | 4.05E-10 | 4.7002   |
| BB534486  | Agtr1b,AT1B,AT2R1B,Agtr-1b,Angtr-1b,MGC129325          | 4.05E-10 | 9.03061  |
| BM208224  | Agrn                                                   | 6.93E-08 | 2.4347   |
| AK005139  | Agpat4,1500003P24Rik                                   | 0.00029  | 2.3804   |
| NM_007424 | Agc1,Agc,cmd,Cspg1                                     | 1.13E-15 | 13.41537 |
| BM239026  | Aff3,Laf4,LAF-4,3222402O04Rik                          | 0.00002  | 2.68906  |
| NM_009636 | Aebp1,ACLP                                             | 0.0001   | 4.38384  |
| NM_007422 | Adss,Adss2,AI314886                                    | 3.04E-13 | 2.18209  |
| AI503324  | Adprh1,Arh2,D330008N11Rik                              | 8.83E-08 | 5.19531  |
| AF244347  | Adprh,Arh1                                             | 2.94E-06 | 1.57801  |
| AV330236  | Add1,AI256389                                          | 0.00032  | 2.26306  |
| NM_007406 | Adcy7,AA407758                                         | 1.62E-13 | 19.81036 |
| BQ176297  | Adcy7,AA407758                                         | 0.00065  | 2.21936  |
| BG063470  | Adamts9,AW743315,1810011L16Rik,                        | 4.47E-13 | 4.44246  |
| AL359935  | Adamts7,ADAM-TS7,ADAMTS7B                              | 2.43E-07 | 3.43608  |
| AV286717  | Adamts6,ADAM-TS6,5031426K13,A930019D11Rik              | 8.45E-30 | 15.45025 |
| BB443585  | Adamts4,ADMP-1,ADAM-TS4,ADAMTS-2,mKIAA0688,3830423K05  | 2.39E-18 | 16.70441 |
| BB004039  | Adamts12,AI605170,ADAMTS-12                            | 9.95E-06 | 2.35703  |
| NM_021475 | Adamdec1,Dcsn,AI574231,2210414L24Rik                   | 0        | 100      |
| AW107807  | Adam32                                                 | 1.15E-06 | 3.19822  |
| NM_009616 | Adam19,M[b],Mltnb,AL024287                             | 5.37E-21 | 8.04148  |
| C76813    | Adam17,Tace,CD156b                                     | 1.49E-08 | 2.82354  |
| NM_007400 | Adam12,M[a],Mltna,KIAA4001,mKIAA4001                   | 4.74E-06 | 3.21644  |
| AV327574  | Adam10,kuz,MADM,kuzbanian,1700031C13Rik                | 0.00013  | 1.7161   |
| BB818297  | Acvr2a,Acvr2,ActRlla,tActRll                           | 0.00028  | 1.9486   |
| NM_007394 | Acvr1,ALK2,Acvr,Alk8,SKR1,Alk-2,                       | 8.81E-09 | 4.69867  |

|           |                                                          |          |          |
|-----------|----------------------------------------------------------|----------|----------|
| BE372352  | Actr3,Arp3,MGC118188,1200003A09Rik                       | 1.38E-06 | 2.04964  |
| AK014859  | Actr2,Arp2,AA409782,MGC36604,D6Etrd746e,4921510D23Rik    | 2.00E-12 | 2.07012  |
| NM_016860 | Actr1a,Arp1,alpha-Arp1                                   | 2.15E-07 | 2.19484  |
| BM234779  | Actn4,C77391,MGC102374                                   | 0.0002   | 2.51707  |
| BC003232  | Actn1,3110023F10Rik                                      | 8.92E-06 | 5.63422  |
| AK013221  | Actl6a,Actl6,Baf53a,C79802,AI851094,2810432C06Rik        | 0.00002  | 2.04324  |
| AW537707  | Actb,Actx,beta-actin,E430023M04Rik                       | 2.26E-09 | 2.70894  |
| NM_007392 | Acta2,Actvs,a-SMA,0610041G09Rik                          | 5.52E-30 | 2.67016  |
| AK006541  | AcsI5,ACS2,ACS5,Faci5,1700030F05Rik                      | 1.99E-06 | 1.98152  |
| AB033886  | AcsI4,ACS4,Faci4,Lacs4,AU018108,9430020A05Rik            | 4.29E-10 | 4.52246  |
| AK012088  | AcsI3,ACS3,Faci3,C85929,PRO2194,2610510B12Rik            | 0.00002  | 2.60743  |
| BB008092  | Acpp,Lap,PAP,Ppal,AI324033,A030005E02Rik                 | 0.00012  | 4.76333  |
| BB183525  | Acpl2,BB177120,MGC38214,9430094M07Rik                    | 2.57E-10 | 6.27551  |
| NM_019736 | Acot9,U8,p48,Acate2,C76421,MT-ACT48,0610041P13Rik        | 1.69E-08 | 1.55322  |
| NM_022816 | Acot10,p48,Acate3,MT-ACT48,MGC124133,MGC124134           | 3.99E-21 | 1.86381  |
| AW743006  | Accn3,ASIC3,TNAC1,DRASIC,SLNAC1,AW742291                 | 1.44E-10 | 9.567    |
| BB621938  | Abtb2,AW539457                                           | 5.77E-13 | 2.22767  |
| BB422726  | Abr,AU042359,6330400K15Rik                               | 1.28E-21 | 1.90195  |
| BM900139  | AbIim3,AW990719,KIAA0843,MGC69876,D930036B08Rik          | 0.00003  | 1.5235   |
| AK008928  | Abi3,NESH,AI987680,2210414K06Rik                         | 0.00015  | 3.77254  |
| BB051811  | Abi2,AI839867,MGC90836,MGC90855,C130078H13,8430425M24Rik | 0.0001   | 3.83148  |
| AW912678  | Abi1,E3B1,NAP1,MGC6064,Ssh3bp1                           | 0.00004  | 1.61697  |
| NM_018811 | Abhd2,LABH2,Labh-2,MGC107122,2210009N18Rik               | 0.00037  | 5.42702  |
| AV309591  | Abcf1,Abc50,GCN20,AU041969,D17Wsu166e                    | 0.00097  | 4.04388  |
| AV256613  | Aard,A5D3,AV328152,MGC107188                             | 2.90E-07 | 7.90407  |
| AW476171  | AA959742,C78668,RP23-290B5.2                             | 3.23E-14 | 1.77055  |
| U73200    | AA536749,RIP3,C76423,Rhoip3,p116Rip                      | 2.42E-30 | 2.55115  |
| BI248354  | AA536743                                                 | 1.77E-10 | 2.9362   |
| BG063085  | AA409587                                                 | 0.00096  | 1.75655  |
| BG070043  | AA408296,AW045375                                        | 2.78E-09 | 2.34464  |
| BG063148  | AA407270,AV006038                                        | 0.00003  | 1.89849  |
| BE632850  | A930038C07Rik                                            | 0.00003  | 3.28545  |
| BB283644  | A930025H08Rik                                            | 0.00046  | 3.04986  |
| BB277600  | A930006D11                                               | 0.0003   | 2.75368  |
| BG073439  | A830073O21Rik                                            | 1.77E-10 | 3.16099  |
| BB561008  | A730017D01Rik                                            | 5.11E-06 | 4.04916  |
| BB238335  | A630071D13Rik,AI848282                                   | 0.00005  | 2.80767  |
| BC011135  | A630065K24Rik,MGC19056                                   | 0.00003  | 5.5559   |
| BB391874  | A630033E08Rik,C730040L01Rik                              | 2.09E-10 | 10.4316  |
| BG064632  | A4galt                                                   | 1.53E-12 | 15.20332 |
| X01134    | A430107P09Rik,TRAV9-3                                    | 0.00033  | 4.08581  |
| BB470362  | A430107O13Rik,6720481P07                                 | 0.00017  | 2.27597  |
| BB498608  | A430106J12Rik,Ape,Giv,Hkrp1,                             | 1.60E-19 | 3.18238  |
| AV016279  | A330104H05Rik,AI854460,KIAA1189,MGC107206,mKIAA1189      | 9.72E-13 | 8.87551  |
| BB446952  | A330103N21Rik                                            | 0.00011  | 2.55251  |
| AW455902  | A230083H22Rik,KIAA0367,mKIAA0367,6330414G02Rik           | 1.37E-12 | 7.8271   |
| BB387783  | A230046K03Rik,AA589518,mKIAA1033                         | 2.67E-21 | 2.16024  |
| BB119177  | A130040M12Rik,VL30,CA782090,VL30 retroelement            | 0.00035  | 2.71469  |
| BI149851  | A130022J15Rik,AI447490,AW214473,AW259391                 | 1.40E-07 | 2.88359  |
| AK018112  | 9930013L23Rik,AY007814,12H19.01.T7,6330404C01Rik         | 2.13E-14 | 22.27715 |
| BB131315  | 9630050M13Rik,AA409679                                   | 1.02E-08 | 2.70331  |
| BC027796  | 9630042H07Rik                                            | 7.00E-25 | 3.13082  |
| BB667304  | 9630020C08Rik                                            | 0.00058  | 4.2247   |
| BB102291  | 9430081I23Rik                                            | 3.61E-12 | 3.39357  |
| BQ175905  | 9430080K19Rik,AU043147,AW046177                          | 4.24E-06 | 2.97244  |
| BG865652  | 9430077D24Rik                                            | 3.11E-10 | 1.61527  |
| AK020485  | 9430073N08Rik                                            | 1.31E-12 | 5.46231  |
| AV374669  | 9430063L05Rik,C87016,KIAA0477,mKIAA0454,4732458A06Rik    | 8.87E-08 | 2.84185  |
| BB094583  | 9430047G12Rik,AW742331,AW743025                          | 0.00007  | 2.05856  |
| AV162270  | 9430041P20Rik                                            | 4.67E-13 | 5.12507  |
| BM220702  | 9430028L06Rik,5930434P17                                 | 1.90E-24 | 12.42806 |
| AJ414562  | 9430022F06Rik,Cx39,connexin 39                           | 0.00005  | 4.91649  |
| AK020412  | 9430012M22Rik                                            | 2.31E-20 | 14.68779 |
| BB169371  | 9330118A15Rik                                            | 5.27E-08 | 4.81369  |
| BB075402  | 9330107J05Rik                                            | 1.68E-10 | 8.29194  |
| AI467525  | 9230110C19Rik                                            | 9.03E-06 | 2.67492  |

|           |                                                         |          |          |
|-----------|---------------------------------------------------------|----------|----------|
| AK018685  | 9130422G05Rik,AI450603,AW215585                         | 2.20E-17 | 7.15849  |
| BF166604  | 9130404D14Rik                                           | 4.94E-40 | 6.58144  |
| AK018610  | 9130011J15Rik                                           | 0.00075  | 1.52547  |
| NM_026667 | 9130005N14Rik,MGC117924,1190001N04Rik                   | 0.00004  | 2.36957  |
| AV373606  | 9030625A04Rik                                           | 1.02E-06 | 3.46068  |
| BC007154  | 9030624J02Rik,2610029J22Rik                             | 0.0007   | 1.65211  |
| BG797916  | 9030425L15Rik                                           | 0.00001  | 2.91988  |
| BG072972  | 9030425E11Rik,ACAM,ASP5,CLMP,AW557819                   | 1.42E-07 | 2.24153  |
| BC021408  | 9030416H16Rik,mKIAA0648,E230024D05Rik                   | 1.52E-31 | 2.53643  |
| BM221159  | 8430438M01Rik,AW108467                                  | 0.00011  | 4.92084  |
| BC007160  | 8430437G11Rik,AI462344,AI504145,5730526F17Rik           | 0.00013  | 1.97103  |
| AK018466  | 8430436O14Rik                                           | 0.00018  | 1.57927  |
| BG066131  | 8430420C20Rik                                           | 8.07E-06 | 2.42442  |
| BG141912  | 8430417A20Rik                                           | 8.14E-14 | 2.84563  |
| BB003393  | 8030463A06Rik                                           | 5.17E-19 | 19.78017 |
| AV352121  | 7030402D04Rik                                           | 1.09E-06 | 1.80236  |
| NM_026551 | 6720485C15Rik,AI849483,FLJ22955,3010024O21Rik           | 0.00055  | 2.35287  |
| AW549928  | 6720475J19Rik                                           | 0.00007  | 2.82619  |
| AV350862  | 6720467C03Rik                                           | 9.38E-07 | 2.9503   |
| AK020138  | 6720463M24Rik,AI317232                                  | 0.00003  | 4.12586  |
| BC011208  | 6530411B15Rik,AI463522,RP23-480G5.1                     | 5.63E-24 | 9.43968  |
| AK018285  | 6430590I03Rik                                           | 0.00002  | 3.2868   |
| BM248637  | 6330583I20Rik                                           | 0.00008  | 1.95528  |
| BM502719  | 6330549D23Rik                                           | 2.29E-10 | 3.33271  |
| AV328515  | 6330442E10Rik,AU019070,9830138K24                       | 0.00009  | 3.81828  |
| BG066220  | 6330412F12Rik,BS4,Nub1,NY-REN-18,4931404D21Rik          | 0.00097  | 2.58579  |
| BB345680  | 6230400D17Rik                                           | 0.00024  | 2.66757  |
| AV343569  | 6030443C007Rik,AU014917,3632432H19                      | 2.55E-06 | 2.47649  |
| BM123748  | 6030408C04Rik,AW046379,mKIAA1333,9030416F18,            | 0.00002  | 3.08599  |
| BB037457  | 5930427L02Rik                                           | 5.80E-07 | 9.66093  |
| BB309117  | 5930418K15Rik,mKIAA1423                                 | 3.17E-11 | 4.06953  |
| BB457797  | 5930412E23Rik                                           | 0.00053  | 2.0773   |
| AK014262  | 5830472M02Rik,3110080A02Rik                             | 1.61E-14 | 3.09199  |
| AI314626  | 5830471E12Rik,AI314065,AI464126                         | 5.41E-07 | 2.59277  |
| BB165850  | 5830443J22Rik                                           | 0.0006   | 2.10432  |
| AV316469  | 5830436I19Rik                                           | 8.13E-06 | 4.50497  |
| BM202530  | 5830428H23Rik                                           | 0.00002  | 1.55682  |
| BF142017  | 5730601F06Rik,5330440G10Rik                             | 0.00009  | 1.58856  |
| AK017795  | 5730528L13Rik,2410046L14Rik,2810429P03Rik               | 0.00004  | 7.38814  |
| BB702347  | 5730507H05Rik,Hcapg,MFT.M05.13                          | 3.11E-06 | 13.92915 |
| BC004090  | 5730470L24Rik,AI839862,2810005O12Rik                    | 2.47E-06 | 2.34969  |
| BE308547  | 5730427N09Rik,Yr29,LNR42,Nsa2p,MGC118054                | 2.42E-14 | 1.50522  |
| BB257344  | 5730408K05Rik                                           | 0.00018  | 2.16673  |
| AK014201  | 5730405I09Rik,1700025H17Rik,3110050L10Rik,4631402G10Rik | 0.00011  | 1.93715  |
| NM_134114 | 5630401J11Rik,AA409698,MGC102361,RP23-29H5.3            | 1.74E-06 | 1.71219  |
| BB128517  | 5430435G22Rik                                           | 7.64E-11 | 4.98317  |
| AK017390  | 5430434G16Rik                                           | 4.97E-11 | 2.50669  |
| BB322233  | 5430433G21Rik,AV354986                                  | 0.00015  | 5.01914  |
| AK005776  | 5430432M24Rik,AI747080,MGC30344,1700008J10Rik           | 0.00028  | 8.27239  |
| BB028755  | 5430417L22Rik                                           | 0.00007  | 2.53884  |
| AI120070  | 5430406M13Rik,AI607429                                  | 0.00001  | 4.47845  |
| AK017277  | 5430405N12Rik                                           | 0.00051  | 2.1027   |
| AU067780  | 5330421F07Rik,AU067780,mKIAA3015                        | 0.00005  | 4.25614  |
| AK019900  | 5330421C15Rik                                           | 1.02E-06 | 2.55566  |
| AK017223  | 5133401H06Rik                                           | 0.00028  | 3.69764  |
| AI553303  | 5033418A18Rik                                           | 0.0005   | 2.39102  |
| BM241735  | 5031439A09Rik,AI173978,AI987742                         | 0        | 8.5732   |
| AK017143  | 5031425E22Rik                                           | 1.83E-12 | 2.86157  |
| AV303037  | 4933440N22Rik                                           | 3.91E-08 | 1.60898  |
| BB085906  | 4933439C20Rik,MGC65558,MGC103350                        | 6.77E-06 | 2.30738  |
| AK013967  | 4933434L15Rik,MGC74393                                  | 1.88E-18 | 5.76944  |
| AK017056  | 4933434I06Rik,AU016229,MGC117794                        | 3.49E-06 | 4.93878  |
| AK017049  | 4933433P14Rik,FLJ20789                                  | 9.57E-09 | 4.34608  |
| BB667633  | 4933430F16Rik                                           | 8.30E-06 | 2.49988  |
| BM199807  | 4933427D14Rik,C85113,RP23-207N15.3                      | 2.10E-08 | 4.27637  |
| BB361436  | 4933426L22Rik,Cep170,AI195353,A330004A13Rik             | 7.97E-09 | 2.82456  |



|           |                                                    |          |          |
|-----------|----------------------------------------------------|----------|----------|
| AK016704  | 4933406N12Rik,AI413378                             | 0.00013  | 2.21482  |
| AW049283  | 4932442K08Rik,AW049283,AW413338,KIAA1838           | 0.00019  | 2.17384  |
| AK015136  | 4932415G12Rik                                      | 8.24E-06 | 3.7877   |
| BC005731  | 4931428D14Rik,2300003H10,RP23-393O10.2             | 1.91E-06 | 1.51087  |
| BG063053  | 4930595D18Rik                                      | 2.91E-08 | 2.79108  |
| BB510904  | 4930520K10Rik                                      | 0.00009  | 2.54246  |
| AV266695  | 4930519N13Rik,Gm1004,Gm1634,mKIAA0980              | 0.00068  | 3.57031  |
| BB472574  | 4930512H18Rik                                      | 0.00003  | 2.45666  |
| AI450962  | 4930503L19Rik,BB148262,9930107F24                  | 5.09E-07 | 3.64928  |
| BG073177  | 4930470D19Rik,AI608258                             | 0        | 2.06595  |
| AV209678  | 4930451A13Rik,W51689,AU015720,AU043671,AU043778    | 0.00003  | 2.15236  |
| BB167877  | 4930428B01Rik                                      | 0.00048  | 6.99349  |
| BG068263  | 4930422I07Rik                                      | 0.00005  | 2.65843  |
| C78926    | 4930402H24Rik,C78926,AI413763,2810487F15Rik        | 0.00006  | 2.38386  |
| AI835491  | 4921533L14Rik,AI835491,KIAA1411                    | 0.00001  | 2.07745  |
| AK019545  | 4921529O18Rik,4930432K16Rik                        | 0.00021  | 4.42797  |
| BG073340  | 4921524J06Rik,Salf,Sblf,C86231                     | 4.93E-21 | 2.80801  |
| BM116703  | 4921517N04Rik,AU014935,BB233739,E430033K04Rik      | 0.00003  | 1.84179  |
| AK014883  | 4921513I08Rik                                      | 0.00014  | 3.04324  |
| AK014853  | 4921509J17Rik,6330544N02Rik                        | 2.50E-12 | 4.08454  |
| AK014817  | 4921505D17Rik                                      | 0.00031  | 1.93523  |
| BB167921  | 4921504N20Rik,mszf31,mszf89                        | 0.00008  | 1.58862  |
| NM_133923 | 4833441J24Rik,AI450050                             | 0.00055  | 2.57945  |
| AV251009  | 4833428M15Rik                                      | 3.76E-08 | 4.74696  |
| AW764291  | 4833423F13Rik                                      | 5.88E-08 | 5.27661  |
| BG067119  | 4833420G17Rik,C85193,AW107518,2210017J06Rik        | 1.66E-14 | 8.59892  |
| AV250006  | 4833420G11Rik,AI451474                             | 0.00002  | 1.70222  |
| BI076733  | 4833417J20Rik                                      | 1.34E-06 | 5.80752  |
| BM239430  | 4833416J08Rik                                      | 4.96E-06 | 2.17395  |
| AW910504  | 4833416E15Rik,AI428932                             | 2.62E-19 | 7.57688  |
| AV112912  | 4833408C14Rik,AI447451                             | 0.0002   | 1.5189   |
| BB012037  | 4832420M10                                         | 5.52E-10 | 15.5859  |
| BB004441  | 4732460K03Rik,AI448302,mKIAA0543                   | 7.67E-06 | 2.42293  |
| BB463610  | 4632434I11Rik                                      | 0.00013  | 4.638    |
| BC003967  | 4632428N05Rik                                      | 0.0003   | 2.4155   |
| AV227569  | 4632419I22Rik,RP23-50E4.1                          | 1.55E-07 | 3.18793  |
| BG067859  | 4632413K17Rik,Os-9,AU022351,1300007E20             | 1.38E-06 | 1.93493  |
| AK019480  | 4632404H22Rik,AI256344                             | 1.04E-29 | 7.40123  |
| AK019474  | 4631426J05Rik,BRAG,mKIAA0598                       | 9.05E-07 | 6.93603  |
| AK014527  | 4631422C13Rik,D430014P18Rik                        | 0.00006  | 3.27705  |
| BI695596  | 4121402D02Rik,AA682082,2810017F12Rik,4930463F05Rik | 0.00028  | 1.88238  |
| BC005522  | 3830408P06Rik,Drim,mDRIN,AA617408                  | 0.00001  | 1.98148  |
| BF228051  | 3321401G04Rik,AI848529,KIAA0738,A230020K05Rik      | 0.00029  | 4.521    |
| BG066193  | 3230402G14Rik                                      | 2.02E-06 | 4.25886  |
| BE225664  | 3222401M22Rik,KIAA0084,2700010E02Rik               | 9.60E-15 | 6.63409  |
| BE198251  | 3110050N22Rik,AI790358,AU023959,MGC90536           | 0        | 10.22604 |
| AK014167  | 3110041P15Rik                                      | 2.12E-06 | 5.19294  |
| AK014134  | 3110037I16Rik,AV297100                             | 0.00007  | 2.50083  |
| BB753814  | 3110027N22Rik                                      | 0.00029  | 3.60147  |
| AK013984  | 3110003A17Rik,MGC107537,1700028I04Rik              | 8.08E-07 | 3.74129  |
| AK019372  | 3000003F02Rik                                      | 1.02E-06 | 2.28254  |
| AK013855  | 3000002B06Rik,Gm331,MEGF10                         | 3.33E-19 | 17.41666 |
| AK013788  | 2900075A18Rik                                      | 0.0008   | 2.72304  |
| NM_026064 | 2900073G15Rik,C80200,AI838292                      | 4.17E-19 | 2.88667  |
| BB532219  | 2900073C17Rik                                      | 1.42E-27 | 10.45305 |
| BG063651  | 2900070H08Rik                                      | 0.00008  | 3.3309   |
| AV153660  | 2900056M20Rik                                      | 0.00022  | 2.50263  |
| BI739725  | 2900045N06Rik,C85544,FLJ10707,MGC90828,            | 3.73E-15 | 2.38757  |
| AK019313  | 2900011L18Rik                                      | 4.49E-11 | 4.51531  |
| AK013495  | 2900006N09Rik,MGC54823,9230106G13Rik               | 0.00009  | 3.2245   |
| BM232998  | 2810474O19Rik,GET,AA536804,AU020969,               | 1.34E-18 | 4.69608  |
| AW045947  | 2810457I06Rik,p70,BB125008                         | 0.00005  | 2.75807  |
| BQ175669  | 2810455D13Rik                                      | 0.0002   | 1.62196  |
| BB168446  | 2810446P07Rik,AI843389                             | 9.80E-06 | 2.25295  |
| AF332866  | 2810441K11Rik,AI482550,1110017C22Rik               | 0.00064  | 2.4862   |
| AK017673  | 2810417H13Rik,Ns5apt9,Ns5atp9,AA409629,            | 9.58E-08 | 4.95411  |

|           |                                                        |          |         |
|-----------|--------------------------------------------------------|----------|---------|
| AK013101  | 2810417D08Rik,AA408260,AI987735,mKIAA1287              | 6.11E-13 | 2.06888 |
| AK013345  | 2810402A17Rik,AI448995,AI841128,2310046F18Rik          | 0.00003  | 3.69955 |
| NM_133746 | 2810048G17Rik                                          | 8.25E-06 | 1.79112 |
| BM232345  | 2810028N01Rik                                          | 0.00031  | 1.97707 |
| AK012825  | 2810026P18Rik,4933428I09Rik                            | 2.67E-06 | 1.99448 |
| BC014764  | 2810022L02Rik,AA987173,AI480531,AI842453,AW413586      | 1.77E-10 | 4.1725  |
| BE951772  | 2700083E18Rik,Gm411,AA387377                           | 1.20E-10 | 2.80618 |
| BB480651  | 2700050L05Rik,AU022667,AW558805,MGC27934,MGC58090      | 0.00081  | 5.27573 |
| AV127581  | 2700049H19Rik,AI848570                                 | 3.03E-17 | 4.07107 |
| AV122663  | 2610528G24Rik                                          | 1.21E-18 | 2.79135 |
| AW494389  | 2610524H06Rik                                          | 2.18E-07 | 4.26586 |
| BI082843  | 2610524G07Rik,Preli                                    | 3.77E-15 | 2.99809 |
| BM293412  | 2610319H10Rik                                          | 3.54E-29 | 3.56048 |
| BB703070  | 2610312B22Rik,FM22,Ierepo4,1700006A17Rik,1810012H02Rik | 0.00024  | 1.76425 |
| AV300716  | 2610307O08Rik                                          | 4.41E-07 | 7.41757 |
| BB538449  | 2610300B10Rik,AW121806,AW550697                        | 0.00001  | 3.63342 |
| BI104583  | 2610208M17Rik,MGC6869,BC004835,MGC101949               | 0.00009  | 1.64099 |
| BM234799  | 2610204M08Rik,AA589465,AW125550,MGC107363              | 0.00008  | 1.86255 |
| BM220421  | 2610203C20Rik                                          | 8.41E-07 | 3.3962  |
| BM247469  | 2610101N10Rik                                          | 0.00001  | 1.5283  |
| AK012533  | 2610039C10Rik,MGC100039,2810018N07Rik                  | 1.34E-07 | 2.99983 |
| BB085604  | 2610031L17Rik,MGC11655,MGC36967,MGC38351,1190003A07Rik | 9.60E-06 | 1.8196  |
| BB429625  | 2610030H06Rik,AI840175                                 | 1.65E-06 | 2.08927 |
| BI409701  | 2610027C15Rik,MGC36197                                 | 2.35E-07 | 2.92498 |
| AK011480  | 2610020C11Rik,mszf12,AI327407,mszf23-1,A630094N24Rik   | 0.00055  | 2.61582 |
| AK011474  | 2610019P18Rik                                          | 6.98E-06 | 2.50753 |
| BE692399  | 2610005L07Rik,2810038F24Rik,6720476A01Rik              | 0.00074  | 2.72058 |
| AK011292  | 2610002J23Rik,AI746380,AW546936,C230060L03Rik          | 0.00002  | 1.79132 |
| AV218922  | 2610002J02Rik                                          | 5.08E-08 | 5.00953 |
| BG074158  | 2610001E17Rik,Urb,Ssg1                                 | 1.70E-08 | 2.1118  |
| AV328634  | 2600003E23Rik,Afap,AI848729,mKIAA3018,9630044L16Rik    | 0.00001  | 1.96416 |
| AV109006  | 2510049I19Rik,AW822030                                 | 6.37E-07 | 2.34712 |
| AV107461  | 2510038A11Rik,S19BP,AI604923                           | 1.91E-06 | 2.13351 |
| BC011230  | 2510015F01Rik                                          | 2.27E-15 | 6.22034 |
| BB770006  | 2410193C02Rik,P7                                       | 0.0001   | 2.19333 |
| AK010736  | 2410081M15Rik,AI480941                                 | 4.33E-06 | 2.45526 |
| BB143137  | 2410042D21Rik,AA166487,AA473307,AI467442               | 3.73E-22 | 5.67486 |
| AK010551  | 2410018M08Rik                                          | 0.00014  | 6.67154 |
| C76835    | 2410018L13Rik,2810480C08Rik                            | 0.00069  | 2.4522  |
| AA939619  | 2410006H16Rik                                          | 1.60E-06 | 2.84661 |
| BB772929  | 2410002O22Rik,AI451892,AU017229,2610524F24Rik          | 0.00073  | 1.75807 |
| BC016099  | 2410002F23Rik                                          | 0.00004  | 2.70372 |
| BB197581  | 2310076G05Rik                                          | 0.00036  | 6.26165 |
| AK010185  | 2310075M15Rik,C85409,mKIAA0230,E330004E07              | 0.00005  | 2.53084 |
| BI734389  | 2310067E08Rik,C85344,2210414F18Rik                     | 1.38E-33 | 4.59535 |
| BG061080  | 2310050P20Rik                                          | 4.24E-06 | 3.15572 |
| BC022925  | 2310050N11Rik                                          | 1.08E-10 | 1.88051 |
| NM_024185 | 2310047O13Rik,AI447827,AW111958,1810041E18Rik          | 0.00052  | 1.73412 |
| BM231657  | 2310047C04Rik,A230104G20,6430549P11Rik                 | 4.42E-07 | 2.51044 |
| AK009785  | 2310043M15Rik                                          | 0.00015  | 2.23197 |
| AK009756  | 2310042L06Rik,AW208859                                 | 0.00007  | 2.61429 |
| NM_026509 | 2310039E09Rik,MGC107637                                | 1.78E-10 | 2.47567 |
| BE981853  | 2310037P21Rik                                          | 3.58E-10 | 7.0488  |
| BB526046  | 2310035C23Rik,mKIAA1468,6430401N10                     | 0.00005  | 1.90485 |
| NM_025864 | 2310028N02Rik,AI118576                                 | 0.00051  | 3.47206 |
| BI328156  | 2310022B05Rik                                          | 2.40E-43 | 3.80226 |
| BC019664  | 2310016C16Rik,AU017063                                 | 8.57E-20 | 2.97689 |
| AK009333  | 2310014D11Rik,AA589508,AI256723                        | 4.51E-24 | 2.73671 |
| NM_025509 | 2310008M10Rik,5730557H03Rik                            | 1.12E-11 | 1.90825 |
| BC026877  | 2310008H04Rik,MGC30630,MGC115787                       | 2.42E-06 | 4.16359 |
| BG070464  | 2310007F12Rik                                          | 0.00001  | 1.69898 |
| AW495410  | 2310003P10Rik,AI314202,AI317350                        | 0.00047  | 1.54654 |
| BI157086  | 2300006M17Rik                                          | 8.04E-22 | 6.67133 |
| BE457744  | 2210412D01Rik,AL023007                                 | 1.80E-08 | 3.1745  |
| BG067388  | 2210410P13Rik,C86188,AI415447                          | 0.00005  | 1.96873 |
| BM207133  | 2210409B22Rik                                          | 3.03E-31 | 3.75776 |

|           |                                                      |          |          |
|-----------|------------------------------------------------------|----------|----------|
| AK008825  | 2210404D11Rik,AI462440,mKIAA0887                     | 0.0002   | 2.37722  |
| BE852759  | 2210020M01Rik                                        | 3.59E-08 | 15.64048 |
| AV075452  | 2210013M04Rik,AW046744                               | 3.82E-07 | 8.13319  |
| AK008617  | 2200002D01Rik,IMUP,H2RSP,IMUP-1,IMUP-2,2010005J02Rik | 5.02E-13 | 16.47499 |
| AF353245  | 2010315L10Rik,Ed2,mED2,AV002165,5730403H22Rik        | 3.87E-18 | 1.52959  |
| AK008415  | 2010200O16Rik                                        | 0.00011  | 1.99479  |
| BC027288  | 2010111I01Rik,Aopep,2300006M17Rik                    | 3.18E-23 | 3.51621  |
| AK008392  | 2010110P09Rik,Chp2,Cbhp2                             | 3.74E-24 | 13.69292 |
| BB174749  | 2010109K11Rik,AV375874                               | 0.00015  | 1.70528  |
| AK008190  | 2010011I20Rik,AI430961,AV108736                      | 7.56E-08 | 2.51632  |
| AV325310  | 2010003J03Rik,AI131644                               | 0.00072  | 1.84445  |
| BI963682  | 2010002N04Rik,cl-41,AI195350,AW561905                | 1.89E-13 | 7.32677  |
| BB275943  | 1810057P16Rik,E130302J09Rik                          | 1.16E-12 | 3.92643  |
| BB397062  | 1810054D07Rik,AV103077,RP23-17O21.2                  | 4.95E-06 | 6.90944  |
| AV273819  | 1810048J11Rik,AU017192,4932413O10                    | 0.00002  | 4.59856  |
| BQ177117  | 1810041L15Rik                                        | 0.00009  | 3.56474  |
| AK017572  | 1810036I24Rik,RP23-428I5.3                           | 2.90E-08 | 1.739    |
| BG069448  | 1810035L17Rik                                        | 0.00013  | 1.67937  |
| BG921306  | 1810030O07Rik                                        | 2.19E-08 | 2.07917  |
| AK007503  | 1810015A11Rik,4930521M19Rik                          | 3.03E-07 | 3.26184  |
| NM_133706 | 1810014L12Rik,AI115531,AL022956,MGC102369,           | 0.00001  | 9.51861  |
| AK017634  | 1810014B01Rik                                        | 0.0002   | 2.03259  |
| NM_023056 | 1810009M01Rik,Lr8,Clast1                             | 0        | 8.82172  |
| BE994488  | 1810006K23Rik                                        | 0        | 2.85547  |
| BB476677  | 1700065D16Rik                                        | 3.05E-09 | 2.38661  |
| BC024705  | 1700054N08Rik,AI853424                               | 0.00092  | 3.76654  |
| AV296285  | 1700051C09Rik,MGC11788,4921513J16Rik,5430417M23Rik   | 1.57E-06 | 1.69749  |
| AB047759  | 1700036D21Rik,79H19A,TESSP-4,AU043574,AU043597       | 0.00069  | 4.07013  |
| AV259599  | 1700029I08Rik,AV259599                               | 0.00004  | 5.79215  |
| BC019423  | 1700027N10Rik                                        | 0.00011  | 4.60187  |
| AK006115  | 1700019E19Rik,R75064                                 | 0.00094  | 1.73425  |
| BI690175  | 1700018M17Rik                                        | 3.73E-25 | 2.04419  |
| BG920261  | 1700017D01Rik                                        | 6.21E-07 | 4.56949  |
| AW488914  | 1700016A09Rik                                        | 0.00051  | 3.91378  |
| BE952061  | 1700014B07Rik                                        | 0.00025  | 3.11834  |
| BB496291  | 1700012H17Rik,AW049855,5031405P22                    | 0.00001  | 2.18991  |
| AW121714  | 1700010H15Rik,Dnal1,AW121714,E330027P08Rik           | 2.57E-06 | 1.86147  |
| AK005772  | 1700008I05Rik,TCP11,C77164                           | 1.10E-10 | 6.60708  |
| AV210477  | 1700003F12Rik                                        | 2.83E-08 | 6.29568  |
| AK005401  | 1600002O04Rik,AK129450,KIAA1822,mKIAA1822            | 2.01E-09 | 6.80303  |
| NM_023831 | 1500035H01Rik,R75047,c11orf2,AA408110,AI663846       | 1.27E-11 | 2.24437  |
| BC019498  | 1500011H22Rik                                        | 0.00023  | 2.33959  |
| AV216011  | 1500009L16Rik,2700050C19Rik                          | 6.30E-32 | 13.92392 |
| BQ174720  | 1500005P14Rik,AI844915                               | 4.84E-23 | 3.88155  |
| AI467583  | 1300007F04Rik                                        | 0.00005  | 2.78813  |
| BG297038  | 1300007C21Rik,gag protein,murine leukemia retrovirus | 0.00011  | 3.01859  |
| AK007779  | 1300007B12Rik,1700020N19Rik                          | 5.01E-06 | 2.27481  |
| BI076834  | 1200016E24Rik                                        | 0.00018  | 3.75088  |
| BB252479  | 1200011O22Rik,AU042569,AW548074                      | 1.41E-07 | 2.11402  |
| AK006283  | 1200009F10Rik,lkip,D18354,1700023M03Rik              | 0.00004  | 1.929    |
| AK004655  | 1200008O12Rik,2700032M20Rik                          | 0.00029  | 4.0568   |
| AV309085  | 1190002N15Rik                                        | 0.00015  | 2.59502  |
| AV224550  | 1110067M19Rik                                        | 4.48E-20 | 21.63213 |
| BM120737  | 1110064P04Rik,AI450991,FLJ36626                      | 2.08E-07 | 1.99427  |
| AV015858  | 1110059M19Rik                                        | 2.15E-19 | 32.25096 |
| BB766817  | 1110059G02Rik                                        | 0.00001  | 3.24713  |
| BE307471  | 1110055N21Rik,mKIAA1698                              | 0.00022  | 1.56308  |
| AV014636  | 1110055J05Rik                                        | 0.00001  | 5.08976  |
| AK004221  | 1110050K14Rik                                        | 7.99E-40 | 10.00274 |
| BE133150  | 1110038B12Rik,0610009C20Rik,0910001G04Rik            | 0.00013  | 1.73497  |
| AK012768  | 1110037F02Rik,mKIAA1429,4930422M05Rik                | 2.76E-06 | 1.51927  |
| BE951265  | 1110036O03Rik,Sc65,AI413214                          | 7.31E-18 | 7.09851  |
| AW544518  | 1110034B05Rik,FLJ37953,MGC117744                     | 8.48E-08 | 1.67433  |
| AV011961  | 1110034A24Rik,AV032410,2810020C19Rik                 | 0.00023  | 2.13757  |
| AI450803  | 1110033F14Rik,AI450803                               | 7.53E-11 | 10.00764 |
| AV217222  | 1110031B06Rik,RP23-378H5.4                           | 8.30E-08 | 1.54821  |

|           |                                                      |          |          |
|-----------|------------------------------------------------------|----------|----------|
| BB765875  | 1110029L17Rik                                        | 1.09E-06 | 1.93848  |
| AK003824  | 1110019K23Rik                                        | 0.00017  | 1.96358  |
| AV008900  | 1110014L15Rik                                        | 0.00026  | 2.09642  |
| BB765852  | 1110013L07Rik                                        | 5.19E-13 | 2.23633  |
| BB795266  | 1110012J17Rik,MGC77963,t8219b25,mKIAA0802,D130071O13 | 0.00059  | 2.08098  |
| BB489180  | 1110012D08Rik                                        | 1.21E-07 | 2.29719  |
| BC020080  | 1110007F12Rik                                        | 5.51E-09 | 1.54958  |
| AK003491  | 1110006E14Rik                                        | 3.75E-34 | 13.11351 |
| AK003403  | 1110004B13Rik,RP23-19I2.5,2810049P21Rik              | 0.00006  | 4.75144  |
| BB752416  | 1110002L01Rik                                        | 0.00002  | 2.01414  |
| BB229269  | 0910001A06Rik,AW122079                               | 8.85E-06 | 2.04286  |
| BC024352  | 0610041E09Rik,AU041184,AW537806,5730424F14Rik        | 7.98E-25 | 1.76338  |
| AV010467  | 0610025L06Rik,AI413966                               | 0.00056  | 2.24561  |
| NM_021554 | 0610012D09Rik,Drev,MNCb-5680                         | 5.60E-06 | 1.55295  |
| BC006049  | 0610011I04Rik,Keg2,AU040201,AU041743                 | 3.73E-30 | 6.61778  |
| BC022145  | 0610008L10Rik,AI043106,BC022145,MGC30290,MGC37887    | 2.52E-06 | 2.26175  |
| AK002308  | 0610007P14Rik,ORF11,C77855,AU019315,1190004E09Rik    | 0.00031  | 1.91075  |

**2394 genes down-regulated in rhabdomyosarcoma (>1.5 fold and P-value < 0.001)**

| Accession # | Sequence Name(s)                                           | P-value  | Fold Change |
|-------------|------------------------------------------------------------|----------|-------------|
| BM228797    | Zranb3,AI316834,C730006D09,4933425L19Rik                   | 1.99E-07 | -4.1058     |
| BM123092    | Zranb1,Gm1956,Trabid,D7Wsu87e,9330160G10Rik                | 7.53E-09 | -1.88422    |
| BG071922    | Znrf2,AU044205,MGC129274,MGC129275,                        | 4.09E-06 | -2.63801    |
| BB026596    | Znrf1,Rnf42,Zrfp1,nin283,MGC101991,B830022L21Rik           | 8.00E-08 | -6.46183    |
| AK003721    | Znhit3,Trip3,Myohd1                                        | 7.00E-10 | -1.92298    |
| BQ174722    | Zhx2,mKIAA0854                                             | 0.00037  | -1.65581    |
| BB532985    | Zfyve9,NSP,SARA,Madhip,SMADIP,E030027L17                   | 0.00002  | -2.28444    |
| BB319935    | Zfpn1a2,Helios,Znfn1a2                                     | 9.90E-16 | -3.1636     |
| NM_023322   | Zfp99,MGC117641,2310046C23Rik,2810437E14Rik                | 0.00003  | -2.01982    |
| AI430439    | Zfp91,Pzf,AL024263,AW545902,9130014I08Rik,A530054C17Rik    | 3.39E-14 | -1.5567     |
| BG069330    | Zfp710,AI324798,9830165K13,5430400N05Rik                   | 0.00003  | -3.38061    |
| AA165749    | Zfp706,C77232,AA793007,AW536850,3110006P09Rik              | 0.00009  | -1.64108    |
| AK016830    | Zfp689,4933416E05Rik                                       | 1.62E-15 | -2.51735    |
| BC003258    | Zfp672,4930488P06Rik,4930511N19Rik,RP23-386K17.2           | 4.03E-13 | -1.83023    |
| BC027760    | Zfp654,1600021C16Rik,1810008K20Rik                         | 1.66E-06 | -2.01902    |
| BC003941    | Zfp639,ZASC1,ANC-2H01,6230400O18Rik                        | 0.00028  | -1.64923    |
| BQ176690    | Zfp612,B230354B21Rik                                       | 1.33E-07 | -7.15708    |
| BB447914    | Zfp503,Nolz1,AI181838,B830002A16Rik                        | 7.14E-15 | -2.11688    |
| NM_020589   | Zfp467,EZ1,AB041616,AI426952,                              | 0.00058  | -1.94396    |
| BI729900    | Zfp445,ZNF168,mszf29,mszf50,AW610627                       | 0.00055  | -1.50412    |
| NM_019565   | Zfp386,Kzf1,KIAA4205,mKIAA4205                             | 1.17E-08 | -1.61635    |
| BE629588    | Zfp367,ZFF29a,ZFF29b,8030486J21Rik                         | 6.54E-06 | -1.79565    |
| BB252481    | Zfp364,AU042696,2610028E05Rik                              | 4.08E-16 | -2.20309    |
| X14678      | Zfp36,Ttp,Gos24,TISII,Nup475,TIS11D,Zfp-36                 | 0.00027  | -2.26931    |
| AF184112    | Zfp354b,Kid2,Tcf1711,MGC130408,MGC130409                   | 9.87E-06 | -2.01127    |
| BE979655    | Zfp3,Fnp-1,Zfp-3,AI854635,B230309J24,RP23-326P7.13         | 0.00009  | -2.70598    |
| BM231649    | Zfp294,C87237,AV266914,KIAA0714,4930528H02Rik              | 1.11E-12 | -1.64604    |
| AV224554    | Zfp27,mkr-4,Zfp-27,mszf76                                  | 9.09E-09 | -2.07706    |
| AK017929    | Zfp198,FIM,MYM,RAMP,SCLL,MGC51607,5830413P05Rik            | 0.00016  | -1.73084    |
| BB579760    | Zfp191,KOX17,ZF-12,Znf191                                  | 2.90E-13 | -1.54874    |
| AV244432    | Zfp142,BB154236,mKIAA0236,9330177B18Rik                    | 0.00015  | -2.52049    |
| BB224658    | Zdhhc2,5730415P04Rik,6430583A19Rik                         | 0.00005  | -2.07445    |
| BG869825    | Zcsl2,DESR1,DELGIP1                                        | 6.16E-39 | -2.90658    |
| AK019473    | Zc3h6,Zc3hdc6,AU024389,                                    | 0.00022  | -2.33911    |
| BE852171    | Zc3h12a,MCPIP,BC036563,MGC41320                            | 4.56E-06 | -3.55012    |
| BB767069    | Zbtb4,mKIAA1538,2310026P19Rik,9230111I22Rik,RP23-422L16.16 | 0.00009  | -1.61074    |
| BM200153    | Zbtb24,Bif1,Bsg1,ZNF450,BC055367                           | 0.00005  | -1.50845    |
| AI327364    | Zap70,Srk,TZK,70kDa,ZAP-70,AI327364                        | 2.58E-07 | -2.74427    |
| BB667090    | Zadh1,AI838763,1810016I24Rik,9630002F03Rik,B830026H24Rik   | 1.51E-08 | -1.53163    |
| NM_022985   | Za20d3,Awp1,3110005P07Rik                                  | 7.53E-08 | -1.53473    |
| AA124553    | Za20d2,Zfp216,AA415485,2310057A04Rik,5830475F03Rik         | 0.00001  | -3.4403     |
| BB800086    | Ywhag,D7Bwg1348e                                           | 0.00075  | -1.61077    |
| BB183208    | Ythdf3,9130022A11Rik                                       | 3.48E-13 | -1.84016    |
| NM_023784   | Yipf7,Yip1b,MGC107572,2310016N21Rik                        | 1.81E-38 | -8.66562    |
| AK008774    | Yars2,AW259696,2210023C10Rik                               | 5.17E-06 | -2.12991    |
| NM_010247   | Xrcc6,Ku70,70kDa,G22p1                                     | 1.06E-14 | -1.60996    |

|           |                                                       |          |           |
|-----------|-------------------------------------------------------|----------|-----------|
| AF166486  | Xrcc5,Ku80,Ku86,AI314015                              | 1.25E-07 | -2.50754  |
| AV337591  | Xpr1,XR,Sxv,Rmc1,Syg1,Rmc-1                           | 1.60E-07 | -1.62494  |
| AV124537  | Xlkd1,Lyve-1,1200012G08Rik                            | 0.00005  | -5.01214  |
| L04961    | Xist,A430022B11                                       | 0.00029  | -92.27805 |
| BG806300  | Xist                                                  | 0.00028  | -29.18203 |
| NM_025275 | X83328,Amz2,ESTM12                                    | 3.86E-35 | -2.67928  |
| BI102531  | Wwp1,AIP5,SDRP1,Tiul1,8030445B08Rik                   | 0.00041  | -4.86794  |
| NM_009523 | Wnt4,Wnt-4,MGC123964                                  | 0.00011  | -3.59808  |
| AK007980  | Wnk2,AW122246,mKIAA1760,1810073P09Rik                 | 0        | -6.84407  |
| AV298358  | Wdt2,dsu,Gm974,MGC92980                               | 4.45E-40 | -20.67925 |
| BB795506  | Wdr7,TRAG,AI462727,mKIAA0541                          | 5.98E-14 | -1.94944  |
| BB123403  | Wdr42a,H326,C76055,D1Ucla4                            | 8.17E-15 | -1.8615   |
| AV222037  | Wdr37,AI481191,mKIAA0982,                             | 0.00004  | -2.12966  |
| AK009297  | Wdr33,WDC146,1110001N06Rik,                           | 5.35E-13 | -1.74297  |
| NM_133734 | Wdr23,GLO14,C76035,D14Ucla1,0710008A13Rik             | 0.00003  | -2.25326  |
| BM234499  | Wdr22,BCRG2,BCRP2,AI325023                            | 0.00065  | -2.26363  |
| NM_025362 | Wbscr18,1300007M11Rik                                 | 4.61E-18 | -1.92368  |
| NM_016852 | Wbp2                                                  | 3.60E-13 | -2.2722   |
| NM_011707 | Vtn,Vn,AI256434                                       | 7.65E-30 | -15.82587 |
| AK008752  | Vps37a,AW261445,D8Erd531e,2210018P21Rik,4930592A21Rik | 0.00002  | -2.14928  |
| AK013045  | Vps36,Eap45,1700010A24Rik,2210415M20Rik,2810408E15Rik | 1.90E-10 | -2.18495  |
| AI790396  | Vps13d,BC037490,KIAA0453                              | 2.08E-20 | -2.27619  |
| BB127955  | Vldlr,AA408956,AI451093,AW047288                      | 0        | -10.10324 |
| AV308858  | Vezf1,db1,AI848691,AW046909                           | 7.74E-08 | -1.91751  |
| U48800    | Vegfb,Vrf,VEGF-B                                      | 2.94E-07 | -7.97537  |
| AI606078  | Vegfa,VPF,Vegf,VEGF-A,VEGF120                         | 0.00043  | -2.11381  |
| NM_011696 | Vdac3,MGC102096                                       | 0        | -2.18676  |
| AV020390  | Vdac1,Vdac5,AL033343                                  | 0        | -2.33531  |
| BF303544  | Vapb,R75548,VAP33b,D2Abb2e,                           | 3.16E-07 | -1.75297  |
| AK009266  | Vamp5                                                 | 2.49E-14 | -3.82423  |
| BB531498  | Vamp3,ceb,D130027G05Rik                               | 1.84E-08 | -1.6139   |
| NM_013840 | Uxt,0910002B17Rik                                     | 3.98E-10 | -2.08689  |
| AW554408  | Usp9x,Faf1,Dffrx,FAF-X,AA407302                       | 3.01E-12 | -1.89922  |
| BM249286  | Usp45,Gcap7,AI843191,3110003C05Rik,4930550B20Rik      | 1.58E-10 | -1.70701  |
| BG071170  | Usp32,Car4,AW045245,2900074J03Rik,6430526O11Rik       | 0.00018  | -2.25784  |
| NM_013918 | Usp25                                                 | 1.13E-06 | -2.3946   |
| AI196993  | Usp24,C79851,AI414051                                 | 3.85E-27 | -1.8394   |
| AI553394  | Usp2,Ubp41,Usp2-45,Usp2-69,B930035K21Rik              | 2.44E-42 | -13.70393 |
| BB252881  | Usp19,Zmynd9,AI047774,8430421I07Rik                   | 3.50E-10 | -2.09614  |
| AK014891  | Usp15,Gcap18,AI327321,                                | 0        | -2.41168  |
| AV347341  | Usp13,ISOT3,IsoT-3,AI848077,MGC107670,2700071E21Rik   | 5.12E-15 | -4.2677   |
| NM_009462 | Usp10,UBPO,Uchrp,mKIAA0190,2610014N07Rik              | 4.86E-15 | -1.72564  |
| BC024355  | Usmg5,2010301L15Rik                                   | 9.94E-14 | -1.88626  |
| NM_031401 | Usmg4,D3Bwg1078e                                      | 1.62E-10 | -2.78582  |
| AW545289  | Uros,Uros3,AI415298                                   | 0.00035  | -2.01493  |
| AV292769  | Urod,AI323803                                         | 0        | -2.10176  |
| AK003160  | Uqcrq,Qpc,QP-C,Uqcrb,9.5kDa,                          | 4.86E-16 | -2.24459  |
| AK019085  | Uqcrh,2210416J04Rik,2310021J10Rik,2610041P16Rik       | 1.18E-11 | -1.83348  |
| AK003966  | Uqcfs1,AI875505,4430402G14Rik                         | 2.20E-11 | -2.6231   |
| BG075002  | Uqcrc2,1500004O06Rik,4930408O21Rik                    | 5.27E-25 | -2.08085  |
| AK004031  | Uqcrc1,MGC97899,1110032G10Rik                         | 1.88E-19 | -3.69483  |
| NM_026219 | Uqcrb,QPC,QP-C,UQBC                                   | 2.16E-23 | -2.1038   |
| NM_025650 | Uqcr,AL022707,0710008D09Rik                           | 1.97E-08 | -2.42693  |
| BC004037  | Ung,UNG1,UNG2                                         | 0.00004  | -3.47937  |
| BB355934  | Unc84b,SUN2,AI551766,C030011B15,B230369L08Rik         | 9.55E-10 | -2.01118  |
| NM_013881 | Ulk2,Unc51.2,AU015340,mKIAA0623,A830085I22Rik         | 2.87E-06 | -2.29183  |
| NM_011674 | Ugt8a,Cgt,Ugt8,mCerGT,AI850488,AW455908               | 1.35E-11 | -1.50634  |
| AW146314  | Ugp2,MGC38262                                         | 3.70E-14 | -2.10131  |
| AF053352  | Ucp3,UCP-3,Slc25a9,AI645527                           | 0.00088  | -14.014   |
| BC012701  | Ucp1,Ucp,Slc25a7,AI385626                             | 5.61E-11 | -60.09784 |
| AV313813  | Uchl5,Uch37,5830413B11Rik                             | 6.41E-21 | -1.83478  |
| AB033370  | Uchl3                                                 | 1.57E-11 | -1.64049  |
| AV174556  | Ubx4,MGC7992,6330407P03Rik                            | 0        | -3.65022  |
| NM_024432 | Ubx4,Ubx4c2,AU040909,1200008L11Rik,2210415J11Rik      | 7.16E-07 | -1.67852  |
| BB764994  | Ubqln4,A1u,UBIN,AI663987                              | 0.00002  | -1.65929  |
| BC016456  | Ubl7,2300004C15Rik                                    | 0.00048  | -1.95766  |

|           |                                                          |          |           |
|-----------|----------------------------------------------------------|----------|-----------|
| BI650739  | Ubl4,Gdx,DXS254E,DXS254Eh,DXHXS254E                      | 7.08E-12 | -1.68145  |
| AV328436  | Ubl3,HCG,AW108023                                        | 0.0008   | -1.64484  |
| BB703414  | Ubie,Gm921,Ubie2                                         | 0.00003  | -3.66552  |
| AU067784  | Ube3b,AI449831,AU020130                                  | 2.41E-08 | -2.13462  |
| AV010904  | Ube2v2,MMS2,C81524,                                      | 8.07E-19 | -2.60358  |
| AU040151  | Ube2v1,CROC1,AI256840,D7Bwg1382e,0610011J09Rik           | 9.83E-13 | -1.64943  |
| NM_026024 | Ube2t,C80607,2700084L22Rik                               | 9.88E-06 | -3.65988  |
| AV054417  | Ube2r2,Ubc3b,Cdc34b,1200003M11Rik                        | 0        | -2.65136  |
| BE980685  | Ube2n,AL022654,BB101821,1500026J17Rik                    | 0.00054  | -2.12941  |
| BC026581  | Ube2m,UBC12,Ubc-rs2,MGC25453,MGC37197                    | 0.00007  | -2.01671  |
| BG066549  | Ube2l3,UbcM4,Ubce7,C79827,MGC118100                      | 1.60E-08 | -2.43824  |
| NM_025985 | Ube2g1,AI256795,                                         | 7.76E-28 | -2.22103  |
| NM_009455 | Ube2e1,UbcM3,Ubce5,ubcM2                                 | 2.62E-07 | -1.53746  |
| AK009276  | Ube2d3,AA414951,1100001F19Rik,9430029A22Rik              | 1.19E-14 | -1.57659  |
| BC019464  | Ube2d1,UBCH5,MGC28550                                    | 0        | -5.65532  |
| AK010432  | Ube2b,HR6B,Rad6b,E2-14k,2610301N02Rik                    | 1.24E-22 | -2.15598  |
| BG868960  | Ube2a,HR6A,HHR6A,Mhr6a                                   | 5.62E-28 | -1.6334   |
| BC007179  | Ubap2,AA408600,AU045235,mKIAA1491,1190005K07Rik          | 3.96E-08 | -1.61496  |
| NM_133835 | Ubadc1,GBDR1,Gdbr1,AA407978,1110033G07Rik                | 7.97E-36 | -2.76057  |
| BI100077  | Txndc4,Erp44,AI849526,AL033348,1110001E24Rik             | 0.00009  | -1.5031   |
| BF162157  | Txndc10,AV259382,mKIAA1830,6430411B10Rik,A730024F05Rik   | 0.00014  | -1.53227  |
| AF422244  | Txlnb,Mdp77,2310001N14Rik                                | 1.43E-19 | -6.26563  |
| AF422244  | Txlnb,Mdp77,2310001N14Rik                                | 0        | -6.55018  |
| BG067445  | Txlna,Txln,AI425952,AW209241,                            | 4.68E-08 | -1.60473  |
| NM_018879 | Tusc4,G21,NPR2L,NPRL2,2810446G01Rik                      | 0.00001  | -1.60196  |
| NM_019742 | Tusc2,PAP,Fus1,Lgcc,Pdap2,AA407686,1190001E22Rik         | 0.00002  | -1.74551  |
| AV097965  | Tufm,EFTU,C76308,C76389,EF-TuMT,2300002G02Rik            | 3.76E-06 | -2.13021  |
| NM_017379 | Tuba8                                                    | 8.04E-25 | -100      |
| AW491660  | Tuba4,M[a]4                                              | 5.08E-10 | -2.87887  |
| BC025840  | Ttn,mdm,shru,                                            | 6.21E-08 | -1.70347  |
| BB329157  | Ttc7b,Ttc7l1,AA408451                                    | 4.15E-17 | -4.63552  |
| BC025435  | Ttc4,L62,AF007005,2810002P21Rik                          | 9.13E-09 | -1.71816  |
| BB078627  | Ttc19,AI505442,2010204O13Rik,2810460C24Rik,RP23-330N10.4 | 3.42E-06 | -3.09638  |
| BC005644  | Tst,Rhodanese                                            | 1.41E-31 | -6.49786  |
| C76990    | Tspan8,C76990,Tm4sf3,MGC38363,E330007O21Rik              | 0.00024  | -6.51611  |
| AF201288  | Tsc22d3,DIP,Gilz,Dsip1,TSC-22R                           | 1.43E-06 | -2.0832   |
| NM_019510 | Trpc3,Trp3,Trpp3,MGC124333                               | 6.74E-07 | -9.34878  |
| AK003956  | Trp53inp2,1110029F20Rik                                  | 2.92E-22 | -3.19453  |
| NM_134125 | Trip10,Cip4,AI646975                                     | 0.00087  | -3.20372  |
| BB825733  | Trim7,AI790312                                           | 3.62E-12 | -8.32737  |
| NM_021447 | Trim54,MURF,Rnf30,                                       | 0.00004  | -2.66112  |
| BB611004  | Trim24,TIF1,Tif1a,AI447469,A130082H20Rik,D430004I05Rik   | 2.33E-06 | -1.80713  |
| AV276781  | Trim23,Arfd1,AI450195,6330516O20Rik                      | 3.63E-08 | -2.40182  |
| BB033733  | Trim16,EBBP,AI482483,9130006M08Rik                       | 1.38E-09 | -2.94808  |
| AF223415  | Trdn,TDN,triadin-1,triadin-2,triadin-3,2310045H21Rik     | 9.87E-12 | -3.58956  |
| AK007951  | Trappc2,Sedl,TRS20,MIP-2A,AW496358,                      | 7.97E-14 | -1.95801  |
| BB297636  | Trap1,HSP75,2410002K23Rik                                | 0.00099  | -1.75197  |
| AK011869  | Tprt,TPT,mDLP1,2610203G20Rik,2700031G06Rik               | 2.71E-06 | -2.74841  |
| AI266910  | Tpp1,Cln2,TPP-1                                          | 0.00083  | -1.59494  |
| NM_022314 | Tpm3,Tpm5,Tm5NM,Tpm-5,hTMnm,                             | 0.00002  | -1.93559  |
| AK003186  | Tpm2,Tpm-2,Trop-2                                        | 2.65E-27 | -2.49321  |
| AV209969  | Tpm1,Tmpa,Tpm-1,AA986836,alpha-TM                        | 1.93E-27 | -8.58132  |
| AW537828  | Tpi1,Tpi,Tpi-1,AI255506                                  | 0        | -3.79948  |
| NM_009413 | Tpd52l1,D53                                              | 7.68E-07 | -2.75582  |
| BG072270  | Tom1l2,Srebf1,AU042072,2900016I08Rik                     | 8.62E-07 | -1.73655  |
| AV174616  | Tob2,AV071822,mKIAA1663,2900090N22Rik,4930545K18Rik      | 1.65E-06 | -2.39386  |
| BQ266486  | Tob1,Tob,Trob                                            | 3.79E-30 | -3.31944  |
| NM_031176 | Tnxb,Tnx,tenascin-X                                      | 2.82E-10 | -9.22699  |
| BB788270  | Tnrc6b,MGC28739,A730065C02Rik,D230019K20Rik              | 5.19E-11 | -1.52552  |
| NM_011620 | Tnnt3,fTnT                                               | 3.71E-12 | -3.06336  |
| NM_009405 | Tnni2                                                    | 3.41E-11 | -3.13825  |
| AI662480  | Tnks2,AA517131,AI662480,5430432P15Rik                    | 1.11E-14 | -2.29186  |
| BB156756  | Tnik,AI451411,1500031A17Rik,4831440I19Rik,C530008O15Rik  | 0.00034  | -2.7332   |
| AK004939  | Tmprss6,1300008A22Rik                                    | 0.00023  | -2.79917  |
| NM_016712 | Tmod4,MTMOD,Sk-Tmod                                      | 1.13E-34 | -10.09039 |
| NM_021883 | Tmod1,Tmod,E-Tmod,MGC124125,MGC124126                    | 6.79E-07 | -2.16759  |

|           |                                                      |          |           |
|-----------|------------------------------------------------------|----------|-----------|
| BC027354  | Tmem87a,A930025J12Rik                                | 0.00007  | -1.61117  |
| BC024458  | Tmem77,Al647667,2010305N14Rik,2610318G18Rik          | 5.61E-45 | -1.76264  |
| BC011320  | Tmem70,1110020A09Rik,2210416J16Rik                   | 0        | -2.88053  |
| BC027828  | Tmem60,BC027828,MGC38035                             | 6.93E-35 | -1.92817  |
| BB768133  | Tmem56,AU018104,AW109744,4930577M16Rik,C730036B01Rik | 0.00004  | -3.61269  |
| AK009779  | Tmem52,2310043I08Rik                                 | 0.00002  | -36.27717 |
| BC020100  | Tmem5,MGC28135,MGC103359,6330415D21Rik               | 7.87E-14 | -1.69354  |
| BC026654  | Tmem45b,BC018222,MGC25912,MGC37581                   | 0.00044  | -21.31984 |
| BB311030  | Tmem41b,AU018901,MGC38847,                           | 0.0001   | -1.79395  |
| AW540790  | Tmem38b,AA437809,D4Ert89e,1600017F22Rik              | 0.00001  | -1.64569  |
| BC014728  | Tmem38a,Al413399,1110001E17Rik                       | 1.54E-20 | -4.44444  |
| BB262218  | Tmem32,BC032271,MGC40705,9630048L06Rik               | 2.07E-16 | -1.74584  |
| AK002841  | Tmem25,Al429491,0610039J01Rik                        | 0.00034  | -3.49159  |
| BM238389  | Tmem23,MOB,SMS1,Sor1,C80702,                         | 1.18E-06 | -2.46719  |
| BC026973  | Tmem15,BC026973,MGC36683,mKIAA1094                   | 2.34E-07 | -2.2997   |
| BG075225  | Tmem11,AA409091,5730466P16Rik                        | 0.00002  | -2.11983  |
| AV246773  | Tmeff2,4832418D20Rik                                 | 2.93E-07 | -2.615    |
| BC020076  | Tmed5,3110020O18Rik,4432412D15Rik                    | 2.24E-28 | -2.04649  |
| BB463345  | Tmed4,Al326346,1110014L17Rik,RP23-198N14.6           | 1.29E-08 | -1.59257  |
| BB711990  | Tmcc3,Tmcc1,C88213,AW488095,MGC30586,C630016B22Rik   | 0.00002  | -2.14768  |
| AK004359  | Tmcc2,KIAA0481,1110063G11Rik                         | 0.00039  | -1.77167  |
| AA244468  | Tmcc1,mKIAA0779,3632431M01Rik                        | 5.50E-11 | -4.07536  |
| BB428982  | Tmc7,C230064B05,C630024K23Rik                        | 3.83E-18 | -6.41537  |
| BQ176328  | Tm2d3,Blp2,1110025I09Rik,5930422O05Rik               | 0        | -10.95317 |
| AF353993  | Tm2d1,Bbp,AA990549,2310026L18Rik                     | 0.00025  | -1.91393  |
| AU045006  | Tle4,Bce1,Grg4,Bce-1,                                | 7.31E-07 | -2.284    |
| AV103412  | Tkt,p68                                              | 7.61E-08 | -1.88586  |
| BB365296  | Tirap,Mal,wyatt,Tlr4ap,AA407980,C130027E04Rik        | 3.84E-07 | -2.00201  |
| BB707122  | Tiparp,DDF1,PARP7,PARP-7,AW558171                    | 0.00002  | -2.29315  |
| BB381550  | Timp4,TIMP-4                                         | 1.24E-06 | -7.99561  |
| BM878039  | Timp2,Timp-2,D11Bwg1104e                             | 0.00023  | -2.83729  |
| BC028435  | Timm9,Tim10a,Timm10,2810011L15Rik                    | 0.0005   | -3.93992  |
| AK004190  | Timm8b,Tim8b                                         | 0        | -2.62029  |
| AV102008  | Timm44,Tim44,Mimt44,D8Ert118e,0710005E20Rik          | 6.84E-29 | -2.45511  |
| NM_016897 | Timm23,Tim23,MGC46821                                | 0        | -1.96506  |
| AF106620  | Timm17a,17kDa,mTim17a                                | 4.55E-20 | -1.67778  |
| BB373351  | Tigd2,3632410O17Rik                                  | 3.57E-06 | -1.5301   |
| BB350618  | Thtpa,AW122966,MGC38198                              | 1.20E-16 | -2.05817  |
| NM_009381 | Thrsp                                                | 2.75E-06 | -8.95851  |
| BC009165  | Thrsp                                                | 1.15E-29 | -15.05626 |
| BB523900  | Thrb,Nr1a2,Thrb1,Thrb2,T3R[b],T3Rbeta,c-erbAbeta     | 0.00002  | -2.09493  |
| BI525006  | Thra,Rvr,Erba,Nr1a1,                                 | 1.79E-08 | -2.47936  |
| BG066490  | Thoc1,NMP-84,AW107452,MGC28284,3110002N20Rik         | 5.60E-09 | -1.85862  |
| NM_025790 | Them2,RP23-92G13.5,0610006O17Rik                     | 0        | -5.80195  |
| BB130418  | Thap4,2010320B01Rik                                  | 1.92E-06 | -3.02711  |
| BG794571  | Tgfr3,TBRIII,AU015626,AW215636,1110036H20Rik         | 0.00084  | -2.6457   |
| AK011596  | Tfr3,TFR,p90,CD71,TFR1,                              | 2.33E-06 | -2.88011  |
| BM246377  | Tfdp2,DP3,DP-3,A330080J22Rik                         | 3.62E-07 | -1.7132   |
| Al429207  | Tfb1m,Al429207,MGC41387                              | 0.00002  | -1.6061   |
| NM_009360 | Tfam,Hmgt5,mtTFA,tsHMG,Al661103                      | 1.24E-21 | -1.72253  |
| BG976649  | Tex2,TEG-27,AW539211,MGC103362,MGC118625             | 1.27E-09 | -2.03434  |
| Al553404  | Tex2,Taz4,Def-5,Al553404,4930568E07Rik               | 5.31E-10 | -1.97579  |
| BM124391  | Terf1,Pin2,Trf1,Trbf1                                | 0.00084  | -2.07146  |
| BC017689  | Tef,2310028D20Rik                                    | 3.37E-22 | -3.01215  |
| BG070567  | Tdrd3,6720468N18,4732418C03Rik                       | 0.00006  | -1.78422  |
| BM245221  | Tcp11I2,MGC39016,E430026E19Rik                       | 9.27E-19 | -1.65137  |
| NM_013687 | Tcp11,Tcp-11,D17Ken1,MGC107229                       | 2.56E-06 | -2.49723  |
| NM_009341 | Tcp10c,T66C-a,Tcp-10c,D17Leh66C,D17Leh66ca           | 7.14E-06 | -5.52112  |
| AV143687  | Tcn2,Tcn-2,AW208754                                  | 0.00004  | -2.16582  |
| NM_011549 | Tcf3b,TFEB                                           | 0.00071  | -5.35455  |
| NM_009328 | Tcf15,Meso1,paraxis,bHLH-EC2                         | 3.49E-28 | -9.25779  |
| AV264059  | Tceb3,110kDa,Tceb3a,AA408125                         | 6.21E-07 | -1.83579  |
| Al891570  | Tceb1,AA407206,                                      | 2.08E-16 | -2.39219  |
| BC010807  | Tcea3,S-II                                           | 0        | -44.44577 |
| NM_009323 | Tbx15,de,Tbx8,Tbx14                                  | 6.41E-39 | -4.21478  |
| BB139935  | Tbrg4,Cpr2,TB-12,                                    | 5.81E-10 | -2.16647  |

|           |                                                          |          |           |
|-----------|----------------------------------------------------------|----------|-----------|
| BB043465  | Tbpl1,STD,TLF,TRP,                                       | 0.00009  | -2.21808  |
| AF023098  | Tbc1d4,As160,AV295684,KIAA0603,A930035N22,5930406J04Rik  | 1.70E-08 | -2.61508  |
| BC020138  | Tbc1d19,2810453K03Rik                                    | 2.37E-10 | -1.56274  |
| AV060417  | Tbc1d10c,AI428527,1810062O14Rik                          | 0.00008  | -3.92921  |
| NM_133682 | Taz,G4.5,XAP-2                                           | 1.14E-07 | -1.7753   |
| AK005193  | Tatdn3,1500010M24Rik                                     | 3.10E-08 | -2.12636  |
| BG083270  | Tatdn1,CDA11,2310079P03Rik                               | 1.26E-10 | -1.66483  |
| AK011540  | Tarsl1,AI429208,2610024N01Rik                            | 2.86E-06 | -1.8747   |
| AW538183  | Tardbp,C85084,1190002A23Rik                              | 5.44E-14 | -1.63353  |
| BC019453  | Taf9,Taf2g,AA673500,                                     | 5.14E-25 | -3.64635  |
| BC004057  | Tacc2,KIAA4180,mKIAA4180                                 | 5.80E-12 | -3.24334  |
| NM_018802 | Syt8,MGC124104,MGC124105                                 | 3.50E-13 | -5.74809  |
| NM_008596 | Sypl2,Mg29,AI552439                                      | 4.47E-23 | -16.01813 |
| AI848603  | Synpo2,Myo,AI848603,myopodin,1110069I04Rik,9530006G20Rik | 3.09E-25 | -5.08481  |
| AI849322  | Synpo,AW046661,9330140I15Rik                             | 1.58E-10 | -10.28316 |
| BG065785  | Synj2,SJ2,AI481647,mKIAA0348                             | 1.79E-08 | -2.02334  |
| BC004829  | Syngr2,Clast2,cellugyrin                                 | 2.61E-18 | -3.08328  |
| NM_009303 | Syngr1,p29,R75468,Syngr1b                                | 0.00006  | -3.99802  |
| BF582734  | Syne2,NUA,AW546258,MGC96690                              | 3.85E-20 | -3.75105  |
| BM899344  | Sycp3,Cor1,Scp3                                          | 3.16E-42 | -2.78524  |
| BM203457  | Svil,AU024053,B430302E16Rik                              | 1.10E-14 | -2.05655  |
| AI452098  | Supv3l1,6330443E10Rik                                    | 6.89E-06 | -1.60583  |
| BB822310  | Supt7l,2610524B01Rik,6030455L14Rik                       | 1.87E-06 | -1.81066  |
| NM_020564 | Sult5a1,Sultx1,Sult-x1                                   | 0.00085  | -2.6335   |
| AK002700  | Sult1a1,PST,Stp,Stp1,AI266890                            | 3.28E-10 | -6.05182  |
| BB401995  | Suhw2,D10Jhu82e                                          | 0.00099  | -1.83812  |
| BE853371  | Sugt1,SGT1,2410174K12Rik                                 | 4.29E-21 | -3.01972  |
| BF608645  | Suclg2,AF171077,AW556404,MGC91183,D6Wsu120e              | 3.22E-15 | -2.90631  |
| NM_019879 | Suclg1,Sucla1,1500000I01Rik                              | 0        | -3.58165  |
| AK005273  | Sucla2,4930547K18Rik                                     | 1.25E-28 | -2.2445   |
| NM_019637 | Styx,hStyxb,MGC106795,0610039A20Rik                      | 0        | -2.24862  |
| BG245414  | Stxbp4,Synip,6030470M02Rik                               | 5.75E-06 | -5.49521  |
| NM_011504 | Stxbp3a,Stxbp3,Sxtbp3,MGC86097,Munc-18c                  | 1.86E-06 | -1.51647  |
| NM_018768 | Stx8,CARB,0610007H08Rik,1110002H11Rik,4930571E13Rik      | 0.00091  | -1.6555   |
| AK018158  | Stx17,AW048351,4833418L03Rik,6330411F21Rik,9030425C21Rik | 6.46E-07 | -1.79942  |
| AK006314  | Strbp,Spnr,C86322                                        | 0.00018  | -2.37994  |
| NM_023231 | Stoml2,MSLP2,0610038F01Rik                               | 3.99E-07 | -1.73312  |
| BB748611  | Stk38,Ndr1,AA617404,5830476G13Rik,9530097A09Rik          | 0.00054  | -2.33454  |
| AV375248  | Stk35,CLIK1,1700054C12Rik                                | 0.00021  | -2.23395  |
| NM_054098 | Steap4,Tiarp,Tnfaip9,AI481214,dudulin 4,1110021O17Rik    | 4.67E-06 | -2.68728  |
| BB774473  | Stc2,Stc2l,mustc2                                        | 0.00001  | -3.42358  |
| BC024319  | Stat5b                                                   | 0        | -7.14946  |
| BM119481  | Stard8,KIAA0189,mKIAA0189                                | 2.55E-10 | -2.99334  |
| AI852671  | Stard7,AI852671,AL022671,AW544915,MGC27663               | 1.78E-18 | -1.90105  |
| BI076697  | Stard5,AI607880,D7Erd152e,2310058G22Rik                  | 0.00002  | -2.59619  |
| NM_019990 | Stard10,PCTP2,Pctpl,CGI-52,PC-TP2,TISP-81,               | 0.00008  | -2.76617  |
| BB135364  | Stac3,9830125E18                                         | 0.00019  | -3.87515  |
| NM_013666 | St8sia5,Siat8e,ST8SiaV,MGC41119                          | 8.89E-14 | -11.1285  |
| BB122084  | St7l,St7r,MGC130399                                      | 5.13E-06 | -1.51215  |
| BB532866  | St3gal6,Siat10,AI930218,AW552396,St3galVl,1700023B24Rik  | 6.93E-10 | -3.47095  |
| BB829192  | St3gal5,3S-T,[a]2,Siat9                                  | 0.00001  | -2.42238  |
| BG064390  | Ssh1,SSH-1,Gm1394,Gm1395,mSSH-1L,AW551225                | 0.00024  | -3.93288  |
| BC021839  | Srpr,1300011P19Rik                                       | 1.18E-27 | -3.02803  |
| BG795043  | Srl,sar,AW108387,9830004M20Rik                           | 0        | -2.12899  |
| AI326423  | Srebf1,ADD-1,SREBP1,SREBP-1,                             | 0.00001  | -2.43966  |
| AF174535  | Sqrdl,0610039J17Rik,4930557M22Rik                        | 1.38E-30 | -2.92012  |
| BB815380  | Spop,TEF2,Pcif1,AI315626                                 | 3.40E-07 | -1.75102  |
| BB428424  | Spock3,AI428471,KIAA4039,mKIAA4039,2900045C01Rik         | 0.00048  | -5.93239  |
| AK005880  | Spata3,Tsarg1,Mtsarg1,                                   | 0.0004   | -2.62348  |
| BM204396  | Spata2,AI504642,MGC38980,mKIAA0757                       | 1.77E-06 | -1.89296  |
| BI903628  | Spata11,2310045B01Rik,2510008E23Rik                      | 0.00006  | -3.6094   |
| AK007793  | Spast,Spg4,mKIAA1083                                     | 7.40E-07 | -1.68045  |
| BB239907  | Spag7,ACRP,FSA-1,Fsa1l,MGC67704,5730443G10               | 6.48E-36 | -2.0581   |
| BG061840  | Spag16,Pf20,Wdr29                                        | 1.67E-07 | -2.6297   |
| NM_011446 | Sox7                                                     | 7.77E-09 | -2.55956  |
| D61689    | Sox6,AI987981                                            | 4.16E-14 | -4.11415  |



|           |                                                        |          |           |
|-----------|--------------------------------------------------------|----------|-----------|
| AK004781  | Sox17,Sox                                              | 1.37E-08 | -2.4138   |
| Z11664    | Sos2                                                   | 1.40E-15 | -1.94561  |
| AV247637  | Sort1,Ntr3,Ntr3,Al852375,2900053A11Rik                 | 4.31E-29 | -3.61902  |
| BI143942  | Sord,Sdh1,Sdh-1,Sodh-1,MGC31355                        | 8.88E-25 | -5.92376  |
| NM_013671 | Sod2,MnSOD,Sod-2,MGC6144                               | 8.45E-43 | -2.36253  |
| BG067098  | Socs7,Nap4,C85125,2310063P06Rik                        | 8.80E-08 | -1.70471  |
| AV270982  | Snx19,Al195321,Al848208,mKIAA0254,3526401K03Rik        | 0.00001  | -1.67483  |
| BC019424  | Snx16,Al117577,Al747675,4930522N22Rik                  | 8.98E-14 | -1.53537  |
| AV377013  | Snx13,mKIAA0713                                        | 5.49E-35 | -2.03253  |
| BB308395  | Sntg1,SYN4,G1SYN,4933426D16Rik                         | 0.00081  | -2.92213  |
| NM_009228 | Snta1,Snt1,AW228934                                    | 0.00046  | -4.96063  |
| NM_013670 | Snrpn,SMN,Peg4,HCERN3,MGC18604,MGC30325,2410045I01Rik  | 5.75E-16 | -4.27191  |
| AW046420  | Snrpd3,SMD3,AW046420,1700043E15Rik,2310009E13Rik       | 0        | -3.93956  |
| BC020189  | Snrk,R74830,Al448042,                                  | 2.79E-06 | -2.05491  |
| BB154631  | Snf1lk2,Sik2,G630080D20Rik                             | 3.01E-10 | -2.45436  |
| NM_011430 | Sncg,C79089,persyn                                     | 0.00041  | -4.05488  |
| AI324124  | Snca,NACP,alphaSYN                                     | 0.00006  | -2.35209  |
| BB461550  | Snapp2,AU015675,0610007H10Rik                          | 0.00002  | -2.6241   |
| BC023119  | Smyd2,Zmynd14,4930402C15,1110020E07Rik                 | 9.59E-06 | -2.07286  |
| AW744143  | Sms,Gy,gyro,Al427066                                   | 1.21E-40 | -3.22066  |
| U82380    | Smr2,MSG2                                              | 0        | -16.00721 |
| NM_011422 | Smr1,MSG1,AA589601                                     | 9.32E-06 | -4.56679  |
| NM_020561 | Smpd3a,ASM3A,ASML3,ASML3A,Al529588,0610010C24Rik       | 6.49E-19 | -2.11518  |
| NM_021491 | Smpd3,fro,nSMase2,Al427456,AW537966,4631433G07Rik      | 1.24E-09 | -4.94157  |
| NM_022315 | Smoc2,Smoc2l,1700056C05Rik,5430426J21Rik               | 3.50E-23 | -5.34166  |
| AV281575  | Smc6l1,SMC6                                            | 0.00068  | -1.88397  |
| BI646741  | Smad3,Madh3,AU022421                                   | 1.21E-07 | -1.79273  |
| BM200011  | Sltm,Met,5730455C01Rik,5730555F13Rik,9130215G10Rik     | 7.18E-10 | -2.87266  |
| BG066440  | Slco6c1,C79179,4933404A18Rik                           | 0.00073  | -3.10036  |
| BE686667  | Slco5a1,AA407151,4732454B15,A630033C23Rik              | 0.00005  | -2.19445  |
| BM237089  | Slco3a1,Anr1,MJAM,OATP-D,R75096,Slc21a11,5830414C08Rik | 0.00008  | -3.07974  |
| AV237157  | Slco2b1,OATP-B,Slc21a9,Al060904,Al852653,MGC106224     | 0.00076  | -4.39136  |
| BB611738  | Slc9a6,mKIAA0267,3732426M05,6430520C02Rik              | 1.23E-12 | -2.25754  |
| AV373598  | Slc9a3,NHE3,Al930210,9030624O13Rik                     | 0.00088  | -1.74283  |
| AV274006  | Slc9a2,NHE2,AV333884,                                  | 6.28E-20 | -4.54624  |
| AV361504  | Slc8a3,Ncx3,AW742262,MGC90626                          | 2.88E-10 | -5.25206  |
| NM_017394 | Slc7a10,Asc-1,AL024237,D7Bwg0847e                      | 0.0004   | -4.921    |
| BG069516  | Slc6a8,CRT,CT1,CRTR,Creat,AA589632                     | 1.80E-33 | -1.99693  |
| BE655147  | Slc4a4,NBC,Al835705                                    | 0.00097  | -3.19427  |
| NM_011403 | Slc4a1,Ae1,CD233,Empb3,l11Jus51                        | 0.00002  | -4.79932  |
| BC024519  | Slc45a3,PRST,IPCA-6                                    | 7.17E-08 | -2.713    |
| BB378464  | Slc43a1,PB39,Pov1,R00504,AA986141,2610016F07Rik        | 3.33E-12 | -4.29882  |
| BC011108  | Slc41a3,Al480742,SLC41A1-L2,1010001P06Rik              | 6.41E-15 | -10.61364 |
| BF134253  | Slc41a1,Al573938,B230315F01Rik                         | 7.09E-24 | -2.67228  |
| NM_027052 | Slc38a4,Ata3,mATA3,1110012E16Rik,1700012A18Rik         | 4.14E-14 | -10.27803 |
| NM_023805 | Slc38a3,Nat1,D9Ucla2,Slc38-3,0610012J02Rik             | 0.00015  | -8.46303  |
| NM_008063 | Slc37a4,G6PT,G6pt1,mG6PT,GSD-1b                        | 0        | -22.48098 |
| AI596194  | Slc36a2,PAT2,Tramd1,A530067G19Rik                      | 0.00017  | -10.35131 |
| BB117951  | Slc30a9,HUEL,GAC63,AL024256,2310024J23Rik              | 1.37E-07 | -1.50604  |
| AB008453  | Slc2a4,Glut4,Glut-4                                    | 8.82E-07 | -14.20015 |
| NM_021520 | Slc28a2,Cnt2,BB152493,B430217P18,2010208B10Rik         | 2.11E-21 | -12.23774 |
| AI156620  | Slc27a1,Fatp,FATP1                                     | 1.13E-13 | -2.96537  |
| BC026925  | Slc25a4,Ant1,AU019225                                  | 1.90E-11 | -2.00685  |
| BC019996  | Slc25a35,1810012H11Rik,RP23-396M19.7                   | 0.00025  | -2.63441  |
| NM_133668 | Slc25a3,PTP,Phc,5730556H19Rik                          | 9.47E-27 | -1.74433  |
| BB832209  | Slc25a29,CACL,mCACL,C030003J19Rik                      | 0.00005  | -3.85641  |
| BC019170  | Slc25a26,Slc25a6,AW557176,                             | 3.55E-08 | -6.65933  |
| BB186319  | Slc25a25,MCSC,MGC36388,mKIAA1896,1110030N17Rik         | 9.65E-06 | -7.85778  |
| AV008091  | Slc25a20,Cact,mCAC,C78826,1110007P09Rik                | 0        | -2.43443  |
| BC018167  | Slc25a19,DNC,MUP1,2900089E13Rik                        | 2.19E-09 | -4.31453  |
| AW541300  | Slc25a15,Ornt1,D630044L02Rik                           | 0.00002  | -1.90723  |
| AK019150  | Slc25a12,Al839531,2610002D09Rik                        | 1.40E-44 | -4.7718   |
| AI647500  | Slc25a11,2oxoc,2310022P18Rik                           | 2.43E-07 | -3.36083  |
| NM_009201 | Slc1a5,R16,AAAT,ATBO                                   | 6.59E-11 | -4.93011  |
| NM_030696 | Slc16a3,Mct3,Mct4                                      | 0.00001  | -5.08691  |
| BG066654  | Slc16a10,TAT1,PRO0813,9830169E08,2610103N14Rik         | 3.46E-06 | -2.08041  |

|           |                                                         |          |           |
|-----------|---------------------------------------------------------|----------|-----------|
| NM_009196 | Slc16a1,Mct1,AL022710                                   | 1.79E-16 | -2.55001  |
| AK012158  | Skiv2l2,mKIAA0052,2610528A15Rik                         | 2.11E-16 | -1.50528  |
| AI893638  | Six4,AREC3,TrexBF,AI047561                              | 7.60E-09 | -2.05439  |
| NM_012029 | Sitpec,ECSIT                                            | 3.31E-14 | -4.87858  |
| AK002609  | Sirt5,AV001953,0610012J09Rik,1500032M05Rik              | 3.20E-06 | -2.10129  |
| NM_022433 | Sirt3,Sir2l3,AI848213,2310003L23Rik                     | 1.10E-07 | -2.56845  |
| AV332957  | Shox2,OG12,Prx3,SHOT,Og12x,6330543G17Rik                | 0.00077  | -2.68463  |
| AF237702  | Shmt1,Shmt,mshmt,C81125,mshmt1,mshmt2,AI324848,AI385541 | 5.66E-13 | -5.79484  |
| BC016203  | Sharpin,SIPL1,RBCKL1,AW121341,0610041B22Rik             | 1.24E-06 | -1.84717  |
| AW910872  | Sh3rf2,RNF158,AI452083,2310046K19,9130023G24Rik         | 2.98E-07 | -4.63726  |
| NM_015825 | Sh3bgr                                                  | 8.41E-25 | -12.61015 |
| AK008803  | Sh2d4a,SH2A,2210402M20Rik                               | 0.00041  | -4.21737  |
| NM_011361 | Sgk,Sgk1                                                | 0        | -2.25493  |
| AI844814  | Sgcb,43kDa,beta-SG,AI747103,AI844814                    | 6.25E-07 | -2.20389  |
| NM_009161 | Sgca,Asg,50DAG,59kDa,adhalin                            | 8.25E-16 | -3.31303  |
| BB772209  | Sfrs14,MGC66544,mKIAA0365                               | 6.89E-07 | -1.84961  |
| NM_013651 | Sf3a2,66kDa,PRP11,SFA66,Sap62                           | 2.06E-06 | -2.54374  |
| BM114815  | Set7,mKIAA1717,1600028F23Rik                            | 8.54E-12 | -1.85945  |
| AV016566  | Sesn1,PA26,SEST1,AU044290,MGC118148,1110002G11Rik       | 0.00001  | -1.60824  |
| NM_008458 | Serpina3c,1A1,Kalbp,Klkbp                               | 0.00017  | -7.12492  |
| AK002313  | Serhl,AU019786,0610008B10Rik,1110019M09Rik              | 0.00076  | -2.22965  |
| BC006030  | Serbp1,Pairbp1,AL022786,1200009K13Rik,9330147J08Rik     | 9.69E-06 | -1.88401  |
| NM_013759 | Sepx1,SELX,SelR,Sepr,Msrb1,D17Wsu82e                    | 4.44E-06 | -3.01572  |
| BB464434  | Sepw1,selW                                              | 1.72E-19 | -2.32947  |
| BE200310  | Sephs2,Sps2,Ysg3                                        | 4.29E-22 | -2.14842  |
| AK018606  | Senp8,Den1,Nedp1,Prsc2,AU020827,9130010J17Rik           | 5.42E-07 | -2.00785  |
| AV230864  | Sema4c,Semaf,Semai,Semac1,AI426163,mKIAA1739            | 0.00065  | -2.40469  |
| BB114323  | Sema4a,SemB,Semab,AI132332                              | 0.00001  | -2.08837  |
| NM_019414 | Selenbp2,AP56,Lpsb2                                     | 8.49E-17 | -3.80048  |
| NM_009150 | Selenbp1,Lp56,Lpsb,MGC18519                             | 2.56E-10 | -3.84301  |
| NM_021305 | Sec61a2                                                 | 1.97E-18 | -2.06165  |
| BM233963  | Sec24a,AI504915,9430090N21Rik                           | 2.72E-09 | -2.03449  |
| BE197945  | Sdpr                                                    | 2.99E-21 | -4.00044  |
| NM_025321 | Sdhc,AI316496,AU019277,MGC103103,0610010E03Rik          | 2.72E-08 | -2.67612  |
| BC013509  | Sdhd,0710008N11Rik                                      | 9.11E-26 | -2.68163  |
| BF585357  | Sdha,FP,SDH2,SDHF,C81073,4921513A11,2310034D06Rik       | 0        | -2.92882  |
| BG064675  | Sdf4,Cab45                                              | 0.00004  | -1.72782  |
| AU016501  | Scyl1,Ntkl,p105,C85140,2810011O19Rik                    | 0.00009  | -2.06635  |
| BM211317  | Scrn3,Ses3,AI427019,AV002033,4833415E20Rik              | 2.09E-42 | -4.34477  |
| C76618    | Scp2,SCPx,SCP-2,C76618,C79031,                          | 2.51E-09 | -2.13165  |
| BM932452  | Scoc,AA415030,0610011C06Rik,2810002J11Rik               | 8.32E-07 | -1.57096  |
| BB452990  | Scn7a,NaG,Nax,Nav2,Scn6a,Nav2.3,AI642000,1110034K09Rik  | 0.00014  | -1.88835  |
| BE993937  | Scn4b,Gm1471                                            | 4.64E-34 | -22.01772 |
| BQ175340  | Scn2b,Gm183,MGC116602,2810451E09Rik                     | 0.00032  | -2.00645  |
| BC009652  | Scn1b                                                   | 1.78E-07 | -6.61459  |
| NM_013928 | Schip1,Nf2ip,SCHIP-1                                    | 8.90E-16 | -1.5386   |
| NM_009130 | Scg3,Chgd,SgIII,1B1075,AI385542                         | 7.88E-06 | -10.48483 |
| BE133651  | Scd3,4930513N16Rik                                      | 0.00065  | -2.01979  |
| NM_009127 | Scd1,ab,SCD,Scd-1,AA589638,AI265570                     | 2.67E-33 | -8.67416  |
| AB016248  | Sc5d,A830037K02,A830073K23Rik                           | 8.35E-09 | -1.82027  |
| AV172776  | Satb1,AW413156,2610306G12Rik                            | 1.29E-12 | -2.53184  |
| AK010187  | Sar1b,CMRD,Sara2,Sara1b,2310075M17Rik,2900019I22Rik     | 4.38E-26 | -3.36751  |
| BB085063  | Samm50,1110030L07Rik                                    | 1.02E-23 | -1.81628  |
| BQ176258  | Samd8,MGC118303,1110053F04Rik,1700010P07Rik             | 1.06E-08 | -1.64573  |
| NM_020568 | S3-12,mKIAA1881                                         | 2.31E-08 | -26.0367  |
| BG793713  | Ryr1,Ryr,skrr,AI528790                                  | 0.00011  | -2.98338  |
| BQ175050  | Rxra,Nr2b1,RXRalpha1,9530071D11Rik                      | 0.00003  | -2.3663   |
| AK003262  | Rwdd1,0710001K08Rik,2610002D06Rik,2700069A07Rik         | 2.54E-15 | -1.61176  |
| AF005936  | Runx2,Cbf,LS3,AML3,Osf2,Cbfa1,                          | 0.00012  | -2.40646  |
| AB046930  | Runx1,AML1,Cbfa2,Pebp2a2,Pebpa2b,AI462102               | 0.00017  | -3.01916  |
| AV156392  | Rufy1,Rabip4,ZFYVE12,3000002E04Rik                      | 3.69E-06 | -1.77335  |
| NM_130892 | Rtn4ip1,NIMP,D10Erd690e                                 | 1.56E-08 | -4.31528  |
| AK003859  | Rtn4,ASY,NOGO,NSP-CL,                                   | 3.82E-23 | -1.53479  |
| AF038538  | Rtn2,Ms10p,Nspl1,MMS10-P,MGC35990                       | 0.00009  | -4.73708  |
| AW120535  | Rtf1,Gtl7,cbp82,                                        | 0.00012  | -1.69232  |
| AV273445  | Rsnl2,1700024K14Rik,                                    | 1.28E-13 | -5.61165  |

|           |                                                          |          |           |
|-----------|----------------------------------------------------------|----------|-----------|
| AI503514  | Rsn,CYLN1,C81039,                                        | 1.88E-07 | -3.03051  |
| BI110088  | Rsc1a1,RS1,mRS1,1700027M01Rik                            | 1.75E-11 | -3.62296  |
| AV304745  | Rrs1,Rrr,AA415037,D1Erd701e,5730466A07Rik                | 3.58E-07 | -1.79078  |
| BB354941  | Rragd,AI467523,D4Erd174e,5730543C08Rik,C030003H22Rik     | 0.00031  | -2.87224  |
| BB737182  | Rps6ka2,Rsk3,90kDa,p90rsk,pp90rsk,D17Wsu134e,Rps6ka-rs1  | 0        | -5.34075  |
| BG069849  | Rpp30,TSG15,Rnasep2                                      | 8.26E-08 | -1.68771  |
| NM_009087 | Rpo1-3,16kDa,mRPA16,MGC107156,1110003G10Rik              | 1.77E-10 | -1.57859  |
| NM_009086 | Rpo1-2,RPA2,128kDa,RPA116,RPA135,D630020H17Rik           | 1.37E-06 | -1.91639  |
| NM_025425 | Rpl3l,1110057H16Rik                                      | 0        | -100      |
| NM_009075 | Rpia,RPI                                                 | 4.69E-14 | -2.21031  |
| BM244983  | Rpa1,Rpa,RF-A,RP-A,70kDa,AA589576,AW557552,5031405K23Rik | 0.00037  | -1.76413  |
| BB050663  | Rora,sg,ROR1,ROR2,ROR3,Nr1f1,staggerer,9530021D13Rik     | 3.25E-10 | -3.38681  |
| BB540667  | Rnpep1,AI894167,1110014H17Rik                            | 1.60E-07 | -1.92229  |
| AK014739  | Rnmtl1,HC90,AI255153,RP23-147P4.7,4833420N02Rik          | 9.22E-10 | -1.87027  |
| BC021778  | Rnf8,AIP37,3830404E21Rik                                 | 0.00006  | -2.04849  |
| BG069791  | Rnf7,SAG,Rbx2                                            | 0.00009  | -7.49583  |
| NM_030564 | Rnf34,RIFF,C88279,MGC7670,AW061037,AW536122,BC004042     | 2.14E-07 | -1.74365  |
| AK012288  | Rnf32,Lmbr2,                                             | 6.36E-06 | -2.05914  |
| BG817292  | Rnf28                                                    | 8.16E-17 | -3.2264   |
| AK016137  | Rnf139,4930555P18Rik                                     | 2.47E-18 | -2.48956  |
| AK011088  | Rnf130,GP,G1rp,G1RZFP,GOLIATH,2510042A13Rik              | 0.00008  | -1.62874  |
| AK004847  | Rnf128,GRAIL,Greul1,AI987883,1300002C13Rik               | 3.19E-33 | -11.19261 |
| BB765679  | Rnf123,Kpc1,BC003945                                     | 1.61E-42 | -4.93205  |
| AI835553  | Rilp,Gm857,AI835553,RP23-384C18.10                       | 1.27E-11 | -10.92765 |
| BB667093  | Ric8b,Ric-8,BC051080,MGC58970                            | 1.80E-12 | -2.05637  |
| AF378088  | Rhou,Arhu,G28K,WRCH1,mG28K                               | 0.00046  | -2.1475   |
| BM201133  | Rhot2,Arht2,Miro2,MGC31216                               | 0.0001   | -3.94468  |
| BB612707  | Rgmb,DRAGON,1110059F19Rik                                | 0.00023  | -1.8262   |
| BB827685  | Rgma,BC059072,MGC38550,MGC69915,C230063O06               | 3.70E-25 | -5.19777  |
| BC023147  | Rg9mtd1,Rnmt1,MGC118020,D16Erd454e,1300018J16Rik         | 0.0001   | -1.71219  |
| NM_019437 | Rfk,KOI-4,AF031381,0610038L10Rik                         | 6.42E-15 | -1.6397   |
| NM_019570 | Rev1l,Rev1,AU022044,MGC66950,1110027I23Rik               | 3.65E-28 | -2.00141  |
| NM_020509 | Retnla,HIMF,Xcp2,Fizz1,RELMa,cytokine,                   | 3.65E-10 | -38.82521 |
| NM_022984 | Retn,ADSF,Rstn,Xcp4,Fizz3                                | 8.34E-22 | -45.08131 |
| BF471533  | Ret,PTC,RET9,RET51                                       | 3.01E-11 | -8.46173  |
| AW556696  | Rere,ARG,ARP,Atr2,DNB1,                                  | 2.11E-08 | -2.07447  |
| NM_025654 | Rdm1,Rad52b,AW212028,2410008M22Rik                       | 0.00059  | -3.2396   |
| NM_023697 | Rdh14,PAN2,AW215439,3110030G19Rik                        | 2.99E-28 | -3.44839  |
| BC025872  | Rcsd1,BC025872,MGC32399,A430105K13Rik                    | 0.00001  | -2.35457  |
| BC004574  | Rcl1,Rnac,RPCL1,C76567,AI789745,2310040A02Rik            | 0.0002   | -1.66408  |
| NM_019712 | Rbx1,AA517855,1500002P15Rik                              | 3.35E-24 | -1.86949  |
| U47333    | Rbl2,Rb2,p130                                            | 3.10E-23 | -2.118    |
| BB557382  | Rbed1,RBM29,ELMOD3,AI844780,MGC27575,C330008I15Rik       | 0.00077  | -2.62449  |
| BE570980  | Rb1cc1,Cc1,FIP200,                                       | 5.88E-37 | -1.86272  |
| NM_009028 | Rasl2-9,M2,Ran,Ran/M2                                    | 7.00E-06 | -2.1409   |
| AK014511  | Rasl12,4631404I11Rik                                     | 1.88E-07 | -1.60203  |
| BB042252  | Rasgrp3,Gm327,BC066069,MGC74365,MGC79207                 | 0.00013  | -2.89665  |
| BC026377  | Rasd2,Rhes,TEM2,TEM-2,AU045414,4930526B11Rik             | 0.00033  | -6.8004   |
| BB266455  | Rarb,Hap,Nr1b2,RARbeta2,A830025K23                       | 1.03E-12 | -3.20337  |
| BC020532  | Rapgef3,Epac,Epac1,MGC19192,2310016P22Rik,9330170P05Rik  | 0.0001   | -2.21708  |
| AW108431  | Ranbp6,FLJ111120,C630001B19                              | 3.59E-09 | -1.66132  |
| AW536621  | Ranbp5,IMB3,IPO5,Kpnb3,                                  | 1.12E-09 | -1.53707  |
| BB770528  | Rai2,3f8                                                 | 4.98E-07 | -2.53194  |
| AU040322  | Rai16,G430067P06Rik                                      | 8.63E-20 | -2.00836  |
| NM_029780 | Raf1,Craf1,Raf-1,                                        | 0.00063  | -1.52964  |
| BI256061  | Rad23a,mHR23A,AL024030,2310040P19Rik                     | 5.89E-07 | -2.85129  |
| BC012214  | Rabgga,gm                                                | 3.04E-06 | -2.278    |
| BB280137  | Rabgef1,Rin2,Rab5ef,Rabex5                               | 2.75E-08 | -1.81104  |
| AV377824  | Rabgap1,Gapcena,KIAA4104,MGC30493,mKIAA4104              | 0.00002  | -3.22876  |
| NM_019773 | Rab9,AI195561,Sid6061p,2410064E05Rik                     | 2.00E-06 | -1.52044  |
| NM_009003 | Rab4a,Rab4,AI848268                                      | 0.00006  | -2.26824  |
| AV235634  | Rab3ip,Rabin3,Gtpat12,MGC90794,B230311A06                | 2.82E-21 | -3.35136  |
| NM_009001 | Rab3a                                                    | 0.00006  | -3.05962  |
| AK012286  | Rab28,MGC8039,AW496496,2700023P08Rik                     | 0.00015  | -1.65083  |
| BB767504  | Rab21,9630024B22                                         | 0.00036  | -1.65005  |
| BI083615  | Rab11a                                                   | 1.42E-24 | -1.86622  |

|           |                                                          |          |           |
|-----------|----------------------------------------------------------|----------|-----------|
| BF465974  | Rab10,AW107754                                           | 1.35E-08 | -1.70244  |
| AW550283  | Rab1,Gtbp,Ypt1,Rab-1,Rab1A,mKIAA3012                     | 1.58E-16 | -1.64144  |
| BB517855  | Qrs1,GatA,C80053,2700038P16Rik                           | 0        | -2.1599   |
| BC002107  | Qdpr,Dhpr,PKU2,D5Erd371e,2610008L04Rik                   | 0        | -3.26118  |
| BB314594  | Qars,GLNRS,C80286,MGC105238,                             | 5.39E-07 | -1.76304  |
| NM_011224 | Pygm,AI115133                                            | 2.72E-25 | -12.94885 |
| NM_133198 | Pygl                                                     | 2.49E-09 | -3.01673  |
| NM_021534 | Pxmp4,Pmp24,3010018P03Rik                                | 0.00038  | -2.33818  |
| AF309644  | Pxmp2,22kDa,PMP22                                        | 1.01E-10 | -5.84794  |
| NM_013645 | Pvalb,PV,Pva                                             | 0.0001   | -14.69298 |
| BB470225  | Ptx3,TSG-14,AI607804                                     | 5.91E-08 | -5.64297  |
| NM_011220 | Pts,PTPS                                                 | 6.67E-12 | -1.78413  |
| AA921444  | Ptpn6,me,hcp,Hcph,Ptp1C,SHP-1,motheaten                  | 0.00011  | -2.14445  |
| BI247018  | Ptpmt1,PLIP,1110001D10Rik,2810004N20Rik                  | 0        | -2.21031  |
| BB014781  | Ptpla                                                    | 0.00013  | -1.65315  |
| AK014601  | Ptp4a3,Prl-3,AV088979                                    | 0.00016  | -2.15253  |
| BE134116  | Ptp4a2,Prl-2,MGC102154,MGC103400                         | 5.27E-15 | -1.76139  |
| BB397672  | Ptk9l,Twf2,Ptk9r,AU014993,A6-related                     | 4.66E-10 | -1.87125  |
| NM_011196 | Ptger3,EP3,Pgerep3,Ptgerep3                              | 0.00001  | -9.25387  |
| NM_008961 | Pter,Mpr56-1,AI790318                                    | 5.53E-06 | -2.32085  |
| BB490580  | Ptdss2,PSS2,AI481134,AI988017                            | 0.00072  | -2.23644  |
| BC002123  | Pstpip2,MAYP                                             | 4.14E-28 | -4.52486  |
| AV298428  | Pstk,Gm1099,R75284,5430423O14Rik,5730458D16Rik           | 1.98E-10 | -3.78557  |
| NM_133900 | Psph,PSP,PSPase,AI480570                                 | 5.85E-08 | -1.61669  |
| BM195254  | Psme4,TEMO,AA409398,AU041366,KIAA0077,mKIAA0077          | 1.19E-12 | -1.59756  |
| NM_011189 | Psme1,PA28a,AW413925,MGC113815                           | 1.27E-10 | -1.70732  |
| BC004694  | Psm12,P55,AI480719,1500002F15Rik                         | 8.94E-12 | -1.58575  |
| AW208944  | Psmc6,AI451058,2300001E01Rik                             | 4.67E-13 | -1.70805  |
| AF113598  | Psg28,MGC117566,MGC117567                                | 0.00057  | -2.10838  |
| AB013464  | Pscd1,CLM1,CTH-1,CYTIP,KIAA4240,mKIAA4240                | 4.81E-15 | -2.30836  |
| BC024903  | Prss32,mT5,tryptase-5,2010001P08Rik                      | 0.00026  | -1.86377  |
| BB175323  | Prrg4,TMG4,MGC117538,993011118Rik                        | 0.00035  | -4.43819  |
| BB164509  | Prrg3,Gm368                                              | 3.73E-10 | -2.62794  |
| AK014046  | Prr6,AA671303,3110013H01Rik,RP23-234K24.4                | 3.95E-16 | -3.52966  |
| AK011304  | Prps1,C76571,C76678,Prps-1,2310010D17Rik                 | 1.31E-25 | -2.21904  |
| AA409562  | Prp19,PSO4,Snev,                                         | 1.48E-11 | -1.85428  |
| BC024104  | Proz,1300015B06Rik                                       | 5.11E-09 | -4.71198  |
| BB091323  | Prnp,PrP,PrPC,Sinc,CD230,PrPSc,Prn-i,Prn-p               | 0.00003  | -2.06009  |
| AK005458  | Prlpn,PLP-N,1600014J19Rik                                | 2.91E-08 | -5.11392  |
| BF457576  | Prkrir,Dap4,Rpkrir,MGC31389,2900052B10Rik                | 5.14E-13 | -1.59282  |
| AB062122  | Prkcq,PKC-0,AW494342,PKC-theta,A130035A12Rik             | 0        | -11.21904 |
| BB335101  | Prkce,PKC[e],R75156,5830406C15Rik                        | 4.25E-06 | -2.11438  |
| NM_008837 | Prkcbp,Pick1                                             | 1.01E-08 | -3.76419  |
| BM246539  | Prkca,Pkca                                               | 1.14E-21 | -3.27932  |
| AK004336  | Prkar2a,AI317181,AI836829,Rll(alpha),1110061A24Rik       | 0.00019  | -1.89689  |
| AV223660  | Prkab2,AW049591,BB124140,5730553K21Rik                   | 8.16E-07 | -2.23889  |
| BB612385  | Prkaa2,A830082D05,2310008I11Rik                          | 4.30E-19 | -4.90299  |
| BM246706  | Prei4,mKIAA1434,2310004G06Rik,2310032D16Rik              | 2.60E-07 | -3.47159  |
| BC008174  | Prdx5,AOPP,PrxV,Pmp20,Prdx6,AOEB166                      | 1.15E-10 | -1.68954  |
| NM_007452 | Prdx3,Aop1,Ef2l,Mer5,Prx3,SP22,TDXM,D0Tohi1,AW822249     | 6.14E-11 | -2.11735  |
| BB356786  | Prdm16,mel1,KIAA1675,mKIAA1675,5730557K01Rik             | 3.50E-08 | -3.20369  |
| BG065679  | Ppp6c,2310003C10Rik                                      | 0        | -2.31815  |
| NM_008915 | Ppp3cc,Calnc                                             | 0.00052  | -2.13754  |
| AK004360  | Ppp3cb,Calnb,CnAbeta,1110063J16Rik                       | 6.13E-17 | -1.72384  |
| AI313926  | Ppp3ca,CN,CnA,Caln,Calna,AI841391,AW413465,2900074D19Rik | 0.00013  | -2.01431  |
| BM247370  | Ppp2r5c,AI060890,AW545884,                               | 0.00005  | -1.5182   |
| BC023062  | Ppp2r5a,MGC38798,PR61alpha                               | 2.80E-07 | -2.25217  |
| AF366393  | Ppp2r2d,MDS026,D7Erd753e,1300017E19Rik                   | 0.00009  | -1.63634  |
| BF730541  | Ppp2r1b,AI790395,2410091N08Rik                           | 1.26E-07 | -2.51208  |
| BQ176864  | Ppp1r3c,PTG,Ppp1r5                                       | 0.00001  | -5.37328  |
| NM_080464 | Ppp1r3a,GM,RG1,RGL,MGC124391,MGC124392                   | 2.73E-09 | -3.71966  |
| NM_021391 | Ppp1r1a,I-1,0610038N18Rik                                | 2.08E-23 | -47.30107 |
| AW492237  | Ppp1r12b,AI132431,A330043L12,B230333M12,1810037O03Rik    | 2.54E-13 | -4.56231  |
| AK017392  | Ppp1cb,1200010B19                                        | 2.48E-07 | -1.91847  |
| AV255921  | Ppm2c,Gm1024                                             | 2.60E-06 | -3.04794  |
| BB035578  | Ppm1I,PP2C,Pp2ce,                                        | 0        | -4.63927  |

|           |                                                         |          |           |
|-----------|---------------------------------------------------------|----------|-----------|
| AK013741  | Ppm1k,MGC115965,2900063A19Rik,A930026L03Rik             | 6.14E-11 | -2.15126  |
| AK009235  | Ppm1j,Ppp2cz,2310008J22Rik                              | 1.19E-06 | -7.88464  |
| AJ271836  | Ppm1b,PP2CB,MGC106489                                   | 6.77E-13 | -1.58945  |
| AV209130  | Ppifs,4930520F12Rik                                     | 9.81E-45 | -4.98103  |
| NM_134084 | Ppif,PPlase,AW457192                                    | 0        | -12.89572 |
| AV338634  | Ppgb,PPCA,AU019505                                      | 3.31E-11 | -3.54781  |
| AV305746  | Ppat,C79945,AA408689                                    | 2.63E-07 | -2.58929  |
| BB752393  | Ppargc1a                                                | 1.12E-19 | -14.54856 |
| NM_011146 | Pparg,Nr1c3,PPAR-gamma,PPAR-gamma2                      | 6.15E-07 | -8.13405  |
| BC016136  | Ppapdc3,D830019K17Rik                                   | 5.48E-09 | -9.78669  |
| NM_026398 | Pop5,Rnasep3,AW049989,1500019J17Rik,2700077E03Rik       | 3.03E-15 | -2.91788  |
| NM_008897 | Pon3,AI786302,2810004E20                                | 2.57E-09 | -2.14501  |
| NM_011134 | Pon1,Pon                                                | 9.53E-07 | -8.28446  |
| BB739221  | Polrmt,4932416K13,1110018N15Rik                         | 6.49E-12 | -2.3803   |
| BC027083  | Polr3gl,AI131619,2010003I19Rik                          | 0.00027  | -2.00349  |
| AV102258  | Polr2l,2510029B14Rik                                    | 1.78E-08 | -1.76445  |
| NM_011293 | Polr2j,Polr2i,Rpb11a,Rpo2-4,14.5kDa                     | 4.54E-17 | -1.89693  |
| NM_009090 | Polr2c,33kDa,Rpo2-3,mRBP31,MGC118242                    | 0.00015  | -1.77226  |
| BB797282  | Poldip2,Pdip38,RP23-399H5.6,1300003F06Rik               | 5.40E-22 | -2.27288  |
| BG094331  | Polb                                                    | 0.00001  | -1.52629  |
| BI410130  | Pnrc1,B4-2,PRR2,Prol2,5730463C12Rik                     | 2.33E-08 | -1.97682  |
| AK003207  | Pnpla2,TTS-2.2,0610039C21Rik,1110001C14Rik              | 0.00033  | -4.99886  |
| NM_021549 | Pnkp,PNK,1810009G08Rik                                  | 0.00015  | -2.17973  |
| AI157548  | Pmpcb,MPPB,MPP11,MPPP52,3110004O18Rik                   | 9.12E-18 | -1.59005  |
| AK004549  | Pmpca,P-55,Alpha-MPP,1200002L24Rik,4933435E07Rik        | 8.09E-30 | -2.07967  |
| BB768495  | Plp1,jp,Plp,msd,rsh,DM20,jimpy                          | 7.30E-07 | -2.35194  |
| AK002622  | Pln,PLB                                                 | 0.00064  | -1.93826  |
| BM208085  | Plekhg3,BC030417,MGC40768                               | 0.00063  | -1.59594  |
| AF189817  | Plekhb2,Evt2,Phdc,evt-2,AU018239,2310009M15Rik          | 6.78E-09 | -2.63115  |
| NM_013746 | Plekhb1,PHR1,evt-1,Phret1,AI315628                      | 0        | -9.08752  |
| NM_008876 | Pld2                                                    | 0.00027  | -1.90183  |
| BM207017  | Plcl2,Plce2,PLC-L2,mKIAA1092                            | 9.61E-07 | -4.73545  |
| AV257260  | Plcd4                                                   | 4.64E-43 | -100      |
| BB794831  | Plcb1,Plcb,AI132408,mKIAA0581,3110043I21Rik             | 0.00026  | -2.08528  |
| AI508243  | Plac9,MGC41689                                          | 0.00052  | -3.01449  |
| AV235932  | Pla2g4e,C230096D22,2310026J01Rik                        | 1.26E-33 | -8.79192  |
| BC023004  | Pla2g1br                                                | 0.00095  | -2.35346  |
| BQ175824  | Pknox2,Prep2,D230005H23Rik                              | 0.00002  | -2.1017   |
| AK010212  | Pkia,AI415001,PKIalpha                                  | 1.03E-10 | -1.69303  |
| AV020525  | Pitpnc1,RDGBB,Dnr411,RDGBB1                             | 0        | -10.82031 |
| AF316872  | Pink1,BRPK,AU042772,AW557854,mFLJ00387,1190006F07Rik    | 0        | -3.37863  |
| BF318238  | Pigp,Dcrc,Dscr5                                         | 8.83E-44 | -2.84548  |
| AB046537  | Pi16,Cripi,1200009H11Rik                                | 0.00066  | -2.81019  |
| NM_010726 | Phyh,PAHX,Lnap1,AI256161,AI265699                       | 0        | -6.74978  |
| BE852433  | Phf2,C77923,AI447096,1110054G21Rik,9530062N20Rik        | 0        | -4.66357  |
| BB650419  | Phpt1,Php14,1700008C22Rik                               | 3.84E-08 | -2.42927  |
| BC025612  | Phospho2,Phos2,AI661517,AU021728,AV006103,1700048E23Rik | 7.07E-10 | -1.60433  |
| BC024670  | Phlpp,SCOP,Plekhe1,AI836256,mKIAA0606                   | 0.00032  | -1.57887  |
| NM_011079 | Phkg1,Phkg                                              | 0        | -74.05472 |
| BM233125  | Phkb,AI463271,MGC62514                                  | 0        | -6.75151  |
| AA422311  | Phka1,Phka,5330411D17,9830108K24Rik                     | 4.81E-10 | -12.65071 |
| BB308157  | Phf20,6820402O20Rik                                     | 2.96E-06 | -1.83684  |
| BG065238  | Phf17,Jade1,AU041499,mKIAA1807,D530048A03Rik            | 8.46E-10 | -1.63331  |
| BB791424  | Phb2,BAP,REA,Bap37,Bcap37,AU044498                      | 4.06E-06 | -1.57107  |
| AK010619  | Phb,BAP32                                               | 6.77E-07 | -2.28936  |
| BB183423  | Pgm2l1,BM32A,AI553438,4931406N15Rik                     | 1.84E-09 | -2.11352  |
| BC008527  | Pgm2,Pgm1,Pgm-2,AA407108,AI098105,2610020G18Rik         | 0        | -14.47657 |
| AV305101  | Pgk1,Pgk-1,MGC118097                                    | 1.74E-12 | -1.82806  |
| NM_018870 | Pgam2                                                   | 5.07E-16 | -6.06368  |
| NM_019410 | Pfn2,Pfn                                                | 1.33E-32 | -3.43293  |
| NM_021514 | Pfkm,Pfka,PFK-M,AI131669                                | 1.79E-09 | -3.20129  |
| BE136572  | Pfkfb4,C230090D14                                       | 1.45E-19 | -4.73003  |
| AV282911  | Pfkfb3,iPFK-2,E330010H22Rik                             | 0.00017  | -2.5375   |
| X98848    | Pfkfb1                                                  | 1.42E-16 | -19.79454 |
| NM_008822 | Pex7,MmPEX7                                             | 0        | -3.4161   |
| BB252740  | Pex6,MGC6455,AI132582                                   | 1.75E-07 | -1.96093  |

|           |                                                             |          |           |
|-----------|-------------------------------------------------------------|----------|-----------|
| NM_023041 | Pex19,Pxf                                                   | 8.09E-07 | -1.70148  |
| NM_134025 | Pex12,AI451906                                              | 0.00002  | -1.54825  |
| AV377516  | Pex11a,PEX11alpha                                           | 0.00005  | -2.78256  |
| BG068580  | Pet112I,MGC11629,9430026F02Rik                              | 0.00069  | -2.94263  |
| BB757992  | Per3,mPer3,2810049O06Rik                                    | 9.43E-08 | -2.38327  |
| NM_008820 | Pep4,Pep-4                                                  | 4.72E-11 | -2.19813  |
| BB356493  | Penk1,ENK,PPA,Penk,AI326464                                 | 0.00049  | -2.36659  |
| NM_023523 | Pecr,2400003B18Rik                                          | 1.48E-26 | -3.1881   |
| AK009478  | Peci,DRS1,ACBD2,HCA88                                       | 4.63E-13 | -1.64096  |
| NM_018884 | Pdzm3,LNX3,Semcap3,AI429718,AL023082,1110020C07Rik          | 1.15E-29 | -2.43668  |
| BG063905  | Pdxk,C77999,AA119688,2310036D04Rik                          | 8.86E-06 | -1.68008  |
| NM_026131 | Pdlim7,Enigma,AV007930,1110003B01Rik,2410002J21Rik          | 3.35E-14 | -4.54431  |
| AK009464  | Pdlim5,Enh,LIM,Enh1,Enh2,Enh3,C87059,AI987914,1110001A05Rik | 3.26E-27 | -2.54285  |
| NM_016798 | Pdlim3,ALP,Actn2lp,AI463105                                 | 0.00002  | -1.58854  |
| NM_133667 | Pdk2                                                        | 4.12E-14 | -18.81544 |
| BB553369  | Pdk1,B830012B01,D530020C15Rik                               | 3.24E-06 | -1.92058  |
| BB667859  | Pdhx,E3bp,Pdx1,AI481367                                     | 1.44E-12 | -2.55093  |
| AK011810  | Pdhh,C81408,AL024199,2610103L06Rik                          | 1.10E-11 | -4.85175  |
| BF681901  | Pdha1,Pdha-1                                                | 1.02E-29 | -1.92983  |
| BB699957  | Pdgfrl,AV013190,1110039P19Rik                               | 1.53E-22 | -3.12015  |
| AU015378  | Pde7a,AU015378,AW047537                                     | 2.86E-16 | -1.85693  |
| BG793493  | Pde4b,Dpde4,dunce,R74983                                    | 1.32E-06 | -2.3233   |
| BC003292  | Pdcd8,Hq,AIF,mAIF,MGC5706                                   | 1.52E-28 | -2.28025  |
| BI526195  | Pdcd2,Pcd2,RP-8,AI528543                                    | 3.22E-06 | -1.63431  |
| BB280291  | Pcyt1a,Ctpct,CTalpha,Ctalpha                                | 1.17E-41 | -2.08489  |
| NM_008797 | Pcx,Pc                                                      | 7.05E-06 | -4.84106  |
| NM_008791 | Pcp4,Pcp-4,P16Rimb19                                        | 3.68E-04 | -2.21573  |
| AF352788  | Pcolce2,Pcpe2,2400001O18Rik                                 | 1.24E-22 | -6.51134  |
| BG073499  | Pcnx,Pcnx1,AF096286,AI327143,AI413187                       | 0.0001   | -1.79631  |
| BG069597  | Pcnt,KEN,Pcnt2,C86676,kendrin,AW476095                      | 5.89E-08 | -2.07591  |
| BM117243  | Pcmt2,AI314201,MGC36470,5330414D10Rik                       | 2.36E-24 | -2.16535  |
| AK018402  | Pcmt1,MGC117877,8430411F12Rik,A030012M09Rik                 | 0.00002  | -1.7301   |
| AV009995  | Pcmt1,PIMT,C79501                                           | 1.58E-07 | -2.12599  |
| NM_023662 | Pcm1,2600002H09Rik,9430077F19Rik,C030044G17Rik              | 0.0004   | -1.8561   |
| AW106963  | Pck1,PEPCK,Pck-1,AI265463                                   | 0.00083  | -45.40705 |
| AK002387  | Pcgf5,AI324127,0610009F02Rik,                               | 9.14E-20 | -1.89755  |
| BB787147  | Pccb,R74805,AI314687,1300012P06Rik                          | 0.00044  | -3.02517  |
| AY046947  | Pcca,C79630                                                 | 3.11E-17 | -2.44781  |
| AW556977  | Pcbp2,Hnrpx,AW412548,alphaCP-2                              | 6.34E-06 | -1.99776  |
| AV094898  | Pcaf,AI461839,AW536563,A930006P13Rik                        | 7.42E-07 | -1.68262  |
| AV220340  | Pbxip1,MGC38361,4732463H20Rik                               | 4.35E-07 | -1.64086  |
| AW989410  | Pbef1,Pbef,Nampt,AI314458,1110035O14Rik                     | 1.24E-12 | -2.95211  |
| AK014142  | Parp6,1700119G14Rik                                         | 0.00076  | -1.9239   |
| AF126717  | Parp1,PARP,PPOL,                                            | 0.00002  | -1.95908  |
| BB255468  | Park7,Dj1,DJ-1                                              | 0        | -3.89507  |
| AV103696  | Paqr9,1700020G04Rik                                         | 2.03E-09 | -3.19165  |
| BM119773  | Pank4,R75150,D03003112Rik                                   | 1.08E-14 | -2.72965  |
| BF456404  | Pak1,Paka,PAK-1,AW045634                                    | 1.06E-09 | -3.90872  |
| NM_026420 | Paip2,AU045972,2310050K10Rik                                | 6.54E-32 | -1.51479  |
| BC019726  | Paip1                                                       | 0.00011  | -1.93642  |
| BE688382  | Pafah1b1,Lis1,Mdsh,LIS-1,Ms10u,Pafaha,                      | 1.94E-27 | -1.63371  |
| NM_008812 | Padi2,Pdi,Pdi2,mKIAA0994                                    | 0.00038  | -2.20238  |
| NM_130881 | Pabpc4,MGC6685,MGC11665                                     | 0.0001   | -2.07105  |
| AK013132  | Oxsr1,Osr1,AI462649,AW209236,                               | 0.00019  | -1.79009  |
| AW548944  | Oxr1,C7,C7B,MGC103081,MGC107466,2210416C20Rik               | 2.34E-25 | -1.53921  |
| AV213379  | Oxct1,Oxct,Scot-s,2610008O03Rik                             | 0        | -2.69067  |
| AU017520  | Ovgp1,OGP,MOGP,muc9,Chit5,120kDa,AU016433,AU019448          | 0.00094  | -1.53325  |
| BC017609  | Otx2,E130306E05Rik                                          | 0.00009  | -3.62608  |
| AK004546  | Ostm1,gl,HSPC019,AW123348,1200002H13Rik                     | 1.98E-08 | -1.71036  |
| BG067251  | Osgepl1,AA416452,MGC13061,2610001M19Rik                     | 9.15E-36 | -4.2693   |
| NM_133676 | Osgep,GCPL-1,PRSMG1,1500019L24Rik                           | 4.73E-07 | -1.50976  |
| BB113429  | Osbpl9,ORP-9,AU015843,MGC30367,MGC38458,2600011I06Rik       | 0.00028  | -2.34115  |
| BG070848  | Osbpl6,ORP-6,AI596402,KIAA4128                              | 5.54E-18 | -3.90169  |
| NM_020573 | Osbpl1a,Gm753,Osbpl1b,G430090F17Rik                         | 3.55E-10 | -2.16337  |
| BC003443  | Osbp,AW559088,KIAA4220,mKIAA4220,1110018F06Rik              | 0.00002  | -1.55566  |
| BC025572  | Ormdl1,C730042F17Rik                                        | 8.55E-07 | -1.96954  |

|           |                                                         |          |           |
|-----------|---------------------------------------------------------|----------|-----------|
| BE628912  | Orm1,Agp-1,Agp-2,Orm-1                                  | 8.32E-13 | -13.51781 |
| BC005604  | ORF28,BC020175,MGC27620                                 | 1.56E-29 | -5.21383  |
| NM_011959 | Orc5l,Orc5,MmORC5,AL033327                              | 0.00063  | -1.70813  |
| BB770843  | Optn,NRP,FIP2,HYPL,4930441O07Rik                        | 5.54E-07 | -3.15707  |
| NM_008106 | Opn1mw,Gcp                                              | 0.00001  | -12.10337 |
| BB383296  | Opcml,Gm181,Obcam,                                      | 0.00041  | -6.58373  |
| BB475273  | Opa3,Gm472,Gm1425,D630048P19Rik                         | 0.00003  | -1.64908  |
| BB324282  | Opa3,Gm472,Gm1425,D630048P19Rik                         | 9.63E-13 | -3.73964  |
| BC025160  | Opa1,AI225888,AI847218,mKIAA0567,1200011N24Rik          | 6.86E-10 | -1.77771  |
| NM_012050 | Omd,SLRR2C                                              | 0.00096  | -3.63512  |
| BC016238  | Oma1,MPPR-1,ZMPOMA1,2010001O09Rik                       | 5.47E-12 | -1.90539  |
| NM_019485 | Olfir70,mOR6,MOR262-10                                  | 0.00053  | -3.238    |
| AI427540  | Ogfrl1,2210417C17Rik                                    | 1.13E-10 | -3.63685  |
| BC013670  | Ogdh,AA409584,                                          | 1.05E-21 | -4.16773  |
| BM937735  | Ociad2,MGC51598,1810027I20Rik                           | 2.93E-06 | -3.46449  |
| BM124337  | Obscn,Gm878,UNC89,BC046431,MGC51514                     | 7.94E-14 | -6.21613  |
| BB396657  | Nupl2,CG1,Nlp1,NLP-1,AV116043                           | 0.00012  | -2.36031  |
| NM_018815 | Nup210,gp190,gp210,Pom210,AI836801,9830001L10           | 1.14E-10 | -9.75947  |
| BB314153  | Nup133,4832420O05Rik                                    | 2.41E-07 | -1.7732   |
| AK011172  | Nudt7,1300007B24Rik,2210404C19Rik                       | 0        | -11.61166 |
| BB043522  | Nudt6,Asfgf2b,MGC27904                                  | 0.0006   | -1.97897  |
| NM_027722 | Nudt4,DIPP2,HDCMB47P,DIPP2beta,DIPP2alpha,4933436C10Rik | 6.28E-15 | -2.87692  |
| NM_025539 | Nudt2,APAH1,AA939917,2310051L06Rik                      | 3.01E-40 | -2.06967  |
| BG070689  | Nudt19,D7Rp2,RP2-r,RP2-s,D7Rp2e,D7Rp2-r,D7Rp2-s         | 0.00035  | -2.72775  |
| NM_026341 | Nudt13,4933433B15Rik                                    | 2.55E-13 | -2.34175  |
| AK018117  | Nudt12,0610016O18Rik                                    | 4.16E-09 | -6.00614  |
| AK010827  | Nubpl,2410170E07Rik                                     | 1.72E-09 | -2.60892  |
| NM_008747 | Ntsr2,NT2R,NTRL                                         | 0.00001  | -3.74499  |
| AI462899  | Ntf5,NT4,NT-4,Ntf4,NT4/5,Ntf-5,AI462899,2900040K06Rik   | 0.00038  | -6.99547  |
| AV037573  | Ntf5c3,p36,Ntf5y,PN-1,                                  | 1.50E-39 | -3.8637   |
| NM_010444 | Nr4a1,Hmr,N10,TR3,                                      | 3.28E-09 | -6.9462   |
| BQ174990  | Nr3c2,MR,Mlr                                            | 7.83E-10 | -11.65565 |
| AW908839  | Nr3c1,GR,Grl1,Grl-1                                     | 4.73E-10 | -1.66235  |
| BB547741  | Nr2c1,TR2,80.3,Eenr,Tr2-11,4831444H07Rik                | 0.00003  | -2.94152  |
| AV225789  | Nr1i3,CAR,CAR1,CAR2,MB67,                               | 4.37E-07 | -1.76685  |
| NM_011584 | Nr1d2,RVR,beta,Rev-erb                                  | 4.16E-19 | -1.83688  |
| NM_016902 | Nphp1                                                   | 0.00099  | -1.73395  |
| AK010446  | Npepps,Psa,goku,MP100,R74825,MGC102199                  | 7.68E-08 | -1.80409  |
| BB627486  | Nova1,Nova-1,9430099M15Rik                              | 2.91E-08 | -15.56005 |
| AK004120  | Nola3,NOP10,NOP10P,1110036B12Rik                        | 1.35E-14 | -1.64296  |
| AK020079  | Nol9,AI449622,AW490720,4632412I24Rik,6030462G04Rik      | 3.50E-07 | -5.45199  |
| AW060738  | Nol7,NOP27,RARG-1,2210008F15Rik,5730556I21Rik           | 0.00008  | -1.71417  |
| AK006371  | Nnmt                                                    | 4.81E-07 | -2.36604  |
| BC005737  | Nmnat3,PNAT3,MGC102340,4933408N02Rik                    | 0.00002  | -2.40361  |
| AF260924  | Nmnat1,nmnat,D4Cole1e,2610529L11Rik,5730441G13Rik       | 7.84E-06 | -5.64626  |
| NM_018757 | Nme6,nm23-M6                                            | 0.00037  | -2.43452  |
| NM_026523 | Nmb,3110023K12Rik                                       | 0.00074  | -5.72367  |
| AK010285  | Nkiras1,KBRAS1,kappaB-Ras1,2400004O09Rik                | 7.04E-18 | -2.45545  |
| BC020153  | Nit2,D16ErtD502e,1190017B19Rik                          | 1.02E-10 | -1.73404  |
| BB309133  | Nhlrc1,AI505271,B230309E09Rik                           | 4.18E-15 | -2.77354  |
| NM_021504 | Ngly1,Png1,PNGase,1110002C09Rik                         | 2.41E-09 | -1.58348  |
| AV250496  | Nfyb,Cbf-A,AA985999                                     | 0.00005  | -1.53219  |
| NM_010911 | Nfs1,m-Nfsl,AA987187                                    | 0        | -2.8863   |
| AW049660  | Nfix                                                    | 6.89E-22 | -1.91595  |
| BI687652  | Nfib,6720429L07Rik,E030026I10Rik                        | 2.49E-15 | -3.83739  |
| BB089547  | Nfia,NF1-A,1110047K16Rik,9430022M17Rik                  | 0.00002  | -2.30888  |
| BB356861  | Nfatc1,NFAT2,NFATc,NF-ATc,                              | 2.90E-43 | -3.74491  |
| BM225804  | Nexn,NELIN,AA553326,1110046H09Rik                       | 2.58E-26 | -2.13898  |
| AK004524  | Neurl2,Ozz,Ozz-E3                                       | 7.00E-15 | -7.59643  |
| AK009828  | Neu2,MBS,MSS,MTS                                        | 5.29E-06 | -28.88873 |
| AI595938  | Neb,AI595938                                            | 9.26E-09 | -1.8235   |
| AV046532  | Ndufv2,2900010C23Rik                                    | 1.20E-25 | -2.43174  |
| NM_133666 | Ndufv1                                                  | 3.32E-13 | -2.65611  |
| BG244243  | Ndufs8,TYKY,BC021616,MGC37950,MGC101957                 | 0.00024  | -1.72601  |
| BC013503  | Ndufs7,1010001M04Rik                                    | 0        | -3.22499  |
| C88200    | Ndufs6,IP13,BC059730,MGC107676                          | 3.06E-37 | -3.4543   |

|           |                                                     |          |           |
|-----------|-----------------------------------------------------|----------|-----------|
| NM_134104 | Ndufs5,NADH dehydrogenase Fe-S protein 5 pseudogene | 0        | -2.29625  |
| BM898749  | Ndufs4,C1-18k                                       | 0        | -5.91222  |
| BC027270  | Ndufs3,0610010M09Rik                                | 8.38E-40 | -3.10495  |
| BC016097  | Ndufs2,AL033311,MGC27667                            | 0        | -2.24042  |
| BC006660  | Ndufs1,MGC7850,MGC19199,5830412M15Rik,9930026A05Rik | 0        | -3.2602   |
| AK008502  | Ndufc2,G1,R75094,1810004I06Rik,2010300P09Rik        | 2.58E-10 | -1.58403  |
| NM_025523 | Ndufc1,KFYI,MGC106656,2310016K22Rik                 | 0        | -3.32636  |
| W29413    | Ndufb9,1190008J14Rik                                | 5.61E-44 | -2.66175  |
| NM_026061 | Ndufb8,AI987932,2900010I05Rik                       | 0        | -3.374    |
| NM_025843 | Ndufb7,1110002H15Rik                                | 1.41E-12 | -1.82951  |
| C78790    | Ndufb6,Gm137                                        | 0        | -2.44795  |
| BC025155  | Ndufb5,SGDH,AU015782,0610007D05Rik                  | 1.60E-26 | -2.44609  |
| BG968046  | Ndufb4,0610006N12Rik,1300010H20Rik                  | 8.00E-23 | -2.51085  |
| NM_025597 | Ndufb3,AI415450,2700033I16Rik                       | 2.98E-42 | -2.46409  |
| AA940525  | Ndufb2,8kDa,AGGG,AI325567,1810011O01Rik             | 2.10E-08 | -2.37948  |
| BC027265  | Ndufb11,Np15,NP15.6,D5Bwg0566e,D5Bwg0577e           | 3.29E-11 | -2.02118  |
| BI905689  | Ndufb10,PDSW,22kDa,0610011B04Rik                    | 0        | -3.45519  |
| BC018422  | Ndufaf1,CIA30,CGI-65,2410001M24Rik                  | 0        | -3.26959  |
| AV221509  | Ndufab1,8kDa,SDAP,2210401F17Rik,                    | 0.00007  | -2.26927  |
| NM_025358 | Ndufa9,1010001N11Rik                                | 0        | -2.5097   |
| BC012416  | Ndufa8,AW261656,0610033L03Rik                       | 0        | -2.95712  |
| C88880    | Ndufa7,14.5kDa,2400007M02Rik                        | 1.15E-14 | -1.82155  |
| NM_025987 | Ndufa6,14kDa,2700038D15Rik,B230217P19Rik            | 0        | -2.64855  |
| NM_026614 | Ndufa5,2900002J19Rik                                | 5.87E-23 | -2.31095  |
| BC011114  | Ndufa4,MLRQ                                         | 3.52E-07 | -2.21472  |
| AV048277  | Ndufa3,1010001M12Rik,1700022J01Rik                  | 5.88E-08 | -2.20689  |
| NM_010885 | Ndufa2,B8,C1-B8,AV000592                            | 2.00E-16 | -1.8358   |
| AI429575  | Ndufa13,CDA016,CGI-39,Grim19,GRIM-19,               | 0        | -1.90379  |
| AV124207  | Ndufa12,MGC7999,AW112974,MGC107642,2410011G03Rik    | 7.70E-12 | -2.12788  |
| AA596846  | Ndufa11,B14.7,AV006275,11,14.7kDa,2010012C24Rik     | 6.27E-32 | -2.72004  |
| NM_024197 | Ndufa10,2900053E13Rik                               | 4.12E-29 | -2.29284  |
| NM_019443 | Ndufa1,MWFE,1810049F12Rik                           | 3.11E-16 | -1.7678   |
| NM_013864 | Ndr2,Ndr2,SYLD,AI182517,AU040374                    | 9.44E-24 | -5.31547  |
| BB522483  | Ndn,Peg6,AI528698                                   | 3.88E-07 | -2.83634  |
| AI647775  | Ndg2,AI267078,1620401E04Rik                         | 8.77E-10 | -6.68462  |
| NM_010875 | Ncam1,CD56,Ncam,E-NCAM,                             | 0.00043  | -2.52383  |
| NM_013752 | Nbn,Nbs1                                            | 3.95E-07 | -1.93437  |
| AV275156  | Narg1,mNAT1,Tbdn-1,MGC29428,                        | 3.84E-18 | -1.67724  |
| NM_026238 | Narf1,PRN,AI504405,9030612I22Rik                    | 3.37E-08 | -2.56656  |
| BI452475  | Narf,4430402O11Rik                                  | 0.00062  | -3.75166  |
| BI452475  | Narf,4430402O11Rik                                  | 1.02E-08 | -4.93712  |
| BM212838  | Mybn,AI853556,KIAA4170,mKIAA4170,9830112J03,        | 2.60E-14 | -4.04882  |
| BB216883  | Myoz1,FATZ,Myoz,AV090278,2310001N11Rik              | 2.80E-44 | -70.03686 |
| NM_021484 | Myot,Ttid,5530402I04Rik                             | 9.42E-26 | -2.53385  |
| AV241307  | Myom2,AW146149                                      | 3.87E-12 | -1.6585   |
| NM_010867 | Myom1,D430047A17Rik                                 | 4.11E-13 | -2.12341  |
| AW125804  | Myoc,TIGR,GLC1A,AI957332                            | 0        | -13.51003 |
| AB026497  | Myo18a,MyoPDZ,MysPDZ                                | 0.00044  | -1.57053  |
| BC019408  | Mylk2,BB138278,9830004H17Rik                        | 1.19E-09 | -38.304   |
| NM_021611 | Mylic2p,PLRLC,PLRLC-A,PLRLC-B,PLRLC-C,1700027I08Rik | 0.00043  | -1.63491  |
| AK002312  | Myl3,Myic,VLC1,MLC1s,MLC1v                          | 1.81E-11 | -11.24529 |
| NM_010861 | Myl2,MLC-2,Mlc2v,Myipc,MLC-2v                       | 0.00046  | -2.34111  |
| BG794681  | Myh8,Myhsp,Myhs-p,MyHC-pn,AI327267                  | 0.00001  | -23.09808 |
| AJ278733  | Myh4,MHC2B,Myhsf,AI506973,MyHC-IIb                  | 4.04E-07 | -12.20394 |
| AJ002522  | Myh1,Ild,MdMs,Ild/x,Myhs-f,Myhsf2,                  | 0.00017  | -1.63585  |
| NM_008657 | Myf6,MRF4,herculin                                  | 3.07E-09 | -1.66445  |
| AI326984  | Mybpc2                                              | 1.47E-16 | -18.7439  |
| AW228043  | Mybbp1a,P160,p67MBP,p160MBP,AL024407,AU019902       | 6.92E-07 | -1.77062  |
| BB825697  | Mxi1,Mad2                                           | 0        | -2.26545  |
| NM_008650 | Mut,D230010K02Rik                                   | 1.51E-09 | -3.50587  |
| AF425647  | Mus81,AI182501,AW045863,1200008A18Rik               | 0.0007   | -2.134    |
| BF322785  | Mup5                                                | 1.43E-06 | -3.99898  |
| M16359    | Mup3,MUP15,Mup-3,MUP III,MGC117854                  | 0.00047  | -10.00718 |
| NM_031188 | Mup1,Up-1,Ltn-1,Mup-1,Mup-a,Lvtn-1,2610016E04Rik    | 6.08E-08 | -23.37976 |
| NM_010739 | Muc13,Lrrp,Ly64,NJ-1,14/A10,114/A10,AI159736        | 5.83E-10 | -5.06847  |
| BB747681  | Mtus1,MD44,Atip1,MTSG1,C85752,ATBP135,AI481402      | 1.19E-14 | -2.67015  |



|           |                                                            |          |          |
|-----------|------------------------------------------------------------|----------|----------|
| NM_026658 | Mto1,2310039H01Rik,5730419A02Rik                           | 0.00023  | -1.89701 |
| BB381813  | Mtmr1,AW049210,AW548191                                    | 1.38E-21 | -1.78758 |
| NM_019926 | Mtm1,Mtm,AF073996,KIAA4176,mKIAA4176                       | 1.19E-07 | -2.15733 |
| NM_133767 | Mtif2,IF-2mt,2310038D14Rik,2410112O06Rik                   | 2.33E-16 | -1.89624 |
| NM_138745 | Mthfd1,DCS,Mthfd,NEUT2,E430024A07Rik                       | 1.49E-15 | -2.18524 |
| BB359043  | Mterfd3,1700007D05Rik                                      | 1.09E-32 | -3.39304 |
| AV083741  | Mtdh,3D3,Lyric,AV353288,3D3/Lyric,D8Bwg1112e,2610103J23Rik | 0.00002  | -1.68847 |
| AV067008  | Mtch2,HSPC032,2310034D24Rik,4930539J07Rik                  | 5.90E-10 | -1.61992 |
| AV272180  | Mtap1a,Map1a,Mtap1,moth1,Mtap-1,AI853608,6330416M19Rik     | 5.81E-30 | -3.28439 |
| AV286522  | MsrB3,MsrB2,D430026P16Rik                                  | 2.49E-19 | -2.31758 |
| BC021619  | MsrB2,Mrsb,MsrB,Pilb,2310050L06Rik                         | 1.65E-25 | -4.20013 |
| NM_026322 | MsrA,MSR-A,MGC101976,2310045J23Rik,6530413P12Rik           | 6.04E-28 | -3.31415 |
| M80360    | Msh3,Rep3,Rep-3,D13Em1                                     | 0.00068  | -2.70938 |
| BB539042  | Msc,MyoR                                                   | 1.13E-12 | -5.66943 |
| AV093466  | Mrrf,RRF,MRFF,MTRRF,2400002D02Rik                          | 3.29E-14 | -1.92556 |
| BC022587  | Mrps9,mg637,AW322516,2310002A08Rik                         | 7.56E-11 | -1.54812 |
| AV035110  | Mrps6,AW046321                                             | 4.54E-25 | -1.63699 |
| BE627004  | Mrps36,1110018B13Rik                                       | 0        | -5.71111 |
| AV304074  | Mrps35,MDSO23,MRPS28,MRP-S28,MGC28446                      | 1.48E-10 | -2.2235  |
| NM_023260 | Mrps34,Tce2,AV001970,0610007F04Rik,5330430D13Rik           | 2.67E-07 | -2.16315 |
| Y17852    | Mrps33,Gdap3,PTD003,CGI-139,MRP-S33,AI841153,MGC106490     | 3.44E-14 | -1.66219 |
| NM_020560 | Mrps31,AA960481,Imogen38,Imogen44,1500002D03Rik            | 1.96E-22 | -2.09447 |
| AV095945  | Mrps30,PAP,Pdcd9,AA968347,2610020A16Rik                    | 1.34E-06 | -1.98965 |
| AK011036  | Mrps28,AW061224,1500012D08Rik                              | 0        | -3.26698 |
| AI648866  | Mrps26,GI008,Rpms13,MRP-S13,MRP-S26,AI648866               | 1.63E-11 | -1.88547 |
| BG074954  | Mrps25,Rpms25,2810429N01Rik                                | 0.00054  | -2.00716 |
| BF167852  | Mrps24,Rpms24,AI414579,3110030K20Rik                       | 1.66E-18 | -2.28274 |
| NM_024174 | Mrps23,Rpms23,D11Bwg1153e,2310047I09Rik                    | 0.00002  | -1.92511 |
| NM_025485 | Mrps22,Rpms22,3100002P07Rik                                | 1.98E-06 | -1.58289 |
| NM_078479 | Mrps21,1810031B19Rik                                       | 8.58E-27 | -2.86232 |
| AK004139  | Mrps18c,1110037D14Rik                                      | 4.09E-11 | -1.60037 |
| NM_026768 | Mrps18a,C79712,MGC66832,1110004O20Rik                      | 1.51E-06 | -2.4298  |
| AK003008  | Mrps17,Mprs17,1810006P02Rik                                | 7.24E-16 | -1.51177 |
| NM_025440 | Mrps16,Mprs16,1500011E11Rik                                | 3.47E-09 | -2.18978 |
| BB314055  | Mrps15,Mprs15,1500003E24Rik,2410002B11Rik                  | 3.44E-19 | -2.08029 |
| BI246587  | Mrps14,Rpms14,AL022847,1810032L21Rik                       | 8.36E-08 | -1.90549 |
| NM_011885 | Mrps12,rps12,Rpms12,AI327385                               | 0.00016  | -1.73929 |
| BB315668  | Mrpl9,L9mt,AA409733,8030480E20Rik,C330013D18Rik            | 0.00052  | -1.76173 |
| BM209870  | Mrpl55,2810038N09Rik                                       | 4.04E-07 | -2.09237 |
| NM_025317 | Mrpl54,D10Sut1e,0610008M19Rik                              | 0.00002  | -2.34582 |
| BC022162  | Mrpl53,1110007K17Rik                                       | 2.27E-20 | -1.57158 |
| AI594880  | Mrpl51,CDA09,Mrp64,HSPC241,2610511M02Rik                   | 0        | -1.95925 |
| BC021318  | Mrpl50,AA408971,AI317351,D4Wsu125e                         | 1.74E-10 | -1.62561 |
| BB540526  | Mrpl48,CGI-118,D4ErtD786e,1810030E20Rik,2610028L11Rik      | 0.00002  | -1.74124 |
| AK009257  | Mrpl47,NCM1,CGI-204,MTF/L47,4833424P18Rik                  | 3.92E-08 | -2.23223 |
| NM_023331 | Mrpl46,C80107,LIECG2,P2ECSL,C15orf4,3110052F15Rik          | 2.31E-10 | -2.11597 |
| C79823    | Mrpl45,R75241,AU043542,2600005P05Rik                       | 0.00007  | -1.80968 |
| AK007652  | Mrpl44,AI463302,1810030E18Rik,5730593H20Rik                | 7.85E-06 | -1.59721 |
| BI135190  | Mrpl38,Rpml3,MRP-L3,R75240,                                | 4.67E-06 | -2.88409 |
| BC011065  | Mrpl37,Rpml2,MRP-L2,AI132596,2300004O14Rik                 | 0.00058  | -1.92498 |
| AB049655  | Mrpl36,AI646041                                            | 5.27E-15 | -1.92135 |
| BF787384  | Mrpl35,1110066C01Rik                                       | 8.23E-31 | -2.01204 |
| AF279255  | Mrpl32,0610033O15Rik                                       | 2.97E-14 | -1.75671 |
| BC004614  | Mrpl30,Rpml28,MRP-L28,2310001L22Rik                        | 1.47E-19 | -2.05572 |
| NM_024227 | Mrpl28,p15,MAAT1,MGC8184,1110015G04Rik                     | 8.92E-09 | -1.96905 |
| NM_053161 | Mrpl27,D11Moh47,A630055F16Rik                              | 3.39E-16 | -1.80828 |
| NM_011288 | Mrpl23,Rpl23,L23mrp,Rpl23l                                 | 1.91E-36 | -2.20497 |
| NM_025302 | Mrpl2,CGI-22,Rpml14,MRP-L14                                | 2.55E-08 | -2.90858 |
| BB041267  | Mrpl19,RLX1,Rpml15,                                        | 3.96E-12 | -1.59073 |
| NM_026310 | Mrpl18,C79879,HSPC071,MRP-L18,1010001C05Rik                | 3.24E-22 | -2.46179 |
| AK004034  | Mrpl16,2310039D06Rik                                       | 1.16E-12 | -2.0126  |
| BI791064  | Mrpl15,Rpml7,MRP-L7,HSPC145                                | 3.89E-19 | -2.5028  |
| BC027021  | Mrpl14,Rpml32,MRP-L32,AI846816,1110006I11Rik               | 0.00003  | -2.74164 |
| AB049641  | Mrpl13,1110002D09Rik                                       | 6.81E-14 | -1.72864 |
| AK002757  | Mrpl12,Rpml12,MRP-L12,0610034O11Rik,1500031N16Rik          | 1.63E-10 | -1.78473 |
| NM_025553 | Mrpl11,2410001P07Rik                                       | 1.38E-13 | -1.86507 |

|           |                                                         |          |           |
|-----------|---------------------------------------------------------|----------|-----------|
| AK010343  | Mrpl1,AI462572,2410002L03Rik,5830418D04Rik              | 1.74E-22 | -2.66271  |
| AY079153  | Mrap,Falp,ORF61,1110025G12Rik                           | 0.00021  | -17.71819 |
| AI385618  | Mpz,P0,Mpp,P>0<,P-zero,P>zero<                          | 0.00027  | -45.15576 |
| NM_138670 | Mpst,Mst                                                | 0.00002  | -4.71525  |
| AF199010  | Mpp6,P55t,Pals2                                         | 9.95E-11 | -2.63978  |
| NM_007863 | Mpp3,Dlgh3,6430514B01                                   | 0        | -7.20058  |
| AK019164  | Mpdz,MUPP1,AI225843,B930003D11Rik                       | 2.90E-10 | -2.19584  |
| BC018329  | Mospd1,MGC103065,1810018L05Rik                          | 2.67E-21 | -1.58554  |
| NM_133684 | Mosc2,2810484M10Rik                                     | 2.66E-10 | -1.89005  |
| BF319573  | Mopt,MGC107136                                          | 3.82E-07 | -1.79376  |
| AK006387  | Mod1,Mdh-1,Mod-1,MGC91072,D9ErtD267e                    | 1.60E-30 | -4.89163  |
| AI839848  | Mobp,MOBP69,MOBP73,MOBP81                               | 1.24E-04 | -2.55593  |
| BB234631  | Mn1,AA003644,AA009236                                   | 1.53E-12 | -6.13612  |
| BB035005  | Mmrm1,Mmrm,Emilin4,4921530G03Rik                        | 0.00045  | -2.43271  |
| AV174022  | Mme,NEP,CD10,CALLA,C85356,6030454K05Rik                 | 4.39E-28 | -14.71628 |
| BC021914  | Mmd,AA690185,1200017E07Rik,1810073C06Rik                | 0.00008  | -1.68347  |
| BB772682  | Mmab,ATR,9130222L19Rik                                  | 4.60E-07 | -4.90939  |
| NM_019966 | Mlycd,Mcd,AI324784                                      | 0.00019  | -4.05075  |
| AF245479  | Mlxip1,ChREBP,WS-bHLH,Wbscr14                           | 8.68E-39 | -27.70056 |
| AF265663  | Mlxip,Mir,Mondoa,AW228700,mKIAA0867,B930074I24          | 9.78E-11 | -2.04159  |
| AK008707  | Mllt3,Af9,D4ErtD321e,                                   | 1.22E-06 | -1.80296  |
| AF100171  | Mlf1,HLS7                                               | 0        | -38.99574 |
| BI134671  | Mkrm2,C81377,2610002L04Rik                              | 5.80E-12 | -2.76617  |
| NM_021461 | Mknk1,Mnk1,2410048M24Rik                                | 4.33E-06 | -1.68849  |
| BF581250  | Mkks,Bbs6,AI463362,AI957237,1300013E18Rik               | 0        | -4.63191  |
| BM227771  | Mipol1,D12ErtD19e,1700081O04Rik,6030439O22Rik           | 2.80E-22 | -1.61772  |
| AK017491  | Mipep,5730405E07Rik                                     | 7.00E-07 | -2.07337  |
| AK013451  | Mina,AI449204,1810047J07Rik,2410057H13Rik,3830408E23Rik | 0.00002  | -1.63433  |
| BI150149  | Mgst1,Gst,1500002K10Rik                                 | 1.03E-09 | -1.96252  |
| BI411560  | Mgll,Mgl,AA589436                                       | 0.00064  | -1.80469  |
| NM_010796 | Mgl1,Mgl                                                | 0.00023  | -9.51935  |
| BB703735  | Mgea6,MEA6,Mgea,MGC30562,D12Bwg0579e                    | 1.55E-12 | -1.85618  |
| BC011344  | MGC5739                                                 | 0.00027  | -2.32592  |
| BC019171  | Mfsd3,2310010G13Rik                                     | 1.64E-13 | -3.82283  |
| NM_133201 | Mfn2,Fzo,D630023P19Rik                                  | 1.04E-30 | -3.90704  |
| C79511    | Mfn1,HR2,KIAA4032                                       | 5.73E-30 | -3.47344  |
| AK013063  | Mettl5,2810410A08Rik                                    | 1.28E-09 | -1.91535  |
| BG060788  | Met,HGF,HGFR,Par4,c-Met                                 | 9.81E-08 | -2.10792  |
| BC002076  | Meox2,Gax,Mox2,Mox-2,AI528662                           | 0.00039  | -2.54782  |
| AV000569  | Mel13                                                   | 2.17E-21 | -3.66063  |
| AV334508  | Mef2d,C80750,MGC31718                                   | 0.00028  | -1.57004  |
| NM_025297 | Mecr,Nrbf1,AI195831                                     | 0.00005  | -2.7657   |
| AK006146  | Me3,MGC107389,1700020C08Rik,B230207H15Rik               | 0        | -5.81884  |
| AV016940  | Mdh2,MDH,Mor1,Mdh-2,Mor-1                               | 0        | -2.15674  |
| NM_008618 | Mdh1,MDHA,Mor2,MDH-s,Mor-2,D17921,B230377B03Rik         | 3.13E-16 | -1.83203  |
| AI427762  | Mcrs1,P78,MSP58,C78274,ICP22BP,MGC103140,MGC117915      | 0        | -4.94865  |
| NM_134160 | Mcoln3,Va,MGC124245,MGC124246,6720490O21Rik             | 0.0004   | -3.72826  |
| AA960125  | Mcee,1110007A04Rik                                      | 1.81E-29 | -3.50455  |
| BI155184  | Mccc2,MCCB,4930552N12Rik                                | 0.00027  | -3.19645  |
| NM_023644 | Mccc1,Mcca,R75106,MCCalpha,1810045E08Rik,2310058B18Rik  | 9.64E-10 | -3.03562  |
| AW212577  | Mcart1,Gm138,MGC115765,D130005A03Rik                    | 6.15E-11 | -1.73952  |
| NM_010777 | Mbp,mld,shi,Hmbpr,C76307,R75289,golli-mpb               | 1.16E-24 | -5.01998  |
| BM207891  | Mbnl2,MBLL,R75232,                                      | 1.31E-14 | -3.1777   |
| NM_020007 | Mbnl1,Mbnl,mKIAA0428                                    | 3.63E-10 | -1.62182  |
| NM_134017 | Mat2b,TGR,MAT-II,                                       | 1.64E-06 | -1.8457   |
| BB488978  | Mat2a,MGC6545,D630045P18Rik                             | 0.00003  | -1.52451  |
| AI642422  | Mast4,AI642422,mKIAA0303,4930420O11Rik                  | 0.00016  | -1.86191  |
| AV028487  | Mas1,Mas-1                                              | 2.19E-06 | -3.592    |
| BM211104  | Mars,MTRNS,MetRS,MGC90747                               | 0.00012  | -1.52201  |
| NM_010766 | Marco,Ly112,Scara2,AI323439                             | 0.00002  | -3.4894   |
| BQ176049  | March6,mKIAA0597,3830408G03,F830029L24Rik               | 0        | -2.31543  |
| AK009364  | March5,Rnf153,MARCH-V,                                  | 8.77E-13 | -1.6117   |
| BC002144  | March2,MGC7259,9530046H09Rik                            | 4.16E-08 | -2.25527  |
| BC027056  | Mapre2,EB1,EB2,RP1,AI314113,D18Abb1e,C820009F03Rik      | 0.00009  | -1.52386  |
| BQ174980  | Mapkbp1,Jnkbp1,AW123212,mKIAA0596,2810483F24Rik         | 0.00003  | -2.69662  |
| NM_010765 | Mapkapk5,MK5,PRAK                                       | 1.16E-06 | -1.72523  |

|           |                                                            |          |           |
|-----------|------------------------------------------------------------|----------|-----------|
| AW909414  | Mapk8,JNK,JNK1,Prkm8,SAPK1,AI849689                        | 0.00003  | -2.0731   |
| AK009250  | Mapk1ip1,MISS,AU043776,2310009E07Rik                       | 1.67E-14 | -4.38527  |
| BC012235  | Mapk14,p38,Crk1                                            | 1.72E-23 | -2.03853  |
| BC021640  | Mapk12,Erk6,Sapk3,Prkm12,AW123708,P38gamma                 | 1.05E-18 | -4.87193  |
| NM_031248 | Mapbpip,P14,Rab25,AL022628,2010111E04Rik                   | 0.00001  | -1.62405  |
| BB667222  | Map4k2,GCK,BL44,Rab8ip,AI385662                            | 0.00085  | -2.51786  |
| BB370469  | Map3k12,DLK,MUK,Zpk                                        | 4.93E-24 | -1.57721  |
| BB540608  | Map2k6,MEK6,MKK6,Prkmk6,SAPKK3                             | 0.00072  | -4.19629  |
| AI481780  | Map2k3,MEK3,MKK3,Prkmk3,mMKK3b,AW212142                    | 3.29E-10 | -2.43698  |
| BB549292  | Maob,6330414K01Rik                                         | 1.06E-22 | -6.48609  |
| AK013287  | Mak3,Mak3p,AW112078,2600005K24Rik,2810441M03Rik            | 4.53E-31 | -1.72671  |
| NM_025571 | Magmas,CGI-136,AV006767,2010110I09Rik                      | 8.43E-20 | -1.9979   |
| AV352375  | Maf,c-maf,AW047063,2810401A20Rik,A230108G15Rik             | 3.48E-08 | -3.32509  |
| AV284857  | Maf                                                        | 0        | -4.89763  |
| AK011037  | Mad2l1bp,CMT2A,CMT2B,                                      | 0.00024  | -1.95015  |
| BC013536  | Lypla1,Pla1a                                               | 4.14E-11 | -1.63015  |
| BI693511  | Luc7l2,Cgi74,CGI-59,CGI-74,AA522013,AU015269,4930471C18Rik | 8.36E-13 | -1.67925  |
| BE949068  | Lsm6,AI747288,MGC117708,1500031N17Rik,2410088K19Rik        | 5.12E-10 | -1.97412  |
| NM_008515 | Lrrfip1,Fliiap1,AU024550                                   | 5.65E-08 | -2.63541  |
| BC019794  | Lrrc3b,LRP15,BC019794,MGC30505                             | 1.21E-22 | -2.21388  |
| AK008119  | Lrrc39,2010005E21Rik,9430028I06Rik                         | 0        | -5.46327  |
| BB311440  | Lrrc38,A230053A07Rik                                       | 1.73E-17 | -30.89041 |
| BB143476  | Lrrc20,BC036304,MGC25719                                   | 3.47E-31 | -6.72217  |
| BC004681  | Lrprrc,LSFC,GP130,C76645,Lrp130,3110001K13Rik              | 1.53E-30 | -2.03466  |
| BB075157  | Lrp2bp,MegBP,1700113N17Rik,2310006J04Rik,4930479L12Rik     | 2.79E-08 | -10.6745  |
| BG071205  | Lrig1,Img,LIG-1,D6Bwg0781e                                 | 0.00006  | -4.77431  |
| BB371739  | Lrfn5,AI427653,AI604817,KIAA4208,mKIAA4208,C130061B21      | 4.24E-06 | -4.08465  |
| NM_030695 | Lrba,Lba,C80285,Lab300,D3Erd775e                           | 3.42E-06 | -2.23346  |
| BC003305  | Lpl                                                        | 6.97E-22 | -5.33972  |
| NM_015763 | Lpin1,flid,Kiaa0188,mKIAA0188,4631420P06                   | 3.44E-12 | -6.34643  |
| BM240205  | LOC548102                                                  | 0.00078  | -1.8066   |
| BG064696  | LOC545365                                                  | 0.00014  | -1.83464  |
| BQ174579  | LOC545085                                                  | 1.38E-06 | -3.16493  |
| BB229114  | LOC544932                                                  | 0.00001  | -4.6208   |
| BB317953  | LOC434076                                                  | 3.58E-08 | -2.62103  |
| BB411302  | LOC433594                                                  | 9.36E-09 | -1.97874  |
| BB609792  | LOC433237                                                  | 4.34E-09 | -7.7533   |
| BB327336  | LOC433231                                                  | 1.91E-14 | -5.16911  |
| BB477614  | LOC432989                                                  | 0        | -47.00805 |
| AV307961  | LOC380843                                                  | 1.13E-20 | -1.93995  |
| BM235840  | LOC329575                                                  | 7.22E-11 | -1.74321  |
| BB705689  | LOC244421                                                  | 0.00001  | -2.35217  |
| BE995608  | LOC237403                                                  | 4.93E-18 | -9.46054  |
| NM_010727 | Lnx1,Lnx                                                   | 0.00025  | -2.08375  |
| BM200788  | Lnp,Ul,AI666268,ulnaless,2310011O18Rik,4921514L11Rik       | 0.00004  | -1.88409  |
| BM230794  | Lmtk2,BREK,KPI2,cprk,KPI-2,2900041G10Rik,A330101P12Rik     | 7.02E-10 | -2.66959  |
| BC019124  | Lmcd1,dyxin,AW455500,AW553074,MGC29184                     | 0.00069  | -2.04131  |
| BG070844  | Lmbr1,AU017641                                             | 2.55E-14 | -2.09437  |
| BG065702  | Lin10,MGC6480,BC006874,D230025D16Rik                       | 3.67E-06 | -1.83835  |
| BC010816  | Lims2,PINCH2                                               | 0.00064  | -7.47666  |
| C77512    | Lias,mLip1,C77512,MGC7254,2900022L22Rik,4933425M12Rik      | 7.91E-18 | -1.76072  |
| BC025036  | Lgtn,D1Erd5e                                               | 8.72E-12 | -2.54172  |
| BI107632  | Lgr4,Gpr48,9130225G07,A930009A08Rik                        | 0.00008  | -1.83553  |
| BM118120  | Lgi2,mKIAA1916                                             | 3.14E-06 | -3.0203   |
| AF244979  | Lgals12,Grip1,AW987437                                     | 0.00042  | -12.71685 |
| BG060855  | Letm1                                                      | 6.39E-24 | -1.86948  |
| U18812    | Lep,ob,obese                                               | 0.00002  | -27.48052 |
| BC006806  | Lenep,Lep503,AU018355                                      | 0.00033  | -2.1274   |
| AW105779  | Ldhd,D8Bwg1320e,4733401P21Rik                              | 1.16E-06 | -6.51097  |
| AV216324  | Ldh2,Ldhd,Ldh-2,AI790582                                   | 0        | -8.39768  |
| NM_010699 | Ldh1,Ldha,LDH-A,Ldh-1                                      | 9.94E-38 | -2.03974  |
| NM_011918 | Ldb3,ZASP,PDLIM6,AW742271,cypher 1,cypher 2,MGC118603      | 3.72E-13 | -4.82254  |
| NM_025304 | Lcmt1,Lcmt,AL033290,MGC11807                               | 2.14E-10 | -1.68588  |
| AA867167  | Lck,Hck-3,p56<lck>                                         | 0.00069  | -6.01775  |
| BB248430  | Lbx1,Lbx1h                                                 | 9.60E-06 | -4.48683  |
| NM_133815 | Lbr,ic,AI505894                                            | 8.52E-06 | -1.58479  |

|           |                                                             |          |           |
|-----------|-------------------------------------------------------------|----------|-----------|
| NM_138647 | Lass1,Uog-1                                                 | 4.68E-07 | -8.49264  |
| BB773089  | Lars2,LEURS,AI035546,Kiaa0028                               | 7.04E-07 | -2.11213  |
| NM_133892 | Lao1,AW990848                                               | 6.18E-07 | -4.32026  |
| BC026051  | Lamb2,Lams,Lamb-2,AW211941                                  | 3.37E-06 | -1.86083  |
| BE691552  | Lactb2,Cgi-83,MGC7674,E430032H21Rik                         | 2.67E-07 | -2.31964  |
| NM_030717 | Lactb,Lact1,LACT-1,Mrpl56                                   | 0.00029  | -1.6271   |
| AF397909  | Lace1,CG8520,MGC107616                                      | 7.88E-15 | -2.51715  |
| BC016226  | L2hgdh,BC016226,MGC28775                                    | 1.49E-17 | -5.53628  |
| BB126077  | Ky,ky,CD1,D9Mgc44e                                          | 2.51E-18 | -25.64533 |
| BF162017  | Ktn1                                                        | 0        | -2.02436  |
| NM_029571 | Kti12,AI326810,AU014758,1110001A12Rik                       | 4.85E-26 | -2.53937  |
| BB522422  | Ksr,hb,RSU2,B-KSR1,AW492498,D11Bhm183e,D11Bhm184e           | 1.06E-10 | -2.47427  |
| AF345295  | Krtap16-5,A030006N06Rik                                     | 0.00003  | -5.01648  |
| AV082644  | Krt2-4,Krt-2.4,AW108092                                     | 2.72E-16 | -8.49578  |
| AF312018  | Krt2-19,AA589625                                            | 0.00005  | -2.04885  |
| BM213828  | Kpna3,IPOA4                                                 | 1.79E-24 | -2.39816  |
| U20619    | Kpna1,NP11,Rch2,IPOA5,mSRP1,AW494490                        | 0        | -2.81072  |
| NM_010653 | Klrc2,NGK2C                                                 | 1.99E-09 | -6.06743  |
| U49865    | Klra3,5E6,Nk2,Nk-2,Ly49c,Nk2.1,NK-2.1,MGC123910             | 0.00066  | -7.56639  |
| BB231989  | Klk6,Kal,Klk1,mGk-6,Klk1b6,0610007D04Rik                    | 1.96E-25 | -7.79325  |
| BM942651  | Klhl8,MGC102224,D5Ert431e,2310001P09Rik                     | 3.36E-08 | -4.4294   |
| AK012326  | Klhl7,Klhl6,SBB126,D5Ert363e,2700038B03Rik                  | 1.01E-23 | -2.3911   |
| AK004187  | Klhl24,C85082,1110046J11Rik,4930429H24Rik,6530402O20Rik     | 1.03E-18 | -2.12181  |
| AW548377  | Klhl23,C130068N17Rik                                        | 0.00001  | -3.66474  |
| AK007786  | Klhl21,mKIAA0469,D330008A20,1810045K06Rik                   | 0.00015  | -2.91274  |
| BB229004  | Klhdc3,Peas,1300011D16Rik                                   | 0        | -2.70553  |
| BC005581  | Klhdc2,LCP,HCLP-1,D12Ert522e,2310022K15Rik                  | 6.56E-11 | -1.5775   |
| BQ176961  | Klhdc1                                                      | 0        | -6.2775   |
| NM_008452 | Klf2,Lklf                                                   | 6.03E-08 | -2.04055  |
| BC013486  | Klf15,CKLF,KKLF,AV048136,AW494632,1810013I09Rik             | 1.15E-08 | -34.76517 |
| BB753447  | Klf12,AP-2rep,AI225908,AI315654,2700063E05Rik,B130052C06Rik | 0.00003  | -3.02625  |
| BB528534  | Kirrel3,SST4,NEPH2                                          | 1.34E-07 | -5.69748  |
| NM_016705 | Kif21a,AI850764,mKIAA1708                                   | 2.73E-28 | -2.53403  |
| BQ174514  | Kif1c,Ltxs1,D11Bwg1349e,B430105J22Rik                       | 3.50E-07 | -2.51035  |
| AV104668  | Kif1b,D4Mil1e,AI448212                                      | 1.13E-20 | -2.53124  |
| BG066903  | Kif16b,C80253,C80902,AA623607,mKIAA1590,8430434E15Rik       | 4.54E-09 | -3.76465  |
| NM_008438 | Kera,CNA2,SLRR2B                                            | 0.00003  | -36.83734 |
| AW764104  | Keap1,INRF2,mKIAA0132                                       | 0.00094  | -1.59757  |
| BB252670  | Kctd7,4932409E18,9430010P06Rik                              | 0.00081  | -1.74133  |
| BB091366  | Kctd15,BC031749,MGC25497                                    | 2.57E-06 | -1.84353  |
| BB461843  | Kcnq5,D1Mgi1,AA589396,7730402H11,9230107O05Rik              | 0.0009   | -2.55464  |
| NM_080465 | Kcnn2,SK2,SKCA2                                             | 0.00006  | -8.73925  |
| BB479183  | Kcnma1,Slo,Slo1,mSlo,MaxiK,mSlo1                            | 0.00082  | -2.44219  |
| BB099233  | Kcnk7,Knot,Mlk3,Kcnk6,Kcnk8,MGC129259,2310014G03Rik         | 0.00004  | -2.18351  |
| BG069378  | Kcnc3,Elk2,Melk2,AU019351,C030044P22Rik                     | 0.00069  | -2.3142   |
| AK015001  | Kcng4,KV6.3,KV6.4,AW049024,4921535I01Rik                    | 1.29E-19 | -9.12775  |
| NM_145922 | Kcnc4                                                       | 4.50E-04 | -1.56198  |
| BB130746  | Kcnc1,KV4,NGK2,Shaw,Kv3.1,Kcr2-1,KSHIIB,C230009H10Rik       | 5.99E-06 | -16.89766 |
| AF033003  | Kcnab1,Akr8a8,Kvbeta1.1,mKv(beta)1                          | 2.49E-08 | -21.1559  |
| NM_010596 | Kcna7,Kv1.7                                                 | 7.30E-23 | -8.34869  |
| BQ175978  | Kcna1,MBK1,Mk-1,Shak,Kv1.1,mceph,Kca1-1,AI840627            | 3.30E-10 | -10.56051 |
| BG071725  | Kcmf1,Pmcf,Debt91,1700094M07Rik                             | 1.48E-24 | -1.53295  |
| AK003597  | Kbtbd7,Gm295,AU045792,1110008P08Rik                         | 0.00032  | -1.51697  |
| W78395    | Kbtbd5,2310024D23Rik                                        | 0.00007  | -2.01428  |
| BB264869  | Kbtbd3,Bklhd3,2200003A07Rik                                 | 0.00025  | -2.39933  |
| BC026972  | Jtv1,AA407136,AA407225,MGC30261,                            | 0        | -5.37332  |
| BC008139  | Jtb,Gm622                                                   | 1.88E-21 | -1.58486  |
| BB432934  | Jph1,Jp1,JP-1                                               | 0        | -4.15543  |
| BG066575  | Jarid2,Jmj,C79929,C79931,AI317256,AU045941                  | 0.00012  | -1.83549  |
| AV221988  | Jvd,AI463340,1300016K07Rik,6720455E18Rik                    | 1.13E-14 | -2.75564  |
| AV239969  | Itih5,E130106B02,5430408M01Rik                              | 6.73E-07 | -2.79514  |
| AK009352  | Itgb1bp3,Mibp,2310015C21Rik                                 | 2.16E-06 | -4.00704  |
| AK003906  | Itgb1bp2,Chordc3                                            | 2.41E-08 | -2.52352  |
| NM_008403 | Itgb1bp1,AI449260,AU019480                                  | 4.01E-11 | -1.86201  |
| AK010892  | Isoc1,2610034N03Rik                                         | 0.00002  | -2.10581  |
| BB345784  | Irs1,IRS-1                                                  | 2.46E-13 | -2.35827  |

|           |                                                           |          |           |
|-----------|-----------------------------------------------------------|----------|-----------|
| AW492241  | lqsec2,KIAA0522,mKIAA0522                                 | 0.00042  | -3.91369  |
| BG065062  | lqcc,BC026978,MGC28034                                    | 0.00068  | -1.90159  |
| BB475675  | lpo13,Imp13,Kap13,Ranbp13,MGC18698                        | 1.56E-06 | -3.84359  |
| NM_009349 | lnmt,Temt                                                 | 0.00079  | -14.30747 |
| BF780381  | lmmt,HMP,P87,P89,P87/89,1700082C19Rik                     | 0        | -2.61503  |
| NM_053122 | lmp2l,IMP2,AI853880                                       | 5.69E-36 | -3.63004  |
| BC008259  | lmp1l,AU042386,MGC101970,1500034J20Rik,2610528O17Rik      | 0        | -2.38122  |
| BB809808  | ll17d,ll27a,IL-17D,AI462269                               | 0.00012  | -2.3722   |
| NM_008358 | ll15ra,AA690181                                           | 0.00035  | -2.98987  |
| NM_008357 | ll15,AI503618                                             | 3.82E-16 | -8.60156  |
| BE947079  | ll12rb2,lfnm,IL-12RB2,A930027I18Rik                       | 1.78E-07 | -2.4705   |
| BC004619  | ll11ra1,NR1,GP130,Il11ra,AI314697                         | 7.91E-13 | -2.41141  |
| AI326478  | lgh-6,lgm,muH,lgh6                                        | 7.14E-11 | -6.60192  |
| BG092043  | lgf2bp3,IMP3,IMP-3,                                       | 6.16E-07 | -2.70819  |
| BM068979  | lfrg15,15kDa,C77739,                                      | 1.22E-06 | -2.60577  |
| BF537076  | lfng2,lfng2                                               | 6.77E-09 | -2.99492  |
| AK017110  | lfitm7,Mil4,4933438K12Rik                                 | 0.00028  | -1.9759   |
| AY090098  | lfi27,lsg12,lsg12(b1),2310061N23Rik                       | 3.05E-12 | -6.13182  |
| NM_008323 | ldh3g                                                     | 5.61E-44 | -2.71207  |
| C78231    | ldh3b,C78231                                              | 7.59E-13 | -4.471    |
| AK003393  | ldh3a,AA407078,AI316514,1110003P10Rik,1500012E04Rik       | 0        | -3.65995  |
| NM_008322 | ldh2,IDPm,ldh-2,E430004F23                                | 2.76E-27 | -1.89798  |
| NM_010497 | ldh1,IDPc,ld-1,ldh-1,                                     | 2.41E-06 | -2.21343  |
| AK004972  | lde,AA675336,AI507533,1300012G03Rik,4833415K22Rik         | 0.00007  | -1.65591  |
| NM_026729 | lct1,1110001A02Rik,1110002E03Rik                          | 5.00E-08 | -1.57957  |
| BG066210  | lbrdc3,4930534K13Rik,4930555L03Rik                        | 0.00023  | -6.14708  |
| AW553435  | lars2,C79125,MGC63429,2010002H18Rik                       | 2.10E-08 | -1.65695  |
| BB434117  | lapp,amylin                                               | 0.00055  | -2.92262  |
| AK020653  | ltra3,Prsp,Tasp,2210021K23Rik,9530081K03Rik               | 0.00007  | -2.5944   |
| BB755506  | lspb6,Gm479,Hsp20,AA387366,MGC107687                      | 4.77E-12 | -11.52543 |
| D11089    | lspa9a,mot2,74kDa,GRP75,                                  | 3.57E-17 | -1.65246  |
| BM200015  | hsdl2,2610207I16Rik                                       | 2.03E-14 | -3.26642  |
| BE985436  | hsdl1,2700067E09Rik                                       | 5.61E-11 | -2.22739  |
| BB032410  | hsd17b4,MFE-2,Mfp-2,AW208803,perMFE-2,17[b]-HSD           | 7.42E-22 | -2.19402  |
| AK005016  | hrsp12,HR12,HRP12                                         | 7.42E-06 | -2.30347  |
| NM_010473 | hrc                                                       | 0        | -5.26095  |
| BB404920  | hrasls3,C78643,Hrev107                                    | 2.15E-13 | -2.23969  |
| BQ176967  | hrasls,A-C1,Hrasrs,2810012B06Rik                          | 8.18E-36 | -7.98157  |
| BB779859  | hoxc10,Hox-3.6,AI506621                                   | 1.16E-17 | -3.93876  |
| BB388649  | hoxa5,Hox-1.3                                             | 1.48E-06 | -5.40861  |
| BB463518  | hook1,azh,A930033L17Rik                                   | 5.33E-15 | -4.55619  |
| AB017136  | homer2,CPD,Vesl-2,Cupidin,AW539445                        | 1.87E-17 | -2.83429  |
| NM_011982 | homer1,SYN47,Ves-1                                        | 0.00003  | -4.11502  |
| AK009007  | hod,Hop,Ob1,Obl,Hdop,                                     | 0.0002   | -4.6745   |
| BB380198  | hnrd,Auf1                                                 | 0.00013  | -2.14082  |
| NM_080462 | hnmt,AI788969,1500031F01Rik                               | 2.51E-08 | -6.45625  |
| AV377334  | hnga2-ps1,[y]i-c,Hmgic-ps1,                               | 2.13E-06 | -2.988    |
| BB744589  | hlf,E230015K02Rik                                         | 0.00023  | -2.73248  |
| NM_013820 | hk2,HKII,AI642394                                         | 5.12E-29 | -3.49698  |
| BC010564  | hist2h2aa1,Hist2,H2a-615,AI448581                         | 1.72E-06 | -3.00626  |
| BC019757  | hist1h4i                                                  | 0        | -8.94444  |
| BC028550  | hist1h4h,MGC41466,1700024H08Rik                           | 2.38E-24 | -12.21881 |
| BI990622  | hist1h3i,H3-H                                             | 0.00002  | -7.86368  |
| AK010121  | hist1h3f,Hist1,H3.2-221                                   | 0.00025  | -2.81692  |
| NM_013550 | hist1h3a                                                  | 1.77E-41 | -9.24245  |
| M25487    | hist1h2bp                                                 | 0.00032  | -1.58628  |
| BE688907  | hist1h2be                                                 | 0.00006  | -3.3555   |
| NM_023422 | hist1h2bc,H2bfs,R74621,2610022J01Rik                      | 8.09E-29 | -1.72065  |
| BB533903  | hist1h1c,H1c,H1.2,H1f2,                                   | 0        | -3.0928   |
| NM_025798 | hint3,HINT4,HINT-4,0610010I17Rik                          | 0        | -4.03475  |
| AF356874  | hint2,1190005L05Rik                                       | 1.98E-23 | -2.93232  |
| BF464027  | hint1,Hint,lpk1,PKCl-1,PRKCNH1,AA673479                   | 0.00061  | -4.60938  |
| NM_025933 | higd2a,AA690237,2010110M21Rik                             | 1.40E-36 | -2.50244  |
| NM_019814 | higd1a,Hig1,AI303276,AW049839,2210020B17Rik,7420700H20Rik | 3.17E-07 | -1.64931  |
| BB726995  | hif1an,FIH1,2310046M24Rik,A830014H24Rik                   | 7.34E-21 | -2.2662   |
| BI737649  | hic2,HRG22,AA409108,mKIAA1020                             | 4.69E-19 | -3.71955  |

|           |                                                          |          |           |
|-----------|----------------------------------------------------------|----------|-----------|
| BC026437  | Hibch,Al648812,MGC31364,261050915Rik                     | 0.00059  | -2.93426  |
| BB805796  | Hibadh,Al265272,6430402H10Rik                            | 0        | -2.77946  |
| AV290575  | Hfe2,HJV,DL-M,Rgmc,                                      | 9.51E-34 | -3.56474  |
| BM239854  | Herc3,Al646603,MGC30404,mKIAA0032,5730409F18Rik          | 6.53E-09 | -2.27464  |
| AW701798  | Herc2,rjs,jdf2,KIAA0393                                  | 1.32E-43 | -1.7921   |
| AK009239  | Hemk1,AW049265,2310008M14Rik                             | 0.00008  | -2.52678  |
| AK009957  | Hddc2,MGC129436,MGC129437,2310057G13Rik                  | 0.00053  | -1.94369  |
| BF580567  | Hcfc1r1,HPIP                                             | 3.03E-09 | -1.59066  |
| BB129992  | Hccs                                                     | 4.92E-42 | -1.91296  |
| AV209097  | Hbld2,1810010A06Rik                                      | 0        | -2.48951  |
| BC022589  | Hbld1,0710001C05Rik,5730594E03Rik                        | 9.07E-14 | -2.21751  |
| BC027434  | Hbb-b2,Al036344                                          | 1.87E-08 | -3.85625  |
| AF071431  | Hbb,beta-globin                                          | 6.28E-16 | -3.63897  |
| AK011116  | Hba-a1,Hba1                                              | 9.88E-08 | -3.4271   |
| NM_134248 | Havcr1                                                   | 3.40E-05 | -2.11345  |
| L07645    | Hal,Hsd,his,histidase                                    | 2.31E-06 | -31.19997 |
| BC004749  | Hagh,Glo2,Glo-2,Rsp29,BC019817                           | 1.11E-19 | -2.53626  |
| NM_008212 | Hadhsc,Hadh,AA409008,AU019341,AW742602                   | 4.29E-32 | -3.73111  |
| AV150884  | Hadhb,Mtpb,4930479F15Rik                                 | 7.77E-34 | -1.91048  |
| AV078914  | Hadh2,Ads9,ERAB,17bHSD10,Hsd17b10                        | 0.00043  | -1.56815  |
| BB202287  | H60                                                      | 3.37E-27 | -8.29528  |
| AI323545  | H2-Ke6,Ke6, Ring2,H-2Ke6,MGC107650,D17H6S112E            | 0.0007   | -1.78446  |
| M58156    | H2-D1,H-2D,H2-D,MHC B7.2                                 | 0.00009  | -2.10277  |
| NM_026230 | H2afy2,macroH2A2,4933432H23Rik                           | 3.79E-06 | -2.14479  |
| BG092470  | H2afv,H2av,C530002L11Rik                                 | 3.89E-18 | -3.35177  |
| NM_008195 | Gys3                                                     | 4.97E-23 | -9.28759  |
| AU017667  | Gyg,Gyg1,AU017667                                        | 0        | -2.26632  |
| BC024464  | Gup1,1110011D13Rik                                       | 0        | -18.99034 |
| BC027306  | Gtpbp7,Gm169,MGC28365                                    | 1.63E-24 | -2.6928   |
| AV173739  | Gtf3a,2010015D03Rik,261011101Rik,5330403M05Rik           | 0.00065  | -1.77327  |
| BG075741  | Gtf2a2,12kDa,Tfllg                                       | 8.73E-07 | -1.62879  |
| BG070887  | Gtdc1,E330008O22Rik                                      | 3.94E-09 | -1.76527  |
| AB041613  | Gstz1,MAAI                                               | 9.35E-11 | -4.13112  |
| BC012707  | Gstt2,Yrs,mGSTT2,Al266894                                | 4.67E-07 | -2.23111  |
| BC012254  | Gstt1,Gstt1-1,Al255817                                   | 4.88E-19 | -6.66692  |
| NM_010360 | Gstm5                                                    | 1.13E-14 | -2.57245  |
| NM_008183 | Gstm2,Gstb2,Gstb-2                                       | 0.00029  | -1.76043  |
| AK002661  | Gstk1,AW260476,0610025I19Rik                             | 4.92E-30 | -5.89465  |
| NM_010357 | Gsta4,5.7,GST,mGsta4,GST 5.7                             | 1.35E-07 | -6.75751  |
| AV025588  | Gsn,MGC28083                                             | 3.02E-13 | -3.09252  |
| AV090328  | Grsf1,C80280,D5Wsu31e,B130010H02                         | 1.34E-15 | -2.64667  |
| NM_024478 | Grpel1,MGC8152,AA408748,mt-GrpE#1,mt-Grpel1              | 7.07E-11 | -1.62057  |
| AW212189  | Grina,Lag,1110025J15Rik                                  | 3.54E-21 | -3.24674  |
| BM114840  | Gria1,Glr1,                                              | 0.0001   | -2.81131  |
| NM_080289 | Grhpr,1110059D05Rik,6430629L09Rik                        | 1.81E-25 | -4.06223  |
| NM_011825 | Grem2,Prdc,Gremlin2                                      | 0.00008  | -12.24927 |
| NM_016719 | Grb14,Al505286                                           | 8.79E-31 | -5.42139  |
| BB071890  | Grasp,tamalin                                            | 0.00012  | -1.76451  |
| BI648645  | Gpt2,ALT2,C87201,AU014768,AU041193,4631422C05Rik         | 2.09E-06 | -7.91512  |
| AK008086  | Gpt1,Gpt-1,1300007J06Rik,2310022B03Rik                   | 3.30E-12 | -9.33921  |
| BB100861  | Gpsm2,Pins,6230410J09Rik                                 | 2.34E-10 | -1.75773  |
| BF159976  | Gpr56,Cyt28,TM7LN4,TM7XN1                                | 1.01E-08 | -6.18949  |
| BB520532  | Gpr30,Ceprl,FEG-1,CMKRL2,GPCR-Br,6330420K13Rik           | 1.05E-06 | -3.52366  |
| BB762731  | Gpr155,PGR22,DEPDC3,                                     | 1.82E-11 | -3.63534  |
| BQ177047  | Gpr146,PGR8,MGC7035,BC003323                             | 2.11E-12 | -4.0417   |
| AW547876  | Gpr116,Al528491,mKIAA0758,9330185D23,8430401C09Rik       | 3.05E-13 | -2.69901  |
| BE992059  | Gpi1,Amf,Org,Gpi-1,Gpi1s                                 | 5.83E-42 | -1.96377  |
| AA170590  | Gphn,GPH,geph,                                           | 1.81E-24 | -2.77943  |
| BQ175968  | Gpd2,GPDH,Gdm1,                                          | 2.18E-06 | -2.98521  |
| BB727537  | Gpd1,D9Ertid660e,2210409H23Rik                           | 3.32E-18 | -2.15338  |
| BB503189  | Gpd1,Gdc1,Gdc-1,Al747587,KIAA4010,mKIAA4010              | 4.96E-41 | -17.91979 |
| BB530689  | Gpc4,AF311610,Al385680,Al661372,K-glypican,9530073D23Rik | 4.45E-08 | -1.99384  |
| NM_008149 | Gpam,GPAT                                                | 7.01E-38 | -4.5211   |
| U82470    | Got2,Got-2,mAspAT,FABP-pm,                               | 3.70E-14 | -2.91288  |
| AA792094  | Got1,Got-1,cAspAT,Al789014                               | 8.39E-19 | -4.49204  |
| NM_018748 | Golga4,Olp-1,Al225887,AU019508                           | 2.38E-11 | -1.90859  |

|           |                                                  |          |           |
|-----------|--------------------------------------------------|----------|-----------|
| AK008566  | Gnpnat1,EMeg32,Gpnat1,Gsnpat,AU017428,AU040593   | 0.00004  | -1.78252  |
| NM_010322 | Gnpat,DAPAT,DHAPAT,AU019525,D1ErtD819e           | 1.26E-06 | -1.85471  |
| AV216608  | Gng5,G(y)5                                       | 4.75E-11 | -1.649    |
| BC016135  | Gnb5,GBS,flr,Gbeta5                              | 2.77E-09 | -1.83132  |
| AW122571  | Gmps,AA591640,AI047208                           | 1.05E-07 | -1.77571  |
| NM_025508 | Gmpr,AV028449,2310004P21Rik                      | 1.20E-08 | -4.90051  |
| AU044197  | Gmppa,1810012N01Rik                              | 0.00011  | -1.70733  |
| BE647179  | Gm967                                            | 2.85E-23 | -3.55061  |
| AV111575  | Gm561                                            | 3.65E-38 | -3.19626  |
| BB829749  | Gm266                                            | 0.00091  | -4.77746  |
| AW457248  | Gm1646                                           | 0.00021  | -2.731    |
| BB667214  | Gm114                                            | 9.24E-06 | -1.81659  |
| BB549174  | Gm106                                            | 0.00073  | -3.33014  |
| BB314342  | Gm1                                              | 0.00001  | -2.42966  |
| BQ044689  | Gm1                                              | 7.17E-22 | -14.65984 |
| AI391218  | Glul,GS,Glns                                     | 0.00017  | -2.2313   |
| AI391218  | Glul,GS,Glns                                     | 0.00077  | -4.14398  |
| AK003894  | Glt8d2,MGC100315,1110021D20Rik                   | 0.00001  | -2.32317  |
| BB008997  | Glt28d2,GLT28D1L,4732486J07Rik                   | 0.00014  | -2.34749  |
| BE983473  | Gls,6330442B14,B230365M23Rik                     | 1.74E-06 | -1.95439  |
| BG069790  | Glr5,AU020725,2310004O13Rik,2900070E19Rik        | 3.46E-09 | -1.8891   |
| NM_023505 | Glr2,Grx2,AI645710,1700010P22Rik                 | 7.28E-15 | -2.54322  |
| BC024663  | Glo1,GLY1,Qglo,Glo-1,Glo-1r                      | 1.84E-07 | -1.76247  |
| NM_019832 | Gkap1,42kDa,Gkap42,4933400B15Rik                 | 5.23E-07 | -1.73032  |
| NM_010284 | Ghr,GHBP,GHR/BP,AA986417                         | 2.89E-21 | -2.31053  |
| BC010224  | Ghitm,C77840,PTD010,1010001P14Rik                | 0        | -2.48038  |
| BB026315  | Gh                                               | 9.79E-06 | -5.03258  |
| AV279768  | Ggnbp1                                           | 0.00062  | -2.41284  |
| AV221299  | Gfra1,AU042498                                   | 1.86E-08 | -2.76217  |
| AK018125  | Gfm1,Gfm,AW545374,D3Wsu133e                      | 2.50E-14 | -2.63177  |
| AK018125  | Gfm1,Gfm,AW545374,D3Wsu133e                      | 2.19E-17 | -3.52226  |
| BB832885  | Gemin7,AI120175,AI461688,2400008I04Rik           | 0.00002  | -1.84282  |
| NM_010268 | Gdap10                                           | 1.82E-06 | -2.95474  |
| BB419318  | Gdap1                                            | 0.00042  | -2.33979  |
| AU017649  | Gdap1                                            | 5.41E-15 | -11.7289  |
| AU017649  | Gdap1                                            | 6.85E-28 | -17.39775 |
| AK003189  | Gcsh,1100001L02Rik,5730591C18Rik                 | 2.39E-16 | -1.78318  |
| NM_008097 | Gcdh,D17825,AI266902,9030411L18                  | 1.59E-18 | -3.26296  |
| BC021450  | Gca,AI573844,5133401E04Rik                       | 0.00024  | -4.07373  |
| NM_028803 | Gbe1,D16ErtD536e,2310045H19Rik,2810426P10Rik     | 1.40E-45 | -2.88401  |
| NM_008095 | Gbas,AV006093,Nipsnap2                           | 1.52E-07 | -1.84428  |
| BC026208  | Gats,AW742413,7530428J21Rik                      | 8.61E-06 | -2.04636  |
| BM214048  | Gata6,GATA-6,AA410133                            | 0.00082  | -5.13365  |
| BM507943  | Gas2,Gas-2                                       | 6.92E-10 | -4.34534  |
| U01023    | Gart,Gaps,Prgs                                   | 1.12E-07 | -1.87773  |
| AA119261  | Ganc,FLJ00088,mFLJ00088,9330160A12,5830445O15Rik | 0.00013  | -3.24191  |
| AF015887  | Gamt,Spintz1,AA571402                            | 2.78E-06 | -3.66081  |
| NM_134045 | Galnt1,AI415388,5730405L21Rik,mpp-GalNAc-T16     | 7.24E-07 | -2.99784  |
| NM_144731 | Galnf7                                           | 2.30E-05 | -1.56914  |
| BQ268470  | Gabra1,Gabra-1                                   | 1.93E-15 | -5.29851  |
| BB357227  | Gaa,E430018M07Rik                                | 0.0007   | -1.8822   |
| BG065310  | G3bp,C87777,AI849976                             | 2.82E-27 | -2.44753  |
| NM_008059 | G0s2,AI255151,AV006465                           | 0        | -4.39429  |
| Y17709    | Fzd9,mfz9                                        | 5.86E-06 | -4.00647  |
| AV292354  | Fzd4,Fz4                                         | 7.18E-42 | -2.7355   |
| BM123442  | Fyco1,Mem2,RUFY3,ZFYVE7,2810409M01Rik            | 0.00074  | -2.73506  |
| AV002675  | Fxyd2,Atp1g1                                     | 0.00023  | -7.18195  |
| NM_019503 | Fxyd1,PLM,PML,0610012C17Rik,1110006M24Rik        | 0.00001  | -2.74467  |
| BB385925  | Fxr1h,Fxr1,Fxr1p,1110050J02Rik,9530073J07Rik     | 5.96E-06 | -1.83293  |
| AV007132  | Fxn,FA,X25,FARR,Frda                             | 0        | -6.59811  |
| AI510221  | Func2,DC44,HCBP6,4833415N24Rik                   | 0        | -2.31858  |
| AK007686  | Func1,1500005J14Rik,1810033P05Rik                | 2.41E-08 | -1.62816  |
| NM_011936 | Fto,AW743446,mKIAA1752                           | 1.12E-12 | -1.70333  |
| NM_010239 | Fth1,FHC,Fth,MFH,AL022624,AL033366               | 1.45E-09 | -1.70881  |
| U91905    | Frzb,Frp,Sfrp3,fritz,frzb-1,frezzed              | 3.12E-07 | -6.06915  |
| BB353860  | Frat2,MGC37615                                   | 2.68E-10 | -11.26257 |

|           |                                                          |          |           |
|-----------|----------------------------------------------------------|----------|-----------|
| BB469140  | Frap1,FRAP,flat,                                         | 0.00011  | -4.83501  |
| AV322952  | Foxp2,CAG-16,D0Kist7,AI449000,2810043D05Rik              | 0.00033  | -2.92831  |
| AF323488  | Foxn4                                                    | 0.00082  | -3.60308  |
| BM206907  | Foxk2,1110054H05Rik,5730434B08Rik,6230415M23Rik          | 0.00002  | -1.57305  |
| BC011229  | Fmo1                                                     | 1.04E-26 | -4.41933  |
| NM_010228 | Flt1,Flt-1,sFlt1,VEGFR1,VEGFR-1,AI323757                 | 0.00022  | -2.06856  |
| BB118974  | Flot2,Esa,AI573412                                       | 1.05E-27 | -2.30263  |
| AV269574  | Flcn,Bhd,FLCL,AU014660,MGC37841,B430214A04Rik            | 0.00001  | -1.52656  |
| BB763578  | Fkrp,MDC1C,LGMD11,AI842067,AI847300,A830029B19Rik        | 1.86E-14 | -2.22908  |
| NM_013902 | Fkbp3,25kDa,FKBP25                                       | 2.16E-20 | -1.64454  |
| AF126746  | Fiz1,AI790204,FLJ00416,MGC117900,mFLJ00416               | 3.53E-06 | -1.67073  |
| NM_008016 | Fin15                                                    | 1.37E-09 | -2.36848  |
| BB479296  | Fign,fi,fidget                                           | 0.00002  | -3.07873  |
| BG069603  | Fiat,4932441K18                                          | 2.42E-10 | -2.07216  |
| BG066491  | FHOS2,KIAA1695,mKIAA1695                                 | 3.55E-11 | -2.42626  |
| BC006048  | Fh1,Fh-1                                                 | 0        | -2.81866  |
| BF136544  | Fgl2,AI385601,musfiblp                                   | 5.08E-09 | -2.48522  |
| NM_023304 | Fgf22,FGF-22,2210414E06Rik                               | 0.00086  | -4.56125  |
| AF020737  | Fgf13,Fhf2                                               | 1.66E-10 | -1.50951  |
| AI649186  | Fgf1,Fam,Fgfa,Dffrx,Fgf-1                                | 8.65E-09 | -2.34347  |
| BM120195  | Fgd5,ZFYVE23,FLJ00274,mFLJ00274,C330025N11Rik            | 2.06E-06 | -1.85665  |
| BM206792  | Fez2,9030616F16,D17Erttd315e                             | 0.00009  | -1.60511  |
| AY049085  | Fev,Pet1,Pet-1,mPet-1                                    | 0.00064  | -2.97109  |
| BM211336  | Fech,Fcl,fch,AI894116                                    | 5.22E-10 | -1.77023  |
| D43690    | Fdx1                                                     | 0        | -4.23993  |
| BB028312  | Fdft1,SS,SQS                                             | 0        | -3.31278  |
| NM_007995 | Fcna,Fcn1                                                | 0.00035  | -3.57992  |
| BB553906  | Fbxw14,Fbx12,Fbxo12,AU045528,MGC117492,E330009N23Rik     | 0.00019  | -3.78794  |
| NM_023605 | Fbxo9,AA986398,9030401P18Rik                             | 3.89E-07 | -1.71237  |
| BG867006  | Fbxo3,Fba,AI046358,1200002G09Rik,1700026K02Rik           | 1.76E-21 | -2.16134  |
| BB003709  | Fbxl4,FBL4,FBL5,AI836810,4732456I21                      | 1.61E-17 | -2.04991  |
| AV282462  | Fbxl19,Fbl19,BC059812,6030430O11                         | 0.00021  | -4.07685  |
| AK004419  | Fbxl17,Fbx13,Fbxo13,AI452053,6330576B01Rik,C130023C01Rik | 0.00005  | -1.67769  |
| NM_007994 | Fbp2,Fbp1,Fbp-1                                          | 9.17E-15 | -52.26894 |
| BB496845  | Fbp1,Fbp2,Fbp-2,FBPase 1                                 | 0.00019  | -2.10431  |
| BF228318  | Fbln2                                                    | 0.00021  | -2.14407  |
| AF127033  | Fasn,FAS,A630082H08Rik                                   | 1.03E-09 | -7.01687  |
| AK020164  | Fars2,Fars1,2810431B21Rik,6720478K01Rik                  | 0.00093  | -1.66595  |
| BF018996  | Fank1,AI850911,1700007B22Rik                             | 0.00053  | -3.73085  |
| AV066322  | Fahd2a,Cgi-105,1500003K14Rik,B430104H02Rik               | 9.50E-16 | -2.84091  |
| BC026949  | Fahd1,AV002085,1110025H10Rik                             | 2.60E-10 | -3.28028  |
| NM_007983 | Faf1,Fam,Dffrx,AA408698                                  | 1.12E-08 | -1.68827  |
| BC002148  | Fabp4,Ap2,Lbpl,ALBP/Ap2                                  | 1.52E-24 | -3.63864  |
| NM_010174 | Fabp3,Mdgi,Fabph1,Fabph4,H-FABP,Fabph-1,Fabph-4          | 0.00012  | -2.30588  |
| NM_007978 | F8a,DXBay18,DXUcsf1,AI852759                             | 0.0002   | -5.03412  |
| BM119523  | F830021D11Rik,AA408674,                                  | 3.54E-11 | -1.82316  |
| NM_028784 | F13a1,F13a,AI462306,1200014I03Rik                        | 0.00033  | -2.58118  |
| BB760085  | Eya1,bor                                                 | 1.20E-23 | -5.14581  |
| BB826950  | Extl1,D430033M16Rik                                      | 3.58E-08 | -3.14071  |
| NM_025568 | Exosc7,AV212732,mKIAA0116,2610002K22Rik                  | 4.53E-10 | -1.52013  |
| BB749620  | Exoc7,70kDa,Exo70,sec70,mKIAA1067                        | 1.66E-11 | -2.47135  |
| BC026859  | Exoc6,Sec15,                                             | 1.06E-07 | -2.96164  |
| BF457860  | Exoc3,Sec6,Sec6l1,E430013E20Rik                          | 0.00069  | -1.61718  |
| BB762153  | Exdl1,4932702D22Rik                                      | 0.00005  | -2.55287  |
| AI840508  | Evi2a,Evi2,Evi-2,AW491894                                | 2.63E-20 | -3.54446  |
| BC010592  | Ethe1,Hsco,MGC102424,0610025L15Rik                       | 0.00016  | -2.62124  |
| BC012522  | Etfhd,AV001013,0610010I20Rik                             | 8.41E-45 | -2.90871  |
| BI692487  | Etfb,0610009I16Rik,2810441H06Rik                         | 4.89E-11 | -3.83261  |
| BC003432  | Etfa,D9Erttd394e,2010200I21Rik                           | 0        | -3.09117  |
| BM120846  | Esrrg,ERR3,Errg,NR3B3,mKIAA0832                          | 7.49E-07 | -3.4851   |
| AI505281  | Eral1,Era,MEIRA-S,                                       | 0.00006  | -1.9056   |
| NM_007940 | Ephx2,Eph2,AW106936                                      | 1.29E-34 | -14.42835 |
| NM_010145 | Ephx1,Eph1,Eph-1,AI195553                                | 0.00088  | -2.20664  |
| AF353717  | Epdr2,Ucc1,Epdm2                                         | 0        | -3.79641  |
| BC017137  | Epb4.1,4.1R,Elp1,Elp-1,                                  | 1.02E-07 | -10.88565 |
| AI551101  | Ep400,p400,mDomino,AU023439,                             | 9.74E-08 | -3.39025  |



|           |                                                          |          |           |
|-----------|----------------------------------------------------------|----------|-----------|
| BB022415  | Entpd4,Lysal1,AI414893,                                  | 0.00073  | -1.85602  |
| NM_009849 | Entpd2,Cd3911,NTPDase-2                                  | 6.13E-08 | -3.25766  |
| BC011294  | Enpp5,D17Abb1e,KIAA4152,mKIAA4152                        | 3.25E-30 | -7.90677  |
| BG920295  | Enpp4,Gm90,AA986363,                                     | 8.65E-07 | -2.93422  |
| NM_007933 | Eno3,Eno-3                                               | 1.57E-14 | -2.75159  |
| NM_007931 | Endog                                                    | 8.01E-19 | -5.87706  |
| AV351746  | Emx2os,empty spiracles 2 opposite strand                 | 0.00004  | -2.06551  |
| AK012072  | Elp3,2610507P14Rik                                       | 0.00016  | -1.51613  |
| BQ174957  | Elov17,AI840082,9130013K24Rik                            | 0.00055  | -2.52258  |
| BB139475  | Ell,Men,Ell1                                             | 9.73E-06 | -2.65758  |
| BI453292  | Eif4ebp2,4E-BP2,PHAS-II,BC010348,2810011119Rik           | 0.00002  | -2.15409  |
| BB406487  | Eif4e,l4e,eIF-4E,Eif4e-ps,MGC103177                      | 3.83E-27 | -1.89412  |
| AK002778  | Eif3s5,AA409853,MGC90606,0610037M02Rik                   | 2.14E-11 | -1.67098  |
| BB379268  | Eif3s1,C78575,AA409117                                   | 2.35E-09 | -1.95837  |
| AA985754  | Eif2s2,EIF2,38kDa,EIF2B,                                 | 2.80E-09 | -1.71519  |
| AI415184  | Eif2b2,EIF2B,C85417,AA409345,EIF-2Bbeta                  | 0.00013  | -1.57043  |
| BG073346  | Eif1ay,AI426898,1500010B24Rik                            | 9.53E-06 | -2.48735  |
| BI693609  | Eif1,MGC6503,Sui1-rs1,MGC101938                          | 2.27E-08 | -1.78139  |
| NM_023737 | Ehhadh,HD,LBP,MFP,LBFP,PBFE,L-PBE,1300002P22Rik          | 4.47E-09 | -3.32722  |
| BE995700  | Egln1,ORF13,SM-20,C1orf12,AI503754                       | 0.00082  | -1.88392  |
| NM_010113 | Egf,AI790464                                             | 9.97E-11 | -7.27297  |
| BC019531  | Efhd1,PP3051,AI452351,MGC103094,4931430I01Rik            | 0.00045  | -6.8145   |
| BC025062  | Efcab2,1700073K01Rik,D830011E08Rik                       | 0.00082  | -2.5383   |
| C86191    | Eef2k,C86191,eEF-2K                                      | 1.39E-14 | -2.91083  |
| NM_007906 | Eef1a2,S1,wst,Eef1a,wasted                               | 1.37E-11 | -7.69306  |
| BB005258  | Ecm2,BC065151,MGC107322,9030618O22Rik                    | 1.82E-07 | -2.37523  |
| BI111416  | Echs1,C80529                                             | 0.00001  | -3.76689  |
| NM_025855 | Echdc1,AI314462,AI930038,D10Ert667e,1700028A24Rik        | 0.00003  | -2.50878  |
| NM_016772 | Ech1,AA617331,MGC107274                                  | 7.43E-29 | -3.70271  |
| AK014058  | Ebf3,O/E-2,KIAA4201,mKIAA4201,3110018A08Rik              | 1.40E-06 | -1.87828  |
| U71189    | Ebf2,Mmot1,O/E-3,D14Ggc1e                                | 3.53E-11 | -4.80707  |
| BG069656  | E430034L04Rik,G3BP,G3BP2,AA409541,KIAA0660,mKIAA0660     | 7.04E-16 | -1.74961  |
| BE628523  | E430004N04Rik,BB160712,A430108D01                        | 0.00025  | -4.62134  |
| BB820889  | E230008J23Rik                                            | 1.75E-08 | -2.80294  |
| BB530633  | E130010M05Rik                                            | 0.00053  | -17.11174 |
| AW060797  | E030025D05Rik,RP23-398G11.2                              | 0.00067  | -3.83969  |
| AY029255  | Dynll2,Dlc2,C87222,                                      | 1.65E-08 | -2.89202  |
| BC018220  | Dym,MGC18957,1810041M12Rik,4933427L07Rik,C030019K18Rik   | 2.29E-07 | -5.18391  |
| BB324672  | Dvl1,Dvl,KIAA4029,mKIAA4029                              | 0.00032  | -2.99298  |
| BC025048  | Dusp7,MKPX,MKP-X,PYST2,AU015694                          | 0.0003   | -5.00396  |
| BC018204  | Dusp26,Skp3,2310043K02Rik                                | 2.53E-11 | -8.3488   |
| AK004912  | Dusp23,LDP-3,MGC73633,1300005N15Rik                      | 7.37E-11 | -3.12873  |
| NM_134068 | Dusp22,JKAP,JSP1,MKPX,AW212235,                          | 0.00003  | -1.97471  |
| NM_024438 | Dusp19,SKRP1,C79103,TS-DSP1,5930436K22Rik                | 5.33E-12 | -2.53247  |
| NM_022019 | Dusp10,MKP-5,AI158871,2610306G15Rik                      | 2.77E-10 | -3.42972  |
| NM_013642 | Dusp1,erp,mkp-1,3CH134,Ptpn16,U19515                     | 0.00027  | -1.72363  |
| BB396413  | Dus1l,1110032N12Rik                                      | 0.00065  | -1.61171  |
| AK017400  | Dtnbp1,sdy,AW048963,dysbindin,5430437B18Rik              | 1.20E-08 | -1.77578  |
| NM_030598 | Dscr1l1,MCIP2,ZAKI-4                                     | 1.78E-13 | -3.82253  |
| BC002090  | Drap1,2310074H19Rik                                      | 5.53E-14 | -3.69289  |
| NM_010072 | Dpm1,AI118379,AI194292                                   | 2.08E-25 | -1.83322  |
| AI647687  | Dpep1,MBD,AI327012                                       | 7.02E-11 | -3.90534  |
| BI249075  | Dp1,Reep5,R74856,DP1/TB2,                                | 1.11E-10 | -2.25596  |
| BB795072  | Dock9,AA959601,AW538057,Zizimin1,                        | 0.00035  | -1.80815  |
| BB656539  | Dock4,AF263288,mKIAA0716                                 | 1.55E-10 | -5.56308  |
| BB795491  | Dnmt3a,W91664,AU015806                                   | 0.00077  | -1.96934  |
| AK009174  | Dnase1l1,G4.8,AI324885,2310005K03Rik                     | 0        | -6.72461  |
| NM_020566 | Dnajc4,Hspf2,Mcg18,2010301J22Rik                         | 1.16E-08 | -2.50077  |
| AV053772  | Dnajc19,Tim14,AA959924,1810055D05Rik                     | 0        | -3.18465  |
| NM_025384 | Dnajc15,Dnajd1,1110003P16Rik                             | 1.70E-40 | -3.1705   |
| NM_013888 | Dnajc12,Jdp1,mJDP1                                       | 1.90E-10 | -4.41958  |
| BB531733  | Dnajc11,E030019A03Rik                                    | 0.00091  | -1.60423  |
| AI664344  | Dnajb5,Hsc40,Hsp40-3,AI462558,1110058L06Rik              | 0.00011  | -2.85711  |
| AK004575  | Dnaja3,Tid-1,Tid1l,C81173,1200003J13Rik,1810053A11Rik    | 6.06E-31 | -2.2688   |
| C77509    | Dnaja2,DNAJ,DNJ3,mDj3,Dnaj3,HIRIP4,PRO3015,2010206B19Rik | 2.75E-23 | -2.15305  |
| BB283300  | Dnaja1,Hsj2,Nedd7                                        | 2.80E-07 | -5.55013  |

|           |                                                        |          |           |
|-----------|--------------------------------------------------------|----------|-----------|
| AI594683  | Dmn,Syn,AI852401,MGC56976,E130104F11,4930412K21Rik     | 2.38E-10 | -4.66729  |
| BB148868  | Dmd,mdx,pke,Dp427,DXSmh7,DXSmh9                        | 7.40E-22 | -3.2188   |
| AV338180  | Dlx6os1,Evf1,Shhrs,mEvf-1                              | 0.00016  | -2.64157  |
| BC006702  | Dist,DLTS,1600017E01Rik,4632413C10Rik,4930529O08Rik    | 5.99E-11 | -1.84587  |
| BB131767  | Dlgap1,Gkap,Sapap1                                     | 0.00047  | -2.93838  |
| AI647805  | Dld,AI315664,AI746344                                  | 0        | -2.17698  |
| AV336908  | Dlat,DLTA,PDC-E2,6332404G05Rik                         | 0        | -3.45559  |
| AW988060  | Dirc2,RCC4,MGC47126                                    | 0.00047  | -2.74494  |
| BM208197  | Dicer1,D12ErtD7e,mKIAA0928,1110006F08Rik               | 0.00077  | -1.60252  |
| AB045132  | Dhrs4,RRD,mouNRDR,D14Ucla2                             | 3.58E-09 | -2.01022  |
| AK019346  | Dgcr6,AU044152                                         | 0.00099  | -3.03794  |
| AK002443  | Dgat2,DGAT-2,0610010B06Rik                             | 5.70E-10 | -9.02283  |
| BB446076  | Dffa,ICAD,DFF35,Dff45,ICAD-L,ICAD-S,A330085O09Rik      | 6.35E-11 | -1.88944  |
| NM_021428 | Dexi,Myle,AI836170,AW413143,D16Bwg0586e,1810029J14Rik  | 7.99E-07 | -1.79632  |
| NM_007847 | Defcr-rs2,CRS4C,CRS4C-1,                               | 7.08E-07 | -8.00603  |
| BG067978  | Defb8,mBD8,Defr1                                       | 0.00007  | -2.25304  |
| BM121177  | Dedd,DEFT,KE05,FLDED1,Dedpro1,CASP8IP1                 | 7.18E-09 | -2.10203  |
| NM_026172 | Decr1,Decr,Nadph,1200012F07Rik                         | 0        | -3.97446  |
| AK003863  | Deb1,AI463209,1110020I04Rik                            | 0        | -2.7209   |
| BB829482  | Ddx59,1210002B07Rik,4833411G06Rik                      | 2.65E-14 | -2.51027  |
| NM_017397 | Ddx20,dp103,GEMIN3                                     | 0.00045  | -1.67095  |
| NM_010027 | Ddt,C78655                                             | 3.09E-07 | -2.39947  |
| AF335325  | Ddit4l,REDD2,Smhs1,RTP801L,1700037B15Rik,1700108M02Rik | 5.56E-26 | -26.31332 |
| BB029606  | Dcun1d1,Rp42,Tes3,pTes3,C85469                         | 0.00034  | -1.60576  |
| NM_010023 | Dci,eci                                                | 2.87E-35 | -5.22597  |
| BM119370  | Dcdc2,RU2,MGC54817                                     | 0.00089  | -2.81946  |
| AV264369  | Dcbld2,Esdn,CLCP1,AW146002,1700055P21Rik               | 7.13E-08 | -2.16848  |
| NM_010022 | Dbt,D3Wsu60e                                           | 2.65E-10 | -2.8575   |
| BB550183  | Dbp                                                    | 3.02E-18 | -4.20275  |
| NM_007830 | Dbi,Acbp,ACBD1                                         | 0        | -3.28448  |
| BM228846  | Dars2,MGC99963,5830468K18Rik                           | 2.71E-08 | -3.0566   |
| AK014889  | Dap3,DAP-3,4921514D13Rik                               | 9.48E-23 | -1.71573  |
| BG094386  | Dag1,DG,D9Wsu13e                                       | 1.53E-27 | -1.88256  |
| NM_010016 | Daf1,Daf,CD55,Daf-GPI,GPI-DAF                          | 1.05E-26 | -23.90103 |
| NM_033605 | Dach2                                                  | 0.00009  | -3.23433  |
| BB522228  | Dach1,Dac,Dach,AI182278,E130112M23Rik                  | 0.00039  | -3.97547  |
| BM231046  | Dab2ip,AI480459,KIAA1743,mKIAA1743,2310011D08Rik       | 0.00034  | -1.91164  |
| BM122201  | D9ErtD402e,Gm1129,MGC91156                             | 0        | -4.41182  |
| NM_134147 | D930010J01Rik,AI604841,AW743046                        | 2.12E-33 | -6.45376  |
| BB521491  | D930001I22Rik,AI414861                                 | 1.11E-10 | -3.32532  |
| AW554709  | D8Wsu49e,Cda08,AI314457,2310047C21Rik                  | 0.00017  | -1.65594  |
| BB534613  | D830044I16Rik                                          | 0.00016  | -2.79996  |
| BB519435  | D830036C21Rik,Gm842                                    | 0.0001   | -4.95014  |
| BB314814  | D7ErtD715e,AU018661                                    | 1.26E-06 | -3.14555  |
| BQ174328  | D6ErtD253e,Reep1,C87808,AW558420                       | 0        | -6.19197  |
| BQ180736  | D6Bwg1452e                                             | 1.57E-29 | -1.86998  |
| BM206023  | D630014A15Rik                                          | 0.0001   | -1.53955  |
| AV378849  | D5ErtD585e,AI661024,1110001J12Rik                      | 4.17E-20 | -2.00115  |
| BG073020  | D5ErtD579e,mKIAA0232,9030221A05Rik,A930018H20Rik       | 3.07E-19 | -1.6537   |
| C77487    | D5ErtD40e,Hype,MGC117722                               | 0.00002  | -1.9299   |
| AK014348  | D5ErtD33e,1810014G04Rik                                | 0        | -3.81644  |
| AK021311  | D530037P16Rik                                          | 0.00017  | -5.94002  |
| AK021289  | D530015H24Rik                                          | 0.00017  | -2.29609  |
| BE652553  | D4Wsu53e,D4Ucla2,2700043I21Rik                         | 5.35E-08 | -2.22948  |
| BB713558  | D4ErtD429e,AV028368,9430091K04                         | 2.59E-06 | -2.84536  |
| BB433489  | D430028G21Rik,Mavs,VISA,MGC25836                       | 1.07E-17 | -2.27283  |
| BB482650  | D430015B01Rik,Precm1,FAM13A1,AI462012                  | 0.00048  | -2.92998  |
| AI854720  | D330027H18Rik,AW455481                                 | 0.00053  | -4.02466  |
| BC019947  | D2Bwg0891e,R74724,AU041050                             | 2.30E-17 | -2.58578  |
| BB472163  | D230044B12Rik                                          | 0.00004  | -1.8833   |
| BB051286  | D19ErtD678e,4933411H20Rik,6720480F16Rik                | 1.86E-06 | -2.2127   |
| AW125421  | D16Wsu65e,AW125421                                     | 5.71E-23 | -4.47716  |
| NM_138583 | D16H22S680E,T10                                        | 9.22E-06 | -3.71129  |
| AV227727  | D16Bwg1543e,AW546090,5730448P06Rik                     | 1.26E-15 | -2.51157  |
| BC011095  | D14ErtD500e,AU016300,9430093H08Rik                     | 1.70E-07 | -1.84328  |
| BB005209  | D130058I21Rik,MGC47155,RP23-48A.2.1                    | 0.00002  | -3.90501  |

|           |                                                          |          |           |
|-----------|----------------------------------------------------------|----------|-----------|
| BE685813  | D130029J02Rik,Gm585,CG1399-PB                            | 0.0005   | -1.71406  |
| NM_030150 | D11Lgp2e,B430001I08Rik                                   | 0.00057  | -1.98408  |
| NM_025918 | D11ErtD707e,2610001E01Rik                                | 4.44E-07 | -2.00943  |
| C87579    | D11ErtD461e,2210021E03Rik                                | 4.10E-09 | -14.19802 |
| BB514802  | D11ErtD333e,3010027G13Rik                                | 6.42E-08 | -2.16259  |
| NM_138601 | D10Jhu81e,ES1,C21orf33                                   | 1.24E-36 | -3.34869  |
| AU015124  | D10ErtD641e,2310005G07Rik                                | 0.00028  | -1.63092  |
| NM_026065 | D10ErtD322e,Mrpl42,2700009F22Rik,2900055D03Rik           | 0        | -3.46471  |
| NM_134007 | D10ErtD214e,AU043990,AW743335                            | 0        | -3.9271   |
| BB160479  | D030011O10Rik,9330160C06Rik                              | 0        | -2.17525  |
| AV264055  | Cyt1,C17,Gm147,4930443F05Rik                             | 5.99E-07 | -5.44237  |
| NM_007823 | Cyp4b1                                                   | 5.95E-20 | -5.46337  |
| NM_021282 | Cyp2e1,Cyp2e                                             | 1.71E-40 | -38.43403 |
| NM_024264 | Cyp27a1,Cyp27,1300013A03Rik                              | 3.01E-11 | -4.68658  |
| BB323901  | Cyhr1,Chrp,AU042374,1110031M01Rik                        | 8.63E-10 | -1.72171  |
| NM_007808 | Cycs                                                     | 0        | -3.09317  |
| NM_025567 | Cyc1,AA408921,2610002H19Rik                              | 6.76E-18 | -2.56017  |
| NM_025797 | Cyb5,0610009N12Rik                                       | 1.86E-10 | -1.75857  |
| AV370154  | Cwf19I2,9030209E10,3230401L03Rik                         | 4.32E-15 | -1.87042  |
| NM_008411 | Cuzd1,USG,ERG-1,UO-44,UTCZP,ltnmap1                      | 0.00057  | -5.51047  |
| BC026775  | Cutc,CGI-32,AI326282,2310039I18Rik                       | 2.84E-33 | -2.89626  |
| BB257147  | Cul5,VACM1,VACM-1,AI852817,                              | 0.00005  | -1.72153  |
| AV273804  | Cul3,AI467304,AW146203,mKIAA0617                         | 0        | -4.33106  |
| BC026779  | Cul2,AI327301,KIAA4106                                   | 3.95E-20 | -1.75993  |
| BC024476  | Cuedc1,AI841487,RP23-199A2.4,C330016O16Rik               | 1.07E-11 | -4.57124  |
| BC019483  | Cth,Cys3,AI314617,BC019483,MGC28655,0610010I13Rik        | 1.20E-06 | -4.10676  |
| NM_007795 | Ctf1,CT-1                                                | 4.08E-09 | -6.96755  |
| NM_009975 | Csnk2b                                                   | 0.0006   | -1.66026  |
| BC016898  | Csde1,unr,D3Jfr1,MGC19174,mKIAA0885                      | 5.66E-42 | -1.7576   |
| BB779100  | Csda,Yb2,Dpba,MSY4,Ybx3,dbpA,oxyR                        | 8.06E-11 | -1.68088  |
| AB056479  | Cs,Cis,2610511A05Rik,9030605P22Rik                       | 0        | -3.19123  |
| NM_023695 | Crybb1,BB1CRY,3110006K12Rik                              | 0.00035  | -6.1526   |
| AW124625  | Crtc1,Mect1,R74955,AI413414,MGC90786,mKIAA0616           | 0.00099  | -1.71474  |
| AK017726  | Crsp7,AI414941,AW495270,5730493L18Rik                    | 0.00041  | -4.84907  |
| BB283187  | Crot,1200003H03Rik                                       | 1.25E-07 | -2.02689  |
| BC027426  | Creg1,Creg,AA755314                                      | 3.81E-15 | -2.72355  |
| BB752639  | Crbn,piL,AF229032,AW108261,2610203G15Rik                 | 2.14E-10 | -2.2851   |
| AU015319  | Crb3,AU015179,AU041752,5730439B18                        | 0.00098  | -2.75587  |
| BB515871  | Crat,CARAT,AW107812                                      | 1.08E-21 | -5.8921   |
| NM_009949 | Cpt2,CPTII,AI323697                                      | 7.14E-23 | -4.62612  |
| AF017174  | Cpt1b,Cpt1,M-CPTI                                        | 6.18E-15 | -10.28962 |
| AW060701  | Cpsf2,Cpsf,MCPSF,100kDa,AI662483,mKIAA1367,2610024B04Rik | 0.00003  | -1.91566  |
| BG067254  | Cpox,CPX,Cpo,HCP,clone 560                               | 0.00006  | -2.08048  |
| NM_026252 | Cpeb4,AI851572,mKIAA1673,4930447D24Rik                   | 0.00019  | -1.68606  |
| BB249892  | Cpeb3,KIAA0940,mKIAA0940,4831444O18Rik                   | 2.03E-42 | -10.39658 |
| NM_007755 | Cpeb1,Cpeb,mCPEB,AU024112                                | 6.42E-10 | -2.04092  |
| BC010197  | Cpe,CPH,fat,Cph1,Cph-1,R74677,MGC7101                    | 1.15E-29 | -5.3026   |
| NM_007751 | Cox8b,COX8H,MGC107661                                    | 3.50E-10 | -4.47974  |
| NM_007749 | Cox7c,Cox7c1,COXVIIc,MGC102143                           | 8.49E-11 | -1.66559  |
| AF037370  | Cox7a1,COX7A,COX7AH,COX7AM                               | 2.56E-40 | -24.06176 |
| AV1111078 | Cox6c                                                    | 5.55E-11 | -1.65199  |
| AV167903  | Cox6b1,Cox6b,2010000G05Rik                               | 3.13E-17 | -1.58359  |
| NM_009943 | Cox6a2,VlaH,COXVlaH                                      | 4.84E-11 | -5.82712  |
| AV023206  | Cox5b,MGC117683                                          | 3.74E-12 | -1.84755  |
| NM_007747 | Cox5a,CcOX,AA959768                                      | 0        | -3.19722  |
| NM_009941 | Cox4i1,Cox4,Cox4a,AL024441                               | 4.81E-32 | -1.87104  |
| BC021498  | Cox15,MGC18952,2900026G05Rik                             | 7.07E-06 | -1.69156  |
| AK008096  | Cox11,2010004I09Rik                                      | 0        | -4.46882  |
| AV369982  | Cox10,AU042636,RP23-78H18.1,2410004F01Rik                | 0.00006  | -2.31326  |
| NM_028071 | Cotl1,Clp,1810074P22Rik,2010004C08Rik                    | 0.00015  | -2.05209  |
| BB317923  | Coro2b,CLIPINC,E130012P22Rik                             | 0.00031  | -1.72805  |
| AF098949  | Coq7,clk-1                                               | 2.80E-45 | -3.46001  |
| BC024135  | Coq6,5930427M12Rik                                       | 0.00061  | -2.14108  |
| BB108855  | Coq3,C77934,4732433J24                                   | 0.00011  | -2.46491  |
| AK009092  | Coq2,MGC91278,2310002F18Rik                              | 5.05E-23 | -2.51357  |
| NM_011991 | Cops3,Csn3,Sgn3                                          | 1.89E-19 | -1.89091  |

|           |                                                               |          |           |
|-----------|---------------------------------------------------------------|----------|-----------|
| BB264843  | Commd9,AA409293,1810029F08Rik                                 | 6.34E-13 | -1.68373  |
| AB076722  | Commd1,Murr1,AI256843                                         | 2.59E-06 | -1.88301  |
| NM_007734 | Col4a3,[a]3(IV),alpha3(IV)                                    | 0.00064  | -4.74106  |
| AV294603  | Cog7,Gm167,5630400E24Rik                                      | 0.00007  | -1.73347  |
| BC025427  | Cog6,AU018618,mKIAA1134,4933405E16Rik                         | 6.09E-25 | -1.9315   |
| AV080881  | Cobl1,Cobl1r,1810047P18Rik,D430044D16Rik                      | 4.59E-11 | -2.42377  |
| AU079588  | Cntnap2,Caspr2,mKIAA0868,5430425M22Rik                        | 0.00017  | -4.35049  |
| NM_053007 | Cntf,AI429687,MGC41235                                        | 2.91E-06 | -1.87183  |
| AI448404  | Cnot4,Not4,Not4h,Not4hp                                       | 0.00001  | -1.61019  |
| AV301999  | Cnot10,MGC37693,2600001P13Rik                                 | 0.00085  | -2.27691  |
| AK010194  | Cmya5,Tims,Srfsd,sr553                                        | 5.47E-31 | -7.86059  |
| BC023398  | Clybl,Cib,AI256068,0610033J05Rik,2310014M14Rik                | 1.87E-41 | -5.34883  |
| AV341395  | Clstn3,Cs3,CSTN3,Cst-3,mKIAA0726                              | 0.00081  | -2.33144  |
| BF020441  | Clpx,AU014732,E330029I21                                      | 3.58E-15 | -2.5011   |
| AW494443  | Clmn,AI428889,KIAA1188,mKIAA1188,9330188N17Rik                | 0.00033  | -2.73972  |
| AA210377  | Clc5,B330005L24,5730531E12Rik                                 | 1.26E-27 | -3.08181  |
| NM_011606 | Clec3b,Tna                                                    | 0.00066  | -13.89029 |
| AW554231  | Cldn12                                                        | 7.05E-26 | -2.23909  |
| BI739053  | Clcn3,Clc3                                                    | 7.40E-11 | -4.38034  |
| AJ011107  | Clcn1,adr,mto,Clc1,Clc-1,SMCC1,myotonia                       | 7.16E-11 | -23.03662 |
| BI412445  | Clcc1,Mclc                                                    | 0.00002  | -1.64753  |
| BC026688  | Clasp2,mKIAA0627,CLASP2beta,1500004F14Rik                     | 1.12E-27 | -2.24874  |
| AK009042  | Ckmt2,ScCKmit,2300008A19Rik                                   | 2.23E-09 | -11.781   |
| NM_007710 | Ckm,MCK,Ckmm,M-CK                                             | 0.00014  | -8.21602  |
| BB730767  | Cit,CRIK,Cit-k,CRIK-SK,citron-N                               | 3.50E-07 | -3.84199  |
| NM_009895 | Cish,Cis,F17,F23,CIS1,AI385595                                | 0.00004  | -4.09832  |
| NM_019686 | Cib2,AI449053,2810434I23Rik                                   | 0        | -43.63737 |
| BC019472  | Churc1,chch,My015,1700030P15Rik                               | 1.14E-31 | -3.26693  |
| BB297047  | Chrac1,YCL1,2410152E03Rik,2810406L04Rik                       | 3.61E-10 | -2.06747  |
| BC016251  | Chpt1,MGC28885                                                | 6.54E-32 | -6.45171  |
| BF180212  | Chpt1                                                         | 0        | -5.57423  |
| AF311699  | Chodl,MT75,PRED12,3110074E07Rik                               | 0.00004  | -4.3456   |
| BB263701  | Chm,Rep-1                                                     | 0.00003  | -1.52536  |
| AW556347  | Ches1,Ches1l,HTLFL1                                           | 6.99E-32 | -2.25971  |
| NM_026539 | Chd1l,Snf2p,4432404A22Rik                                     | 7.71E-07 | -2.97588  |
| BF020847  | Chchd7,1810049H20Rik                                          | 0.00001  | -1.82351  |
| BC021941  | Chchd3,AW558177,0610041L09Rik,1700039J09Rik                   | 6.44E-38 | -3.06526  |
| NM_025366 | Chchd1,MGC106657,1110001O19Rik,2400010G13Rik                  | 0        | -1.95217  |
| BC025169  | Chac1,1810008K03Rik                                           | 9.38E-07 | -8.43805  |
| AK004156  | Cgrf1,CGR19,1110038G02Rik,1810009H17Rik                       | 0.00021  | -2.08108  |
| AI323758  | Cfl2                                                          | 1.49E-26 | -2.94616  |
| NM_053200 | Ces3,TGH                                                      | 1.72E-10 | -96.75845 |
| NM_133869 | Cept1,AI788721,BB118941,9930118K05Rik                         | 4.54E-10 | -1.88116  |
| BG069719  | Celsr1,Scy                                                    | 0.00035  | -2.36977  |
| NM_033037 | Cdo1,Cdo,D18Ucla3,1300002L19Rik                               | 2.64E-41 | -13.63664 |
| BC027026  | Cdkn2c,p18,INK4c,INK4d,C77269,p18INK4c                        | 6.43E-06 | -1.51667  |
| BC016073  | Cdkal1,RP23-202F3.2,1190005B03Rik,6620401C13Rik               | 1.52E-10 | -2.0678   |
| NM_025876 | Cdk5rap1,2310066P17Rik                                        | 8.06E-32 | -2.19157  |
| AW543698  | Cdh5,7B4,VEC,CD144,VE-Cad,AA408225                            | 0.00024  | -1.91059  |
| NM_009867 | Cdh4,Rcad,AW120700,R-cadherin                                 | 7.28E-10 | -3.37416  |
| NM_011800 | Cdh20,Cdh7                                                    | 6.41E-06 | -3.60521  |
| AK016527  | Cdh13,Cdht,Tcad,T-cadherin,4932416G01Rik                      | 0.00098  | -2.84055  |
| BB622571  | Cdc73,Hrpt2,C81219,BC027756,MGC29274,MGC36559,8430414L16Rik,C | 3.17E-08 | -2.17622  |
| BF467211  | Cdc42,AI747189,AU018915                                       | 8.78E-11 | -2.23099  |
| BE952207  | Cdc37I1,Harc,Cdc37I,BB159850,2700033A15Rik                    | 0.00007  | -2.26551  |
| BI794243  | Cdc34,UBE2R1,AI327276                                         | 1.72E-11 | -2.56213  |
| BB479310  | Cdc14a,Cdc14,CDC14A2,CDC14a1,A830059A17Rik                    | 2.53E-15 | -6.89685  |
| BB038546  | Cd99I2,Xap89,Mic21I,AW548191                                  | 9.67E-07 | -1.75165  |
| NM_007652 | Cd59a,Cd59,AA987121,protectin                                 | 0.00072  | -1.66147  |
| BB534670  | Cd36,FAT,GPIV,Scarb3                                          | 2.02E-19 | -4.1154   |
| BF123439  | Cd24a,HSA,Ly-52                                               | 0.00026  | -2.54434  |
| NM_007639 | Cd1d1,Cd1a,Cd1d,CD1.1,Ly-38,AI747460                          | 0.00013  | -2.97502  |
| NM_053094 | Cd163,CD163v2,CD163v3                                         | 0.00062  | -3.04442  |
| AF199491  | Ccrn4,Ccr4,AU043840,nocturnin                                 | 0.0001   | -3.73343  |
| AA068868  | Ccnh,AI661354,AV102684,AW538719,6330408H09Rik                 | 0.00054  | -1.58236  |
| BG065754  | Ccng1,AI314029                                                | 4.27E-36 | -3.88769  |

|           |                                                    |          |           |
|-----------|----------------------------------------------------|----------|-----------|
| NM_011330 | Ccl11,Scya11,eotaxin                               | 3.29E-26 | -2.23602  |
| AV365721  | Ccdc28b,1110002E08Rik,1810010N17Rik                | 2.62E-07 | -4.24189  |
| AV100366  | Ccdc28a,AI480677,MGC19351,1700009P13Rik            | 2.75E-06 | -1.92835  |
| NM_138603 | Ccdc22,Sfc22,AI481216,DXImx40e                     | 0.00003  | -1.6681   |
| BG094881  | Ccbl2,BC037135,C430041M20                          | 2.20E-06 | -2.89846  |
| BG072084  | Cc2d1b,A830039B04Rik                               | 1.07E-07 | -2.50611  |
| BC018472  | Cbwd1,AV349248,BC018472,MGC28027,MGC59411          | 2.12E-07 | -2.07283  |
| BC010758  | Cbr2,MLCR                                          | 1.07E-09 | -3.76101  |
| NM_007620 | Cbr1,CR,Cbr,AW261796                               | 0.00007  | -1.70782  |
| AV276986  | Cblb,Cbl-b,AI429560,AI851073                       | 0.00006  | -2.12685  |
| NM_016900 | Cav2,AI447843                                      | 1.12E-10 | -2.78739  |
| AB029929  | Cav1,Cav,Cav-1,caveolin 1,caveolin-1               | 0.00014  | -2.23114  |
| NM_009804 | Cat,Cas1,Cs-1,Cas-1,2210418N07                     | 6.36E-13 | -2.20748  |
| NM_009813 | Casq1,CSQ,CSQ1,CSQ-1                               | 7.68E-12 | -4.32327  |
| NM_021531 | Carm1,PRMT4,MGC46828                               | 1.59E-19 | -2.66125  |
| NM_130859 | Card10,Bimp1,CARMA3,AI449026                       | 2.60E-08 | -2.36964  |
| X61397    | Car8,Cals,Carp,Cals1,AW546993                      | 0.00004  | -12.3217  |
| NM_007607 | Car4,AW456718                                      | 1.92E-16 | -6.77125  |
| NM_011797 | Car14,AW536446                                     | 5.80E-06 | -25.76088 |
| BI102231  | Capza2,Cappa2,AW208808,1110053K06Rik               | 7.00E-09 | -1.50467  |
| BQ257745  | Capn7,PalBH,AU022319                               | 4.33E-20 | -1.52199  |
| AI323605  | Capn3,p94,Lp82,Capa3,Capa-3,AI323605               | 5.16E-23 | -6.12726  |
| AF127766  | Capn3,p94,Lp82,Capa3,Capa-3,AI323605               | 7.86E-39 | -10.65168 |
| BM238658  | Cand2,Tp120b,mKIAA0667,2210404G23Rik               | 3.24E-08 | -2.41268  |
| BE989461  | Camsap1,C77823,PRO2405,9530003A05Rik               | 0.00071  | -1.77497  |
| BM227770  | Camk2g,Camkg,5930429P18Rik                         | 0        | -3.57868  |
| AW490258  | Camk2a,CaMKII,R74975,mKIAA0968                     | 0        | -5.98867  |
| AW543361  | Calm1,CaM,Calm,AI256814,AI327027,AI461935,AL024000 | 0        | -2.39035  |
| AK007393  | Calcoco1,Cocoa,KIAA1536,mKIAA1536,1810009B06Rik    | 0.00094  | -1.74737  |
| AV091458  | Cacng6,AW050150,2310033H20Rik                      | 3.46E-29 | -3.43355  |
| BI106777  | Cacna2d1,Cacna2,Cchl2a                             | 0.00002  | -1.67525  |
| AK014605  | Cabc1,AI462003,mKIAA0451,4632432J16Rik             | 0.00005  | -2.84694  |
| BG067367  | C86090                                             | 0.00036  | -2.61653  |
| BM898964  | C85492,Ago61,MGC31712                              | 1.84E-11 | -2.04913  |
| C76213    | C76213                                             | 3.73E-06 | -4.63306  |
| BB428892  | C730029A08Rik                                      | 0.00055  | -4.01979  |
| BB428892  | C730029A08Rik                                      | 1.52E-19 | -7.09333  |
| BC022606  | C730025P13Rik                                      | 4.96E-07 | -1.95968  |
| BB021125  | C630040K21Rik                                      | 3.76E-12 | -7.94623  |
| AU040402  | C630002B14Rik,AU040402,AW540062                    | 4.67E-06 | -2.9006   |
| BC025476  | C530044N13Rik,MGC27760                             | 0.00026  | -1.7334   |
| BB245422  | C530030K21Rik                                      | 9.24E-06 | -3.94562  |
| AV023018  | C430010P07Rik,KIAA4189,mKIAA4189,1190030G24        | 0.00015  | -1.64646  |
| BQ175552  | C330021A05Rik,Rabj,AI639580                        | 2.11E-13 | -3.73226  |
| BI664973  | C330018D20Rik,AU018666                             | 6.80E-08 | -1.97814  |
| K02782    | C3,ASP,Pip,AI255234                                | 3.17E-09 | -6.68277  |
| BB529153  | C230009H10Rik                                      | 0.00009  | -4.40688  |
| BB296103  | C130068O12Rik,STARS                                | 4.79E-20 | -6.64533  |
| AI875682  | C130065N10Rik                                      | 0.00007  | -1.8863   |
| AV089797  | C030048B08Rik,AW548102                             | 0.00044  | -1.63497  |
| BB090042  | C030044C12Rik                                      | 7.75E-12 | -2.47008  |
| BE945978  | C030010B13Rik,1700007P14Rik,5830403E09Rik          | 0.00003  | -3.856    |
| BB283753  | C030008P14Rik                                      | 0.00043  | -2.80278  |
| BM932775  | Bzw2,HSPC028,MGC7203,1110001I24Rik                 | 7.99E-13 | -2.81903  |
| AW552082  | Bves,Pop1,Popdc1                                   | 0.00091  | -2.40448  |
| BC027138  | Btbd15,6030404E16Rik                               | 0.00017  | -2.32718  |
| AV223468  | Brp44I,MGC117549,0610006G08Rik,3830411I18Rik       | 4.33E-38 | -3.0527   |
| BC018324  | Brp44,ESTM43,AA108335,                             | 0        | -2.60807  |
| BC008274  | Brp17,MR-1,Tahccp2,AI854243                        | 0.00004  | -1.84643  |
| NM_021555 | Brp16,MNCb-5873,D15ErtD741e                        | 0.00088  | -2.38599  |
| AI462244  | Brcc3,C6.1A,MGC29148                               | 1.01E-24 | -2.3093   |
| BC023146  | Bphl,AI115341,2010012D11Rik,5730533B08Rik          | 8.34E-07 | -2.34038  |
| BB610351  | Bola3,1810056O20Rik                                | 0        | -4.16755  |
| BC027558  | Bola1,1810037G04Rik                                | 4.17E-07 | -2.16539  |
| NM_009760 | Bnip3,Nip3                                         | 4.49E-09 | -2.21695  |
| AK014221  | Bmper,Cv2,CV-2,Crim3,3110056H04Rik                 | 2.55E-07 | -1.99679  |

|           |                                                           |          |           |
|-----------|-----------------------------------------------------------|----------|-----------|
| BG066334  | Bmp4,Bmp2b,Bmp2b1,Bmp2b-1                                 | 2.09E-17 | -16.76602 |
| NM_016916 | Bicap,Bc10,AI462828,MGC102074                             | 4.13E-12 | -2.50383  |
| NM_011498 | Bhlhb2,CR8,Dec1,Clast5,Sharp2,Stra13,Stra14,C130042M06Rik | 0.00045  | -2.0255   |
| AK013874  | Bfar,BAR,RNF47,AI666707,AW107665,3010001A07Rik            | 1.36E-07 | -1.5484   |
| AY057913  | Bdnf                                                      | 0.00011  | -3.66209  |
| BC019781  | Bcs1l,9130022O19Rik                                       | 1.25E-08 | -2.23822  |
| U41465    | Bcl6,Bcl5                                                 | 2.66E-16 | -2.80544  |
| BC027307  | Bcl2l13,Mil1,Mil-1,MGC38758,BCL-RAMBO,E430016C20Rik       | 0.00005  | -1.5111   |
| NM_009739 | Bckdk,AI327402                                            | 0.00004  | -3.10472  |
| AW047304  | Bckdhb                                                    | 2.51E-20 | -3.87339  |
| NM_007533 | Bckdha                                                    | 0.00003  | -3.42531  |
| NM_007530 | Bcap29,Bap29,AW208404                                     | 2.50E-34 | -2.98399  |
| AY092026  | BC054059,SMAF1                                            | 4.19E-13 | -11.73512 |
| BQ031467  | BC052040,MGC62402                                         | 1.77E-08 | -2.91924  |
| AV276428  | BC043118,AU022790,MGC58045,5031404N19                     | 2.50E-16 | -2.7972   |
| AV361804  | BC042513,RIKEN cDNA 7630402D21 gene,1455783_at            | 0.00025  | -2.79971  |
| BB174540  | BC040823,9430078B04                                       | 0.00012  | -1.51538  |
| AV367395  | BC038479,MGC47419                                         | 1.37E-06 | -23.65401 |
| BM123013  | BC038311                                                  | 0.00002  | -1.84089  |
| BB211614  | BC038167                                                  | 0.00032  | -3.25523  |
| AV146691  | BC038156,E230011F09                                       | 5.65E-23 | -1.84267  |
| BE952216  | BC034664,Gm903,MGC38622                                   | 8.18E-06 | -1.78647  |
| BB327032  | BC033915,AI447252                                         | 0.00077  | -1.90527  |
| BG276629  | BC031353,AI553555,MGC38960,                               | 0.00002  | -1.9269   |
| AK009222  | BC029722                                                  | 0.00003  | -1.83329  |
| BC028265  | BC028265,Rslcan8                                          | 0.00002  | -2.84219  |
| BC027309  | BC027309,MGC28139                                         | 0.00017  | -1.84234  |
| BC026996  | BC026996,mKIAA0476                                        | 0        | -7.909    |
| BF318681  | BC025575                                                  | 0.00014  | -5.34444  |
| AV100801  | BC024814,MGC38788                                         | 3.47E-18 | -4.11198  |
| BE626145  | BC024683,MGC30464,MGC56792,MGC118167,mKIAA1089            | 0.00055  | -2.5788   |
| AV152395  | BC024659,2900036K02Rik                                    | 5.03E-16 | -2.11739  |
| AW559011  | BC023829                                                  | 6.16E-16 | -1.51924  |
| AV341449  | BC023818,Arg99                                            | 1.46E-06 | -2.94453  |
| BC023105  | BC023105,MGC28198                                         | 6.22E-10 | -26.06609 |
| BM210917  | BC021395,KIAA4077,MGC29396,MGC36325,mKIAA4077             | 0.00041  | -1.51276  |
| BB050507  | BC021367,AI428876,BB161850,MGC29210                       | 1.03E-06 | -2.67689  |
| BB467190  | BC019943,MGC28346                                         | 0.00014  | -1.74377  |
| BB059395  | BC019806,AW492292,MGC30933,2410002F01Rik                  | 4.49E-13 | -2.36116  |
| NM_133214 | BC017612,Fn5                                              | 0.00071  | -1.69047  |
| BC017133  | BC017133,MGC27648,MGC49717                                | 2.53E-07 | -2.84741  |
| BC016495  | BC016495,AA408380,MGC25909,D630020N23Rik                  | 2.64E-06 | -2.37265  |
| BC013529  | BC013529,AA589616,MGC19209                                | 5.97E-18 | -1.88889  |
| BI099836  | BC013481,MGC18900,9530077J19Rik                           | 0.00006  | -1.97667  |
| BC012278  | BC012278,MGC18736                                         | 5.18E-11 | -2.24634  |
| BC009118  | BC009118,Cbr4,MGC6971,A730083J17Rik                       | 0        | -2.8781   |
| BC006662  | BC006662,MGC7867                                          | 0.00093  | -1.91498  |
| W59564    | BC003965,MGC7403                                          | 2.32E-11 | -1.54644  |
| BC003479  | BC003479,C79874,C80074,MGC6908                            | 5.20E-09 | -2.24532  |
| NM_030252 | BC003266,MGC7764                                          | 0.00056  | -1.85953  |
| NM_024472 | BC002216,MGC7473                                          | 4.52E-09 | -2.54041  |
| AV269187  | BB182387                                                  | 0.00078  | -4.44392  |
| BB144871  | BB144871                                                  | 1.23E-06 | -18.60348 |
| BG071718  | Bat5,NG26,Bat-5,MGC19234,D17H6S82E                        | 2.35E-16 | -1.87697  |
| BC016230  | Bag2,BC016230,MGC36682,2610042A13Rik                      | 0.00003  | -1.97675  |
| BM239035  | Bach2,MGC117590                                           | 0.00053  | -2.74018  |
| AI853240  | B3galnt2,C80633,MGC103263,A930105D20Rik,D230016N13Rik     | 2.59E-08 | -2.60497  |
| BB313577  | B330016D10Rik                                             | 0.00004  | -2.55304  |
| BM120593  | B230337E12Rik,AI115432                                    | 1.68E-17 | -2.18691  |
| AV234069  | B230205M03,MGC130380,MGC130381                            | 1.27E-08 | -1.93787  |
| NM_026592 | B230118H07Rik,NWC                                         | 0        | -3.83977  |
| BB303952  | B230107K20Rik,BB129864                                    | 8.01E-16 | -11.52603 |
| AK017382  | AW743872                                                  | 2.63E-12 | -4.858    |
| BC022157  | AW548124,ESTM17,X83346,AI115348,MGC99930                  | 7.79E-15 | -4.39445  |
| AV300673  | AW495713                                                  | 2.54E-16 | -3.19701  |
| AW495222  | AW495222                                                  | 3.01E-08 | -8.51137  |

|           |                                                                   |          |           |
|-----------|-------------------------------------------------------------------|----------|-----------|
| BB148302  | AW320017                                                          | 0        | -9.18725  |
| BM235411  | AW320013,AW536799                                                 | 0.00008  | -1.61425  |
| BB795363  | AW215868                                                          | 1.07E-13 | -1.84462  |
| BF715189  | AW209491                                                          | 0.00031  | -2.02175  |
| AW494980  | AW124847                                                          | 0.00096  | -2.07027  |
| AV246615  | AW061234                                                          | 5.01E-18 | -2.63441  |
| AI426175  | AW049829,Hsc20,AI325508,MGC41340                                  | 2.66E-09 | -2.09924  |
| BM245529  | AV312086,D430024J04                                               | 9.79E-06 | -1.50532  |
| BM213104  | AV009015                                                          | 2.89E-40 | -3.66308  |
| U80932    | Aurka,IAK,Ark1,Ayk1,Stk6,AIRK1,AU019385,AW539821,Aurora-A         | 1.52E-07 | -3.78833  |
| NM_016709 | Auh,C77140,W91705                                                 | 5.03E-43 | -19.52057 |
| AV024806  | AU040377,5930412K08                                               | 0        | -9.83317  |
| BG071197  | AU040320,A730047D20Rik                                            | 0.00001  | -1.66305  |
| AV340615  | AU023006                                                          | 2.34E-10 | -2.84924  |
| AK013145  | Atxn7I4,2810423G08Rik                                             | 0.00027  | -2.53899  |
| BB705334  | Atxn2,ATX2,Sca2,AW544490,9630045M23Rik                            | 2.49E-07 | -1.63894  |
| BC003341  | Atpbd1c,D5Erd708e,A930018B01Rik                                   | 3.38E-10 | -1.9101   |
| AV333459  | Atpaf1,ATP11,ATP11p,AI593252,6330547J17Rik                        | 3.52E-28 | -4.02699  |
| BQ176779  | Atp8a1,APLT,Atp3a2                                                | 1.29E-35 | -5.7442   |
| BI154058  | Atp6v1g1,VAG1,ATP6J,Vma10,Atp6g1,AA960677,1810024D14Rik           | 3.43E-12 | -1.92286  |
| AV105788  | Atp6v1d,VATD,Vma8,Atp6m,1110004P10Rik                             | 4.49E-17 | -2.14152  |
| NM_026536 | Atp5s,ATPW,facyor B,1110015E18Rik                                 | 7.82E-15 | -2.90931  |
| AV066932  | Atp5o,ATPO,OSCP,D12Wsu28e                                         | 8.69E-16 | -2.19301  |
| NM_013795 | Atp5l,MGC107313,MGC107547,4933437C06Rik                           | 1.75E-24 | -1.68387  |
| AV216686  | Atp5k,Lfm1,MGC107302,2610008D24Rik                                | 1.27E-26 | -2.38737  |
| NM_020582 | Atp5j2,1110019H14Rik                                              | 2.51E-12 | -1.85042  |
| NM_016755 | Atp5j                                                             | 5.82E-29 | -2.03417  |
| AF354051  | Atp5h,0610009D10Rik                                               | 5.56E-22 | -1.60839  |
| AU080319  | Atp5g3,MGC124584,6030447M23                                       | 4.59E-22 | -1.72194  |
| NM_007506 | Atp5g1                                                            | 3.39E-18 | -3.86148  |
| AK019459  | Atp5f1,C76477                                                     | 0        | -2.26382  |
| NM_025983 | Atp5e,ATPE,AV000645,2410043G19Rik                                 | 8.50E-12 | -2.7396   |
| AV019894  | Atp5d,C85518,AA960090,AI876556,                                   | 0.00013  | -1.69341  |
| NM_020615 | Atp5c1,1700094F02Rik                                              | 7.31E-42 | -2.2749   |
| NM_016774 | Atp5b                                                             | 2.61E-11 | -1.50138  |
| BM213627  | Atp5a1,Atpm,AI035633,AL022851,AL023067,D18Erd206e                 | 2.25E-24 | -2.06929  |
| BB350662  | Atp2b3,Pmca3,6430519O13Rik                                        | 0.00055  | -2.71389  |
| NM_007504 | Atp2a1,SERCA1                                                     | 5.30E-10 | -6.02568  |
| BG261955  | Atp1b2,Amog,Atpb-2                                                | 5.68E-38 | -10.5542  |
| AI845177  | Atp1a2,Atpa-3,AW060654,mKIAA0778                                  | 0        | -8.21481  |
| AU019532  | Atg9a,Atg9,Apg9I1,Atg9I1,AU019532,MGC105176                       | 0.00003  | -3.36843  |
| BB175634  | Atg4d,Apg4d,Autl4,APG4-D,Atg4dl,MGC31226,9830134P12Rik            | 1.65E-08 | -2.69233  |
| NM_025770 | Atg10,APG10,Apg10,Apg10I,Apg10p,Atg10I,AI852123,5330424L23Rik,543 | 5.08E-08 | -2.20794  |
| M94087    | Atf4,Atf-4,C/ATF,CREB2,MGC96460,TAXREB67                          | 3.54E-06 | -1.8434   |
| AV175293  | Ate1,AI225793,AW547406                                            | 0.00002  | -1.61918  |
| AV381718  | Atcay,ji,hes,CLAC,BNIP-H,BB077577,3322401A10Rik                   | 4.86E-32 | -6.58169  |
| BB357220  | Atad3a,Tob3,KIAA1273,mKIAA1273,2400004H09Rik                      | 4.78E-06 | -1.77145  |
| BF467003  | Asxl2,mKIAA1685,4930556B16Rik                                     | 2.88E-06 | -4.36826  |
| AU040643  | Asrgl1,ALP,ALP1,AU040643,AW060375,2410004D18Rik                   | 2.04E-06 | -4.44898  |
| AF289490  | Asph,BAH,cl-37,jumbug,Junctin,AI848629                            | 1.64E-31 | -5.8291   |
| BC024934  | Aspa,Acy2,Acy-2                                                   | 2.25E-06 | -5.5154   |
| AV312905  | Asf1a,C79052,2310079C17Rik                                        | 0.00033  | -1.75124  |
| AF398969  | Asb8,AI788835,4930539L19Rik,C430011H06Rik                         | 1.40E-10 | -3.49262  |
| AK003566  | Asb2,1110008E15Rik                                                | 2.38E-06 | -8.58245  |
| BB138331  | Asb15,Asb-15,4930400E23Rik                                        | 0        | -21.89543 |
| NM_080856 | Asb14,Asb-14                                                      | 0        | -17.65084 |
| AF403041  | Asb13,Asb-13,C85285,2210015B19Rik,6430573K02Rik                   | 0.00016  | -2.39815  |
| NM_080858 | Asb12,Asb-12,MGC130200,2310036C05Rik                              | 1.19E-19 | -34.46667 |
| NM_026853 | Asb11,1110067L12Rik,1600009D24Rik                                 | 0        | -12.15346 |
| AV233423  | Asb10,Asb-10,BB137407                                             | 0        | -54.34162 |
| U60881    | Art5,Yac-2                                                        | 0.00002  | -2.20918  |
| AJ311773  | Art3,4930569O04Rik                                                | 4.01E-43 | -5.05375  |
| U31510    | Art1,ADPRT                                                        | 0        | -2.24901  |
| BG796960  | Arpc5l,ARC16-2,AI852867,AW555592,AW742746,2010015J01Rik           | 2.14E-39 | -2.11713  |
| BM232782  | Armc8,HSPC056,1200015K23Rik                                       | 0.00059  | -1.88565  |
| AV233429  | Arl8b,gie1,Arl10c,2610313E07Rik,3100002J04Rik                     | 3.86E-06 | -1.85242  |

|           |                                                          |          |           |
|-----------|----------------------------------------------------------|----------|-----------|
| AV334690  | Arl6ip2,Aip-2,AA407293,AV334690,2010110I21Rik            | 0        | -18.79244 |
| NM_019718 | Arl3                                                     | 1.36E-35 | -1.74756  |
| BB140664  | Arih2,ARI2,UIP48,TRIAD1,AI843547                         | 1.79E-06 | -1.50201  |
| NM_133796 | Arhgdia,Gdi-1,RhoDGI,MGC7904,Rho-GDI                     | 0.00004  | -2.18581  |
| BM248774  | Arhgap5,p190-B,D2Mgi50                                   | 0.00014  | -1.95606  |
| AK018317  | Arhgap20,mKIAA1391,6530403F17Rik,A530023E23Rik           | 1.12E-08 | -2.99756  |
| BB757123  | Arcn1,MGC27546,MGC102316,4632432M07Rik                   | 0.00022  | -1.9696   |
| AK010060  | Araf,A-Raf,Araf1,AW495444,1200013E08Rik                  | 3.68E-17 | -2.06309  |
| AV232123  | Ar,Tfm,AW320017                                          | 8.81E-24 | -8.51759  |
| AB056091  | Aqp7,AQP 7,AQP7L,AQPap                                   | 2.97E-11 | -9.75792  |
| AI956846  | Aqp6,AI790337                                            | 8.85E-07 | -5.59551  |
| BB193413  | Aqp4,MIWC,mMIWC                                          | 5.60E-15 | -87.73282 |
| NM_007472 | Aqp1                                                     | 7.07E-11 | -4.11473  |
| BB442341  | Aprin,AS3,AI646570,AW212954,mKIAA0979                    | 3.24E-12 | -1.74356  |
| NM_009694 | Apobec2,Arp1                                             | 0        | -2.92345  |
| U15571    | Aplp2,AI790698                                           | 2.01E-06 | -1.53311  |
| NM_019735 | Apip,APIP2,CGI-29,Mmrp19                                 | 0        | -2.20839  |
| AF215896  | Apeg1,BPEG,SPEG,AW125581,                                | 9.90E-38 | -9.00819  |
| AV328620  | Apba3,Hs3st5                                             | 0.00001  | -10.30269 |
| BC001985  | Ap4s1,AI314282                                           | 4.78E-22 | -2.11983  |
| NM_009676 | Aox1,AO,RO,Aox2,MoRO,                                    | 4.59E-06 | -1.9519   |
| NM_009675 | Aoc3,SSAO,VAP1                                           | 1.56E-06 | -4.00314  |
| NM_013469 | Anxa11,Anx11,A830099O17Rik                               | 3.17E-07 | -1.65017  |
| BG793484  | Ankrd23,Darp,MARP3,AI853437,1110058D09Rik,2310041C05Rik  | 2.20E-09 | -5.78259  |
| AI507196  | Ankrd13b,AW124583,B930093C12Rik                          | 6.57E-27 | -3.742    |
| BM217754  | Ank3,AnkG,Ank-3,MGC14049,Ankyrin 3                       | 3.03E-08 | -2.55455  |
| BQ174638  | Ank2,Ank-2,AI835472                                      | 2.46E-14 | -2.94102  |
| M84756    | Ank1,nb,Ank-1                                            | 9.06E-20 | -7.28088  |
| BC019148  | Angel1,KIAA0759,mKIAA0759,1110030H02Rik                  | 0.00005  | -2.65938  |
| AK003821  | Anapc5,Anpc5,AA408751,AA536819,AA986414,2510006G12Rik    | 0.00071  | -3.84368  |
| BM122700  | Anapc13,SWM1,APC13,1810004D07Rik                         | 4.77E-14 | -2.02846  |
| AV019615  | Anapc11,R75218,1110011I19Rik                             | 0.00014  | -1.5387   |
| NM_007446 | Amy1,Amy-1,C030014B17Rik                                 | 4.43E-27 | -17.31289 |
| AW146181  | Ampd1,Ampd-1,AI553520                                    | 4.64E-19 | -16.88831 |
| BG067039  | Amot,CAG-2,C81439,D0Kist1,mKIAA1071,E230009N18Rik        | 6.78E-18 | -3.66412  |
| BB387182  | Amigo1,A,ali2,Amigo,MGC25558                             | 0.00046  | -4.07533  |
| AK017403  | Amid,PRG3,5430437E11Rik,D730001110Rik                    | 0.00002  | -1.86988  |
| NM_009665 | Amd1,Amd-1,AdoMetDC,MGC91044,MGC102468                   | 0        | -1.87878  |
| BB277912  | Als2cr2,Papk,ILPIP,ILPIPA,                               | 0        | -2.80536  |
| BB106417  | Als2cr2                                                  | 0.00006  | -2.04217  |
| NM_054085 | Alpk3,MAK,Midori,AW319487,KIAA1330,mKIAA1330,D330016D04  | 0.00028  | -1.89387  |
| AY044451  | Alpk2,Hak                                                | 0.00002  | -11.30793 |
| BC008184  | Aldoc,Aldo3,Scrg2,AI847350,AU040929                      | 0.00035  | -3.21253  |
| AK006425  | Aldoa-ps1,Aldo1-ps1,4933425L11Rik                        | 2.35E-09 | -3.09803  |
| AV030922  | Aldoa,Aldo1,Aldo-1,MGC107164                             | 2.29E-11 | -3.13319  |
| NM_134042 | Aldh6a1,AI314632,MGC37325,1110038I05Rik                  | 0        | -6.17036  |
| BQ175320  | Aldh5a1,Ahd1,Ahd-1,Ssdh1,6330403E24Rik,D630032B01Rik     | 1.07E-10 | -2.3599   |
| AI462635  | Aldh2,Ahd5,Ahd-5                                         | 0.00004  | -1.93922  |
| AK007822  | Aldh1I1,Fthfd,1810048F20Rik                              | 3.14E-07 | -7.35076  |
| NM_011921 | Aldh1a7,Aldhpb,Aldh-pb,Aldh1a4,AI987940,Ahd2-like        | 1.88E-08 | -20.21603 |
| BC024643  | Alb1,Alb-1,albumin                                       | 0.00021  | -3.80048  |
| BC022110  | Alas1,ALAS,Alas-1,Alas-h                                 | 4.82E-10 | -3.7418   |
| BC018236  | Alad,Lv                                                  | 2.74E-12 | -3.19106  |
| NM_134052 | AL024210                                                 | 0.00002  | -2.20486  |
| BB206121  | Akr7a5,Afar,Afar1,0610025K21Rik                          | 1.97E-24 | -5.93001  |
| BC012692  | Akr1e1,1810061I10Rik                                     | 0.00005  | -2.0606   |
| BB469763  | Akr1b3,AR,ALR2,Ahr1,Ahr-1,Aldr1,Akr1b1,Aldor1            | 3.13E-13 | -2.25486  |
| BG067335  | Akap1,Akap,AKAP84,C76494,C81186,AKAP121,S-AKAP84         | 0.00009  | -2.16915  |
| BC019174  | Ak3,AK-3,Ak3I,Ak3I1,Ak3I,AA407498,AI506714,1700018L02Rik | 1.12E-11 | -1.8951   |
| BB212351  | AK129375,Npl4,KIAA1499,mKIAA1499                         | 0.00084  | -2.04684  |
| NM_021515 | Ak1,Ak-1,B430205N08Rik                                   | 4.78E-20 | -4.0663   |
| BI076615  | AI875089                                                 | 0.00005  | -2.25513  |
| AI847670  | AI847670,4631428I10                                      | 2.88E-15 | -2.19605  |
| AI843755  | AI843755                                                 | 0.00022  | -26.04469 |
| AI661167  | AI663975                                                 | 9.24E-27 | -5.13199  |
| AV380966  | AI663975                                                 | 1.87E-34 | -9.99216  |



|           |                                                      |          |           |
|-----------|------------------------------------------------------|----------|-----------|
| AW494283  | AI595406,MGC62475                                    | 2.15E-07 | -3.01202  |
| BM246326  | AI553587,HZGJ,RP23-32H19.3                           | 0.00003  | -1.52339  |
| AV304145  | AI503564                                             | 0.00005  | -6.15567  |
| BG063189  | AI464131,Gm762,AA408153,AI604836                     | 0        | -10.94217 |
| BG794917  | AI462493                                             | 9.82E-10 | -1.84326  |
| AW552254  | AI428795,MGC7623,AI851761,BC002262,6030435N04        | 5.75E-08 | -2.43788  |
| AW495162  | AI426330                                             | 5.79E-07 | -2.4107   |
| BQ174439  | AI425999,AW544599                                    | 1.09E-07 | -3.00981  |
| BC024862  | AI413631,MGC36453                                    | 3.17E-12 | -1.87715  |
| BB222646  | AI325464,AA408776,AA408778                           | 0.00032  | -2.67008  |
| BE980249  | AI317395,AI482555,MGC25869                           | 6.50E-11 | -5.77494  |
| AW228053  | AI316807,EST-c39,BG694986                            | 1.93E-12 | -2.97344  |
| BM119859  | AI316787,R74819,AI848469                             | 1.70E-08 | -1.59013  |
| AW558560  | AI314976,AW558560                                    | 0.00003  | -1.68605  |
| BG076313  | AI314180,AW558785,BB181316,KIAA0368,mKIAA0368        | 4.49E-29 | -3.31839  |
| AV244175  | AI158848                                             | 4.38E-06 | -2.1808   |
| AI118064  | AI118064,AW742785                                    | 0.00006  | -2.28502  |
| AK009866  | Ahnak,DY6,AA589382                                   | 0.00003  | -4.01653  |
| AK005060  | Agxt2l1,AI195447,1300019H02Rik                       | 0.00001  | -2.55763  |
| BB487712  | Agtpbp1,pcd,Nna1,                                    | 5.44E-07 | -5.71115  |
| BB758649  | Agpat5,D8ErtD319e,1110013A05Rik                      | 3.29E-08 | -1.72685  |
| AK010891  | Agpat2,BSCL,BSCL1                                    | 0.00016  | -5.42063  |
| BB524140  | Agpat1,1-AGP,1-AGPAT,AW047140                        | 0.00082  | -2.35677  |
| BB006088  | Agl,C77197,AI850929                                  | 0        | -8.9201   |
| AV052058  | Aga,AW060726                                         | 1.02E-11 | -1.78223  |
| AW546149  | Afg3l2,AW260507,2310036I02Rik                        | 1.07E-08 | -1.61531  |
| NM_007421 | Adssl1,Adss,Adss1,AI528595                           | 1.67E-37 | -9.87749  |
| NM_009634 | Adsl                                                 | 0        | -4.13248  |
| AF333028  | Adrbk1,GRK2,Bark-1,Adrbk-1,betaARK1                  | 0.00002  | -2.02835  |
| BB224790  | Adrb3,Adrb-3                                         | 0.00092  | -8.35777  |
| AV083350  | Adrb2,Badm,Gpcr7,Adrb-2                              | 1.19E-06 | -2.54497  |
| NM_054088 | Adpn                                                 | 6.88E-09 | -5.22833  |
| BG311385  | Adora2a,A2aR,A2AAR                                   | 0.00097  | -5.68403  |
| NM_013459 | Adn,DF,factor D                                      | 3.01E-27 | -11.40028 |
| BB559878  | Adk,AK,MGC6593,AI255373                              | 0        | -4.43837  |
| BG074607  | Adipor2,ADCR2,Paqr2,AI115388,                        | 1.39E-08 | -2.3872   |
| BC026584  | Adhfe1,Adh8,AI043035,6330565B14Rik                   | 1.55E-28 | -52.623   |
| BC013477  | Adh1,Adh-1,ADH-AA,Adh-1e,Adh-1t,Adh-3e,Adh1-e,       | 5.22E-38 | -14.79924 |
| AK013587  | Adcyap1r1,PAC1,PAC1R,AI846590,PACAP1-R,2900024I10Rik | 0.00086  | -3.3452   |
| BB795229  | Adcy9,mKIAA0520                                      | 3.33E-33 | -3.77677  |
| BE952286  | Adcy5,AC5,AW121902                                   | 0.00037  | -4.90408  |
| AK016299  | Adal,MGC62428,MGC63264,4930578F03Rik                 | 3.83E-07 | -1.54541  |
| BI730288  | Acyp2,2310004B09Rik                                  | 1.12E-30 | -4.24091  |
| NM_025421 | Acyp1,AI325944,1110039O14Rik                         | 1.87E-28 | -4.10122  |
| BQ043509  | Acvr1b,SKR2,ActRIB,ActR-IB,Acvrlk4,6820432J04        | 6.92E-11 | -3.31948  |
| NM_013456 | Actn3                                                | 2.99E-13 | -7.82062  |
| NM_007393 | Actb,Actx,beta-actin,E430023M04Rik                   | 3.42E-08 | -1.72615  |
| NM_019811 | Acss2,ACAS,Acs1,Acas1,Acas2,AceCS1,1110017C11Rik     | 1.06E-07 | -2.89411  |
| BI413218  | AcsI1,Acs,Acas,FACS,Acas1,Faci2                      | 1.07E-06 | -7.42807  |
| AB034914  | Acox1,AOX,AI042784,D130055E20Rik                     | 0.00003  | -2.05473  |
| AU019938  | Aco2,Aco3,Aco-2,D10Wsu183e                           | 0        | -3.18521  |
| BF122715  | Acn9,0610005M07Rik,4933430A16Rik                     | 5.84E-25 | -3.19813  |
| AK002470  | Acbd6,MGC106946,0610010G04Rik,2610100E10Rik          | 1.74E-13 | -2.17029  |
| AV148646  | Acat2,Tcp-1x,AW742799,Tcp1-rs1                       | 1.59E-35 | -2.14693  |
| BG070487  | Acat1,Acat,6330585C21Rik                             | 7.48E-34 | -3.04813  |
| BC026559  | Acadvl,vlcad                                         | 1.99E-06 | -2.96705  |
| BF228057  | Acadsb,BB066609,1300003O09Rik                        | 4.33E-13 | -1.93706  |
| NM_007383 | Acads,Bcd1,SCAD,Bcd-1,AI196007                       | 0.0007   | -3.38831  |
| NM_007382 | Acadm,MCAD,AU018656                                  | 7.98E-23 | -3.01368  |
| BB728073  | Acadl,LCAD,C79855,AA960361,AU018452                  | 2.03E-12 | -1.64377  |
| AV235115  | Acad9,NPD002,4732402K02,2600017P15Rik,C630012L17Rik  | 0.00006  | -1.8321   |
| AK010568  | Acad10,2410021P16Rik                                 | 0.00063  | -2.38516  |
| BC022940  | Acacb,Acc2,Accb,AI597064,AW743042                    | 3.46E-16 | -30.53787 |
| BG921646  | Acaca,Acac,Acc1,Gm738                                | 2.46E-10 | -3.18207  |
| BB718075  | Acaa2,AI255831,AI265397,D18ErtD240e,0610011L04Rik    | 4.55E-16 | -7.27169  |
| NM_130864 | Acaa1a,PTL,Acaa,Acaa1,MGC7090,D9ErtD25e              | 0.00056  | -1.86754  |

|           |                                                           |          |           |
|-----------|-----------------------------------------------------------|----------|-----------|
| BB336053  | Ablim2,AI606905,C230091L11                                | 0.00047  | -4.43635  |
| AK004244  | Abhd11,Wbscr21,1110054D16Rik,A630008N09Rik                | 2.56E-18 | -3.33771  |
| NM_021304 | Abhd1,LABH1,LABH-1                                        | 0.00059  | -2.19714  |
| AW456685  | Abcd2,ALDR,ABC39,ALDL1,ALDRP                              | 0.00008  | -9.10563  |
| BG791642  | Abcc9,Sur2,SUR2A,SUR2B,AI414027,AI449286                  | 4.38E-12 | -5.4257   |
| BM119407  | Abcb7,Abc7,AA517758,AU019072                              | 0        | -3.0303   |
| NM_023732 | Abcb6,1200005B17Rik                                       | 0.00005  | -1.51296  |
| NM_008830 | Abcb4,Mdr2,Pgy2,Pgy-2,mdr-2                               | 2.76E-20 | -7.71479  |
| AW046072  | Abca9,D630040K07Rik                                       | 0.00005  | -2.23797  |
| AF213393  | Abca8b,Abca8                                              | 0.00003  | -2.3734   |
| BC026496  | Abca8a                                                    | 8.92E-10 | -2.70437  |
| AB056443  | AB056442,mOAT6-L,mOAT6-S                                  | 0.00007  | -3.43212  |
| AK013111  | Aasdhpt,LYS2,                                             | 0.00013  | -1.55046  |
| AV369935  | Aadac1,CPO-BP,B230106I24Rik                               | 0.00016  | -1.79583  |
| C76423    | AA536749,RIP3,                                            | 2.48E-10 | -2.99865  |
| BG063170  | AA407881                                                  | 7.85E-18 | -2.7785   |
| BB447764  | A930035J23Rik,AU014659                                    | 4.33E-07 | -1.67495  |
| AI426503  | A930031D07Rik,AI850289,A230072B04                         | 0.00002  | -12.74329 |
| AK020898  | A930028C08Rik                                             | 0.00017  | -4.72954  |
| AV359781  | A930016D02Rik,MGC118429                                   | 9.22E-07 | -3.3182   |
| AV009179  | A930005H10Rik                                             | 1.75E-10 | -3.78348  |
| BM246522  | A930001N09Rik                                             | 0.00056  | -1.53703  |
| BB360713  | A730024A03Rik,AI838773                                    | 0.00002  | -1.97262  |
| BB360886  | A730009E18Rik                                             | 1.22E-11 | -4.76919  |
| AI790538  | A530016O06Rik,AI790538                                    | 2.68E-07 | -2.08949  |
| BC005730  | A330049M08Rik                                             | 4.49E-08 | -4.57189  |
| BQ176713  | A2bp1,A2bp,fox-1,Hrnbp1                                   | 0        | -8.46707  |
| BB153043  | A230061C15Rik                                             | 0.00029  | -1.84438  |
| BI111848  | A130092J06Rik                                             | 0.0001   | -2.16955  |
| AA673177  | A030007L17Rik,AA673177                                    | 5.97E-12 | -2.75569  |
| BB149729  | A030001D16Rik                                             | 1.50E-07 | -16.34188 |
| BB008528  | 9930021J17Rik                                             | 1.09E-13 | -6.92418  |
| BE457750  | 9830160G03Rik                                             | 0        | -15.51538 |
| BM247060  | 9630058J23Rik,MGC31547                                    | 6.25E-09 | -2.53433  |
| BB276950  | 9630055N22Rik,FLVCR                                       | 6.87E-43 | -2.56369  |
| BB128741  | 9630033F20Rik,C79710,C85509,AA793651,AI595337             | 0        | -13.41368 |
| BB438526  | 9630025H16Rik                                             | 1.82E-19 | -3.47287  |
| AK020529  | 9430099H24Rik                                             | 0.00004  | -4.03308  |
| BC024334  | 9430083G14Rik                                             | 1.18E-23 | -1.66621  |
| BB235927  | 9430063L05Rik,C87016,KIAA0477,mKIAA0454,4732458A06Rik     | 0.00005  | -2.09223  |
| AV228487  | 9430016H08Rik,C78988,AA409999                             | 0.00033  | -3.35346  |
| BB527078  | 9330186A19Rik,cg003,13CDNA73,AI462658,KIAA4143,           | 1.41E-41 | -2.64904  |
| AK020387  | 9330179C17Rik                                             | 0.00006  | -4.2066   |
| AV328072  | 9330159F19Rik                                             | 1.42E-26 | -4.38268  |
| BB078068  | 9330151E16Rik,Gm2,RP23-327G1.2                            | 0.00034  | -2.58706  |
| BG076134  | 9330120H11Rik                                             | 1.36E-07 | -2.06304  |
| BC023401  | 9130404D08Rik,C77863,C79014,KIAA0892,mKIAA0892            | 3.62E-10 | -1.87639  |
| BB424872  | 9130227C08Rik,AI605259,mKIAA0323,6330555F21,2310014G06Rik | 0.00005  | -8.99112  |
| AV376830  | 9130217G22Rik                                             | 0        | -14.08031 |
| AI881989  | 9130017A15Rik,TA-PP2C,AA672638,AI848390                   | 3.51E-14 | -3.29842  |
| NM_134072 | 9030611N15Rik,Akr1c14,AW557061                            | 0.00068  | -9.41116  |
| AV369969  | 9030204A07Rik                                             | 1.56E-10 | -1.56351  |
| AK020241  | 9030201C23Rik                                             | 0.00041  | -4.49269  |
| BQ175875  | 9030023J02Rik                                             | 5.35E-10 | -3.03645  |
| AK018397  | 8430408J07Rik                                             | 6.34E-06 | -1.73001  |
| BB040330  | 8430406I07Rik,AI426476                                    | 0.00089  | -1.88082  |
| AV363799  | 8030431A06Rik                                             | 1.61E-06 | -6.53346  |
| BB053380  | 6720462K09Rik                                             | 1.50E-14 | -1.82295  |
| BF011349  | 6620401M08Rik,1700006C13Rik                               | 3.38E-10 | -3.11982  |
| BF011349  | 6620401M08Rik,1700006C13Rik                               | 0        | -8.6067   |
| AK018322  | 6530404N21Rik,AI452315,AW060440,C10orf59,2810449D17Rik    | 9.67E-08 | -3.91338  |
| BB279146  | 6430704N06                                                | 1.61E-19 | -15.07004 |
| AV347367  | 6430601A21Rik                                             | 1.05E-08 | -1.96284  |
| AV342060  | 6430571L13Rik                                             | 5.61E-45 | -41.89606 |
| BB296225  | 6430510M02Rik                                             | 0.00002  | -3.23129  |
| BB667858  | 6330578E17Rik,1700001A24Rik                               | 0.00001  | -2.54138  |

|           |                                                         |          |           |
|-----------|---------------------------------------------------------|----------|-----------|
| AV330057  | 6330509M05Rik,AI450287                                  | 0.00003  | -3.08043  |
| AV327187  | 6330417G04Rik,AW048350                                  | 3.46E-07 | -6.09536  |
| AK018153  | 6330409N04Rik                                           | 3.12E-29 | -3.24679  |
| BB126127  | 6030458C11Rik,MGC118638                                 | 1.26E-07 | -1.73509  |
| AK003339  | 6030457N17Rik                                           | 0.00001  | -1.64445  |
| AV321994  | 6030439D06Rik                                           | 6.70E-18 | -20.88294 |
| AV380797  | 5930437A14Rik                                           | 0.00012  | -4.08158  |
| AI662241  | 5930418K15Rik,mKIAA1423                                 | 0.00063  | -3.87038  |
| BB223379  | 5830472M02Rik,3110080A02Rik                             | 8.04E-10 | -5.78906  |
| BQ173965  | 5830457H20Rik                                           | 1.61E-09 | -2.03248  |
| BB030412  | 5830454D03Rik                                           | 5.33E-14 | -2.33326  |
| AI553531  | 5830446M03Rik,AI181014,AU020769                         | 0.00014  | -2.25473  |
| BC002200  | 5830417C01Rik,DKFZp586C1019                             | 1.84E-32 | -1.89071  |
| BC027051  | 5830415L20Rik,2900022K02Rik                             | 0.0005   | -1.50981  |
| AV263881  | 5830411E10Rik,Nabp1,                                    | 0.00003  | -3.80647  |
| AK017917  | 5830410O09Rik                                           | 3.09E-06 | -4.73171  |
| BB005022  | 5830404H04Rik,AI314146,AI449533,BF168443,KIAA4045       | 0        | -11.17937 |
| BI737125  | 5730557B15Rik,0610012A05Rik                             | 2.51E-11 | -8.30222  |
| AK017741  | 5730499H23Rik                                           | 0.00004  | -2.03482  |
| AK017706  | 5730480H06Rik                                           | 0.00001  | -2.38259  |
| AI790341  | 5730472N09Rik,R74766,C9orf54,AA408683,AI790341          | 2.52E-06 | -1.91714  |
| AK017688  | 5730469M10Rik,AU040822                                  | 3.67E-10 | -8.9139   |
| BI108098  | 5730455P16Rik,RP23-252E4.2                              | 4.68E-10 | -2.14832  |
| BQ031255  | 5730439E10Rik,AI987948                                  | 5.07E-24 | -3.82     |
| BC011293  | 5730438N18Rik,MGC4399                                   | 3.97E-19 | -2.73563  |
| BC019420  | 5730437N04Rik,1110008A10Rik,2310046K16Rik               | 2.78E-09 | -2.3251   |
| AK017499  | 5730405O12Rik                                           | 0.00022  | -1.67491  |
| AK014507  | 5730405I09Rik,1700025H17Rik,3110050L10Rik,4631402G10Rik | 0.00079  | -2.10843  |
| NM_025670 | 5730403B10Rik,AU018521,AW742692                         | 5.89E-24 | -2.47278  |
| BB463553  | 5430433E21Rik                                           | 0.00027  | -4.6633   |
| AA590213  | 5430420P03Rik,Plmp,mDLP1                                | 2.63E-14 | -4.72349  |
| BB519768  | 5430420E18Rik                                           | 0.00002  | -1.70731  |
| BB224233  | 5430416O09Rik,AI481365                                  | 0.00013  | -3.2821   |
| AK017297  | 5430411K18Rik,AI661957,AW456499,mKIAA1632,4732475F16    | 3.04E-18 | -2.34571  |
| BC019948  | 5430405G24Rik,AU018890,mKIAA0553                        | 0.0003   | -1.50375  |
| BQ031101  | 5330431N19Rik                                           | 0.00013  | -1.55062  |
| BB021589  | 5330420D20Rik,Ddo,AI467244,5730402C02Rik                | 0        | -11.87894 |
| AK017242  | 5330417H12Rik                                           | 1.84E-09 | -7.15872  |
| BC023501  | 5330408N05Rik,KIAA1800,mKIAA1800                        | 8.12E-08 | -2.03119  |
| BC016597  | 5230400G24Rik,AI314724                                  | 3.58E-09 | -1.71904  |
| AK010168  | 5033425B17Rik,Nifie14,2010004E11Rik                     | 0        | -2.7815   |
| AK018199  | 5033417F24Rik,6330419D11Rik                             | 0.00009  | -2.77515  |
| BI408317  | 5031439G07Rik,AW554572,mKIAA0930                        | 0.00089  | -1.5359   |
| BB385113  | 5031434O11Rik,AI481280                                  | 1.18E-06 | -2.70365  |
| AJ404329  | 4933439F18Rik,RP23-135F6.5                              | 0.00008  | -1.65767  |
| AK017054  | 4933434G05Rik                                           | 0.00035  | -3.44838  |
| NM_025762 | 4933434E20Rik,NICE-3,NS5ATP4,AI462154,5730552F22Rik     | 8.75E-07 | -1.52822  |
| BB446073  | 4933425A18Rik,C80494                                    | 0.00062  | -1.92726  |
| AK016884  | 4933424C08Rik                                           | 0.00019  | -2.25356  |
| AV300264  | 4933408F15                                              | 3.50E-08 | -5.79207  |
| BM120298  | 4933403F05Rik,AA987140,AV134576,AW491926,MGC48232       | 0.00024  | -1.99718  |
| BB315720  | 4932416N17Rik,AW742259,KIAA0350,mKIAA0350               | 0.00035  | -2.63277  |
| AV273867  | 4932414K18Rik                                           | 7.37E-27 | -1.68725  |
| AK016424  | 4931402H11Rik                                           | 0.00002  | -3.92092  |
| AK005778  | 4930578I06Rik,AI429111                                  | 0.00051  | -3.85648  |
| BF019849  | 4930577N17Rik                                           | 0.0003   | -4.56009  |
| AK019739  | 4930544N03Rik                                           | 9.61E-08 | -4.0835   |
| AI666321  | 4930543C13Rik                                           | 0.00016  | -1.81217  |
| AK016020  | 4930542D17Rik                                           | 0.00062  | -2.35371  |
| NM_133798 | 4930539P14Rik,C85658                                    | 0.00012  | -2.86255  |
| AK015927  | 4930528G23Rik                                           | 0.00001  | -3.8821   |
| AK015926  | 4930528G09Rik                                           | 3.85E-12 | -12.55828 |
| AK015848  | 4930519P11Rik                                           | 0.00036  | -2.85948  |
| AK005645  | 4930517K11Rik,RPL39L                                    | 7.56E-06 | -3.61197  |
| BE980189  | 4930506M07Rik,KIAA1598,mKIAA1598                        | 0.00096  | -2.7482   |
| AK015661  | 4930500G05Rik                                           | 0.00038  | -6.26871  |

|           |                                                    |          |           |
|-----------|----------------------------------------------------|----------|-----------|
| BC021522  | 4930469P12Rik,Ghiso,AL022899                       | 9.55E-40 | -2.73873  |
| BG071611  | 4930461P20Rik,9930116P15Rik                        | 2.17E-12 | -2.78128  |
| BC020029  | 4930453N24Rik,AI649104                             | 2.40E-14 | -1.85577  |
| AK005798  | 4930448K20Rik,1700009K09Rik                        | 3.20E-08 | -2.57809  |
| AK019598  | 4930435F05Rik                                      | 0.00077  | -3.13061  |
| BM245060  | 4930431H11Rik                                      | 1.17E-07 | -2.45633  |
| BG073646  | 4930430F08Rik,AW551239,4930571E09Rik,A730088G13Rik | 0.00089  | -1.58487  |
| AK015083  | 4930404J24Rik,1110065L10Rik,2310004B22Rik          | 5.08E-08 | -2.09238  |
| BB079116  | 4930402E16Rik,AU018056,mKIAA1990                   | 0.00002  | -2.13615  |
| BB795572  | 4921517B04Rik,C630030B20,1110049N09Rik             | 1.82E-18 | -3.72224  |
| AV281687  | 4921507P07Rik,TISP74                               | 2.63E-06 | -2.8903   |
| NM_133797 | 4833439L19Rik,C81457,4930558H15Rik                 | 0        | -2.18662  |
| AV334098  | 4833424O15Rik                                      | 0.00023  | -2.58583  |
| AV249898  | 4833419K08Rik                                      | 0        | -57.52935 |
| AV026232  | 4832428D23Rik,Gm991                                | 5.87E-16 | -37.77966 |
| BC021511  | 4732486I23Rik,AI502974                             | 0.00073  | -1.71925  |
| AV119970  | 4732479N06Rik                                      | 1.13E-12 | -2.2423   |
| BB027848  | 4732466D17Rik,AI098026                             | 0.00006  | -4.43265  |
| BQ174442  | 4732416N19Rik                                      | 2.46E-14 | -3.36087  |
| BQ033255  | 4633402N23Rik,AA114801                             | 7.26E-24 | -1.99334  |
| AK019501  | 4632418H02Rik                                      | 0.00011  | -2.48859  |
| AK018605  | 4631408O11Rik                                      | 6.64E-10 | -2.85417  |
| AW488762  | 4432406C05Rik,AI648175,AW210586,2810440M13Rik      | 0.00002  | -2.30192  |
| AK014378  | 3300002P13Rik                                      | 6.22E-15 | -3.71501  |
| AV171622  | 3300001H21Rik,Aam-B,2210414H16Rik                  | 1.86E-12 | -4.08913  |
| BC028766  | 3300001G02Rik,AL033324,C16ORF33                    | 0.00002  | -4.81203  |
| BF140684  | 3222402P14Rik,MGC29057,A730042E07                  | 2.20E-16 | -3.31417  |
| AV317245  | 3110057O12Rik,AI645591,4732404H23,2310068E01Rik    | 0.00001  | -3.19345  |
| BB333439  | 3110056O03Rik,AW550292                             | 0.00004  | -2.33685  |
| AV158652  | 3110021A11Rik                                      | 7.76E-11 | -4.47589  |
| AK013998  | 3110005G23Rik                                      | 0.00007  | -2.66724  |
| BM234253  | 3110004L20Rik                                      | 0.00008  | -4.52641  |
| BE915283  | 3110001D03Rik,1700027K24Rik,RP24-200F10.1          | 4.54E-09 | -1.71444  |
| AK013857  | 3000002C10Rik                                      | 0.00001  | -2.08317  |
| BC025937  | 2900084M01Rik,MGC37808                             | 3.81E-10 | -4.19128  |
| AV230414  | 2900060K15Rik                                      | 0.00058  | -4.37564  |
| BC003957  | 2900046G09Rik                                      | 0.00014  | -6.20319  |
| AK013631  | 2900041A09Rik,Tppp,AI849835                        | 6.02E-06 | -5.28104  |
| AK013580  | 2900024C23Rik,AI315274                             | 4.09E-18 | -3.39243  |
| AA216953  | 2900016G23Rik                                      | 5.26E-06 | -1.7484   |
| AK013525  | 2900011F02Rik                                      | 0.00094  | -3.55909  |
| AV046927  | 2900010M23Rik                                      | 1.61E-16 | -2.01887  |
| AK011824  | 2900006F19Rik,1110033L15Rik,2610107G07Rik          | 7.57E-11 | -10.57605 |
| BC024461  | 2900006B13Rik,RP23-79E13.3                         | 1.85E-35 | -3.29002  |
| AV150162  | 2900002J02Rik                                      | 3.72E-07 | -10.62001 |
| BB520487  | 2900002H16Rik,FLJ39378,6330559I19Rik               | 0.00025  | -1.93738  |
| BC005638  | 2810453I06Rik,Sipar,AW047776,1500026F15Rik         | 0.00002  | -1.62097  |
| AV225967  | 2810439K08Rik,AW319712                             | 6.27E-06 | -2.20412  |
| BC013800  | 2810432L12Rik,AI835809,9330170P15Rik               | 0        | -2.94861  |
| AK018444  | 2810429O05Rik,MGC36863,D12Erttd482e,8430427C03Rik  | 7.32E-09 | -6.19823  |
| NM_025577 | 2810428I15Rik                                      | 5.27E-07 | -1.9221   |
| AK013166  | 2810426N06Rik,AI256342,AI605193                    | 0.00078  | -1.56639  |
| AV024565  | 2810423E13Rik,AI836898                             | 1.25E-15 | -3.48091  |
| AK013137  | 2810422O20Rik,C78571                               | 0.00088  | -1.78293  |
| AK013135  | 2810422J05Rik,C78305,0610030B01Rik                 | 0.00005  | -1.98921  |
| AK013131  | 2810422B04Rik,AU045708,2610034F17Rik               | 9.32E-30 | -2.3664   |
| BB108987  | 2810421I24Rik                                      | 2.88E-12 | -2.38203  |
| BB667085  | 2810416G20Rik                                      | 3.89E-08 | -6.67982  |
| BC002240  | 2810410M20Rik,DPY30,C87842                         | 3.47E-11 | -1.67207  |
| AK013022  | 2810407C02Rik,SelT,5730408P04Rik                   | 0        | -1.73939  |
| AI836168  | 2810405K02Rik,AI836168                             | 5.15E-26 | -5.75696  |
| BB363943  | 2810055G20Rik,D730043B02Rik                        | 0.00049  | -2.56944  |
| AK012776  | 2810021G02Rik                                      | 4.92E-08 | -1.74249  |
| AW061011  | 2810012H18Rik,AA536681,AA960498,AW061011           | 5.42E-18 | -2.21008  |
| AK002873  | 2810002N01Rik,1700081D05Rik                        | 2.60E-39 | -2.30197  |
| AK012621  | 2700097O09Rik,AW552125                             | 0.00005  | -2.05449  |

|           |                                                           |          |           |
|-----------|-----------------------------------------------------------|----------|-----------|
| AV030118  | 2700089E24Rik,AI662692                                    | 2.36E-09 | -2.02904  |
| AK012852  | 2700088M22Rik, Madp-1                                     | 2.37E-39 | -2.50079  |
| AK020725  | 2700046A07Rik,A330042I05Rik                               | 0.00052  | -3.12747  |
| NM_026202 | 2610529H08Rik,C3orf6,AW048328                             | 6.50E-06 | -1.68724  |
| AK019979  | 2610528E23Rik,AV099812,AV122629,                          | 0        | -7.33237  |
| BC011109  | 2610511E22Rik                                             | 1.95E-06 | -1.75504  |
| AK012087  | 2610510B01Rik,C21orf5,AI503246,mKIAA0933,0610038M01Rik    | 0.00016  | -1.75721  |
| BG065294  | 2610507B11Rik,E1,AU022687                                 | 1.41E-09 | -1.58384  |
| NM_026519 | 2610318K02Rik                                             | 1.69E-06 | -1.53245  |
| AI506568  | 2610306H15Rik                                             | 0.00043  | -2.03692  |
| BB304715  | 2610304G08Rik,2810446G03Rik                               | 1.39E-12 | -1.99792  |
| BC027564  | 2610209M04Rik,Ry1,AI449063,AU022368                       | 9.58E-29 | -1.75354  |
| AK013127  | 2610209A20Rik                                             | 0.00033  | -1.69253  |
| AB040489  | 2610204L23Rik,asp4                                        | 8.34E-22 | -1.60661  |
| AK009389  | 2610200G18Rik,2810426C15Rik                               | 2.74E-10 | -3.32785  |
| AK011776  | 2610044O15Rik                                             | 6.24E-06 | -1.88959  |
| AI266964  | 2610042O14Rik,C87389,AI266964                             | 8.60E-06 | -1.88464  |
| AK011692  | 2610036D13Rik,AI449463                                    | 1.63E-06 | -2.50422  |
| AK011611  | 2610029I01Rik                                             | 0.00004  | -1.74723  |
| AK003713  | 2610022G08Rik,AI847956                                    | 9.77E-11 | -3.54812  |
| AA790871  | 2610019N19Rik                                             | 3.66E-24 | -2.04731  |
| AK011462  | 2610019F03Rik                                             | 0.00001  | -3.31829  |
| AV006771  | 2600009E05Rik,AI326138,1110001I20Rik                      | 3.49E-06 | -2.42991  |
| AK010986  | 2510019K15Rik                                             | 0.00033  | -1.95504  |
| NM_026527 | 2510006C20Rik,RP23-20N14.6                                | 0        | -4.96821  |
| NM_026526 | 2510005D08Rik,AW045965                                    | 3.42E-08 | -1.6192   |
| BQ174647  | 2510003E04Rik,MGC107132,mKIAA1279,0710007C18Rik           | 0.00072  | -1.53167  |
| BG070940  | 2500002B13Rik                                             | 0.00003  | -2.6488   |
| BB787289  | 2410195B05Rik,AA617402,AW536475,MGC117832                 | 4.85E-06 | -2.2707   |
| AI480750  | 2410166I05Rik,AI480750                                    | 3.80E-16 | -1.83811  |
| BI153133  | 2410129H14Rik,AI120158                                    | 0.0001   | -1.55269  |
| AV302436  | 2410127L17Rik                                             | 2.81E-18 | -5.0703   |
| AK010524  | 2410017I17Rik                                             | 0.00004  | -2.57532  |
| AK010472  | 2410012H22Rik,MGC130274,RP23-330N10.3                     | 3.40E-11 | -2.01504  |
| BB348448  | 2410012C07Rik,VKIND,B830014K08Rik                         | 0.00004  | -3.46975  |
| BB115225  | 2410005O16Rik,AI449062,                                   | 0.00036  | -2.76226  |
| NM_025555 | 2410004B18Rik,4930572C24Rik                               | 4.62E-44 | -1.60627  |
| NM_018888 | 2410003P15Rik,Bfzb,Bfzp,mbFZb,2310079L17Rik,3110038N19Rik | 0.00078  | -2.41439  |
| BF300229  | 2410003K15Rik                                             | 0        | -3.8636   |
| BB035728  | 2410002O22Rik,AI451892,AU017229,2610524F24Rik             | 1.04E-07 | -1.57525  |
| AA261399  | 2400009B08Rik                                             | 3.26E-08 | -6.74249  |
| NM_021329 | 2400006H24Rik,Mog1,Rangnf,MGC107268,RP23-396M19.8         | 7.29E-08 | -2.98233  |
| AV017653  | 2400002F11Rik,MGC41042                                    | 5.79E-10 | -1.67323  |
| BI152383  | 2310079P12Rik,L55,AF006998,RP23-268K22.3                  | 5.23E-12 | -1.57895  |
| BB717485  | 2310076L09Rik,PAT-1,AI415325,AW109675                     | 3.06E-08 | -19.14464 |
| BC026740  | 2310075G12Rik,1110014L05Rik                               | 3.26E-10 | -4.38533  |
| NM_027343 | 2310066I10Rik,AI481039                                    | 0.00042  | -7.89882  |
| AK010044  | 2310065F04Rik                                             | 3.44E-25 | -64.03367 |
| BB379386  | 2310061I04Rik,MGC117734                                   | 0        | -4.37784  |
| AW045976  | 2310061C15Rik,DC13,1110046L09Rik                          | 0.00026  | -1.69902  |
| BC010826  | 2310056P07Rik                                             | 2.98E-14 | -1.57229  |
| AW488885  | 2310051E17Rik                                             | 1.46E-07 | -2.0444   |
| AK009897  | 2310050B05Rik                                             | 4.31E-40 | -12.9132  |
| AW048687  | 2310047D07Rik                                             | 3.26E-12 | -9.6881   |
| AK009836  | 2310046A06Rik,AI931782,MGC107700                          | 1.53E-13 | -3.52995  |
| AV364387  | 2310045N14Rik                                             | 1.21E-07 | -2.63067  |
| AK009800  | 2310044G17Rik,AI842544,AI853744,mKIAA1737                 | 2.13E-14 | -1.97899  |
| BB667295  | 2310044D20Rik                                             | 3.44E-14 | -2.10157  |
| AK018202  | 2310043N10Rik                                             | 3.76E-08 | -2.23233  |
| AK009747  | 2310042D19Rik                                             | 5.51E-18 | -22.20075 |
| BG795494  | 2310040G24Rik                                             | 0        | -35.6212  |
| NM_025966 | 2310039H08Rik                                             | 1.38E-41 | -2.23762  |
| AK009547  | 2310030N02Rik                                             | 8.27E-30 | -14.84962 |
| AV213597  | 2310030G09Rik                                             | 0.00059  | -1.93302  |
| AV209841  | 2310028O11Rik                                             | 5.36E-09 | -1.63354  |
| AK009941  | 2310022A10Rik                                             | 2.71E-18 | -2.43938  |

|           |                                                |          |           |
|-----------|------------------------------------------------|----------|-----------|
| W42220    | 2310016M24Rik,AA959804,MGC106475               | 1.08E-20 | -2.21433  |
| BC024580  | 2310016A09Rik                                  | 7.92E-21 | -11.00962 |
| AK009351  | 2310015B20Rik                                  | 0        | -7.84455  |
| AK009335  | 2310014F06Rik                                  | 7.17E-09 | -7.33005  |
| AK009281  | 2310010M20Rik                                  | 0        | -62.27506 |
| AK009264  | 2310010B21Rik,AW048587                         | 1.91E-07 | -1.70435  |
| AV004950  | 2310009A05Rik                                  | 0.00072  | -2.05679  |
| BQ176469  | 2310007O11Rik                                  | 0.00002  | -1.89962  |
| AK009207  | 2310007H09Rik                                  | 0.00003  | -6.36641  |
| AK009001  | 2310007F04Rik                                  | 4.50E-12 | -7.98912  |
| BB226589  | 2310005P05Rik,AI481005                         | 6.79E-08 | -4.18677  |
| AK004527  | 2310005O14Rik,C78387                           | 0        | -6.04951  |
| AK019906  | 2310005E10Rik,Akr1b10                          | 0        | -3.88321  |
| AK009123  | 2310003L22Rik                                  | 1.24E-30 | -4.43275  |
| AK009097  | 2310002L09Rik,AV083437,2310003M01Rik           | 5.60E-16 | -7.69136  |
| AK010048  | 2310002J21Rik,2610002B11Rik,4930560M04Rik      | 3.92E-09 | -2.66201  |
| AK009071  | 2310001K24Rik                                  | 3.04E-06 | -2.58345  |
| AI467545  | 2310001H13Rik,AI467545,mKIAA1042               | 3.16E-29 | -4.71226  |
| BB221125  | 2310001A20Rik,AI314817                         | 8.57E-06 | -1.65158  |
| AK009046  | 2300009A05Rik                                  | 4.31E-08 | -2.24233  |
| AK009016  | 2300003C06Rik,JP-45,2310032K21Rik              | 1.09E-06 | -3.61604  |
| BF318739  | 2210409M21Rik                                  | 6.49E-14 | -1.64431  |
| BC025858  | 2210021J22Rik                                  | 0.00044  | -2.27743  |
| AU021197  | 2210018M11Rik                                  | 0.00027  | -2.90493  |
| BM245369  | 2210015D19Rik,AI596465,1600028I17Rik           | 1.08E-07 | -3.15793  |
| AV288141  | 2010316F05Rik,RP23-92B18.3                     | 1.19E-06 | -1.79263  |
| NM_133839 | 2010311D03Rik,AI314967                         | 0.00068  | -1.5376   |
| BC012391  | 2010305A19Rik,AI451324                         | 1.54E-10 | -2.1369   |
| AK008567  | 2010110K16Rik,AI596001,2010312P05Rik           | 1.20E-08 | -2.23187  |
| AV069567  | 2010107H07Rik                                  | 0.00012  | -1.88542  |
| BC016267  | 2010106G01Rik,Sppl2A,C130089K23Rik             | 3.82E-23 | -1.89604  |
| NM_025946 | 2010100O12Rik,AI853864                         | 1.67E-23 | -1.58319  |
| BF585125  | 2010005J08Rik,AW060359                         | 0.0001   | -1.63695  |
| AK008077  | 2010003O02Rik                                  | 0.00005  | -4.17775  |
| AK007977  | 1810073N04Rik                                  | 8.46E-07 | -1.99648  |
| BG975168  | 1810063B05Rik,AI447995                         | 0        | -2.33562  |
| AA067702  | 1810060J02Rik,AU045683,AW555238,1700086G08Rik  | 5.22E-14 | -1.76897  |
| AV059466  | 1810058N15Rik                                  | 0.00042  | -2.46268  |
| AK007894  | 1810058I14Rik,C86051,mimitin                   | 7.59E-12 | -1.67021  |
| NM_025560 | 1810049H13Rik                                  | 1.68E-08 | -2.61362  |
| AV370537  | 1810044O22Rik,Cyb5m,AU015618                   | 0.00008  | -1.75147  |
| W41078    | 1810044D09Rik                                  | 7.29E-10 | -2.51148  |
| AV056885  | 1810043H04Rik                                  | 1.47E-09 | -1.81919  |
| NM_025962 | 1810037K07Rik                                  | 0        | -3.67985  |
| BG792484  | 1810030N24Rik,2810406B13Rik                    | 1.21E-29 | -2.48587  |
| BG069652  | 1810029B16Rik                                  | 1.00E-10 | -1.80899  |
| BG088666  | 1810027O10Rik,3110009M16Rik,RP23-422L16.23     | 2.52E-21 | -1.79364  |
| BB027373  | 1810026J23Rik                                  | 1.29E-06 | -1.66763  |
| BC021795  | 1810023F06Rik,ISG12(b2)                        | 0.00055  | -2.82754  |
| BF166756  | 1810020G14Rik,BB388670,MGC118423,1810055I05Rik | 2.63E-18 | -2.12127  |
| BB667677  | 1810020E01Rik                                  | 5.50E-24 | -3.14     |
| BC026557  | 1810020D17Rik,1810037D19Rik                    | 3.89E-13 | -2.28782  |
| AK007557  | 1810020C19Rik,1700108H04Rik                    | 0.00003  | -1.56425  |
| AK007494  | 1810014F10Rik                                  | 7.95E-38 | -4.36716  |
| AW985991  | 1810014B01Rik                                  | 3.61E-12 | -3.89217  |
| BM227762  | 1810013L24Rik,R74903,                          | 6.72E-08 | -1.51636  |
| C87702    | 1810013D10Rik,N28078                           | 5.12E-15 | -1.97223  |
| BM250236  | 1810012P15Rik                                  | 0.00001  | -4.36419  |
| NM_025457 | 1810008A14Rik                                  | 0.00007  | -1.72084  |
| NM_025308 | 1810007E14Rik,AA238765                         | 0.00035  | -2.36042  |
| BB211735  | 1700129L13Rik,AU019838                         | 4.75E-15 | -1.87305  |
| NM_026628 | 1700120K04Rik                                  | 0.0001   | -1.85348  |
| AK007198  | 1700113I22Rik,1110069E20Rik                    | 2.73E-35 | -3.86058  |
| BC025528  | 1700108L22Rik,AA690246,FLJ10378,MGC38253       | 3.45E-35 | -4.96569  |
| BG069192  | 1700106N22Rik                                  | 0.00062  | -3.74343  |
| BB104209  | 1700106J16Rik                                  | 4.61E-06 | -2.77495  |

|           |                                                         |          |           |
|-----------|---------------------------------------------------------|----------|-----------|
| AK018926  | 1700094C09Rik,MGC58425                                  | 0.00015  | -2.4829   |
| BB633562  | 1700066J03Rik                                           | 0.00061  | -2.71604  |
| AW557010  | 1700065A05Rik,AA420392                                  | 8.94E-09 | -1.85743  |
| AK006658  | 1700040I03Rik                                           | 0.00007  | -2.46494  |
| AK006645  | 1700039M15Rik                                           | 0.00082  | -6.06838  |
| AK006602  | 1700034M03Rik,BLM,C87205,mKIAA1861,8430415E05Rik        | 4.99E-16 | -1.92071  |
| AK012203  | 1700034H14Rik,2700002I20Rik                             | 1.00E-18 | -2.30543  |
| AW557527  | 1700025G04Rik,AV212693,2900042O04Rik                    | 3.70E-09 | -1.94641  |
| AK006309  | 1700024N20Rik,RIKEN cDNA 1700024N20 gene,1430477_s_at   | 8.44E-08 | -6.63875  |
| BC027007  | 1700022C21Rik,AI746295                                  | 6.54E-14 | -4.76384  |
| BC013506  | 1700021F05Rik                                           | 0        | -2.44748  |
| AK004510  | 1700020I14Rik,AI451541,AI585852,                        | 5.63E-23 | -1.99862  |
| BC019205  | 1700020C11Rik,Mtp18,AV005788,RP23-81P12.9,2610507A21Rik | 0        | -11.3474  |
| AV266242  | 1700016C15Rik                                           | 0.00004  | -3.65374  |
| BC019967  | 1700013L23Rik                                           | 0.00001  | -4.53367  |
| AK005950  | 1700013G20Rik                                           | 6.90E-27 | -5.40886  |
| W59405    | 1700012G19Rik,AI481330,MGC103027                        | 0.00004  | -2.4103   |
| AK005786  | 1700008P02Rik                                           | 0.0006   | -3.18652  |
| AK005765  | 1700008G05Rik                                           | 0.00012  | -2.01251  |
| AV220213  | 1700003F17Rik                                           | 2.29E-06 | -2.10635  |
| NM_019975 | 1600020H07Rik,Hpcl                                      | 2.36E-09 | -2.14107  |
| AK005450  | 1600014C23Rik                                           | 0.00087  | -4.27672  |
| BC019834  | 1600014C10Rik,AI428873                                  | 0.00015  | -2.54965  |
| AK018782  | 1500034E06Rik,RP23-5O23.3                               | 4.36E-11 | -1.86137  |
| BG915677  | 1500032L24Rik,MGC106724                                 | 4.90E-08 | -1.55822  |
| BC019519  | 1500032H18Rik                                           | 9.04E-07 | -1.95451  |
| BC013640  | 1500032D16Rik                                           | 6.01E-39 | -2.58429  |
| BB391156  | 1500016O10Rik,AI413816,AW060769,MGC103222,A330104J06Rik | 0        | -25.1822  |
| AV154001  | 1500011K16Rik                                           | 0        | -4.07223  |
| AK005310  | 1500009M05Rik,AI848398,                                 | 3.01E-11 | -1.89938  |
| NM_025435 | 1500006O09Rik,Nif3I1bp1,9230101K24Rik                   | 1.20E-10 | -1.67104  |
| NM_033146 | 1500005A01Rik,Cgi112                                    | 1.48E-23 | -3.83537  |
| BF462791  | 1500004F05Rik                                           | 1.26E-11 | -3.71621  |
| AW556858  | 1500004A08Rik,Crkd,Hgfl,RP23-191E3.6                    | 0.00004  | -1.67447  |
| AK005121  | 1500002K03Rik                                           | 0.00028  | -1.91807  |
| BB251429  | 1500001A10Rik,mKIAA1853                                 | 0.00082  | -11.72058 |
| AK005048  | 1300018J18Rik,Selo                                      | 0.00065  | -2.08626  |
| NM_026183 | 1300013J15Rik,AI036982,RP23-451A6.3                     | 5.94E-32 | -9.05373  |
| BF018217  | 1300010F03Rik,AI957255,mKIAA0564,4932416F07Rik          | 3.72E-08 | -1.55196  |
| AK004884  | 1300003K24Rik,AU041262,mKIAA1002                        | 1.90E-14 | -1.95436  |
| AK004870  | 1300003B13Rik                                           | 0.00084  | -1.68985  |
| NM_025827 | 1300002A08Rik,Lonp,AU015403                             | 1.57E-06 | -1.53484  |
| AK004841  | 1300001I01Rik,mKIAA0664,RP23-194P5.1                    | 0.00025  | -3.32653  |
| BB222127  | 1200007D18Rik,MGC102406                                 | 2.99E-12 | -9.0586   |
| AV088109  | 1200007B05Rik,AI325987                                  | 4.69E-10 | -1.84249  |
| BC019364  | 1200006O19Rik,AI467579,lpla2(gamma)                     | 8.12E-09 | -1.53065  |
| BC006902  | 1200006F02Rik                                           | 0.00035  | -2.82962  |
| BC002238  | 1200003C05Rik,AI256468                                  | 0.00002  | -2.67666  |
| NM_138743 | 1190017O12Rik,C21orf51                                  | 4.14E-13 | -2.233    |
| BB783125  | 1110067I12Rik,MGC130183,MGC130184                       | 2.82E-17 | -4.3374   |
| BC019131  | 1110067D22Rik,A530071M23,RP23-455B19.1                  | 1.06E-19 | -2.64344  |
| AK016797  | 1110061L23Rik,4933413A04Rik                             | 1.16E-08 | -1.88469  |
| BF660249  | 1110059H15Rik,Znf650,AA409735,                          | 0.00026  | -1.67356  |
| NM_026503 | 1110058L19Rik,C6orf57,AI847425,1700001E18Rik            | 4.33E-29 | -2.43719  |
| BB513634  | 1110054M08Rik,AI481106                                  | 2.68E-16 | -10.68372 |
| BB537625  | 1110051M20Rik,MGC4707,AI586322,MGC40841,E130006N16Rik   | 0.00071  | -3.31418  |
| NM_025410 | 1110049G11Rik,Eso3,lba2                                 | 7.53E-06 | -1.62522  |
| BM898643  | 1110048D14Rik                                           | 1.81E-06 | -2.89649  |
| AK004153  | 1110038D17Rik                                           | 9.20E-08 | -2.74241  |
| BB609668  | 1110035M17Rik                                           | 0.00002  | -3.52049  |
| NM_023483 | 1110032A03Rik,c11orf1,4930500N06Rik                     | 6.81E-06 | -1.62331  |
| NM_025402 | 1110031I02Rik                                           | 6.12E-13 | -2.9342   |
| NM_024230 | 1110030K22Rik,CHASM                                     | 2.08E-13 | -3.83144  |
| AB054000  | 1110028A07Rik,Cg10671,AV010547,MGC129516,MGC129517      | 1.29E-12 | -13.16583 |
| BF681728  | 1110020P15Rik,AA960494,RP23-280J3.4                     | 8.95E-08 | -5.95186  |
| BB277742  | 1110020G09Rik,4933430B08Rik                             | 2.80E-45 | -4.3065   |

|           |                                                      |          |           |
|-----------|------------------------------------------------------|----------|-----------|
| BI737205  | 1110020A21Rik                                        | 6.14E-07 | -3.97975  |
| AK003783  | 1110018J23Rik,Al646761,2010003H22Rik                 | 5.85E-10 | -2.14116  |
| BE570477  | 1110014K08Rik,D030012E24Rik                          | 1.28E-08 | -1.80457  |
| AK003645  | 1110012N22Rik,MGC107698                              | 3.37E-06 | -6.96112  |
| BC024574  | 1110012L19Rik                                        | 7.75E-22 | -1.80658  |
| AV156568  | 1110007M04Rik,AW214064,3000003G13Rik                 | 3.30E-15 | -2.21029  |
| BG795169  | 1110007A06Rik,AJ237586,AW125795,MGC59617,MTA.D02.090 | 8.97E-09 | -1.60459  |
| BB477208  | 1110006I15Rik,C77652,AA958958                        | 6.87E-32 | -2.14605  |
| AK003497  | 1110006G14Rik                                        | 3.48E-19 | -10.21012 |
| BC026936  | 1110005A03Rik,4933424L15Rik                          | 2.75E-12 | -2.40854  |
| AV165159  | 1110004E09Rik                                        | 0.00048  | -1.85405  |
| AK003388  | 1110003O08Rik                                        | 0.00003  | -5.64974  |
| BB069531  | 1110003F05Rik                                        | 1.34E-07 | -1.93985  |
| BB701294  | 1110003E01Rik,MGC7185,1700127H04Rik,5430439C17Rik    | 0.00019  | -1.63243  |
| AK003325  | 1110002N22Rik,FLJ22729                               | 9.56E-22 | -2.92163  |
| AV012778  | 1110001P11Rik,Al120487,RP23-338M9.5                  | 0        | -31.98996 |
| NM_025363 | 1110001J03Rik                                        | 0        | -7.96111  |
| BB609468  | 1110001A16Rik                                        | 3.46E-14 | -2.31957  |
| BI525016  | 0910001L09Rik,AV006840                               | 6.92E-08 | -1.8181   |
| BG071645  | 0610040D20Rik,Ed1,mED1,c11orf5,2900052N06Rik         | 4.91E-09 | -1.69452  |
| BB775176  | 0610039N19Rik,MMT-7,C80029,RetSat                    | 1.24E-14 | -5.87168  |
| AV078077  | 0610038F07Rik,AA407634,AW049997,MGC61338             | 0.00002  | -1.64923  |
| BC011300  | 0610037P05Rik                                        | 1.34E-13 | -2.10399  |
| BG271102  | 0610031G08Rik                                        | 3.33E-11 | -14.31031 |
| BC021536  | 0610012G03Rik,Al839730                               | 7.12E-14 | -2.74252  |
| AK007178  | 0610012D17Rik,2410011K15Rik                          | 0.00053  | -1.70992  |
| AK002535  | 0610011F06Rik                                        | 6.60E-09 | -4.10475  |
| AV092359  | 0610010O12Rik                                        | 0.00085  | -2.01586  |
| AK002437  | 0610009O20Rik,2700004E22Rik                          | 3.50E-14 | -4.40883  |
| BE370605  | 0610009L18Rik                                        | 0        | -12.69272 |
| BC019516  | 0610009K11Rik,AV000801                               | 0.00048  | -1.78208  |
| AK016165  | 0610009I22Rik,4930557M15Rik,5730490M08Rik            | 1.22E-09 | -2.20276  |
| BF162362  | 0610009E20Rik,0610025L18Rik,RP23-263M10.8            | 1.54E-10 | -1.7652   |
| NM_025319 | 0610009B22Rik                                        | 1.80E-11 | -1.99799  |
| AK002320  | 0610008C08Rik,MGC130105,MGC130106,1110019O03Rik      | 0        | -5.61596  |
| BC003916  | 0610007P06Rik,I7Rn6,1110002N09Rik                    | 2.10E-26 | -2.34903  |
| BE689422  | 0610007L01Rik,AW557951,A930023A16Rik,G430067H08Rik   | 2.46E-25 | -2.01219  |
| NM_025791 | 0610006I08Rik                                        | 6.51E-06 | -1.75117  |

**Supplementary Table 2** Genes up- and down-regulated in BCC (>1.5 fold and P-value < 0.001)

| 1451 genes up-regulated in BCC (>1.5 fold and P-value < 0.001) |                                                       |          |             |
|----------------------------------------------------------------|-------------------------------------------------------|----------|-------------|
| Accession #                                                    | Sequence Name(s)                                      | P-value  | Fold Change |
| AK008144                                                       | Zwint,Zwint-1,D10ErtD749e,2010007E07Rik,2600001N01Rik | 0.00004  | 4.38846     |
| BG072903                                                       | Zranb1,Gm1956,Trabid,D7Wsu87e,9330160G10Rik           | 4.09E-07 | 1.69839     |
| BM221751                                                       | Znrf2,AU044205,MGC129274,MGC129275,                   | 0.00011  | 2.25865     |
| BC026751                                                       | Znhit1,ZNFN4A1,2700001K05Rik                          | 7.20E-09 | 2.55782     |
| BB832996                                                       | Zmynd11,2210402G22Rik                                 | 2.91E-20 | 1.55573     |
| AI326272                                                       | Zipro1,RU49,Zfp38,Zfp-38,CTfin51,Al326272             | 0.00001  | 2.04959     |
| BC019521                                                       | Zfyve21,C85416,AW558780,1110013H04Rik                 | 0.00015  | 2.28169     |
| NM_011767                                                      | Zfr,C920030H05Rik                                     | 0.00008  | 2.62838     |
| U62907                                                         | Zfp95,hKraba1,Al132486,Al326970                       | 0.00008  | 2.8785      |
| NM_011764                                                      | Zfp90,NK10,Zfp64,Zfp83,KRAB17,mKIAA1954,6430515L01Rik | 3.21E-06 | 4.99707     |
| BM230481                                                       | Zfp82,mszf3,KRAB16,A030010D05                         | 0.00032  | 2.42421     |
| NM_009564                                                      | Zfp64                                                 | 0.00001  | 3.59639     |
| BC003941                                                       | Zfp639,ZASC1,ANC-2H01,6230400O18Rik                   | 4.46E-09 | 2.19788     |
| BC022935                                                       | Zfp62,Al227021                                        | 8.98E-11 | 3.63169     |
| AV270881                                                       | Zfp597,Al462383,Al666357,MGC118564,4933407K12Rik      | 0.00039  | 1.51421     |
| BB668116                                                       | Zfp592,mKIAA0211,8430405N24,A730014M16Rik             | 6.59E-06 | 1.81265     |
| BC019790                                                       | Zfp566,mszf4,2700043M03Rik                            | 4.27E-19 | 6.70687     |



|           |                                                        |          |          |
|-----------|--------------------------------------------------------|----------|----------|
| BB404446  | Zfp532,mKIAA1629,C530030I18Rik                         | 0.00002  | 1.89899  |
| BM119467  | Zfp496,Nizp1,BC040205,MGC36538,D130067D09,RP23-210M6.6 | 0.00006  | 2.74004  |
| BI729900  | Zfp445,ZNF168,mszf29,mszf50,AW610627                   | 0.00006  | 2.37145  |
| BM227942  | Zfp422-rs1,AI842447,Krox-25-2,                         | 0.00007  | 2.32404  |
| BC004747  | Zfp386,Kzf1,KIAA4205,mKIAA4205                         | 9.76E-08 | 2.25112  |
| NM_009554 | Zfp37,Tzn,Zfp-37,AV042165                              | 0.00074  | 3.15776  |
| BB031791  | Zfp36I2,Brf2,ERF2,Tis11d                               | 7.43E-19 | 2.49393  |
| M58566    | Zfp36I1,Brf1,ERF1,cMG1,Berg36,TIS11b                   | 0.00068  | 1.57582  |
| BB818501  | Zfp364,AU042696,2610028E05Rik                          | 0.00051  | 1.74673  |
| NM_018759 | Zfp326,ZAN75,5730470H14Rik                             | 3.67E-06 | 1.99938  |
| BB476317  | Zfp319,AI225750,AI413472,KIAA1388,mKIAA1388            | 0.00009  | 3.36943  |
| NM_013705 | Zfp30,Zfp-30,2610306P15Rik                             | 1.05E-08 | 15.52919 |
| AV071650  | Zfp281,MGC7737,MGC70044                                | 6.19E-08 | 2.32387  |
| AK018372  | Zfp278,Mazr,PATZ,AI447519,8430401L15Rik                | 0.00001  | 2.11121  |
| BC019962  | Zfp275,DXPas8,DXBay20,DXHXS52,AI593314,5430431L06Rik   | 0.00075  | 1.75618  |
| AK018207  | Zfp262,MYM,CDIR,Znf262,                                | 0.00011  | 1.61065  |
| L36316    | Zfp260,Ozrf1,Zfp63,AI480997                            | 3.06E-17 | 4.16605  |
| AW987152  | Zfp217,Gm562,ZABC1,Znf217,AW987152,4933431C08Rik       | 0.00002  | 2.81792  |
| BC006693  | Zfp212,Znf212,mKIAA3011                                | 0.00003  | 1.76568  |
| BB622498  | Zfp207,Zep,8430401D15Rik                               | 0.00012  | 5.01538  |
| X98096    | Zfp148,BERF-1,BFCOL1,ZBP-89,                           | 1.70E-10 | 2.47205  |
| NM_009542 | Zfp101,AI316498,AI325003                               | 0.00003  | 1.74605  |
| BC013555  | Zcchc8,5730565F05Rik                                   | 1.18E-14 | 1.98844  |
| BM125518  | Zc3h7b,Gm627,Scrg3,Zc2h7b,mKIAA1031                    | 0.00005  | 2.689    |
| AV328883  | Zc3h11a,KIAA0663,Zc3hdc11a,                            | 0.00097  | 2.53761  |
| BB751546  | Zbtb20,HOF,DPZF,Oda8,ODA-8S,Zfp288,                    | 0.0001   | 3.07019  |
| BB703880  | Zbed3,AU018975,AU024588,0610037K01Rik,2610005H11Rik    | 0.00036  | 2.44796  |
| AV027921  | Ywhaz,AI596267,AL022924,AU020854,1110013I11Rik         | 8.28E-07 | 2.36408  |
| BB455932  | Ythdf2,HGRG8,NY-REN-2,9430020E02Rik                    | 1.69E-06 | 1.53326  |
| AI481820  | Ythdc2,BC037178                                        | 1.75E-11 | 1.87764  |
| BG069663  | Ypel2,RP23-188E9.1,E130113K08Rik                       | 0.00061  | 2.16514  |
| BC013620  | Ybx1,MSY1,Nsep1,C79409,mYB-1a,MGC118070,1700102N10Rik  | 4.99E-13 | 1.66151  |
| AV337591  | Xpr1,XR,Sxv,Rmc1,Syg1,Rmc-1                            | 0.00006  | 1.53576  |
| BC014727  | Wwtr1,TAZ,C78399,2310058J06Rik,2610021I22Rik           | 4.22E-07 | 1.56461  |
| NM_019573 | Wwox,WOX1,5330426P09Rik,9030416C10Rik                  | 0.00009  | 4.44875  |
| NM_030215 | Wrnip1,WHIP,Wrnip,4833444L21Rik                        | 3.92E-12 | 2.20613  |
| AV273409  | Wnt9a,Wnt14                                            | 0.00077  | 3.57608  |
| BC004048  | Wif1,AW107799                                          | 7.84E-07 | 6.42879  |
| BG075255  | Whsc2,NELFA,Whsc2h                                     | 0.00045  | 1.75478  |
| BB199080  | Wdr79,BC021790,MGC28622,RP23-56I20.3                   | 1.19E-06 | 3.57044  |
| NM_031392 | Wdr6                                                   | 0.00001  | 3.58916  |
| AK002371  | Wdr57,Prp8bp,0610009C03Rik                             | 1.75E-09 | 1.64647  |
| BB123403  | Wdr42a,H326,C76055,D1Ucla4,                            | 0.00054  | 1.52286  |
| AK004644  | Wdr1,D5Wsu185e                                         | 0.00004  | 1.63449  |
| BC007478  | Wbp5,AL024233                                          | 6.51E-10 | 1.61937  |
| C76969    | Waspip,WIP,AI115543,D2ErtD120e                         | 0.00083  | 2.10515  |
| BF466143  | Wasl,N-WASP,2900021I12Rik,3110031I02Rik                | 0.00008  | 3.41165  |
| BM207372  | Wasf2,WAVE2,AW742646,D4ErtD13e                         | 5.48E-12 | 1.55129  |
| NM_031877 | Wasf1,Scar,WAVE,WAVE-1,AI195380,AI838537               | 0.00058  | 2.16564  |
| AW556980  | Wac,Wwp4,AI256735,AI256776,1110067P07Rik,A230035H12Rik | 0.0002   | 2.17879  |
| BB429200  | Vps52,ARE1,Sacm2I,D130068D18,D430041K17Rik             | 0.00036  | 3.29245  |

|           |                                                           |          |         |
|-----------|-----------------------------------------------------------|----------|---------|
| M24849    | Vim,MGC102095                                             | 4.32E-38 | 3.2119  |
| AV308858  | Vezf1,db1,AI848691,AW046909                               | 2.38E-22 | 1.9862  |
| AV290079  | Vdr,Nr1i1                                                 | 6.90E-09 | 4.10827 |
| NM_009502 | Vcl,AA571387,AI462105,AW545629,9430097D22                 | 5.20E-23 | 1.50754 |
| BC024687  | Vangl1,Lpp2,STB2,stm,mStbm,KITENIN,strabismus             | 0.00019  | 2.38075 |
| AI661876  | Utrn,DRP,Dmdl,AA589569                                    | 0.0003   | 4.62287 |
| BM235696  | Usp34,Murr2,A530081C03Rik                                 | 0.00065  | 1.88127 |
| BB206180  | Usp32,Car4,AW045245,2900074J03Rik,6430526O11Rik           | 0.00019  | 1.87529 |
| BC018179  | Usp1,MGC25559                                             | 2.30E-11 | 3.33539 |
| BB219662  | Upk1b,UPIb,Upk1,Tspan20,AI413235                          | 0.00087  | 3.76374 |
| AW108044  | Ucp2,Slc25a8                                              | 1.49E-07 | 7.77835 |
| AV174556  | Ubx4,MGC7992,6330407P03Rik                                | 0.00079  | 4.18384 |
| NM_133777 | Ube2s,E2-EPF,AA409170,MGC101982,0910001J09Rik,            | 0.00028  | 3.16604 |
| BM247269  | Ube2q,NICE-5,PRO3094,AI854014,1110002C01Rik,2310012M18Rik | 0.0005   | 1.93374 |
| AW120830  | Ube2e3,Ubce4,ubcM2                                        | 0.00007  | 1.6699  |
| NM_019912 | Ube2d2,ubc4,Ubc2e,1500034D03Rik                           | 0.00049  | 1.54771 |
| BI653033  | Ubc,TI-225,AI194771,2700054O04Rik                         | 6.69E-08 | 1.71608 |
| AK003190  | Ubb,Ubb2,AL033289                                         | 2.51E-29 | 1.50321 |
| BI408204  | Ubp2I,C77168,Nice-4,                                      | 1.09E-06 | 1.63731 |
| AK004595  | Tyki,TDKI,1200004E04Rik                                   | 0.00069  | 3.39626 |
| AF173681  | Txnp1,THIF,VDUP1,mVDUP1,Hyplip1,AA682105,1200008J08Rik    | 0.00073  | 3.47023 |
| BC004850  | Twsg1,Tsg,Twg                                             | 5.95E-11 | 1.53201 |
| NM_007855 | Twist2,Dermo1                                             | 1.23E-08 | 2.0816  |
| NM_011657 | Tulp3,AI316887                                            | 9.18E-10 | 3.51206 |
| BB387906  | Tubgcp2,1700022B05Rik                                     | 2.57E-14 | 1.70953 |
| NM_011655 | Tubb5,AA408537,AI596182,M(beta)5,B130022C14Rik            | 2.23E-37 | 1.9616  |
| BF585303  | Ttyh2,1110001A03Rik                                       | 1.06E-07 | 2.28925 |
| BC025435  | Ttc4,L62,AF007005,2810002P21Rik                           | 0.00001  | 2.26184 |
| BB833716  | Ttc3,TPRD,                                                | 0.00001  | 2.29607 |
| NM_031201 | Tsta3,FX,AI256181,Tstap35b,MGC113801                      | 0.00012  | 1.94678 |
| AV325152  | Tsply3,Gm36,AW212607,MGC58351                             | 0.00001  | 4.45237 |
| AF042180  | Tsply1,Tsply                                              | 0.00009  | 1.51933 |
| BC007185  | Tspan2,AW048009,6330415F13Rik,B230119D02Rik               | 0.00011  | 2.46599 |
| BB732603  | Tspan11,1110014F12Rik                                     | 7.28E-09 | 5.43053 |
| AV320241  | Trpm7,CHAK,CHAK1,Ltpr7,Ltrpc7,TRP-PLIK                    | 7.88E-08 | 2.2518  |
| NM_011641 | Trp63,Ket,p63,Trp63,p73L,TAp63,p51/p63,AI462811,Trp53rp1, | 1.18E-35 | 1.57556 |
| BB080177  | Trio,AA408740                                             | 5.77E-13 | 3.35786 |
| BG063064  | Trim8,GERP,Rnf27,AA408830,BB006755                        | 0.00018  | 7.44261 |
| AF230385  | Trim32,1810045E12Rik                                      | 5.83E-08 | 2.52579 |
| BC027353  | Trim29,AI119726,1110047J21Rik,2810431N19Rik,4732461M22Rik | 0.00041  | 1.5666  |
| NM_011588 | Trim28,KAP-1,Tif1b,KRIP-1,AA408787,Tif1beta,MGC102100     | 2.62E-34 | 2.34474 |
| AF230395  | Trim26,Zfp173,Zfp1736,AI462198                            | 0.00017  | 3.30758 |
| BB354684  | Trib2,TRB-2,AW319517                                      | 2.31E-24 | 5.00962 |
| BG067120  | Traf3ip2,Act1,AI429613                                    | 0.0002   | 4.45646 |
| BE995678  | Tra1,gp96,ERp99,GRP94,Tra-1                               | 0.00083  | 2.44028 |
| NM_013837 | Tpst1,R75054                                              | 3.98E-06 | 1.82208 |
| AW554765  | Tpr,C77892,2610029M07Rik                                  | 9.30E-21 | 2.54116 |
| AK003186  | Tpm2,Tpm-2,Trop-2                                         | 0.00009  | 1.73679 |
| M22479    | Tpm1,Tmpa,Tpm-1,AA986836,alpha-TM                         | 3.61E-07 | 2.30717 |
| BQ177165  | Tpbq,5T4,AW495680                                         | 2.07E-07 | 2.43023 |
| BF018714  | Topors,LUN,TP53BPL,AW105885,p53BP3/LUN                    | 1.26E-06 | 5.15206 |

|           |                                                             |          |         |
|-----------|-------------------------------------------------------------|----------|---------|
| BB166592  | Top2b,Top-2,D230016L12Rik                                   | 2.53E-06 | 1.71347 |
| BB200147  | Tns4,Cten,AU016405,9930017A07Rik                            | 0.00049  | 3.76278 |
| BB795102  | Tnrc6c,mKIAA1582,9930033H14Rik                              | 0.00096  | 1.51088 |
| BG067897  | Tnrc6b,MGC28739,A730065C02Rik,D230019K20Rik                 | 0.00005  | 2.25088 |
| BI080625  | Tnrc6a,Tnrc6,CAGH26,A                                       | 1.19E-06 | 2.38146 |
| AV306751  | Tnpo3,C81142,Trn-SR,                                        | 2.08E-12 | 5.4291  |
| BI696984  | Tnpo1,MIP,TRN,IPO2,MIP1,Kpnb2,AU021749,D13Erd688e           | 0.0002   | 2.19439 |
| BB042052  | Tnks2,AA517131,Al662480,5430432P15Rik                       | 0.00015  | 3.54149 |
| NM_031880 | Tnk1,Kos1                                                   | 7.73E-09 | 3.90157 |
| BB366863  | Tnfrsf22,SOBa,Tnfrh2,Tnfrsf1a2,mDcTrailr2,                  | 0.00014  | 2.90449 |
| AF229434  | Tnfrsf18,AITR,Gitr                                          | 0.00047  | 2.08228 |
| BM241351  | Tnfaip3,A20,Tnfp3                                           | 0.00024  | 3.63722 |
| AA153892  | Tmpo,TP,LAP2,                                               | 8.02E-15 | 1.55889 |
| BB224629  | Tmod3,UTMOD,U-Tmod                                          | 2.51E-08 | 5.79809 |
| BB325257  | Tmpai,STAG1,N4wbp4,PMEP1,AW455466,2210418I02Rik             | 1.53E-12 | 6.49596 |
| AW489972  | Tmem64,Al790744,AV300874,9630015D15Rik                      | 0.00002  | 2.63894 |
| Al505784  | Tmem47,BCMP1,Tm4sf10,Al115536,3010015F07Rik                 | 0.00035  | 1.95602 |
| BC024118  | Tmem46,9430059P22Rik                                        | 2.14E-11 | 3.46098 |
| AV290482  | Tmem17,Al503894,AW049890,MGC40971,RP23-401L13.4             | 5.02E-07 | 5.85071 |
| BG074632  | Tmem16f,AA407480,AW554778,2900059G15Rik,F730003B03Rik       | 0.00021  | 2.05218 |
| AK004359  | Tmcc2,KIAA0481,1110063G11Rik                                | 7.84E-15 | 6.35126 |
| BB428982  | Tmc7,C230064B05,C630024K23Rik                               | 6.49E-09 | 2.52211 |
| BM240385  | Tm6sf1,Al428514,BC023123,MGC25583,C630016D09Rik             | 0.00043  | 1.68058 |
| AV049820  | Tipr1,1810011K17Rik                                         | 2.86E-06 | 2.01879 |
| BB707122  | Tiparp,DDF1,PARP7,PARP-7,AW558171                           | 1.06E-10 | 4.77427 |
| BI111620  | Timp3,Timp-3                                                | 0.00007  | 4.39325 |
| M93954    | Timp2,Timp-2,D11Bwg1104e                                    | 0.00095  | 2.70988 |
| BM230269  | Timeless,tim,C77407,Debt69                                  | 0.00012  | 3.41008 |
| BG518542  | Tia1,mTIA-1,Al256674,2310050N03Rik                          | 0.00057  | 1.97069 |
| AV028402  | Thy1,CD90,Thy-1,Thy1.1,Thy1.2,Thy-1.2                       | 0.00083  | 1.57306 |
| BB350618  | Thtpa,AW122966,MGC38198                                     | 0.00004  | 2.21738 |
| BG075035  | Thrap3,Trap150,                                             | 1.05E-10 | 2.73618 |
| BB703762  | Thoc2,Tho2,Gm1139,Gm1793,6330441O12Rik,D130005M13Rik        | 0.00001  | 2.91039 |
| NM_011582 | Thbs4,TSP-4                                                 | 0.00025  | 5.5722  |
| AW556273  | Tgif2,C80753,C81206,4921501K24,5730599O09Rik                | 9.03E-18 | 4.05193 |
| NM_009372 | Tgif,AA959811,Al462167                                      | 4.05E-30 | 5.10358 |
| BB465968  | Tgfr2,DNIIR,RIIDN,AU042018,TbetaRII,TbetaR-II,1110020H15Rik | 0.00022  | 3.70279 |
| BM248342  | Tgfr1,ALK5,Alk-5,TbetaRI,AU017191,TbetaR-I                  | 9.78E-11 | 1.67879 |
| AF004833  | Tfpi,EPI,LACI,AW552122,A630013F22Rik                        | 0.0005   | 2.0195  |
| BM246377  | Tfdp2,DP3,DP-3,A330080J22Rik                                | 0.00005  | 1.94221 |
| BC003808  | Tes,TESS,Tes1,Tes2,testin2,D6Erd352e                        | 3.12E-08 | 2.34678 |
| BC017641  | Terf2ip                                                     | 0.00006  | 2.81208 |
| NM_009353 | Terf2,TRF2                                                  | 0.00057  | 1.65725 |
| D50563    | Tead2,ETF,Etdf,TEF4,TEF-4,TEAD-2                            | 0.00002  | 3.9705  |
| AK014855  | Tdp1,SCAN1,                                                 | 0.00009  | 3.33849 |
| NM_011561 | Tdg,Jza1,JZA-3,E130317C12Rik                                | 0.00004  | 1.67968 |
| U81030    | Tcof1,treacle,AA408847,AW209012                             | 9.07E-06 | 2.88051 |
| AF352579  | Tcfe2a,A1,E12,E2A,E47,ME2,ALF2,Pan1,Pan2,TCF3,VDIR          | 3.62E-07 | 4.1505  |
| AV334599  | Tcfap2b,Al606113,AP-2(beta),E130018K07Rik                   | 0.0001   | 3.47644 |
| BB065975  | Tcf7l2,Tcf4,TCF4B,TCF4E,Tcf-4,mTcf-4B,mTcf-4E               | 0.00038  | 8.2788  |
| U16321    | Tcf4                                                        | 5.82E-07 | 2.23697 |

|           |                                                       |          |         |
|-----------|-------------------------------------------------------|----------|---------|
| BE994269  | Tcf3,Tcf-3,Tcf711                                     | 2.88E-11 | 9.38046 |
| AW552808  | Tcf20,SPBP,mKIAA0292,2810438H08Rik                    | 0.0002   | 1.71641 |
| BB540782  | Tcf12,HEB,ME1,REB,ALF1,HTF4,HTF-4                     | 6.55E-09 | 2.91933 |
| AW046403  | Tcerg1,p144,Taf2s,ca150,CA150b,FBP 23,                | 0.00005  | 2.15316 |
| AI019214  | Tceb1,AA407206,AI987979,AW049146                      | 0.00031  | 1.70239 |
| AK012980  | Tbx18,2810012F10Rik,2810404D13Rik                     | 1.37E-20 | 8.1838  |
| NM_009323 | Tbx15,de,Tbx8,Tbx14                                   | 1.30E-10 | 12.1044 |
| AF326960  | Tbx1                                                  | 0        | 7.01482 |
| BF682509  | Tbl1x,Tbl1,5330429M20                                 | 5.93E-18 | 2.99046 |
| BG967046  | Tbc1d2,PARIS1,PARIS-1,BC022630                        | 0.00077  | 2.46815 |
| BC008166  | Tax1bp3,TIP-1,1300011C24Rik,RP23-263M10.10            | 1.01E-11 | 2.57873 |
| BE691515  | Tap2,Y1,APT2,Ham2,MTP2,PSF2,ABC18,Abcb3,Ham-2,Tap-2   | 1.22E-10 | 4.83182 |
| C76322    | Tagln2,Sm22B,Sm22a,KIAA0120,SM22beta,2700094C18Rik    | 0.00041  | 2.26159 |
| BC005618  | Tacstd1,EGP,Ly74,TROP1,Egp314,Ep-CAM,Tacsd1,GA733-2   | 1.78E-15 | 2.44266 |
| NM_011524 | Tacc3,Aint,C86661                                     | 0.0001   | 2.02532 |
| BC004057  | Tacc2,KIAA4180,mKIAA4180                              | 4.96E-13 | 1.65024 |
| BQ176888  | Tacc1,AA960202,4833447E04Rik,B230378H13Rik            | 0.00042  | 1.89073 |
| BB426294  | Synpo,AW046661,9330140I15Rik                          | 4.40E-06 | 5.17324 |
| BE944213  | Synj2,SJ2,AI481647,mKIAA0348                          | 0.00007  | 2.77759 |
| BF582734  | Syne2,NUA,AW546258,MGC96690,                          | 8.62E-10 | 2.00391 |
| BG066761  | Syncrip,pp68,Nsap1,Nsap1l,GRY-RBP,                    | 0.00003  | 1.78911 |
| AV024531  | Swap70,70kDa,AV235546                                 | 0.00029  | 2.80796 |
| BG066534  | Suz12,AI195385,AU016842,AW536442,                     | 2.13E-09 | 3.01235 |
| AF193862  | Suv39h1,mIS6,AI852103,AL022883,DXHXS7466e             | 1.31E-06 | 2.08953 |
| BF122782  | Surf4,Surf-4,AL033340,AL033373                        | 0.00008  | 1.74281 |
| AW536705  | Supt16h,Cdc68,Spt16,Fact140                           | 0.00032  | 1.53901 |
| AJ308624  | Sufu,Su(fu),2810026F04Rik                             | 0.00003  | 1.74896 |
| BI143915  | Stx8,CARB,0610007H08Rik,1110002H11Rik,4930571E13Rik   | 0.00002  | 2.79013 |
| BQ174465  | Stx6,AI415714,AI845861,2310039E05Rik,2410005I16Rik    | 1.37E-09 | 1.56238 |
| BB004503  | Stim2                                                 | 0.00012  | 2.01121 |
| AY029778  | Steap4,Tiarp,Tnfaip9,AI481214,dudulin 4,1110021O17Rik | 0.00005  | 2.55891 |
| NM_021448 | Statip1,Elp2,StIP1,AU023723                           | 0.00006  | 2.93223 |
| AI325183  | Stat3,Apf,AW109958,1110034C02Rik                      | 0.00055  | 2.83923 |
| BB229853  | Stat1,AA408197,2010005J02Rik                          | 0.00033  | 3.03384 |
| BQ174473  | Stag1,SA-1,AU045003                                   | 1.82E-07 | 5.8245  |
| BG071333  | St8sia2,STX,Siat8b,AI323367,ST8Siall                  | 0.00002  | 4.75679 |
| BC024835  | Ssrp1,T160,Hmgox,C81323,Hmg1-rs1,Hmgi-rs3             | 0.00049  | 1.96932 |
| BC021484  | Sspn,Krag                                             | 0.00032  | 1.67936 |
| BB038915  | Ssh2,SSH-2,mSSH-2L,BB104748,BC030940                  | 3.98E-09 | 1.92809 |
| AV295012  | Ssbp3,LAST,SSDP1,AI854733,AW551939,                   | 0.00008  | 2.60027 |
| AY037837  | Ssbp2,SSDP2,Hspc116,AU067692,AW558684                 | 0.00082  | 2.44355 |
| BG071865  | Srrm1,POP101,Srm160,AA407769                          | 4.86E-09 | 1.61152 |
| AB028050  | Srpx,drs,drs-1,mDRS-1,mDRS-2                          | 6.05E-10 | 3.14114 |
| BG805074  | Srpk2,Wbp6,mSRPK2,AW226533,AW492537,AW547358          | 0.00003  | 1.86271 |
| BG868120  | Src,AW259666,pp60c-src                                | 0.00024  | 2.51705 |
| BM232298  | Sqstm1,Osi,p62,A170,STAP,OSF-6                        | 0.00026  | 1.66478 |
| NM_011475 | Sprr2i                                                | 3.24E-06 | 5.90626 |
| AV229054  | Spred2,C79158                                         | 3.73E-12 | 1.68548 |
| AK017680  | Spred1,AL024345,AW047647,5730461F13Rik                | 0.00002  | 2.76209 |
| BQ175871  | Spon1,AI666765,AW455831,BC020531,D330035F22Rik        | 0.00008  | 4.22086 |
| BB292231  | Spnb3,KIAA0302,MGC99874,mKIAA0302                     | 8.08E-07 | 2.42109 |

|           |                                                         |          |          |
|-----------|---------------------------------------------------------|----------|----------|
| BM213516  | Spnb2,elf1,elf3,SPTB2,SPTBN1,Spnb-2,AL033301,           | 8.34E-19 | 6.91604  |
| AK011566  | Spna2,brain,Spna-2,2610027H02Rik                        | 0.00051  | 1.68216  |
| BB095517  | Spg21,MAST,ACP33,GL010,BM-019,C78576,D9Wsu18e           | 0.00008  | 1.68982  |
| BQ175052  | Specc1,KIAA4061,mKIAA4061,2810012G08Rik                 | 1.69E-06 | 2.08158  |
| BC023432  | Spats2,p59,59kDa,Scr59,2700012F11Rik                    | 0.00021  | 1.91454  |
| AK004607  | Sp3,MGC105187                                           | 4.01E-06 | 2.21197  |
| BC021759  | Sp2,mKIAA0048,493048016Rik                              | 5.25E-06 | 2.7181   |
| BG916549  | Sp1,Sp1-1,AA450830,AI845540,1110003E12Rik               | 6.91E-09 | 1.99068  |
| BC024958  | Sox9,AV220920,KIAA4243,mKIAA4243,2010306G03Rik          | 1.26E-09 | 2.2617   |
| BG083485  | Sox4,Sox-4,AA682046                                     | 0        | 3.28573  |
| NM_009236 | Sox18,Ra,Ragl,AI385749                                  | 8.89E-06 | 11.47888 |
| NM_011439 | Sox13,Sox-13,AA407916,AW259412,AW540933                 | 0        | 20.66719 |
| BC021458  | Sostdc1,Sostl,ectodin,0610006G05Rik                     | 1.56E-15 | 6.34958  |
| BM211445  | Sost,5430411E23Rik                                      | 0.00007  | 2.58392  |
| AK013519  | Sorl1,LR11,gp250,mSorLA,AI596264,AW261561,2900010L19Rik | 4.34E-12 | 5.11084  |
| NM_030889 | Sorcs2,N28137,mKIAA1329                                 | 0.00011  | 6.06247  |
| BM244966  | Son,C81487,AA409051,mKIAA1019,2900011L12Rik             | 0.00031  | 1.86728  |
| AA510713  | Socs5,Cish5,KIAA0671,mKIAA0671,1810018L08Rik            | 4.33E-08 | 1.62815  |
| BB241535  | Socs3,CIS3,Cish3,EF-10,SSI-3,SOCS-3                     | 0.00018  | 1.89733  |
| AK011015  | Snx7,MGC107328,2510028H01Rik                            | 2.19E-07 | 4.55539  |
| AI836293  | Snrpn,SMN,Peg4,HCERN3,MGC18604,MGC30325,2410045I01Rik   | 0.00027  | 3.46261  |
| NM_009225 | Snrpb,SMB,SM-B,SM11,SNRNP-B,AU018828                    | 0.00004  | 1.59987  |
| BB487754  | Sned1,SST3,Snep,AI197264,AI642697,6720455I24Rik         | 0.00004  | 4.1655   |
| BF117241  | Snape3,AI414457,1810020H02Rik,4930558A07Rik             | 1.72E-10 | 1.97805  |
| NM_011415 | Snai2,Slug,Slugh                                        | 3.11E-06 | 1.8076   |
| AV344473  | Snag1                                                   | 5.87E-16 | 1.65552  |
| AK010447  | Smyd3,Zmynd1,2410008A19Rik                              | 2.26E-06 | 2.37858  |
| U76372    | Smyd1,Bop,C78565,Zmynd18,4632404M21Rik                  | 0.00059  | 2.62891  |
| BF578669  | Smtn,smsmo                                              | 2.01E-12 | 2.92789  |
| NM_009214 | Sms,Gy,gyro,AI427066                                    | 0        | 12.03521 |
| NM_009213 | Smpd2,nSMase,nSMase1,AW108287                           | 0.0004   | 2.08972  |
| BC004831  | Smox,PAO,SMO,PAOh1,B130066H01Rik                        | 3.82E-08 | 3.49488  |
| NM_022315 | Smoc2,Smoc2l,1700056C05Rik,5430426J21Rik                | 1.81E-09 | 3.15099  |
| AW555326  | Smo,bnb,Smoh,D13Mgi8,E130215L21Rik                      | 7.69E-12 | 2.85691  |
| BG071121  | Smndc1,MGC106917,2410004J23Rik,4933440I19Rik            | 0.00081  | 2.15785  |
| AU022584  | Smc6l1,SMC6,AU018782,AW742439,KIAA4103,MGC96146,        | 1.45E-06 | 2.45014  |
| AV257384  | Smc5l1,SMC5,MGC7569,MGC30442,mKIAA0594                  | 5.25E-14 | 2.33867  |
| BI665568  | Smc4l1,C79747,2500002A22Rik                             | 0.00001  | 1.98386  |
| AK018493  | Smarce1,Baf27,2810417B20Rik,5830412H02Rik,9030408N19Rik | 9.81E-09 | 1.61728  |
| BI558117  | Smarcc1,Rsc8,SRG3,BAF155,AI115498                       | 1.03E-07 | 2.40994  |
| NM_011418 | Smarcb1,Ini1,Snf5,Baf47,AU020204,MGC132387,SNF5/INI1    | 0.00012  | 1.84649  |
| BI661719  | Smarca5,Snf2h,4933427E24Rik,D330027N15Rik               | 4.13E-06 | 1.61648  |
| AK004804  | Smad4,DPC4,Madh4,D18Wsu70e                              | 4.78E-10 | 3.66303  |
| BI646741  | Smad3,Madh3,AU022421                                    | 0.00029  | 1.81351  |
| NM_008539 | Smad1,Mlp1,Madh1,Madr1,MusMLP,AI528653                  | 1.65E-07 | 4.40851  |
| NM_011414 | Slpi                                                    | 0.00003  | 4.2824   |
| NM_032008 | Slmap,Slap,KIAA1601,mKIAA1601,D330001L02Rik             | 6.66E-06 | 2.33281  |
| BM570006  | Slit3,Slil2                                             | 3.94E-16 | 3.34751  |
| AV348121  | Slco4a1,OATP-E,MGC28799,MGC28824,Slc21a12               | 0        | 29.58858 |
| AV375182  | Slco4a1,OATP-E,MGC28799,MGC28824,Slc21a12               | 1.06E-35 | 20.88155 |
| NM_033314 | Slco2a1,Pgt,mPgt,Slc21a2,2310021C19Rik                  | 3.64E-22 | 3.40473  |

|           |                                                           |          |          |
|-----------|-----------------------------------------------------------|----------|----------|
| BB547620  | Slc7a6,LAT3,LAT-2,AI643885                                | 0.00021  | 2.63981  |
| BB433596  | Slc7a2,Tea,Cat2,Atrc2                                     | 5.74E-09 | 3.48685  |
| NM_008202 | Slc39a7,KE4,Ke-4,Ring5,H-2Ke4,H2-Ke4,                     | 8.17E-06 | 2.20114  |
| AV369681  | Slc39a3,Zip3,MGC7461,AI845814,MGC109671                   | 0.00063  | 2.0014   |
| BB399837  | Slc39a14,fad123,BC021530,MGC38539,G630015O18Rik           | 0        | 6.36103  |
| AI854658  | Slc35e3,AI481200,9330166G04Rik                            | 9.02E-07 | 2.1536   |
| AI156620  | Slc27a1,Fatp,FATP1                                        | 0.00024  | 2.07027  |
| BC026925  | Slc25a4,Ant1,AU019225                                     | 0.00007  | 1.51089  |
| AU043080  | Slc25a26,Slc25a6,AW557176,D6Bwg0781e                      | 3.73E-07 | 4.90049  |
| BF578055  | Slc25a24,2610016M12Rik                                    | 0.00012  | 3.96083  |
| NM_009195 | Slc12a4,KCC1,RBCKCC1,AW546649                             | 2.44E-07 | 3.11615  |
| BG069505  | Slc12a2,Nkcc1,mBSC2,sy-ns                                 | 0.00004  | 4.32775  |
| AV259620  | Skp2,FBXL1,MGC102075,MGC116668                            | 0.00004  | 2.89051  |
| AK019148  | Ski,MGC8300,AA062172,AA589460,                            | 0.00012  | 1.93593  |
| NM_013929 | Siva,CD27bp                                               | 2.04E-10 | 4.99357  |
| AV332957  | Shox2,OG12,Prx3,SHOT,Og12x,6330543G17Rik                  | 4.49E-11 | 4.03051  |
| AF237702  | Shmt1,Shmt,mshmt,C81125,mshmt1,mshmt2,AI324848,AI385541   | 8.15E-11 | 3.03527  |
| AV353605  | Shc4,RaLP,Gm685,6230417E10Rik,9930029B02Rik               | 0.00045  | 2.40612  |
| BB753533  | Shc1,Shc,p66,ShcA                                         | 0.00035  | 2.48823  |
| BG072612  | Sh3md2,Posh,R75531,2200003J05Rik                          | 8.74E-07 | 10.34742 |
| AK012114  | Sh3gl3,EEN-B2,SH3P13,Sh3d2c,Sh3d2c2,MGC118269             | 0.00023  | 4.57752  |
| NM_133816 | Sh3bp4,BOG25,AI594717,AW227605                            | 4.41E-17 | 6.22437  |
| NM_019989 | Sh3bgrl,1190008F14Rik                                     | 6.00E-24 | 1.80795  |
| NM_011361 | Sgk,Sgk1                                                  | 0.00051  | 1.86523  |
| AI844814  | Sgcb,43kDa,beta-SG,AI747103,AI844814                      | 0.00074  | 2.16225  |
| BB278628  | Sfrs8,SWAP,AI197402,1190005N23Rik,6330437E22Rik           | 0.00001  | 2.59192  |
| AW539046  | Sfrs6,AI314910,AW146126,1210001E11Rik                     | 8.78E-08 | 1.93075  |
| AW212917  | Sfrs5,MGC96781                                            | 2.33E-07 | 1.89648  |
| NM_020587 | Sfrs4,AW550192,MNCb-2616,5730499P16Rik                    | 3.51E-07 | 1.6439   |
| AK012092  | Sfrs2ip,SIP1,CASP11,SRRP129,AI462454,                     | 1.15E-14 | 3.92931  |
| AK011528  | Sfrs2,SC35,MRF-1,Pr264,Sfrs10,D11Wsu175e                  | 9.91E-06 | 2.35949  |
| X66091    | Sfrs1,AI482334,AW491331,1110054N12Rik,5730507C05Rik,      | 1.33E-07 | 3.09087  |
| BF224766  | Sfpq,PSF,MGC101933,D4Erttd314e,111                        | 0.00003  | 2.10061  |
| BC006603  | Sf3b5,10kDa,Sf3b10,AU043053,1110005L13Rik                 | 0.00072  | 1.54798  |
| NM_133953 | Sf3b3,RSE1,SAP130                                         | 5.95E-07 | 1.63673  |
| BE951504  | Sf3b1,TA-8,Prp10,Targ4                                    | 4.27E-14 | 3.56129  |
| AK015776  | Sf3a3,60kDa,MGC103282,4930512K19Rik                       | 7.68E-08 | 2.6031   |
| BC009091  | Sf1,MZFM,WBP4,CW17R,Zfp162,BB094781                       | 6.52E-07 | 2.3059   |
| BB131588  | Sesn3,SEST3,MGC7182,BC003348,5630400E15Rik                | 0.00002  | 2.82298  |
| BQ174721  | Sertad4,4833404A09,C130018M11Rik                          | 8.29E-37 | 2.51149  |
| NM_021372 | Sertad2,AB041541,AU021878,Kiaa0127,TRIP-Br2,MNCb-1504     | 6.72E-06 | 2.03793  |
| AF251276  | Serpini2,1810006A24Rik                                    | 3.66E-08 | 4.37931  |
| BI220012  | Serpinh1,J6,Cbp1,Cbp2,gp46,Hsp47,BERF-1,Serpinh2,colligin | 0.00002  | 3.09383  |
| AW553625  | Serpinb6a,Spi3,AI876477,Serpinb6,ovalbumin                | 0.00001  | 2.10152  |
| BM239422  | Serinc1,Tde2,Tms2,TMS-2,Tde1l,AI315070,mKIAA1253          | 6.14E-10 | 2.38701  |
| NM_017380 | Sept9,Msf,MSF1,Sint1,PNUTL4                               | 5.27E-10 | 4.79297  |
| AY043488  | Sepm,SelM,A230103K18,1500040L08Rik                        | 0.00002  | 2.41223  |
| BG066990  | Senp6,Susp1,MGC38009,mKIAA0797,2810017C20Rik,             | 2.83E-07 | 2.32807  |
| AV375653  | Sema5a,semF,Semaf,AI464145,5930434A13,9130201M22Rik       | 1.49E-18 | 7.64372  |
| BB535044  | Sema3g,AK129018                                           | 9.95E-06 | 7.18549  |
| BM222383  | Sec31l1,ABP125,ABP130,SEC31A,HSPC275,AU042160,            | 1.41E-14 | 1.94457  |

|           |                                                            |          |          |
|-----------|------------------------------------------------------------|----------|----------|
| AK013962  | Sdhd,C78570,AVLL5809,PRO19626,3110001M13Rik                | 1.25E-07 | 1.60427  |
| NM_025321 | Sdhc,AI316496,AU019277,MGC103103,0610010E03Rik             | 0.00023  | 1.77445  |
| AV227603  | Sdcbp,Sycl                                                 | 0.00041  | 1.8897   |
| BC005679  | Sdc4,Synd4,AA959608,AW108331,ryudocan,syndecan-4           | 4.60E-08 | 2.1689   |
| BI788645  | Sdc1,Synd,CD138,Synd1,syn-1,AA408134,AA409076              | 0.00025  | 1.67315  |
| BB271761  | Scyl1bp1,AI467484                                          | 4.14E-06 | 1.58613  |
| BM932452  | Scoc,AA415030,0610011C06Rik,2810002J11Rik                  | 0.00032  | 1.71081  |
| NM_011326 | Scnn1g,[g]ENaC                                             | 1.09E-06 | 6.09093  |
| NM_011325 | Scnn1b                                                     | 3.02E-18 | 7.93475  |
| AB030906  | Scmh1,Scml1,Scml3,AI315320,AI851618                        | 2.81E-07 | 3.41887  |
| BB138434  | Scarb1,CD36,Cla1,SRBI,Srb1,Cla-1,SR-B1,SR-BI,Cd36I1,mSR-BI | 0.00016  | 3.65028  |
| BI412871  | Scap,mKIAA0199,9530044G19                                  | 0.00036  | 1.71862  |
| BG065326  | Sbno1,sno,Sbno                                             | 2.33E-13 | 1.66303  |
| BC025837  | Sbk1,Sbk                                                   | 9.35E-08 | 3.88334  |
| NM_021788 | Sap30,30kDa                                                | 9.75E-06 | 1.57053  |
| BB141248  | Sacm1,SAC1,Sac1p,mKIAA0851                                 | 0.00003  | 2.46141  |
| BI452674  | S100pbp,AI851343,S100pbpr,4930429A08Rik                    | 0.00003  | 1.96115  |
| NM_009114 | S100a9,p14,Cagb,GAGB,L1Ag,BEE22,MRP14,60B8Ag,AW546964      | 1.31E-20 | 29.14233 |
| NM_013650 | S100a8,p8,B8Ag,CFAg,Caga,MRP8,CP-10,60B8Ag,AI323541        | 8.75E-27 | 10.31785 |
| BB450829  | S100a10,42C,p10,p11,CAL12,CLP11,Cal1,AA409961,AL024248     | 2.46E-08 | 6.55851  |
| M98547    | Ryk,Vik,ERK-3,AW536699                                     | 3.12E-15 | 2.99061  |
| AK010548  | Rybp,YEAF1,MGC62213,2410018J24Rik                          | 0.00014  | 2.31968  |
| NM_019685 | Ruvbl1,Tip49a,Pontin52,2510009G06Rik                       | 0.00007  | 1.54454  |
| D14636    | Runx2,Cbf,LS3,AML3,Osf2,Cbfa1,Cbfa-1,PEBP2aA               | 1.45E-06 | 3.80207  |
| NM_009821 | Runx1,AML1,Cbfa2,Pebp2a2,Pebpa2b,AI462102                  | 1.32E-09 | 5.95481  |
| BB648600  | Rtn4,ASY,NOGO,NSP-CL                                       | 3.90E-04 | 1.90123  |
| AK014540  | Rsn,CYLN1,C81039,Clip50,                                   | 0.00004  | 4.52053  |
| BM239987  | Rsl1d1,C76439,2410005K20Rik                                | 0.00003  | 2.13042  |
| AV139821  | Rpl13,L13                                                  | 4.17E-16 | 1.55691  |
| AK012979  | Ror1,mRor1,Ntrkr1,2810404D04Rik                            | 1.44E-06 | 3.79431  |
| BI662863  | Rock1,Rock-1,1110055K06Rik                                 | 4.32E-09 | 1.71497  |
| BB366379  | Robo2,mKIAA1568,                                           | 0.0034   | 1.67871  |
| NM_019996 | Rnuxa,p55,Phax,                                            | 0.00067  | 1.62646  |
| BB809469  | Rnps1                                                      | 1.59E-07 | 1.51463  |
| BB203348  | Rnpc2,caper,R75070,1500012C14Rik,2310040E03Rik             | 0.0001   | 8.16499  |
| AK011864  | Rnf38,Oip1,AA673263,1700065B19Rik,2610202O07Rik            | 2.09E-07 | 1.63049  |
| BC020122  | Rnf2,dinG,Ring1B,AI326319,AI450156,AU019207                | 1.28E-09 | 1.72714  |
| AK017523  | Rnf167,AU019305,AV328608                                   | 3.56E-13 | 1.85617  |
| AK011088  | Rnf130,GP,G1rp,G1RZFP,GOLIATH,2510042A13Rik                | 1.97E-09 | 1.77103  |
| BB441213  | Rnf12,Ha1r,RLIM,AL022832,AW743871                          | 6.80E-06 | 2.69956  |
| BI656279  | Rkhd2,BM-013,BC035207                                      | 6.93E-11 | 1.5825   |
| AF309564  | Rhoj,TCL,Arhj,TC10L,AW210585,1110005O19Rik                 | 0.00001  | 3.57426  |
| BB005249  | Rhbdl6,4732465117Rik                                       | 3.92E-08 | 6.71424  |
| BM118307  | Rhbdl4,Vrho,Rhomr1,AI847581,Ventrhoid                      | 0.00004  | 4.69025  |
| BC027346  | Rhbdl1,Dist1,C16ORF8,Egfr-rs,KIAA4242,mKIAA4242            | 0.00029  | 1.76791  |
| AF215668  | Rgs2,GOS8                                                  | 0.00024  | 1.73059  |
| BC003838  | Rgs19,GAIP,AI324841,AW547781,2610042F04Rik                 | 0.00009  | 2.0078   |
| AK004310  | Rgmb,DRAGON,1110059F19Rik                                  | 0.00028  | 1.97346  |
| BB827685  | Rgma,BC059072,MGC38550,MGC69915,C230063O06                 | 2.55E-08 | 2.32558  |
| AK013095  | Rfc3,38kDa,AU022547,2810416I22Rik                          | 0.00001  | 3.08724  |
| BF471533  | Ret,PTC,RET9,RET51                                         | 0.00006  | 4.21876  |

|           |                                                         |          |          |
|-----------|---------------------------------------------------------|----------|----------|
| BI153474  | Rest,NRSF,2610008J04Rik                                 | 1.15E-06 | 2.56906  |
| BC026463  | Rerg                                                    | 2.79E-13 | 5.50338  |
| AW556696  | Rere,ARG,ARP,Atr2,DNB1,ATN1L,AI414665                   | 3.75E-08 | 1.85996  |
| NM_009041 | Rdx,AA516625                                            | 1.75E-07 | 1.52484  |
| BC025602  | Rcn3,RLP49,MGC102610,D7Ert671e,6030455P07Rik,           | 0.00092  | 1.73147  |
| AV122997  | Rcc2                                                    | 0.00009  | 1.65896  |
| NM_011254 | Rbp1,Crbp,CRBPI,Rbp-1                                   | 1.20E-06 | 3.79399  |
| NM_011252 | Rbmx                                                    | 5.22E-08 | 5.63236  |
| BM117447  | Rbms3,MGC118437,6720477E09Rik                           | 0.00091  | 3.6272   |
| BB758922  | Rbm22,MGC91134,8430430L24Rik                            | 0.00095  | 1.612    |
| BE986909  | Rbm17,2700027J02Rik                                     | 0.00032  | 1.60786  |
| AW681705  | Rbm16,AA408306,AI447644,AI448652,AU015035               | 2.26E-06 | 1.83412  |
| NM_029397 | Rbm12,SWAN,AI852903,                                    | 6.43E-07 | 2.40651  |
| BF011461  | Rbbp4,mRbAp48                                           | 0.00001  | 2.58072  |
| BC004678  | Rassf8,Hoj1,mHoj-1,AA815821,AW123240,5133400D11Rik      | 0.00014  | 3.86765  |
| BC008101  | Rasl11b,MGC103217,1190017B18Rik                         | 4.47E-20 | 3.59767  |
| AA124924  | Rasa1,Gap,Rasa,RasGAP,MGC7759                           | 0.00009  | 2.23011  |
| BM230524  | Rapgef5,GFR,Mrgef,C86120,mmr-gef,                       | 0.00031  | 1.84993  |
| BM246972  | Rap1b,2810443E11Rik                                     | 0.00009  | 1.9436   |
| NM_019930 | Ranbp9,lbap1,IBAP-1,RanBPM                              | 0.00023  | 1.81737  |
| BF537798  | Ramp2                                                   | 1.84E-07 | 2.31587  |
| NM_016894 | Ramp1                                                   | 1.32E-15 | 4.93903  |
| BF681826  | Ralgps1,RALGEF2,AI853783                                | 0.00082  | 1.88382  |
| NM_030690 | Rai14,Norpeg,mKIAA1334,Ankycorbin,1700008J19Rik,        | 1.83E-14 | 8.73975  |
| AK013909  | Rai1,Gt1                                                | 1.64E-14 | 7.07007  |
| AF332085  | Rad21,SCC1,mKIAA0078                                    | 5.27E-13 | 7.31954  |
| NM_012025 | Racgap1,gtl11,Band25,GTPase,AI227039                    | 2.41E-06 | 2.58203  |
| BC003828  | Rac1,AL023026,D5Ert6559e                                | 9.09E-25 | 1.60239  |
| BC022119  | Rab6ip1,ORF37,AJ245569,AW496491,mKIAA1091,1500012B19Rik | 3.68E-13 | 2.17465  |
| AF327929  | Rab34,Rah,Rah1,AI326479                                 | 2.24E-41 | 2.8717   |
| NM_026405 | Rab32,AU022057,2810011A17Rik                            | 6.82E-07 | 1.6259   |
| BC006596  | Rab22a,Rab22,AI662177                                   | 0.00025  | 2.30444  |
| BE945631  | R74740                                                  | 5.08E-08 | 2.30211  |
| AW547988  | Pygb,MGC36329                                           | 6.48E-32 | 7.60938  |
| AF293882  | Pxn,AW108311,AW123232                                   | 5.83E-08 | 2.74163  |
| BM220305  | Purb,Cager-2,AA114818,D11Bwg0414e,2310015K15Rik         | 0.00012  | 1.52494  |
| BB837171  | Pum1,Pumm,AA517475,mKIAA0099                            | 9.56E-14 | 5.32755  |
| AF069051  | Pttg1,PTTG,Pttg3,C87862,Securin,AW555095                | 0.00012  | 1.62386  |
| BC012674  | Ptrf,AW546441,MGC118550,2310075E07Rik                   | 1.32E-10 | 2.00834  |
| D88187    | Ptpu,PTP,Ptpri,RPTPlambda                               | 2.11E-06 | 3.0477   |
| AI893646  | Ptprk,AI853699                                          | 2.99E-10 | 2.19988  |
| BF235516  | Ptprf,LAR,LARS,AA591035                                 | 4.03E-23 | 2.8755   |
| BB509334  | Ptpn1,PTP1B,PTP-1B                                      | 0.00031  | 1.7608   |
| AW495875  | Ptp4a2,Pri-2,MGC102154,MGC103400                        | 7.47E-06 | 3.09508  |
| BG073526  | Ptov1,AU041779,1110030G05Rik                            | 2.32E-09 | 2.8898   |
| BF787570  | Ptma,Thym,MGC102090,MGC103390                           | 3.25E-05 | 2.02395  |
| AI528614  | Ptk2,FAK,Fadk,KIAA4203,mKIAA4203                        | 0.00047  | 3.54699  |
| BI685341  | Pthlh,Pthrp,PTH-like                                    | 1.88E-29 | 10.50772 |
| NM_008958 | Ptch2,ptc2                                              | 1.39E-14 | 4.65671  |
| BG071079  | Ptch1,Ptc,mes,Ptc1,Ptch,A230106A15Rik                   | 0        | 15.89396 |
| BC025110  | Ptcd2,1190005P08Rik                                     | 0.00023  | 2.18276  |



|           |                                                             |          |         |
|-----------|-------------------------------------------------------------|----------|---------|
| BC007472  | Ptbp1,Ptb,PTB2,PTB3,PTB4,pPTB,HNRPI,PTB-1,AA407203          | 1.57E-08 | 3.54852 |
| BG075584  | Psme4,TEMO,AA409398,AU041366,KIAA0077,mKIAA0077             | 0.00037  | 2.8583  |
| AV136581  | Psmc11,S9,P44.5                                             | 0.00044  | 1.66609 |
| NM_010724 | Psmb8,Lmp7,Lmp-7                                            | 0.00007  | 4.00883 |
| NM_011182 | Pscd3,Grp1,AI648983,KIAA4241,mKIAA4241                      | 1.83E-08 | 2.5016  |
| BQ176370  | Prune,HTCD37,DRES-17,PRUNEM1,C130058A12,9230112O05Rik       | 0.00002  | 3.55667 |
| NM_133731 | Prss22,BSSP-4,SP001LA,4733401N09Rik                         | 3.04E-06 | 3.57445 |
| NM_011177 | Prss18,Bssp,Klk6,Klk7,Klk29,Prss9,AI849898,neurosin         | 1.89E-07 | 6.35044 |
| NM_008939 | Prss12,Bssp-3                                               | 0.00071  | 4.07507 |
| L06502    | Prrx1,K-2,Pmx1,Prx1,mHox,                                   | 2.21E-06 | 1.67005 |
| AK014046  | Prr6,AA671303,3110013H01Rik,RP23-234K24.4                   | 0.0008   | 2.13727 |
| BC024942  | Prps2,Prps-2,AA589463,AI464149,MGC28388,2610101M19Rik       | 0.00001  | 2.30901 |
| AK011304  | Prps1,C76571,C76678,Prps-1,2310010D17Rik                    | 0.00099  | 2.02233 |
| NM_138659 | Prpf8,Prp8,Sfprp8,AU019467,DBF3/PRP8,D11Bwg0410e            | 2.62E-07 | 1.94529 |
| AA409562  | Prp19,PSO4,Snev,NMP200,AA617263,AL024362                    | 2.79E-16 | 1.75409 |
| BF160591  | Prkcn,MGC47171,4930557O20Rik,5730497N19Rik                  | 1.35E-08 | 2.00568 |
| NM_008856 | Prkch,Pkch                                                  | 0.00002  | 2.97648 |
| BC009660  | Prkcdp,SRBC,MGC6598,3110015B12Rik,6330514M23Rik             | 2.63E-07 | 2.09239 |
| BB274009  | Prkar1b,Rlbeta,AI385716                                     | 0.0006   | 3.57734 |
| AV024339  | Prkacb,Pkacb                                                | 0.00003  | 1.87848 |
| BQ177191  | Prickle2,6230400G14Rik,6720451F06Rik                        | 0.0002   | 5.06156 |
| BC022643  | Prickle1,Prickle,AW215793,1110058P22Rik                     | 0.00028  | 2.15364 |
| AK018310  | Prdm5,PFM2,4432417F03Rik,6530401I24Rik,E130112L17Rik        | 0.00041  | 2.82143 |
| BC009657  | Pqbp1,Sfc2,PQBP-1                                           | 0.00064  | 2.13787 |
| M81483    | Ppp3cb,CalnB,CnAbeta,1110063J16Rik                          | 0.00004  | 3.08    |
| AI313926  | Ppp3ca,CN,CnA,Caln,Calna,AI841391,AW413465,2900074D19Rik    | 0.00003  | 1.76546 |
| BB107628  | Ppp2r5e,AI449017,4633401M22Rik                              | 0.00022  | 2.04002 |
| BB535888  | Ppp2r5e,AI449017,4633401M22Rik                              | 9.48E-07 | 1.9336  |
| BC025479  | Ppp1r8,NIPP1,AU044684,MGC38560,6330548N22Rik                | 0.00013  | 1.81568 |
| NM_133485 | Ppp1r14c,KEPI,6330514J04Rik                                 | 0        | 2.63889 |
| AV309184  | Ppp1r12a,Mypt1,AA792106,AV099298,D10ErtD625e,               | 0.00002  | 1.63511 |
| BG071790  | Ppp1cc,PP1,dis2m1                                           | 4.39E-11 | 1.7267  |
| AV290622  | Ppm2c,Gm1024                                                | 0.00025  | 1.55782 |
| NM_016910 | Ppm1d,Wip1,AV338790                                         | 0.00015  | 3.42806 |
| NM_008908 | Ppic,CyP-20c                                                | 1.26E-18 | 2.06012 |
| NM_080555 | Ppap2b,Lpp3,Ppab2b,AV025606,D4Bwg0538e,D4Bwg1535e           | 0.00006  | 1.63188 |
| BC011417  | Ppa2,MGC6539,Sid6306,1110013G13Rik                          | 0.00002  | 1.51411 |
| NM_011137 | Pou2f1,Otf1,Oct-1,Otf-1,Oct-1A,Oct-1B,Oct-1C,Oct-1L,        | 0.00022  | 1.77831 |
| AB036749  | Porcn,Ppn,porc,Mporc,mMg61,Mporc-a,Mporc-b,Mporc-c,Mporc-d, | 0.00049  | 1.92634 |
| C80273    | Pom121,C80273,mKIAA0618,2610027A18Rik                       | 0.00032  | 3.99937 |
| AI931937  | Polr3f,RPC6,RPC39,MGC11656,2810411G20Rik,                   | 0.00073  | 1.77705 |
| BB772197  | Polr3c,RPC3,RPC62,4933407E01Rik                             | 0.00071  | 1.75819 |
| U37500    | Polr2a,220kDa,Rpo2-1                                        | 0.00033  | 1.52051 |
| AK008143  | Pnp,Np,Np-1,Np-2,AL024301,AU015798                          | 0.00041  | 1.50428 |
| AV135835  | Pnn,AU045199,D12ErtD512e                                    | 2.21E-06 | 1.94731 |
| BG298178  | Pnlcd1,Gm313,FLJ35820                                       | 0.00084  | 5.88306 |
| NM_011125 | Pltp                                                        | 8.04E-09 | 5.77342 |
| BB826296  | Plscr4,AV245873                                             | 0.00079  | 2.53305 |
| BC021352  | Plod2,LH2,Plod-2,D530025C14Rik                              | 0.00043  | 2.31861 |
| NM_011122 | Plod1,LH1,Plod,AI854890,AV007929,2410042F05Rik              | 0.00002  | 3.04067 |
| BG070082  | Plekhc1,Mig2,AA960555,MGC36305                              | 1.05E-14 | 4.92577 |

|           |                                                            |          |          |
|-----------|------------------------------------------------------------|----------|----------|
| BI905111  | Plekha7,AI414265,MGC90927,A430081P20Rik                    | 0.00024  | 2.15416  |
| AW546508  | Plcg2,Plcg-2,MGC38590                                      | 7.00E-19 | 3.49128  |
| BM121087  | Plcg1,Cded,Plc-1,Plcg-1,AI894140,Plc-gamma1                | 0.00015  | 1.65612  |
| NM_008872 | Plat,tPA,t-PA,AU020998,AW212668,D8Erd2e,MGC18508           | 2.67E-28 | 3.89246  |
| AK005158  | Pla2g7,R75400                                              | 5.47E-19 | 15.1723  |
| BB315153  | Pla2g3,9130003P18Rik                                       | 0.00047  | 2.25613  |
| BF160731  | Pja2,AI447901,AL022700,MGC27629,Neurodap1,mKIAA0438        | 2.74E-11 | 2.25435  |
| NM_021308 | Piwil2,mili,Piwil1l                                        | 5.40E-22 | 19.87868 |
| NM_011256 | Pitpnm2,NIR3,Rdgb2,RDGBA2,mKIAA1457                        | 0.00008  | 5.27361  |
| BG975479  | Pitpnb,AI256223,AU040890                                   | 6.94E-07 | 7.54399  |
| M60651    | Pik3r1,PI3K,AA414921,p50alpha,p55alpha,p85alpha,C530050K14 | 0.00053  | 2.00859  |
| NM_053191 | Pi15,P24TI,P25TI,SugarCrisp                                | 0.00005  | 3.27643  |
| BB427286  | Phyhip,Lnap1ip,AW049870,MGC40960,PAHX-AP1                  | 0.00034  | 3.26381  |
| NM_009344 | Phlda1,Tdag,TDAG51,DT1P1B11                                | 0.00016  | 1.84299  |
| BB425239  | Phip,Ndrp,Wdr11,2810004D21Rik,4632404O06Rik                | 1.40E-08 | 3.34511  |
| AV011460  | Phf23,JUNE-1,2410141M05Rik,RP23-172M21.13                  | 0.00088  | 1.64703  |
| BB094173  | Phf21a,Bhc,80kDa,Bhc80,PFTF1,MGC29190                      | 2.59E-06 | 3.41859  |
| BF468039  | Phf2                                                       | 0.00005  | 2.45405  |
| BE573407  | Phca,AV015045,1110057L18Rik,5430429L08Rik                  | 0.00007  | 3.44041  |
| NM_018774 | Phc2,Edr2,Mph2,AA415044,D4Erd810e,D130050K19Rik            | 0.00006  | 2.15917  |
| BM240147  | Pggt1b,BGG1,GGT1,AI451237,AI551093,2610100E13,             | 0.00024  | 1.86486  |
| NM_019410 | Pfn2,Pfn                                                   | 4.48E-10 | 2.10803  |
| BM238318  | Per2,mPer2,mKIAA0347                                       | 0.00019  | 1.60655  |
| M13227    | Penk1,ENK,PPA,Penk,AI326464                                | 6.54E-10 | 6.79655  |
| AB003040  | Peg3,Pw1,End4,Gcap4,Zfp102,AL022617,mKIAA0287              | 1.50E-07 | 5.07768  |
| NM_018884 | Pdzrn3,LNX3,Semcap3,AI429718,AL023082,1110020C07Rik        | 7.85E-36 | 2.08568  |
| AK010339  | Pdlim7,Enigma,AV007930,1110003B01Rik,2410002J21Rik         | 7.15E-14 | 5.72557  |
| BC006865  | Pdia6,P5,CaBP5,C77895,Txndc7,AL023058,1700015E05Rik        | 0.00001  | 2.19277  |
| NM_008810 | Pdha1,Pdha-1                                               | 0.00097  | 2.13355  |
| AW537708  | Pdgfra,CD140a,Pdgfr-2,AI115593                             | 1.70E-11 | 4.62524  |
| NM_019971 | Pdgfc,AI647969,1110064L01Rik                               | 1.14E-06 | 2.48419  |
| BB371842  | Pdgfa                                                      | 1.71E-18 | 5.1986   |
| BM246564  | Pde4b,Dpde4,dunce,R74983                                   | 2.09E-08 | 6.40803  |
| BG065186  | Pdap1,PAP,PAP1,HASPP28                                     | 1.68E-06 | 2.95621  |
| BB241731  | Pcsk5,PC6,SPC6                                             | 3.86E-09 | 7.27694  |
| BM117243  | Pcmdt2,AI314201,MGC36470,5330414D10Rik                     | 1.70E-17 | 2.01945  |
| NM_023662 | Pcm1,2600002H09Rik,9430077F19Rik,C030044G17Rik             | 0.00004  | 1.65618  |
| NM_053145 | Pcdhb20,PcdhbT,Pcdhb14                                     | 0.00001  | 4.03769  |
| BM218630  | Pcdh18,PCDH68L,BB095589,3110038E07Rik                      | 0.00038  | 2.77305  |
| NM_017463 | Pbx2,G17,AU043397                                          | 0.00072  | 2.11343  |
| BG065752  | Pb1                                                        | 0.00005  | 1.95379  |
| BI690209  | Parva,Actp,Parvin,AI225929,AU042898,CH-ILKBP               | 6.07E-06 | 2.44822  |
| BB552308  | Parp4,PH5P,p193,Gm743,PARPL,VPARP,VAULT3                   | 0.00036  | 2.1463   |
| BM227980  | Parp12,PARP-12,Zc3hdc1,AA409132,AA536654,9930021O16        | 3.91E-06 | 2.32513  |
| AW543460  | Pard3,ASIP,Par3,PAR-3,AA960621,AI256638,D8Erd580e          | 0.00017  | 2.27063  |
| NM_011863 | Papss1,SK1,Asapk,AI325286                                  | 2.03E-25 | 1.60645  |
| NM_023245 | Palmd,PALML,4631423C22Rik                                  | 2.02E-08 | 3.0947   |
| BF456404  | Pak1,Paka,PAK-1,AW045634                                   | 0.00035  | 4.89251  |
| BC019726  | Paip1                                                      | 0.00027  | 1.58901  |
| BM207712  | Paics,AIRC,PAIS,ADE2H1,2610511I09Rik                       | 5.43E-37 | 1.69296  |
| NM_008776 | Pafah1b3,Pafahg,mus[g]                                     | 0.00084  | 1.8553   |

|           |                                                                 |          |          |
|-----------|-----------------------------------------------------------------|----------|----------|
| BB539054  | Pafah1b2,Pafahb,mus[b],AI747451,AU021353                        | 0.00097  | 2.45983  |
| BM115617  | Pacs1,AI325977,MGC37046                                         | 0.00004  | 1.73352  |
| AI314028  | P4ha1,P4ha,AL022634                                             | 0.00006  | 1.92843  |
| AB015978  | Osmr,OSMRB                                                      | 4.30E-14 | 2.25053  |
| NM_025661 | Ormdl3,AI315223,2810011N17Rik                                   | 0.00007  | 4.53176  |
| AV127023  | Odz4,Doc4,ELM2,I7Rn3,R75022,Ten-m4,I(7)-3Rn,mKIAA1302           | 3.56E-09 | 1.77285  |
| BB472509  | Odz3,Odz1,Ten-m3,mKIAA1455,2610100B16Rik                        | 3.18E-06 | 4.16925  |
| BM899576  | Odz2,Odz3,Ten-m2,mKIAA1127,D3Bwg1534e                           | 2.48E-06 | 4.42256  |
| AU041975  | Nxn                                                             | 0.00003  | 4.26475  |
| NM_053074 | Nup62,p62,Nupc1                                                 | 0.0002   | 1.58737  |
| BC004655  | Nup107,C76801,AW541137                                          | 0.00006  | 1.80148  |
| NM_030699 | Ntng1,Lmnt1,AI853992,MGC99878,A930010C08Rik                     | 0.00018  | 3.26543  |
| BQ086474  | Ntn4                                                            | 0.00056  | 1.76864  |
| AI462899  | Ntf5,NT4,NT-4,Ntf4,NT4/5,Ntf-5,AI462899,2900040K06Rik           | 0.00017  | 3.21513  |
| NM_008738 | Nrtn,NTN                                                        | 0.00042  | 2.71167  |
| BE956701  | Nrip1,RIP140                                                    | 0.00057  | 3.15103  |
| BB018528  | Nras,N-ras,AV095280                                             | 2.19E-06 | 1.84744  |
| NM_016789 | Nptx2,np2,narp                                                  | 1.76E-09 | 7.38562  |
| AA223007  | Npnt,Nctn,POEM,AA682063,AI314031,1110009H02Rik                  | 0.0005   | 1.53798  |
| BC007190  | Npc2,HE1,AA408070,AU045843,2700012J19Rik                        | 0.00056  | 2.01235  |
| NM_008714 | Notch1,Mis6,Tan1,lin-12,9930111A19Rik                           | 1.54E-07 | 3.35113  |
| NM_023144 | Nono,nonA,NRB54,P54NRB,AA407051,AV149256,MGC103109              | 1.33E-10 | 2.04121  |
| AK005123  | Nol11,AU015220,AU019874,1500002M01Rik                           | 0.00095  | 1.51779  |
| AU042744  | Nlgn2,MGC67386,RP23-422L16.24                                   | 4.94E-06 | 2.59131  |
| BB025231  | Nisch,I-1,AW494485,1200007D05Rik,3202002H23Rik                  | 7.08E-06 | 3.92194  |
| NM_025623 | Nipsnap3a,Nipsnap3b,2700063N13Rik                               | 1.01E-09 | 2.03328  |
| AV306253  | Nipsnap1                                                        | 1.52E-08 | 2.49295  |
| X14480    | Nid1,Nid,entactin,nidogen-1,A630025O17,entactin-1               | 2.13E-19 | 2.67609  |
| BC013565  | Nhsl1,BC013565,KIAA1357,mKIAA1357,A730096F01                    | 2.19E-07 | 1.86955  |
| BI407690  | Ngfrap1,Bex3,Nade,AL033356,DXWsu67e                             | 4.86E-08 | 2.01418  |
| BM120578  | Nfrkb,A530090G11Rik                                             | 6.92E-06 | 1.9031   |
| L28118    | Nfkb1,p50,p105,NF-KB1,p50/p105,NF-kappaB,NF-kappaB1             | 0.00007  | 1.57214  |
| BB315728  | Nfix                                                            | 2.80E-28 | 3.37525  |
| BI664122  | Nfib,6720429L07Rik,E030026I10Rik                                | 0.00058  | 2.17657  |
| L28176    | Nf2,merlin                                                      | 4.41E-08 | 1.99942  |
| BB528391  | Nek6,1300007C09Rik                                              | 9.11E-10 | 2.30118  |
| BB458177  | Nedd9,E230025G09Rik                                             | 2.01E-08 | 1.94027  |
| BB663717  | Nedd4I,Nedd4b,Nedd4-2,1300012C07Rik                             | 1.79E-12 | 5.3767   |
| NM_010890 | Nedd4,Nedd4a,Nedd4-1,                                           | 1.30E-15 | 2.01236  |
| BI652065  | Ndst1,Hsst,NDST-1,1200015G06Rik                                 | 3.53E-36 | 2.1592   |
| NM_013864 | Ndr2,Ndr2,SYLD,AI182517,AU040374                                | 1.06E-11 | 2.61739  |
| NM_010883 | Ndph,ND,NDP                                                     | 3.26E-09 | 5.01839  |
| BQ032232  | Nde1,Nude,mNudE,AU042936,AW822251,2810027M15Rik                 | 1.35E-09 | 2.23869  |
| NM_011424 | Ncor2,SMRT,N-CoR,SMR Te                                         | 1.42E-14 | 2.30633  |
| U22016    | Ncor1,N-CoR,RIP13,Rxrip13,mKIAA1047,5730405M06Rik,A230020K14Rik | 3.09E-08 | 2.62437  |
| NM_010879 | Nck2,Grb4,NCKbeta                                               | 9.23E-14 | 4.11448  |
| BB698413  | Ncam1,CD56,Ncam,E-NCAM,NCAM-1,NCAM-120,NCAM-140,NCAM-180        | 1.00E-21 | 21.27201 |
| BG071381  | Ncald,AI848120,D15Ert412e,D030020D09Rik                         | 0.00002  | 3.90721  |
| AA986379  | Nbea,Lyst2,mKIAA1544                                            | 0.00002  | 1.87831  |
| BG064031  | Nap1I1,NAP-1,AA407126,AI256722,D10Ert468e                       | 3.09E-13 | 3.43934  |
| BI151886  | Nans,Sas,4632418E04Rik                                          | 0.00059  | 2.39095  |

|           |                                                                |          |          |
|-----------|----------------------------------------------------------------|----------|----------|
| AA406997  | Myo1b,AA406997,myosin-1b                                       | 1.37E-20 | 2.2411   |
| BF451748  | Mylk,KRP,MIck,MLCK108,MLCK210,                                 | 5.65E-09 | 2.56392  |
| NM_022410 | Myh9,Myhn1,C80049,D0Jmb2,Myhn-1,TU-72.6,NMHC II-A,             | 5.97E-07 | 1.87013  |
| U13262    | Myef2,mKIAA1341_9430071B01                                     | 0.00052  | 2.16531  |
| BC005453  | Mycn,Nmyc,N-myc,Nmyc1,Nmyc-1,c-nmyc                            | 0.00002  | 2.56795  |
| AW228043  | Mybbp1a,P160,p67MBP,p160MBP,AL024407,AU019902                  | 0.00053  | 2.14694  |
| BI078799  | Myadm,D7Wsu62e                                                 | 0.00052  | 1.84698  |
| BB139464  | Mvp,LRP,VAULT1,2310009M24Rik                                   | 0.00001  | 2.62795  |
| BC024131  | Mtss1,Mim                                                      | 1.11E-06 | 2.12409  |
| NM_008098 | Mtpn,V1,Gcdp,5033418D15Rik                                     | 1.41E-06 | 2.57799  |
| BB431693  | Mtmr7                                                          | 0        | 12.30862 |
| BE952757  | Mtmr11,CRA,AI035306,BC051083,MGC59008                          | 2.78E-06 | 5.8936   |
| BG066919  | Mtf2,M96,C76717,AA537621,MGC116639,9230112N11Rik               | 0.00052  | 1.82704  |
| AV083741  | Mtdh,3D3,Lyric,AV353288,3D3/Lyric,D8Bwg1112e,2610103J23Rik     | 0.00014  | 1.75379  |
| NM_134092 | Mtbp,MDM2BP,AI429604                                           | 0.0003   | 1.7786   |
| BG075139  | Mtap,MSAP,1300019I21Rik                                        | 0.00001  | 3.0246   |
| NM_054081 | Mta1                                                           | 0.00009  | 2.16968  |
| BQ175453  | Msn,C78546                                                     | 0        | 3.02187  |
| BC022587  | Mrps9,mg637,AW322516,2310002A08Rik                             | 0.00067  | 1.99536  |
| BC021947  | Mrps5,AI850294,1620401116Rik                                   | 0.00039  | 2.203    |
| AB049633  | Mrpl3,AA407889,2010320L16Rik,5930422H18Rik                     | 6.83E-06 | 2.54445  |
| BB210729  | Mr1,H2ls                                                       | 7.35E-11 | 3.17762  |
| AW258373  | Mpp5,Pals1,AI255216,AI644496,3830420B02Rik                     | 0.00022  | 2.3444   |
| BC008161  | Mphosph6,C86426,AA536809,1110001M01Rik                         | 0.00001  | 2.11604  |
| AK019164  | Mpdz,MUPP1,AI225843,B930003D11Rik                              | 0.00036  | 2.50682  |
| BM241485  | Mpa2l,AI595338                                                 | 0.00075  | 3.49488  |
| NM_021509 | Moxd1,MNCb-5203,3230402N08Rik                                  | 3.24E-09 | 2.22247  |
| BC017619  | Morf4l1,MRG15,TEX189,TEG-189,                                  | 2.15E-07 | 1.88772  |
| AK017167  | Mon1b,5031407H10,5033413H12Rik                                 | 0.00083  | 2.36732  |
| NM_010813 | Mnt,Rox                                                        | 1.55E-07 | 2.66546  |
| BB767109  | Mmp15,MT2-MMP,AI503551                                         | 0.00036  | 2.37627  |
| NM_008608 | Mmp14,MT1-MMP,AI325305,MT-MMP-1                                | 2.24E-08 | 2.50492  |
| NM_008606 | Mmp11,ST3,Stmy3                                                | 8.18E-06 | 3.93418  |
| AV174022  | Mme,NEP,CD10,CALLA,C85356,6030454K05Rik                        | 0.00016  | 1.86214  |
| AF265663  | Mlixp,Mir,Mondoa,AW228700,mKIAA0867_B930074I24                 | 0.00019  | 1.7168   |
| AK019458  | Milt3,Af9,D4ErtD321e,2210011H10Rik,2610012I03Rik,3830408D16Rik | 3.55E-08 | 5.15312  |
| AK017541  | Mil,HRX,AI1,ALL-1,Cxxc7,HTRX1,KIAA4050,mKIAA4050,6430520K01    | 1.98E-08 | 2.01822  |
| BQ176661  | Mkrn1,RFP                                                      | 0.00054  | 2.26225  |
| BQ175722  | Mki2,MRTF-B,KIAA1243,mKIAA1243                                 | 0.00008  | 3.127    |
| BM236206  | Mier1,MGC107532,mKIAA1610,4933425I22Rik,5830411K19Rik          | 0.00088  | 1.89777  |
| NM_019394 | Mia1,MIA,Cdrap,CD-RAP                                          | 0.00002  | 5.12486  |
| NM_023799 | Mgea5,Hy5,                                                     | 1.07E-08 | 4.64812  |
| AK015544  | Mgat5,GlcNAc-TV,4930471A21Rik,5330407H02Rik                    | 0.00003  | 3.49903  |
| AK018181  | Mfn1,HR2,                                                      | 6.03E-13 | 2.9379   |
| BE225764  | Mfhas1,D8ErtD91e,2310066G09Rik                                 | 3.21E-07 | 2.21441  |
| NM_008594 | Mfge8,P47,Mfgm,SED1,MFG-E8,AA408458,AI325141                   | 6.50E-06 | 1.96977  |
| NM_015776 | Mfap5,MAGP-2                                                   | 2.06E-13 | 3.34193  |
| BI661422  | Mfap3,AW536327,2610509F16Rik,2700079M14Rik                     | 0.00004  | 1.85782  |
| NM_008587 | Mertk,Eyk,Mer,Nyk                                              | 0.00005  | 2.01197  |
| AI595932  | Mef2c,AV011172,5430401D19Rik,9930028G15Rik                     | 2.18E-16 | 10.84151 |
| AF071310  | Med12,Mopa,OPA-1,230kDa,Tnrc11,Trap230                         | 0.00003  | 2.08513  |

|           |                                                             |          |          |
|-----------|-------------------------------------------------------------|----------|----------|
| M34328    | Mdk,MK,Mek,cytokine                                         | 1.94E-06 | 3.39199  |
| NM_008568 | Mcm7,Mcmd7,mCDC47                                           | 0.00016  | 1.93643  |
| BB099487  | Mcm6,Mcmd6,ASP-I1,D1Wsu22e                                  | 0.00004  | 1.69489  |
| NM_019434 | Mcm3ap,GANP,mKIAA0572                                       | 0.00026  | 2.23248  |
| BC003839  | Mcl1,AW556805                                               | 0.00023  | 1.5409   |
| NM_023061 | Mcam,CD146,CD149,Muc18,s-endo,AV025631,1-gicerin,s-gicerin  | 1.54E-08 | 4.42437  |
| BF226671  | Matr3,AI841759,AW555618,mKIAA0723,D030046F20Rik             | 0.00068  | 1.5978   |
| BC026445  | Mark3,Emk2,ETK-1,                                           | 0.00003  | 2.08184  |
| NM_010807 | Marcksl1,F52,Mlp,Mrp,D4Bc1,Macs2,Macs3,                     | 2.03E-12 | 3.74822  |
| AW546141  | Marcks,Macs,PKCSL                                           | 6.39E-06 | 1.70722  |
| NM_008696 | Map4k4,HGK,Nik,AU045934                                     | 0.0002   | 3.50634  |
| D76446    | Map3k7,Tak1,C87327,B430101B05                               | 0.00007  | 1.80805  |
| BB261602  | Map2k6,MEK6,MKK6,Prkmk6,SAPKK3                              | 0.0006   | 3.2167   |
| BB025010  | Map2k5,MEK5,Mapkk5,Prkmk5,AI324775,AI428457                 | 5.83E-07 | 2.42897  |
| AU080586  | Map1lc3b,Map1lc3,1010001C15Rik                              | 1.44E-07 | 1.86141  |
| BB549292  | Maob,6330414K01Rik                                          | 9.20E-06 | 3.00972  |
| BB794673  | Man2a2,MX,AI480988,1700052O22Rik,4931438M07Rik              | 0.00016  | 1.97843  |
| BB485735  | Malt1,MGC124469,MGC124470,A630046N12,D430033E09Rik          | 0.00001  | 3.15474  |
| BG083730  | Mak10,AI158944,A330021G12Rik,A330027C19Rik,C030004C14Rik    | 3.02E-10 | 3.02834  |
| AF027503  | Magi1,AIP3,BAP1,WWP3,Baiap1,Gukmi1,MAG1c,Magi-1,TNRC19      | 5.98E-22 | 5.26823  |
| NM_019791 | Maged1,NRAGE,Dixin,Dlxin1,Dlxin-1,FLJ00163,mFLJ00163,       | 4.21E-23 | 4.80408  |
| BM248206  | Macf1,Acf7,MACF,Aclp7,mACF7,ABP620,R74989,mKIAA0465         | 0.00012  | 2.30856  |
| NM_016753 | Lxn                                                         | 1.37E-12 | 2.77378  |
| BI076494  | Luc7l2,Cgi74,CGI-59,CGI-74,AA522013,AU015269,4930471C18Rik  | 1.33E-11 | 2.17537  |
| NM_008520 | Ltbp3,Ltbp2,mFLJ00070                                       | 5.98E-23 | 4.03165  |
| BI696719  | Lta4h                                                       | 8.12E-07 | 1.52718  |
| BM211048  | Ltap,Lp,Lpp1,stbm,Vangl2,Vangl12,C530001F03Rik              | 1.78E-04 | 1.64232  |
| AF204156  | Lsm2,G7b,SmX5,Dmapl,Sm-X5,snRNP,Dmpkap                      | 4.27E-07 | 3.4706   |
| NM_008516 | Lrrn1,NLRR-1,2810047E21Rik                                  | 0.00001  | 7.13277  |
| BB315861  | Lrrc8d,Lrrc5,A930019F03,4930525N13Rik                       | 5.82E-06 | 2.36181  |
| AK013512  | Lrrc47,AA960559,mKIAA1185,2900010D03Rik                     | 0.00074  | 1.70873  |
| AV254798  | Lrp12,AI848829,C820005L12Rik                                | 3.44E-09 | 2.05226  |
| NM_008377 | Lrig1,lmg,LIG-1,D6Bwg0781e                                  | 2.44E-40 | 21.88026 |
| BB763476  | Lrch3,Gm1742,AW215594,2210409B11Rik                         | 0.00005  | 1.68389  |
| BB297498  | Lpp,C79715                                                  | 5.38E-07 | 2.24162  |
| AK021389  | Lpin2,AI481352,AW742896,2610511G02Rik                       | 6.74E-06 | 3.10851  |
| NM_015763 | Lpin1,fld,Kiaa0188,mKIAA0188,4631420P06                     | 1.09E-06 | 5.57586  |
| BB274232  | Lphn3,LEC3,CIRL-3,Gm1379,                                   | 6.04E-09 | 2.32773  |
| AA987131  | Lphn1,Lec2,CLIBA,AI182398,                                  | 0.00068  | 1.90123  |
| BB238427  | LOC545856                                                   | 7.21E-08 | 2.1034   |
| BG065562  | Lnpep,CAP,IRAP,PLAP_gp160,vp165,2010309L07Rik,4732490P18Rik | 0.00075  | 3.05901  |
| AW536901  | Lnk,AI429800                                                | 0.00013  | 2.44234  |
| NM_010723 | Lmo4,Crp3,Etphi4,A730077C12Rik                              | 7.40E-43 | 3.246    |
| AK013416  | Lmo2,Ttg2,Rbtn2,Rbtn-2,Rhom-2                               | 5.51E-09 | 4.12835  |
| BC019124  | Lmcd1,dyxin,AW455500,AW553074,MGC29184                      | 0.00018  | 3.9638   |
| BG071597  | Lman1,P58,MR60,gp58,F5F8D,MCFD1,ERGIC53                     | 0.00003  | 2.46118  |
| AV360881  | Litaf,TBX1,C85531,N4WBP3,3222402J11Rik                      | 0.00068  | 3.78234  |
| AI596237  | Lip1,Lal,Lipa,Lip-1,AA960673                                | 0.00032  | 1.87834  |
| BB547181  | Lin10,MGC6480,BC006874,D230025D16Rik                        | 0.00079  | 2.20719  |
| D17444    | Lifr                                                        | 0.00002  | 3.1031   |
| NM_010710 | Lhx2,ap,LH2A,Lh-2,Lim2,apterous                             | 0        | 16.68454 |

|           |                                                                  |          |          |
|-----------|------------------------------------------------------------------|----------|----------|
| AV337396  | Lgr6,D830026M09,A530037C04Rik                                    | 1.08E-07 | 4.83837  |
| BB751088  | Lgr5,FEX,Gpr49                                                   | 8.76E-36 | 5.8885   |
| NM_008495 | Lgals1,L14,Galbp,L-14.5,Lect14,AA410090,galectin-1               | 8.13E-17 | 3.48761  |
| NM_008494 | Lfng,AW061165                                                    | 0.00021  | 2.6229   |
| U42467    | Lepr,db,Obr,obl,LEPROT,OB-RGRP,diabetes,MGC105189,obese-like     | 1.05E-18 | 6.64615  |
| BM242619  | Lemd3,Man1,AI316861                                              | 3.97E-06 | 2.11376  |
| AK007400  | Lbh,1810009F10Rik,6720416L16Rik                                  | 1.80E-06 | 1.6514   |
| AV271979  | Lats2,AV277261,AW228608,4932411G09Rik                            | 0.00042  | 2.41597  |
| AY029532  | Lass2,TRH3,AI225939,0610013I17Rik                                | 0.0009   | 1.66118  |
| BG146595  | Lasp1,Def-4,SH3P6,AA408629                                       | 2.67E-13 | 6.16626  |
| BG066605  | Lamc1,Lamb2                                                      | 1.52E-19 | 2.9874   |
| NM_008484 | Lamb3                                                            | 3.67E-10 | 3.74347  |
| BC026051  | Lamb2,Lams,Lamb-2,AW211941                                       | 0.00048  | 3.39393  |
| BG970109  | Lamb1-1,C77966,C80098,C81607,Lamb-1,D130003D08Rik                | 9.53E-10 | 1.87885  |
| AV224009  | Lama5,[a]5,AA408760,AA408762,AI853660,mKIAA0533                  | 0.0001   | 4.67206  |
| X84014    | Lama3,[a]3B,Lama3B                                               | 2.28E-27 | 3.42242  |
| U12147    | Lama2,dy,mer,merosin,KIAA4087,mKIAA4087,5830440B04               | 1.59E-07 | 3.19165  |
| BB022070  | L3mbtl3,MBT-1,AI481284,MGC90546                                  | 0.00004  | 2.41238  |
| AK007999  | Krtcap3,Kcp3,AW321088,MGC129450,MGC129451,2010001C09Rik          | 0.00041  | 1.82857  |
| NM_010669 | Krt2-6b,mK6[b],BB144589                                          | 4.39E-11 | 17.08826 |
| NM_008476 | Krt2-6a,MK6a,mK6[a],Krt2-6c,2310016L08Rik                        | 0.00015  | 3.35901  |
| NM_008471 | Krt1-19,K19,EndoC,AI663979,Krt-1.19,MGC25344                     | 0.0001   | 5.03145  |
| AA798563  | Krt1-17,K17                                                      | 6.01E-10 | 2.61581  |
| NM_008469 | Krt1-15,K15,AI528832                                             | 0.00045  | 1.72439  |
| NM_133712 | Klik10,NES1,PRSSL1,2300002A13Rik                                 | 0.00055  | 2.96111  |
| BB126112  | Klhl22,Kelchl,2610318I18Rik                                      | 0.00004  | 1.74877  |
| BB524597  | Klf7,9830124P08Rik                                               | 8.55E-06 | 5.15219  |
| AF072403  | Klf6,FM2,FM6,Zf9,BCD1,CPBP,Copeb,C86813,R75280,lerepo1,lerepo3,A | 0.00008  | 5.5782   |
| BG064841  | Kif7                                                             | 7.95E-12 | 6.86551  |
| BI328541  | Kif5b,KHC,AL022807                                               | 3.18E-08 | 2.54288  |
| AB037923  | Kif13a,KIAA4109,mKIAA4109,4930505I07Rik                          | 0.00002  | 2.74717  |
| AK014353  | Khdrbs3,Etle,Slm2,SLM-2,T-STAR                                   | 2.35E-20 | 10.0688  |
| BE447456  | Khdrbs1,p62,Sam68                                                | 0.00006  | 3.38648  |
| NM_023645 | Kdelc1,EP58,Kdel1,1810049A15Rik,5730416C13Rik                    | 0.00014  | 3.94431  |
| BC006935  | Kctd10,C87062,AW536343,MGC11654                                  | 6.56E-06 | 2.13678  |
| NM_021452 | Kcnmb4,1700058G18Rik,2900045G12Rik                               | 0.00001  | 3.96806  |
| NM_025953 | Kcnk4,TRAAK,TRAAKt,1700019N12Rik,A430107B04Rik                   | 0.00038  | 3.26902  |
| NM_020574 | Kcne3,MiRP2,2210017H05Rik                                        | 0.00041  | 2.95897  |
| BC022962  | Kbtbd2,Bklhd1,BC022962,MGC36672,mKIAA1489                        | 9.72E-06 | 1.56866  |
| NM_030887 | Jundm2,TIF,Jdp2,Jundp2                                           | 0.00048  | 2.25255  |
| NM_010591 | Jun,AP-1,Junc,c-jun                                              | 1.66E-06 | 3.01888  |
| NM_010590 | Jub                                                              | 5.80E-35 | 2.7979   |
| BC006928  | Josd1,MGC6306,MGC101975,mKIAA0063,1300006C06Rik                  | 2.97E-06 | 2.30988  |
| BB494168  | Jmjd3,BC038313,KIAA0346,mKIAA0346,RP23-5O23.5,1700064E03Rik      | 9.80E-07 | 3.695    |
| BC019446  | Jarid1b,PUT1,Plu1,PLU-1,Rb-Bp2                                   | 0.00002  | 4.63168  |
| AU023352  | Jak2,Fd17,C81284,AI504024                                        | 2.42E-07 | 2.02956  |
| AV264681  | Jag2,sm,Serh,D12Ggc2e,mJagged2-1                                 | 0.00032  | 2.02398  |
| AA880220  | Jag1,Htu,Ser-1,slalom,Serrate-1,Headturner                       | 4.73E-16 | 4.63929  |
| AW552407  | Itpk1,BC031182                                                   | 8.67E-07 | 1.94417  |
| NM_022417 | Iitm2c,E25,BRI3,E25C,ITM3,R75508,AU041202,3110038L02Rik          | 0.00066  | 1.54387  |
| AV239969  | Itih5,E130106B02,5430408M01Rik                                   | 8.55E-32 | 15.85079 |

|           |                                                                    |          |         |
|-----------|--------------------------------------------------------------------|----------|---------|
| NM_010580 | Itgb5,[b]5,[b]-5,[b]5A,[b]5B,beta5,ESTM23,beta-5,AA475909,AI874634 | 6.94E-06 | 5.71199 |
| U37029    | Itgb1,CD29,FnrB,gpIIa,AA409975,AA960159,4633401G24Rik              | 0.00001  | 3.81271 |
| AK010892  | Isoc1,2610034N03Rik                                                | 1.69E-09 | 1.96546 |
| BB546077  | Isg20I2,C80587,4930429N24                                          | 0.00014  | 1.85084 |
| NM_018885 | Irx4                                                               | 1.14E-13 | 5.29788 |
| AF295369  | Irx2,IRX6,MGC103290                                                | 0        | 4.61122 |
| AF165984  | Irx1                                                               | 0.00064  | 2.61119 |
| BB345784  | Irs1,IRS-1                                                         | 0.00001  | 1.713   |
| BB183385  | Irf2bp2,E130305N23Rik                                              | 4.97E-06 | 3.16936 |
| AK014712  | Irak1bp1,AIP70,Aabp3,SIMPL,AI851240,4921528N06Rik                  | 0.00038  | 3.13771 |
| AF273672  | Ipo9,Imp9,C78347,Ranbp9,mKIAA1192,0710008K06Rik                    | 7.64E-06 | 2.31391 |
| BB253137  | Inhbb                                                              | 0        | 5.21639 |
| AV287690  | Inadl,Cipp,Patj                                                    | 0.00002  | 1.89385 |
| BC011427  | Ilkap,PP2C-DELTA,0710007A14Rik,1600009O09Rik                       | 4.66E-07 | 2.07937 |
| NM_010562 | Ilk,ESTM24,AA511515                                                | 2.41E-08 | 3.46586 |
| NM_010561 | Ilf3,NF90,MPHOSPH4                                                 | 2.23E-06 | 1.92483 |
| BM235074  | Ilf2,Tex261,Tex267,TEG-267,6230405A16Rik                           | 0.00005  | 3.52853 |
| BI102913  | Il6st,CD130,gp130,AA389424,BB405851,D13ErtD699e,                   | 6.86E-10 | 2.3873  |
| NM_008349 | Il10rb,Crfb4,CRF2-4,Il10r2,D21S58h,IL-10R2,                        | 1.65E-08 | 2.13621 |
| AF317839  | Igsf9,NRT1,Dasm1,Ncam1,644ETD8,mKIAA1355,Kiaa1355-hp               | 0.0008   | 2.85855 |
| AF411055  | Igsf8,PGRL,EWI-2,ESTM34,R75384,AA033172,AU041109                   | 1.05E-10 | 3.44636 |
| BF148825  | Igsf4a,BI2,ST17,Igsf4,Necl2,Tslc                                   | 0.00045  | 6.59285 |
| BB484576  | Igsf3,V7,Cd101,Igsf2,                                              | 3.22E-06 | 3.39189 |
| AI481026  | Igfbp7,Fstl2,mac25                                                 | 2.69E-20 | 2.93379 |
| BC019836  | Igfbp4,Deb2,IGFBP-4,AI875747                                       | 7.49E-30 | 3.52209 |
| BG797580  | Igf2bp3,IMP3,IMP-3,Koc13,mimp3,Neilsen                             | 0.0004   | 1.7323  |
| NM_028680 | Ift57,Hippi,MHS4R2,Esrrb1,4833420A15Rik                            | 0.00004  | 2.10052 |
| BB522265  | Ifnar2,Ifnar-2,AI747302                                            | 0.00004  | 3.61504 |
| NM_010508 | Ifnar1,Ifar,IfrC,CD118,Ifnar,Iifar                                 | 6.00E-16 | 2.72327 |
| BC010291  | Ifitm3,Fgls,IP15,Cd225,mil-1,Cdw217,1110004C05Rik                  | 4.80E-08 | 1.69891 |
| NM_030694 | Ifitm2,mil-3,Ifitm3I,MGC102396,fragilis3                           | 1.11E-22 | 1.87493 |
| BC027285  | Ifitm1,Mil2,MGC107121,1110036C17Rik                                | 2.27E-41 | 4.43275 |
| NM_008332 | Ifit2,Ilf54,AV302338                                               | 0.00033  | 5.89932 |
| AI788952  | Idh1,IDPc,Id-1,Idh-1,AI314845,AI788952,MGC115782,                  | 5.12E-13 | 2.23285 |
| BC008626  | Icam1,CD54,Ly-47,Icam-1,MALA-2,MGC6195                             | 9.70E-11 | 4.76634 |
| BM218697  | Htr2b,5-HT2B,AJ012488,AV377389                                     | 0.00048  | 2.36369 |
| BI154147  | Hspcb,90kDa,Hsp84,Hsp90,C81438,Hsp84-1,AL022974                    | 9.27E-06 | 2.24099 |
| BC013716  | Hsf1,AA960185                                                      | 0.00007  | 2.31919 |
| NM_015818 | Hs6st1,6OST1                                                       | 0.00055  | 2.10629 |
| AV346600  | Hs2st1,Hs2st,AW214369,mKIAA0448                                    | 1.47E-21 | 2.58787 |
| AK020120  | Hrmt1I2,Mrmt1,Prmt1,AW214366,6720434D09Rik                         | 1.46E-10 | 1.53739 |
| AV231755  | Hr,N,AU,ba,hr,rh,ALUNC,rhino,rh-bmh                                | 5.12E-08 | 1.84171 |
| NM_008273 | Hoxd11,Hox-4.6,Hox-5.4                                             | 0.00028  | 2.46109 |
| BF228203  | Hnrpu,SAFA,Sp120,C86794                                            | 2.86E-08 | 3.10327 |
| BB822465  | Hnrpr,hnRNPR,2610003J05Rik                                         | 0.00053  | 3.21306 |
| AI503931  | HnrpII,PHGPx,AI256697,AI852082,2510028H02Rik,2810036L13Rik         | 0.00021  | 2.3257  |
| NM_025279 | Hnrpk,NOVA,hnRNPK,MGC102032                                        | 1.72E-08 | 1.59299 |
| AW412441  | Hnrpf,AA407306,MGC36971,MGC101981,4833420I20Rik                    | 2.86E-13 | 1.79579 |
| AU015266  | Hnrpdl,JKTBP,AA407431,AA959857,hnRNP-DL,D5Wsu145e                  | 6.55E-07 | 1.63308 |
| NM_010448 | Hnrpab,CBF-A,Cgfa,3010025C11Rik                                    | 0.00007  | 2.40013 |
| BG064117  | Hnrpa2b1,Hnrpa2,hnrmp-A,9130414A06Rik                              | 0.0002   | 1.5492  |

|           |                                                          |          |          |
|-----------|----------------------------------------------------------|----------|----------|
| AK007802  | Hnrpa1,Hdp,hnrnp-A1                                      | 1.44E-26 | 1.8727   |
| BC014714  | Hmgcs2,mHS,1300002P16                                    | 2.96E-06 | 14.44425 |
| AV362707  | Hmgcs1,MGC36662,MGC98430,B130032C06Rik                   | 0.00025  | 2.48115  |
| NM_008253 | Hmgb3,Hmg4,Hmg2a                                         | 2.53E-11 | 1.88797  |
| BF166000  | Hmgb1,Hmg1,MGC103168,MGC103169                           | 0.00007  | 1.5889   |
| X58380    | Hmga2,pg,Hmgic,pygmy,HMGI-C,MGC103393,9430083A20Rik      | 1.66E-41 | 27.58577 |
| AI987819  | Hmg20a,lbraf,1200004E06Rik,5730490E10Rik                 | 0.00084  | 2.81322  |
| NM_013820 | Hk2,HKII,AI642394                                        | 2.58E-14 | 3.76658  |
| BB164127  | Hivep3,Rc,Krc,KBP1,Zas3                                  | 3.26E-11 | 2.50491  |
| NM_080846 | Higd1b,2310056K19Rik                                     | 0.00018  | 2.75022  |
| NM_020259 | Hhip,Hip,Hip1,Hhip1                                      | 4.20E-45 | 16.15695 |
| BC018375  | Hes1,Hry                                                 | 0.0001   | 1.88531  |
| BM219313  | Hdlbp,AA960365,AI118566,D1Erd101e,1110005P14Rik          | 0.00022  | 1.82816  |
| NM_010413 | Hdac6,Sfc6,Hdac5,mHDA2                                   | 0.00003  | 5.59809  |
| BQ176116  | Hdac4,AI047285,4932408F19Rik                             | 0.00012  | 2.50998  |
| NM_010407 | Hck,Bmk,Hck-1,AI849071,MGC18625                          | 1.45E-06 | 3.52609  |
| BG864583  | Hcfc1,HCF1,HCF-1,AW060991                                | 3.52E-09 | 2.66677  |
| NM_008216 | Has2                                                     | 0.00014  | 1.87102  |
| BI903743  | H3f3b,H3.3B,9430068D06Rik                                | 5.48E-35 | 1.65125  |
| BC028539  | H2afv,H2av,C530002L11Rik                                 | 9.13E-16 | 1.69163  |
| NM_010368 | Gusb,g,Gur,Gus,Gut,asd,Gus-r,Gus-s,Gus-t,Gus-u,AI747421  | 0.00015  | 2.02572  |
| BF144687  | Gulp1,Ced6,GULP,CED-6,3110030A04Rik,5730529O06Rik        | 8.84E-06 | 2.30336  |
| AI987834  | Gtpbp4,NGB,Crfg,Gtpbp3,2610028C09Rik                     | 0.0008   | 2.31551  |
| AK011217  | Gtl3,T10-2A2,AL024127,2600014O15Rik                      | 3.75E-20 | 3.31274  |
| AV297256  | Gtf3c2,                                                  | 0.00024  | 1.56216  |
| AF343349  | Gtf2ird1,BEN,GTF3,ESTM9,Cream1,Gtf2il,                   | 5.07E-37 | 6.65538  |
| NM_010358 | Gstm1,Gstb1,Gstb-1                                       | 0.00005  | 2.11198  |
| M86736    | Grn,epithelin                                            | 6.14E-07 | 1.79024  |
| BC004783  | Grhl2,BOM,Tcfcp2l3,0610015A08Rik                         | 9.55E-10 | 1.68017  |
| AV373997  | Greb1,AF180470,AU023194,mKIAA0575,9130004E13,            | 0.00004  | 4.61529  |
| BB071890  | Grasp,tamalin                                            | 1.21E-07 | 2.40157  |
| BC019379  | Gprk5,GRK5                                               | 0.00065  | 2.58796  |
| BC020004  | Gprc5b,Raig2,AW125761                                    | 0.00004  | 13.21231 |
| BF159976  | Gpr56,Cyt28,TM7LN4,TM7XN1                                | 2.04E-08 | 2.06997  |
| BG073622  | Gpr161,Gm208,Gm208Gpr                                    | 0.00001  | 2.64521  |
| BC019649  | Gpr125,AU044632,3830613O22Rik                            | 2.55E-11 | 1.6626   |
| NM_030701 | Gpr109a,HM74,Pumag,PUMA-G,mHM74b,Gpr109b                 | 1.06E-09 | 6.21517  |
| AV301998  | Gpiap1,P137,Gpiap,AL022980,MMGPIP137                     | 4.13E-12 | 1.98328  |
| NM_010274 | Gpd2,GPDH,Gdm1,Gpd-m,Gpdh-m,TISP38,                      | 0.00054  | 1.66522  |
| BC006622  | Gpc4,AF311610,AI385680,AI661372,K-glypican,9530073D23Rik | 3.71E-10 | 2.30678  |
| AW107802  | Gpc3,OCI-5                                               | 1.20E-16 | 6.87232  |
| U82470    | Got2,Got-2,mAspAT,FABP-pm,AL022787,MGC102129             | 1.44E-07 | 1.74559  |
| AA792094  | Got1,Got-1,cAspAT,AI789014                               | 0.0009   | 2.22023  |
| NM_016810 | Gosr1,GS28,GOSRI,GOS-28,AI414660,AI426320,BB145494       | 0.0001   | 1.72383  |
| BC027194  | Golph3l,C77637,GPP34R                                    | 0.00009  | 2.37874  |
| BC011152  | Golph2,GP73,                                             | 4.67E-06 | 2.03949  |
| AK008566  | Gnpnat1,EMeg32,Gpnat1,Gsnpat,AU017428,AU040593           | 0.00001  | 1.82896  |
| AK014950  | Gnpda2,Gnp2,Sb52,GNPDA,                                  | 9.90E-09 | 1.54723  |
| BC016135  | Gnb5,GBS,flr,Gbeta5                                      | 0.00013  | 1.91315  |
| BG069873  | Gnb1l,Wdr14,Wdvcf,ESTM55                                 | 0.00082  | 4.48922  |
| BG071068  | Gnb1,Gnb-1,C77571,AA409223,MGC98074                      | 2.93E-16 | 1.64273  |



|           |                                                           |          |          |
|-----------|-----------------------------------------------------------|----------|----------|
| NM_138658 | Gnas,P1,P2,P3,GSP,Gsa,POH,GPSA,Nesp,Gnas1,Nespl,          | 8.30E-11 | 2.26628  |
| AV154513  | Gnaq,Gq,Dsk1,Dsk10,Galphaq                                | 0.00064  | 1.96725  |
| BF228116  | Gnai2,Gia,C76432,Gnai-2,Galpha2                           | 0.00002  | 1.67092  |
| BI662324  | Gna13,AU024132,AU043124,Galpha13                          | 9.85E-15 | 2.98383  |
| NM_010301 | Gna11,Dsk7,E430025L19                                     | 3.54E-06 | 2.29341  |
| BG065841  | Gm944,KIAA4238,mKIAA4238                                  | 0.00035  | 4.46759  |
| AV003728  | Gm1818                                                    | 1.02E-07 | 2.31103  |
| AI391218  | Glul,GS,Glns                                              | 8.69E-06 | 2.80506  |
| BI329832  | Glud1,Glud,Gdh-X,Gludl,AI118167                           | 3.46E-08 | 1.67071  |
| BC017637  | Gltscr2,AW536441,5330430H08Rik,9430097C02Rik              | 0.00001  | 2.57969  |
| AW546128  | Gli2,AW546128                                             | 5.89E-22 | 13.40546 |
| NM_010296 | Gli1,Zfp5,Zfp-5,AV235269                                  | 4.90E-11 | 8.59718  |
| BB795216  | Glg1,CFR,CFR-1,ESL-1,MG160,Selel,MG-160,AI593353,AW537898 | 0.00021  | 2.74482  |
| NM_019832 | Gkap1,42kDa,Gkap42,4933400B15Rik                          | 6.98E-10 | 2.38798  |
| AW413620  | Gig1,C030026M03,C030034L19Rik                             | 0.00091  | 4.92834  |
| BB364131  | Ghr,GHBP,GHR/BP,AA986417                                  | 0.00044  | 4.03896  |
| BB284482  | Gfra2                                                     | 1.79E-27 | 14.79898 |
| AV354240  | Gfra2                                                     | 2.25E-08 | 5.20215  |
| U10551    | Gem,AV020497                                              | 1.44E-06 | 5.95584  |
| AK013104  | Gdi2,GDIB,Gdi3,GDI-B                                      | 0.00092  | 1.7292   |
| BC019374  | Gclc,Glcl,GLCL-H,Ggcs-hs,D9Wsu168e                        | 1.23E-08 | 2.98079  |
| AF411837  | Gatad2b,P66beta,AL118180,KIAA1150,mKIAA1150,C430014D17Rik | 2.83E-16 | 7.87108  |
| BB550400  | Gas1,Gas-1,AW554192                                       | 4.44E-06 | 1.51185  |
| AU067654  | Garnl4,Gm1561,AU067654,MGC130388,mKIAA1039,RP23-20M18.15  | 3.65E-30 | 6.03505  |
| NM_008060 | Ganab,G2an,Glull,AU042638,mKIAA0088                       | 0.00012  | 1.723    |
| AV238718  | Galnt4,BC024988,MGC32465,2900011G21Rik                    | 0.00036  | 1.89168  |
| AK019995  | Galnt3                                                    | 0.00016  | 1.7522   |
| BG064057  | Galnt2,AI480629                                           | 7.83E-06 | 3.67007  |
| AV376137  | Galnt12,9130206E10,A630062B03Rik                          | 0.0001   | 3.94946  |
| BM217066  | Galnt1                                                    | 1.92E-06 | 2.89915  |
| AV307219  | Galm,AU015645,AU020959,A530057M15Rik                      | 0.00057  | 2.5842   |
| NM_021356 | Gab1,AA408973,AW107238                                    | 8.49E-06 | 4.19814  |
| BM234433  | G431001E03Rik                                             | 2.04E-06 | 2.74424  |
| NM_008057 | Fzd7,Fz7                                                  | 1.14E-10 | 2.59159  |
| BB371406  | Fzd2,Fzd10,Mfz10,Mfz10a,AW456835                          | 4.97E-08 | 4.73767  |
| AB032010  | Fxyd6,Php,0610030I18Rik                                   | 1.04E-06 | 3.77289  |
| NM_008053 | Fxr1h,Fxr1,Fxr1p,1110050J02Rik,9530073J07Rik              | 0.00029  | 1.50133  |
| AF224264  | Fus,Tls,Fus1,D430004D17Rik,D930039C12Rik                  | 4.92E-10 | 4.38153  |
| NM_011046 | Furin,Fur,PACE,SPC1,Pcsk3                                 | 1.59E-07 | 1.63349  |
| BB390817  | Fuk,AI303278,1110046B12Rik                                | 0.00041  | 2.67664  |
| BB488001  | Fubp1,FBP,Fubp,Fubp4,D3ErtD330e,9530027K12Rik             | 0.00013  | 3.52647  |
| NM_011936 | Fto,AW743446,mKIAA1752                                    | 0.00009  | 1.86618  |
| NM_008049 | Ftl2,Ftl,Ftl-2                                            | 1.29E-06 | 2.0572   |
| NM_010240 | Ftl1,Ftl,Ftl-1,MGC102130,MGC102131,MGC118079,MGC118080    | 1.14E-24 | 2.82393  |
| BB540658  | Fstl1,Fstl,TSC-36,AI316791,AW107808                       | 1.41E-08 | 2.38698  |
| NM_008046 | Fst                                                       | 0.00042  | 4.64214  |
| NM_007984 | Fscn1,Fan1,AI663989                                       | 7.63E-21 | 2.61393  |
| U91905    | Frzb,Frp,Sfrp3,fritz,frzb-1,frezzled                      | 8.68E-10 | 20.27516 |
| BB831042  | Frk,BSK,GTK,RAK,C85044,BSK/IYK                            | 0.00019  | 2.85094  |
| BI452538  | Frem1                                                     | 3.35E-07 | 4.07221  |
| AI462296  | Foxo1,Afxh,FKHR,Fkhr1,Foxo1a,AI876417                     | 3.84E-15 | 2.96041  |

|           |                                                                 |          |          |
|-----------|-----------------------------------------------------------------|----------|----------|
| BB662927  | Foxd1,BF-2,Hfh10,FREAC4,Hfhbf2,AI385632                         | 1.44E-24 | 4.81504  |
| AK005500  | Fndc3b,Fad104,AW550168,KIAA4164,mKIAA4164,1600019O04Rik         | 0.00009  | 2.8158   |
| BC022140  | Fndc3a,Fndc3,D14Ert453e,1700094E19Rik,F730017H24Rik             | 0.00008  | 1.92926  |
| BG064340  | Fnbp3,FBP11,Fnbp11,2810012K09Rik                                | 3.04E-06 | 4.43675  |
| AW548221  | Fnbp1l,TOCA1,AW548221,MGC30506,2610318I01Rik                    | 2.04E-38 | 1.69982  |
| AW555664  | Flrt2                                                           | 7.42E-07 | 1.9591   |
| BB118974  | Flot2,Esa,AI573412                                              | 4.00E-09 | 2.88695  |
| BM218614  | Flnb,AL024016                                                   | 0.00047  | 3.68315  |
| BM233746  | Flna,Fln1,ABP-280,F730004A14Rik                                 | 9.03E-06 | 2.26058  |
| NM_022009 | Fliih,Flil1,3632430F08Rik                                       | 0.00057  | 1.57023  |
| BB456860  | Fkbp4,p59,59kDa,FKPB52,FKBP-52,AL022792,AW208983                | 0.00025  | 1.86921  |
| AF483488  | Fkbp1a,Fkbp,12kDa,Fkbp1,FKBP12,mFKBP1,mFKBP12                   | 1.42E-09 | 2.25336  |
| AF126746  | Fiz1,AI790204,FLJ00416,MGC117900,mFLJ00416                      | 0.00014  | 1.78328  |
| NM_008016 | Fin15                                                           | 0.00024  | 1.63531  |
| BF136544  | Fgl2,AI385601,musfiblp                                          | 5.60E-07 | 2.46987  |
| BB732903  | Fgfr3,HBGFR,Fgfr-3                                              | 4.21E-11 | 2.79252  |
| M33760    | Fgfr1,FLG,Flt-2,Fgfr-1,AW208770                                 | 1.07E-08 | 5.34213  |
| AV240088  | Fgf5,go,Fgf-5,angora                                            | 9.78E-06 | 12.51166 |
| BM206792  | Fez2,9030616F16,D17Ert4315e                                     | 0.00037  | 2.13079  |
| NM_007999 | Fen1,AW538437                                                   | 6.45E-06 | 1.98365  |
| BB752524  | Fem1c,AI646567,2610312A07Rik,3632443A22Rik                      | 0.00041  | 1.85469  |
| NM_010189 | Fcgrt,FcRn                                                      | 4.17E-09 | 2.62804  |
| NM_013908 | Fbxw5,Fbw5,AI159739                                             | 0.0002   | 2.62678  |
| BE854125  | Fbxw2,MD6,FBW2,Fwd2                                             | 0.00091  | 2.69253  |
| AF441120  | Fbxo32,MAFbx,AI430017,ATROGIN1,atrogin-1,4833442G10Rik          | 1.26E-06 | 4.76859  |
| BG076338  | Fbxo21,AU016673,MGC28066,mKIAA0875,2810425J22Rik                | 0.00014  | 3.33208  |
| AV010392  | Fbn2,sy,sne,Fib-2,BC063774,KIAA4226,mKIAA4226                   | 4.20E-14 | 7.82875  |
| NM_011812 | Fbln5,A55,EVEC,DANCE                                            | 1.07E-06 | 1.82115  |
| BF228318  | Fbln2                                                           | 3.23E-08 | 3.53968  |
| BG070068  | Fblim1,Cal,Gt10,2410043F08Rik                                   | 0.00002  | 2.6972   |
| AK020164  | Fars2,Fars1,2810431B21Rik,6720478K01Rik                         | 0.00063  | 2.73845  |
| BB097480  | Farp1,Cdep,AW228844,BC030329                                    | 0        | 5.98684  |
| BB380312  | Falz,MGC54978,9430093H17Rik                                     | 1.07E-17 | 2.48821  |
| BB229957  | Fads2,Fadsd2,2900042M13Rik                                      | 1.27E-06 | 4.68006  |
| BC026831  | Fads1,DSD,AI317215,MGC37858,0710001O03Rik,A930006B21Rik         | 4.53E-07 | 2.53277  |
| BQ173958  | F2r,Cf2r,Par1,ThrR,AI482343,MGC28086                            | 2.42E-07 | 2.27007  |
| BC021876  | F11r,JAM,Jcam,JAM-1,JAM-A,Jcam1                                 | 0.00004  | 1.50305  |
| BG071142  | Extl3,Extl1,AU040105,KIAA0519,mKIAA0519,2900009G18Rik           | 4.96E-06 | 2.61828  |
| NM_010163 | Ext2,AI893565                                                   | 5.48E-06 | 1.93198  |
| BM231698  | Ext1,AA409028                                                   | 1.15E-11 | 3.35331  |
| BM219113  | Exosc10,p2,p3,p4,RRP6,PM-ScI,Pmscl2,PM/ScI-100                  | 0.00003  | 3.28752  |
| BB699868  | Ewsr1,Ews,Ewsh,AU018891                                         | 0.00069  | 1.62651  |
| AW553781  | Evl,AI528774                                                    | 0        | 5.70563  |
| BC005486  | Ets2,Ets-2,AU022856                                             | 9.17E-07 | 1.59627  |
| BB151715  | Ets1,Tp11,Ets-1,MGC18571,p42Ets-1,p51Ets-1,5' domain,D230050P06 | 4.22E-08 | 2.69982  |
| BC010592  | Ethe1,Hsco,MGC102424,0610025L15Rik                              | 1.84E-11 | 5.57097  |
| NM_007956 | Esr1,ERa,ESR,Estr,ER[a],Estra,Nr3a1,ERalpha,AA420328,AU041214   | 0        | 15.5853  |
| NM_016903 | Esd,Es10,Es-10,sid478                                           | 5.24E-10 | 1.63361  |
| BB071632  | Erh,Mer,Prei1,MGC103398,MGC130271,MGC130272                     | 1.53E-08 | 2.12011  |
| BM240030  | Erbp2ip,Erbin,mKIAA1225,1700028E05Rik                           | 0.00002  | 4.55361  |
| AI505281  | Eral1,Era,MERA-S,MERA-W,AU019798,2610524P08Rik,                 | 2.81E-07 | 1.96461  |

|           |                                                          |          |          |
|-----------|----------------------------------------------------------|----------|----------|
| BC014822  | Ephb3,Etk2,HEK2,MDK5,Sek4,Cek10,Tyro6,AW456895           | 0.00045  | 2.15679  |
| AI385584  | Epha4,rb,Sek,Cek8,Hek8,Sek1,Tyro1,AI385584,2900005C20Rik | 3.44E-06 | 5.75192  |
| NM_023580 | Epha1,Eph,Esk,AL033318,5730453L17Rik                     | 0.00044  | 1.88283  |
| NM_019427 | Epb4.1I4b,Ehm2,AA589614,AU021054,BB007528,D4ErtD346e     | 1.68E-20 | 1.70377  |
| AI595744  | Eny2,DC6,Ey2,6720481I12,1810057B09Rik                    | 0.00027  | 2.90278  |
| AV117919  | Entpd1,Cd39,AA408691,NTPDase-1,2610206B08Rik             | 0.00023  | 4.29363  |
| BC003264  | Enpp2,ATX,Npps2,Pdnp2,Autotaxin,PD-lalpha                | 3.02E-11 | 5.96466  |
| NM_023119 | Eno1,Eno-1,MBP-1,AL022784,MGC103111,MGC107267,0610008I15 | 0.00003  | 1.73656  |
| AV329519  | Enah,Mena,WBP8,Ndpp1,AI464316,AW045240                   | 7.51E-06 | 2.67226  |
| BB188266  | Elk4,Sap1,BB162516,2310011G17Rik,A130026I01Rik           | 6.06E-06 | 3.55515  |
| BB825801  | Elk3,Erp,Net,Etrp,Sap-2,D430049E23Rik                    | 2.00E-09 | 5.93391  |
| AK011870  | Elavl1,HUR,Hua,W91709,2410055N02Rik                      | 0.00008  | 1.64662  |
| NM_007918 | Eif4ebp1,PHAS-I,AA959816                                 | 0.00093  | 1.88718  |
| BC027014  | Eif4e3,eIF4E-3,AI451927,1300018P11Rik                    | 2.55E-06 | 2.47447  |
| BB858329  | Eif3s8,110kDa,NipilA3,MGC36637,NIPIL(A3),3230401O13Rik   | 6.43E-06 | 2.42594  |
| AK002778  | Eif3s5,AA409853,MGC90606,0610037M02Rik                   | 0.00003  | 1.71011  |
| BI412952  | Ehmt2,G9a,Bat8,NG36,D17ErtD710e                          | 0.00001  | 5.51845  |
| X06746    | Egr2,Egr-2,Zfp-6,Krox20,NGF1-B,Zfp-25,Krox-20            | 0.00007  | 1.79641  |
| NM_007913 | Egr1,egr,TIS8,Zenk,Egr-1,NGFIA,Zfp-6                     | 0.00002  | 2.96283  |
| NM_019397 | Egfl6,Maeg                                               | 6.66E-27 | 10.40165 |
| BB315355  | Eftud2,116kDa,Snrp116,U5-116kD                           | 0.0001   | 1.64965  |
| D38146    | Efna1,B61,Epl1,EFL-1,Eplg1,Lerk1,LERK-1,AI325262         | 3.94E-07 | 2.91415  |
| AK007560  | Efhd2,AA408606,D4Wsu27e,2600015J22Rik                    | 0.00046  | 2.15538  |
| BF100813  | Ednrb,s,ETb,ET-B,ET>B<,Sox10m1,AU022549                  | 3.34E-09 | 2.35649  |
| AW558570  | Ednra,ETa,ET-AR,Gpcr10                                   | 3.66E-11 | 10.80432 |
| NM_007902 | Edn2,VIC                                                 | 2.67E-15 | 8.6371   |
| D43775    | Edn1,ET-1,preproET                                       | 4.95E-18 | 5.17324  |
| BG073486  | Edd1,Edd,C77315,AW549941,                                | 6.52E-07 | 1.5222   |
| BC025104  | Echdc2,D4ErtD765e,1300017C12Rik,2610009M20Rik            | 0.00002  | 2.52226  |
| AI551117  | Ece1,ECE-1a,ECE-1b,ECE-1d,AW322500                       | 0.00003  | 4.13471  |
| BB125261  | Ebf1,Ebf,Olf1,O/E-1,Olf-1,AW990631,9830166E18Rik         | 2.14E-23 | 6.43409  |
| NM_011816 | E430034L04Rik,G3BP,G3BP2,AA409541,KIAA0660,mKIAA0660     | 8.25E-08 | 2.7115   |
| BM119343  | E430012K20Rik,AI662170,KIAA1223,mKIAA1223,mKIAA3019      | 0.00004  | 2.1381   |
| NM_033270 | E2f6,EMA,E2F6b,AI462434                                  | 0.00064  | 1.7121   |
| AK017359  | E230022H04Rik,AU022236,AU040755                          | 0.0002   | 3.14869  |
| BB308071  | E130306M17Rik                                            | 0.00007  | 7.54287  |
| BI412259  | E130112L23Rik,Gm669                                      | 0.00013  | 3.35706  |
| BF453911  | E030031F02Rik                                            | 0.0006   | 1.68375  |
| BC006704  | Dyrk3,BC006704                                           | 1.42E-06 | 2.84597  |
| BC023347  | Dync1I1,LIC-1,Dncl1c1,MGC32416,1110053F02Rik             | 0.00045  | 2.44304  |
| NM_026268 | Dusp6,MKP3,MKP-3,PYST1,MGC98540,1300019I03Rik            | 0.00002  | 3.58837  |
| AK012530  | Dusp4,AI844617,BB104621,2700078F24Rik,E130306H24Rik      | 7.39E-08 | 3.44731  |
| BB121278  | Dusp16,MKP7,MKP-7,AW558566,D6ErtD213e,3830417M17Rik      | 2.52E-07 | 2.18711  |
| NM_022019 | Dusp10,MKP-5,AI158871,2610306G15Rik                      | 0.00061  | 2.37469  |
| BB150886  | Dst,ah,dt,Bpag,BP230,Bpag1,Macf2,                        | 0.00029  | 1.86442  |
| BB365998  | Dsc3                                                     | 8.01E-07 | 8.31299  |
| BG067113  | Dpp7,QPP,Dpp2,DPPII                                      | 0.00062  | 2.90579  |
| NM_007876 | Dpep1,MBD,AI327012                                       | 0.00048  | 4.51238  |
| BB795072  | Dock9,AA959601,AW538057,Zizimin1,D14Wsu89e,              | 2.28E-18 | 3.59298  |
| NM_026082 | Dock7,Gm430,mKIAA1771,3110056M06Rik                      | 2.11E-08 | 1.61989  |
| NM_133763 | Dnttip1,6430706C13Rik                                    | 1.66E-09 | 2.03371  |

|           |                                                           |          |         |
|-----------|-----------------------------------------------------------|----------|---------|
| L31397    | Dnm1,Dnm,AI838169,KIAA4093,mKIAA4093                      | 3.03E-06 | 4.06782 |
| AK012029  | Dnajc5,Csp,AU018536,2610314I24Rik                         | 0.00003  | 3.53266 |
| NM_007869 | Dnajc1,MTJ1,ERdj1,Dnajl1,                                 | 0.00024  | 1.71769 |
| AK005680  | Dnajb6,Mrj,mDj4,MGC102124                                 | 8.95E-06 | 2.95388 |
| BB085328  | Dmd,mdx,pke,Dp427,DXSmh7,DXSmh9                           | 2.44E-13 | 4.74482 |
| BQ176806  | Dlgh1,SAP97,KIAA4187,mKIAA4187,B130052P05Rik              | 1.88E-06 | 2.53795 |
| BC021314  | Dlg5,T25557,mKIAA0583,4933429D20Rik                       | 1.01E-10 | 2.15119 |
| BB758432  | Dixdc1,Ccd1,Ccd1CL,                                       | 0.00042  | 4.52873 |
| AF177196  | Dio2,AI324267                                             | 0.00008  | 9.36094 |
| U91922    | Dhx9,RHA,Ddx9,NDHII,NDH II,AI326842,MGC90954              | 9.22E-07 | 2.6545  |
| AK010512  | Dhx40,PAD,DDX40,ARG147,2410016C14Rik                      | 6.93E-08 | 2.17421 |
| C76277    | Dhx36,Ddx36,AI452301,AU022184,mKIAA1488,2810407E23Rik     | 4.54E-10 | 5.11733 |
| AK004665  | Dhx35,Ddx35,1200009D07Rik                                 | 3.51E-10 | 2.69642 |
| BB397009  | Dhx29,Ddxx,AU043276,37324215M03,E130202M19Rik             | 0.00028  | 1.59906 |
| BC014860  | Dgkz,mDGK[z],E130307B02Rik                                | 4.57E-18 | 2.96847 |
| BC023016  | Dennd1a,MGC38995,6030446I19Rik                            | 7.28E-09 | 6.75835 |
| NM_016874 | Deaf1,NUDR,AU042387,suppressin,C230009B13Rik              | 0.00063  | 2.48702 |
| BF226295  | Ddx6,HLR2,mRCK/P54,E230023J21Rik                          | 1.72E-06 | 2.4162  |
| AK010484  | Ddx54,DP97,AI414901,2410015A15Rik                         | 0.00088  | 2.63475 |
| BC009142  | Ddx5,p68,Hlr1,G17P1,HUMP68,MGC118083,2600009A06Rik        | 8.80E-13 | 2.04587 |
| NM_138669 | Ddx48,MGC6664,MGC6715,mKIAA0111,2400003O03Rik             | 3.30E-06 | 1.5295  |
| BM247253  | Ddx42,RHELP,RNAHP,SF3b125,                                | 0.00003  | 1.55671 |
| BC011308  | Ddx41,ABS,AA958953,AI324246,2900024F02Rik                 | 0.0004   | 2.44253 |
| L25126    | Ddx3x,Ddx3,Fin14,D1Pas1-rs2                               | 0.00001  | 3.28096 |
| BB381966  | Ddx26,HDB,DICE1,Notch2I,AI480962,2900075H24Rik            | 2.57E-06 | 2.97007 |
| AK017926  | Ddit4,dig2,REDD1,Rtp801,AA415483,5830413E08Rik            | 2.53E-06 | 1.89776 |
| NM_015735 | Ddb1,127kDa,AA408517,p127-Ddb1                            | 0.00008  | 1.76088 |
| NM_016765 | Ddah2,G6a,Ddah,NG30,AU019324,AW413173,1110003M04Rik       | 0.00051  | 1.99271 |
| AW556888  | Ddah1,AI987801,AW050362,2410006N07Rik,2510015N06Rik       | 6.41E-09 | 2.96706 |
| AW105916  | Dcamk1I,DCLK,Cpg16,mKIAA0369,1700113D08Rik,2810480F11Rik  | 1.71E-06 | 4.84588 |
| NM_133188 | Dazap1,mPrp,2410042M16Rik                                 | 6.23E-06 | 2.03436 |
| NM_007829 | Daxx                                                      | 0.00039  | 2.22733 |
| BC021490  | Dapk1,AI642003,D13Ucla1,DAP-Kinase,2310039H24Rik          | 4.35E-07 | 1.88918 |
| BM195829  | D8Erttd82e,FLJ00269,MGC100334,mFLJ00269,9830148H23        | 1.44E-06 | 2.52365 |
| U94988    | D8Erttd325e,Nulp1,mKIAA1049,1100001J13Rik,1810041K11Rik   | 0.00008  | 1.87311 |
| BG066910  | D530037H12Rik,C79576                                      | 0.00008  | 3.69904 |
| BB496399  | D430043L16Rik,Gm724                                       | 2.01E-07 | 3.43102 |
| BB482650  | D430015B01Rik,Precm1,FAM13A1,AI462012                     | 0.0007   | 2.6463  |
| BB532898  | D330040H18Rik                                             | 2.92E-15 | 4.20192 |
| NM_133825 | D1Erttd622e,AI987691,AW047450                             | 5.43E-17 | 2.81543 |
| NM_018872 | D1Bwg0491e,Neg,RW1,CC28,YR-23,mKIAA0257,2610524E03Rik     | 3.08E-09 | 1.81088 |
| AK016771  | D19Erttd678e,4933411H20Rik,6720480F16Rik                  | 0.0006   | 2.96321 |
| BB051286  | D19Erttd678e,4933411H20Rik,6720480F16Rik                  | 0.00014  | 2.6113  |
| AV307337  | D17Wsu104e,Il25,Ly6elg,SF20/IL-25                         | 0.00013  | 2.19823 |
| BB368203  | D17Erttd663e                                              | 0.00015  | 1.89401 |
| NM_028003 | D15Erttd682e,2310042P20Rik                                | 0.00002  | 3.44479 |
| AV114522  | D15Erttd366e,Eplin,1110021C24Rik,3526402A12Rik            | 7.85E-08 | 5.72008 |
| AV304373  | D14Erttd231e,BC028953                                     | 8.25E-06 | 1.82055 |
| BE456208  | D12Erttd551e,CHR2SYT,KIAA1228,2410017M09Rik,4921504I16Rik | 0.00046  | 4.26029 |
| AK005026  | D10Ucla1,Reep3                                            | 0.00009  | 3.1941  |
| AU014694  | D10Erttd610e,GEFT,2410008H17Rik                           | 0.0001   | 3.00258 |

|           |                                                          |          |          |
|-----------|----------------------------------------------------------|----------|----------|
| BC025490  | D030060M11Rik,AV305342,MGC38070                          | 2.18E-07 | 5.56987  |
| AK004699  | Cyp2s1,C79779,AU041727,1200011C15Rik                     | 1.76E-07 | 2.27061  |
| BM119774  | Cyp27b1,Vdr,Cp2b,Cyp1,Pddr,Vddr,Vddr,Cyp40,Vddr1,Cyp27b  | 6.31E-08 | 11.91993 |
| AK018713  | Cyba,b558                                                | 0.0001   | 2.45596  |
| NM_029787 | Cyb5r3,Dia1,Dia-1,C85115,0610016L08Rik,2500002N19Rik     | 7.35E-11 | 2.82871  |
| BE133856  | Cyb561                                                   | 0.00005  | 5.0834   |
| AK015150  | Cxxc5,MGC101987,4930415K17Rik                            | 2.54E-08 | 3.55823  |
| BC003436  | Cxx1a,Mart8b,1110012O05Rik                               | 0.00033  | 1.98107  |
| D87747    | Cxcr4,CD184,LESTR,Cmkar4,PB-CKR,PBSF/SDF-1               | 1.50E-06 | 2.71539  |
| BI412951  | Cugbp1,CUGBP,NAB50,CUG-BP,HNAB50,Brunol2,                | 0.00014  | 2.09384  |
| NM_022325 | Ctsz,CTSX,AI787083,AU019819,D2Wsu143e                    | 8.01E-13 | 3.52352  |
| NM_021281 | Ctss                                                     | 0.00081  | 2.14626  |
| M14222    | Ctsb                                                     | 0.00006  | 2.392    |
| NM_018737 | Ctps2,CTPsH                                              | 2.03E-10 | 2.52711  |
| NM_007615 | Ctnnd1,P120,Catns,Ctnnd,AA409437,AU019353,mKIAA0384      | 1.07E-08 | 1.91721  |
| BI134907  | Ctnnb1,Mesc,Catnb                                        | 1.65E-09 | 6.77116  |
| BG064656  | Ctla2b,Ctla-2b,AW545568                                  | 2.38E-06 | 3.61393  |
| NM_007796 | Ctla2a,Ctla-2a                                           | 2.56E-07 | 2.18691  |
| NM_010217 | Ctgf,Hcs24,Fisp12,fisp-12                                | 2.93E-09 | 2.05138  |
| BB836888  | Ctcf,AW108038                                            | 7.62E-06 | 2.17255  |
| NM_009980 | Ctbp2,Ribeye,AA407280,D7Ert45e                           | 4.32E-11 | 2.36466  |
| NM_007793 | Cstb,Stfb,AA960480                                       | 0.00006  | 1.50494  |
| BF124540  | Csrp1,CRP1,Csrp,AA408841,AA959891,AW545626               | 0.00088  | 2.02519  |
| BB377873  | Cspg4,AN2,NG2,4732461B14Rik                              | 2.66E-21 | 10.82412 |
| BB804298  | Cspg3,Ncan,Tgfbt,neurocan,C230035B04                     | 0.00097  | 2.42853  |
| NM_019389 | Cspg2,NG2,hdf,PG-M(V0),PG-M(V1),9430051N09,5430420N07Rik | 2.82E-17 | 6.2014   |
| BB283759  | Csnk2a1,MGC102141,Csnk2a1-rs4                            | 0.00084  | 2.05567  |
| AI326320  | Csnk1g2,AI463719,2810429I12Rik                           | 0.0008   | 1.99871  |
| BE952001  | Csnk1e,tau,CKIe,AI426939,AI551861,AW457082,KC1epsilon    | 7.78E-07 | 2.20902  |
| BB292252  | Csf1r,Fms,CD115,Csfmr,Fim-2,CSF-1R,M-CSFR,AI323359       | 0.00083  | 3.92271  |
| BB793369  | Cryz,Sez9                                                | 0.00003  | 2.20591  |
| AI429792  | Crtc3,TORC3                                              | 0.00013  | 3.41079  |
| AK013854  | Crsp3,ESTM7,Med23,130kDa,X83317,mKIAA1216,3000002A17Rik  | 1.93E-16 | 2.55982  |
| AW541802  | Crkl,Crkl,AA589403,AI325100,1110025F07Rik                | 3.15E-06 | 1.86772  |
| BB795494  | Crk7,Pksc,CrkRS,AI646528,1810022J16Rik                   | 6.44E-06 | 1.85335  |
| BF020879  | Crk,Crk3,Crko,Crk-I,Crkl,Crk-II,CrkIII,Crk-III           | 0.00012  | 1.84095  |
| BE693025  | Crispld1,Lcrisp1,Cocoacrisp                              | 5.63E-31 | 23.17855 |
| NM_007763 | Crip1,CRHP,CRP1,Crip                                     | 4.71E-18 | 2.32856  |
| BQ126564  | Crim2,KCP,Gm793,AW060220                                 | 0.00003  | 1.72371  |
| BM206467  | Crim1,AU015004                                           | 5.49E-11 | 5.46698  |
| BC010712  | Cri1,EID1,EID-1,ORF12,PTD014,PNAS-22,2610002K20Rik       | 1.19E-16 | 2.91968  |
| AI118522  | Creb5,D430026C09Rik                                      | 4.88E-17 | 6.19126  |
| AV021105  | Creb3l2,BBF2H7,C530025K05Rik                             | 5.05E-12 | 3.90119  |
| NM_019696 | Cpxm1,Cpx1,Cpxm,Cpx-1,AA986902                           | 6.14E-21 | 12.14038 |
| BM239527  | Cpsf2,Cpsf,MCPSF,100kDa,AI662483,mKIAA1367,2610024B04Rik | 0.00092  | 1.58403  |
| BC010197  | Cpe,CPH,fat,Cph1,Cph-1,R74677,MGC7101                    | 1.37E-17 | 2.94595  |
| NM_007754 | Cpd,AA960140,AW322530,D830034L15Rik                      | 8.85E-07 | 2.96413  |
| AK009614  | Cox7a2l,EB1,SIG81,COX7AR,COX7RP,SIG-81,Silg81,MGC103208  | 8.68E-10 | 1.99886  |
| BC024686  | Copg,Copg1,AU019265,BC056168,D6Wsu16e,MGC66965,D6Ert471e | 0.00004  | 2.77108  |
| BG074456  | Col9a3,AV006866                                          | 9.27E-07 | 6.72357  |
| AF064749  | Col6a3,Col6a-3,AI507288                                  | 0.00002  | 1.93404  |

|           |                                                        |          |          |
|-----------|--------------------------------------------------------|----------|----------|
| BI455189  | Col6a2,Col6a-2,MGC36205                                | 2.32E-09 | 1.79576  |
| NM_009933 | Col6a1,Col6a-1,AI747156                                | 1.70E-11 | 1.64615  |
| BC013560  | Col4a2,Col4a-2,MGC7371,AU019502,canstatin              | 0        | 4.14544  |
| BF158638  | Col4a1,Col4a-1                                         | 0        | 4.55148  |
| BB044654  | Col27a1,AI449266,mKIAA1870,5730512J02Rik               | 0.00005  | 10.73791 |
| BE290548  | Col23a1,AI429655,2810458L13Rik                         | 6.02E-11 | 4.20923  |
| D17546    | Col18a1,endostatin                                     | 0.00059  | 1.5188   |
| AF011450  | Col15a1                                                | 0.00002  | 2.40148  |
| BB521934  | Col14a1,AW108078,5730412L22Rik                         | 4.61E-13 | 3.1685   |
| BB836814  | Col11a1,cho                                            | 0        | 4.05357  |
| NM_016706 | Coil,Cln80,C79982,MGC37472,p80-coilin                  | 0.00014  | 2.68561  |
| AA238341  | Cog1,Ldlb,KIAA1381,mKIAA1381,6030445I15                | 0.00057  | 1.54553  |
| NM_016673 | Cntfr,Cntfralpha                                       | 1.16E-15 | 4.75572  |
| BC004040  | Cnot8,AA536816,AU015770,AU043059,1500015I04Rik         | 0.00002  | 3.32783  |
| NM_024217 | Cmtm3,BNAS2,Cklfsf3,AI413895,9430096L06Rik             | 4.61E-10 | 3.81441  |
| AK009844  | Cltb,2310046E19Rik                                     | 5.02E-07 | 2.21769  |
| AI448973  | Clstn2,Cs2,CSTN2,Cst-2,AI448973,KIAA4134,mKIAA4134,    | 0.00003  | 8.16741  |
| BG065300  | Clstn1,Cst-1,Cstn1,1810034E21Rik                       | 3.49E-12 | 1.50068  |
| U53455    | Clns1a,Clci,ICLN,Clcni,2610036D06Rik,2610100O04Rik     | 0.00053  | 1.66411  |
| BB236747  | Clic5,B330005L24,5730531E12Rik                         | 0.00051  | 2.3807   |
| BB398988  | Clic4,TU-74,mc3s5,D0Jmb3,mtCLIC                        | 1.35E-20 | 2.76338  |
| NM_033444 | Clic1,G6,Clcp                                          | 1.30E-08 | 2.01974  |
| NM_011334 | Clcn4-2,Clcn4,Clc4-2,MGC117899                         | 0.00033  | 1.51193  |
| NM_028412 | Ciz1,LSFR1,ZNF356,0610038H21Rik,2900056O04Rik          | 1.73E-07 | 2.32725  |
| BQ174991  | Chsy1,KIAA0990,mKIAA0990                               | 0.00042  | 1.87866  |
| NM_018763 | Chst2,Chst2,GST-2,Gn6st,                               | 2.38E-08 | 4.14563  |
| AK003880  | Chst11,C4s,C4ST,C4ST1,C4ST-1,1110020P09Rik             | 0.00058  | 2.73311  |
| AK006398  | Chn2,Bch,ARHGAP3,1700026N20Rik                         | 0.00004  | 2.19553  |
| AV228812  | Ches1,Ches1l,HTLFL1                                    | 0.00003  | 1.97566  |
| BC020488  | Cherp,DAN16,Scaf6,D8Wsu96e,5730408I11Rik               | 0.00017  | 1.86501  |
| BB529459  | Chd6,5430439G14Rik,6330406J24Rik                       | 2.59E-07 | 2.17416  |
| BB409331  | Cgnl1,Jacop,AI503810,4933421H10Rik,9930020M10Rik       | 7.58E-11 | 2.05354  |
| BI248650  | Centd2,mKIAA0782,2410002L19Rik                         | 0.00002  | 3.7026   |
| BB211194  | Centd1,ARAP2,Gm148,mKIAA0580                           | 0.00088  | 2.58876  |
| AV132173  | Cenpa,Cenp-A                                           | 5.00E-11 | 2.33002  |
| BB831146  | Cebpd                                                  | 0.00067  | 1.92749  |
| NM_009876 | Cdkn1c,CDK1,Kip2,p57Kip2,AL024410,p57(kip2)            | 5.05E-06 | 2.60351  |
| AK004852  | Cdk2ap1,Doc1,ST19,Apc10,DORC1,doc-1,Cdkap1             | 8.75E-11 | 1.83824  |
| BG072720  | Cdh11,Cad11,MGC25339,2810038F24,2610005L07Rik          | 5.90E-07 | 2.52964  |
| AV308092  | Cdgap,AU041750,5830477L08Rik                           | 8.53E-06 | 2.01237  |
| AK004547  | Cdc5l,PCDC5RP,AA408004,1200002I02Rik                   | 1.72E-07 | 2.47126  |
| AK008084  | Cdc42se1,SCIP1,Spec1,Cdcse1,AW558204,1300002M12Rik     | 0.00041  | 1.52784  |
| BB012489  | Cdc42ep3,UB1,Cep3,Borg2,AA986861,3200001F04Rik         | 0.00012  | 2.02392  |
| BF453885  | Cdc42ep2,Cep2,Borg1,AI845703,D19Bwg1013e,1110008C05Rik | 0.00006  | 3.1534   |
| BE824561  | Cdc37l1,Harc,Cdc37l,BB159850,2700033A15Rik             | 9.47E-06 | 1.55849  |
| M27130    | Cd44,Ly-24,Pgp-1,HERMES,AW121933,AW146109              | 1.51E-19 | 2.29643  |
| BF123439  | Cd24a,HSA,Ly-52                                        | 5.53E-08 | 1.66534  |
| AF004023  | Cd200,OX2,Mox2                                         | 5.36E-09 | 3.47484  |
| U89772    | Cd151,SFA-1,PETA-3,Tspan24                             | 0.00068  | 1.57086  |
| NM_010490 | Ccrn4l,Ccr4,AU043840,nocturnin                         | 2.10E-14 | 1.84732  |
| NM_017367 | Ccni                                                   | 5.74E-07 | 2.65683  |

|           |                                                            |          |         |
|-----------|------------------------------------------------------------|----------|---------|
| NM_007631 | Ccnd1,Cyl-1,PRAD1,bcl-1,AI327039                           | 0.00057  | 2.97162 |
| AF099052  | Ccl20,CKb4,LARC,ST38,MIP3A,MIP-3A,Scya20,MIP-3[a],exodus-1 | 0.00015  | 3.61306 |
| AW545867  | Cblb,Cbl-b,AI429560,AI851073                               | 3.40E-12 | 2.50744 |
| BB385581  | Cbl,cbl,Cbl-2,c-Cbl,4732447J05Rik                          | 5.09E-08 | 2.29263 |
| NM_022309 | Cbfb,PEA2,Pepp2,PEBP2b,Peppb2,AI893578                     | 7.48E-10 | 1.61708 |
| NM_009814 | Casq2,ESTM52,AA033488,AW146219,MGC115896                   | 0.00002  | 5.88599 |
| NM_009811 | Casp6,Mch2,mCASP-6                                         | 1.45E-31 | 3.52212 |
| BG070529  | Casp3,Lice,Yama,PPP32,Apopain,Caspase-3,A830040C14Rik      | 2.61E-06 | 1.68062 |
| NM_007610 | Casp2,ICH-1,Nedd2,Caspase-2                                | 2.36E-09 | 1.63336 |
| BC008152  | Casp1,ICE,Il1bc,Caspase-1                                  | 0.00022  | 2.59364 |
| AK009873  | Car12,AI314958,2310047E01Rik                               | 1.72E-07 | 1.63864 |
| NM_009794 | Capn2,Capa2,Capa-2,AI326419,m-calpin                       | 1.62E-10 | 1.52442 |
| BB136012  | Capg,mhb1,gCap39                                           | 0.00016  | 3.8496  |
| BG862223  | Camk2b,Camk2d,MGC90738                                     | 1.85E-12 | 5.60058 |
| NM_007594 | Calu,9530075H20Rik                                         | 1.11E-14 | 1.69073 |
| NM_007589 | Calm2,AL024017,1500001E21Rik                               | 0.00002  | 1.51124 |
| BI248947  | Cald1,AI195384,AV071549,                                   | 2.23E-21 | 5.85802 |
| AK010453  | Cad,Cpad,AU018859,2410008J01Rik                            | 0.00018  | 2.83101 |
| NM_007581 | Cacnb3,Beta3,Cchb3                                         | 6.40E-07 | 2.69381 |
| AW494038  | Cacna1g,a1G,[a]1G,Cav3.1d,alpha-1G,mKIAA1123               | 0.00039  | 2.75078 |
| NM_013878 | Cabp2,MGC129493                                            | 6.26E-06 | 3.38625 |
| AF328140  | Cables1,ik3-1,Cables                                       | 8.78E-14 | 5.59853 |
| AK014605  | Cabc1,AI462003,mKIAA0451,4632432J16Rik                     | 0.00038  | 2.8775  |
| AV278756  | C80913,Rmp,NNX3                                            | 1.46E-08 | 1.52516 |
| C79248    | C79248                                                     | 0.00009  | 4.52247 |
| BC006740  | C330016O10Rik,N4bp3,MGC7136                                | 0.00001  | 2.1577  |
| BB098431  | Imp2,IMP-2                                                 | 1.77E-07 | 4.60144 |
| BC023470  | C230093N12Rik,Eeig1,AI426465,MGC38572                      | 0.00083  | 2.54633 |
| AW553275  | C230081A13Rik,AA690169,BE132841,                           | 9.16E-07 | 3.7819  |
| BB183628  | C230027N18Rik,A230108E06                                   | 4.02E-14 | 2.67972 |
| AV227574  | C2                                                         | 0.00006  | 6.0914  |
| AV366874  | C1qtnf7,CTRP7,5530401N20Rik,8430425G24Rik                  | 0.00003  | 7.02476 |
| NM_026125 | C1qdc2,1110035L05Rik                                       | 2.65E-07 | 2.1381  |
| AW209204  | C130021I20                                                 | 0.00035  | 3.04213 |
| BE691546  | C030046G05                                                 | 0.00062  | 4.49331 |
| BB358264  | C030027H14Rik,AI836126                                     | 8.37E-13 | 3.07452 |
| BM932775  | Bzw2,HSPC028,MGC7203,1110001I24Rik                         | 0.00002  | 2.23372 |
| BM240873  | Btla,MGC124217,A630002H24                                  | 1.01E-09 | 4.49091 |
| AV028445  | Btbd3,MGC25591,mKIAA0952                                   | 0.00071  | 2.044   |
| NM_018772 | Bri3,I3,I3 protein                                         | 0.00017  | 1.78379 |
| BE949079  | Brf1,GTF3B,TAF3C,TAFIII90,TFIIIB90,2510002F24Rik           | 0.00041  | 1.79299 |
| BM219644  | Brd8,SMAP,2610007E11Rik,4432404P07Rik,4933408B17Rik        | 0.00005  | 2.01279 |
| BI155271  | Brd2,NAT,Rnf3,Frg-1,Fsrg1,Ring3                            | 0.00007  | 2.74878 |
| NM_028227 | Brap,3010002G07Rik                                         | 0.00014  | 2.47945 |
| BB005556  | Boc,mFLJ00376,4732455C11,DKFZp434L072                      | 0.00001  | 2.27896 |
| BB482899  | Bnc2,MGC124423,MGC124424,5031434M05Rik                     | 3.66E-07 | 7.47322 |
| U88064    | Bnc1,Bnc,AI047752,AW546376                                 | 0        | 3.4983  |
| BC019502  | Bgn,BG,PGI,DSFG1,PG-S1,SLRR1A                              | 9.57E-11 | 2.09615 |
| BM729431  | BF642829,AA623876                                          | 0.00043  | 8.00777 |
| BB667581  | Bcl2I11,Bim,Bod                                            | 0.00037  | 4.01827 |
| BM119782  | Bcl2,Bcl-2,AW986256,C430015F12Rik,D630044D05Rik            | 0.00007  | 2.90925 |

|           |                                                          |          |         |
|-----------|----------------------------------------------------------|----------|---------|
| BB329234  | Bcl11b,Rit1,Ctip2,B630002E05Rik                          | 0.00093  | 3.15894 |
| NM_016707 | Bcl11a,Evi9,Ctip1,mKIAA1809,2810047E18Rik,4930538E20Rik  | 3.00E-09 | 2.46433 |
| AF100339  | Bcl10,CLAP,ME10,cE10,CIPER,BCL-10,C81403,CARMEN,AI132454 | 0.00005  | 1.90266 |
| NM_013867 | Bcar3,AND-34,AI131758                                    | 8.29E-16 | 5.52793 |
| BB151460  | BC065085,A030013D21                                      | 0.00059  | 3.47769 |
| AW493518  | BC064078                                                 | 0.00068  | 3.63988 |
| AV298104  | BC054438                                                 | 1.73E-07 | 2.10626 |
| AV278332  | BC049816,Gm152,MGC59592                                  | 0.00004  | 7.08917 |
| BI409907  | BC039093                                                 | 3.46E-14 | 2.31459 |
| AV146691  | BC038156,E230011F09                                      | 9.58E-06 | 1.57629 |
| BB242234  | BC032203,KIAA0240,mKIAA0240                              | 0.00004  | 1.79063 |
| BC019155  | BC031593,MGC36907                                        | 6.56E-13 | 2.31408 |
| BB698852  | BC030863                                                 | 5.69E-09 | 4.12643 |
| BC027382  | BC027382                                                 | 0.00012  | 3.6238  |
| BB822306  | BC027092,KIAA1052,MGC38792,mKIAA1052,D030051D21          | 0.00079  | 2.09908 |
| BB121616  | BC026657,Skt,6620402G01Rik,9430077C05Rik,E330027G05Rik   | 0.00061  | 2.79371 |
| BC025600  | BC025600,AW208946,MGC38046                               | 4.51E-07 | 3.49544 |
| BC018507  | BC018507,C77245,MGC27742,mKIAA0947                       | 0.00019  | 2.63594 |
| BC027150  | BC014699,MGC25911,MGC37042                               | 1.14E-08 | 7.00099 |
| BB553912  | BC010304,KIAA0183                                        | 3.79E-13 | 1.51811 |
| BC006909  | BC006909,MGC6888                                         | 0.00028  | 1.53067 |
| BE853170  | BC006779,MGC63178,mKIAA1769                              | 0.00078  | 2.97675 |
| NM_030565 | BC004044,C76981,Fam20c,MGC7673,KIAA4081,mKIAA4081        | 0.00018  | 2.72958 |
| BB532946  | BC003993,MGC7531,AA684037,AI173004,AL022752              | 2.91E-11 | 2.36643 |
| BC024449  | Bbx,5730403O13Rik                                        | 0.00009  | 5.66352 |
| NM_130452 | Bbox1,AI874739                                           | 0.00078  | 2.39571 |
| BM239162  | Baz1a,Acf1,Gtl5,cbp146,Wcrf180,BC065123,B930060C03       | 3.45E-05 | 1.65767 |
| AW545877  | Bat3,G3,BAG6,Scythe,AA408914,D17H6S52E,2410045D21Rik     | 0.00056  | 2.03669 |
| BC011067  | Bat1a,Bat1,Bat-1,D6S81Eh                                 | 1.58E-18 | 2.09779 |
| AK011545  | Basp1,CAP23,Ckap3,NAP22,CAP-23,NAP-22,2610024P12Rik      | 1.13E-25 | 3.12553 |
| AK009033  | Bap1,uch-x4,AA989761,AW553466,mKIAA0272,2300006C11Rik    | 0.00013  | 2.97818 |
| BB114336  | Bace1,C76936                                             | 7.13E-14 | 2.37219 |
| BB699417  | B930006L02Rik,mKIAA0280,2610030B18Rik                    | 1.84E-08 | 2.1236  |
| AI099111  | B2m,Ly-m11,beta2-m                                       | 7.97E-24 | 1.96325 |
| BB827631  | B230396K10Rik                                            | 0.00002  | 2.49208 |
| BB497449  | B230373P09Rik                                            | 2.25E-06 | 4.1398  |
| BC024141  | B130052G07Rik,MGC38004                                   | 0.00068  | 2.03153 |
| BG068664  | Aytl2,C87117,MGC8148,BB137372,BC005662,2900035H07Rik     | 7.94E-08 | 5.37856 |
| AA500897  | Axl,Ark,Ufo,Tyro7,AI323647                               | 0.00027  | 2.18212 |
| BB004060  | Axin1,Fu,Kb,Ki,Axin,fused,kinky,knobably,AI316800        | 0.00051  | 4.0936  |
| AV246615  | AW061234                                                 | 1.18E-25 | 2.40932 |
| AV305633  | AW011752,AW557776,KIAA1387,mKIAA1387,RP23-393O10.1       | 0.0001   | 1.6816  |
| BB429147  | Auts2,2700063G02Rik,A730011F23Rik,D830032G16Rik          | 3.92E-08 | 1.7843  |
| AV024806  | AU040377,5930412K08                                      | 0.00002  | 6.01558 |
| BG069874  | AU021025                                                 | 7.97E-08 | 3.0594  |
| BB705334  | Atxn2,ATX2,Sca2,AW544490,9630045M23Rik                   | 0.00007  | 1.59799 |
| BB818797  | Atxn1,Atx1,Sca1,C85907,Ataxin-1                          | 0.00006  | 4.37706 |
| BB825830  | Atrx,XH2,Xnp,ATR2,MRXS3,Rad54,Hp1bp2,RAD54L,ZNF-HX,      | 1.54E-11 | 7.46469 |
| NM_009729 | Atp6v0c,AtpI,PL16,VATL,Vma3,Atp6c,Atp6I,Atp6c2,AtpI-rs1  | 0.00047  | 1.65491 |
| BI080505  | Atp1b3,AA409958,AI664000,AW212096                        | 3.03E-07 | 1.66631 |
| BC025618  | Atp1a1,Atpa-1,BC010319,MGC38419                          | 0.00012  | 2.13346 |



|           |                                                         |          |         |
|-----------|---------------------------------------------------------|----------|---------|
| BM210947  | Atox1,ATX1,AI256639                                     | 4.41E-15 | 3.85407 |
| NM_007881 | Atn1,Atr1,Drpla,atrophin-1                              | 0.0006   | 1.75596 |
| AV168389  | Atg5,App5l,Atg5l,Paddy,                                 | 0.00023  | 2.35691 |
| NM_019426 | Atf7ip,AM,2610204M12Rik                                 | 0.00009  | 2.55214 |
| BM119623  | Atf2,mXBP,Atf-2,Creb2,CRE-BP,D18875,                    | 1.85E-12 | 2.18029 |
| BM207355  | Ash2l                                                   | 1.16E-11 | 2.40478 |
| AK007519  | Ascc1,CGI-18,ASC1p50,AI550520,1810015P09Rik             | 0.00011  | 1.88231 |
| BC019117  | Ars2,Asr2,ASR2A,ASR2B,ASR2C,ASR2D                       | 0.00013  | 1.99285 |
| AW556597  | Arrdc3,AI450344,MGC107410,mKIAA1376                     | 0.00007  | 4.18235 |
| BE979985  | Arpc1b,L72,41kDa,SOP2Hs,p41-ARC                         | 8.05E-11 | 2.45263 |
| NM_026139 | Armcx2,ALEX2,AI043003,3230401N03Rik                     | 0.00006  | 3.57212 |
| BC018479  | Arl8a,gie2,Arl10b,1110033P22Rik                         | 0.00024  | 1.98852 |
| NM_019665 | Arl6,1110018H24Rik,2210411E14Rik                        | 0.00031  | 1.67752 |
| BB811124  | Arl5a,Arl5,T25534,AA408731,AW610751                     | 0.00005  | 1.76266 |
| BQ176306  | Arl4c,LAK,Arl7,A630084M22Rik                            | 0.0001   | 2.60709 |
| AV225959  | Arl13b,Arl2l1,A530097K21Rik,A930014M17Rik,C530009C10Rik | 0.00094  | 1.82599 |
| AV273623  | Arid2,4432409D24Rik                                     | 0.00014  | 2.26343 |
| BG064710  | Arid1a,Osa1,Smarcf1,1110030E03Rik                       | 1.16E-17 | 3.38168 |
| BM246754  | Arhgef6,1600028C08Rik,1700038J06Rik,4930592P22Rik       | 0.00001  | 3.63333 |
| BE865221  | Arhgef2,GEF,Lfc,P40,GEFH1,LFP40,Lbcl1                   | 8.54E-07 | 2.84564 |
| AV345051  | Arhgef10,KIAA0294,mKIAA0294,6430549H08Rik               | 0.00005  | 2.88687 |
| AK002516  | Arhgdib,D4,Gdid4,Ly-GDI                                 | 0.00009  | 2.47645 |
| BG074665  | Arhgap10,PSGAP-m,PSGAP-s,A930033B01Rik                  | 0.00033  | 2.76924 |
| BB326079  | Arfrp2,A430036I03,C230032K13Rik                         | 5.74E-39 | 6.75836 |
| BI653265  | Arf4,AA407803                                           | 5.90E-06 | 1.82882 |
| NM_007472 | Aqp1                                                    | 3.96E-22 | 2.90756 |
| BQ176992  | Apxl,4832440C16,C630003H05Rik                           | 1.41E-11 | 2.58447 |
| NM_007471 | App,Adap,Cvap,Abeta,amyloid,appican,betaAPP,            | 0.00001  | 2.08061 |
| BC003792  | Apobec1,Cdar1                                           | 0.00078  | 5.13041 |
| AW542721  | Apbb2,TR2L,Zfra,Rir1,2310007D03Rik                      | 0.00042  | 2.48963 |
| NM_009681 | Ap3s1,[s]3A,MGC117528                                   | 1.59E-13 | 1.88739 |
| AK007763  | Aof2,AA408884,mKIAA0601,D4Ert478e,1810043O07Rik         | 4.72E-10 | 2.70228 |
| NM_013472 | Anxa6,Anx6,Cabm,Camb,AnxVI,AW107198                     | 0.00012  | 5.64792 |
| D63423    | Anxa5,Anx5,R74653                                       | 5.62E-25 | 2.4299  |
| AF022957  | Anp32a,LANP,pp32,Anp32,PHAP1,I1PP2A,W91701              | 0.0006   | 3.27727 |
| BB038765  | Ankrd25,MGC7734,AI504612,BC010245,MGC12143              | 0.00001  | 2.84904 |
| NM_133971 | Ankrd10,AW549277,4833425P12Rik                          | 0.00041  | 2.94061 |
| BC024870  | Anapc4,APC4,D5Ert4249e,2610306D21Rik                    | 0.00079  | 1.51527 |
| BG067039  | Amot,CAG-2,C81439,D0Kist1,mKIAA1071,E230009N18Rik       | 1.80E-07 | 2.65673 |
| BC010598  | Amigo1,A,ali2,Amigo,MGC25558                            | 4.94E-06 | 3.18209 |
| BB704902  | Amaco                                                   | 1.32E-15 | 8.4465  |
| BB443911  | Als2cr19,PAR3B,PAR3L,                                   | 2.33E-12 | 3.09222 |
| NM_019998 | Alg2,ALPG2,CDGli,MNCb-5081,1110018A23Rik,1300013N08Rik  | 0.00013  | 1.80334 |
| U95030    | Alcam,BEN,SC1,MuSC,CD166,AI853494,DM-GRASP,MGC27910     | 2.12E-27 | 6.85221 |
| BC026151  | Akt2,PKB,PKBbeta,AW554154,MGC14031,2410016A19Rik        | 0.00049  | 2.54018 |
| BB246410  | Akap9,C79026,AKAP450,AW545847,mKIAA0803,5730481H23Rik   | 0.00001  | 3.82729 |
| BB037566  | Akap8,AKAP95,AA673585,AU015639,1200016A02Rik            | 8.85E-08 | 1.71959 |
| BB200448  | AI503316                                                | 0.00001  | 2.21487 |
| BG063189  | AI464131,Gm762,AA408153,AI604836                        | 9.44E-18 | 5.73688 |
| AI450236  | AI450236                                                | 0.00019  | 2.12205 |
| BE865094  | AI448196,Gm195                                          | 0.00001  | 3.52644 |

|           |                                                          |          |         |
|-----------|----------------------------------------------------------|----------|---------|
| AI426778  | AI426778                                                 | 4.57E-15 | 4.77014 |
| BQ174439  | AI425999,AW544599                                        | 0.00066  | 3.06655 |
| BB328287  | AI256396                                                 | 0.00029  | 3.6214  |
| AV244175  | AI158848                                                 | 2.23E-12 | 7.74506 |
| BQ175532  | Ahi1,Ahi-1,D10Bwg0629e,1700015F03Rik                     | 1.53E-08 | 3.96578 |
| BB831090  | Ahcy1,DCAL,Irbt,AA409031,AA414901,Ahcy-rs3,1110034F20Rik | 3.39E-07 | 2.88213 |
| BM208224  | Agrn                                                     | 1.28E-33 | 2.71708 |
| BB006088  | Agl,C77197,AI850929,1110061O17Rik,9430004C13Rik,         | 2.15E-08 | 4.7288  |
| BM239026  | Aff3,Laf4,LAF-4,3222402O04Rik                            | 1.83E-07 | 5.50034 |
| NM_007422 | Adss,Adss2,AI314886                                      | 0.00083  | 1.57886 |
| AK004270  | Adnp,AA589558,mKIAA0784                                  | 1.27E-09 | 1.61554 |
| NM_134079 | Adk,AK,MGC6593,AI255373,AI987814,2310026J05Rik           | 1.32E-09 | 2.12706 |
| BI410363  | Add3,R75380,AI463285                                     | 9.03E-06 | 3.23155 |
| BB746807  | Adcy7,AA407758                                           | 8.44E-09 | 3.34737 |
| BB443585  | Adams4,ADMP-1,ADAM-TS4,ADAMTS-2,mKIAA0688,3830423K05     | 0.00014  | 4.11281 |
| AV226694  | Adams18,ADAMTS21,9630038L21,E130314N14Rik                | 0.00013  | 6.45887 |
| BB004039  | Adams12,AI605170,ADAMTS-12                               | 6.78E-11 | 3.90102 |
| D67076    | Adams1,C3-C5,METH1,ADAMTS,ADAM-TS1                       | 5.46E-38 | 4.32969 |
| C76813    | Adam17,Tace,CD156b                                       | 0.0007   | 2.08575 |
| BG921598  | Adam10,kuz,MADM,kuzbanian,1700031C13Rik                  | 1.43E-10 | 2.262   |
| BG801851  | Actr1b,Arp1b,AA960180,AI851923,MGC36526,2310066K23Rik    | 3.29E-06 | 1.99918 |
| BE853286  | Actn1,3110023F10Rik                                      | 4.39E-20 | 1.75503 |
| NM_019673 | Actl6a,Actl6,Baf53a,C79802,AI851094,2810432C06Rik        | 6.35E-09 | 1.70813 |
| NM_080575 | Acss1,Acas2,Acas2l,AceCS2,AI788978,1110032O15Rik         | 1.18E-07 | 5.33578 |
| NM_134188 | Acot2,Mte1,MTE-I,AA571646                                | 0.00013  | 1.75791 |
| NM_012006 | Acot1,ACH2,Cte1,CTE-1,CTE-I,D12Ucla1                     | 5.94E-09 | 1.79844 |
| BI456232  | Acly,AW538652,A730098H14Rik                              | 0.00031  | 1.92323 |
| AV309591  | Abcf1,Abc50,GCN20,AU041969,D17Wsu166e                    | 2.20E-06 | 4.14799 |
| AK016820  | Aatf,Trb,Che-1,MGC35916,4933415H02Rik,5830465M17Rik      | 1.50E-07 | 2.38277 |
| AI426503  | A930031D07Rik,AI850289,A230072B04                        | 1.51E-06 | 5.52402 |
| BG073439  | A830073O21Rik                                            | 1.29E-14 | 3.34419 |
| BE650208  | A830039H10Rik,Mlr1                                       | 0.00065  | 1.63909 |
| BM119567  | A730054J21Rik                                            | 3.29E-19 | 8.01606 |
| BB323288  | A630018P17Rik,Gm390,MGC93029                             | 0.00035  | 1.50468 |
| X01134    | A430107P09Rik,TRAV9-3                                    | 0.00003  | 1.89471 |
| BM218007  | A430107O13Rik,6720481P07                                 | 0.00073  | 2.21355 |
| BB446952  | A330103N21Rik                                            | 2.16E-29 | 3.28715 |
| AI607603  | A230046K03Rik,AA589518,mKIAA1033                         | 5.75E-06 | 2.07895 |
| C85657    | A130040M12Rik,VL30,CA782090,VL30 retroelement            | 0.00015  | 6.9912  |
| BB150653  | A030007L22                                               | 7.54E-12 | 5.80137 |
| BM233467  | 9530068E07Rik,C85061,MGC28751,RP23-289H16.2              | 6.52E-16 | 2.4532  |
| AK004276  | 9430020K01Rik,Gm328,KIAA1462,mKIAA1462,1110056P05Rik     | 0.00074  | 2.30505 |
| BB527078  | 9330186A19Rik,cg003,13CDNA73,AI462658                    | 0.00028  | 1.51626 |
| AI467525  | 9230110C19Rik                                            | 0.00011  | 2.27388 |
| BB279767  | 9130404D08Rik,C77863,C79014,KIAA0892,mKIAA0892           | 5.15E-08 | 4.55624 |
| BC021408  | 9030416H16Rik,mKIAA0648,E230024D05Rik                    | 0.00074  | 1.59099 |
| BB242458  | 9030203C11Rik                                            | 2.83E-06 | 3.35466 |
| AK018506  | 8430438D04Rik,MGC116613,D330034A10Rik                    | 9.43E-23 | 2.87164 |
| BB522197  | 8430420F16Rik                                            | 0.00004  | 3.80424 |
| BG077646  | 6820429M01                                               | 0.00007  | 1.90135 |
| BB054275  | 6720469N11Rik                                            | 4.02E-14 | 6.52349 |

|           |                                                    |          |          |
|-----------|----------------------------------------------------|----------|----------|
| BC011208  | 6530411B15Rik,AI463522,RP23-480G5.1                | 6.21E-25 | 13.44858 |
| AK018285  | 6430590I03Rik                                      | 0.00062  | 2.48371  |
| BB770958  | 6430527G18Rik                                      | 2.85E-07 | 9.45598  |
| AV339861  | 6430511F03                                         | 0.00049  | 2.75885  |
| AV338754  | 6430500C12Rik                                      | 0.00022  | 3.43059  |
| BM502719  | 6330549D23Rik                                      | 0.00004  | 2.14865  |
| BM242294  | 6330500D04Rik,AI225904,1700108N18Rik,E430013J17Rik | 7.37E-31 | 5.08982  |
| BE949277  | 6230424C14Rik                                      | 0.00061  | 2.52771  |
| BB345680  | 6230400D17Rik                                      | 6.42E-06 | 2.59735  |
| AV380797  | 5930437A14Rik                                      | 0.0006   | 4.14096  |
| AV316216  | 5830434P21Rik,AI173903,mKIAA0515,D430039P21        | 0.00023  | 1.57673  |
| AK017401  | 5830407P18Rik,5430437C10Rik                        | 0.00029  | 3.30763  |
| AK018594  | 5730466H23Rik,AA672646,RP23-353E13.3               | 0.00015  | 2.99206  |
| BG972112  | 5730453I16Rik,AL022757,MGC46982,C330017N18Rik      | 0.00013  | 1.71524  |
| BC027108  | 5730420B22Rik,C77647                               | 2.20E-16 | 3.08329  |
| AK017436  | 5530401J07Rik                                      | 0.00004  | 1.68952  |
| AK017331  | 5430421F17Rik                                      | 1.89E-07 | 5.94897  |
| AK017313  | 5430416B10Rik                                      | 0.00062  | 2.93216  |
| AI120070  | 5430406M13Rik,AI607429                             | 0.00011  | 3.03831  |
| BC019948  | 5430405G24Rik,AU018890,mKIAA0553                   | 0.00099  | 1.95253  |
| AK017223  | 5133401H06Rik                                      | 5.35E-07 | 6.11992  |
| AK017198  | 5033428A16Rik                                      | 5.46E-06 | 1.52521  |
| BE374941  | 4932442E05Rik                                      | 4.98E-08 | 2.50865  |
| AK019795  | 4930569K13Rik,C86578,AU023001                      | 0.00081  | 2.80137  |
| BG070377  | 4930566A11Rik                                      | 0.00002  | 4.13643  |
| AV266695  | 4930519N13Rik,Gm1004,Gm1634,mKIAA0980              | 0.00025  | 3.18585  |
| AK005645  | 4930517K11Rik,RPL39L                               | 2.15E-08 | 2.46963  |
| AK013448  | 4930402H24Rik,C78926,AI413763,2810487F15Rik        | 0.00058  | 3.12147  |
| AK014853  | 4921509J17Rik,6330544N02Rik                        | 0.00091  | 4.88354  |
| BM239430  | 4833416J08Rik                                      | 6.67E-09 | 2.15712  |
| AW910504  | 4833416E15Rik,AI428932                             | 2.87E-10 | 4.64059  |
| BB012037  | 4832420M10                                         | 8.73E-07 | 4.93146  |
| BC021511  | 4732486I23Rik,AI502974                             | 2.95E-09 | 1.98545  |
| BC021511  | 4732486I23Rik,AI502974                             | 0.00048  | 1.85121  |
| BQ174442  | 4732416N19Rik                                      | 1.93E-06 | 2.41996  |
| AK014609  | 4633401B06Rik                                      | 0.00003  | 4.44991  |
| AK018605  | 4631408O11Rik                                      | 6.83E-38 | 3.77131  |
| BM208226  | 3526402J09Rik                                      | 1.42E-09 | 8.55447  |
| NM_133750 | 3110048E14Rik,C230014M12Rik                        | 6.72E-24 | 8.84301  |
| AK014112  | 3110032G18Rik,cfm,cfm2                             | 0.00007  | 4.61763  |
| NM_021430 | 2900002H16Rik,FLJ39378,6330559I19Rik               | 1.27E-06 | 2.23787  |
| BE196832  | 2810474O19Rik,GET,AA536804,AU020969,KIAA1551       | 6.02E-10 | 4.05858  |
| AK013345  | 2810402A17Rik,AI448995,AI841128,2310046F18Rik      | 0.00025  | 3.5063   |
| BB080131  | 2810046L04Rik,9330161F11                           | 0.00069  | 1.86219  |
| NM_026613 | 2810027O19Rik,AI596202,4930522P10Rik               | 0.0003   | 2.03583  |
| BC014764  | 2810022L02Rik,AA987173,AI480531,AI842453,AW413586  | 0.00043  | 2.23457  |
| AK012724  | 2810012G03Rik,Fam53C                               | 3.52E-18 | 2.201    |
| AK012666  | 2810004A10Rik,AI428510,MGC118454                   | 1.95E-18 | 13.64918 |
| AK006009  | 2700069A02Rik,AU014748,1010001P15Rik,1700016A15Rik | 0.00004  | 1.58182  |
| NM_133927 | 2700050P07Rik,AI646725                             | 0.00022  | 2.11312  |
| AV127581  | 2700049H19Rik,AI848570                             | 0.00031  | 2.02579  |

|           |                                                         |          |          |
|-----------|---------------------------------------------------------|----------|----------|
| AV332241  | 2700008N14Rik,AU019384,RP23-319B15.5                    | 0.00028  | 1.9915   |
| BC006738  | 2610028H07Rik                                           | 1.66E-09 | 1.97945  |
| BI409701  | 2610027C15Rik,MGC36197                                  | 1.42E-29 | 7.86329  |
| BE692399  | 2610005L07Rik,2810038F24Rik,6720476A01Rik               | 3.06E-09 | 1.86803  |
| NM_025921 | 2610002M06Rik,AI876413                                  | 0.00026  | 2.97797  |
| BI106967  | 2600011C06Rik,RBM25,RNPC7,AI159652,                     | 0.00004  | 3.2479   |
| BM118442  | 2510002A14Rik,AI930088,mKIAA0826,2010313D22Rik          | 1.11E-26 | 2.42512  |
| BE692070  | 2500003M10Rik,C81330                                    | 3.59E-06 | 2.16883  |
| NM_133691 | 2410104I19Rik,SIAHBP1,2810454F19Rik                     | 1.83E-10 | 1.68748  |
| AV330483  | 2410025L10Rik,Gm1049,AI467568,mKIAA1545                 | 4.88E-06 | 4.07429  |
| C76835    | 2410018L13Rik,2810480C08Rik                             | 0.00005  | 2.38966  |
| AV281062  | 2410004N11Rik,AI451943,AW541186,D17ErtD562e             | 0.00074  | 2.1359   |
| AK010185  | 2310075M15Rik,C85409,mKIAA0230,E330004E07               | 0.00004  | 3.23773  |
| AK010113  | 2310068J16Rik                                           | 0.00039  | 2.25605  |
| BF168366  | 2310067E08Rik,C85344,2210414F18Rik                      | 0.0001   | 2.47594  |
| BC021429  | 2310057D15Rik,C81437,BB183658                           | 0.00039  | 1.76802  |
| AI415636  | 2310051F07Rik,AI225898,AL022874,AW546247                | 0.00014  | 1.69366  |
| BG061080  | 2310050P20Rik                                           | 0.00019  | 4.41102  |
| NM_025865 | 2310030G06Rik,AV017521,2610024D04Rik                    | 0.00009  | 2.20981  |
| AA189197  | 2310026E23Rik                                           | 1.73E-09 | 4.04253  |
| BB476775  | 2310008H09Rik,Tsg118                                    | 0.00025  | 2.53545  |
| AV076385  | 2310002A05Rik                                           | 0.00053  | 18.17824 |
| AV341977  | 2300006M17Rik                                           | 9.62E-09 | 2.94748  |
| AK008985  | 2210419D22Rik                                           | 1.17E-19 | 2.45981  |
| BE981170  | 2010305B15Rik,AW321064                                  | 0.00022  | 1.73071  |
| AK008485  | 2010300C02Rik                                           | 5.97E-06 | 5.55564  |
| BC027288  | 2010111I01Rik,Aopep,2300006M17Rik                       | 2.51E-12 | 2.0816   |
| BI963682  | 2010002N04Rik,cl-41,AI195350,AW561905                   | 0.00016  | 2.92211  |
| BB406585  | 1810073N04Rik                                           | 0.00076  | 3.37042  |
| BE946046  | 1810063B05Rik,AI447995                                  | 6.68E-11 | 5.34271  |
| BF472132  | 1810057P16Rik,E130302J09Rik                             | 0.0007   | 5.00151  |
| AK007409  | 1810009N02Rik                                           | 0.00035  | 2.71694  |
| AK007169  | 1700111E14Rik                                           | 0.00034  | 2.31416  |
| BB486340  | 1700081L11Rik,KIAA1267,MGC90742,mKIAA1267,9430041J06Rik | 0.00014  | 2.16176  |
| AK006115  | 1700019E19Rik,R75064                                    | 0.00026  | 1.92225  |
| BG074686  | 1700012H17Rik,AW049855,5031405P22                       | 0.00005  | 3.0854   |
| BG060698  | 1700006J14Rik                                           | 0.00022  | 3.72405  |
| AK002767  | 1600029D21Rik,PLET1,AA407923,AU043048,0610037B23Rik     | 4.04E-08 | 13.44547 |
| BC019498  | 1500011H22Rik                                           | 0.00005  | 1.96034  |
| AK005192  | 1500010M16Rik,Gc20,3110001N14Rik                        | 0.00001  | 1.57176  |
| BF101721  | 1500005K14Rik,cfm,RP23-9619.3                           | 5.62E-07 | 6.45688  |
| BG297038  | 1300007C21Rik,gag protein,murine leukemia retrovirus    | 0.00008  | 3.99683  |
| BI076834  | 1200016E24Rik                                           | 0.00016  | 21.82098 |
| AK004681  | 1200009O22Rik,AI316813,mKIAA0644                        | 0.00015  | 3.89061  |
| AV309085  | 1190002N15Rik                                           | 9.47E-21 | 2.00965  |
| BF180451  | 1110064A23Rik                                           | 0.00007  | 4.31798  |
| NM_054099 | 1110038F14Rik                                           | 0.00028  | 1.71101  |
| AV028026  | 1110034C04Rik,BC064465,mKIAA2010                        | 0.00002  | 2.26805  |
| BE570477  | 1110014K08Rik,D030012E24Rik                             | 7.94E-08 | 2.65768  |
| BC024574  | 1110012L19Rik                                           | 0.0001   | 1.58947  |
| BB489180  | 1110012D08Rik                                           | 1.58E-22 | 2.76474  |

|          |                                               |          |         |
|----------|-----------------------------------------------|----------|---------|
| BC020080 | 1110007F12Rik                                 | 7.40E-06 | 2.89317 |
| BC025641 | 1110007A13Rik,AU017382,BC025641,MGC36596      | 0.00036  | 1.77665 |
| BC016075 | 0610039K22Rik                                 | 1.24E-33 | 3.42087 |
| AK002491 | 0610010K14Rik,AL033328,AU045833,1110020A23Rik | 6.74E-11 | 3.88801 |
| AK002304 | 0610007N19Rik                                 | 1.71E-07 | 4.2264  |

| <b>901 genes down-regulated in BCC (&gt;1.5 fold and P-value &lt; 0.001)</b> |                                                         |                |                    |
|------------------------------------------------------------------------------|---------------------------------------------------------|----------------|--------------------|
| <b>Accession #</b>                                                           | <b>Sequence Name(s)</b>                                 | <b>P-value</b> | <b>Fold Change</b> |
| BM233793                                                                     | Zmpste24,MADB,FACE1,STE24,Face-1,Ste24p,                | 3.01E-15       | -1.55618           |
| NM_009571                                                                    | Zfy2,Zfy-2                                              | 0.00004        | -3.54389           |
| AK004076                                                                     | Zfp706,C77232,AA793007,AW536850,3110006P09Rik           | 0.00004        | -1.61021           |
| BC004695                                                                     | Zfp64                                                   | 0.00007        | -2.61121           |
| AK014497                                                                     | Zfp185,P1,P1-                                           | 1.16E-08       | -3.35732           |
| BI695361                                                                     | Zcchc6,AA420405,MGC38585,6030448M23Rik                  | 1.91E-11       | -2.1869            |
| BB417508                                                                     | Zbtb8os,Arch,Archm,AI851226,2010001H09Rik,2310028N13Rik | 0.00004        | -1.58968           |
| NM_022985                                                                    | Za20d3,Awp1,3110005P07Rik                               | 6.25E-09       | -1.77692           |
| BC025125                                                                     | Ypel5,CGI-127,2310076K21Rik                             | 7.34E-17       | -2.02594           |
| BB131956                                                                     | Yif1a,54TM,Yif1,Yif1p,5330422J23Rik                     | 0.00049        | -1.99913           |
| NM_009529                                                                    | Xmr,MGC107294,MGC118207                                 | 0.00007        | -2.73748           |
| BI102531                                                                     | Wwp1,AIP5,SDRP1,Tiul1,8030445B08Rik                     | 0.00001        | -1.55859           |
| NM_009523                                                                    | Wnt4,Wnt-4,MGC123964                                    | 1.08E-10       | -2.65891           |
| NM_009518                                                                    | Wnt10a                                                  | 0.00071        | -2.01992           |
| AK010881                                                                     | Wipi2,1110018O08Rik,2510001I10Rik                       | 0.00024        | -2.45512           |
| NM_138684                                                                    | Wfdc12,WAP2,Swam2,MGC32134                              | 0              | -42.89845          |
| NM_023191                                                                    | Wdr61,REC14,2700038L12Rik,2810418I05Rik                 | 2.52E-12       | -1.65888           |
| BC017608                                                                     | Wdr54,D3Mm3e,MGC102039,1700030E05Rik                    | 2.05E-06       | -3.77668           |
| NM_021312                                                                    | Wdr12,Ytm1,Ytm1p,4933402C23Rik                          | 4.11E-15       | -1.61423           |
| NM_016800                                                                    | Vti1b,GES30,SNARE,MVti1b,AU015348,Vti1-rp1              | 1.04E-09       | -1.50544           |
| BC027242                                                                     | Vav3,AA986410,MGC27838,A530094I06Rik                    | 3.82E-07       | -1.81576           |
| BB531498                                                                     | Vamp3,ceb,D130027G05Rik                                 | 3.34E-17       | -1.55607           |
| BG070176                                                                     | Usp45,Gcap7,AI843191,3110003C05Rik,4930550B20Rik        | 0.00033        | -2.32195           |
| AI553394                                                                     | Usp2,Ubp41,Usp2-45,Usp2-69,B930035K21Rik                | 8.89E-11       | -4.91415           |
| AK013437                                                                     | Usp16,UBP-M,1200004E02Rik,2810483I07Rik,6330514E22Rik   | 1.86E-14       | -1.93548           |
| BC024355                                                                     | Usmg5,2010301L15Rik                                     | 2.00E-05       | -1.60324           |
| BB355934                                                                     | Unc84b,SUN2,AI551766,C030011B15,B230369L08Rik           | 7.04E-09       | -1.52287           |
| NM_011674                                                                    | Ugt8a,Cgt,Ugt8,mCerGT,AI850488,AW455908                 | 1.10E-31       | -10.59032          |
| BC019434                                                                     | Ugt1a9,A12,Ugt1a12,mUGTBr/P                             | 2.39E-20       | -2.43872           |
| AV313813                                                                     | Uchl5,Uch37,5830413B11Rik                               | 0.00002        | -1.50347           |
| AB033370                                                                     | Uchl3                                                   | 2.06E-13       | -1.65686           |
| BB703414                                                                     | Ubie,Gm921,Ubie2                                        | 0.00014        | -3.80114           |
| AK018443                                                                     | Ube3a,Hpve6a,KIAA4216,                                  | 2.13E-10       | -1.6094            |
| BF466063                                                                     | Tysnd1,1300019N10Rik                                    | 0.00007        | -2.25328           |
| BB006219                                                                     | Tyrp1,b,isa,Tyrp,TRP-1,brown                            | 0.00026        | -3.64328           |
| NM_011661                                                                    | Tyr,c,skc35,albino,Tyr<c-em>                            | 3.40E-06       | -2.77052           |
| NM_015762                                                                    | Txnrd1,TR,TR1,Tgr,TrxR1                                 | 3.46E-07       | -1.73221           |
| AK004219                                                                     | Txn15,TRP14,D11Ert672e,4831443O22Rik,RP23-207N15.4      | 1.21E-14       | -1.7638            |
| NM_011660                                                                    | Txn1,ADF,Txn,AW550880                                   | 3.87E-09       | -1.50438           |
| NM_019742                                                                    | Tusc2,PAP,Fus1,Lgcc,Pdap2,AA407686,1190001E22Rik        | 0.00005        | -2.09918           |
| NM_011656                                                                    | Tuft1                                                   | 0.00021        | -1.84068           |
| AV167776                                                                     | Tubb2c,MGC6713,MGC28623,MGC101937,4930542G03Rik         | 0.00041        | -1.71078           |
| BC003475                                                                     | Tubb2a,Tubb2,M(beta)2                                   | 1.90E-18       | -2.56132           |

|           |                                                         |          |           |
|-----------|---------------------------------------------------------|----------|-----------|
| NM_017379 | Tuba8                                                   | 8.05E-09 | -5.44542  |
| AW491660  | Tuba4,M[a]4                                             | 4.11E-16 | -1.84706  |
| AU019171  | Ttpa                                                    | 3.30E-26 | -5.22882  |
| AF052492  | Tspan7,A15,Mxs1,PE31,Cd231,                             | 0.00001  | -1.91689  |
| NM_019656 | Tspan6,T245,Tm4sf,Tm4sf6,TSPAN-6,AI316786               | 3.21E-07 | -1.57881  |
| BB329435  | Tscot,Ly110,TSO-1C12,5430429N04Rik                      | 1.32E-09 | -3.96618  |
| AU016382  | Tsc22d1,TSC,Egr5,TSC-22,Tgfb1i4,AA589566,AW105905       | 0.00085  | -1.52303  |
| NM_019510 | Trpc3,Trp3,Trpp3,MGC124333                              | 1.10E-29 | -1.23012  |
| AV350958  | Trip4,ASC-1,BB191711,4930558E03Rik                      | 0.00012  | -2.2885   |
| BB466780  | Trim2,narf,KIAA0517,mKIAA0517                           | 5.26E-06 | -1.69276  |
| NM_009413 | Tpd521l,D53                                             | 3.23E-11 | -3.22433  |
| BB765813  | Tom1                                                    | 3.89E-25 | -2.39329  |
| BQ266486  | Tob1,Tob,Trob                                           | 0        | -2.26436  |
| AF167554  | Tnfrsf19,TAJ,Troy,TRADE,                                | 0.00003  | -5.34808  |
| NM_028075 | Tnfrsf13c,Bcmd,Baffr,Bcmd1                              | 0.00001  | -4.48751  |
| NM_021883 | Tmod1,Tmod,E-Tmod,MGC124125,MGC124126                   | 0.00052  | -2.24847  |
| AK007864  | Tmem86a,AI414959,AW742698,1810054O13Rik                 | 0.00009  | -2.4005   |
| BB667368  | Tmem62,C77355,B830009D23Rik                             | 9.72E-08 | -2.7923   |
| BB667728  | Tmem56,AU018104,AW109744,4930577M16Rik,C730036B01Rik    | 4.84E-40 | -5.5701   |
| BC019563  | Tmem54,AI507302,1810017F10Rik                           | 7.11E-19 | -2.5208   |
| BC026654  | Tmem45b,BC018222,MGC25912,MGC37581                      | 0.00012  | -2.90898  |
| NM_019631 | Tmem45a,p19.5,M32486,C630002M10Rik                      | 0.00001  | -2.05922  |
| BC019416  | Tmem40,W64236,AV091463,9030407H20Rik                    | 0.00005  | -1.92963  |
| AK004920  | Tmem24,1300006O23Rik                                    | 0.00041  | -1.91044  |
| AV246773  | Tmeff2,4832418D20Rik                                    | 0.00002  | -1.88258  |
| BC020076  | Tmed5,3110020O18Rik,4432412D15Rik                       | 0.00007  | -1.59161  |
| NM_013769 | Tjp3,ZO-3                                               | 0.00004  | -3.3866   |
| W82151    | Timm8a,Ddp1,Tim8a,Fci-12,DXHXS1274E                     | 1.58E-10 | -1.74779  |
| NM_025790 | Them2,RP23-92G13.5,0610006O17Rik                        | 3.12E-07 | -1.5269   |
| BC025001  | Thedc1,AI607300,E230009B14Rik                           | 7.32E-11 | -13.04226 |
| NM_011581 | Thbs2,TSP2,Thbs-2                                       | 9.05E-21 | -5.20262  |
| NM_009374 | Tgm3,AI893889                                           | 5.70E-08 | -4.44784  |
| BC026422  | Tgm1,Tgase1,2310004J08Rik                               | 0.00023  | -2.03535  |
| AK013971  | Tex261,TEG-261,AA409339,AI480706,AL033351,3110001O07Rik | 0.00066  | -1.58764  |
| BM239615  | Tex2,Taz4,Def-5,AI553404,4930568E07Rik                  | 0.00016  | -1.83487  |
| NM_021344 | Tesc,TE-1,MGC117906,1010001A17Rik,2410011K10Rik         | 0.00096  | -6.84654  |
| NM_021480 | Tdh                                                     | 0.00032  | -3.019    |
| C85065    | Tcta,Tctal,C85065,AW553637,9130410M22Rik                | 0.00002  | -1.69729  |
| NM_013772 | Tcl1b3                                                  | 0.00052  | -1.80703  |
| BB550860  | Tcfap2c,Ap-2.2,AA409384                                 | 2.65E-23 | -2.27719  |
| AI019214  | Tceb1,AA407206,AI987979,                                | 2.60E-09 | -1.59144  |
| NM_009325 | Tbxa2r,TP,MGC107665                                     | 0.00009  | -3.44135  |
| BC002196  | Tbc1d20,AI414693,1110028I04Rik,2810442O16Rik            | 0.00086  | -1.50269  |
| NM_019754 | Tagln3,Np25,AI426007,2700038H05Rik,2900005O10Rik        | 0.00028  | -4.74882  |
| BC019453  | Taf9,Taf2g,AA673500,AU045423,                           | 7.09E-07 | -2.6432   |
| NM_025444 | Taf13,TAFL18,AI847295,1810004N01Rik,2010309N11Rik       | 1.56E-10 | -2.43531  |
| BC004829  | Syngn2,Clast2,cellugyrin                                | 4.05E-20 | -1.67703  |
| NM_011504 | Stxbp3a,Stxbp3,Sxtbp3,MGC86097,Munc-18c                 | 3.46E-04 | -1.64824  |
| AV173139  | Stk17b,Drak2,AI120141,3110009A03Rik                     | 5.98E-18 | -1.81866  |
| NM_025288 | Stfa3,Stf3,Stfa1,MGC118399,MGC130145,MGC130146          | 6.88E-13 | -2.46216  |
| AF297098  | Steap1,Steap,Prss24,2410007B19Rik                       | 4.60E-09 | -6.00463  |

|           |                                                          |          |           |
|-----------|----------------------------------------------------------|----------|-----------|
| BI076697  | Stard5,AI607880,D7ErtD152e,2310058G22Rik                 | 3.66E-07 | -1.63217  |
| NM_138744 | Ssx2ip,Adip,AU014939,AU042321                            | 0.00002  | -1.61854  |
| BM210600  | Srxn1,Srx,Npn3,TX01,AI854065,AW488194,1700127B04Rik      | 0.00009  | -1.78864  |
| NM_011481 | Srms,srm,A230069J08Rik                                   | 0.00086  | -2.81603  |
| BB817145  | Srgap2,FBP2,Fnbp2,srGAP3,AI448945,9930124L22Rik          | 0.00009  | -1.60533  |
| AF174535  | Sqrdl,0610039J17Rik,4930557M22Rik                        | 8.40E-06 | -1.74658  |
| NM_026335 | Sprrl9,AI426284,2310066F03Rik                            | 9.80E-12 | -6.02693  |
| NM_027137 | Sprrl7,AI415320,2310037L11Rik                            | 2.12E-35 | -16.16622 |
| NM_026822 | Sprrl5,1110029C13Rik                                     | 0        | -9.55132  |
| NM_025984 | Sprrl3,2200008B06Rik                                     | 9.11E-44 | -5.43692  |
| NM_028625 | Sprrl2,1110004E04Rik                                     | 0        | -8.67369  |
| AV371678  | Sprr2a,MGC117544                                         | 1.03E-06 | -7.2887   |
| BB815380  | Spop,TEF2,Pcif1,AI315626                                 | 1.20E-22 | -1.53058  |
| BM234794  | Spire1,Spir-1,AI415299,AU022898,AW550622,6030430B19Rik   | 0.0002   | -1.7111   |
| NM_016907 | Spint1,HAI-1                                             | 2.19E-09 | -1.82859  |
| AF068749  | Sphk1,SK1,1110006G24Rik                                  | 0.00025  | -2.11906  |
| BC011220  | Spfh1,Keo4,2810439N09Rik                                 | 6.86E-31 | -2.02409  |
| NM_012031 | Spag1,tpis                                               | 0.00069  | -2.82376  |
| BB257593  | Sox6,AI987981                                            | 0.00082  | -2.55675  |
| AY069926  | Sox21,Sox25                                              | 2.83E-06 | -4.42278  |
| AV247637  | Sort1,Ntr3,Ntsr3,AI852375,2900053A11Rik                  | 0.00091  | -1.89829  |
| BB737680  | Sorbs1,CAP,Sh3d5,SH3P12,mKIAA1296,                       | 0.00078  | -2.22427  |
| BB022975  | Solh                                                     | 6.99E-09 | -2.22926  |
| NM_013671 | Sod2,MnSOD,Sod-2,MGC6144                                 | 2.50E-14 | -2.23343  |
| BG064396  | Soat1,ald,Acact,ACAT-1,8430426K15Rik                     | 9.75E-09 | -3.24959  |
| NM_016667 | Sntb1                                                    | 0.00048  | -4.16426  |
| BC020189  | Snrk,R74830,AI448042,                                    | 2.39E-04 | -2.13262  |
| NM_013669 | Snap91,91kDa,AP180,F1-20,mKIAA0656                       | 5.10E-18 | -6.1149   |
| BF682880  | Snap29,Gs32,AI891940,AU020222,BB131856,1300018G05Rik     | 1.56E-07 | -2.07481  |
| NM_011421 | Smpd1,ASM,aSMase,A-SMase                                 | 4.10E-06 | -1.85307  |
| NM_020519 | Slurp1,ARS,ArsB,Slurp-1,AI415082,1110021N19Rik           | 6.70E-08 | -5.36167  |
| BB805362  | Slc9a3r1,EBP-50,NHE-RF,NHERF-1,MGC95776                  | 0        | -1.88799  |
| BG069516  | Slc6a8,CRT,CT1,CRTR,Creat,AA589632                       | 2.08E-07 | -1.54896  |
| BC017691  | Slc5a8,Ait,MGC19357                                      | 0.00008  | -2.06838  |
| BC024519  | Slc45a3,PRST,k                                           | 0.00021  | -4.52966  |
| AF226613  | Slc40a1,MTP,OI5,Pcm,Dusg,Fpn1,MTP1,IREG1,Slc11a3,Slc39a1 | 1.77E-09 | -2.04732  |
| BC019647  | Slc39a11,1810074D23Rik                                   | 3.52E-08 | -1.64847  |
| BC022752  | Slc37a2,ci2,G3PP,ci-2,Slc37a1                            | 6.21E-12 | -2.61818  |
| BB106270  | Slc35e4,AI414849,AI536442,MGC28785,                      | 0.00048  | -1.60329  |
| NM_011402 | Slc34a2,Npt2b,NaPi-2b,AA536683,D5ErtD227e                | 2.91E-10 | -2.87028  |
| NM_025286 | Slc31a2,AI604396,MGC117640                               | 0.00001  | -1.89413  |
| BB771765  | Slc31a1,Ctr1,AI787263,AU016967,4930445G01Rik             | 2.17E-06 | -1.86929  |
| X69698    | Slc2a3,Glut3,C78366,Glut-3,AA408729,AL023014             | 5.74E-06 | -3.60881  |
| NM_022317 | Slc28a3,Cnt3                                             | 0.00021  | -2.80167  |
| BC023114  | Slc27a4,FATP4,BB144259                                   | 0        | -3.49229  |
| BB186319  | Slc25a25,MCSC,MGC36388,mKIAA1896,1110030N17Rik           | 0.00062  | -1.86103  |
| AV008091  | Slc25a20,Cact,mCAC,C78826,1110007P09Rik                  | 1.86E-12 | -1.65536  |
| AW541300  | Slc25a15,Ornt1,D630044L02Rik                             | 2.98E-06 | -1.52446  |
| AK019150  | Slc25a12,AI839531,2610002D09Rik                          | 2.74E-08 | -1.61569  |
| BC003222  | Slc25a10,Dic                                             | 0.00002  | -4.90427  |
| BC017615  | Slc24a3,NCKX3                                            | 0.00006  | -4.8057   |

|           |                                                           |          |           |
|-----------|-----------------------------------------------------------|----------|-----------|
| BC010590  | Slc22a4,Octn1                                             | 0.00015  | -4.55001  |
| AI303435  | Slc1a4,SATT,ASCT1,AW045657                                | 0.00034  | -2.63504  |
| BB357585  | Slc1a3,Gmt1,Eaat1,GLAST,GLU-T                             | 0.00017  | -4.5078   |
| NM_053079 | Slc15a1,PECT1,PEPT1,D630032F02                            | 9.63E-07 | -2.34016  |
| NM_134251 | Slc12a8,CCC9,E330020C02Rik                                | 0.00016  | -1.60004  |
| BB496854  | Shprh,AA450458,AU024614,BC006883,                         | 0.00044  | -2.19736  |
| NM_013709 | Sh3yl1,Ray,YSC84,AI314953                                 | 0.00064  | -1.63432  |
| BB326929  | Sh3kbp1,Ruk,Seta,AI447724,                                | 3.03E-06 | -1.52763  |
| NM_024480 | Sh3bp5l,MGC7813,BC003251                                  | 0.00015  | -1.93215  |
| BQ176371  | Sgpp1,SPP,SPP1,Spph1,mSPP1,AI463453                       | 9.89E-06 | -1.82031  |
| NM_009163 | Sgpl1,Spl,AI428538,D10Xrf456                              | 3.05E-19 | -1.84719  |
| BB478992  | Sfxn1,f,2810002O05Rik,A930015P12Rik                       | 0.00006  | -1.50564  |
| BC017549  | Sft2d2,cl-45,AI506168,AW561909,2010005O13Rik              | 0.00002  | -1.86939  |
| BB221995  | Sfrp4                                                     | 1.02E-07 | -2.99464  |
| NM_009144 | Sfrp2,Sdf5,AI851596                                       | 2.12E-06 | -3.69357  |
| AF366401  | Sertad1,Sei1,AV000455,AW456625,TRIP-Br1,1110032C13Rik     | 6.20E-06 | -1.62047  |
| NM_011340 | Serpinf1,Pedf,Sdf3,EPC-1,Pedfl,AI195227                   | 0.00007  | -1.64709  |
| NM_009255 | Serpine2,PI7,PN-1,Spi4,B230326M24Rik                      | 0.00002  | -1.95554  |
| NM_011459 | Serpinb8,CAP2,NK10,Spi8,CAP-2,ovalbumin                   | 9.20E-06 | -2.43055  |
| NM_027548 | Serpinb7,megsin,ovalbumin,4631416M05Rik                   | 2.12E-20 | -6.63513  |
| AI462524  | Serpinb5,Spi7,Maspin,AI462524,AI646751,ovalbumin,         | 1.42E-06 | -1.65808  |
| NM_009126 | Serpinb3a,Sqn5,Scca2,Serpinb4,1110001H02Rik,1110013A16Rik | 0.00044  | -2.20235  |
| NM_025867 | Serpinb11,AU015399,2310046M08Rik                          | 1.85E-06 | -2.32129  |
| NM_008458 | Serpina3c,1A1,Kalbp,Klkbp                                 | 0.00028  | -3.68948  |
| NM_028740 | Serpina3a,4933406L18Rik                                   | 9.60E-14 | -67.79047 |
| AK014346  | Serpina12,4632419J12Rik                                   | 8.90E-10 | -7.75306  |
| AK002313  | Serhl,AU019786,0610008B10Rik,1110019M09Rik                | 0.00082  | -1.73607  |
| BC006030  | Serbp1,Pairbp1,AL022786,1200009K13Rik,9330147J08Rik       | 0.00037  | -1.53065  |
| AF033350  | Sept5,Pnutl1,Cdcrel1,Cdcrel-1                             | 0.00002  | -1.74318  |
| AV256403  | Sema4d,CD100,Semaj,Semcl2,coll-4,Semacl2                  | 0.00019  | -3.34661  |
| BB499147  | Sema3d,4631426B19Rik                                      | 2.75E-08 | -4.58129  |
| NM_019414 | Selenbp2,AP56,Lpsb2                                       | 1.21E-18 | -15.40525 |
| NM_009150 | Selenbp1,Lp56,Lpsb,MGC18519                               | 1.98E-19 | -28.69029 |
| BC026948  | Sec14I4,SPF,TAP,AI256582,AW536553,MGC30313                | 1.24E-09 | -5.01654  |
| AK007641  | Sec11I3,1810029G24Rik                                     | 2.35E-21 | -2.66853  |
| NM_019934 | Sec1,Fut3,Fut10                                           | 0.00082  | -2.39957  |
| C76618    | Scp2,SCPx,SCP-2,C76618,C79031,                            | 3.23E-12 | -1.54086  |
| AF112185  | Scnn1a,Scnn1,mENaC                                        | 0.00037  | -2.76714  |
| X67702    | Scgb1a1,UG,UGB,Utg,CC10,CC16,CCSP,PCB-BP                  | 6.14E-18 | -26.21115 |
| BE133651  | Scd3,4930513N16Rik                                        | 0.00035  | -4.96536  |
| NM_009127 | Scd1,ab,SCD,Scd-1,AA589638,AI265570                       | 6.82E-33 | -3.53816  |
| AB016248  | Sc5d,A830037K02,A830073K23Rik                             | 0.00007  | -1.57693  |
| AK005441  | Sc4mol,DESP4,ERG25,C78600,1500001G16Rik                   | 1.13E-19 | -1.88808  |
| NM_011314 | Saa2,Saa1,Saa-2,AW111173,amyloid A                        | 1.14E-15 | -5.41881  |
| NM_009117 | Saa1,Saa2,Saa-1                                           | 1.32E-06 | -8.8316   |
| NM_020568 | S3-12,mKIAA1881                                           | 9.12E-09 | -3.90208  |
| AF087470  | S100a3,S100E                                              | 0.00093  | -5.27281  |
| BC020031  | S100a16,S100F,DT1P1A7,AI325039,AI663996,2300002L21Rik     | 0.00006  | -1.59511  |
| NM_025393 | S100a14,S100a15,1110013O05Rik                             | 5.22E-06 | -1.73196  |
| NM_009113 | S100a13                                                   | 0.00026  | -1.52981  |
| BM217861  | Rsnl2,1700024K14Rik,1700074B05Rik,                        | 1.86E-35 | -2.18931  |



|           |                                                      |          |           |
|-----------|------------------------------------------------------|----------|-----------|
| BE376079  | Rps6ka3,Rsk2,MPK-9,pp90RSK2,S6K-alpha3               | 0.00035  | -2.07378  |
| AV110626  | Rpl37,3110005M08Rik                                  | 0.00004  | -1.54462  |
| BC003896  | Rpl17,MGC103289,MGC118163                            | 4.02E-08 | -3.1542   |
| BB278046  | Rp1hl1,Rp1l1,BC031365,MGC38744                       | 0.0007   | -2.7931   |
| Bl660199  | Rora,sg,ROR1,ROR2,ROR3,Nr1f1,staggerer,9530021D13Rik | 0.00001  | -3.05071  |
| T12280    | Rnf149,C76763,Greul4,AV037261,1600023E10Rik          | 2.61E-37 | -2.11803  |
| AK004847  | Rnf128,GRAIL,Greul1,AI987883,1300002C13Rik           | 1.13E-10 | -1.08254  |
| BB765679  | Rnf123,Kpc1,BC003945                                 | 1.21E-12 | -1.93765  |
| AV101824  | Rnaset2,C79750,RNASE6PL                              | 0.00002  | -2.08144  |
| NM_011271 | Rnase1,Rib1,Rib-1,AI574248                           | 0.00089  | -2.14996  |
| NM_024182 | Riok3,Sudd,D18Erd331e,1200013N13Rik,E130306C24Rik    | 0.00001  | -1.58883  |
| AF378088  | Rhou,Arhu,G28K,WRCH1,                                | 4.17E-15 | -2.16094  |
| BG063931  | Rhog,Arhg,Sid10750                                   | 1.50E-08 | -2.01229  |
| NM_011268 | Rgs9                                                 | 0.0001   | -1.8664   |
| NM_020509 | Retnla,HIMF,Xcp2,Fizz1,RELMa,                        | 2.07E-12 | -7.97501  |
| NM_022984 | Retn,ADSF,Rstn,Xcp4,Fizz3                            | 8.93E-07 | -6.72896  |
| NM_026395 | Rer1,AU043380,1110060F11Rik,5830454N22Rik            | 0.00038  | -1.62611  |
| NM_011261 | Reln,rl,reeler                                       | 0.00002  | -2.15744  |
| BE979765  | Rdh9,Crad3,AI121090                                  | 2.57E-37 | -3.17326  |
| BC016204  | Rdh12,A930033N07Rik                                  | 5.51E-07 | -2.69439  |
| NM_080436 | Rdh1                                                 | 1.38E-18 | -3.2445   |
| NM_023462 | Rbp7,CRBP-III,1110002J23Rik                          | 1.06E-08 | -11.02143 |
| BF124648  | Rbm35b,9530027K23Rik                                 | 0.00001  | -1.69949  |
| AA138720  | Rbl2,Rb2,p130                                        | 0.00005  | -1.83619  |
| BC025874  | Rbbp6,C77662,AI316869,MGC32263                       | 2.67E-16 | -2.20233  |
| NM_025886 | Rassf7,AW210608,2400009B11Rik                        | 7.17E-06 | -2.20444  |
| BB703307  | Rassf3,AW212023,AW322379                             | 1.67E-26 | -3.13384  |
| BC026377  | Rasd2,Rhes,TEM2,TEM-2,AU045414,4930526B11Rik         | 0.00056  | -2.78863  |
| NM_025936 | Rars,AL033339,AW985894,2610011N19Rik,2610037E21Rik   | 6.02E-09 | -1.79325  |
| BC024698  | Ranbp10,4432417N03Rik                                | 3.49E-07 | -1.60525  |
| AV263855  | Ralgps1,RALGEF2,AI853783,AI854138,RALGPS1A,          | 0.00066  | -3.14863  |
| BF319015  | Rab3ip,Rabin3,Gtpat12,MGC90794,B230311A06            | 4.30E-08 | -2.04978  |
| BG070713  | Rab30,Rsb30,AI323892,5033421K01Rik                   | 0.0001   | -3.84951  |
| BB121269  | Rab27b,2310021G14Rik                                 | 1.83E-15 | -4.23098  |
| NM_016899 | Rab25,AV012978                                       | 5.81E-08 | -2.10579  |
| BC010722  | Rab11a                                               | 1.86E-25 | -1.62054  |
| NM_021881 | Qk,Qkl,I17Wis1,1500005P18,I(17)-1Wis                 | 0.00015  | -2.11673  |
| NM_021534 | Pxmp4,Pmp24,3010018P03Rik                            | 7.57E-07 | -2.84701  |
| NM_021495 | Pvrl3,AA407785,AU016832,AW538082                     | 0.00011  | -2.0398   |
| BM220305  | Purb,Cager-2,AA114818,D11Bwg0414e,2310015K15Rik      | 6.78E-08 | -1.76379  |
| BC002298  | Ptprz1,Ptpz,Ptprz,PTPbeta,PTPzeta,AI850339,          | 0.00004  | -1.51427  |
| NM_023587 | Ptplb,AI255777,AI481689,6330408J20Rik                | 0        | -3.54943  |
| AV331223  | Ptp4a1,Pri-1,AA415290,AU019864,MGC25304              | 0.0008   | -1.51855  |
| BC011193  | Ptger4,EP4,Ptgerep4                                  | 3.64E-08 | -2.44523  |
| NM_008959 | Ptdss1,PSS-1,AU044268,AW539008,mKIAA0024             | 4.78E-09 | -1.52367  |
| AB029145  | Psm4,Af1,Mcb1                                        | 8.69E-06 | -3.23678  |
| AV249558  | Psen2,PS2,Ad4h,PS-2,ALG-3,AI266870                   | 0.00065  | -2.54354  |
| AV216491  | Psat1,PSA,EPIP,Psat,AL024078,AL024083,AU040266       | 5.45E-15 | -2.38216  |
| NM_011171 | Procr,Ccca,EPCR,AI325044                             | 1.66E-15 | -4.03368  |
| X59274    | Prkcb1,Pkcb,Prkcb,PKC-Beta,Pkcbetall,A130082F03Rik   | 0.00083  | -1.73579  |
| BB612385  | Prkaa2,A830082D05,2310008I11Rik                      | 0.00043  | -2.13707  |

|             |                                                     |          |          |
|-------------|-----------------------------------------------------|----------|----------|
| BC008174    | Prdx5,AOPP,PrxV,Pmp20,Prdx6,AOEB166                 | 2.09E-25 | -1.95281 |
| BC019216    | Pqlc2,BC019216,MGC29170,MGC38094                    | 9.95E-08 | -4.30147 |
| AF326558    | Ppt1,PPT,CLN1,INCL                                  | 0.00024  | -1.51038 |
| AK010754    | Ppp2r1b,AI790395,2410091N08Rik                      | 0        | -2.08178 |
| NM_025800   | Ppp1r2,IPP-2,D16ErtD248e,                           | 0.00003  | -1.87926 |
| BB035578    | Ppm1l,PP2C,Pp2ce,Ppp2ce,                            | 1.03E-15 | -1.58868 |
| AF259672    | Ppm1a,MMPa-2,MPPa-1                                 | 5.54E-08 | -2.41151 |
| AF126834    | Ppl,AW553870                                        | 8.58E-09 | -1.96992 |
| AV209130    | Ppifs,4930520F12Rik                                 | 0.00001  | -1.67113 |
| NM_134084   | Ppif,PPlase,AW457192                                | 7.61E-19 | -2.36051 |
| BB745167    | Ppargc1a,Pgc1,PGC-1,Pgco1,PGC-1v,                   | 1.24E-38 | -2.30546 |
| NM_011146   | Pparg,Nr1c3,PPAR-gamma,PPAR-gamma2                  | 7.49E-06 | -7.07711 |
| NM_008903   | Ppap2a,LPP1,mPAP,Hic53,LPP-1,Hpic53                 | 8.43E-06 | -2.19707 |
| NM_026438   | Ppa1,Pyp,2010317E03Rik                              | 4.31E-25 | -2.43711 |
| AI528824    | Pp11r,Tcl-30                                        | 2.27E-06 | -1.58892 |
| BG073302    | Pop1,MGC36536,4932434G09Rik                         | 0.00061  | -2.95897 |
| NM_026190   | Polr3g,RPC7,RPC32,AV275904,2310047G20Rik            | 4.87E-07 | -2.23653 |
| AV102258    | Polr2l,2510029B14Rik                                | 1.06E-09 | -1.55713 |
| AV161379    | Polr2f,1810060D16Rik                                | 0.00003  | -3.34602 |
| NM_020032   | Poll,AV007317,1110003P06Rik                         | 0.0006   | -2.73319 |
| AF408412    | Pof1b,2310066B14Rik                                 | 6.42E-28 | -2.16528 |
| AV380429    | Pnmt,Pent                                           | 0.00071  | -2.59994 |
| BI713896    | Pmvk,PMK,PMKA,PMKASE,AV001327                       | 1.63E-07 | -2.73626 |
| NM_008885   | Pmp22,Tr,HNPP,22kDa,Gas-3,trembler                  | 0.00004  | -1.69076 |
| BB559706    | Plxdc2,Tem7r,AU022916,AV231634,1200007L24Rik        | 3.50E-13 | -1.98376 |
| BC016255    | Pla2g4b,Gm1013,MGC28892,A030011C02Rik               | 1.05E-06 | -2.95806 |
| NM_013631   | Pklr,Pk1,Pk-1                                       | 0.00001  | -7.38827 |
| AV304625    | Pitrm1,MP1,Ntup1,AA410010,mKIAA1104,2310012C15Rik   | 2.18E-20 | -2.46126 |
| BB504983    | Pisd,9030221M09Rik                                  | 0.0006   | -2.01127 |
| BF318238    | Pigp,Dcrc,Dscr5                                     | 0.0003   | -1.64461 |
| BC023128    | Pias3,Pias3L,MGC27936                               | 0.00029  | -1.5601  |
| AK004672    | Pi16,Cripi,1200009H11Rik                            | 6.68E-18 | -8.42812 |
| BF322962    | Pgrmc2,DG6,PMBP,4631434O19Rik                       | 1.02E-12 | -1.92088 |
| BB095413    | Pgd,C78335,AU019875,0610042A05Rik                   | 5.88E-09 | -1.60814 |
| AA396586    | Pdzk1ip1,Map17,AU046042,0610007F13Rik,2700030M23Rik | 0.00024  | -2.15773 |
| AK003410    | Pdrg1,Pdrg,AU020945,AV006589,1110004D19Rik          | 0.00004  | -1.93481 |
| NM_019417   | Pdlim4,Ril                                          | 0.00083  | -1.90827 |
| BC027196    | Pdk1,B830012B01,D530020C15Rik                       | 5.28E-17 | -2.45535 |
| NM_011050   | Pdcd4,TIS,MA-3,D19Ucla1                             | 1.23E-07 | -1.61069 |
| AFFX-PYRUCA | Pcx,Pc                                              | 0.00036  | -1.67036 |
| NM_008791   | Pcp4,Pcp-4,P16Rimb19                                | 6.90E-11 | -3.36573 |
| BE865033    | Pcp2,L7,Pcp-2                                       | 0.00022  | -2.15761 |
| AF352788    | Pcolce2,Pcpe2,2400001O18Rik                         | 1.99E-07 | -2.07194 |
| AA673515    | Pcnt,KEN,Pcnt2,C86676,kendrin,AW476095              | 0.00032  | -2.72841 |
| AW106963    | Pck1,PEPCK,Pck-1,AI265463                           | 0.00006  | -4.03111 |
| AV094898    | Pcaf,AI461839,AW536563,A930006P13Rik                | 7.25E-06 | -1.67549 |
| BQ176847    | Pbef1,Pbef,Nampt,AI314458,1110035O14Rik             | 0.00043  | -1.64898 |
| NM_008782   | Pax5,KLP,BSAP,EBB-1,Pax-5                           | 0.00082  | -2.81416 |
| AV103696    | Paqr9,1700020G04Rik                                 | 0.00086  | -2.93456 |
| AV265674    | Paqr8,1700019B16Rik,3110001D06Rik                   | 0.00058  | -1.95863 |
| BC022922    | Paqr7,mPR,Mpra,PGLP,AV001994,BB007237,2310021M12Rik | 0.00011  | -1.89277 |

|           |                                                    |          |           |
|-----------|----------------------------------------------------|----------|-----------|
| AV220875  | Panx3,3230401P04,4833413G11Rik                     | 0.00062  | -24.59204 |
| AK017345  | Pank1,Pank,Pank1a,                                 | 1.20E-08 | -2.20089  |
| NM_013626 | Pam                                                | 2.73E-11 | -1.68145  |
| AI152156  | Pa2g4,Ebp1,38kDa,Plfap,AA672939                    | 2.78E-08 | -1.92578  |
| AF089751  | P2rx4,P2X4,AI504491,AW555605,D5Erd444e             | 0.00004  | -1.93479  |
| NM_021879 | p,D7Nic1,D7H15S12,D7lcr28RN                        | 1.18E-06 | -3.82575  |
| BC021411  | Ovol1,Ovo1,movo1,BB147136                          | 5.61E-45 | -2.58633  |
| AK006346  | Otub2,OTB2,OTU2,AI413508,AW557219                  | 0.00018  | -2.29128  |
| NM_020573 | Osbp1a,Gm753,Osbp1b,G430090F17Rik                  | 2.07E-14 | -2.15853  |
| BC002146  | Ormdl2,0610012C09Rik                               | 3.17E-07 | -2.28465  |
| BC025572  | Ormdl1,C730042F17Rik                               | 3.08E-09 | -1.74283  |
| BE628912  | Orm1,Agp-1,Agp-2,Orm-1                             | 0.00023  | -1.79833  |
| BI409406  | Omp                                                | 0.00014  | -2.739    |
| AB038696  | Olig1,Olg-1,Bhlhb6,Oligo1,AI836478,AW494459        | 0.00001  | -3.68331  |
| BB132229  | Olfr78,PSGR,RA1c,MOL2.3,MOR18-2,4633402A21Rik      | 5.67E-06 | -2.75657  |
| BB542051  | Ogn,OG,OIF,SLRR3A,mimecan,mimican,3110079A16Rik    | 1.75E-16 | -2.73681  |
| BB519474  | Odc1,ODC,MGC103389                                 | 0        | -2.29883  |
| NM_008756 | Ocln,Ocl                                           | 2.12E-07 | -1.76205  |
| BC025020  | Oact2,AU022889,AW547221,2810049G06Rik              | 0.0008   | -2.00771  |
| NM_130858 | Nxph3                                              | 0.00012  | -2.44901  |
| NM_019738 | Nupr1,p8,Com1,2310032H04Rik                        | 1.34E-18 | -3.01395  |
| AV037573  | Nt5c3,p36,Nt5y,PN-1,PN-I,PSN1,UMPH                 | 1.50E-20 | -2.44055  |
| NM_016710 | Nsbp1,GARP45,NBP-45,MGC103386                      | 2.74E-06 | -1.58419  |
| NM_032002 | Nrg4,AI552600                                      | 3.51E-06 | -2.79451  |
| BC026832  | Nrd1,NRD-C,AI875733,MGC25477,2600011I06Rik         | 1.40E-07 | -1.627    |
| NM_010933 | Nppc,CNP                                           | 0.00057  | -2.77541  |
| BC022734  | Npl,0610033B02Rik                                  | 4.93E-08 | -9.7555   |
| BC016107  | Npal2,Nipal2,9330161F08Rik                         | 6.37E-26 | -2.56134  |
| X96585    | Nov,C130088N23Rik                                  | 0.00064  | -2.42059  |
| AW121498  | Nos3as,eONE,sONE,Gm574,Apg912,Apg9I2,Apgdc2        | 1.69E-07 | -2.40821  |
| AK004120  | Nola3,NOP10,NOP10P,1110036B12Rik                   | 0.00005  | -1.58743  |
| BC007151  | Nol1,120kDa,A530002O17                             | 0.00013  | -1.87786  |
| AV156640  | Nme1,NM23A,AL024257                                | 2.03E-12 | -1.51751  |
| BC019952  | Nkd2,AW212591,2210403L10Rik                        | 9.22E-06 | -3.65588  |
| NM_016720 | Neu3                                               | 0.00015  | -2.40526  |
| AV161987  | Ndufb9,1190008J14Rik                               | 6.70E-31 | -1.58496  |
| NM_026614 | Ndufa5,2900002J19Rik                               | 1.54E-08 | -1.5167   |
| NM_008681 | Ndr1,Tdd5                                          | 0.00004  | -1.66237  |
| AV309418  | Ndr1,RTP,DRG1,NMSL,                                | 5.97E-11 | -2.03631  |
| AA038464  | Ndg2,AI267078,1620401E04Rik                        | 0.00006  | -1.91156  |
| BC026372  | Ndfip1,N4wbp5,0610010M22Rik                        | 1.95E-06 | -1.66036  |
| BE285362  | Ncbp2,20kDa,C79367,AA536802,AI843301,5930413E18Rik | 0.00043  | -1.70085  |
| AW537064  | Nav3,POMFIL1,unc53H3,                              | 9.61E-07 | -2.49534  |
| AK010275  | Napg,SNARE,2400003O04Rik                           | 5.96E-12 | -1.52903  |
| AW538068  | Nadk,MGC7589,BC004012                              | 1.15E-12 | -1.60762  |
| BE133806  | Myo6,sv,BC029719                                   | 4.28E-37 | -1.84353  |
| AJ002522  | Myh1,Ild,MdMs,Ild/x,Myhs-f,                        | 0.00085  | -11.40612 |
| BB046347  | Mycbp,Amy-1,AW552132,AW742590,5730488M09Rik        | 8.91E-12 | -1.85199  |
| NM_033597 | Myb,c-myb,M16449,AI550390,MGC18531                 | 0.00007  | -3.08103  |
| NM_138656 | Mvd,C78718                                         | 0.00043  | -1.84938  |
| NM_031188 | Mup1,Up-1,Ltn-1,Mup-1,Mup-a,Lvtn-1,2610016E04Rik   | 1.68E-09 | -12.48046 |

|           |                                                    |          |           |
|-----------|----------------------------------------------------|----------|-----------|
| NM_008645 | Mug1                                               | 1.81E-13 | -10.48495 |
| BE989081  | Mtdh,3D3,Lyric,AV353288,3D3/Lyric,D8Bwg1112e       | 0.00003  | -2.46647  |
| AV067008  | Mtch2,HSPC032,2310034D24Rik,4930539J07Rik          | 3.18E-12 | -1.61252  |
| AV337593  | Mtap2,MAP2,Mtap-2                                  | 1.14E-10 | -10.82077 |
| NM_008631 | Mt4,MT-IV                                          | 0.00002  | -10.55124 |
| AA796766  | Mt2,Mt-2,MT-II,AA409533                            | 3.55E-22 | -5.48017  |
| BC027262  | Mt1,MT-I,Mt-1                                      | 0.00008  | -4.66162  |
| NM_013601 | Msx2,Hox8,Hox-8,Hox8.1,BB122635                    | 0.00004  | -4.17545  |
| NM_008243 | Mst1,Hgfl,D3F15S2h,DNF15S2h,D9H3F15S2              | 0.00078  | -2.98132  |
| NM_026322 | MsrA,MSR-A,MGC101976,2310045J23Rik,6530413P12Rik   | 0.00046  | -1.66705  |
| NM_025796 | Mrpl33,0610009M10Rik                               | 0.00003  | -1.54909  |
| AI385618  | Mpz,P0,Mpp,P>0<,P-zero,P>zero<                     | 1.26E-15 | -9.93709  |
| BG066186  | Mpp7                                               | 1.32E-10 | -3.09836  |
| BC026425  | Mospd2,2410013I23Rik                               | 4.60E-07 | -1.70988  |
| BC018329  | Mospd1,MGC103065,1810018L05Rik                     | 1.82E-06 | -2.17958  |
| AK006387  | Mod1,Mdh-1,Mod-1,MGC91072,D9ErtD267e               | 0.00004  | -2.06412  |
| AI447812  | Mocs2,AI415403                                     | 0        | -2.24079  |
| AI839848  | Mobp,MOBP69,MOBP73,MOBP81                          | 6.67E-05 | -1.63459  |
| NM_011985 | Mmp23,CA-MMP,MGC130334,MGC130335                   | 0.00077  | -4.11738  |
| BC021914  | Mmd,AA690185,1200017E07Rik,1810073C06Rik           | 3.78E-20 | -2.68965  |
| NM_031378 | Mlze                                               | 4.95E-08 | -3.88782  |
| AF100171  | Mlf1,HLS7                                          | 5.25E-06 | -5.38115  |
| NM_021462 | Mknk2,Mnk2,Gprk7,2010016G11Rik                     | 2.28E-29 | -1.63593  |
| BB763517  | Mitf,bw,mi,wh,vit,vitiligo,MGC124309,MGC124310     | 4.73E-12 | -2.05476  |
| BB836564  | Minpp1,AA408516                                    | 3.67E-08 | -1.84112  |
| AF196480  | Mid2,FX2,Trim1                                     | 0.00035  | -1.65106  |
| NM_026524 | Mid1ip1,Mig12,3110038L01Rik                        | 0.00044  | -1.73155  |
| AV066880  | Mgst2,GST2,MGST-II,MGC41409                        | 3.22E-11 | -1.60982  |
| BI150149  | Mgst1,Gst,1500002K10Rik                            | 0        | -3.55455  |
| BI411560  | Mgll,Mgl,AA589436                                  | 1.01E-22 | -9.32143  |
| NM_133201 | Mfn2,Fzo,D630023P19Rik                             | 1.01E-10 | -1.99321  |
| BC022666  | Mfap4,RP23-155J3.5,1110007F23Rik                   | 1.83E-06 | -2.28805  |
| NM_025907 | Mettl6,AI467521,AU020711,1600013P15Rik             | 0.00015  | -2.23813  |
| BC024445  | Metrl,BC019776,MGC25696,9430048M07Rik              | 4.17E-26 | -2.28303  |
| BG086961  | Metap2,p67,Amp2,Mnpep,AI047573,AL024412,MGC102452  | 0        | -1.8454   |
| BG064851  | Metap1,AW047992,KIAA0094,mKIAA0094,1700029C17Rik   | 0.0001   | -1.6342   |
| AW555393  | Mest,Peg1,AA408879,AI256745                        | 0.00002  | -2.98673  |
| U13371    | Mdfic,Kdt1,Mdfid                                   | 4.45E-14 | -2.09722  |
| BC010486  | Mcts1,MCT-1,1500019M23Rik                          | 4.48E-09 | -1.74283  |
| NM_010777 | Mbp,mld,shi,Hmbpr,C76307,R75289,golli-mbp          | 0.00005  | -3.43772  |
| NM_010773 | Mbd2,MBD2a                                         | 0.00004  | -1.54043  |
| BB470596  | Mat2a,MGC6545,D630045P18Rik                        | 0.00053  | -1.71056  |
| BG076407  | Marveld2,MARVD2,Mrvldc2,BC003296,MGC55067          | 0.00011  | -2.35344  |
| AK005032  | March8,Mir,1300017E09Rik                           | 0.00016  | -1.75192  |
| BC027056  | Mapre2,EB1,EB2,RP1,AI314113,D18Abb1e,C820009F03Rik | 0.00008  | -2.29437  |
| NM_011950 | Mapk13,SAPK4,Serk4                                 | 1.52E-11 | -2.25781  |
| NM_016693 | Map3k6,MAPKKK6                                     | 3.86E-09 | -2.38704  |
| L13103    | Map3k1,Mekk,MEKK1,MAPKKK1                          | 1.76E-14 | -1.77013  |
| BB055232  | Map2k6,MEK6,MKK6,Prkmk6,SAPKK3                     | 0.00001  | -4.67053  |
| AU080586  | Map1lc3b,Map1lc3,1010001C15Rik                     | 1.01E-07 | -1.62268  |
| AK002644  | Mansc1,9130403P13Rik                               | 0.00035  | -1.96261  |

|           |                                                           |          |           |
|-----------|-----------------------------------------------------------|----------|-----------|
| BB127697  | Mal2,AI461653                                             | 2.83E-06 | -2.64073  |
| NM_025571 | Magmas,CGI-136,AV006767,2010110109Rik                     | 0.00002  | -1.62497  |
| NM_011942 | Lypla2,Lysoll                                             | 4.24E-10 | -1.69983  |
| NM_033478 | Ly6g6d,G6d,G6f,NG25,NG32,MEGT1,A930024F17Rik              | 1.40E-07 | -8.1163   |
| NM_010741 | Ly6c,Ly-6C,AA682074,AA959465                              | 0.00058  | -1.71939  |
| BC002070  | Ly6a,TAP,Sca1,Sca-1,Ly-6A.2,Ly-6A/E,Ly-6E.1               | 4.01E-06 | -1.73409  |
| AK014312  | Lum,Ldc,SLRR2D                                            | 6.01E-13 | -3.73041  |
| NM_008522 | Ltf,Lf,Ms10r,N lobe,MMS10-R                               | 2.69E-13 | -3.58924  |
| BC019794  | Lrrc3b,LRP15,BC019794,MGC30505                            | 1.23E-05 | -1.88843  |
| BC003305  | Lpl                                                       | 1.15E-06 | -4.29205  |
| M65143    | Lox,TSC-160,AI893619                                      | 6.14E-07 | -1.73606  |
| BC020118  | LOC435565                                                 | 0.00091  | -2.19152  |
| BG066943  | LOC213248                                                 | 0.00046  | -3.22227  |
| NM_010727 | LnX1,LnX                                                  | 0.00047  | -1.59901  |
| BC024836  | Lmo7,Gm914,C78582,FBXO20,mKIAA0858                        | 0.00032  | -1.80645  |
| AY033650  | Llglh2,MGC27928,9130006H11Rik                             | 0.00004  | -1.79164  |
| X16834    | Lgals3,GBP,L-34,gal3,Mac-2                                | 8.04E-07 | -1.8088   |
| AY029533  | Lass5,Trh4,AU045339,AW544927,2310081H14Rik                | 1.49E-11 | -2.044    |
| BB006809  | Lass4,Trh1,2900019C14Rik                                  | 1.70E-13 | -5.89836  |
| AJ294535  | Lancl1,p40,Gpr69,Gpr69a,AW124738                          | 1.95E-09 | -1.98186  |
| BB132473  | L1cam,L1,CD171,NCAM-L1                                    | 0.00001  | -1.7825   |
| AV007306  | Krtdap,Kdap,sk221                                         | 3.38E-07 | -1.9405   |
| D89901    | Krtap6-3,HGTpII.3                                         | 1.07E-08 | -13.43688 |
| NM_015809 | Krtap5-4                                                  | 8.33E-10 | -12.32653 |
| NM_027844 | Krtap5-2,4833428E21Rik                                    | 6.14E-07 | -9.86666  |
| NM_015808 | Krtap5-1                                                  | 2.03E-07 | -8.67681  |
| AF345294  | Krtap16-4                                                 | 0.00002  | -7.36828  |
| AA930779  | Krtap16-2                                                 | 0.00036  | -2.62256  |
| NM_010671 | Krtap13,4C32                                              | 0        | -100      |
| NM_010670 | Krtap12-1,AI507309,AI586068,D10Jhu14e,MGC130277,MGC130278 | 1.17E-08 | -8.86336  |
| AF312019  | Krt2-ps1,kertain complex 2,                               | 4.80E-07 | -7.5166   |
| X74784    | Krt2-17,Krt2e,Krt2-2,BB005427                             | 0        | -58.92218 |
| AY028607  | Krt2-16,HRb-1,Krt2-3,AV235125                             | 0        | -100      |
| X65506    | Krt1-5,HRa-1,Krt1-22                                      | 0        | -100      |
| NM_016880 | Krt1-24,Ha5,Krtha5,AI662400                               | 0.00004  | -6.92905  |
| NM_033373 | Krt1-23,K23,CK23,Haik1                                    | 1.02E-07 | -4.6031   |
| NM_010665 | Krt1-2,Ha3,mHa2                                           | 6.04E-09 | -7.36094  |
| AK014360  | Krt1-10,K10,K1C1,Krt-1.10,D130054E02Rik                   | 1.02E-07 | -2.24574  |
| BB815530  | Kitl,Gb,SF,Sl,Clo,Con,Mgf,SCF,SLF,Steel,contrasted        | 4.09E-06 | -1.58636  |
| BC016221  | Kif1c,Ltxs1,D11Bwg1349e,B430105J22Rik                     | 1.40E-11 | -1.53376  |
| BQ175246  | Kif1b,D4Mil1e,AI448212,                                   | 5.65E-06 | -1.54199  |
| NM_026214 | Kctd4,AU017169,2210017A09Rik                              | 0.0002   | -2.19007  |
| BM220945  | Kctd12,Pfet1,Pfetin,AU046135,AW538430,6430514H16          | 5.45E-10 | -1.85811  |
| NM_010607 | Kcnk2,TREK-1,AI848635,A430027H14Rik                       | 1.52E-08 | -2.83498  |
| NM_027398 | Kcnp1,KCHIP1,AI842357,AW494471                            | 0.00092  | -1.89489  |
| NM_145922 | Kcnc4                                                     | 0.00034  | -1.34561  |
| BQ175978  | Kcna1,MBK1,Mk-1,Shak,Kv1.1,mceph,Kca1-1,AI840627          | 0.00002  | -2.12051  |
| BB469300  | Kbtbd8,Takrp,AU040152,MGC91215,mKIAA1842                  | 0.00007  | -2.59015  |
| AI842353  | Kazald1,Bono1,AI842353,IGFBP-rP10                         | 0.00074  | -1.92785  |
| BF227962  | Jmy                                                       | 0.00079  | -1.90513  |
| BM293452  | Jarid2,Jmj,C79929,C79931,AI317256,AU045941                | 0.00053  | -1.64121  |

|           |                                                           |          |           |
|-----------|-----------------------------------------------------------|----------|-----------|
| BI966443  | ltn2a,E25,ltn2,AW108051                                   | 0.00013  | -2.01726  |
| M57525    | ll1rn,IL-1ra,F630041P17Rik                                | 0.00066  | -2.12349  |
| NM_010555 | ll1r2,CD121b,ll1r-2                                       | 3.33E-11 | -2.49362  |
| AV232344  | ll1f5,IL-1H3,IL1HY1,AI413231,FIL1delta                    | 0.00003  | -1.76962  |
| AY071844  | ll1f10,MGC130267,MGC130268                                | 9.59E-19 | -6.23155  |
| NM_008360 | ll18,lgif,il-18                                           | 1.27E-16 | -3.26306  |
| NM_134159 | ll17rc,il17rl,IL-17RC,IL17-RC,IL17-RL,1110025H02Rik       | 4.85E-07 | -3.67494  |
| BF225802  | lgfbp5,IGFBP-5,AI256729,AW208790                          | 1.18E-24 | -10.68208 |
| AV175389  | lgfbp3,IGFBP-3,IGgfbp3,AI649005                           | 7.48E-17 | -1.90535  |
| BG075165  | lgf1,lgf-1,lgf-l,C730016P09Rik                            | 4.93E-07 | -2.42759  |
| AY082613  | lft20,AU015496,RP23-399H5.8,0610009H04Rik                 | 1.82E-08 | -2.12839  |
| NM_013562 | lfrd1,PC4,lfnl,Tis7                                       | 7.09E-40 | -1.98418  |
| BC004801  | ldi1,MGC8139,MGC118013,4832416K17Rik                      | 7.19E-22 | -1.74772  |
| BF019883  | ldb2,C78922,AI255428                                      | 2.82E-06 | -1.70506  |
| BM231738  | hyou1,Cab140,Grp170,Orp150,CBP-140,AI415631               | 0.00014  | -1.64169  |
| NM_010489 | hyal2,AI256841,AU020858,AW555733                          | 0.00063  | -1.75929  |
| AF061972  | htatip2,CC3,30kDa,TIP30,AW111545                          | 8.93E-08 | -2.15018  |
| AF250139  | hspb8,H11,Cryac,E2IG1,                                    | 1.17E-09 | -3.55594  |
| U03561    | hspb1,27kDa,Hsp25                                         | 0.00038  | -1.9111   |
| BC004714  | hspa2,70kDa,HSP70.2,HSP70A2,Hsp70-2,MGC7795,MGC58299      | 9.88E-07 | -2.09614  |
| NM_015765 | hspa14,70kDa,NST-1,HSP70L1,Hsp70-4                        | 1.47E-10 | -1.85318  |
| BM200015  | hsdl2,2610207I16Rik                                       | 0.00088  | -1.57287  |
| AK012103  | hsd17b12,Kik1,KIK-I,AI172963,2610510O05Rik                | 1.18E-15 | -1.8089   |
| AY027660  | hrnr,S100a18,AV011854,S100a18-ps1,                        | 0        | -7.94951  |
| AF193796  | hoxc13                                                    | 7.34E-10 | -2.21077  |
| AB017136  | homer2,CPD,Vesl-2,Cupidin,AW539445                        | 1.61E-36 | -3.02027  |
| BC024546  | hod,Hop,Ob1,Obl,Hdop,Toto,Cameo,                          | 8.54E-10 | -1.97094  |
| NM_080462 | hnmt,AI788969,1500031F01Rik                               | 0.00017  | -2.71751  |
| NM_010442 | hmox1,HO-1,Hmox,Hemox,Hsp32,D8Wsu38e                      | 0.00001  | -2.29033  |
| BB705380  | hmgcs1,MGC36662,MGC98430,B130032C06Rik                    | 0        | -1.50934  |
| BB744589  | hlf,E230015K02Rik                                         | 0.00045  | -2.34151  |
| BC010564  | hist2h2aa1,Hist2,H2a-615,AI448581                         | 0.00004  | -1.90824  |
| M25487    | hist1h2bp                                                 | 0.00006  | -1.81732  |
| NM_023422 | hist1h2bc,H2bfs,R74621,2610022J01Rik                      | 2.30E-11 | -2.38637  |
| NM_025798 | hint3,HINT4,HINT-4,0610010I17Rik                          | 6.26E-11 | -2.51084  |
| NM_019814 | higd1a,Hig1,AI303276,AW049839,2210020B17Rik,7420700H20Rik | 2.13E-09 | -1.79705  |
| NM_010422 | hexb                                                      | 0.00002  | -2.26194  |
| AK019546  | herc4,mKIAA1593,1700056O17Rik,4921531D01Rik               | 7.75E-15 | -1.7308   |
| NM_019487 | hebp2,SOUL                                                | 3.91E-13 | -2.67692  |
| BI696085  | hebp2,SOUL                                                | 0.00001  | -3.05482  |
| BF580567  | hcfc1r1,HPIP                                              | 8.16E-10 | -1.87928  |
| NM_134248 | havcr1                                                    | 4.30E-04 | -1.50346  |
| L07645    | hal,Hsd,his,histidase                                     | 1.61E-25 | -7.60789  |
| BI466860  | hagh,Glo2,Glo-2,Rsp29,BC019817                            | 1.86E-07 | -1.91841  |
| AV018774  | hadhsc,Hadh,AA409008,AU019341,AW742602                    | 9.11E-24 | -1.81875  |
| BF460630  | habp4,4933413D03Rik,4933428J01Rik                         | 0.00022  | -3.82652  |
| BF661121  | h2afj,MGC118637,E130307C13                                | 5.71E-07 | -1.5333   |
| NM_023123 | h19                                                       | 0.00012  | -3.10168  |
| BC024625  | guk1,GMK,Guk-1,AA409738,AL033299,AL033300,AV026611        | 6.83E-22 | -1.92812  |
| AI172943  | gsta3,Gst2-3                                              | 0.00001  | -3.34399  |
| NM_008182 | gsta2,Gstc2,Gst2-2,Gstc-2,MGC29061                        | 1.58E-31 | -16.87156 |

|           |                                                         |          |           |
|-----------|---------------------------------------------------------|----------|-----------|
| AI506986  | Gsdm1,Gsdm,H312E,BB149167                               | 4.14E-06 | -1.94995  |
| NM_024478 | Grpel1,MGC8152,AA408748,mt-GrpE#1,mt-Grpel1             | 9.75E-33 | -1.78338  |
| BC013080  | Grhl1,MGR,LBP-32,Tcfcp2l2                               | 3.06E-31 | -1.99958  |
| NM_011825 | Grem2,Prdc,Gremlin2                                     | 0.00009  | -1.70673  |
| AV259880  | Gramd3,NS3TP2,AW061306,9030613F08Rik,9130427A09Rik      | 6.64E-17 | -1.85575  |
| NM_008161 | Gpx3,GPx,AA960521                                       | 3.82E-06 | -4.30835  |
| AK008086  | Gpt1,Gpt-1,1300007J06Rik,2310022B03Rik                  | 0.00028  | -2.78423  |
| BQ175510  | Gpr37,Pael-R,AI848630                                   | 0.00005  | -3.71107  |
| AK016567  | Gpm6b,M6B,Gpm6,AI593561                                 | 1.22E-06 | -2.09296  |
| BF449735  | Gpm6a,M6A,Gpm6,MGC38999                                 | 0.00002  | -4.75769  |
| BB503189  | Gpd1,Gdc1,Gdc-1,AI747587,KIAA4010,mKIAA4010             | 0.00004  | -4.79603  |
| NM_008149 | Gpam,GPAT                                               | 8.81E-09 | -1.65101  |
| NM_018762 | Gp9,Cd42,GPIX,MGC130579                                 | 0.00001  | -3.32942  |
| NM_010321 | Gnmt                                                    | 6.21E-10 | -6.71142  |
| NM_025278 | Gng12,AA536815,AI115529,AI314170,AI842738,2010305F15Rik | 0.00007  | -1.66026  |
| BQ174580  | Gnai1,Gnai-1,AU046200,Gialpha1                          | 1.43E-09 | -1.72367  |
| BB626288  | Gm1752,Gm611,MGC15606                                   | 0.00072  | -2.75591  |
| BC016584  | Gltpl,C76925,C77564,1110001F24Rik                       | 3.05E-07 | -2.39825  |
| BB172698  | Glr2,Grx2,AI645710,1700010P22Rik                        | 0.00033  | -1.51142  |
| AF276917  | Glr1,Glr1,C86710,D13Wsu156e                             | 6.96E-13 | -2.81868  |
| NM_010291 | Gjb5,Gjb-5,Cx31.1,Cnx31.1                               | 1.16E-21 | -4.6388   |
| NM_008127 | Gjb4,Gjb-4,Cx30.3,Cnx30.3                               | 0.00012  | -1.6744   |
| NM_010281 | Ggh,gamma-GH                                            | 4.10E-11 | -1.52817  |
| BB550907  | Gdpd2,Gde3,Obdpl,9130017L10Rik                          | 1.65E-24 | -11.22792 |
| AK013138  | Gcat,Kbl,AI526977                                       | 0.00017  | -4.16743  |
| BM124000  | Gba2,F630034E04                                         | 8.15E-07 | -1.99674  |
| BB241507  | Gba,GC,GBA1,GLUC,GCase                                  | 1.27E-10 | -2.0778   |
| BI650268  | Gas5,Gas-5,MGC6251                                      | 7.63E-06 | -2.22662  |
| BE199211  | Gas2l3,Gm240,8430435B07Rik                              | 0.0006   | -3.11419  |
| AV302406  | Galnt7,AI225872                                         | 0.00093  | -1.89413  |
| NM_144731 | Galnf7                                                  | 0.00088  | -1.89234  |
| AK002510  | Gal3st1,CST,Gcst                                        | 4.15E-08 | -3.12593  |
| AI323528  | Gadd45b,Myd118,AI323528                                 | 7.71E-20 | -4.30363  |
| BC027245  | Gabrp,MGC38123                                          | 2.03E-09 | -2.69543  |
| BC027245  | Gabrp,MGC38123                                          | 1.75E-07 | -4.26198  |
| BF160931  | Gabarapl2,Gef2,GATE-16,AI173605,                        | 1.99E-14 | -1.9361   |
| NM_008062 | G6pdx,G28A,G6pd,Gpdx                                    | 5.46E-16 | -2.39701  |
| NM_008059 | G0s2,AI255151,AV006465                                  | 6.08E-08 | -4.46165  |
| AJ428065  | Fyco1,Mem2,RUFY3,ZFYVE7,2810409M01Rik                   | 0.00005  | -1.57761  |
| NM_033648 | Fxyd4,Chif,AI267073,MGC107631,0610008I02Rik             | 3.52E-12 | -3.97337  |
| BM054266  | Fuca2,0610025O11Rik,5530401P20Rik                       | 3.63E-15 | -2.16618  |
| AW490901  | Fts,Ft,Fif,Ft1,AL023020                                 | 1.44E-10 | -2.41218  |
| NM_008238 | Foxn1,nu,Whn,nude,Hfh11,MGC124316,                      | 0.00062  | -3.76292  |
| AV290700  | Fmod,SLRR2E,AI131919,AU041740                           | 9.78E-08 | -6.27733  |
| U41739    | Fhl1,KyoT,KyoT1,KyoT2                                   | 1.34E-06 | -2.45478  |
| NM_007994 | Fbp2,Fbp1,Fbp-1                                         | 0.00066  | -3.06678  |
| NM_019395 | Fbp1,Fbp2,Fbp-2,FBPase 1                                | 0.00024  | -4.50733  |
| NM_007986 | Fap                                                     | 0.00001  | -3.59985  |
| BG072083  | Fancg,Xrcc9,AU041407                                    | 0.00044  | -2.39213  |
| BI872590  | Fahd2a,Cgi-105,1500003K14Rik,B430104H02Rik              | 5.73E-06 | -1.59     |
| NM_007983 | Faf1,Fam,Dffrx,AA408698                                 | 9.33E-15 | -1.66959  |

|           |                                                          |          |           |
|-----------|----------------------------------------------------------|----------|-----------|
| BC002008  | Fabp5,Klbp,mal1                                          | 2.29E-06 | -1.80218  |
| BC002148  | Fabp4,Ap2,Lbpl,ALBP/Ap2                                  | 1.83E-12 | -3.68839  |
| BM118638  | Fa2h,FAAH,Faxdc1,G630055L08Rik                           | 0        | -16.77785 |
| BC024886  | F3,TF,Cf3,Cf-3,CD142,AA409063                            | 1.28E-12 | -5.7165   |
| NM_007969 | Expi,WDNM1                                               | 9.40E-08 | -2.99853  |
| NM_025276 | Evpl                                                     | 0.00033  | -1.91479  |
| BC015076  | Eva1,Eva,Mpzl2                                           | 7.39E-07 | -1.50449  |
| BI456953  | Etv3,Pe1,METS,AI414410                                   | 2.40E-22 | -1.86338  |
| BM234652  | Ero1l                                                    | 1.18E-12 | -1.87518  |
| AK014556  | Eps8l1,DRC3,EPS8R1,AW060268,2310051G19Rik,               | 3.70E-12 | -2.78002  |
| BM238943  | Eprs,Qprs,C79379,2410081F06Rik,3010002K18Rik             | 0.00016  | -1.51229  |
| BC026387  | Eppk1,EPIPL,EPIPL1,6230424I18Rik                         | 5.28E-10 | -1.72178  |
| BI684958  | Epb4.1l1,4.1N,NBL1,mKIAA0338                             | 0.00001  | -1.94009  |
| AV376291  | Entpd5,Pcph,Cd39l4,mNTPase,AI196558                      | 6.00E-06 | -1.81861  |
| AV255351  | Entpd4,Lysal1,AI414893,mKIAA0392,                        | 0.00047  | -2.2354   |
| BC005602  | Elovl7,AI840082,9130013K24Rik                            | 2.56E-11 | -2.35569  |
| NM_130450 | Elovl6,FAE,LCE,C77826,MGC107467                          | 3.55E-14 | -5.47688  |
| BB829575  | Elovl4                                                   | 0.00002  | -2.47806  |
| BC016468  | Elovl3,CIN-2,Cig30                                       | 3.59E-19 | -7.22443  |
| BB748075  | Elovl1,Ssc1,AA407424,BB151133                            | 3.30E-06 | -1.68313  |
| NM_138953 | Ell2                                                     | 3.13E-30 | -2.25308  |
| BC012424  | Elf5                                                     | 1.21E-06 | -3.72725  |
| BQ176989  | Elf5,MGC36374,MGC36509,D12Ert549e                        | 1.72E-06 | -1.80648  |
| AV216873  | Eif3s6ip,PAF67,HSP-66Y,MGC37328,0610011H21Rik            | 0.00071  | -1.96732  |
| NM_018799 | Eif3s2,36kDa,Trip1,D4Ert632e                             | 8.22E-13 | -1.53125  |
| BB379268  | Eif3s1,C78575,AA409117,AA409446,                         | 0.00011  | -1.59601  |
| AA985754  | Eif2s2,EIF2,38kDa,EIF2B,AA408636,AA571381                | 0        | -1.58243  |
| BQ175028  | Eif2s1,35kDa,Eif2a,eIF2alpha,0910001O23Rik,2410026C18Rik | 0.00024  | -1.5389   |
| AI327005  | Eif2b5                                                   | 9.52E-09 | -2.23919  |
| NM_010122 | Eif2b4,Eif2b                                             | 4.15E-12 | -2.6375   |
| BC003426  | Eif2b1,26kDa,EIF2B,EIF2BA,MGC6458,D5Ert406e              | 4.07E-31 | -2.19595  |
| NM_025437 | Eif1ay,AI426898,1500010B24Rik                            | 1.51E-23 | -1.8001   |
| BC006789  | Ehf,AU019492,9030625L19Rik                               | 0.00023  | -1.77666  |
| NM_010119 | Ehd1,Past1,RME-1,AA409636                                | 3.94E-07 | -1.52115  |
| BB284358  | Egln3,SM-20,AI505553,AI648162,2610021G09Rik              | 7.51E-07 | -1.90494  |
| AA388313  | Efna3,Epl3,EFL-2,Ehk1-L,LERK-3                           | 7.40E-07 | -2.10077  |
| BC019531  | Efhd1,PP3051,AI452351,MGC103094,4931430I01Rik            | 0.00002  | -4.88169  |
| BC023060  | Efemp1,MGC37612                                          | 4.47E-07 | -4.0353   |
| NM_007899 | Ecm1,p85,AI663821                                        | 2.28E-07 | -2.01278  |
| NM_025855 | Echdc1,AI314462,AI930038,D10Ert667e,1700028A24Rik        | 4.37E-16 | -4.25574  |
| NM_007898 | Ebp,Td,mSl,Pabp,AI255399                                 | 9.16E-11 | -1.601    |
| NM_025975 | Dynlt3,Tcte1l,AU042796,2310075M16Rik                     | 1.86E-12 | -1.62514  |
| NM_134068 | Dusp22,JKAP,JSP1,MKPX,                                   | 0.00019  | -1.62878  |
| AK009744  | Dusp14,Mkp6,MKP-L,D11Ert395e,                            | 8.33E-08 | -2.7308   |
| BB004080  | Dusp11,AI481497,2010300F21Rik                            | 1.41E-24 | -2.28344  |
| BC019480  | Dus1l,1110032N12Rik                                      | 0.00006  | -1.87072  |
| AV297961  | Dsp,DP,AA407887,AA407888,                                | 0.00007  | -1.64379  |
| NM_053090 | Drctnb1a                                                 | 0.00014  | -1.58225  |
| NM_010074 | Dpp4,Cd26,THAM,Dpp-4                                     | 8.99E-10 | -1.99408  |
| AK002562  | Dp1l1,Reep6,0610011M24Rik                                | 0.00004  | -2.53745  |
| BB396885  | Dnpep,AA407814                                           | 7.97E-06 | -1.63793  |



|           |                                                         |          |           |
|-----------|---------------------------------------------------------|----------|-----------|
| BB762738  | Dnm2                                                    | 2.82E-09 | -3.74788  |
| AK004575  | Dnaja3,Tid-1,Tid1l,C81173,1200003J13Rik,1810053A11Rik   | 0.00081  | -2.45355  |
| AW108486  | Dmpk,DM,Dm15                                            | 2.19E-26 | -5.2576   |
| NM_010056 | Dlx5,AI385752                                           | 2.83E-07 | -3.44416  |
| U79738    | Dlx3,Dlx-3,AV237891                                     | 0.00009  | -3.74005  |
| NM_007865 | Dll1,Delta1                                             | 0.00033  | -1.71082  |
| BC002232  | Dip3b                                                   | 1.11E-30 | -3.02757  |
| AK009385  | Dhrs7,retDSR4,retSDR4,AW061210,2310016E22Rik            | 0        | -6.68234  |
| NM_026819 | Dhrs1,AW112170,D14Ert484e,1110029G07Rik                 | 0.00004  | -2.58606  |
| BC004738  | Dhcr24,mKIAA0018,2310076D10Rik,5830417J06Rik            | 0.00004  | -1.62287  |
| AK002443  | Dgat2,DGAT-2,0610010B06Rik                              | 0        | -3.48271  |
| NM_007859 | Dffb,CAD,CPAN,40kDa,DF40,Didff,5730477D02Rik            | 0.00002  | -3.72816  |
| NM_021428 | Dexi,Myle,AI836170,AW413143,D16Bwg0586e,1810029J14Rik   | 0.00003  | -1.66759  |
| BC008266  | Dennd2d,MGC6915,AI451421,2010308M01Rik                  | 6.71E-06 | -2.71474  |
| AV286991  | Degs1,Degs,Des1,Mdes,AA536663                           | 8.19E-08 | -2.59177  |
| BC024380  | Defb1,mBD-1,AW260221                                    | 4.96E-08 | -2.58652  |
| AK003863  | Deb1,AI463209,1110020I04Rik                             | 2.31E-10 | -1.52687  |
| BB550183  | Dbp                                                     | 1.39E-06 | -2.23405  |
| BB115327  | Dbi,Acbb,ACBD1                                          | 8.42E-08 | -2.15473  |
| BB534613  | D830044I16Rik                                           | 0.00007  | -1.61078  |
| NM_138594 | D6Wsu163e,C12orf4                                       | 0.00002  | -1.64907  |
| BC019947  | D2Bwg0891e,R74724,                                      | 3.25E-06 | -1.7564   |
| D17892    | D17892                                                  | 0.00004  | -5.11275  |
| BC022097  | D15Wsu75e,AI427858,AI850401                             | 6.04E-15 | -2.31935  |
| NM_134007 | D10Ert214e,AU043990,AW743335                            | 0        | -2.81206  |
| NM_007817 | Cyp2f2,Cyp2f                                            | 1.73E-34 | -8.88807  |
| NM_007814 | Cyp2b19                                                 | 3.10E-21 | -8.11632  |
| AF128849  | Cyp2b10,p16,Cyp2b,Cyp2b20                               | 0.00002  | -9.40519  |
| NM_009992 | Cyp1a1,AHH,AHRR,CP11,P450-1                             | 2.30E-24 | -5.92054  |
| NM_007809 | Cyp17a1,Cyp17,p450c17                                   | 1.90E-10 | -10.21085 |
| AK005148  | Cyfp2,Pir121,AA930218,AU022376                          | 0.00004  | -2.20297  |
| BC025438  | Cyb5r4,b5b5r,B5+B5R,C79736,Ncb5or,                      | 1.62E-12 | -1.95631  |
| AK010858  | Cyb5r3,Dia1,Dia-1,C85115,0610016L08Rik,2500002N19Rik    | 0.00046  | -2.80751  |
| NM_019932 | Cxcl4,Pf4,Scyb4                                         | 0.00064  | -2.13891  |
| BB357580  | Cttnbp2,ORF4,Cortbp2,mKIAA1758,6430526E05,4732477G22Rik | 3.92E-06 | -2.54378  |
| NM_007799 | Ctse,CE,CatE,A430072O03Rik,C920004C08Rik                | 6.07E-07 | -3.65742  |
| BF457754  | Ctnnbip1,ICAT,AW457332,Catnbip1,1110008O09Rik           | 1.02E-09 | -1.92574  |
| BC019483  | Cth,Cys3,AI314617,BC019483,MGC28655,0610010I13Rik       | 8.59E-09 | -5.24437  |
| AI323359  | Csf1r,Fms,CD115,Csfmr,Fim-2,CSF-1R,M-CSFR,AI323359      | 3.60E-06 | -1.96293  |
| BB248249  | Csdc2,Pippin,AI415250,AI481750                          | 3.03E-10 | -4.86888  |
| AK013953  | Crygf,Len-2,Cryg-2,DGcry-2,3110001K11Rik                | 4.37E-13 | -3.47954  |
| NM_007773 | Crybb2,Aey2,Phil,Cryb-2                                 | 7.49E-08 | -4.86217  |
| BB161253  | Crif3,Crif2,Creme9,Cytor4,BB164954                      | 7.40E-09 | -1.89361  |
| NM_009638 | Crisp1,Aeg1,CRISP-1,AW324342                            | 5.26E-06 | -6.48356  |
| BC027426  | Creg1,Creg,AA755314                                     | 8.58E-06 | -1.65541  |
| AU015319  | Crb3,AU015179,AU041752,5730439B18                       | 0.00075  | -1.62485  |
| BC006668  | Crat,CARAT,AW107812                                     | 0.00035  | -2.10387  |
| NM_013496 | Crabp1,Rbp-5,Crabpl,Crabp-1,AI326249                    | 0.00006  | -3.50556  |
| AV231491  | Cpeb2,A630055H10Rik                                     | 8.76E-15 | -2.17846  |
| BM941165  | Cox17,AI037035                                          | 2.34E-07 | -1.90141  |

|           |                                                         |          |           |
|-----------|---------------------------------------------------------|----------|-----------|
| BG974128  | Cops7a,D6ErtD35e                                        | 0.00097  | -1.82233  |
| NM_017478 | Copg2,AW227625                                          | 0.00002  | -1.68164  |
| BB264843  | CommD9,AA409293,1810029F08Rik                           | 7.24E-25 | -1.94198  |
| BE133720  | CommD6,1110059J08Rik,1700063H17Rik                      | 4.78E-07 | -1.54926  |
| BF227507  | Col1a2,oim,Cola2,Cola-2,Col1a-2,AA960264,AI325291       | 4.49E-10 | -1.62761  |
| AK004399  | Cntn1,CNTN,F3cam,AW495098                               | 1.11E-16 | -8.06858  |
| NM_033570 | Cnnm4,AcDp4,5430430O18Rik                               | 0.00003  | -1.90929  |
| NM_020612 | Cmar                                                    | 1.90E-06 | -2.2154   |
| AV152288  | Clu,Cli,ApoJ,Sgp2,SP-40,Sgp-2,Sugp-2,AI893575,D14Ucla3  | 1.61E-14 | -1.61541  |
| AF033565  | Clk3,AI256811,MGC36552,MGC103028                        | 5.27E-12 | -1.9467   |
| AK009020  | Clic3,2300003G24Rik                                     | 8.61E-15 | -4.98534  |
| NM_009131 | Clec11a,Scgf,Clecsf3,AW457320                           | 9.26E-14 | -3.44157  |
| BC003868  | Cldn8,AI648025                                          | 6.78E-10 | -4.67894  |
| BC019534  | Cldn23,2310014B08Rik                                    | 0.00007  | -4.68001  |
| T25545    | Clcn5,Clc5,T25545,5430408K11Rik,D930009B12Rik           | 0.00004  | -2.3165   |
| BI739053  | Clcn3,Clc3                                              | 0.00085  | -1.52727  |
| NM_019952 | Clcf1,CLC,Bsf3,MGC129162,MGC129163                      | 0.00009  | -2.54598  |
| NM_007702 | Cidea,AW212747                                          | 4.43E-07 | -3.53307  |
| BC019472  | Churc1,chch,My015,1700030P15Rik                         | 1.77E-06 | -1.71136  |
| NM_021439 | Chst11,C4s,C4ST,C4ST1,C4ST-1,1110020P09Rik              | 7.72E-06 | -2.40387  |
| NM_009893 | Chrd,Chd                                                | 0.00005  | -3.01968  |
| BI692256  | Chchd7,1810049H20Rik                                    | 1.76E-11 | -1.89608  |
| BC025169  | Chac1,1810008K03Rik                                     | 0.00022  | -3.89196  |
| NM_133869 | Cept1,AI788721,BB118941,9930118K05Rik                   | 0.00029  | -1.75556  |
| BM231053  | Cdsn,AI747712                                           | 5.13E-25 | -3.26382  |
| NM_007672 | Cdr2,AA617262                                           | 2.87E-39 | -3.55135  |
| AK007630  | Cdkn1a,P21,CDK1,CIP1,SDI1,                              | 3.36E-11 | -1.93801  |
| AI646399  | Cd3z,Cd3,T3z,Cd3h,TCRk,                                 | 5.88E-06 | -3.68223  |
| BB534670  | Cd36,FAT,GPIV,Scarb3                                    | 0.00009  | -3.00826  |
| AV084904  | Ccl6,c10,MRP-1,Scya6                                    | 2.52E-06 | -3.43128  |
| C76605    | Ccdc12,C76605,2700094L05Rik                             | 0.0003   | -1.64276  |
| NM_007625 | Cbx4,MPC2                                               | 6.06E-10 | -1.87783  |
| BC026595  | Cbs,HIP4,AI047524,AI303044,                             | 0.00069  | -2.39554  |
| NM_007606 | Car3,Car-3,BB219044                                     | 3.36E-10 | -11.89764 |
| AK010166  | Car13,2310075C21Rik                                     | 1.57E-16 | -2.14183  |
| AB050203  | Capn8,nCL-2,nCL-2'                                      | 7.48E-06 | -3.67139  |
| BG071931  | Camk1d,CKLiK,A630059D12Rik,E030025C11Rik                | 0.00049  | -2.12091  |
| NM_027416 | Calml3,AI326174,2310068O22Rik                           | 4.83E-07 | -2.33263  |
| BQ174680  | Cacng5                                                  | 0.00016  | -2.76235  |
| AU016322  | C86187                                                  | 0.00008  | -2.7164   |
| NM_030888 | C1qtnf3,Cors,CTRP3,Corcs,CORS-26,AI315029,2310005P21Rik | 0.00008  | -3.55776  |
| NM_021550 | C1galt1c1,C81205,AB030184,1500002I11Rik                 | 2.93E-06 | -1.55861  |
| NM_009770 | Btg3,ANA,tob5                                           | 1.91E-07 | -2.19023  |
| AV231340  | Btc                                                     | 1.54E-08 | -6.53029  |
| BB223872  | Bscl2,Gng3lg,seipin,AI046355,2900097C17Rik              | 4.74E-27 | -2.64925  |
| BC018324  | Brp44,ESTM43,AA108335,0610006C01Rik                     | 5.71E-35 | -1.73258  |
| BB610351  | Bola3,1810056O20Rik                                     | 0.00087  | -1.59905  |
| BE992311  | Bola2,Bola-2,1110025L05Rik                              | 6.32E-07 | -1.58844  |
| NM_009760 | Bnip3,Nip3                                              | 0.00008  | -2.37156  |
| BB329439  | Bmp2k,BIKE,AA673486,AV128808,4933417M22Rik              | 2.45E-07 | -1.73485  |
| AV239587  | Bmp2,Bmp2a,AI467020                                     | 1.05E-25 | -5.2395   |

|           |                                                             |          |           |
|-----------|-------------------------------------------------------------|----------|-----------|
| AF068182  | Blnk,Bca,BASH,Ly57,Ly-57,Lyw-57,SLP-65                      | 7.96E-08 | -1.69594  |
| NM_007541 | Bglap1,OC,OG1,Bglap,mOC-A                                   | 4.03E-23 | -3.50019  |
| NM_009760 | Bdnf                                                        | 3.40E-05 | -1.76012  |
| AA407595  | Bccdin3,D5Wsu46e,MGC28888,MGC30590                          | 0.00017  | -1.75522  |
| AV094648  | Bcap31,Bap31                                                | 7.46E-18 | -1.72625  |
| AY092026  | BC054059,SMAF1                                              | 2.52E-09 | -4.25906  |
| AV012073  | BC027309,MGC28139                                           | 0.00012  | -3.71445  |
| BC026374  | BC026374,MGC31116                                           | 3.65E-17 | -12.43562 |
| BC019561  | BC019561,MGC28728,A230074A19Rik                             | 0.00076  | -3.21435  |
| AF118272  | BC018473                                                    | 0.00012  | -2.5103   |
| BC025823  | BC011467,MGC37865                                           | 1.94E-27 | -3.01447  |
| BC004728  | BC004728,Smagp,MGC7903                                      | 0.00081  | -2.07942  |
| NM_030561 | BC004004,MGC7550,2400006G15Rik                              | 1.34E-10 | -1.6103   |
| BG071718  | Bat5,NG26,Bat-5,MGC19234,D17H6S82E                          | 1.29E-06 | -1.91035  |
| AF153440  | Bambi,2610003H06Rik                                         | 4.10E-12 | -4.17717  |
| BG066773  | B4galt6,AA536803,AU022389                                   | 0.00086  | -2.11074  |
| BB769694  | B230312A22Rik,KIAA1539,mKIAA1539                            | 1.29E-11 | -2.2583   |
| BC002154  | AW125753,Nse1,2310003N02Rik,4731402F03Rik                   | 6.31E-11 | -1.52942  |
| BC026642  | AW049765,Stap2                                              | 1.30E-06 | -2.19768  |
| BI649826  | Avpi1,esu,VIT32,mVIT32,AA410041,2310008N12Rik               | 0.00014  | -1.94214  |
| BB397506  | Attp,8430408E05Rik                                          | 4.20E-06 | -1.76626  |
| AW610650  | Atp8a1,APLT,Atp3a2,Class I,                                 | 0.00049  | -2.6775   |
| BG072708  | Atp7a,Mo,br,Blo,l14,MNK,blotchy,mottled,brindled,DXHXS1608e | 5.46E-25 | -2.25297  |
| BI154058  | Atp6v1g1,VAG1,ATP6J,Vma10,Atp6g1,AA960677                   | 0.00011  | -1.53425  |
| AV105788  | Atp6v1d,VATD,Vma8,Atp6m,1110004P10Rik                       | 7.32E-14 | -1.67493  |
| AV339131  | Atp6v0b,Atp6f,VMA16,2310024H13Rik                           | 0.00051  | -1.56128  |
| AF218252  | Atp6v0a2,Tj6,Stv1,TJ6M,TJ6s,ATP6a2,                         | 0.00052  | -2.75428  |
| NM_007507 | Atp5k,Lfm1,MGC107302,2610008D24Rik                          | 0.00004  | -1.51062  |
| AV240631  | Atg4b,Apg4b,Aut1,Atg4bl,2510009N07Rik                       | 4.35E-19 | -2.13591  |
| BC005552  | Asns                                                        | 4.56E-07 | -1.69504  |
| AV212753  | Asns                                                        | 8.23E-06 | -1.69982  |
| NM_134162 | Asah3,Cer1,AI662009,2310024P18Rik                           | 1.17E-06 | -6.27211  |
| BB322201  | Arx                                                         | 0.00004  | -3.90831  |
| NM_011790 | Arih2,ARI2,UIP48,TRIAD1,AI843547                            | 0.00048  | -2.34871  |
| BC024657  | Apoc4,Acl                                                   | 0.00018  | -3.15774  |
| NM_007469 | Apoc1                                                       | 0.0008   | -1.54707  |
| BB770932  | Apcdd1,Drapp1,EIG180,AB023957,AU041258                      | 0.00007  | -1.78651  |
| BB271021  | Apcdd1                                                      | 3.83E-09 | -2.0089   |
| BC001985  | Ap4s1,AI314282                                              | 6.99E-14 | -1.74508  |
| NM_023631 | Aox4,AOH2,2310003G12Rik                                     | 0        | -10.67264 |
| NM_009675 | Aoc3,SSAO,VAP1                                              | 0.00027  | -3.08059  |
| BC022726  | Ankrd33,MGC31569,A930021G21Rik                              | 0.00005  | -2.56553  |
| AV104707  | Ankrd13c,AI505652                                           | 1.49E-12 | -1.54949  |
| BB628935  | Ank3,AnkG,Ank-3,MGC14049,Ankyrin 3                          | 1.88E-07 | -1.56119  |
| NM_009665 | Amd1,Amd-1,AdoMetDC,MGC91044,MGC102468                      | 1.03E-07 | -1.86555  |
| NM_011786 | Aloxe3,e-LOX-3                                              | 1.00E-08 | -2.777    |
| BB554189  | Alox12,P-12LO,Alox12p,9930022G08Rik                         | 1.97E-06 | -5.36017  |
| BC024112  | Aldob,Aldo2,Aldo-2,BC016435,MGC36398                        | 0.00031  | -2.44684  |
| AW146041  | Akr1c21,AI315367,MGC102401,9430025F20Rik                    | 0.00027  | -10.30778 |
| BM233292  | Aim1,AI462491,AI463325                                      | 0.00006  | -1.62906  |
| BQ175572  | AI838259                                                    | 0.00003  | -3.51976  |

|           |                                                     |          |           |
|-----------|-----------------------------------------------------|----------|-----------|
| BC006605  | Al661453                                            | 0.00002  | -2.15741  |
| BG066303  | Al450241                                            | 0.00007  | -2.60348  |
| D50523    | Al316828,TUG1,taurine upregulated gene 1            | 0.00007  | -1.95298  |
| BE994529  | Agpat4,1500003P24Rik                                | 0.00002  | -3.1723   |
| AK005139  | Agpat4,1500003P24Rik                                | 2.03E-08 | -4.58655  |
| NM_133919 | Aff1,Af4,Rob,Mllt2h,AW319193,9630032B01Rik          | 0.00037  | -1.68924  |
| BG064927  | Aebp2,B230313N05Rik                                 | 9.76E-20 | -1.74937  |
| NM_054088 | Adpn                                                | 2.79E-09 | -3.38974  |
| NM_013459 | Adn,DF,factor D                                     | 0.00001  | -4.83144  |
| BG074607  | Adipor2,ADCR2,Paqr2,Al115388,AW554121               | 3.76E-16 | -1.77929  |
| AV301634  | Adipor1,Paqr1,ACDCR1,CGI-45,2810031L11Rik           | 2.01E-08 | -1.58908  |
| NM_009605 | Adipoq,Acdc,apM1,30kDa,GBP28,adipo,Acrp30           | 7.60E-14 | -9.1008   |
| AK007397  | Adh6a,Adh5a,1810009C16Rik                           | 0.00042  | -22.5019  |
| BC013477  | Adh1,Adh-1,ADH-AA,Adh-1e,                           | 0        | -23.52399 |
| NM_007408 | Adfp,ADPH,Adrp,AA407157                             | 4.51E-08 | -1.8694   |
| NM_007393 | Actb,Actx,beta-actin,E430023M04Rik                  | 7.34E-19 | -1.97311  |
| NM_019811 | Acss2,ACAS,Acs1,Acas1,Acas2,AceCS1,1110017C11Rik    | 0.00003  | -1.68796  |
| AB022340  | Acsm3,Sa,Sah                                        | 5.27E-07 | -10.08947 |
| AK006541  | Acs15,ACS2,ACS5,Faci5,1700030F05Rik                 | 6.31E-06 | -2.06288  |
| BC006692  | Acs11,Acs,Acas,FACS,Acas1,Faci2                     | 3.06E-39 | -2.72673  |
| NM_053178 | Acsbg1,BG1,Lpd,R75185,mKIAA0631,E230019G03Rik       | 1.08E-16 | -7.13279  |
| NM_019811 | Acas2                                               | 2.34E-05 | -1.68796  |
| BC026559  | Acadvl,vlcad                                        | 0.00013  | -1.81799  |
| AV235115  | Acad9,NPD002,4732402K02,2600017P15Rik,C630012L17Rik | 0.00014  | -1.95384  |
| BC022940  | Acacb,Acc2,Accb,Al597064,AW743042                   | 0.00053  | -3.53541  |
| BC024677  | Abpb,C2a,Scgb2b5                                    | 7.99E-08 | -2.9891   |
| BG065289  | Ablim1,Limab1,abLIM-L,                              | 4.56E-07 | -1.63379  |
| BC026627  | Abi3bp,TARSH,Al506287,BG172926                      | 3.61E-20 | -2.9541   |
| AK007421  | Abhd5,CDS,IECN5,NCIE2,CGI-58                        | 0.00071  | -1.72437  |
| BG067888  | Aak1,C79663,R75501,AU067724,                        | 0.00001  | -1.59683  |
| NM_023383 | Aadac,Aada,Al265437,5033417E09Rik                   | 8.37E-21 | -3.90338  |
| BI248354  | AA536743                                            | 0.00025  | -1.52662  |
| NM_008896 | A130027P21Rik                                       | 1.18E-23 | -1.89394  |
| AK002962  | A030009H04Rik,AA589459,AB041807                     | 0.00009  | -2.05316  |
| NM_030006 | A030005L19Rik                                       | 6.62E-10 | -17.1163  |
| NM_030005 | A030005K14Rik,BB150353                              | 1.81E-08 | -8.8783   |
| AI256077  | 9530008L14Rik                                       | 0        | -12.8443  |
| BC023401  | 9130404D08Rik,C77863,C79014,KIAA0892,               | 0.00019  | -1.57653  |
| NM_025779 | 9030408N13Rik                                       | 0.00001  | -2.94041  |
| BG066131  | 8430420C20Rik                                       | 2.13E-08 | -2.28838  |
| AW108242  | 8030451F13Rik                                       | 0.00006  | -2.37618  |
| AW549928  | 6720475J19Rik                                       | 4.72E-13 | -2.50818  |
| BF011349  | 6620401M08Rik,1700006C13Rik                         | 0.00013  | -5.0686   |
| BB667858  | 6330578E17Rik,1700001A24Rik                         | 0.00001  | -1.6079   |
| BB460424  | 6330505F04Rik,D130066O12,4930535D10Rik              | 0.00087  | -2.15427  |
| AV328515  | 6330442E10Rik,AU019070,9830138K24                   | 2.66E-06 | -4.65232  |
| AK018153  | 6330409N04Rik                                       | 1.12E-09 | -2.20673  |
| BM876992  | 5830415L20Rik,2900022K02Rik                         | 0.00073  | -1.85536  |
| AV313559  | 5830411E10Rik,Nabp1,                                | 0.00006  | -3.15881  |
| BB005022  | 5830404H04Rik,Al314146,Al449533,                    | 0.00002  | -3.10651  |
| BC017138  | 5730596K20Rik,Al465397,MGC28761,4633402C03Rik       | 0.00006  | -1.70411  |

|           |                                                  |          |           |
|-----------|--------------------------------------------------|----------|-----------|
| BB257344  | 5730408K05Rik                                    | 0.0001   | -2.43415  |
| AK004916  | 5730405M13Rik,AU041636,AW552395,1300006G11Rik    | 0.00029  | -1.99184  |
| NM_027778 | 5530401N06Rik                                    | 5.83E-06 | -7.60305  |
| BM205212  | 5330427D05Rik,5033421J10Rik                      | 0.00004  | -5.05984  |
| BB006121  | 4933439C20Rik,MGC65558,MGC103350                 | 0.00002  | -1.70093  |
| BB096900  | 4933402J24Rik                                    | 0.0001   | -2.58106  |
| BB510904  | 4930520K10Rik                                    | 0.00089  | -2.10565  |
| BB242046  | 4930507D05Rik                                    | 0.00048  | -2.43125  |
| AK015432  | 4930449I04Rik                                    | 0.00025  | -2.56963  |
| NM_025736 | 4921531G14Rik,AV060620,AW209495                  | 3.59E-06 | -1.79439  |
| BC025074  | 4732497O03Rik,HCA66,MGC25509,RP23-253E9.3        | 0.00007  | -1.60501  |
| BC025830  | 4732466D17Rik,AI098026                           | 0.00003  | -4.26646  |
| AK014586  | 4632417N05Rik,AI117603                           | 7.74E-16 | -4.01911  |
| NM_027334 | 3300001H21Rik,Aam-B,2210414H16Rik                | 2.77E-22 | -8.13739  |
| BC028766  | 3300001G02Rik,AL033324,C16ORF33                  | 0.00006  | -1.56321  |
| BC005579  | 3230401D17Rik,AI256769,RP23-297J14.5             | 7.85E-12 | -1.5173   |
| BM234253  | 3110004L20Rik                                    | 0.00037  | -1.80139  |
| NM_133725 | 3110001I20Rik,AI504340,C630011I23                | 7.05E-09 | -1.72651  |
| BC021353  | 3110001A13Rik,AA589595,AA959793,AI132312         | 9.41E-10 | -1.80085  |
| BM210204  | 2900091E11Rik,5730495F03Rik                      | 0.00088  | -1.81553  |
| AV328280  | 2900019G14Rik,AI159670                           | 0.00085  | -2.84374  |
| BF134369  | 2810443J12Rik,AW060693                           | 1.56E-06 | -1.54375  |
| AV225967  | 2810439K08Rik,AW319712                           | 9.90E-15 | -1.9864   |
| BB029149  | 2810409H07Rik,PTD004,2510025G09Rik,2810405J23Rik | 0.00009  | -1.56887  |
| AI836168  | 2810405K02Rik,AI836168                           | 0        | -5.93355  |
| BC024599  | 2810003C17Rik,lba2,C87647,AI043124,MGC30545      | 0.00093  | -1.8728   |
| BC024599  | 2810003C17Rik,lba2,C87647,AI043124,MGC30545      | 0.00008  | -3.09102  |
| AK012178  | 2610528K11Rik,AI414895,2610200O14Rik             | 0.00043  | -1.60658  |
| AK012175  | 2610528J11Rik                                    | 0.00024  | -1.93714  |
| AK019979  | 2610528E23Rik,AV099812                           | 0.00062  | -1.58438  |
| AV008714  | 2610318K02Rik                                    | 1.75E-07 | -1.54162  |
| BF782285  | 2410016F19Rik,AU019813                           | 0.00055  | -2.15388  |
| AV017653  | 2400002F11Rik,MGC41042                           | 8.76E-09 | -1.8458   |
| AK010217  | 2310079G19Rik                                    | 0.00002  | -100      |
| NM_133739 | 2310075C12Rik,MGC102366                          | 4.46E-09 | -1.51643  |
| NM_133739 | 2310075C12Rik,MGC102366                          | 1.38E-07 | -1.54805  |
| NM_029667 | 2310069N01Rik                                    | 1.61E-14 | -8.13399  |
| AK009986  | 2310058N18Rik,Krt24,2310075C18Rik                | 0.00059  | -26.59272 |
| NM_027170 | 2310057N15Rik,Krtap13-1,MGC129405                | 0        | -100      |
| BC010826  | 2310056P07Rik                                    | 0.00003  | -1.8754   |
| NM_025621 | 2310050C09Rik                                    | 0        | -15.07845 |
| AK009800  | 2310044G17Rik,AI842544,AI853744,mKIAA1737        | 7.45E-21 | -3.00266  |
| NM_025966 | 2310039H08Rik                                    | 0.00001  | -1.57656  |
| NM_054100 | 2310034C09Rik                                    | 0        | -100      |
| BB001825  | 2310020A21Rik                                    | 0.00017  | -2.30535  |
| NM_019974 | 2310015I08Rik,TLSP,Prss20                        | 0.00014  | -1.87484  |
| AV232798  | 2310014L17Rik,C77118,AV237412                    | 7.08E-20 | -3.01712  |
| AK009207  | 2310007H09Rik                                    | 4.11E-12 | -8.67057  |
| AK009173  | 2310005G13Rik                                    | 0.00088  | -15.71411 |
| AV074000  | 2310002J15Rik,AV023762                           | 6.62E-20 | -3.56183  |
| AJ310638  | 2310001A20Rik,AI314817                           | 0.00096  | -1.67244  |

|           |                                                        |          |          |
|-----------|--------------------------------------------------------|----------|----------|
| AK009010  | 2300002G24Rik,AA589624                                 | 0        | -2.45561 |
| BC027185  | 2210023G05Rik                                          | 3.58E-23 | -6.39701 |
| BF225441  | 2210010L05Rik,AI836200,AW212394,9630025I22Rik          | 1.92E-08 | -1.72942 |
| AK008522  | 2010305C02Rik,RP23-384C18.8                            | 1.35E-10 | -2.26155 |
| AV069567  | 2010107H07Rik                                          | 0.00086  | -1.96666 |
| BC024943  | 2010107G23Rik,AA545165                                 | 0.0004   | -1.75135 |
| BG975168  | 1810063B05Rik,AI447995                                 | 8.14E-07 | -2.02647 |
| NM_025559 | 1810046J19Rik,AI463380                                 | 3.88E-06 | -1.69395 |
| BC002135  | 1810037I17Rik,MGC107621,5730414I01Rik                  | 2.14E-08 | -1.95082 |
| BQ126239  | 1810035L17Rik                                          | 0.00002  | -1.66992 |
| BC025528  | 1700108L22Rik,AA690246,FLJ10378,MGC38253               | 0.00002  | -2.06869 |
| NM_026091 | 1700037H04Rik                                          | 0.00013  | -3.81765 |
| BC013640  | 1500032D16Rik                                          | 1.36E-09 | -1.68439 |
| NM_033146 | 1500005A01Rik,Cgi112                                   | 1.40E-12 | -4.27221 |
| NM_028770 | 1200016G03Rik,2310041I20Rik                            | 0.00002  | -1.951   |
| AK004786  | 1200015F23Rik,AI131757                                 | 4.32E-15 | -2.21113 |
| BB366634  | 1200009B18Rik,Ptx1,AA408438,4930572C01Rik              | 0.00045  | -21.5882 |
| BB028104  | 1200003C05Rik,AI256468                                 | 0.0001   | -1.98896 |
| BB408123  | 1190002H23Rik                                          | 3.92E-06 | -2.38509 |
| BC019131  | 1110067D22Rik,A530071M23,RP23-455B19.1                 | 3.58E-15 | -1.73825 |
| NM_025413 | 1110058A15Rik,AI604448                                 | 5.78E-14 | -4.3504  |
| AV014636  | 1110055J05Rik                                          | 2.12E-14 | -4.30542 |
| AF365876  | 1110032A04Rik,ADMP                                     | 2.33E-07 | -8.06462 |
| BF681728  | 1110020P15Rik,AA960494,RP23-280J3.4                    | 0.00004  | -1.61157 |
| AK003812  | 1110019D14Rik                                          | 0.00016  | -2.82692 |
| BI452905  | 1110014F24Rik,Dmkn,SK30,SK89,cl-36,AW561900,C130074A08 | 8.28E-07 | -1.56695 |
| AV012400  | 1110012M11Rik,MGC99951                                 | 0.0006   | -1.57865 |
| AV012400  | 1110012M11Rik,MGC99951                                 | 0.00007  | -1.71588 |
| NM_028628 | 1110008K04Rik,AI415426                                 | 5.97E-29 | -8.39168 |
| AV012102  | 1110002M09Rik                                          | 3.57E-07 | -1.51628 |
| NM_134054 | 1110002B05Rik,AA407909,AA409588,AU041967               | 0.0001   | -1.59036 |
| AV006463  | 1100001G20Rik                                          | 1.40E-06 | -4.24721 |
| BC004797  | 0610040J01Rik,AI662686                                 | 4.56E-06 | -4.68881 |
| AI314055  | 0610039N19Rik,MMT-7,C80029,RetSat                      | 2.34E-06 | -1.59015 |
| AK002512  | 0610010O12Rik                                          | 3.78E-09 | -5.4348  |
| NM_025319 | 0610009B22Rik                                          | 0.00001  | -1.78659 |
| AK002320  | 0610008C08Rik,MGC130105,MGC130106,1110019O03Rik        | 0.00006  | -1.55269 |
| BE951033  | 0610007A15Rik,AA690150,AU015616,0610030G03Rik          | 3.30E-32 | -3.88397 |

**Supplementary Table 3** Genes up-and down-regulated in MB (>1.5 fold and P-value < 0.001)

| 1908 genes up-regulated in medulloblastoma (>1.5 fold and P-value < 0.001) |                                                              |          |             |
|----------------------------------------------------------------------------|--------------------------------------------------------------|----------|-------------|
| Accession #                                                                | Sequence Name(s)                                             | P-value  | Fold Change |
| BC013559                                                                   | Zwint,Zwint-1,D10Erttd749e,2010007E07Rik,2600001N01Rik       | 2.00E-07 | 2.75919     |
| BC027435                                                                   | Zwilch,2310031L18Rik                                         | 1.29E-09 | 4.23201     |
| BM228797                                                                   | Zranb3,AI316834,C730006D09,4933425L19Rik                     | 0.00069  | 3.38511     |
| BB233964                                                                   | Znrf3,Gm1167,AA591877,BC019575                               | 0.00061  | 2.32856     |
| BM221751                                                                   | Znrf2,AU044205,MGC129274,MGC129275,D6Erttd365e,1190002C14Rik | 1.52E-07 | 3.81148     |
| AI326272                                                                   | Zipro1,RU49,Zfp38,Zfp-38,CTfin51,AI326272                    | 2.03E-06 | 3.47323     |
| BB126810                                                                   | Zic4                                                         | 1.21E-06 | 2.9413      |
| U05343                                                                     | Zfp91,Pzf,AL024263,AW545902,9130014I08Rik,A530054C17Rik      | 3.63E-07 | 1.84863     |

|           |                                                              |          |          |
|-----------|--------------------------------------------------------------|----------|----------|
| BB008902  | Zfp9,Zfp-9,Krox-4,AU016736,mszf79-2,1810048F22Rik            | 0.00035  | 4.10548  |
| BB040500  | Zfp647,Es492,6030449J21                                      | 1.12E-07 | 2.75271  |
| BM237055  | Zfp637,BC021601,MGC54806                                     | 5.37E-14 | 2.0618   |
| AV274175  | Zfp608,MGC116601,4932417D18Rik                               | 4.75E-09 | 2.67679  |
| BB150458  | Zfp537,Tsh3,KIAA1474,mKIAA1474,A630038G13Rik                 | 3.06E-07 | 3.73439  |
| BB447914  | Zfp503,Nolz1,AI181838,B830002A16Rik                          | 0.00014  | 2.79364  |
| AW491540  | Zfp462,Gt4-2,6030417H05,9430078C22Rik                        | 2.87E-09 | 2.41736  |
| BI083675  | Zfp451,COASTER,AI596398,mKIAA1702,                           | 0.00007  | 1.66894  |
| BC018339  | Zfp422,KOX15,Krox25,Krox26,Krox-26,                          | 4.38E-16 | 2.84708  |
| BB022304  | Zfp41,Zfp-41,CTfin92                                         | 8.31E-06 | 3.95183  |
| BE629588  | Zfp367,ZFF29a,ZFF29b,8030486J21Rik                           | 3.55E-10 | 2.00904  |
| BB024472  | Zfp354c,AJ18,Kid3,Tcf17I2,                                   | 9.04E-07 | 1.7346   |
| BM114753  | Zfp318,TZF,2610034E08Rik,D530032D06Rik                       | 0.0006   | 2.25319  |
| BQ176535  | Zfp277,NIRF4,2410017E24Rik                                   | 0.00055  | 2.51773  |
| AW556161  | Zfp218,Tsh2,Mtsh2,KIAA4248,Sdcccag33l,mKIAA4248,B830045G17   | 4.08E-20 | 22.86353 |
| AW987152  | Zfp217,Gm562,ZABC1,Znf217,AW987152,4933431C08Rik             | 3.16E-06 | 4.37163  |
| BB633247  | Zfp207,Zep,8430401D15Rik                                     | 4.11E-10 | 2.41981  |
| AK017929  | Zfp198,FIM,MYM,RAMP,SCLL,MGC51607,5830413P05Rik              | 0.00019  | 1.54904  |
| NM_015753 | Zfhx1b,SIP1,Zfx1b,Zfxh1b,mKIAA0569,9130203F04Rik             | 1.92E-07 | 3.02062  |
| BB389299  | Zfhx1a,BZP,ZEB,MEB1,Nil2,Tcf8,AREB6,Tcf18,Zfhep,Zfx1a,Zfx1ha | 2.59E-08 | 2.84435  |
| BQ176228  | Zdhhc15,6030457O13Rik                                        | 6.19E-07 | 3.19404  |
| AI267092  | Zbtb5,AI646847,KIAA0354,mKIAA0354,5930421110,9430083K24Rik   | 0.00023  | 1.51175  |
| BB175650  | Zbtb20,HOF,DPZF,Oda8,ODA-8S,Zfp288,                          | 3.03E-09 | 2.89703  |
| BB045268  | Zbtb12,G10,Bat9,NG35,Bat-9,BC020447                          | 6.83E-07 | 4.50771  |
| BC012239  | Zbtb1,Bsg2,9430077A12,C430003J21Rik                          | 9.79E-07 | 2.16715  |
| BI665246  | Yy1,NF-E1,AW488674                                           | 0.00018  | 1.69507  |
| BF714941  | Ywhae,AU019196                                               | 0.0001   | 1.7809   |
| BB455932  | Ythdf2,HGRG8,NY-REN-2,9430020E02Rik                          | 1.60E-23 | 1.99938  |
| NM_023249 | Ypel1,Dgl1,Ppil2,mdgl-1,                                     | 6.42E-31 | 9.30561  |
| BC011117  | Yif1a,54TM,Yif1,Yif1p,5330422J23Rik                          | 0.00047  | 1.62088  |
| AK010522  | Yeats4,GAS41,NuBI-1,4930573H17Rik,B230215M10Rik              | 6.63E-14 | 1.96345  |
| BC013620  | Ybx1,MSY1,Nsep1,C79409,mYB-1a,MGC118070,1700102N10Rik        | 1.02E-37 | 3.53037  |
| C88269    | Xrn2                                                         | 0.00003  | 1.64261  |
| NM_010247 | Xrcc6,Ku70,70kDa,G22p1                                       | 0.00058  | 1.50879  |
| NM_009532 | Xrcc1,Xrcc-1,MGC102556                                       | 0.00014  | 4.20933  |
| BC025628  | Xpo1,Crm1,AA420417                                           | 3.69E-06 | 2.17367  |
| NM_133216 | Xpnpep1,D230045I08Rik                                        | 0.00011  | 1.59516  |
| NM_013753 | X99384,PaId,MMPAL,mKIAA1274                                  | 1.65E-15 | 5.8646   |
| NM_025275 | X83328,Amz2,ESTM12                                           | 2.63E-06 | 1.55262  |
| BG065719  | X83313,ESTM4                                                 | 3.53E-10 | 6.55876  |
| BE136550  | Wtip                                                         | 0.00013  | 2.95804  |
| AV141160  | Wtap,2810408K05Rik,9430038B09Rik                             | 2.54E-15 | 2.18141  |
| BM247333  | Wnk1,Prkwnk1,mKIAA0344,6430573H23Rik                         | 0.00003  | 4.53567  |
| BB280432  | Wiz                                                          | 0.0007   | 3.08856  |
| BB441606  | Whsc1,Whsc1l,                                                | 5.67E-21 | 13.82269 |
| BB376471  | Wee1                                                         | 1.15E-06 | 3.73239  |
| BB041662  | Wdr76,AA517836,6030457D09,5830411K18Rik                      | 1.34E-06 | 2.76017  |
| NM_031392 | Wdr6                                                         | 0.00027  | 1.93555  |
| AW554543  | Wdr58,MGC107304,MGC109691,F830014G06Rik                      | 0.00003  | 3.68068  |
| AK002371  | Wdr57,Prp8bp,0610009C03Rik                                   | 7.53E-14 | 3.15291  |
| AK005105  | Wdr53,AI848860,1500002B03Rik                                 | 0.00024  | 3.30841  |

|           |                                                             |          |          |
|-----------|-------------------------------------------------------------|----------|----------|
| BG066921  | Wdr50,6430513M13,6230425C22Rik                              | 0.00028  | 1.90377  |
| BB753423  | Wdr5,Big,Big-3,AA408785,AA960360,2410008O07Rik              | 6.65E-06 | 2.72326  |
| C78559    | Wdr46,Bing4,C78447,C78559,2310007I04Rik                     | 0.00032  | 2.15215  |
| AK012043  | Wdr43,Wrd43,AU020887,AV024208,mKIAA0007,2610318G08Rik       | 0.00005  | 2.24041  |
| BG063575  | Wdr3,AW546279,D030020G18Rik                                 | 3.43E-06 | 2.18522  |
| C77437    | Wdhd1,AND-1,A630092E18,D630024B06Rik                        | 2.62E-09 | 4.68887  |
| BC007478  | Wbp5,AL024233                                               | 3.40E-07 | 1.57541  |
| NM_016757 | Wbp1,AI255152                                               | 0.00002  | 2.6194   |
| BC016676  | Vrk1,51PK                                                   | 0.00055  | 2.69567  |
| AK003237  | Vkorc1,D7Wsu86e                                             | 1.08E-07 | 2.41499  |
| M24849    | Vim,MGC102095                                               | 7.41E-08 | 1.70934  |
| BM119387  | Vil2,p81,ezrin,R75297,AW146364,MGC107499,cytovillin         | 3.67E-18 | 5.57339  |
| AV308858  | Vezf1,db1,AI848691,AW046909                                 | 0.00002  | 1.63295  |
| BB250384  | Vcam1,CD106,Vcam-1                                          | 4.66E-08 | 2.75309  |
| BF535947  | Vav2,AI847175,2810040F13Rik                                 | 2.70E-07 | 5.81105  |
| BF225689  | Utp14a,JsdX,KIAA0266,NY-CO-16,SDCCAG16                      | 2.97E-09 | 2.22656  |
| BC026983  | Usp39,SAD1,CGI-21,AA408960,AI894154,D6Wsu157e               | 5.00E-06 | 2.54347  |
| BG072011  | Usp37,4932415L06Rik,C330008N13Rik                           | 7.11E-07 | 3.05185  |
| BC018179  | Usp1,MGC25559                                               | 2.51E-07 | 3.78207  |
| BC004037  | Ung,UNG1,UNG2                                               | 3.52E-06 | 5.49763  |
| BQ266387  | Uhrf2,Nirf,AI426270,AW214556,2310065A22Rik,D130071B19Rik    | 0.00054  | 2.03666  |
| BB702754  | Uhrf1,Np95,ICBP90,RNF106,AL022808                           | 5.02E-29 | 24.50998 |
| BM211361  | Ugcgl1,AA589501,AI414429,AI448372                           | 9.91E-09 | 2.57295  |
| NM_030724 | Uck2,UK,UMK,Umpk,TSA903                                     | 0.00024  | 4.8805   |
| AB033370  | Uchl3                                                       | 7.63E-10 | 2.78057  |
| NM_019748 | Uble1a,AOS1,SAE1,Sua1,HSPC140                               | 2.26E-09 | 2.79725  |
| NM_026024 | Ube2t,C80607,2700084L22Rik                                  | 3.57E-07 | 7.32909  |
| NM_133777 | Ube2s,E2-EPF,AA409170,MGC101982,0910001J09Rik,6720465F12Rik | 3.88E-26 | 3.44511  |
| BM242612  | Ube2i,UBC9,Ubce9,Mmubc9,Ubce2i,5830467E05Rik                | 8.52E-20 | 3.51911  |
| AV162459  | Ube2c,D2Ert695e,1110015A16Rik                               | 6.69E-15 | 30.03257 |
| BF466442  | Uaca,nuc1ing,2700059D02Rik                                  | 0.0007   | 3.18717  |
| NM_011662 | Tyrobp,Ly83,DAP12,KARAP                                     | 1.70E-15 | 7.08579  |
| BC020139  | Tyms,TS                                                     | 1.51E-09 | 8.04182  |
| BB284199  | Txnrd1,TR,TR1,Tgr,TrxR1                                     | 0.00004  | 3.02378  |
| AK004219  | Txn15,TRP14,D11Ert672e,4831443O22Rik,RP23-207N15.4          | 0.00017  | 2.27425  |
| BB030680  | Txn12,PICOT                                                 | 0.00025  | 2.05174  |
| AF173681  | Txnip,THIF,VDUP1,mVDUP1,Hyplip1,AA682105,1200008J08Rik      | 0.00032  | 2.65447  |
| NM_011660 | Txn1,ADF,Txn,AW550880                                       | 1.22E-22 | 2.26209  |
| BB387906  | Tubgcp2,1700022B05Rik                                       | 0.00074  | 1.73365  |
| NM_026473 | Tubb6,BB220206,2310057H16Rik                                | 1.18E-08 | 5.05353  |
| NM_011655 | Tubb5,AA408537,AI596182,M(beta)5,B130022C14Rik              | 0        | 3.89855  |
| NM_023279 | Tubb3,M(beta)3,M(beta)6,3200002H15Rik                       | 1.03E-15 | 3.10995  |
| AA986082  | Tubb2b,2410129E14Rik                                        | 3.92E-13 | 2.10902  |
| NM_009448 | Tuba6,M[a]6                                                 | 0.00012  | 2.84445  |
| NM_009446 | Tuba3,M[a]3,AI528779,MGC107295                              | 2.62E-06 | 2.44863  |
| BQ180649  | Ttyh3,AI414930,2900029G13Rik                                | 0.0007   | 1.99116  |
| AV231607  | Ttl4,AI451681,mKIAA0173,4632407P03Rik                       | 2.44E-06 | 2.54253  |
| NM_009445 | Ttk,PYT,esk,Esk1,AL022661                                   | 3.07E-10 | 10.48344 |
| BB283807  | Ttf2,AV218430,8030447N19,4632434F22Rik                      | 2.74E-24 | 7.02284  |
| BC017545  | Ttc13,BC017545,MGC28881,MGC105232                           | 0.00004  | 1.52314  |
| NM_019656 | Tspan6,T245,Tm4sf,Tm4sf6,TSPAN-6,AI316786                   | 1.29E-21 | 5.09594  |



|           |                                                        |          |          |
|-----------|--------------------------------------------------------|----------|----------|
| NM_025982 | Tspan31,Sas,AW742554,2700085A14Rik                     | 0.00001  | 2.25926  |
| BB818311  | Tsn,TB-RBP,AU040286,2610034C24Rik                      | 5.75E-06 | 1.87705  |
| BB276676  | Tsen2,AU067695,MGC69703                                | 0.00026  | 1.99714  |
| AV118079  | Tsc22d1,TSC,Egr5,TSC-22,Tgfb1i4,AA589566,AW105905      | 0.00018  | 2.84     |
| BG064045  | Trub2,G430055L02Rik                                    | 1.67E-10 | 2.53015  |
| AK003534  | Trspap1,Secp43,1110007F05Rik                           | 0.00087  | 2.44971  |
| AW324327  | Trpc2,trp2,Trp2,mTrp2,TRPC2a,TRPC2b,smTRPC2            | 2.12E-10 | 3.93363  |
| AW495711  | Trp53inp1,SIP,Teap,SIP18,SIP27,Stinp,2700057G22Rik     | 5.78E-10 | 3.20362  |
| BQ175031  | Trp53i11,Tp53i11                                       | 7.96E-13 | 5.19949  |
| BB489500  | Troap,tastin,AW476063,E130301L11Rik                    | 1.69E-07 | 8.45291  |
| AK010336  | Trip13,D13Erd328e,2410002G23Rik                        | 1.06E-28 | 7.35423  |
| BB204151  | Trim59,Mrf1,TSBF1,2310035M22Rik,2700022F13Rik          | 3.43E-06 | 6.10362  |
| BQ175280  | Trim35,NC8,HLS5,Mair,                                  | 2.89E-18 | 1.80418  |
| BB290427  | Trim27,Rfp,AW538890                                    | 0.00033  | 3.71641  |
| BB611004  | Trim24,TIF1,Tif1a,AI447469,A130082H20Rik,D430004I05Rik | 1.42E-09 | 3.89525  |
| BB354684  | Trib2,TRB-2,AW319517                                   | 0.00065  | 1.5736   |
| BE628649  | Trappc1,BET5,MUM2,D11Erd172e                           | 0.00086  | 1.65352  |
| BC012401  | Tram1,TRAMP,MGC1174,1810049E02Rik                      | 0.00047  | 1.50174  |
| NM_009423 | Traf4,CART1,A530032M13Rik                              | 7.11E-07 | 5.03138  |
| BF472685  | Traf3ip2,Act1,AI429613                                 | 0.00038  | 1.84133  |
| AK011311  | Tpx2,DIL2,p100,REPP86,2610005B21Rik                    | 2.80E-45 | 15.57606 |
| NM_013837 | Tpst1,R75054                                           | 0.00001  | 1.70976  |
| BE380713  | Tpm3,Tpm5,Tm5NM,Tpm-5,hTMnm,Trop-5,                    | 0.00008  | 2.68855  |
| NM_011626 | Tparl,pFT27,Tpardl,AV026557                            | 9.92E-07 | 1.78204  |
| BC007170  | Topbp1,AI256758,mKIAA0259,2810429C13Rik,D430026L04Rik  | 5.65E-17 | 4.04116  |
| BM211413  | Top2a,Top-2                                            | 3.37E-21 | 22.72587 |
| BG797387  | Top1,Top-1,AI467334,D130064I21Rik                      | 9.84E-06 | 2.06227  |
| AK002902  | Tomm20,MAS20,MOM19,                                    | 8.56E-07 | 1.55191  |
| BM119957  | Tnrc9,CAGF9,BC052044,C230068E13                        | 1.01E-21 | 20.66672 |
| AV306751  | Tnpo3,C81142,Trn-SR                                    | 1.74E-07 | 3.21     |
| BM236809  | Tnpo1,MIP,TRN,IPO2,MIP1,Kpnb2,AU021749,D13Erd688e      | 1.17E-07 | 6.7096   |
| BB339554  | Tnks2,AA517131,AI662480,5430432P15Rik                  | 0.00024  | 1.54286  |
| L26349    | Tnfrs1a,FPF,p55,TNF-R,TNFAR,Tnfr1                      | 0.00021  | 2.16806  |
| NM_134131 | Tnfaip8,Nded,Gg2-1,Scs-2,AA987150,E130304C20Rik        | 1.70E-11 | 2.88505  |
| BB233088  | Tnfaip2,Tnfp2,tnfb94                                   | 0.00063  | 2.62846  |
| BB096368  | Tmsb10,TB10,Ptmb10                                     | 0        | 7.32481  |
| AK017463  | Tmpo,TP,LAP2                                           | 2.10E-19 | 9.65725  |
| AK017725  | Tmod3,UTMOD,U-Tmod                                     | 0.00047  | 1.98769  |
| BG064731  | Tmem48,NDC1,AI450313,2810475A17Rik                     | 1.98E-06 | 3.30409  |
| BC024118  | Tmem46,9430059P22Rik                                   | 1.90E-12 | 7.56042  |
| NM_019953 | Tmem4,Zsig9,AW229003,D10Bwg1546e,5330432A10Rik         | 9.23E-06 | 2.34846  |
| BB262218  | Tmem32,BC032271,MGC40705,9630048L06Rik                 | 3.35E-08 | 1.82071  |
| BC019745  | Tmem2,MGC102198,mKIAA1412,3110012M15Rik                | 0.00042  | 1.55963  |
| BG074632  | Tmem16f,AA407480,AW554778,2900059G15Rik,F730003B03Rik  | 4.44E-08 | 3.99195  |
| BM114154  | Tmeff1,Tr1,M7365,A830033E11                            | 2.20E-20 | 4.58783  |
| BQ177170  | Tm4sf1,L6,M3s1                                         | 2.96E-06 | 3.52098  |
| BB156385  | Tlk1,4930545J15Rik                                     | 0.00018  | 2.55257  |
| NM_011599 | Tle1,Grg1,C230057C06Rik                                | 3.06E-30 | 10.27658 |
| NM_009387 | Tk1,Tk-1,Tk1a,Tk1b,D530002A18Rik                       | 8.37E-09 | 20.17816 |
| AK011357  | Tipin,1110005A05Rik,1110018P21Rik                      | 2.55E-08 | 3.77627  |
| M93954    | Timp2,Timp-2,D11Bwg1104e                               | 1.71E-17 | 3.47255  |

|           |                                                        |          |          |
|-----------|--------------------------------------------------------|----------|----------|
| BM230269  | Timeless,tim,C77407,Debt69                             | 2.38E-10 | 10.57842 |
| AK009502  | Tia1,mTIA-1,AI256674,2310050N03Rik                     | 0.00003  | 3.50251  |
| NM_027212 | Thrap6,TRAP25,1810038N03Rik,2510044J04Rik              | 0.00061  | 1.66301  |
| NM_011568 | Thoc4,ALY,REF1,Refbp1                                  | 8.05E-18 | 2.78757  |
| BF320755  | Thex1,3'hexo,3110010F15Rik                             | 2.31E-20 | 2.76199  |
| AW556273  | Tgif2,C80753,C81206,4921501K24,5730599O09Rik           | 4.14E-07 | 8.42293  |
| NM_009372 | Tgif,AA959811,AI462167                                 | 2.29E-26 | 7.85246  |
| BM248342  | Tgfr1,ALK5,Alk-5,TbetaRI,AU017191,TbetaR-I             | 0.00019  | 2.0197   |
| BB532080  | Tgfb1,68kDa,big-h3,Beta-ig,AI181842,AI747162           | 0.00042  | 2.00898  |
| BF144658  | Tgfb2,Tgfb-2,BB105277,Tgf-beta2                        | 2.75E-08 | 2.70455  |
| BG075396  | Tfdp1,Dp1,Drtf1                                        | 1.38E-18 | 3.20279  |
| BB428851  | Tex9,tsec-1                                            | 0.00013  | 4.76837  |
| NM_031386 | Tex14,C85585                                           | 8.54E-10 | 7.19838  |
| BG075406  | Tex10,BC006867,MGC11792,2610206N19Rik,2810462N03Rik    | 1.23E-06 | 2.94542  |
| NM_019643 | Tera                                                   | 4.50E-19 | 6.48266  |
| D50563    | Tead2,ETF,Etdf,TEF4,TEF-4,TEAD-2                       | 0.00001  | 11.69653 |
| BG071163  | Tead1,TEF-1,Tcf13,TEAD-1,mTEF-1,Gtrgeo5                | 1.83E-07 | 3.44645  |
| NM_011561 | Tdg,Jza1,JZA-3,E130317C12Rik                           | 3.51E-08 | 2.58134  |
| NM_013686 | Tcp1,CCT,p63,Cct1,Ccta,TRic,Tp63,Tcp-1,c-cpn,AI528772  | 3.07E-12 | 1.64384  |
| AF352579  | Tcfe2a,                                                | 3.45E-06 | 7.43276  |
| AI639846  | Tcf4,                                                  | 0.00071  | 1.65569  |
| BC004617  | Tcf19,AW495861,5730403J10Rik                           | 1.43E-24 | 10.21842 |
| AW046403  | Tcerg1,p144,Taf2s                                      | 0.00007  | 1.50076  |
| BB139935  | Tbrg4,Cpr2,TB-12,                                      | 0.0007   | 2.42508  |
| NM_009321 | Tbca                                                   | 5.20E-07 | 1.57465  |
| BI218684  | Tbc1d16,Tcd1d16,BC026530,B930087K01                    | 1.64E-11 | 3.63702  |
| BC008166  | Tax1bp3,TIP-1,1300011C24Rik,RP23-263M10.10             | 6.74E-08 | 10.96911 |
| AK010256  | Tars,ThrRS,D15Wsu59e                                   | 1.46E-07 | 1.76705  |
| BC012873  | Tardbp,C85084,1190002A23Rik                            | 8.53E-13 | 2.57571  |
| AV117817  | Taf5,AV117817,6330528C20Rik                            | 4.48E-10 | 2.82655  |
| BB427389  | Taf15,68kDa,Taf2n,TAFlI68,2610111C21Rik                | 1.39E-08 | 1.70764  |
| NM_020024 | Taf10,30kDa,Taf2h,TAFlI30,AU041226                     | 6.84E-07 | 2.06092  |
| BB440612  | Tada2,AV319371,D030022J10Rik                           | 6.63E-06 | 2.27929  |
| BB787809  | Tacc3,Aint,C86661                                      | 5.02E-14 | 10.52078 |
| BF582734  | Syne2,NUA                                              | 8.74E-06 | 2.16369  |
| BB469322  | Syncrip,pp68,Nsap1,Nsap1l,GRY-RBP,                     | 4.83E-11 | 3.06244  |
| AK005954  | Syce2,Cesc1,AA407907,1700013H19Rik                     | 0.0007   | 2.13618  |
| BB296443  | Suv39h2,AA536750,D2Erd544e,4930507K23Rik,D030054H19Rik | 0.00003  | 5.01795  |
| AF193862  | Suv39h1,mIS6,AI852103,AL022883,DXHXS7466e              | 0.00002  | 1.95603  |
| AW536705  | Supt16h,Cdc68,Spt16,Fact140                            | 0.00002  | 1.58744  |
| BG064647  | Sumo2,Smt3b,SUMO-2,Smt3h2                              | 1.25E-10 | 3.32105  |
| AU020235  | Sulf2,AU020235,mKIAA1247,2010004N24Rik                 | 6.27E-07 | 10.02412 |
| AJ308624  | Sufu,Su(fu),2810026F04Rik                              | 0.00018  | 4.04219  |
| BB757840  | Suclg2,AF171077,AW556404,MGC91183,D6Wsu120e            | 0.00005  | 1.80994  |
| BM218509  | Stxbp6,BC024598,MGC30948                               | 4.49E-23 | 3.51684  |
| AW555412  | Stx6,AI415714,AI845861,2310039E05Rik,2410005I16Rik     | 5.75E-06 | 4.82742  |
| AV339210  | Stx1a,HPC-1                                            | 0.00001  | 4.0563   |
| AW557906  | Strap,Unrip,C78091,C79202,AW557906                     | 1.16E-07 | 1.92956  |
| BC010581  | Stmn1,19K,Lag,SMN,                                     | 0.00025  | 1.93722  |
| BG069810  | Stk4,Mst1,Ysk3,Kas-2,AI447339,AU020804                 | 0.00011  | 1.83782  |
| AI661948  | Stk17b,Drak2,AI120141,3110009A03Rik                    | 0.00005  | 3.21526  |

|           |                                                                |          |          |
|-----------|----------------------------------------------------------------|----------|----------|
| BC004585  | Stil,Sil                                                       | 0.00001  | 3.38136  |
| AV337522  | Stag1,SA-1,AU045003                                            | 0.00004  | 1.85236  |
| BG075800  | St6gal1,Cd75,Siat1,ST6Gal,AW742324,ST6Gal I,St6Gal-I,MGC116663 | 1.27E-07 | 2.77198  |
| NM_133726 | St13,HIP,HOP,                                                  | 0.00095  | 1.50875  |
| NM_009217 | Sstr2,sst2,SSTR-2,Smstr2,Smstr-2                               | 5.04E-20 | 21.68512 |
| BC024835  | Ssrp1,T160,Hmgox,C81323,Hmg1-rs1,Hmgi-rs3                      | 7.83E-18 | 2.73152  |
| BC011111  | Ssr3,TRAPG,AL022999,AU022074,AW553833,0610038P07Rik            | 3.73E-06 | 2.20364  |
| BG077348  | Ssr1,SSR,TRAPA,AI159733,AI452176,6330400D04,2510001K09Rik      | 0.00001  | 2.54394  |
| BG073014  | Ssbp1,MtSSB,mtDBP,2810480P10Rik,G630031O20Rik                  | 0.00003  | 2.03336  |
| AI528781  | Ss18,Syt,Ssxt,D130059H17                                       | 2.76E-06 | 3.21792  |
| BQ176926  | Srp1,AU017960                                                  | 8.05E-07 | 1.57524  |
| AI326423  | Srebf1,ADD-1,SREBP1,SREBP-1,SREBP-1a,SREBP-1c,D630008H06       | 1.43E-09 | 8.88389  |
| NM_009270 | Sqle,AI323792                                                  | 0.00031  | 1.5385   |
| BB095517  | Spg21,MAST,ACP33,GL010,BM-019,C78576,D9Wsu18e                  | 7.24E-08 | 5.45511  |
| BC027121  | Spbc25,2600017H08Rik,2610205L13Rik                             | 5.82E-30 | 27.63305 |
| BF577722  | Spbc24,AV109292,2410030K01Rik                                  | 2.88E-13 | 19.9598  |
| AV271736  | Spata13,C79050,ESTM11,X83327,FLJ00298,mFLJ00298                | 0.00025  | 7.48605  |
| AV298495  | Spast,Spg4,mKIAA1083                                           | 0.00016  | 1.57168  |
| BM208112  | Spag5,S17,MAP126,Deepest,Mastrin,AI874642,D11Bhm180e           | 0.00003  | 1.93809  |
| BB795189  | Sp1,Sp1-1,AA450830,AI845540,1110003E12Rik                      | 3.71E-12 | 1.87822  |
| BB462504  | Sox5,AI528773,MGC124352                                        | 7.11E-07 | 6.98768  |
| AI428101  | Sox4,Sox-4,AA682046                                            | 1.48E-12 | 7.82805  |
| NM_009236 | Sox18,Ra,Ragl,AI385749                                         | 8.75E-17 | 33.70179 |
| BM508495  | Sox11,end1,AI836553,1110038H03Rik,6230403H02Rik                | 4.33E-16 | 9.78637  |
| BB331017  | Sox1,Sox-1                                                     | 3.56E-06 | 3.26558  |
| NM_030889 | Sorcs2,N28137,mKIAA1329                                        | 0.00033  | 2.03456  |
| NM_021790 | Solt,Solzt,B130045K24Rik,C530004N04Rik                         | 9.03E-25 | 10.7865  |
| BB241535  | Socs3,CIS3,Cish3,EF-10,SSI-3,SOCS-3                            | 3.70E-07 | 9.38477  |
| BB244736  | Socs2,hg,JAB,CIS2,Cish2,SSI-2,SOCS-2,                          | 0.00021  | 1.96024  |
| AK011015  | Snx7,MGC107328,2510028H01Rik                                   | 3.29E-05 | 2.11182  |
| NM_026506 | Snrpg,SMG,2810024K17Rik                                        | 0        | 6.08527  |
| BI080799  | Snrpf,SMF,2010013O18Rik                                        | 1.34E-10 | 3.65876  |
| BC008262  | Snrpe,SME,C76690,AL022645                                      | 3.93E-07 | 2.3023   |
| NM_026095 | Snrpd3,SMD3,AW046420,1700043E15Rik,2310009E13Rik               | 2.90E-07 | 1.75776  |
| BQ043840  | Snrpd2,SMD2,MGC62953,1810009A06Rik                             | 7.14E-18 | 2.1785   |
| NM_009226 | Snrpd1,SMD1,AA407109,AL023031                                  | 1.23E-12 | 2.28202  |
| AW537796  | Snrpb2,2810052G09Rik                                           | 1.69E-09 | 2.48544  |
| NM_009225 | Snrpb,SMB,SM-B,SM11,SNRNP-B,AU018828                           | 1.52E-09 | 2.86436  |
| AU018828  | Snrpb,SMB,SM-B,SM11,SNRNP-B,AU018828                           | 0.00001  | 2.52616  |
| BC013777  | Snrpa1,MGC6298,MGC25531,U2snRNP-A',1500015N06Rik               | 4.04E-06 | 1.84378  |
| BC002169  | Snrp70,                                                        | 0.00054  | 1.72562  |
| NM_011432 | Snrp1c,U1-C                                                    | 4.38E-09 | 2.09619  |
| AK017012  | Sncaip,SYPH1,BB104594,MGC107459                                | 2.59E-08 | 4.77932  |
| NM_009214 | Sms,Gy,gyro,AI427066                                           | 1.33E-18 | 2.39623  |
| NM_009213 | Smpd2,nSMase,nSMase1,AW108287                                  | 5.18E-08 | 15.44913 |
| NM_022316 | Smoc1,SRG,AI848508,2600002F22Rik                               | 2.37E-36 | 12.76666 |
| AW555326  | Smo,bnb,Smoh,D13Mgi8,E130215L21Rik                             | 2.98E-07 | 3.88243  |
| AK016419  | Smchd1,AW554188,mKIAA0650,4931400A14Rik                        | 2.68E-06 | 1.79116  |
| AV281575  | Smc6l1,SMC6,                                                   | 0.00006  | 1.54939  |
| AV172948  | Smc4l1,C79747,2500002A22Rik                                    | 1.70E-28 | 7.43073  |
| BI684556  | Smc2l1,CAPE,CAP-E,Fin16,AI255214,AW545314,5730502P04Rik        | 7.28E-40 | 24.03249 |

|           |                                                               |          |          |
|-----------|---------------------------------------------------------------|----------|----------|
| AK018493  | Smarce1,Baf27,2810417B20Rik,5830412H02Rik,9030408N19Rik       | 2.44E-18 | 3.45362  |
| BI558117  | Smarcc1,Rsc8,SRG3,BAF155,AI115498                             | 5.05E-07 | 4.75014  |
| BB531653  | Smarcad1,Etl1,D6Pas1,AV081750,AW226546,mKIAA1122              | 0.00002  | 3.35504  |
| BI661719  | Smarca5,Snf2h,4933427E24Rik,D330027N15Rik                     | 0.00022  | 2.02402  |
| AV014063  | Smad5,Dwf-C,Madh5,MusMLP,AI451355,1110051M15Rik               | 3.12E-06 | 1.84896  |
| AK004804  | Smad4,DPC4,Madh4,D18Wsu70e                                    | 0.0005   | 1.81727  |
| NM_010754 | Smad2,Madh2,Madr2                                             | 0.00056  | 1.62106  |
| BB782729  | Slitrk5,2610019D03Rik                                         | 1.62E-11 | 3.08738  |
| BB547620  | Slc7a6,LAT3,LAT-2,AI643885                                    | 0.00008  | 2.25984  |
| BB264620  | Slc7a1,Atrc1,Rec-1,Rev-1,Atrc-1,mCAT-1,AI447493,4831426K01Rik | 2.32E-09 | 3.36079  |
| BM237826  | Slc4a7,NBC3,NBCn1,C330023F04,E430014N10Rik                    | 0.00085  | 2.10749  |
| BB145101  | Slc44a2,1110028E10Rik                                         | 1.89E-06 | 2.20725  |
| BB378464  | Slc43a1,PB39,Pov1,R00504,AA986141,2610016F07Rik               | 2.85E-06 | 2.88127  |
| BB825002  | Slc39a6,Ermelin                                               | 0.00002  | 2.43846  |
| AK012071  | Slc37a3,AU044904,MGC106297,2610507O21Rik                      | 0.00002  | 1.98934  |
| NM_016752 | Slc35b1,Ugalt2                                                | 0.00001  | 1.74146  |
| AF305501  | Slc29a1,ENT1,AA407560,1200014D21Rik                           | 1.46E-27 | 8.24631  |
| BB277461  | Slc1a4,SATT,ASCT1,AW045657                                    | 0.00026  | 4.4446   |
| NM_080853 | Slc17a6,DNPI,VGLUT2,2900073D12Rik                             | 6.89E-08 | 2.94128  |
| NM_009193 | Slbp                                                          | 8.17E-14 | 2.43277  |
| AV259620  | Skp2,FBXL1,MGC102075,MGC116668                                | 0.00001  | 7.72488  |
| NM_013929 | Siva,CD27bp                                                   | 7.99E-10 | 11.49973 |
| AF038848  | Sin3b,2810430C10Rik                                           | 0.00005  | 3.36256  |
| NM_011378 | Sin3a,Sin3,mSin3A,AW553200,KIAA4126,mKIAA4126                 | 4.55E-06 | 2.46588  |
| AF237702  | Shmt1,Shmt,mshmt,C81125,mshmt1,mshmt2,AI324848,AI385541       | 5.09E-27 | 12.05159 |
| NM_009169 | Shfm1,DSS1,Shfg,Shfdg1                                        | 4.45E-27 | 2.46585  |
| NM_011369 | Shcbp1,mPAL                                                   | 3.94E-29 | 22.23286 |
| AK007283  | Sh3kbp1,Ruk,Seta                                              | 0.00046  | 2.61474  |
| BB221842  | Sh3glb1,Bif-1,                                                | 0.00018  | 1.54431  |
| AK012114  | Sh3gl3,EEN-B2,SH3P13,Sh3d2c,Sh3d2c2,MGC118269                 | 0.0001   | 3.83363  |
| BM218317  | Sh3bgrl,1190008F14Rik                                         | 6.87E-13 | 8.24933  |
| NM_009163 | Sgpl1,Spl,AI428538,D10Xrf456                                  | 0.00008  | 3.14702  |
| AV316937  | Sgol2,Tripin,                                                 | 2.40E-15 | 15.98528 |
| BB410537  | Sgol1,Sgo1,C81037,MGC113769,3300001M08Rik                     | 4.19E-09 | 15.36183 |
| BG066686  | Sfxn2,C79732,F630107H02Rik                                    | 0.0002   | 2.34874  |
| NM_025573 | Sfrs9,25kDa,SRp30c,2610029M16Rik                              | 0.00003  | 2.4411   |
| BC027391  | Sfrs7,9G8,35kDa,NX-96,MGC38287,9430065L19Rik                  | 3.90E-12 | 2.16268  |
| BB054483  | Sfrs6,AI314910,AW146126,1210001E11Rik                         | 5.29E-13 | 2.01388  |
| NM_013663 | Sfrs3,X16,AL024116                                            | 9.30E-06 | 1.61343  |
| AK011528  | Sfrs2,SC35,MRF-1,Pr264,Sfrs10,D11Wsu175e                      | 9.26E-35 | 3.86116  |
| AV012790  | Sfrs12,SRrp86,SRrp508,AI450757,AI462342,8430401B01            | 0.00007  | 2.23906  |
| BG229318  | Sfrs10,TRA2B,SIG-41,Silg41,TRA2beta                           | 2.15E-10 | 1.7886   |
| BF682801  | Sfrs1,AI482334,AW491331,                                      | 1.60E-09 | 2.90442  |
| AY034062  | Sfpq,PSF,MGC101933                                            | 5.23E-06 | 2.53398  |
| BC006603  | Sf3b5,10kDa,Sf3b10,AU043053,1110005L13Rik                     | 0.00004  | 1.68612  |
| NM_133953 | Sf3b3,RSE1,SAP130,                                            | 0.00001  | 2.05493  |
| AK015776  | Sf3a3,60kDa,MGC103282,4930512K19Rik                           | 0.00066  | 1.75166  |
| BM229104  | Set,AA407739,StF-IT-1,                                        | 1.48E-11 | 2.23356  |
| BQ174721  | Sertad4,4833404A09,C130018M11Rik                              | 9.95E-30 | 4.36759  |
| NM_009252 | Serpina3n,Spi2-2,Spi2.2,Spi2/eb.4                             | 0.00002  | 10.25114 |
| NM_011353 | Serf1,4F5,m4F5,Msmac1                                         | 1.22E-07 | 6.00497  |

|           |                                                      |          |          |
|-----------|------------------------------------------------------|----------|----------|
| AV382262  | Serbp1,Pairbp1,AL022786,1200009K13Rik,9330147J08Rik  | 0.00009  | 1.88368  |
| NM_017380 | Sept9,Msf,MSF1,Sint1,PNUTL4                          | 0.00002  | 6.78949  |
| BB756379  | Sept8,Sepl,AW046166,mKIAA0202                        | 3.65E-08 | 1.62113  |
| BM120495  | Sept11,AW548875,D5Erd606e,6230410I01Rik              | 1.12E-21 | 2.14806  |
| BB293127  | Sephs1,SPS,SELD,SPS1,                                | 5.12E-08 | 5.58742  |
| BC023129  | Senp1,MGC27975,                                      | 0.00009  | 1.84936  |
| AA144045  | Sema7a,Semal,CDw108,H-Sema-L,M-Sema-L,2900057C09Rik  | 1.16E-08 | 2.31082  |
| Z93948    | Sema3e,Semah,AA408817,mKIAA0331                      | 1.14E-07 | 5.40291  |
| AW537349  | Seh1l,Seh1,SEH1A,SEH1B,SEC13L,AW540070,2610007A16Rik | 0.00014  | 5.72159  |
| BB257743  | Sec63,Al649014,AW319215,5730478J10Rik                | 0.00023  | 2.32783  |
| AV216331  | Sec61g                                               | 1.16E-08 | 2.5072   |
| NM_024171 | Sec61b,Al326121,AW122942,MGC102034,1190006C12Rik     | 7.68E-30 | 2.45162  |
| BC003707  | Sec61a1,Sec61a,AA408394,AA410007                     | 7.28E-19 | 2.31823  |
| NM_024206 | Sec13l1,Sec13r,1110003H02Rik                         | 1.76E-07 | 2.9676   |
| BG919982  | Sec11l1,18kDa,Sp18,sid2895,Sid2895p,1810012E07Rik    | 4.53E-09 | 1.60707  |
| AV064339  | Sdpr                                                 | 4.18E-37 | 27.45164 |
| BM233019  | Sdccag8,Cccap,2700048G21Rik,5730470G24Rik            | 0.00009  | 2.34577  |
| AK014025  | Sdccag10,NY-CO-10,3110009E13Rik                      | 8.07E-07 | 1.81761  |
| AV132065  | Scyl3,Pace1,AW214499,6030457O16,1200016D23Rik        | 0.00004  | 5.32876  |
| NM_007926 | Scye1,Emap2,EMAPII                                   | 5.47E-07 | 2.02313  |
| BE951842  | Scn3b,Scnb3,1110001K16Rik,4833414B02Rik              | 1.46E-07 | 3.36439  |
| AV322078  | Scml2,4932420G07Rik                                  | 1.61E-08 | 6.15834  |
| BB297140  | Scmh1,Scml1,Scml3,Al315320,Al851618                  | 0.00001  | 2.26344  |
| NM_054037 | Scgb3a1,HIN-1,Pnsp2,UGRP2,LuLeu2,UGRP2A,Utgrp2,      | 8.36E-07 | 3.76243  |
| BB104560  | Satb2,mKIAA1034                                      | 5.15E-10 | 4.46     |
| AV172776  | Satb1,AW413156,2610306G12Rik                         | 0.00019  | 2.50405  |
| AV023865  | Sap18,EMegR4,Sinbp1,D11Erd539e,C530046K05Rik         | 0.00065  | 1.50569  |
| BG075163  | Sacs,KIAA0730,mKIAA0730,A230052M14,E130115J16Rik     | 9.82E-12 | 2.06382  |
| D00208    | S100a4,42a,18A2,Capl,FSp1,Mts1,pk9a,PeL98,metastasin | 0.00007  | 5.12402  |
| BG229030  | Ryk,Vik,ERK-3,AW536699                               | 2.29E-06 | 7.86106  |
| BQ175050  | Rxra,Nr2b1,RXRalpha1,9530071D11Rik                   | 4.46E-06 | 4.05665  |
| AF439556  | Rwdd3,X2CR1,Al035684,Al662458,3110037C01Rik          | 0.00003  | 2.9089   |
| NM_011304 | Ruvbl2,p47,mp47                                      | 9.76E-09 | 3.49663  |
| NM_019685 | Ruvbl1,Tip49a,Pontin52,2510009G06Rik                 | 2.70E-14 | 2.29965  |
| BB648600  | Rtn4,ASY,NOGO,NSP-CL                                 | 2.17E-08 | 2.39994  |
| NM_009105 | Rsu1,rsf-1                                           | 0.00017  | 2.52618  |
| NM_009104 | Rrm2,R2,AA407299,MGC113712                           | 1.81E-28 | 30.00349 |
| BB758819  | Rrm1,RnrM1                                           | 2.18E-13 | 5.71681  |
| AK005025  | Rqcd1,Fl10,Al593551,2610007F23Rik                    | 0.00008  | 1.77157  |
| NM_011029 | Rpsa,MLR,P40                                         | 0        | 3.36497  |
| BI456571  | Rps9,MGC4138,AL022771,AL022885,3010033P07Rik         | 5.02E-42 | 2.37416  |
| AA419672  | Rps8,MGC107577                                       | 1.91E-10 | 1.80886  |
| AI414989  | Rps7,S7                                              | 0.00007  | 1.68623  |
| BM212538  | Rps6kb1,S6K1,                                        | 0.0009   | 1.86862  |
| BB449218  | Rps6ka6,RSK4,2610524K04Rik                           | 3.51E-17 | 9.84306  |
| C76675    | Rps6,MGC102571,MGC103209                             | 0.00007  | 1.60181  |
| NM_009095 | Rps5,AA617411                                        | 0.00011  | 2.01086  |
| NM_009094 | Rps4x,Rps4,Rps4-1,MGC102174,MGC118104                | 4.00E-39 | 2.41048  |
| BG069767  | Rps3,Rs_3,D7Erd795e                                  | 0.00005  | 4.13791  |
| AV111399  | Rps27l,1810034D23Rik                                 | 2.21E-23 | 3.88802  |
| AA208652  | Rps27,3200001M24Rik                                  | 1.15E-35 | 3.14121  |

|           |                                                       |          |         |
|-----------|-------------------------------------------------------|----------|---------|
| NM_013765 | Rps26                                                 | 1.11E-19 | 2.71793 |
| BM729504  | Rps25,2810009D21Rik                                   | 0.00012  | 2.4107  |
| AK007850  | Rps21,MGC107620,1810049N11Rik,2410030A14Rik           | 0        | 1.94757 |
| AV002845  | Rps20,MGC102408,4632426K06Rik                         | 0        | 2.27581 |
| AK004568  | Rps2,Llrep3,MGC118037                                 | 4.78E-30 | 2.63945 |
| AK004568  | Rps2,Llrep3,MGC118037                                 | 3.41E-15 | 2.0947  |
| NM_023133 | Rps19,MGC107694                                       | 5.42E-37 | 2.43147 |
| AW907444  | Rps18,Ke-3,H-2Ke3,H2-Ke3                              | 2.46E-37 | 2.95709 |
| AV064451  | Rps17,MGC107578,MGC107579                             | 2.37E-16 | 2.08842 |
| NM_013647 | Rps16,AA420385,AI317031                               | 8.81E-35 | 2.42429 |
| NM_009091 | Rps15,rig                                             | 1.79E-07 | 1.64702 |
| NM_026533 | Rps13,MGC102403,MGC118043,2700063M04Rik               | 1.19E-12 | 2.3812  |
| AI413680  | Rps12,MGC102111,MGC102112,MGC102499,MGC117504         | 8.96E-10 | 1.63016 |
| NM_025963 | Rps10,MGC107635,2210402A09Rik                         | 0        | 1.99326 |
| NM_023396 | Rprm,Reprimo,2410012A13Rik                            | 0.00024  | 2.15441 |
| BB729239  | Rpo1-4,mRPA1,194kDa,RPA194,3010014K16Rik              | 0.00021  | 4.39406 |
| NM_009086 | Rpo1-2,RPA2,128kDa,RPA116,RPA135,D630020H17Rik        | 0.00037  | 1.91245 |
| NM_009085 | Rpo1-1,40kDa,RPA40,AA409007,AA959927,AL024089         | 0.00024  | 1.84167 |
| NM_133933 | Rpn1,Rpn-1,AU018702,D6Wsu137e                         | 0.00086  | 1.54325 |
| BC012413  | Rplp2,2700049I22Rik                                   | 0.00007  | 2.21064 |
| AV169685  | Rpl9,MGC102393                                        | 1.31E-11 | 1.62637 |
| NM_012053 | Rpl8                                                  | 2.49E-14 | 1.6268  |
| BC003907  | Rpl7I1,1500016H10Rik                                  | 0.00031  | 1.94179 |
| NM_013721 | Rpl7a,Surf3,Surf-3,MGC103146                          | 2.24E-16 | 1.74043 |
| M85235    | Rpl7,Rpl7a,Surf-3,MGC102113                           | 2.88E-13 | 1.92557 |
| NM_018860 | Rpl41,1810055P16Rik                                   | 1.69E-31 | 2.23002 |
| AV107150  | Rpl39,2810465O16Rik                                   | 5.43E-08 | 1.77411 |
| NM_019865 | Rpl36a,L44L,Rpl44                                     | 9.24E-27 | 1.88614 |
| AV216370  | Rpl36                                                 | 6.66E-14 | 2.31101 |
| NM_025592 | Rpl35,2410039E09Rik                                   | 4.49E-31 | 2.19222 |
| BB756431  | Rpl32,AU020185,rpL32-3A                               | 1.54E-18 | 3.604   |
| NM_053257 | Rpl31,MGC106651,MGC107628                             | 0.00001  | 1.83609 |
| NM_009083 | Rpl30,MGC106425,MGC107559                             | 0        | 1.8506  |
| AI893877  | Rpl29,Rpl43,MGC107574,MGC107575,MGC107576             | 6.87E-19 | 2.07193 |
| NM_009081 | Rpl28,D7Wsu21e,MGC107666,MGC115078                    | 4.01E-07 | 1.82446 |
| NM_011289 | Rpl27,MGC103134                                       | 3.98E-12 | 2.09501 |
| BC025918  | Rpl23,2810009A01Rik                                   | 0        | 2.38084 |
| BB859781  | Rpl22,2700038K18Rik                                   | 0        | 5.06112 |
| BF577616  | Rpl18a,2510019J09Rik                                  | 9.33E-20 | 3.64781 |
| NM_009077 | Rpl18,L18,Rpl18a                                      | 4.65E-34 | 2.88729 |
| NM_025586 | Rpl15,MGC107261,2510008H07Rik                         | 0        | 2.56568 |
| BF146301  | Rpl13a,MGC107571,Tstap198-7,tum-antigen,1810026N22Rik | 7.33E-25 | 2.95434 |
| NM_016738 | Rpl13,L13                                             | 1.07E-25 | 1.92747 |
| NM_009076 | Rpl12,MGC102182,MGC102573,E430018F03                  | 7.87E-11 | 2.39507 |
| AK014593  | Rpl11,2010203J19Rik                                   | 8.70E-12 | 1.65235 |
| AK002613  | Rpl10a,Nedd6,CsA-19                                   | 0        | 2.27546 |
| NM_052835 | Rpl10,QM,QM16,D3Ucla2                                 | 2.43E-07 | 1.65362 |
| NM_023879 | Rpgrip1,AA415034,                                     | 3.66E-06 | 1.56259 |
| BB363084  | Rpe,5730518J08Rik                                     | 0.00002  | 2.81989 |
| NM_026632 | Rpa3,14kDa,C330026P08Rik                              | 7.15E-09 | 3.95737 |
| BC004578  | Rpa2,Rf-A2,AA409079,AI325195,AU020965                 | 7.82E-14 | 6.13627 |

|           |                                                    |          |          |
|-----------|----------------------------------------------------|----------|----------|
| BB366379  | Robo2,mKIAA1568,                                   | 0        | 11.42871 |
| BB176702  | Robo1,DUTT1,AW494633,AW742721                      | 4.27E-13 | 5.83751  |
| AW552536  | Rnu22,snoRNA U22,U22 snoRNA                        | 1.78E-08 | 5.10789  |
| NM_019547 | Rnpc1,Seb4,Seb4l                                   | 0.00043  | 4.08171  |
| AK011864  | Rnf38,Oip1,AA673263,1700065B19Rik,2610202O07Rik    | 4.86E-07 | 2.2363   |
| BC020122  | Rnf2,dinG,Ring1B,AI326319,AI450156,AU019207        | 3.13E-07 | 1.95956  |
| BB125272  | Rnf144,UIP4,AI316797,Ubce7ip4                      | 0.0002   | 1.91764  |
| BC009002  | Rnd3,Arhe,Rhoe,AI661404,2610017M01Rik              | 8.31E-10 | 22.30274 |
| NM_009708 | Rnd2,Arhn,Rohn                                     | 0.00001  | 1.79502  |
| BI410170  | Rnaset2,                                           | 8.12E-15 | 1.92885  |
| AK010292  | Rnaseh2a,RNHL,RNHIA,RNASEHI,2400006P09Rik          | 8.08E-07 | 3.6903   |
| BG072837  | Rkhd3,M-04814,mKIAA2009,4931439A04Rik              | 2.50E-10 | 5.32243  |
| BI656279  | Rkhd2,BM-013,BC035207                              | 3.95E-16 | 2.26708  |
| W91617    | Rkhd1,BC059858,MGC69704                            | 1.59E-22 | 5.65998  |
| AF477481  | Ris2,Cdt1,C76791,AW545653,2610318F11Rik            | 1.32E-13 | 11.81635 |
| AA186144  | Ripk1,RIP,Rinp,D330015H01Rik                       | 0.00035  | 2.32612  |
| BM942043  | Rhobtb3                                            | 0.0001   | 2.09839  |
| BC003838  | Rgs19,GAIP,AI324841,AW547781,2610042F04Rik         | 0.00004  | 3.52613  |
| AK004310  | Rgmb,DRAGON,1110059F19Rik                          | 9.79E-06 | 3.80051  |
| BB148972  | Rfxdc2,9930116O05Rik                               | 1.72E-07 | 2.18476  |
| BB474427  | Rfx3,MRFX3,C230093O12Rik                           | 7.64E-08 | 2.26196  |
| BC027246  | Rfwd3,BC027246,MGC27888                            | 5.85E-20 | 2.60102  |
| AK011489  | Rfc5,36.5kDa,MGC113787,2610020K06Rik,2610209F07Rik | 3.00E-16 | 4.90111  |
| BB251459  | Rfc4,A1,RFC37,AI894123,AU040575                    | 1.76E-20 | 5.5003   |
| AK013095  | Rfc3,38kDa,AU022547,2810416I22Rik                  | 1.26E-13 | 4.63088  |
| AV096765  | Rfc2,40kDa,AI326953,MGC117486,2610008M13Rik        | 8.61E-09 | 3.83649  |
| BB548850  | Rere,ARG,ARP,Atr2,DNB1                             | 1.71E-06 | 1.85453  |
| NM_019484 | Refbp2,REF2,MGC117570,C130042O11Rik                | 4.68E-08 | 3.21257  |
| U01222    | Recc1,140kDa,Alp145,RFC140,MGC96526                | 3.61E-14 | 3.68577  |
| NM_009041 | Rdx,AA516625                                       | 2.18E-06 | 1.91723  |
| NM_138580 | Rdbp,RD,NELF-E,D17H6S45                            | 0.00005  | 2.53078  |
| NM_009037 | Rcn1,Rcn                                           | 1.40E-45 | 5.83609  |
| AV122997  | Rcc2,Td60,                                         | 3.98E-11 | 20.05473 |
| NM_133878 | Rcc1,Chc1,AI326872,4931417M11Rik                   | 3.28E-10 | 9.10933  |
| NM_134083 | Rcbtb2,Chc1l                                       | 0.00003  | 2.33374  |
| NM_019712 | Rbx1,AA517855,1500002P15Rik                        | 0.00049  | 1.6677   |
| NM_009035 | Rbpsuh,CBF1,RBP-J,RBPjk,Igkjrj,Igkrspb,AI843960    | 0.00003  | 2.21925  |
| U63146    | Rbp4,Rbp-4                                         | 8.76E-07 | 1.91324  |
| NM_009033 | Rbmxt,Hnrpg,MGC102184                              | 7.61E-25 | 1.91295  |
| NM_011252 | RbmX                                               | 1.04E-09 | 3.71524  |
| BM119933  | Rbms1,YC1,MSSP-1,MSSP-2,MSSP-3,                    | 0.00022  | 3.50051  |
| NM_025875 | Rbm8a,Rbm8,AA673428,2310057C03Rik                  | 2.44E-06 | 1.74117  |
| AY052560  | Rbm3,MGC118410,2600016C11Rik                       | 0.00003  | 2.51741  |
| NM_029397 | Rbm12,SWAN,                                        | 0.0002   | 1.57674  |
| U27177    | Rbl1,PRB1,p107,AW547426                            | 2.82E-10 | 3.39956  |
| BB167067  | Rbbp8,CtIP,9930104E21Rik                           | 3.78E-21 | 4.84675  |
| BF011461  | Rbbp4,mRbAp48                                      | 4.91E-08 | 3.11337  |
| AV291679  | Rassf4,AD037,AI586137,3830411C14Rik                | 0        | 39.74603 |
| BB703307  | Rassf3,AW212023,AW322379                           | 5.96E-11 | 3.24493  |
| BB667412  | Raph1,9430025M21Rik,C730009O10Rik                  | 0.00025  | 1.52762  |
| BB233502  | Rap2c,AI194294,AL022976,2010200P20Rik              | 0.00002  | 3.03181  |

|           |                                                         |          |          |
|-----------|---------------------------------------------------------|----------|----------|
| BB645629  | Rap2b,AA408554,4021402C18Rik                            | 5.68E-06 | 2.49191  |
| BC025198  | Rap2a,5830461H18Rik                                     | 0.00016  | 1.51823  |
| AW536621  | Ranbp5,IMB3,IPO5,Kpnb3,C76941,                          | 9.93E-06 | 2.2901   |
| L25255    | Ranbp1,Htf9a                                            | 1.75E-15 | 3.27589  |
| AV045569  | Ran                                                     | 2.69E-28 | 1.85316  |
| BM225097  | Ralgps2,AU043409                                        | 8.08E-08 | 3.5459   |
| AV286259  | Rai17,BC065120,E330020C23                               | 3.99E-09 | 2.15177  |
| NM_030690 | Rai14,Norpeg,mKIAA1334,Ankycorbin                       | 4.06E-31 | 9.20907  |
| AK013909  | Rai1,Gt1                                                | 0.00001  | 2.45021  |
| NM_029780 | Raf1,Craf1,Raf-1,c-Raf,v-Raf,                           | 4.03E-08 | 2.36597  |
| AW547464  | Rad54b,Fsbp,MGC67261,E130016E03Rik                      | 0.0002   | 4.00154  |
| NM_053269 | Rad51c,Rad51l2                                          | 3.13E-06 | 3.32542  |
| BC003738  | Rad51ap1,RAB22,2510006L10Rik                            | 9.14E-07 | 4.84298  |
| NM_011234 | Rad51,Reca,Rad51a,AV304093                              | 9.06E-28 | 19.70263 |
| BC006751  | Rad23b,p58,mHR23B,AV001138,0610007D13Rik                | 8.62E-06 | 2.42706  |
| AF332085  | Rad21,SCC1,mKIAA0078                                    | 7.00E-07 | 1.92111  |
| BB530954  | Rad18,Rad18sc,2810024C04Rik                             | 8.19E-20 | 7.50295  |
| NM_012025 | Racgap1,gtl11,Band25,GTPase,                            | 2.61E-15 | 12.77637 |
| BC017514  | Rabl4,2600013G09Rik                                     | 0.00009  | 2.3586   |
| AV205856  | Rabl4,2600013G09Rik                                     | 0.00046  | 1.64093  |
| AW550283  | Rab1,Gtbp,Ypt1,Rab-1,Rab1A,mKIAA3012                    | 0.0006   | 1.82097  |
| AF090403  | Qk,Qkl,l17Wis1,1500005P18,l(17)-1Wis                    | 2.24E-06 | 1.96421  |
| BB270586  | Qars,GLNRS,C80286,MGC105238,1110018N24Rik,1200016L19Rik | 0.00008  | 2.84314  |
| BC006727  | Pycr1,MGC11688                                          | 0.00062  | 8.56001  |
| BG084230  | Pycard,Asc,TNS1,masc,CARD5,TMS-1,9130417A21Rik          | 0.0002   | 2.61105  |
| BE956863  | Pvt1,Mis-1,Pvt-1,Mlvi-1                                 | 0.00006  | 3.9732   |
| NM_021495 | Pvrl3                                                   | 0.00012  | 2.03765  |
| AF069051  | Pttg1,PTTG,Pttg3,C87862,Securin,AW555095                | 0.00067  | 2.47021  |
| BE980029  | Ptprs,PTP,Ptpt9,PTP-NU3                                 | 7.49E-08 | 2.46184  |
| AI596632  | Ptprg,AW046354,AW549872                                 | 0.00002  | 3.16245  |
| BB374993  | Ptprd,                                                  | 1.10E-16 | 2.19864  |
| NM_011210 | Ptprc,B220,Cd45,Ly-5,T200,CD45R,Lyt-4                   | 3.68E-07 | 2.81342  |
| X63440    | Ptpn12,PTPG1,P19-PTP,PTP-P19,PTP-PEST                   | 0.00032  | 1.58237  |
| AV102876  | Ptpla                                                   | 3.67E-09 | 2.95662  |
| AV049645  | Ptp4a2,Pri-2,MGC102154,MGC103400                        | 0.00003  | 1.58631  |
| BF148128  | Ptp4a1,Pri-1                                            | 3.03E-08 | 6.12959  |
| BG073526  | Ptov1,AU041779,1110030G05Rik                            | 0.00037  | 2.54568  |
| BC002064  | Ptn,OSF,HARP,HBBN,HBNF,Osf1,Osf-1,HB-GAM,HBGF-8         | 7.11E-06 | 1.65277  |
| BF787570  | Ptma,Thym,MGC102090,MGC103390                           | 7.66E-06 | 2.43379  |
| AV253087  | Ptgrn,FPRP,CD9P-1,Trim45,AU042434,4833445A08Rik         | 0.00002  | 3.23551  |
| AI666776  | Ptchd2,G630052C06Rik                                    | 0.00042  | 3.39256  |
| NM_008958 | Ptch2,ptc2                                              | 0.00013  | 3.74012  |
| BB040049  | Ptch1,Ptc,mes,Ptc1,Ptch,A230106A15Rik                   | 5.12E-10 | 5.19394  |
| BM195033  | Ptbp2,Ptb2,nPTB,brPTB                                   | 0.00005  | 1.80388  |
| BC007472  | Ptbp1,Ptb,PTB2,PTB3,PTB4,pPTB,HNRPI,PTB-1,AA407203      | 1.59E-10 | 4.38581  |
| NM_019976 | Psrc1,Dda3,MGC7063,AL033312,5430413I02Rik               | 8.15E-28 | 25.01903 |
| BM195254  | Psme4,TEMO,AA409398,AU041366,KIAA0077,mKIAA0077         | 7.01E-29 | 2.78762  |
| NM_011190 | Psme2,PA28b,AA589371,AI788882                           | 3.50E-07 | 2.67989  |
| NM_011189 | Psme1,PA28a,AW413925,MGC113815                          | 5.50E-29 | 3.20919  |
| NM_011875 | Psmc13,S11                                              | 9.44E-11 | 2.21242  |
| BE687992  | Psmc3ip,HOP2,Tbpip,C79099                               | 1.02E-07 | 6.53228  |



|           |                                                                |          |          |
|-----------|----------------------------------------------------------------|----------|----------|
| NM_010724 | Psmb8,Lmp7,Lmp-7                                               | 1.77E-06 | 5.08165  |
| BC014783  | Psmb3,C10-II,MGC106850                                         | 8.64E-07 | 1.60044  |
| BC010709  | Psma5,ZETA,MGC102091,MGC118067                                 | 5.70E-07 | 2.06315  |
| BG066125  | Psma4,C9                                                       | 0.00012  | 1.62836  |
| BC005762  | Psma1,C2,alpha-type                                            | 6.53E-10 | 1.8183   |
| BC004827  | Psat1,PSA,EPIP,Psat,AL024078,AL024083,AU040266,D8Erd814e       | 2.09E-29 | 4.75202  |
| AK014046  | Prr6,AA671303,3110013H01Rik,RP23-234K24.4                      | 8.66E-12 | 3.96402  |
| BM934034  | Prps2,Prps-2,AA589463,AI464149,MGC28388,2610101M19Rik          | 0.00003  | 3.46666  |
| Z25469    | Pros1,AW214361                                                 | 0.00006  | 2.13383  |
| NM_011871 | Prkra,RAX,Pact,AV120107                                        | 0.00028  | 1.6353   |
| BF160591  | Prkcn,MGC47171,4930557O20Rik,5730497N19Rik                     | 1.26E-18 | 3.43136  |
| AV297026  | Prkcm,PKD,Pkcm                                                 | 1.12E-06 | 2.61314  |
| BB216074  | Prkar2b,Pkarb2,AI451071,AW061005,RII(beta)                     | 4.12E-07 | 3.49756  |
| BC016398  | Prkab1,AU021155,E430008F22,1300015D22Rik                       | 0.00015  | 1.91891  |
| NM_008922 | Prim2,AI323589                                                 | 1.25E-06 | 5.10901  |
| J04620    | Prim1,AI324982,MGC107288                                       | 3.48E-07 | 3.90241  |
| NM_011156 | Prep,PEP,AI047692,AI450383,D10Wsu136e                          | 0.00031  | 1.86537  |
| NM_016764 | Prdx4,TRANK,AOE372                                             | 4.06E-08 | 3.84359  |
| NM_011563 | Prdx2,TR,PRP,TPx,TSA,TDX1,NkefB,PrxII,TPx-B,Tdpx1,             | 9.62E-07 | 1.68188  |
| NM_011034 | Prdx1,PAG,Paga,PrxI,TDX2,MSP23,NkefA,OSF-3,TPx-A,Tdpx2         | 3.61E-08 | 1.67291  |
| BC005475  | Prc1,MGC6745,D7Erd348e                                         | 9.46E-20 | 10.48203 |
| AV233215  | Ppwd1,4632422M10Rik,A330090G21Rik                              | 2.45E-10 | 2.61093  |
| BI735251  | Ppp4r2,BE691708,C230060M08Rik                                  | 1.39E-06 | 1.7051   |
| BC026489  | Ppp4r1,Pp4r1,MGC31567,3110001J10Rik                            | 0.00035  | 1.99052  |
| NM_019674 | Ppp4c,Ppx,AU016079,1110002D08Rik                               | 2.21E-12 | 2.20145  |
| AV223153  | Ppp2r2c,PR52,IMYPNO,IMYPNO1,6330548O06Rik                      | 9.67E-24 | 1.93911  |
| AK010754  | Ppp2r1b,AI790395,2410091N08Rik                                 | 0.00026  | 1.64129  |
| AV348753  | Ppp1r14c,KEPI,6330514J04Rik                                    | 0.00033  | 4.00029  |
| BE986849  | Ppp1r14b,Png,PHI-1,AOM172,PLCB3N                               | 0        | 13.76891 |
| BC022648  | Ppil5,LRR-1,AU021780,2410005L11Rik                             | 5.65E-12 | 6.80074  |
| AK004331  | Ppil1,Cyp1,AI327391,1110060O10Rik                              | 2.16E-15 | 3.68736  |
| BC016565  | Ppih,CYPH,CYP-20,                                              | 1.27E-06 | 2.30316  |
| NM_019489 | Ppie,Cyp33,2010010D16Rik                                       | 0.00005  | 2.37851  |
| NM_008908 | Ppic,CyP-20c                                                   | 5.77E-06 | 8.49572  |
| AV051525  | Ppib,Cphn2,Cphn-2,CyP-20b,AA408962,AA553318,AI844835           | 0        | 3.29406  |
| AV305746  | Ppat,                                                          | 0.00009  | 2.28727  |
| BE993443  | Pou3f3,Brn1,Otf8,Brn-1,Skin1                                   | 8.73E-07 | 2.11723  |
| BE991235  | Pou3f2,Brn2,Otf7,Brn-2,9430075J19Rik,A230098E07Rik             | 0.00008  | 5.66529  |
| NM_133931 | Pot1,AI851169,1500031H18Rik                                    | 0.00002  | 2.2385   |
| BB324894  | Pols,POLK,TRF4,LAK-1,TRF4-1,MGC69673                           | 0.00027  | 1.5485   |
| AV260647  | Polr3k,C11,RPC10,RPC11,12.3kDa,AI196849,AU014893,1500004O14Rik | 0.00006  | 1.53565  |
| BC002306  | Polr2h,MGC8248,MGC103049                                       | 2.18E-06 | 2.78058  |
| BC024419  | Polr2f,1810060D16Rik                                           | 6.35E-08 | 1.60264  |
| BF577544  | Pole4,2400007P05Rik,5830430F06Rik                              | 3.32E-08 | 2.97881  |
| AF036898  | Pole2                                                          | 6.93E-12 | 3.40991  |
| NM_011132 | Pole                                                           | 3.94E-28 | 12.1522  |
| AK010805  | Pold3,P66,P68,C85233,2410142G14Rik                             | 5.67E-06 | 2.98049  |
| NM_008894 | Pold2,p50,50kDa,po1D2                                          | 2.69E-06 | 5.21209  |
| BB385244  | Pold1,125kDa                                                   | 0.00002  | 7.1925   |
| NM_008893 | Pola2,AI573378                                                 | 1.66E-15 | 12.46573 |
| NM_008892 | Pola1,Pola,AW321876                                            | 0.00003  | 4.09134  |

|           |                                                      |          |          |
|-----------|------------------------------------------------------|----------|----------|
| BB473446  | Pnma2,KIAA0883,mKIAA0883,A830049P17Rik               | 2.39E-06 | 8.02054  |
| AI326372  | Pnlip,PTL,MGC74173,1810007A24Rik                     | 0.00075  | 2.19414  |
| BM220776  | Pml,Trim19,AI661194,1200009E24Rik                    | 0.00037  | 4.19705  |
| BB476707  | Plxnc1,CD232,Vespr,AW742158,2510048K12Rik            | 0.00072  | 2.46614  |
| AK012816  | Plp2,mLMA4,MGC102445,MGC103126                       | 0.00001  | 3.59105  |
| BC021352  | Plod2,LH2,Plod-2,D530025C14Rik                       | 1.76E-14 | 5.1342   |
| BB706079  | Plk4,Sak,Stk18,AI385771,1700028H20                   | 5.20E-25 | 13.16696 |
| NM_011121 | Plk1,Plk,STPK13                                      | 1.81E-11 | 12.20859 |
| BQ031094  | Plekha8,FAPP2,AA517676,BC052360,6330400G01           | 0.00006  | 1.61527  |
| BM121087  | Plcg1,Cded,Plc-1,Plcg-1,AI894140,Plc-gamma1          | 0.00017  | 2.80794  |
| AW539022  | Pknox1,PREP1,D17Wsu76e                               | 4.29E-12 | 2.73703  |
| AW763881  | Pitrm1,MP1,Ntup1,AA410010,mKIAA1104,2310012C15Rik    | 0.00057  | 1.82625  |
| BQ174042  | Pip5k2b,c11,AI848124,PI5P4Kbeta                      | 0.00085  | 1.73366  |
| AW012413  | Pin4,EPVH,Par14,2410002I22Rik                        | 0.00011  | 1.58178  |
| AI323550  | Pim1,Pim-1                                           | 6.79E-08 | 6.10866  |
| NM_009344 | Phlda1,Tdag,TDAG51,DT1P1B11                          | 2.99E-06 | 2.02697  |
| AK012667  | Phip,Ndrp,Wdr11,2810004D21Rik,4632404O06Rik          | 5.33E-15 | 1.84315  |
| AA561726  | Phgdh,                                               | 0.00005  | 2.69232  |
| BF147362  | Phf6,mKIAA1823,2700007B13Rik,4931428F02Rik           | 0.00004  | 1.71405  |
| BC025161  | Phf5a,1110007B08Rik                                  | 6.69E-07 | 2.04832  |
| BB322180  | Phf21b,A730032D07Rik                                 | 8.52E-09 | 10.31067 |
| BG064477  | Phf16,Jade3,AI851988,AW544806,mKIAA0215,5730598B06   | 0.00028  | 3.79688  |
| AK003209  | Phf14                                                | 8.95E-09 | 4.05281  |
| BE650359  | Phc1,Edr,Edr1,Mph1,rae28,Rae-28,AW557034             | 1.34E-07 | 2.8207   |
| BB791424  | Phb2,BAP,REA,Bap37,Bcap37,AU044498                   | 7.77E-11 | 4.21792  |
| AV248174  | Phactr4                                              | 0.00001  | 1.92421  |
| AI549850  | Pgm1,Pgm2,Pgm-1,3230402E02Rik                        | 0.00011  | 1.93869  |
| BC006594  | Pgls,Plgs,AI447866,1110030K05Rik                     | 8.14E-10 | 3.77616  |
| NM_011072 | Pfn1,Pfn                                             | 0.00068  | 1.88725  |
| BF531162  | Pfdn4,C1,C-1,PF4,0610025M10Rik,1810063B06Rik         | 2.91E-07 | 2.48817  |
| AV306055  | Pfas,Gm18,PURL,FGAMS,FGARAT,                         | 2.79E-08 | 2.03128  |
| BB550758  | Peo1,PEO,Twinl,MGC41750,D19Erttd626e                 | 8.51E-09 | 3.19506  |
| NM_033602 | Peli2,AW047589,BB129927                              | 0.00043  | 3.32964  |
| BE692322  | Peli1,AA409794,AI586297                              | 0.00027  | 1.7586   |
| AK009478  | Peci,DRS1,ACBD2,HCA88                                | 1.45E-06 | 2.09737  |
| AV174487  | Pdzm4,LNX4,KIAA3027,SAMCAP3L,mKIAA3027,1110017D07Rik | 8.33E-11 | 13.6707  |
| NM_018884 | Pdzm3,LNX3,Semcap3,AI429718,AL023082,1110020C07Rik   | 3.28E-29 | 16.33891 |
| BC006865  | Pdia6,P5,CaBP5,C77895,Txndc7,AL023058,1700015E05Rik  | 0.00058  | 2.12421  |
| BC009151  | Pdia5,Pdir,AU015525,2700053F16Rik                    | 0.00009  | 3.75328  |
| J05186    | Pdia4,Cai,Erp72,AI987846                             | 0.00006  | 3.05667  |
| BB221015  | Pdgfra,CD140a,Pdgfr-2,AI115593                       | 6.64E-14 | 15.4073  |
| BB371842  | Pdgfa                                                | 1.24E-06 | 5.30152  |
| AU015378  | Pde7a,AU015378,AW047537                              | 4.81E-15 | 2.42081  |
| AV270888  | Pde3b,AI847709                                       | 1.74E-10 | 2.34513  |
| BB131735  | Pde1c                                                | 0.0007   | 3.73586  |
| AK003899  | Pdcd11,ALG-4,Pdcd7,mKIAA0185,1110021I22Rik           | 0.00054  | 1.93445  |
| BG065186  | Pdap1,PAP,PAP1,HASPP28                               | 5.65E-13 | 1.84475  |
| BB098115  | Pcyox1,PCL1,Pcly,AI115532,AI448340,1200015P13Rik     | 0.00003  | 1.83668  |
| NM_008787 | Pcnt,KEN,Pcnt2,C86676,kendrin,AW476095               | 0.00002  | 2.11052  |
| BC010343  | Pcna                                                 | 0        | 4.16684  |
| AW545979  | Pcm1,2600002H09Rik,9430077F19Rik,C030044G17Rik       | 2.55E-07 | 1.95452  |

|           |                                                       |          |          |
|-----------|-------------------------------------------------------|----------|----------|
| M64279    | Pcgf4,Bmi1,Bmi-1,AW546694                             | 0.00029  | 1.60689  |
| BG075606  | Pcgf3,Rnf3,DONG1,RNF3A,                               | 1.35E-11 | 2.54635  |
| BM218630  | Pcdh18,PCDH68L,BB095589,3110038E07Rik                 | 0.00006  | 4.75842  |
| NM_021567 | Pcbp4,AlphaCP-4,1200003L19Rik                         | 0.00046  | 1.93154  |
| NM_011865 | Pcbp1,WBP17,[a]CP-1,alphaCP-1                         | 5.52E-08 | 1.98239  |
| BB053254  | Pbx3                                                  | 4.45E-21 | 7.92874  |
| BM114723  | Pbx1,Pbx-1,D230003C07Rik                              | 3.76E-06 | 2.94419  |
| AK008037  | Pbp1,Pbp,HCNP,Pbpr,Pepp1,MGC102065,MGC103131          | 2.81E-07 | 10.11897 |
| NM_023209 | Pbk,TOPK,AW538537,D14ErtD732e,2810434B10Rik           | 3.24E-15 | 16.30398 |
| AW553622  | Pb1                                                   | 1.30E-11 | 2.57494  |
| BB729869  | Pask,mKIAA0135                                        | 0.00031  | 5.34893  |
| BB026163  | Parp11,HIN1L,AI851877,5330431N24Rik                   | 4.51E-08 | 2.95859  |
| AF126717  | Parp1,PARP,PPOL,Adprp,Adprt1                          | 0.00002  | 1.97404  |
| NM_011863 | Papss1,SK1,Asapk,AI325286                             | 0.00002  | 1.52543  |
| AK010469  | Paox,Pao,AI118225,2410012F02Rik                       | 0.0003   | 2.79605  |
| NM_019482 | Panx1,AI847747                                        | 3.48E-14 | 6.67193  |
| AA220626  | Pam                                                   | 6.57E-17 | 1.77602  |
| BQ175796  | Pak3,Stk4,mPAK-3,Pak65beta,Pak65alpha                 | 2.65E-09 | 4.08228  |
| BM207712  | Paics,AIRC,PAIS,ADE2H1,2610511I09Rik                  | 3.08E-16 | 1.80052  |
| NM_008776 | Pafah1b3,Pafahg,mus[g]                                | 1.49E-09 | 4.67486  |
| AI536269  | Pacs1,AI325977,MGC37046                               | 0.00051  | 4.89442  |
| BG806432  | Pabpn1,PAB2,Pabp3,mPABII                              | 4.78E-07 | 2.05769  |
| NM_008774 | Pabpc1,PABP,Pabp1,Pabpl,Pabpl1                        | 1.39E-08 | 2.76789  |
| AI152156  | Pa2g4,Ebp1,38kDa,Plfap,AA672939                       | 2.20E-15 | 4.02198  |
| BM232513  | P4hb,PDI,Thbp,ERp59                                   | 3.49E-10 | 1.89125  |
| AK008952  | P2ry5,P2y5,2610302I02Rik                              | 6.92E-06 | 2.30417  |
| BC017609  | Otx2,E130306E05Rik                                    | 2.14E-07 | 8.25551  |
| BM238914  | Otud4,AI449692,D8ErtD69e,mKIAA1046,4930431L18Rik      | 8.48E-08 | 1.81503  |
| AB015978  | Osmr,OSMRB                                            | 0.00002  | 3.18924  |
| NM_019716 | Orc6l,Orc6,MGC91038,6720420I10Rik                     | 4.63E-06 | 2.93804  |
| AB038697  | Olig2,RK17,Olg-2,Bhlhb1,Oligo2,AI604895               | 6.98E-07 | 4.23878  |
| AB038696  | Olig1,Olg-1,Bhlhb6,Oligo1,AI836478,AW494459           | 2.18E-23 | 2.27048  |
| BB238604  | Oip5,5730547N13Rik                                    | 0.00009  | 6.58893  |
| AV127023  | Odz4,Doc4,ELM2,I7Rn3,R75022,Ten-m4,I(7)-3Rn,mKIAA1302 | 4.41E-08 | 2.17345  |
| C81193    | Odc1,ODC,MGC103389                                    | 1.54E-43 | 3.34311  |
| NM_019761 | Nxt1,1110001N02Rik                                    | 0.00066  | 2.35225  |
| NM_130858 | Nxph3                                                 | 2.17E-07 | 3.76106  |
| AU018817  | Nuff2,Ntf2,Ntf3,PP15,                                 | 3.15E-29 | 3.29175  |
| BC009096  | Nusap1,LNP,ANKT,SAPL,                                 | 5.05E-23 | 15.44682 |
| BC023140  | Nup93,2410008G02Rik                                   | 1.16E-08 | 3.30686  |
| AK002643  | Nup88,88kDa,Nup84,Prei2                               | 0.00038  | 1.5856   |
| BB320388  | Nup85,Pcnt1,frount,MGC105225                          | 9.76E-06 | 2.18503  |
| AW240611  | Nup62,p62,Nupc1                                       | 4.82E-18 | 6.3823   |
| AW681678  | Nup54,54kDa,3110079L04Rik                             | 0.00072  | 2.5759   |
| NM_016714 | Nup50,Npap60,AI413123,1700030K07Rik                   | 0.0004   | 2.03636  |
| BC011102  | Nup37,2410003L22Rik,2810039M17Rik                     | 1.92E-07 | 3.48586  |
| BQ177153  | Nup205,AV248391,mKIAA0225,3830404O05Rik               | 2.86E-11 | 4.35043  |
| BG073833  | Nup155,mKIAA0791,D930027M19Rik                        | 0.00009  | 2.80312  |
| BB314153  | Nup133,4832420O05Rik                                  | 0.00003  | 1.97664  |
| BC004655  | Nup107,C76801,AW541137                                | 1.44E-09 | 7.09159  |
| BC004571  | Nudt5                                                 | 0.00003  | 1.88608  |

|           |                                                          |          |          |
|-----------|----------------------------------------------------------|----------|----------|
| BC008270  | Nudt21,                                                  | 0        | 3.68696  |
| NM_008637 | Nudt1,Mth1                                               | 2.72E-11 | 4.60609  |
| BM207059  | Nudcd3,                                                  | 1.77E-12 | 1.80324  |
| BC005646  | Nudcd2,                                                  | 0.00001  | 2.91949  |
| BI660933  | Nudcd1,                                                  | 1.44E-07 | 2.72265  |
| BM209748  | Nucks1,Nucks,C78391,AI647518,2700010L10Rik,8430423A01Rik | 0.00062  | 1.57445  |
| AV216677  | Nsmce1,2510027N19Rik                                     | 4.71E-08 | 3.71822  |
| BB227199  | Nsg2,8.5,R75287,AA989750                                 | 1.90E-06 | 4.45033  |
| AI413236  | Nsd1,AI528500                                            | 0.00003  | 2.25631  |
| NM_016710 | Nsbp1,GARP45,NBP-45,MGC103386                            | 6.39E-18 | 2.78444  |
| NM_134122 | Nrm,AI429796                                             | 0.00042  | 2.75976  |
| AK010412  | Nras,N-ras,AV095280                                      | 2.24E-11 | 2.71036  |
| BI696369  | Nrarp,2700054M22Rik                                      | 0.00018  | 2.02763  |
| BB343142  | Npn2,HT/02                                               | 0.00038  | 2.60988  |
| AK005498  | Npm1,B23,NO38,MGC102162,MGC107291                        | 3.55E-06 | 1.92475  |
| BC022734  | Npl,0610033B02Rik                                        | 0.00033  | 5.36027  |
| BC007190  | Npc2,HE1,AA408070,AU045843,2700012J19Rik                 | 0        | 2.20849  |
| NM_020043 | Nope,DDM36,WI-18508,mKIAA1628,9330155G14Rik              | 9.10E-06 | 1.8188   |
| NM_023144 | Nono,nonA,NRB54,P54NRB,AA407051,AV149256,MGC103109       | 5.71E-20 | 2.54166  |
| BM213850  | Nolc1,P130,                                              | 0.00017  | 2.39754  |
| AK004120  | Nola3,NOP10,NOP10P,1110036B12Rik                         | 1.24E-08 | 1.52265  |
| BC024944  | Nola2,Nhp2,D11ErtD175e,2410130M07Rik                     | 2.64E-10 | 3.86071  |
| NM_026578 | Nola1,GAR1,AA409823,AI326794,C430047J18Rik               | 5.69E-06 | 2.4083   |
| AK014568  | Nol9,AI449622,AW490720,4632412I24Rik,6030462G04Rik       | 0.00005  | 3.71136  |
| AK017551  | Nol8,                                                    | 3.94E-06 | 1.87589  |
| BF660256  | Nol5a,NOP56,2310044F10Rik                                | 7.03E-06 | 2.95855  |
| BB729616  | Nol5,SIK,MSSP,MGC105209                                  | 1.68E-18 | 2.57534  |
| AV338483  | Nol4,Gm1262,1700013J13Rik,4930568N03Rik                  | 4.87E-20 | 2.40124  |
| BC008518  | Nnt,AI323702,BB168308,4930423F13Rik                      | 6.23E-24 | 2.31193  |
| AV218841  | Nnat,Peg5,AW107673,5730414I02Rik                         | 6.15E-14 | 3.55995  |
| NM_138314 | Nme7,Nm23-M7,Nm23-r7,D530024H21Rik                       | 5.98E-07 | 1.71282  |
| NM_019731 | Nme4,Nm23M4,NM23-M4,2610027N22Rik,                       | 0.00006  | 4.36421  |
| NM_008705 | Nme2,NM23B,nm23-M2,MGC107562,MGC107563                   | 3.12E-20 | 2.44167  |
| BC005629  | Nme1,NM23A,AL024257                                      | 0.00014  | 1.61986  |
| BB636266  | Nlk,AI194375                                             | 0.00041  | 2.19549  |
| NM_027280 | Nkd1,2810434J10Rik,9030215G15Rik                         | 4.53E-08 | 7.47074  |
| NM_025623 | Nipsnap3a,Nipsnap3b,2700063N13Rik                        | 0.00011  | 4.75835  |
| AU024536  | Ninj1,AU024536                                           | 0.00024  | 7.46856  |
| BM230024  | Nin,AI385615,mKIAA1565                                   | 0.00077  | 10.96609 |
| AV322710  | Nhlh2,Hen2,NSCL2,Nscl-2,6230401I09Rik                    | 1.15E-17 | 6.52408  |
| NM_010916 | Nhlh1,Hen1,Nscl,Tal2                                     | 8.10E-20 | 13.76147 |
| BI407690  | Ngfrap1,Bex3,Nade,AL033356,DXWsu67e                      | 0.00009  | 1.56272  |
| BB151515  | Ngfr,p75,LNGFR,p75NTR,p75NGFR,Tnfrsf16                   | 1.08E-11 | 10.44533 |
| AV250496  | Nfyb,Cbf-A,AA985999                                      | 0.00014  | 1.74653  |
| NM_133921 | Nfxl1,GCF,TCF9,DNABF                                     | 0.00074  | 1.75841  |
| BI687652  | Nfib,6720429L07Rik,E030026I10Rik                         | 1.07E-08 | 5.65974  |
| BB453909  | Nfia,NF1-A,1110047K16Rik,9430022M17Rik                   | 7.23E-10 | 11.375   |
| NM_010902 | Nfe2l2,Nrf2,AI194320                                     | 6.83E-07 | 1.80678  |
| NM_009717 | Neurod6,Nex,Atoh2,Math2,Nex1m,Math-2,MGC90713            | 0.00006  | 5.06329  |
| BB250949  | Neurod4,ATH-3,Atoh3,Math3,MATH-3,AI846749                | 0.00041  | 4.05026  |
| BB129888  | Neo1,AI327052,2610028H22Rik,D930014N22Rik                | 1.92E-09 | 4.50783  |

|           |                                                        |          |          |
|-----------|--------------------------------------------------------|----------|----------|
| NM_080849 | Nek8,jck,4632401F23Rik                                 | 0.00033  | 2.86066  |
| AV277343  | Nek7,AU020186                                          | 7.99E-06 | 6.28591  |
| BC019524  | Nek6,1300007C09Rik                                     | 0.0007   | 3.85271  |
| C77054    | Nek2,C77054,AA617254                                   | 1.20E-21 | 5.58493  |
| AV316939  | Neil3,C85903,AI449477,                                 | 6.89E-07 | 10.01467 |
| NM_010890 | Nedd4,Nedd4a,Nedd4-1,                                  | 1.40E-45 | 2.00984  |
| BB829652  | Nedd1                                                  | 2.45E-08 | 6.47348  |
| BI652065  | Ndst1,Hsst,NDST-1,1200015G06Rik                        | 0.00007  | 2.37903  |
| BQ032232  | Nde1,Nude,mNudE,AU042936,AW822251,2810027M15Rik        | 6.61E-10 | 4.12643  |
| BM293428  | Ncstn,Nct,Aph2,AA72731                                 | 0.00074  | 3.62808  |
| NM_011424 | Ncor2,SMRT,N-CoR,SMRTe                                 | 2.63E-10 | 4.06978  |
| BF118393  | Ncl,C23,Nucl,D0Nds28,D1Nds28,B530004O11Rik             | 6.38E-19 | 1.74895  |
| BM238906  | Nckap1I,Hemp1,AI463083,4930568P13Rik                   | 0.00057  | 4.39214  |
| BE948993  | Nck2,Grb4,NCKbeta                                      | 0.00076  | 1.96754  |
| AI844633  | Ncf1,NOXO2,Ncf-1,p47phox,p47<phox>                     | 0.00009  | 3.61612  |
| BE980206  | Nav1,POMFIL3,unc53H1                                   | 9.36E-08 | 4.42798  |
| BG069191  | Nasp,Epcs32,AI131596,AI317140,5033430J04Rik            | 3.80E-06 | 11.21763 |
| AK007755  | Narg1I,1300019C06Rik                                   | 0.00035  | 1.65024  |
| BE627942  | Napg,SNARE,2400003O04Rik                               | 0.00001  | 2.50638  |
| AA260459  | Nap1I1,NAP-1,AA407126,AI256722,D10ErtD68e              | 3.14E-20 | 3.16988  |
| AA406997  | Myo1b,AA406997,myosin-1b                               | 0.00001  | 7.27196  |
| U13262    | Myef2,mKIAA1341,9430071B01                             | 0.00037  | 3.04287  |
| BC005453  | Mycn,Nmyc,N-myc,Nmyc1,Nmyc-1,c-nmyc                    | 8.83E-38 | 19.56336 |
| BC006728  | Myc,Myc2,Nird,Niard,c-myc,AU016757                     | 1.28E-06 | 6.45866  |
| NM_033597 | Myb,c-myb,M16449,AI550390,MGC18531                     | 3.79E-16 | 11.44486 |
| NM_053213 | Mxd3,Mad3,4631412E13Rik                                | 0.00004  | 3.60349  |
| AV225865  | Muted,mu,1810074A19Rik                                 | 0.00075  | 1.50875  |
| BB103233  | Mum1I1,9430086K21Rik                                   | 9.03E-09 | 11.54769 |
| NM_023431 | Mum1,UBE-1C2                                           | 1.20E-09 | 2.26022  |
| NM_023166 | Mtvr2,MMTV,1110021A21Rik                               | 5.88E-12 | 5.18285  |
| BB157298  | Mtss1,Mim,                                             | 0.00015  | 4.21536  |
| BG076333  | Mthfd2,NMDMC,AW558851                                  | 0.00004  | 6.50575  |
| BG075139  | Mtap,MSAP,1300019I21Rik                                | 9.90E-29 | 3.63366  |
| AV296905  | Mta2,mmta2,Mta1I1,Mata1I1,AW550797                     | 0.00063  | 3.03779  |
| BC016551  | Msr2,IgSR,Fcrh2,IFGP2,MMAN-g,FcRH2sc,                  | 0.00002  | 4.77581  |
| BQ175453  | Msn,C78546                                             | 1.77E-06 | 2.38329  |
| NM_010832 | Msl3I,Msl3I1,AU018931                                  | 0.00019  | 1.53551  |
| BC024402  | Ms4a7,CFFMA,CD20I4,9130422I10Rik,A430103C15Rik         | 1.17E-12 | 10.55188 |
| NM_027209 | Ms4a6b,1810027D10Rik                                   | 0.00009  | 2.35963  |
| AV304074  | Mrps35,MDSO23,MRPS28,MRP-S28,MGC28446                  | 0.00009  | 2.31303  |
| Y17852    | Mrps33,Gdap3,PTD003,CGI-139,MRP-S33,AI841153,MGC106490 | 1.63E-07 | 1.72214  |
| BC022162  | Mrpl53,1110007K17Rik                                   | 0.00019  | 1.71712  |
| BF787384  | Mrpl35,1110066C01Rik                                   | 0.00001  | 2.34146  |
| AB049641  | Mrpl13,1110002D09Rik                                   | 0.0003   | 1.949    |
| AK003513  | Mpz1I,PZR,1110007A10Rik                                | 0.00006  | 2.51879  |
| AK012553  | Mpped2,239Fb,AV354767,AW060960,2700082O15Rik           | 0.00004  | 2.42576  |
| BB540670  | Mphosph9,MPP9,MPP-9,C                                  | 0.00067  | 2.4091   |
| BB200034  | Mphosph1,B130024C23,C330014J10Rik                      | 6.61E-17 | 15.68225 |
| L20315    | Mpeg1,MPS1,Mpg-1                                       | 2.09E-10 | 22.27444 |
| BC011285  | Mobk1b,MOB1,MOB4B,MGC6884,4022402H07Rik                | 3.17E-12 | 2.11486  |
| NM_008613 | Mns1,AW546487                                          | 3.77E-17 | 6.7184   |

|           |                                                         |          |          |
|-----------|---------------------------------------------------------|----------|----------|
| BF147716  | Mmp2,GelA,Clg4a,MMP-2                                   | 0.00079  | 5.64624  |
| BB667813  | Mlf1ip,1700029A22Rik                                    | 7.71E-07 | 6.18091  |
| NM_021462 | Mknk2,Mnk2,Gprk7,2010016G11Rik                          | 0.00077  | 1.58016  |
| NM_013791 | Mkln1,AU015903,BB154892,A130067F06Rik                   | 0.00037  | 1.82384  |
| X82786    | Mki67,Ki-67,D630048A14Rik                               | 1.86E-38 | 53.49155 |
| BC026790  | Mis12,Misc12,AU044651,RP23-83113.9,2510025F08Rik        | 0.00002  | 2.33242  |
| AK013451  | Mina,AI449204,1810047J07Rik,2410057H13Rik,3830408E23Rik | 0.00058  | 2.78198  |
| NM_021565 | Midn,3000003C15Rik                                      | 0.00039  | 2.47971  |
| BG073178  | Mid1,Fxy,61B3-R,Trim18,MGC60591,DXHXS1141               | 0.00053  | 5.04933  |
| NM_138315 | Mical1,MICAL,Nical,MGC27831,MGC38321                    | 9.34E-10 | 16.62691 |
| AW494220  | Mgl2,MGC123939,MGC124077                                | 6.60E-08 | 4.47223  |
| NM_023799 | Mgea5,Hy5,                                              | 1.00E-08 | 2.14452  |
| BB093351  | MGC65590                                                | 0.00001  | 5.77318  |
| BC024891  | Mfsd1,1200003O06Rik                                     | 0.00003  | 2.18154  |
| AW536327  | Mfap3,AW536327,2610509F16Rik,2700079M14Rik              | 7.09E-08 | 1.7351   |
| BG086961  | Metap2,p67,Amp2,Mnpep,AI047573,AL024412,MGC102452       | 1.83E-06 | 1.89131  |
| NM_010790 | Melk,MPK38,AI327312,mKIAA0175                           | 1.31E-19 | 19.89318 |
| BM123004  | Meis1,Evi8,C530044H18Rik                                | 3.40E-06 | 4.43305  |
| NM_026119 | Med4,Vdirp,Vdrip,DRIP36,TRAP36,HSPC126,2410046H15Rik    | 2.69E-06 | 1.88676  |
| AK012187  | Med25,ESTM2,X83308,2610034E13Rik,2610529E18Rik          | 3.79E-06 | 2.51679  |
| AV313203  | Mdm1,Mdm-1                                              | 0.00034  | 3.21813  |
| M34328    | Mdk,MK,Mek,cytokine                                     | 0.00013  | 1.88166  |
| AK004706  | Mdga1,GPIM,1200011I03Rik                                | 7.97E-07 | 8.62545  |
| U13371    | Mdfic,Kdt1,Mdfid                                        | 2.09E-10 | 3.94108  |
| NM_008571 | Mcpt2,Mcp-2,MMCP-2                                      | 0.00002  | 4.73565  |
| NM_008570 | Mcpt1,Mcp-1,AV080368                                    | 0.00004  | 4.81244  |
| AK010365  | Mcm8,5730432L01Rik                                      | 0.00011  | 3.15395  |
| NM_008568 | Mcm7,Mcmd7,mCDC47                                       | 3.62E-31 | 11.59573 |
| NM_008567 | Mcm6,Mcmd6,ASP-I1,D1Wsu22e                              | 0        | 65.09827 |
| AI324988  | Mcm5,Cdc46                                              | 1.38E-38 | 13.01738 |
| BC013094  | Mcm4,19G,Cdc21                                          | 3.08E-12 | 5.02924  |
| C80350    | Mcm3,P1,Mcmd,p1.m,C80350,AL033361                       | 3.25E-14 | 19.09696 |
| BB699415  | Mcm2,BM28,CDCL1,Mcmd2,AA959861,AW476101,mKIAA0030       | 9.25E-18 | 9.16332  |
| AK010648  | Mcm10,C79164,AU018508,2410041F14Rik,C330019M07Rik       | 7.41E-12 | 5.93968  |
| BC003839  | Mcl1,AW556805                                           | 6.54E-22 | 1.69657  |
| BM224735  | Mbtd1,hemp,AA408199,AI194990                            | 4.81E-10 | 2.76672  |
| AF072249  | Mbd4,Med1                                               | 0.00006  | 1.82951  |
| BB444511  | Matr3,AI841759,AW555618,mKIAA0723,D030046F20Rik         | 0.00011  | 2.00055  |
| BG065061  | Mat2a,MGC6545,D630045P18Rik                             | 1.22E-10 | 2.19381  |
| BG072383  | Mastl,THC2,C88295,MGC117975,2700091H24Rik               | 0.00056  | 3.95325  |
| BB367890  | Mast2,Mtssk,MAST205,mKIAA0807                           | 0.0003   | 2.43588  |
| BM211104  | Mars,MTRNS,MetRS,MGC90747                               | 0.00022  | 1.58675  |
| AV110584  | Marcks1,F52,Mlp,Mrp,                                    | 7.41E-26 | 9.00471  |
| BB454540  | Marcks,Macs,PKCSL                                       | 2.18E-11 | 2.51756  |
| AK005032  | March8,Mir,1300017E09Rik                                | 0.00013  | 2.31428  |
| BM228525  | Mapre1,Eb1,BIM1p,                                       | 4.24E-13 | 2.49558  |
| NM_010765 | Mapkapk5,MK5,PRAK                                       | 0.00004  | 1.70863  |
| NM_008696 | Map4k4,HGK,Nik,AU045934                                 | 2.42E-20 | 10.1612  |
| AW547374  | Map3k7,Tak1,C87327,B430101B05                           | 0.00022  | 2.78622  |
| BM240275  | Map3k1,Mekk,MEKK1,MAPKKK1                               | 4.82E-29 | 11.01997 |
| BB540608  | Map2k6,MEK6,MKK6,Prkmk6,SAPKK3                          | 8.15E-06 | 2.65889  |

|           |                                                            |          |          |
|-----------|------------------------------------------------------------|----------|----------|
| AK013287  | Mak3,Mak3p,AW112078,2600005K24Rik,2810441M03Rik            | 1.03E-07 | 1.5263   |
| NM_010760 | Magoh                                                      | 9.43E-12 | 2.56509  |
| BF180812  | Magi3,                                                     | 1.17E-08 | 4.05431  |
| AV326943  | Magi1,AIP3,BAP1,                                           | 0.00051  | 2.07299  |
| AF319976  | Maged2,ORF1,Mage-d2                                        | 0.00021  | 2.76506  |
| AV006603  | Mageb3,Smage3,Mage-b3,Mage-ps1,Mage-rs3                    | 0.00047  | 1.69573  |
| BC011282  | Mad2l2,REV7,MAD2B,2310033C13Rik                            | 1.69E-14 | 6.48627  |
| NM_019499 | Mad2l1,MAD2,AA673185,MGC113763                             | 8.73E-21 | 9.41866  |
| NM_011839 | Mab2l1l2                                                   | 2.07E-33 | 17.08404 |
| AV066625  | Lzp-s                                                      | 0        | 13.19752 |
| AK007657  | Lzic,AW047580,1810030J04Rik                                | 0.00009  | 3.20432  |
| AW208566  | Lyzs,Lys,Lzm,Lzp,Lzm-s1,AI326280                           | 0        | 15.68719 |
| NM_025281 | Lyar                                                       | 2.69E-16 | 2.39869  |
| NM_010745 | Ly86,MD1,MD-1                                              | 8.84E-09 | 4.94398  |
| NM_133762 | Luzp5,Mtb,5830426I05Rik                                    | 2.88E-15 | 6.46737  |
| BG070818  | Luc7l2,Cg174,CGI-59,CGI-74,AA522013,AU015269,4930471C18Rik | 4.40E-06 | 2.39831  |
| BC014865  | Ltb4dh,2510002C21Rik                                       | 9.23E-16 | 5.2389   |
| BM211048  | Ltap,Lp,Lpp1,stbm,Vangl2,Vang1l2,C530001F03Rik             | 1.78E-06 | 2.64248  |
| BI696719  | Lta4h                                                      | 1.96E-08 | 1.66269  |
| NM_133939 | Lsm8,AW214405,2010003I05Rik                                | 3.83E-11 | 3.28219  |
| NM_025520 | Lsm5,2010208O10Rik,2310034K10Rik                           | 3.64E-12 | 3.74168  |
| NM_015816 | Lsm4                                                       | 0.00005  | 3.04383  |
| NM_026309 | Lsm3,SMX4,USS2,1010001J12Rik,6030401D18Rik                 | 5.81E-30 | 4.0184   |
| AF204156  | Lsm2,G7b,SmX5,Dmapl,Sm-X5,snRNP,Dmpkap                     | 1.94E-14 | 4.19274  |
| BG073826  | Lrrtm1,AW125451,4632401D06Rik                              | 0.00004  | 4.15124  |
| BB541889  | Lrriq2,AA437768,2810403B08Rik,4932439K18Rik,E130116N02Rik  | 0.00008  | 1.6067   |
| AV310220  | Lrrc41,MUF1,                                               | 4.21E-22 | 15.52652 |
| AW907805  | Lrp1b,LRP-DIT,9630004P12Rik                                | 1.43E-19 | 1.94592  |
| BB524113  | Lrig3,mKIAA3016,9030421L11Rik,9130004I02Rik,9430095K15Rik  | 8.76E-23 | 18.69165 |
| BB104671  | Lrig3                                                      | 2.45E-08 | 8.35878  |
| AF188507  | Lrba,Lba,C80285,Lab300,D3Ertd775e                          | 0        | 7.72464  |
| NM_080420 | Lpo,5830499B15Rik                                          | 0.00007  | 4.48499  |
| BC003305  | Lpl                                                        | 0.00001  | 8.53543  |
| AF357006  | Loxl1,Loxl,MGC106801                                       | 8.67E-08 | 5.61288  |
| BB795075  | LOC98434                                                   | 1.95E-12 | 3.77356  |
| BB344065  | LOC552908                                                  | 0.00019  | 2.2739   |
| BM240205  | LOC548102                                                  | 7.48E-06 | 3.59356  |
| AV167958  | LOC545536                                                  | 2.84E-12 | 1.65317  |
| BM195235  | LOC544986,                                                 | 0.00007  | 1.97045  |
| AV217426  | LOC544823                                                  | 2.07E-07 | 1.90702  |
| BB166401  | LOC432971                                                  | 0.00009  | 2.79522  |
| BM204579  | LOC432798                                                  | 0.00002  | 2.34937  |
| BI081163  | LOC384179                                                  | 1.31E-07 | 2.11848  |
| BG073393  | LOC382639                                                  | 8.44E-06 | 4.41901  |
| BM229128  | LOC382156                                                  | 3.51E-13 | 3.09918  |
| AW763751  | LOC277193,LOC432650,LOC432898                              | 1.25E-06 | 8.5713   |
| BB204486  | LOC224870                                                  | 0.00009  | 2.23762  |
| BC002257  | LOC215866                                                  | 2.45E-09 | 22.55362 |
| BG064871  | Lmyc1,Lmyc-1,AW536278,MGC102165                            | 0        | 19.99707 |
| NM_010723 | Lmo4,Crp3,Etchi4,A730077C12Rik                             | 0.00025  | 2.2507   |
| BB152209  | Lmnb1                                                      | 3.83E-09 | 6.83125  |

|           |                                                             |          |          |
|-----------|-------------------------------------------------------------|----------|----------|
| AV360881  | Litaf,TBX1,C85531,N4WBP3,3222402J11Rik                      | 0.00006  | 2.01829  |
| BB353220  | Lims2,PINCH2                                                | 0.00089  | 5.06415  |
| BC005621  | Lims1,PINCH,Lims11,PINCH1                                   | 0.00004  | 3.9037   |
| AK004806  | Limd1,AW822033,D9Erd192e                                    | 0.00053  | 2.72819  |
| NM_010715 | Lig1,Ligl,mLigl,AL033288                                    | 9.25E-12 | 5.38125  |
| NM_010710 | Lhx2,ap,LH2A,Lh-2,Lim2,apterous                             | 0.00009  | 6.77723  |
| BB309408  | Lhfpl3,A930031L14Rik                                        | 1.17E-14 | 3.83681  |
| BB238390  | Lgtn,D1Erd5e                                                | 0.00015  | 1.71938  |
| NM_011175 | Lgmn,AEP,Prsc1,AI746452,AU022324                            | 1.03E-06 | 1.67185  |
| X16834    | Lgals3,GBP,L-34,gal3,Mac-2                                  | 3.18E-22 | 6.74798  |
| AI642438  | Lgals1,L14,Galbp,L-14.5,Lect14,AA410090,galectin-1          | 2.39E-17 | 5.00771  |
| AV156961  | Leprot,LEPR,VPS55,Obrgrp,MGC6694,OB-RGRP                    | 0.0004   | 2.08711  |
| AV110871  | Ldld3,AI194318,6430500P08                                   | 2.48E-12 | 1.94491  |
| AF030333  | Ldb1,NLI,CLIM2                                              | 0.00044  | 2.65908  |
| NM_008879 | Lcp1,Pls2,AW536232,L-fimbrin,D14Erd310e                     | 0.00045  | 3.7275   |
| X14607    | Lcn2,24p3,NGAL,AW212229                                     | 8.66E-24 | 12.33393 |
| NM_133815 | Lbr,ic,AI505894                                             | 2.04E-34 | 3.36026  |
| C77643    | Lats2,AV277261,AW228608,4932411G09Rik                       | 1.96E-14 | 2.09379  |
| NM_134137 | Lars,AW536573,mKIAA1352,2310045K21Rik,3110009L02Rik         | 0.00001  | 1.8164   |
| BB218107  | Laptm5,E3                                                   | 0.00021  | 4.91919  |
| AK010384  | Lap3,LAP,LAPEP,AA410100,2410015L10Rik                       | 7.23E-12 | 3.43128  |
| BB022070  | L3mbtl3,MBT-1,AI481284,MGC90546                             | 3.79E-06 | 2.44587  |
| NM_029571 | Kti12,AI326810,AU014758,1110001A12Rik                       | 0.00081  | 2.26354  |
| NM_025327 | Krtcap2,Kcp2,0610010112Rik                                  | 0.00002  | 1.81937  |
| BC010202  | Kras,ras,p21B,K-ras,Kras2,Ki-ras,Kras-2,MGC7141,AI929937    | 0.00011  | 1.88106  |
| NM_008379 | Kpnb1,IPOB,Impnb,MGC8315,AA409963                           | 1.41E-07 | 2.47682  |
| NM_010655 | Kpna2,Rch1,IPOA1,MGC91246,2410044B12Rik                     | 1.01E-35 | 4.41747  |
| NM_023294 | Kntc2,HEC,HEC1,AV139730,2610020P18Rik                       | 1.01E-15 | 10.90481 |
| AW536884  | Kntc1,D330012D13                                            | 2.34E-23 | 7.46387  |
| BG073366  | Klhl3,Hnrpa0,1110055B05Rik,3010025E17Rik                    | 2.85E-08 | 2.13838  |
| BM124262  | Klhl24,C85082,1110046J11Rik,4930429H24Rik,6530402O20Rik     | 0.00036  | 1.68446  |
| NM_026167 | Klhl13,Bklhd2,AI451128,mKIAA1309,1200009K10Rik              | 0.00002  | 2.65034  |
| AV230488  | Klf3,Bklf,Tef-2,AL024007,9930027G08Rik                      | 1.25E-14 | 2.1827   |
| BM249597  | Klf12,AP-2rep,AI225908,AI315654,2700063E05Rik,B130052C06Rik | 0.00007  | 2.65231  |
| NM_008446 | Kif4,Kns4,AI323435,D330050K22Rik                            | 1.61E-14 | 9.27771  |
| BB104669  | Kif2c,MCAK,ESTM5,Kns16,X83316,MGC11883,4930402F02Rik        | 0        | 13.52694 |
| AW986176  | Kif23,CHO1,Kns15,MKLP1,C87313,MKLP-1,3110001D19Rik          | 2.05E-21 | 30.02654 |
| BC003427  | Kif22,Kid,C81217,Kif22a,AU021460                            | 4.83E-37 | 17.22318 |
| NM_009004 | Kif20a,AA415432,Rab6kifl                                    | 1.43E-18 | 15.05188 |
| BC016095  | Kif18a,AU024633,MGC27627,B130001M12Rik                      | 1.13E-06 | 4.91759  |
| BB827235  | Kif11,Eg5,Kif8,Kif11,Kns11                                  | 3.12E-26 | 12.28324 |
| BQ174458  | Khsrp,KSRP,6330409F21Rik                                    | 2.39E-10 | 2.76052  |
| AK014353  | Khdrbs3,Etle,SIm2,SLM-2,T-STAR                              | 1.31E-16 | 5.2454   |
| AJ278133  | Kdelr2,1110007A14Rik                                        | 5.17E-22 | 2.688    |
| BM198314  | Kdelc1,EP58,Kdel1,1810049A15Rik,5730416C13Rik               | 6.78E-07 | 2.23689  |
| BB042748  | Kctd4,AU017169,2210017A09Rik                                | 0.00022  | 2.10441  |
| BB091366  | Kctd15,BC031749,MGC25497                                    | 2.53E-10 | 3.33424  |
| BB162318  | Kcnq5,D1Mgi1,AA589396,7730402H11,9230107O05Rik              | 1.24E-13 | 5.24737  |
| BG063584  | Kcnq1,Kcna9,KVLQT1,AW559127                                 | 0.00008  | 1.60704  |
| BI988550  | Kbtbd9,Gm68,mKIAA1921,A230106N14Rik                         | 4.74E-08 | 6.70877  |
| AK012319  | Katna1                                                      | 0.00051  | 1.83095  |



|           |                                                         |          |          |
|-----------|---------------------------------------------------------|----------|----------|
| NM_053092 | Kars,LysRS,AA589550                                     | 2.31E-16 | 1.80193  |
| BE996326  | Josd3,2810003M17Rik,4930553M18Rik,5930426I11Rik         | 0.00012  | 2.70291  |
| AA415022  | Jmjd2a,Jmjd2,MGC28562,mKIAA0677,D4ErtD222e              | 6.42E-06 | 2.4787   |
| BC026605  | Jmjd1a,TGSA,Tsga,Jmjd1,mKIAA0742,1700105C21Rik,         | 9.21E-07 | 2.66223  |
| BM246184  | Jarid1a,RBP2,Rbbp2,C76986,AA409370,MGC11659             | 8.58E-09 | 1.88795  |
| AV359819  | Jag1,Htu,Ser-1,slalom,Serrate-1,Headturner              | 0.00011  | 3.93464  |
| BM248471  | Itsn1,Ese1,itsn,EHSH1,Sh3p17                            | 0.00005  | 6.32818  |
| NM_025922 | Itpa,Itp,AU020102,2010016I08Rik                         | 0.00041  | 1.8681   |
| AA756810  | Iitm1,AA408947,BB081708                                 | 5.11E-06 | 2.46267  |
| NM_008404 | Itgb2,2E6,LAD,Cd18,Lfa1,MF17,LCAMB,AI528527             | 0.00098  | 1.90239  |
| BM120341  | Itgb1,CD29,Fnr,gpIIa,AA409975,AA960159,4633401G24Rik    | 0.00003  | 3.43083  |
| AK003416  | Itgav,CD51,1110004F14Rik,2610028E01Rik                  | 1.32E-06 | 2.09901  |
| BQ175493  | Itga8,AI447669,E030013I19Rik                            | 0.00048  | 3.20409  |
| AK010892  | Isoc1,2610034N03Rik                                     | 4.64E-11 | 4.16564  |
| BB546077  | Isg20I2,C80587,4930429N24                               | 2.86E-17 | 4.74693  |
| BB345784  | Irs1,IRS-1                                              | 0        | 4.31306  |
| BG069095  | Irf8,Myls,ICSBP,IRF-8,lcsbp1,AI893568                   | 0.00008  | 4.42497  |
| BM201500  | Ireb2,Irp2,D9ErtD85e,DKFZp564D1164                      | 1.35E-06 | 3.6351   |
| NM_016721 | Iqgap1,AA682088,mKIAA0051,D7ErtD237e,D7ErtD257e         | 1.23E-25 | 3.26866  |
| BE626727  | Iqcf4,1700042N06Rik                                     | 0.00006  | 3.92361  |
| BB499356  | Ipo9,Imp9,C78347,Ranbp9,mKIAA1192,0710008K06Rik         | 1.08E-16 | 8.10114  |
| AV278060  | Invs,inv,AI428552,AW45512                               | 2.03E-07 | 1.98859  |
| BB468410  | Insm1,IA-1                                              | 1.70E-19 | 29.60631 |
| AW545952  | Ing5,AI225768,1700001C14Rik,1700027H23Rik,1810018M11Rik | 0.00017  | 1.63091  |
| BB020556  | Ing3,P47ING3,1300013A07Rik                              | 0.00069  | 1.62275  |
| BC016573  | Ing1,mING1h,p33Ing1,AA407184,AI875420,2610028J21Rik     | 0.00003  | 2.40514  |
| BI410774  | Incpn,C77457,AU019509,C130081E20,2700067E22Rik          | 0.00002  | 7.05802  |
| M33934    | Impdh2,IMPD                                             | 1.66E-09 | 3.91648  |
| NM_133976 | Imp3,AI256594,1190002L16Rik                             | 5.14E-06 | 1.91866  |
| BC008259  | Immnp1I,AU042386,MGC101970,1500034J20Rik,2610528O17Rik  | 0.00002  | 1.89575  |
| BG069530  | IIf3,NF90,MPHOSPH4                                      | 1.88E-08 | 3.5225   |
| NM_026374 | IIf2,Tex261,Tex267,TEG-267,6230405A16Rik                | 0.00007  | 2.41337  |
| NM_018770 | Igsf4a,BI2,ST17,Igsf4,Necl2,Tslc1,RA175A                | 7.80E-13 | 1.61175  |
| AK019524  | Igsf3,V7,Cd101,Igsf2,                                   | 0.00087  | 2.11985  |
| M94350    | IgI-V1,IgL,1810027O01Rik,immunoglobulin lambda-chain    | 0.00034  | 2.29645  |
| BC013496  | Igk-V21,Ig kappa chain                                  | 6.31E-40 | 19.87172 |
| AV057155  | Igk-C,MGC118128,kappa light chain C_region              | 1.02E-17 | 15.8555  |
| BC006026  | Igj,Jch,AI323815,9530090F24Rik                          | 5.47E-08 | 7.88222  |
| BC019425  | Igh-VJ558,MGC6727,AI893585,MGC118142                    | 7.68E-17 | 20.67341 |
| BM935068  | Igfbp1,IGFBPL,2810011G06Rik,2810453O06Rik               | 2.63E-17 | 28.3456  |
| AI481026  | Igfbp7,Fstl2,mac25                                      | 6.01E-12 | 3.10479  |
| BB787243  | Igfbp4,Deb2,IGFBP-4,AI875747                            | 1.82E-07 | 2.30875  |
| AK011784  | Igfbp2,Igfbp-2,AI255832                                 | 0.00008  | 2.73862  |
| BC010291  | IIfitm3,Fgls,IP15,Cd225,mil-1,Cdw217,1110004C05Rik      | 1.30E-08 | 2.21284  |
| NM_030694 | IIfitm2,mil-3,IIfitm3I,MGC102396,fragilis3              | 8.56E-09 | 4.51824  |
| M74124    | IIfi205,D3,D3cDNA                                       | 8.35E-13 | 9.4274   |
| AI481797  | IIfi202b,IIfi202,IIfbip-1,IIfi202a                      | 0.00037  | 4.90388  |
| BB078200  | Iler5I,2610524G09Rik                                    | 1.74E-06 | 5.35378  |
| BF147705  | Iler5                                                   | 3.92E-44 | 6.52982  |
| NM_008322 | Ildh2,IDPm,Ildh-2,E430004F23                            | 6.26E-27 | 4.28685  |
| NM_010497 | Ildh1,IDPc,Ild-1,Ildh-1,AI314845,AI788952,              | 1.55E-06 | 2.92295  |

|           |                                                    |          |          |
|-----------|----------------------------------------------------|----------|----------|
| NM_019987 | Ick,AI848300,2210420N10Rik                         | 1.04E-07 | 4.81701  |
| NM_008303 | Hspe1,10kDa,mt-cpn10,MGC117526                     | 0.00016  | 1.70766  |
| AI648003  | Hspd1,60kDa,Hsp60                                  | 1.02E-14 | 1.60479  |
| BE912771  | Hspa4,70kDa,APG-2,Hsp110,Hsp70RY                   | 1.49E-12 | 2.08367  |
| NM_008292 | Hsd17b4,MFE-2,Mfp-2,AW208803,perMFE-2,17[b]-HSD    | 0.00013  | 1.92458  |
| BC014753  | Hsd11b2                                            | 0        | 12.74225 |
| BG065273  | Hrmt1I4,Hrmt1I3                                    | 0.00009  | 2.00371  |
| AK010534  | Hrmt1I3,Prmt3,AL033309,2010005E20Rik,2410018A17Rik | 5.73E-07 | 2.48037  |
| AK020120  | Hrmt1I2,Mrmt1,Prmt1,AW214366,6720434D09Rik         | 1.87E-13 | 2.54807  |
| BB357347  | Hrmt1I1,Prmt2,AI504737                             | 1.80E-15 | 1.80327  |
| AF326551  | Hpca                                               | 0.00011  | 4.54938  |
| BC020024  | Hp1bp3,Hp1bp74,MGC28927                            | 1.43E-06 | 1.52321  |
| AB017136  | Homer2,CPD,Vesl-2,Cupidin,AW539445                 | 2.54E-13 | 6.59791  |
| BF228203  | Hnrpu,SAFA,Sp120,C86794,hnRNPU,                    | 1.60E-13 | 2.09516  |
| AW701147  | Hnrpr,hnRNPR,2610003J05Rik                         | 4.03E-19 | 2.10228  |
| AK011521  | Hnrpm,AA409009,KIAA4193,mKIAA4193,2610023M21Rik    | 0.00002  | 2.10442  |
| BC006805  | Hnrpll,PHGPx,AI256697,AI852082,2510028H02Rik       | 1.13E-12 | 1.8165   |
| NM_025279 | Hnrpk,NOVA,hnRNPK,MGC102032                        | 1.34E-13 | 1.7205   |
| NM_021510 | Hnrph1,Hnrph,E430005G16Rik                         | 1.11E-09 | 1.52967  |
| AW412441  | Hnrpf,AA407306,MGC36971,MGC101981,4833420I20Rik    | 6.60E-15 | 3.77236  |
| BB711246  | HnrpdI,JKTBP,AA407431,AA959857,hnRNP-DL            | 1.03E-23 | 1.91743  |
| BC011172  | Hnrpd,Auf1                                         | 0.00016  | 2.26955  |
| NM_016884 | Hnrpc,Hnrnpc,Hnrpc1,Hnrpc2,hnRNPC1                 | 8.10E-16 | 1.90007  |
| NM_010448 | Hnrpab,CBF-A,Cgbfa,3010025C11Rik                   | 1.52E-34 | 4.44889  |
| BC024454  | Hnrpa3,hnRNPA3,                                    | 1.16E-17 | 2.294    |
| BG064117  | Hnrpa2b1,Hnrpa2,hnrnp-A,9130414A06Rik              | 1.94E-09 | 1.70227  |
| BI663320  | Hnrpa1,Hdp,hnrnp-A1                                | 4.13E-18 | 2.78504  |
| AV067695  | Hn1                                                | 0        | 4.9922   |
| AF079222  | Hmmr,CD168,Rhamm,AA386826                          | 2.88E-11 | 6.46805  |
| AV018952  | Hmgn3,TRIP7,HMGN3a,HMGN3b,BB071015                 | 0.00031  | 1.53954  |
| NM_008251 | Hmgn1,Hmg14,HMG-14,MGC103397                       | 1.91E-31 | 3.71707  |
| NM_008253 | Hmgb3,Hmg4,Hmg2a                                   | 0        | 8.52088  |
| X67668    | Hmgb2,Hmg2,HMG-2,C80539,MGC103184                  | 6.17E-30 | 15.84546 |
| BF166000  | Hmgb1,Hmg1,MGC103168,MGC103169                     | 0.00045  | 1.81564  |
| NM_133964 | Hlrc1,AI585913,AL022869,1110033C18Rik              | 0.00057  | 1.59284  |
| NM_013820 | Hk2,HKII,AI642394                                  | 0        | 6.14086  |
| NM_019469 | Hist2h3c1,H3f2,H3-615,BE691662,Hist2h3ca1          | 3.74E-09 | 9.00468  |
| NM_013550 | Hist1h3a                                           | 0.00004  | 2.3254   |
| W91024    | Hist1h2ao                                          | 9.50E-09 | 13.14668 |
| BB295220  | Hirip3,C86302,B130036O03                           | 3.47E-24 | 4.48726  |
| NM_010423 | Hey1,HRT1,Herp2,hesr-1,AI316788,AI414254           | 2.09E-24 | 5.4142   |
| NM_010422 | Hexb                                               | 0.00001  | 2.37833  |
| NM_008234 | Hells,LSH,Lysh,PASG,YFK8,AI323785,E130115I21Rik    | 2.09E-14 | 10.03695 |
| AV256030  | Hectd2,AW212605,4921524L07,A630025O09Rik           | 0.00004  | 2.25155  |
| BG065877  | Hdlbp,AA960365,AI118566,D1ErtD101e,1110005P14Rik   | 8.17E-06 | 1.81133  |
| BB291880  | Hdgrp3,HRP-3,2700022B06Rik                         | 1.24E-07 | 2.0403   |
| C80147    | Hdgf,AI118077,D3ErtD299e                           | 0.00014  | 2.92088  |
| BB750646  | Hdac9,HD9,HD7B,HDRP,                               | 4.56E-06 | 4.42149  |
| AV292968  | Hdac2,YAF1,Yy1bp,mRPD3,D10Wsu179e                  | 0        | 3.79993  |
| NM_008228 | Hdac1,HD1,RPD3,Hdac1-ps,MGC102534,MGC118085        | 3.12E-09 | 1.93698  |
| BC026853  | Hbp1,C86454,BE629963,1700058O05Rik,C330012F01Rik   | 0.00002  | 1.90369  |

|           |                                                           |          |          |
|-----------|-----------------------------------------------------------|----------|----------|
| AK014330  | Hat1,Hat-1,AA536933,2410071B14Rik                         | 3.69E-06 | 2.0901   |
| BI111967  | H3f3a,H3.3A,MGC102150                                     | 3.93E-12 | 2.21778  |
| BC022974  | H2-Ke2,Ke-2,H-2Ke2                                        | 6.23E-08 | 1.62127  |
| S70184    | H2-K1,H-2K,H2-K,MHC I                                     | 0.0001   | 7.19297  |
| AF119253  | H2-Ea,Ia3,Ia-3,H-2Ea,AI323765,E-alpha-f,MGC117888         | 1.75E-11 | 9.96818  |
| BC011306  | H2-D1,H-2D,H2-D,MHC B7.2                                  | 3.91E-08 | 2.91341  |
| AY074806  | H2afz,H2A.Z                                               | 0        | 3.09075  |
| AF171080  | H2afy,mH2a1,H2AF12M,macroH2A1                             | 2.35E-09 | 2.54196  |
| BC028539  | H2afv,H2av,C530002L11Rik                                  | 0        | 3.89101  |
| BF661121  | H2afj,MGC118637,E130307C13                                | 2.35E-07 | 2.24901  |
| AV018723  | H2-Aa,Ia1,Ia-1,H-2Aa,Aalpha,IAalpha                       | 9.43E-15 | 8.30433  |
| BC003830  | H1f0,H1fv,H1(0),MGC19309,MGC98218,MGC117919,D130017D06Rik | 2.66E-25 | 2.08192  |
| NM_010376 | H13,Spp                                                   | 0.00053  | 2.11872  |
| BM243571  | Gvin1,VLIG,ligs1,VLIG-1,9130002C22Rik,9830104F22Rik       | 0.00073  | 2.76328  |
| NM_010368 | Gusb,g,Gur,Gus,Gut,asd,Gus-r,Gus-s,Gus-t,Gus-u,AI747421   | 0.00005  | 2.70149  |
| NM_013882 | Gtse1,B99,Gtse-1                                          | 0.00055  | 4.79081  |
| AV221508  | Gtf3c4,AI426938,AU014771,AU017413,5330400C03              | 0.00038  | 1.93386  |
| AV297256  | Gtf3c2,AI225816,AU041069,TFIIIC110,mKIAA0011,             | 0.00019  | 1.53912  |
| BM940130  | Gtf2h5,D17Wsu155e,2700017P07Rik,2810432H05Rik             | 9.58E-06 | 1.567    |
| NM_026584 | Gtf2e2,34kDa,AI462509,C330006J08Rik                       | 2.68E-08 | 2.05248  |
| AK011543  | Gtf2e1,FE,56kDa,TFIIE-A,AI303800,2610024P03Rik            | 0.00027  | 1.83401  |
| BG075741  | Gtf2a2,12kDa,Tfllg                                        | 3.60E-06 | 2.29283  |
| AB003502  | Gspt1,G1st,Gst-1,                                         | 7.75E-07 | 2.47316  |
| BG063622  | Gsk3b,GSK3,GSK-3,C86142,GSK-3beta,7330414F15Rik,          | 0.00086  | 2.13779  |
| BE457839  | Gsg2,Haspin                                               | 1.18E-06 | 3.23542  |
| BB000455  | Gm,epithelin                                              | 0.00071  | 2.62274  |
| AW556947  | Grif1,AI841135,KIAA1722,mKIAA1722,6430596G11Rik           | 0.00022  | 2.02864  |
| NM_013536 | Grcc2f,C2f                                                | 1.84E-10 | 1.96059  |
| NM_013535 | Grcc10,C10,2310033H05Rik                                  | 0.00002  | 1.74661  |
| BC021308  | Gpsm2,Pins,6230410J09Rik                                  | 5.13E-19 | 10.18143 |
| BB461269  | Gprk6,GRK6                                                | 9.29E-07 | 2.21003  |
| BC026975  | Gpr85,2900026B03Rik,DKFZp761L08121                        | 2.91E-10 | 1.61619  |
| BF159976  | Gpr56,Cyt28,TM7LN4,TM7XN1                                 | 0.00027  | 4.51471  |
| BB259283  | Gpr27                                                     | 0.00008  | 2.23431  |
| BG073622  | Gpr161,Gm208,Gm208Gpr                                     | 3.47E-07 | 4.86025  |
| AK004377  | Gpr153,PGR1,AI449320,1110065N12Rik                        | 0.00075  | 6.05757  |
| BC019649  | Gpr125,AU044632,3830613O22Rik                             | 1.12E-18 | 6.53804  |
| NM_053110 | Gpnmb,ipd,Dchil                                           | 1.20E-06 | 10.79029 |
| BM203355  | Gpiap1,P137,Gpiap,AL022980,MMGPIP137                      | 0.00003  | 2.11745  |
| BF021177  | Gnl3,Ns,C77032,BC037996,MGC46970                          | 3.09E-13 | 1.98944  |
| BC002316  | Gng5,G(y)5                                                | 1.70E-08 | 1.96653  |
| BB522409  | Gng2,82,1110003P13Rik                                     | 0.00001  | 9.71844  |
| NM_025278 | Gng12,AA536815,AI115529,AI314170,AI842738,2010305F15Rik   | 1.12E-06 | 3.15132  |
| NM_025277 | Gng10,AV006524                                            | 1.37E-08 | 2.52165  |
| BM210111  | Gnb2l1,p205,Rack1,GB-like,Gnb2-rs1                        | 2.64E-37 | 2.96508  |
| BG069873  | Gnb1l,Wdr14,Wdvcl,ESTM55                                  | 0.00005  | 6.46631  |
| NM_008142 | Gnb1,Gnb-1,C77571,AA409223,MGC98074                       | 1.85E-06 | 2.18568  |
| BM207342  | Gnai3,Gnai-3,AI158965,AW537698                            | 4.57E-06 | 2.21748  |
| BF302166  | Gna12,AI414047,AI504261,Galpha12                          | 0.00018  | 5.85774  |
| AW553616  | Gmps,AA591640,AI047208                                    | 1.75E-13 | 2.99925  |
| NM_020567 | Gmnn,Gem,AW546347                                         | 6.35E-20 | 6.32065  |

|           |                                                             |          |          |
|-----------|-------------------------------------------------------------|----------|----------|
| AA839814  | Gm237,MGC67243,MGC73511                                     | 1.05E-09 | 2.97235  |
| AI449447  | Gm1805,Gm407,Gm721,MGC102209                                | 0.00031  | 2.47405  |
| AK010388  | Glt8d1,AI450005,2410004H05Rik,5430414N14Rik                 | 4.12E-09 | 1.50206  |
| NM_031184 | Glis2,Nkl,Gli5,Klf16,MGC36775                               | 0.00051  | 2.42083  |
| AW546128  | Gli2,AW546128                                               | 2.13E-14 | 8.88852  |
| NM_010296 | Gli1,Zfp5,Zfp-5,AV235269                                    | 6.43E-10 | 5.42342  |
| BB272589  | Glce,Hsepi,AI747411,1110017N23Rik,C130034A12Rik             | 0.00013  | 3.28742  |
| AA152997  | Glcci1,Gig18,Tssn1,2310047L21Rik,A130036A18Rik              | 0.00029  | 2.06434  |
| AV148957  | Gja7,Cx45,Cnx45,Gja-7,C130009G16Rik                         | 6.06E-20 | 15.55418 |
| BB760902  | Git2,KIAA0148,mKIAA0148,1500036H07Rik                       | 7.64E-08 | 1.83638  |
| BB493888  | Gga2,mKIAA1080,1200007E24Rik                                | 0.00094  | 1.83     |
| BB750040  | Gfap,AI836096                                               | 1.75E-06 | 2.62798  |
| BC025157  | Gemin6,2610019B15Rik,2810470M17Rik                          | 2.11E-07 | 3.18709  |
| AK016023  | Gdpd1,RP23-352L3.1,2610020H15Rik                            | 0.00009  | 1.51461  |
| NM_020619 | Gcs1,AI181835,1810017N02Rik                                 | 0.00077  | 2.69724  |
| AW547050  | Gas5,Gas-5,MGC6251                                          | 2.89E-09 | 4.08297  |
| BE199211  | Gas2l3,Gm240,8430435B07Rik                                  | 3.88E-15 | 8.43177  |
| BB667193  | Gas2,Gas-2                                                  | 0.00003  | 2.53325  |
| BB550400  | Gas1,Gas-1,AW554192                                         | 0.00004  | 2.57843  |
| NM_010256 | Gart,Gaps,Prgs                                              | 4.95E-10 | 2.37497  |
| BC021747  | Gars,Sgrp23                                                 | 1.37E-34 | 1.64497  |
| BM123170  | Gapvd1,AW108497,KIAA1521,mKIAA1521                          | 0.00001  | 1.51587  |
| AF348968  | Galnt2,AI480629                                             | 0.00054  | 2.7277   |
| BB458578  | Galnt1                                                      | 0.00036  | 1.60323  |
| U58494    | Gag                                                         | 0.00001  | 2.61159  |
| NM_008065 | Gabpa                                                       | 0.00025  | 1.84661  |
| NM_021356 | Gab1,AA408973,AW107238                                      | 0.00017  | 1.98442  |
| BB801060  | G630064H08Rik,AI427432,2900024M11Rik                        | 0.00002  | 3.44872  |
| BC021156  | G3bp,C87777,AI849976,KIAA4115                               | 1.19E-23 | 3.366    |
| NM_008057 | Fzd7,Fz7                                                    | 1.20E-23 | 2.55535  |
| AU020229  | Fzd3,Fz3,AU020229                                           | 0.00075  | 2.6841   |
| BB371406  | Fzd2,Fzd10,Mfz10,Mfz10a,AW456835                            | 2.73E-13 | 9.41024  |
| AB032010  | Fxyd6,Php,061003018Rik                                      | 0.00058  | 1.83597  |
| AV007132  | Fxn,FA,X25,FARR,Frda                                        | 2.47E-10 | 3.68155  |
| BE824668  | Fusip1,Nssr,TASR,NSSR1,NSSR2,TASR1,TASR2,FUSIP2,SRrp40      | 0.00006  | 3.13077  |
| AW108203  | Fubp1,FBP,Fubp,Fubp4,D3ErtD330e,9530027K12Rik               | 1.31E-10 | 3.24414  |
| NM_008049 | Ftl2,Ftl,Ftl-2                                              | 2.23E-16 | 2.65834  |
| NM_010240 | Ftl1,Ftl,Ftl-1,MGC102130,MGC102131,MGC118079,MGC118080      | 4.25E-20 | 2.78171  |
| BI452727  | Fstl1,Fstl,TSC-36,AI316791,AW107808                         | 8.68E-11 | 4.56454  |
| BB258991  | Fshprh1,AI504163,MGC40943                                   | 2.12E-07 | 11.53993 |
| NM_007984 | Fscn1,Fan1,AI663989                                         | 6.29E-17 | 6.17611  |
| AF327857  | Frmd4b,GRSP1,C87375,GOBLIN,R74720,mKIAA1013,6030440G05Rik   | 0.00004  | 8.34361  |
| BB701578  | Frmd4a,FRMD4,AI594879,mKIAA1294,5330420J21                  | 4.27E-23 | 5.24986  |
| BB099015  | Frmd3,4.1O,P410,EPB41L4O,9430066I12Rik                      | 0.00004  | 3.32815  |
| BB490576  | Foxp2,CAG-16,D0Kist7,AI449000,2810043D05Rik                 | 4.76E-09 | 6.38865  |
| NM_008021 | Foxm1,WIN,Mpm2,Fkh16,Foxm1b,HFH-11B,Trident,AW554517,MPHOSP | 7.72E-08 | 4.54408  |
| NM_010225 | Foxf2,LUN,Fkh20,FREAC2                                      | 6.15E-07 | 2.80559  |
| BM245170  | Fosl2,Fra-2                                                 | 3.08E-06 | 3.16775  |
| BG064340  | Fnbp3,FBP11,Fnbp11,2810012K09Rik                            | 7.65E-10 | 3.35447  |
| AW548221  | Fnbp11,TOCA1,AW548221,MGC30506,2610318I01Rik                | 2.46E-26 | 4.75695  |
| BG075699  | Flrt2                                                       | 2.49E-11 | 3.42768  |

|           |                                                           |          |          |
|-----------|-----------------------------------------------------------|----------|----------|
| BM233746  | Flna,Fln1,ABP-280,F730004A14Rik                           | 0.00002  | 3.09938  |
| NM_013902 | Fkbp3,25kDa,FKBP25                                        | 0.00008  | 1.67201  |
| NM_021891 | Fign1                                                     | 3.15E-17 | 17.21741 |
| NM_007999 | Fen1,AW538437                                             | 5.65E-10 | 5.23928  |
| NM_010188 | Fcgr3,CD16                                                | 4.88E-06 | 7.10885  |
| BM224327  | Fcgr2b,CD32,Fcgr2,Fcr-2,Fcr-3,Ly-17,LyM-1,Lym-1           | 0.00047  | 4.71816  |
| NM_010185 | Fcer1g,CD23,Fce1g,Ly-50,FcR[g],AI573376,FcR-gamma         | 0.00005  | 5.65429  |
| AK011820  | Fbxo5,Emi1,C85305,Fbxo31,2510044I10Rik                    | 2.54E-25 | 8.56278  |
| AF441120  | Fbxo32,MAFbx,AI430017,ATROGIN1,atrogin-1,4833442G10Rik    | 1.51E-12 | 3.993    |
| AK006369  | Fbxo30,1700026A16Rik                                      | 1.28E-07 | 2.35015  |
| NM_007991 | Fbl,FIB,FLRN,RNU3IP1,AL022665                             | 3.46E-14 | 5.5599   |
| BG070186  | Fancd2,FA4,FAD,FACD,FA-D2,FANCD,AU015151,BB137857         | 0.00005  | 3.77065  |
| NM_016925 | Fanca,AW208693,D8ErtD106e                                 | 8.19E-08 | 2.05439  |
| BC002008  | Fabp5,Klbp,mal1                                           | 2.35E-36 | 5.53201  |
| BB248804  | F730047E07Rik,Gm134                                       | 0.00006  | 5.42924  |
| AV024285  | F2r,Cf2r,Par1,ThrR,AI482343,MGC28086                      | 0        | 7.80016  |
| NM_007971 | Ezh2,Enx-1,Enx1h,KIAA4065,MGC90723,mKIAA4065              | 3.62E-39 | 8.352    |
| AK009584  | Exosc8,CIP3,KIAA4013,mKIAA4013,2310032N20Rik              | 8.27E-08 | 2.84658  |
| BC024423  | Exosc1,AI447561,2610035C18Rik,2610104C07Rik,2610312F07Rik | 8.02E-06 | 2.74954  |
| AV025913  | Exoc5,Gm76,SEC10,PRO1912,Sec10I1,AI447711,AI448003        | 0.00097  | 1.62245  |
| BB203232  | Exoc4,Sec8,C78892,Sec8I1                                  | 0.00005  | 1.9805   |
| BE986864  | Exo1,Msa                                                  | 6.95E-19 | 7.69612  |
| BB699868  | Ewsr1,Ews,Ewsh,AU018891                                   | 8.24E-17 | 1.71787  |
| AW546029  | Evl,AI528774                                              | 0.00013  | 2.14444  |
| NM_021292 | Evc                                                       | 0.00034  | 3.7441   |
| BM218086  | Etv6,Tel,AW123102,AW557856                                | 0.00005  | 3.28108  |
| BC013717  | Etf1,ERF,ERF1,TB3-1,SUP45L1,AI463371,MGC18745             | 0.00083  | 2.32344  |
| BM200578  | Espl1,SSE,ESP1,PRCE,AL024103,AU045071                     | 5.96E-08 | 12.9538  |
| NM_016903 | Esd,Es10,Es-10,sid478                                     | 0.00002  | 1.738    |
| AK010391  | Esco2,2410004I17Rik,D030072L07Rik                         | 1.37E-13 | 17.32096 |
| BB071632  | Erh,Mer,Prei1,MGC103398,MGC130271,MGC130272               | 3.57E-38 | 4.85331  |
| BC004701  | Ercc6l,MGC7766,BC004701,D330021P09Rik                     | 9.46E-10 | 9.19093  |
| BB815240  | Ercc1,Ercc-1                                              | 0.00037  | 3.64909  |
| BM240030  | Erbp2ip,Erbin,mKIAA1225,1700028E05Rik                     | 1.80E-07 | 6.63183  |
| BM238943  | Eprs,Qprs,C79379,2410081F06Rik,3010002K18Rik              | 2.72E-08 | 1.66647  |
| BE553881  | Epha5,bsk,Cek7,Ehk1,Els1,Hek7,Rek7,AI854630               | 6.56E-33 | 3.97349  |
| BB254042  | Epb4.1l2,4.1G,NBL2,AW555191,D10ErtD398e                   | 0.00046  | 2.53341  |
| AI595744  | Eny2,DC6,Ey2,6720481I12,1810057B09Rik                     | 0.00001  | 2.12092  |
| BM120053  | Enc1,Nrpb,PIG10                                           | 0.00002  | 3.25037  |
| U66888    | Emr1,Ly71,F4/80,Gpf480,TM7LN3,DD7A5-7,EGF-TM7             | 0.00023  | 1.83995  |
| BB359162  | Eml4,AI644019,MGC90779,4930443C24Rik                      | 3.28E-11 | 4.80081  |
| BG064903  | Eme1,MGC106543,6820428D13                                 | 0.00003  | 5.43077  |
| NM_007927 | Emd,AW550900                                              | 0.00037  | 1.87419  |
| NM_023876 | Elp4,Paxneb,A330107A17Rik                                 | 0.00096  | 1.80473  |
| AW146130  | Elk4,Sap1,BB162516,2310011G17Rik,A130026I01Rik            | 0.00029  | 2.75264  |
| BB105998  | Elavl2,Hub,mel-N1                                         | 2.33E-07 | 3.12023  |
| AK011870  | Elavl1,HUR,Hua,W91709,2410055N02Rik                       | 1.46E-07 | 2.88039  |
| BC024899  | Eif5a,Eif4d,MGC6725,AA410058,D19Wsu54e                    | 4.90E-06 | 1.72886  |
| NM_013507 | Eif4g2,p97,Nat1,DAP-5,Natm1                               | 1.25E-23 | 1.89114  |
| NM_007918 | Eif4ebp1,PHAS-I,AA959816                                  | 0.00001  | 5.88835  |
| BM120823  | Eif4e2,Eif4e13,AI036339,AV129531,D0H0S6743E,2700069E09Rik | 1.71E-09 | 3.98726  |

|           |                                                          |          |          |
|-----------|----------------------------------------------------------|----------|----------|
| AK010644  | Eif4a1,Eif4,Ddx2a,BM-010                                 | 4.83E-16 | 3.01068  |
| BG923834  | Eif3s9,PRT1,AL033316,AL033334,AW208965                   | 0.00006  | 2.49515  |
| AV235349  | Eif3s8,110kDa,NipilA3,MGC36637,NIPIL(A3),3230401O13Rik   | 3.64E-07 | 1.70666  |
| BC024463  | Eif3s6ip,PAF67,HSP-66Y,MGC37328,0610011H21Rik            | 1.20E-09 | 2.33474  |
| AK002576  | Eif3s6,Int6,48kDa,eIF3e,eIF3-p46,eIF3-p48                | 3.63E-08 | 1.87301  |
| BC008511  | Eif3s4,p44,44kDa,D0Jmb4,TU-189B2,eIF3-p44                | 0.00064  | 1.66593  |
| NM_018799 | Eif3s2,36kDa,Trip1,D4Erttd632e                           | 1.78E-17 | 1.7629   |
| BI904160  | Eif3s12,eIF3K,1200009C21Rik                              | 0.00017  | 1.75341  |
| AW701127  | Eif3s10,Csma,Eif3,mKIAA0139,A830012B05Rik                | 2.23E-17 | 1.51403  |
| BQ175028  | Eif2s1,35kDa,Eif2a,eIF2alpha,0910001O23Rik,2410026C18Rik | 0.00025  | 1.74985  |
| NM_025437 | Eif1ay,AI426898,1500010B24Rik                            | 8.38E-17 | 2.46686  |
| BM200591  | Eif1a,Ef1a,Eftu,Eif4c,C76390,eIF-1A                      | 1.08E-06 | 2.17189  |
| BB409568  | Ehmt1,mKIAA1876,D330003E03,EU-HMTase1,9230102N17Rik      | 0.00082  | 1.70414  |
| AV369812  | Egfr,Wa5,wa2,Erbb,Errp,wa-2,AI552599,9030024J15Rik       | 2.36E-18 | 7.45761  |
| NM_010112 | Efs                                                      | 4.50E-17 | 4.49153  |
| BB790825  | Efna2,Epl6,Elf-1,Cek7-L,LERK-6,Ephrin-A2                 | 0.00043  | 4.1345   |
| BC007152  | Eef2,Ef-2,MGC98463                                       | 0.00018  | 1.70867  |
| AF321126  | Eef1g,EF1G,AA407312,MGC103354,2610301D06Rik              | 0.00003  | 1.99208  |
| AV104363  | Eef1d,AL023999,1700026P12Rik,5730529A16Rik               | 1.95E-38 | 2.01298  |
| NM_018796 | Eef1b2,Eef1b,2810017J07Rik                               | 7.75E-33 | 2.24864  |
| AV238324  | Edg3,LPb3,S1P3,AI132464                                  | 2.34E-08 | 6.3695   |
| BG064496  | Edem1,EDEM,mKIAA0212,A130059K23Rik                       | 0.00018  | 3.95252  |
| AV246296  | Eda2r,Xedar,TNFRSF27,MGC124099,9430060M22Rik             | 4.31E-25 | 20.71996 |
| NM_007900 | Ect2,AI528536,KIAA4037,mKIAA4037                         | 6.10E-31 | 18.25629 |
| AK007491  | Ebna1bp2,p40,Ebp2,Nobp,                                  | 0.00003  | 1.80531  |
| AK014058  | Ebf3,O/E-2,KIAA4201,mKIAA4201,3110018A08Rik              | 0        | 9.88853  |
| AI049170  | Ebf1,Ebf,Olf1,O/E-1,Olf-1,AW990631,9830166E18Rik         | 4.48E-11 | 8.95031  |
| BM932622  | Eaf1,AI666536,4933403C17Rik                              | 3.24E-06 | 1.98104  |
| BE648090  | E430025E21Rik,C76463,AL022848,MGC31278,mKIAA0196         | 0.00002  | 1.76469  |
| BB556624  | E330024J20Rik                                            | 5.96E-08 | 4.4021   |
| BM247465  | E2f8,AA410048,4432406C08Rik                              | 0.00018  | 5.51017  |
| BG069355  | E2f7,D10Erttd739e,A630014C11Rik                          | 1.76E-11 | 5.75855  |
| BQ176318  | E2f3,E2F3b,E2f3a,mKIAA0075                               | 9.27E-09 | 3.03351  |
| BB543028  | E2f2,E130207A07                                          | 2.56E-07 | 9.3604   |
| AK017841  | E2f1,E2F-1,KIAA4009,mKIAA4009                            | 1.01E-07 | 3.74214  |
| BM226118  | E130306D19Rik                                            | 0.00003  | 3.94044  |
| BF464487  | E130114P18Rik                                            | 2.11E-15 | 8.14775  |
| AU015377  | E130105L11Rik,AA589388                                   | 0.00006  | 1.59823  |
| AV256780  | E130014H08Rik,A130096K20                                 | 0.00006  | 2.70645  |
| AK007736  | Dyrk2,1810038L18Rik                                      | 3.84E-11 | 5.36499  |
| BG093881  | Dynlt1,Tctex1,Tctex-1,MGC107111                          | 9.65E-17 | 2.94164  |
| NM_019682 | Dynll1,Pin,DLC8,Dncl1                                    | 1.31E-17 | 2.36036  |
| AF091101  | Dut,Dutp,dUTPase,D2Bwg0749e,5031412I06Rik,5133400F09Rik  | 0        | 3.59771  |
| BE951717  | Dusp11,AI481497,2010300F21Rik                            | 0.00002  | 1.62936  |
| NM_023136 | Dtymk,Tmk,CDC8,TMPK,TYPK,mtmk,AU044245,D10Erttd203e      | 8.53E-13 | 5.90937  |
| AK012919  | Dtl,Ramp,2810047L02Rik,5730564G15Rik                     | 5.07E-15 | 12.94339 |
| NM_053090 | Drctnb1a                                                 | 4.17E-07 | 3.20612  |
| BB821609  | Drbp1,Drb1,G430095G15Rik                                 | 0.00047  | 1.83416  |
| NM_011993 | Dpysl4,DPY4,Crmp3,Drp-4,Ulip4,CRMP-3,AI173505            | 0.00001  | 1.68598  |
| NM_009468 | Dpysl3,TUC4,Ulip,Ulip1,CRMP-4                            | 6.66E-16 | 7.56318  |
| BM119324  | Dpy19I,AI225861,AW558481,6030402K12,1100001I19Rik        | 0.00056  | 1.7186   |

|           |                                                             |          |          |
|-----------|-------------------------------------------------------------|----------|----------|
| BQ174742  | Donson,ORF60,AI845729,1110025J21Rik                         | 0.00006  | 1.70557  |
| NM_026082 | Dock7,Gm430,mKIAA1771,3110056M06Rik                         | 0.00008  | 1.86677  |
| AK017170  | Dock11,sph238,Zizimin2,8030476J24,5033414A21Rik             | 1.96E-24 | 6.36485  |
| BB292932  | Dock1,AI854900,9130006G06Rik,D630004B07Rik                  | 6.03E-09 | 11.0651  |
| BB543070  | Doc2a                                                       | 2.96E-06 | 6.21979  |
| BB116018  | Dnmt1,Dnmt,Met1,Cxhc9,MTase,Met-1,Dnmt1o                    | 2.58E-12 | 4.96898  |
| BM942465  | Dnajc9,AU020082,5330419I01Rik                               | 1.70E-17 | 2.61756  |
| BG067003  | Dnajc2,Zrf1,Zrf2,MIDA1,AU020218                             | 9.06E-08 | 2.93283  |
| C87112    | Dnajc17,C87112,D9Bwg1371e,1700025B16Rik                     | 1.53E-06 | 2.19754  |
| BB546985  | Dna2l,mKIAA0083,E130315B21Rik                               | 4.33E-14 | 3.35441  |
| BM250919  | Dlg7,Hurp,C77459,C86398,mKIAA0008                           | 1.11E-07 | 7.0552   |
| BM238212  | Diap3,Dia2,mDia2,KIAA4117,mKIAA4117,p134MDia2,4930417P13Rik | 5.79E-06 | 5.29024  |
| NM_023232 | Diablo,Smac,AU040403,0610041G12Rik                          | 0.00012  | 2.06033  |
| U91922    | Dhx9,RHA,Ddx9,NDHII,NDH II,AI326842,MGC90954                | 1.69E-07 | 2.49617  |
| AK010512  | Dhx40,PAD,DDX40,ARG147,2410016C14Rik                        | 0.00009  | 2.23748  |
| BC003745  | Dhx15,DBP1,HRH2,Ddx15,mDEAH9,MGC117685                      | 1.22E-11 | 1.57582  |
| NM_010049 | Dhfr,AI662710,AW555094,8430436I03Rik                        | 9.12E-10 | 3.92097  |
| BC016218  | Dera,DEOC,2010002D22Rik,2500002K03Rik                       | 0.00018  | 2.27557  |
| BB136172  | Depdc1b,XTP1,AW260467,9830132O03                            | 4.13E-11 | 5.72894  |
| BC005799  | Depdc1a,Depdc1,5830484J08Rik                                | 2.24E-07 | 6.93909  |
| AV260555  | Dennd2a,mKIAA1277,C130031G22,B930096L08Rik                  | 5.39E-09 | 11.98011 |
| AK007546  | Dek,D13H6S231E,1810019E15Rik                                | 2.41E-11 | 2.14373  |
| NM_007850 | Defcr3,Defcr-3                                              | 0.00061  | 2.77687  |
| BC011308  | Ddx41,ABS,AA958953,AI324246,2900024F02Rik                   | 0.0004   | 3.9546   |
| AV214253  | Ddx39,BAT1,DDXL,URH49,2610307C23Rik                         | 1.58E-21 | 3.80828  |
| BM246099  | Ddx21,AI255159,AL022742,D10Wsu42e,D10ErtD645e               | 0.00002  | 4.31387  |
| NM_025860 | Ddx18,MGC117904,2310005B10Rik                               | 2.08E-10 | 2.15086  |
| NM_016765 | Ddah2,G6a,Ddah,NG30,AU019324,AW413173,1110003M04Rik         | 6.23E-21 | 9.0563   |
| BB418548  | Dcx,Dbct                                                    | 1.43E-24 | 29.65273 |
| BE630687  | Dck                                                         | 0.0001   | 3.70314  |
| BE824778  | Dcc                                                         | 0        | 24.24271 |
| BB757120  | Dcamkl1,DCLK,Cpg16,mKIAA0369,1700113D08Rik,2810480F11Rik    | 4.21E-09 | 2.4358   |
| AB064321  | Dbn1                                                        | 0.00086  | 4.84467  |
| NM_013726 | Dbf4,Ask,AA545217                                           | 6.15E-20 | 18.40088 |
| NM_133188 | Dazap1,mPrp,2410042M16Rik                                   | 5.90E-07 | 2.70892  |
| BC026671  | Dapk1,AI642003,D13Ucla1,DAP-Kinase                          | 0.00013  | 3.21373  |
| BQ175713  | D930050A07Rik                                               | 2.54E-28 | 2.75948  |
| BM234701  | D930015E06Rik,mKIAA0922                                     | 0.00087  | 6.88492  |
| C77595    | D8ErtD51e                                                   | 8.47E-09 | 6.07144  |
| BG068420  | D8ErtD457e,AI116001,mKIAA1802,D8ErtD569e                    | 0.00022  | 1.88255  |
| AV328498  | D7ErtD715e,AU018661                                         | 0.00087  | 2.14897  |
| BB230617  | D5ErtD798e                                                  | 0.00008  | 1.9689   |
| AU015121  | Cyclin B1                                                   | 8.59E-21 | 41.36861 |
| AV110855  | D4ErtD429e                                                  | 3.19E-16 | 1.93367  |
| BM203518  | D4ErtD22e,1110022I03                                        | 0.00004  | 2.25251  |
| BM116882  | D430019H16Rik,AI852661                                      | 5.62E-06 | 7.88711  |
| BF321707  | D3Wsu161e                                                   | 0.00009  | 2.46654  |
| BF658806  | D3Ucla1,RAMP4,Serp1                                         | 0.00085  | 2.06168  |
| BE989344  | D3ErtD330e                                                  | 1.38E-07 | 2.28306  |
| AK012148  | D2ErtD750e,C15orf23,1700025D04Rik                           | 3.57E-11 | 6.05854  |
| BM115569  | D230012E17Rik,Pgap1,A530084K22,5033403E17Rik,9030223K07Rik  | 0.00017  | 1.79431  |

|           |                                                            |          |          |
|-----------|------------------------------------------------------------|----------|----------|
| BG918881  | D1Bwg0212e,C40,2410015L18Rik                               | 7.28E-08 | 1.70921  |
| BG918834  | D19Ert409e                                                 | 0.00004  | 1.86775  |
| AI314709  | D19Bwg1357e,AA675048,KIAA0020,1110069H02Rik                | 0.00026  | 2.19975  |
| NM_033075 | D17H6S56E-5,G7e                                            | 1.57E-16 | 11.40566 |
| AV116987  | D17Ert441e,Hn11,AL022629,AY358078,C16orf34,2810430B18Rik   | 1.48E-13 | 4.90268  |
| AK009258  | D16Ert472e,AI256766,AW536354,                              | 1.89E-06 | 2.8694   |
| AV227727  | D16Bwg1543e,AW546090,5730448P06Rik                         | 0.00012  | 1.76803  |
| C81400    | D15Ert4366e,Eplin,1110021C24Rik,3526402A12Rik              | 0.00004  | 4.61039  |
| BG072279  | D14Ert449e,AA960404,0610008K04Rik,0610010A22Rik            | 1.33E-07 | 6.26615  |
| AV304373  | D14Ert231e,BC028953                                        | 0.00063  | 2.25263  |
| NM_138596 | D13Wsu50e,C78613,AA959813,AI385605                         | 0.00041  | 1.5254   |
| AK013251  | D13Wsu177e,AA409471                                        | 5.46E-14 | 2.96492  |
| BB530158  | D130064H19Rik,AU015422,MGC117989,5730509D14                | 1.54E-12 | 2.00329  |
| BB456871  | D130016B08Rik                                              | 3.10E-07 | 1.68795  |
| AV025581  | D10Wsu102e,AI747614,C430041I18Rik                          | 0.00007  | 1.74956  |
| BB256746  | D030056L22Rik                                              | 0.00017  | 1.67522  |
| BI083036  | D030034H08                                                 | 0.00096  | 2.23197  |
| NM_018887 | Cyp39a1                                                    | 0.00006  | 2.90717  |
| C87524    | Cyp11a1,Scs,Cyp11a,Cyp11a,P450scc,D9Ert411e                | 3.38E-10 | 17.34288 |
| AV373944  | Cybb,Cgd,Nox2,C88302,gp91phox,gp91<phox>                   | 9.81E-08 | 4.0277   |
| AK018713  | Cyba,b558                                                  | 5.09E-10 | 12.27645 |
| D87747    | Cxcr4,CD184,LESTR,Cmkr4,PB-CKR,PBSF/SDF-1                  | 1.95E-27 | 10.51973 |
| BE824924  | Cxadr,CAR,MCAR,AU016810,AW553441,2610206D03Rik             | 1.25E-12 | 3.49467  |
| BC012653  | Cx3cr1                                                     | 6.47E-06 | 5.12988  |
| AK014327  | Cwf19l2,9030209E10,3230401L03Rik                           | 0.00081  | 2.09522  |
| BE979587  | Cugbp2,ETR-3,Napor,C88023,Napor-2,B230345P09Rik            | 5.26E-07 | 6.46297  |
| BI155559  | Ctxn1,Ctxn,BC028881,MGC25920                               | 1.92E-07 | 8.03919  |
| BB231897  | Cttnbp2nl                                                  | 2.31E-06 | 1.74579  |
| AW488544  | Cttnbp2,ORF4,Cortbp2,mKIAA1758,6430526E05,4732477G22Rik    | 7.78E-06 | 2.82534  |
| NM_022325 | Ctsz,CTSX,AI787083,AU019819,D2Wsu143e                      | 1.44E-15 | 4.76377  |
| NM_021281 | Ctss                                                       | 1.13E-13 | 4.17524  |
| BB542535  | Ctsh,AL022844                                              | 1.47E-07 | 6.494    |
| NM_009983 | Ctsd,CD,CatD                                               | 5.06E-15 | 2.96913  |
| NM_009982 | Ctsc,DPP1,DPPI,AI047818                                    | 1.47E-19 | 7.18268  |
| AU019852  | Ctsb                                                       | 0.00005  | 2.27028  |
| NM_016748 | Ctps                                                       | 7.15E-21 | 4.3421   |
| NM_025680 | Ctnnb1,NAP,P14L,FLJ21108,NYD-SP19,5730471K09Rik            | 9.94E-10 | 2.91022  |
| BC003241  | Cstf3,C79532,MGC6373,4732468G05Rik                         | 7.81E-08 | 2.25654  |
| NM_007792 | Csrp2,Crp2,SmLim,AW551867                                  | 8.02E-22 | 7.46299  |
| AW553463  | Cspp1,BC055915                                             | 1.99E-06 | 1.96861  |
| BM939365  | Cspg3,Ncan,Tgfbt,neurocan,C230035B04                       | 5.10E-11 | 6.64567  |
| NM_023565 | Cse1l,Cas,Xpo2,Capts,AA407533,2610100P18Rik                | 0.00001  | 1.70201  |
| AV216648  | Csda,Yb2,Dpba,MSY4,Ybx3,dbpA,oxyR                          | 7.30E-15 | 9.83944  |
| AV143435  | Crnk1,crn,C80326,1200013P10Rik                             | 0.00005  | 1.72832  |
| AB006714  | Crmp1,DRP-1,Ulip3,Dpysl1                                   | 2.47E-06 | 2.96029  |
| AW060274  | Crebbp,CBP,AW558298                                        | 0.00058  | 1.73903  |
| AK014391  | Creb1,Creb,Creb-1,AV083133,2310001E10Rik,3526402H21Rik     | 0.00007  | 1.89722  |
| BB425379  | Cpsf6,CFIM,CFIM68,AI256641,HPBRII-4,HPBRII-7,4733401N12Rik | 0.00054  | 2.36081  |
| BC025045  | Cpsf4,30kDa,C79664,MGC36996                                | 1.77E-07 | 3.79719  |
| BC011155  | Cpsf3l,AU044035,2410006F12Rik                              | 0.00013  | 2.08796  |
| BM239527  | Cpsf2,Cpsf,MCPSF,100kDa,AI662483,mKIAA1367,2610024B04Rik   | 0.00055  | 1.95579  |



|           |                                                          |          |          |
|-----------|----------------------------------------------------------|----------|----------|
| BB009037  | Cp,D3ErtD555e                                            | 3.64E-07 | 11.71823 |
| AK009614  | Cox7a2l,EB1,SIG81,COX7AR,COX7RP,SIG-81,Silg81,MGC103208  | 0.00039  | 1.57069  |
| NM_010926 | Cox4nb,Noc4                                              | 2.38E-08 | 2.70041  |
| BQ175820  | Copa,xenin,AU040324                                      | 5.24E-07 | 1.75001  |
| BB230296  | Commd3,Bup,AW550818,D2ErtD542e                           | 0.00006  | 2.01823  |
| BI412929  | Commd2,HSPC042,AI047739,D3ErtD176e,1190017G07Rik         | 0.00085  | 1.83922  |
| AB076722  | Commd1,Murr1,AI256843                                    | 0.00002  | 2.74092  |
| BG074456  | Col9a3,AV006866                                          | 0.00006  | 5.41289  |
| AK004383  | Col9a1,Col9a-1                                           | 0.0003   | 2.29597  |
| BF158638  | Col4a1,Col4a-1                                           | 0.00032  | 2.32176  |
| AW550625  | Col3a1,Ms10w,Col3a-1,MMS10-W,AW550625,KIAA4231,mKIAA4231 | 8.13E-12 | 3.16119  |
| BB836814  | Col11a1,cho                                              | 8.49E-24 | 16.27414 |
| AV294603  | Cog7,Gm167,5630400E24Rik                                 | 1.02E-36 | 5.1161   |
| BB210424  | Cog1,Ldlb,KIAA1381,mKIAA1381,6030445115                  | 0.00041  | 2.32668  |
| BM940481  | Cnot6,CCR4,AA407540,AW456442,MGC98472,A230103N10Rik      | 6.01E-14 | 2.89605  |
| BM940481  | Cnot6,CCR4,AA407540,AW456442,MGC98472,A230103N10Rik      | 9.59E-06 | 1.58248  |
| BB705075  | Cnn3,C85854,1600014M03Rik                                | 1.28E-24 | 2.77573  |
| AW547258  | Cnih4,HSPC163,AI647760,AW050376,D530030D03Rik,           | 4.86E-09 | 2.41591  |
| BM237919  | Cnbp1,Cnbp,AA408710                                      | 2.69E-07 | 1.8508   |
| NM_024217 | Cmtm3,BNAS2,Cklfsf3,AI413895,9430096L06Rik               | 7.29E-07 | 5.37323  |
| BG067086  | Clspn,C85083,CLASPIN,B130025E01,E130314M08Rik            | 9.11E-30 | 4.50917  |
| NM_020008 | Clec7a,BGR,beta-GR,Clecsf12                              | 1.81E-10 | 6.59877  |
| AF108501  | Clca2                                                    | 2.91E-07 | 3.7839   |
| BB037161  | Clasp1,mCLASP1,                                          | 0.0001   | 1.90036  |
| NM_025415 | Cks2,CKSHS2,1110038L14Rik                                | 0        | 31.45478 |
| NM_016904 | Cks1b,Cks1,sid1334,AA407784,2410005G18Rik,2610005D03Rik  | 3.35E-40 | 32.14933 |
| AY047360  | Cklf,C32,CKLF1,CKLF3,CKLF4,CKLF5,Cklf2,Cklf6,            | 4.90E-12 | 17.28153 |
| BB312117  | Ckap4,P63,CLIMP-63,5630400A09Rik                         | 0.00045  | 2.39522  |
| BM208103  | Ckap2,LB1,AI461656,AW228814                              | 0        | 22.59788 |
| BQ174991  | Chsy1,KIAA0990,mKIAA0990                                 | 1.62E-33 | 3.07188  |
| AF472588  | Chrna3,(a)3,Acra3,Acra-3,A730007P14Rik                   | 2.68E-08 | 4.65828  |
| NM_016681 | Chek2,CHK2,Cds1,Rad53,HUCDS1                             | 0.00001  | 2.07317  |
| C85740    | Chek1,Chk1,rad27,C85740                                  | 2.40E-23 | 16.09168 |
| AW554535  | Chd7,A730019I05Rik                                       | 0.00014  | 1.66591  |
| BE630807  | Chd2,BC029703                                            | 0.00004  | 4.55856  |
| BM246546  | Chchd3,AW558177,0610041L09Rik,1700039J09Rik              | 7.22E-06 | 1.96256  |
| BC013532  | Chaf1b,CAF1,CAF1A,C76145,CAF1P60,CAF-lp60,               | 2.04E-16 | 4.88647  |
| AW457682  | Cep57,Tsp57,AI467480                                     | 3.99E-08 | 2.88759  |
| BB466021  | Cep1,IB3/5,Ma2a8,CEP110,AA968343,6720467O09Rik           | 4.41E-06 | 3.01436  |
| BG068259  | Cenpj,LAP,CPAP,Gm81,LIP1,MGC102215,4932437H03Rik         | 9.06E-13 | 5.43461  |
| BC025084  | Cenph,ENP,CENP-H,AU044255,                               | 1.14E-09 | 9.73272  |
| BE848253  | Cenpf,CENF,Lek1,PRO1779,AI325968,6530404A22Rik           | 3.80E-23 | 26.67516 |
| BG916502  | Cenpe,Kif10,312kDa,CENP-E,AU019344,BC049989,C530022J18   | 8.35E-41 | 23.55517 |
| NM_007683 | Cenpc1,Cenpc                                             | 0.00006  | 2.3845   |
| AV132173  | Cenpa,Cenp-A                                             | 1.67E-35 | 28.37398 |
| BB366565  | Cecr2,KIAA1740,mKIAA1740,2610101O16Rik,2810409N01Rik     | 6.40E-11 | 10.41218 |
| AB012273  | Cebpg,Gpe1bp,Ig/EBP,GPE1-BP,C/EBP[g],C/EBPgamma          | 0.00034  | 1.77982  |
| AF320340  | Cdv3,TPP36,C79446,2510010F10Rik,C230084J24Rik            | 1.08E-15 | 2.04902  |
| AK010426  | Cdkn3,2410006H10Rik                                      | 0.00002  | 3.76857  |
| BC027026  | Cdkn2c,p18,INK4c,INK4d,C77269,p18INK4c                   | 1.73E-34 | 3.26023  |
| AK007630  | Cdkn1a,P21,CDKI,CIP1,SDI1,Waf1,                          | 7.67E-07 | 3.48075  |

|           |                                                         |          |          |
|-----------|---------------------------------------------------------|----------|----------|
| BM238926  | Cdk6,Crk2,AI504062,5830411I20                           | 5.91E-31 | 64.41711 |
| NM_009870 | Cdk4,Crk3                                               | 3.65E-23 | 12.58211 |
| AK004852  | Cdk2ap1,Doc1,ST19,Apc10,DORC1                           | 0        | 3.79155  |
| NM_016756 | Cdk2,A630093N05Rik                                      | 3.46E-10 | 2.50703  |
| BB210819  | Cdh4,Rcad,AW120700,R-cadherin                           | 6.40E-13 | 3.10588  |
| NM_011800 | Cdh20,Cdh7                                              | 4.91E-08 | 3.6132   |
| BB702047  | Cdca8,BOR,MESRGP,AU044747,D4Ert421e,4831429J16Rik       | 3.42E-28 | 31.91333 |
| AK011289  | Cdca7,JPO1,AU044109,2310021G01Rik                       | 2.65E-15 | 19.22291 |
| NM_026410 | Cdca5,C85404,AL024086,AW536684,2610036L13Rik            | 9.75E-11 | 7.66079  |
| AF322238  | Cdca4,HEPP,2410018C03Rik                                | 2.19E-06 | 9.31024  |
| BI081061  | Cdca3,C8,Grc8,Tome-1,2410005A12Rik                      | 1.20E-39 | 19.23612 |
| BG065056  | Cdca2,AI586158,2610311M19Rik                            | 4.24E-40 | 33.17091 |
| AK010351  | Cdca1,NUF2R,C85691,AU044112,2410003C07Rik               | 0.00004  | 8.40753  |
| AB018574  | Cdc7,Cdc7I1,muCd7,AI597260,MGC91067                     | 0.00093  | 1.75359  |
| NM_011799 | Cdc6,CDC18L                                             | 9.23E-20 | 13.83137 |
| NM_009862 | Cdc45l                                                  | 2.11E-17 | 8.48475  |
| AV226461  | Cdc42se2,SPEC2                                          | 3.42E-09 | 1.72712  |
| AK004569  | Cdc40,EHB3,PRP17,1200003H23Rik                          | 0.00006  | 1.79838  |
| NM_007659 | Cdc2a,CDK1,Cdc2,p34<CDC2>                               | 0        | 64.98814 |
| BB209183  | Cdc25c,Cdc25                                            | 0.00003  | 8.72686  |
| NM_023117 | Cdc25b,AI604853                                         | 0.00044  | 2.17468  |
| C76119    | Cdc25a,D9Ert4393e                                       | 5.14E-06 | 1.90465  |
| BB492440  | Cdc23,6030435O18,D18Ert4243e                            | 0.00047  | 2.32083  |
| BB041150  | Cdc20,C87100,p55CDC,2310042N09Rik                       | 2.87E-18 | 9.45157  |
| BC026606  | Cdc16,2810431D22Rik                                     | 2.82E-10 | 1.7472   |
| BB479310  | Cdc14a,Cdc14,CDC14A2,CDC14a1,A830059A17Rik              | 0.00006  | 3.55727  |
| AK004342  | Cd99,D4,pilr-1,1110061M03Rik,2410026K10Rik              | 0.00003  | 3.97983  |
| NM_007657 | Cd9,Tspan29                                             | 2.30E-41 | 5.64541  |
| NM_013489 | Cd84,CDw84,SLAMF5,A130013D22Rik                         | 0.0001   | 1.68699  |
| BC021637  | Cd68,gp110,Scard1                                       | 5.48E-17 | 5.70519  |
| NM_007651 | Cd53,Ox-44,Tspan25,AI323659                             | 0.00009  | 4.4135   |
| NM_013706 | Cd52,B7,MB7,CLS1,B7-Ag,AI463198,CAMPATH-1               | 9.72E-14 | 8.18554  |
| AW146109  | Cd44,Ly-24,Pgp-1,HERMES,AW121933,AW146109               | 0.00001  | 2.00126  |
| AF251705  | Cd300d,CLM4,DlgR1,Igsf7,Lmir2,Cd300c,MAIR-II            | 0.00061  | 2.56193  |
| BB398671  | Cd2ap,C78928,METS-1,AL024079                            | 0.00048  | 2.10676  |
| BF123439  | Cd24a,HSA,Ly-52                                         | 0        | 29.78566 |
| NM_007639 | Cd1d1,Cd1a,Cd1d,CD1.1,Ly-38,AI747460                    | 1.94E-24 | 11.58478 |
| NM_007638 | Cct7,Ccth,Cctz,AA408524,AL022769                        | 2.14E-31 | 2.22252  |
| AI325146  | Cct6a,Cct6,Cctz-1                                       | 1.02E-09 | 1.57326  |
| NM_007637 | Cct5,Ccte,mKIAA0098                                     | 2.21E-20 | 1.8849   |
| BE648588  | Cct4,A45,Cctd,C78323,2610204B21Rik                      | 0.0004   | 2.14321  |
| AL024092  | Cct3,Cctg,Tric-P5,AL024092,Tcp1-rs3                     | 0.0004   | 1.74729  |
| NM_007636 | Cct2,Cctb                                               | 2.59E-12 | 2.0548   |
| AA798895  | Ccrn4l,Ccr4,AU043840,nocturnin                          | 2.33E-06 | 2.56546  |
| BF320908  | Ccr9,Cmkbr10,GPR-9-6                                    | 1.27E-14 | 2.56434  |
| NM_007634 | Ccnf,CycF                                               | 1.26E-07 | 5.43292  |
| BQ175880  | Ccnd2,Vin1,Vin-1,C86853,AI256817,BF642806,2600016F06Rik | 1.95E-19 | 19.0801  |
| NM_007631 | Ccnd1,Cyl-1,PRAD1,bcl-1,AI327039                        | 0        | 13.40569 |
| AK013312  | Ccnb2,CycB2                                             | 4.72E-28 | 30.74549 |
| NM_007629 | Ccnb1-rs1,CycB1,Cycb-5,Cycb1-rs1                        | 9.68E-20 | 21.37836 |
| NM_007629 | Ccnb1-rs1,CycB1,Cycb-5,Cycb1-rs1                        | 8.65E-24 | 20.34534 |

|           |                                                        |          |          |
|-----------|--------------------------------------------------------|----------|----------|
| X75483    | Ccna2,Ccn1,Ccna,Cyca,Ccn-1,AA408589                    | 2.30E-40 | 21.53871 |
| BG093955  | Ccm2,BC029157,MGC37115,RP23-169J19.3                   | 8.35E-08 | 5.5032   |
| NM_021443 | Ccl8,HC14,Mcp2,MCP-2,Scya8,AB023418,1810063B20Rik      | 0.0002   | 4.31292  |
| AF281075  | Ccl24,CKb-6,MPIF-2,Scya24                              | 0.00026  | 3.4174   |
| BC024400  | Ccdc5,HEI-C,BC024400,MGC36238                          | 1.12E-14 | 5.80661  |
| BC002274  | Ccdc23,AI851162,2410005K17Rik                          | 0.00013  | 2.51677  |
| NM_138603 | Ccdc22,Sfc22,AI481216,DXImx40e                         | 5.69E-06 | 1.99872  |
| AV271182  | Ccdc18,MGC100177,NY-SAR-41,1700021E15Rik,4932411G06Rik | 0.00029  | 5.61016  |
| AW538049  | Ccar1,Carp1,MGC90759,2610511G16Rik,9430036H15Rik       | 1.61E-07 | 1.9676   |
| NM_007626 | Cbx5,HP1,HP1a,C75991,2610029O15Rik                     | 4.27E-06 | 2.47715  |
| BC018354  | Cbx3,M32,HP1g,MGC118084                                | 9.51E-10 | 1.70099  |
| BI440502  | Cbx1,Cbx,M31,HP1B,MOD1,Cbx-rs2,E430007M08Rik           | 8.68E-11 | 2.45079  |
| NM_022309 | Cbfb,PEA2,Pebp2,PEBP2b,Pebpb2,AI893578                 | 1.02E-26 | 5.6142   |
| NM_009824 | Cbfa2t3h,ETO-2,MTGR2,A630044F12Rik                     | 0.00059  | 3.12058  |
| NM_011997 | Casp8ap2,FLASH,mKIAA1315,D4Erttd659e                   | 0.00003  | 1.83881  |
| NM_009811 | Casp6,Mch2,mCASP-6                                     | 3.25E-05 | 2.12545  |
| BG070529  | Casp3,Lice,Yama,PPP32,Apopain,Caspase-3,A830040C14Rik  | 7.59E-14 | 8.59241  |
| NM_007610 | Casp2,ICH-1,Nedd2,Caspase-2                            | 4.83E-36 | 3.91981  |
| BB818947  | Casc5,MGC91208,2310043D08Rik,5730505K17Rik             | 8.02E-07 | 7.82938  |
| AU080787  | Carhsp1,Crhsp-24,MGC101919,D16Erttd465e,1200011K09Rik  | 9.66E-24 | 5.99701  |
| NM_007606 | Car3,Car-3,BB219044                                    | 8.54E-10 | 6.35595  |
| AI463215  | Capza1,CAPZ,CAZ1,Cappa1                                | 0.00011  | 1.71812  |
| AW743924  | Capns2,2310005G05Rik                                   | 0.0003   | 5.19196  |
| BM238658  | Cand2,Tp120b,mKIAA0667,2210404G23Rik                   | 1.41E-07 | 5.02629  |
| AI510077  | Cand1,Tp120a                                           | 0.00019  | 1.51211  |
| BG862223  | Camk2b,Camk2d,MGC90738                                 | 3.61E-07 | 6.38854  |
| NM_007594 | Calu,9530075H20Rik                                     | 7.67E-21 | 2.5265   |
| AK014755  | Cald1,                                                 | 1.08E-06 | 3.46659  |
| AI462674  | Cadps,CAPS,CAPS1,AU067781,MGC90712,mKIAA1121           | 0.00046  | 4.03463  |
| NM_009784 | Cacna2d1,Cacna2,Cchl2a                                 | 5.55E-11 | 6.44869  |
| AV094811  | C80913,Rmp,NNX3                                        | 0.00002  | 1.9611   |
| C79445    | C79445                                                 | 9.52E-11 | 3.30795  |
| BB540053  | C79407,KIAA1903,mKIAA1903,6720403H11                   | 2.54E-25 | 26.92474 |
| BB182501  | C630043F03Rik,AI851307                                 | 0.0001   | 10.73829 |
| BB021125  | C630040K21Rik                                          | 4.23E-12 | 1.99883  |
| BB493717  | C530008M17Rik,KIAA1211,mKIAA1211                       | 3.00E-21 | 4.88366  |
| NM_009780 | C4,Ss                                                  | 0.00003  | 3.36772  |
| BB333624  | C3ar1,AZ3B,C3AR,HNFAG09                                | 0.00001  | 4.01353  |
| BI104294  | C330027G06Rik                                          | 1.95E-09 | 2.29739  |
| AU018569  | C330027C09Rik,AA408511,AU018569                        | 0.00014  | 3.56356  |
| BM199125  | C330017115Rik                                          | 0.00005  | 2.25124  |
| BG075755  | C230098O21Rik,AI836570,AW557042                        | 4.49E-11 | 3.43334  |
| AI852434  | C230098I05Rik,Gm637,AI852434,G630023A01Rik             | 1.31E-22 | 8.85904  |
| BB235011  | C230085N15Rik                                          | 0.00023  | 3.29621  |
| BB762904  | C230079D11Rik,Gm329,Gm945,D430002O22Rik,D930044O18Rik  | 0.00004  | 4.92787  |
| BB547893  | C230078M08Rik                                          | 3.24E-06 | 3.81463  |
| BB067544  | C230071H18Rik                                          | 0.00009  | 7.28223  |
| NM_011795 | C1ql1,CRF,C1qrf,glialcolin                             | 1.25E-10 | 2.22539  |
| NM_007574 | C1qg,C1qc,AI385742                                     | 4.83E-18 | 12.06826 |
| NM_007573 | C1qbp,P32,HABP1,gC1qBP,AA407365,AA986492,D11Wsu182e    | 0.00002  | 1.86685  |
| BB111335  | C1qb                                                   | 7.41E-37 | 10.38773 |

|           |                                                     |          |          |
|-----------|-----------------------------------------------------|----------|----------|
| NM_007572 | C1qa,C1q,AI255395                                   | 4.14E-39 | 9.43208  |
| BB739357  | C130073D16Rik,BB163993                              | 0.00007  | 2.65722  |
| BB648310  | C130071C03Rik                                       | 0.00004  | 3.89284  |
| BB431627  | C130052G03Rik,Gm17,FRAG1,FLJ12735,RP23-328O2.1      | 1.70E-13 | 4.09482  |
| BG073396  | C130032J12Rik,9130202B12                            | 1.64E-18 | 3.2436   |
| BB526251  | C130009A20Rik                                       | 0.00026  | 4.05102  |
| BB450286  | C030036D22Rik                                       | 0.00017  | 4.36495  |
| BM932775  | Bzw2,HSPC028,MGC7203,1110001I24Rik                  | 5.83E-16 | 3.80724  |
| AV144956  | Bzw1,MGC6434,mKIAA0005,1200015E15Rik                | 0.00052  | 2.84139  |
| AV144956  | Bzw1,MGC6434,mKIAA0005,1200015E15Rik                | 0.00007  | 1.90139  |
| BC014832  | Bxdc2,C76935,1110064N10Rik                          | 0.00001  | 1.83052  |
| BE986800  | Bub3,C78067,AU019800,AU021329,AU043350,AW146323     | 1.42E-10 | 1.93246  |
| AU045529  | Bub1b,BUBR1,AU045529,MGC36092                       | 5.39E-25 | 30.0337  |
| AF002823  | Bub1,Bub1a,C80208,D2Xrf87,AL022991                  | 1.49E-36 | 18.75959 |
| NM_009770 | Btg3,ANA,tob5                                       | 0.0008   | 2.01533  |
| BB724547  | Btbd9,AI464421,4930402L05,1700023F20Rik             | 6.49E-15 | 2.05126  |
| AK018115  | Btbd11,6330404E16Rik                                | 3.28E-10 | 4.45529  |
| BC021499  | Brrm1,HCAP-H,MGC38424,mKIAA0074,A730011O11Rik       | 7.95E-30 | 8.78669  |
| BG075579  | Brpf1,4833438B11Rik,4930540D11Rik                   | 0.00005  | 2.1594   |
| BG071758  | Brip1,OF,Bach1,3110009N10Rik,8030460J03Rik          | 0.00009  | 3.44073  |
| BM219644  | Brd8,SMAP,2610007E11Rik,4432404P07Rik,4933408B17Rik | 6.52E-18 | 2.03587  |
| NM_012047 | Brd7,BP75,CELTIX1,Ptpn13ip                          | 5.69E-13 | 1.88327  |
| BG072367  | Brd3,ORFX,Fsrg2,RINGL3,AW060456,2410084F24Rik       | 0.00036  | 2.53696  |
| NM_009765 | Brca2,Fancd1,RAB163,AI256696,AW045498               | 2.66E-11 | 3.90474  |
| U31625    | Brca1                                               | 4.42E-14 | 11.71085 |
| BE992311  | Bola2,BolA-2,1110025L05Rik                          | 9.28E-11 | 2.82064  |
| NM_016778 | Bok,mtd,matador,AI847676,AU021146                   | 3.45E-16 | 8.88517  |
| BB005556  | Boc,mFLJ00376,4732455C11,DKFZp434L072               | 0.0003   | 2.26356  |
| AV144704  | Bnip2,Nip21,BNIP2beta,5730523P12Rik                 | 1.38E-10 | 2.55836  |
| BB007109  | Bms1l,AA408648,AU020092,AU043373,BB007109,          | 1.92E-07 | 2.29621  |
| BC027279  | Blvrb,MGC11726,MGC27866                             | 0.00032  | 10.10686 |
| AV149605  | Blmh,BH,BMH,AI035728,MGC36899,MGC37104,MGC39026     | 1.68E-07 | 1.84341  |
| NM_007550 | Blm                                                 | 4.71E-09 | 3.75937  |
| BC004702  | Birc5,Api4,TIAP,AAC-11,survivin40                   | 0        | 35.54846 |
| NM_007544 | Bid,AI875481,AU022477,2700049M22Rik                 | 3.67E-06 | 6.78837  |
| BI965039  | Bclaf1,Btf,AI450190,AW556225,KIAA0164,MGC30519      | 0.00001  | 1.93065  |
| AK012404  | Bcl2l13,Mil1,Mil-1,MGC38758,BCL-RAMBO,E430016C20Rik | 0.00002  | 1.88002  |
| BB667581  | Bcl2l11,Bim,Bod                                     | 6.62E-06 | 3.15875  |
| L16462    | Bcl2a1a,A1,Bfl-1,Hbpa1,Bcl2a1,BB218357              | 4.22E-07 | 3.49465  |
| BM117007  | Bcl11b,Rit1,Ctip2,B630002E05Rik                     | 1.14E-10 | 5.33934  |
| BB424718  | Bcl11a,Evi9,Ctip1,mKIAA1809,2810047E18Rik           | 7.19E-17 | 11.85144 |
| X17502    | Bcat1,BCATc,Eca39                                   | 0.00001  | 1.79088  |
| BB765964  | BC088983,KIAA1712,MGC113766,mKIAA1712               | 0.00006  | 2.14863  |
| BB779105  | BC068171,MGC107501                                  | 1.37E-14 | 2.78251  |
| AV114409  | BC066140,4732427B05                                 | 0.00064  | 2.38291  |
| AI851982  | BC060615,MGC79150,B930044J06                        | 0.00009  | 3.34698  |
| BE852799  | BC053994                                            | 0.00019  | 4.01414  |
| BE949497  | BC048355,Rcl,C76683,MGC54855                        | 0.00008  | 3.62112  |
| BM933144  | BC046404,MGC59632                                   | 0.00061  | 2.86102  |
| AV276428  | BC043118,AU022790,MGC58045,5031404N19               | 6.97E-06 | 3.78758  |
| AU022230  | BC037674,FOE,mWAPL,KIAA0261                         | 0.00091  | 1.52836  |

|           |                                                             |          |          |
|-----------|-------------------------------------------------------------|----------|----------|
| AV094888  | BC030867,MGC31269,MGC117894                                 | 0.00007  | 2.12366  |
| AV239972  | BC030440,MGC40914                                           | 3.86E-07 | 3.99981  |
| BB088782  | BC029103,MGC105247,9430018I06                               | 0.00019  | 1.5594   |
| AW047294  | BC028440,MGC41256                                           | 0.00021  | 6.03968  |
| BM249388  | BC025462,MGC38195,MGC38407                                  | 1.65E-10 | 3.74266  |
| BI664409  | BC023969                                                    | 1.45E-17 | 16.20275 |
| NM_134063 | BC016423,Pap20,AI645998,KIAA2006,MGC25933,mKIAA2006         | 0.00089  | 2.0667   |
| BC003885  | BC003885,MGC6735                                            | 0.00004  | 1.53984  |
| BM239162  | Baz1a,Acf1,Gtl5,cbp146,Wcrf180,BC065123,B930060C03          | 5.30E-13 | 3.6669   |
| BC018228  | Bax                                                         | 4.31E-09 | 2.33353  |
| BC011067  | Bat1a,Bat1,Bat-1                                            | 3.27E-14 | 2.6054   |
| AK011545  | Basp1,CAP23,Ckap3,NAP22,CAP-23,NAP-22,2610024P12Rik         | 2.14E-14 | 9.28498  |
| NM_019446 | Barhl1,MBH2,Dres115                                         | 2.95E-19 | 9.92083  |
| NM_011793 | Banf1,BAF,Bcrp1,C78287                                      | 3.55E-16 | 3.27352  |
| BB459664  | Bach2,MGC117590                                             | 0.00053  | 3.14822  |
| BM239301  | B930068K11Rik                                               | 2.55E-36 | 10.79085 |
| BB208466  | B930067F20Rik,RP23-352L3.4                                  | 0.00047  | 4.11745  |
| AW556301  | B930007L02Rik,AI447437,mKIAA0800                            | 2.27E-08 | 2.30681  |
| BB329261  | B630005N14Rik,AI666701                                      | 0.00018  | 1.56105  |
| AV116077  | B3bp,Gm868,N4bp2,Gm1791,E430014I16                          | 3.11E-19 | 6.26848  |
| BF715219  | B2m,Ly-m11,beta2-m                                          | 5.07E-12 | 1.87151  |
| BB440272  | B230354K17Rik                                               | 1.29E-08 | 2.01295  |
| BE992834  | B230334C09Rik                                               | 2.52E-07 | 3.72138  |
| AW554529  | B230308N11Rik                                               | 5.50E-10 | 2.62676  |
| BB454974  | B230120H23Rik,Zak,MLTK,AV006891,MLTKbeta,MLTKalpha          | 3.80E-17 | 8.64095  |
| BG069311  | B130055D15Rik,                                              | 1.76E-13 | 1.83189  |
| BE992549  | B130050I23Rik,EVI5L,                                        | 0.0001   | 4.58653  |
| BB531021  | B130020M22Rik                                               | 0.00008  | 2.48485  |
| BB207611  | AW909330,---,0,1440196_at                                   | 0.00025  | 3.20632  |
| BF228294  | AW550801,AU040765,mKIAA1401,RP23-174M12.4                   | 5.37E-06 | 2.09959  |
| BC024822  | AW146242                                                    | 7.11E-09 | 2.69832  |
| BC003261  | Aurkb,Aik2,Aim1,Ark2,AurB,IPL1,                             | 3.07E-16 | 9.88114  |
| U80932    | Aurka,IAK,Ark1,Ayk1,Stk6,AIRK1,AU019385,AW539821,Aurora-A   | 1.06E-38 | 15.48645 |
| BB795206  | AU045404,Gm917,C85569,AA469671,AW123895                     | 2.15E-08 | 3.1482   |
| BI151331  | AU020206                                                    | 0.00041  | 2.92449  |
| BQ175324  | AU014645,Ncbp1,AW538051                                     | 5.08E-16 | 2.024    |
| AV318787  | Atxn2,ATX2,Sca2,AW544490,9630045M23Rik                      | 0.0004   | 1.52715  |
| BB425841  | Atrx,XH2,Xnp,ATR2,MRXS3,Rad54,                              | 5.41E-06 | 4.51573  |
| NM_133884 | Atpbd1b,R74630,AI838661                                     | 0.00016  | 4.31236  |
| U03434    | Atp7a,Mo,br,Blo,l14,MNK,blotchy,mottled,brindled,DXHXS1608e | 0.00082  | 1.78411  |
| NM_025272 | Atp6v0e,M9.2,Atp6k                                          | 1.87E-08 | 2.57685  |
| NM_026468 | Atp5g2,MGC118044,1810041M08Rik                              | 6.28E-13 | 1.55415  |
| BC010820  | Atoh1,Hath1,Math1,MATH-1                                    | 0        | 14.10999 |
| BB393498  | Atic,AA536954,AW212393,2610509C24Rik                        | 9.83E-08 | 3.15879  |
| AI747732  | Atg7,Agp7,Apg7I,Atg7I,1810013K23Rik                         | 8.47E-09 | 7.029    |
| BG076353  | Atbf1,WBP9,KIAA4228,mKIAA4228,A230102L03Rik                 | 0.00005  | 2.0563   |
| BM206009  | Atad2,MGC38189,2610509G12Rik                                | 1.10E-19 | 7.80316  |
| BE956516  | Asxl1,mKIAA0978,DKFZp434N0535                               | 0.00027  | 1.6994   |
| BB478135  | Aspm,Sha1,MCPH5,Calmcp1,FLJ10518,D330028K02Rik              | 9.16E-13 | 19.8562  |
| BM207355  | Ash2I                                                       | 1.17E-11 | 2.37504  |
| BC003428  | Asf1b,AA409591,1700003K02Rik                                | 1.40E-08 | 7.68668  |

|           |                                                             |          |          |
|-----------|-------------------------------------------------------------|----------|----------|
| AK007804  | Asf1a,C79052,2310079C17Rik                                  | 0.00009  | 1.74248  |
| AI327392  | Ascc3l1                                                     | 0.00001  | 1.8799   |
| BC023086  | Asb3,2400011J03Rik                                          | 0.00061  | 1.87733  |
| BB322201  | Arx                                                         | 2.95E-13 | 10.82956 |
| NM_026369 | Arpc5,165kDa,p16-Arc,5830443F10Rik                          | 0.00016  | 2.0295   |
| BC013618  | Arpc3,21kDa,p21-Ar,p21Arc,AA408672,AI788639,1110006A04Rik   | 1.58E-06 | 1.51586  |
| AK014338  | Armet,D17914,AA407711,AA408789,3230402M22Rik                | 2.54E-07 | 1.61464  |
| BB837198  | Arl6ip6,Aip-6,2310057C01Rik,2610529A11Rik                   | 5.64E-06 | 3.16141  |
| BB545273  | Arl5b,Arl8,4930587A11Rik                                    | 0.00001  | 3.4655   |
| AV273623  | Arid2,4432409D24Rik                                         | 0.00003  | 2.81035  |
| BM239772  | Arid1b,Ardi1b,AI836955,mKIAA1235,8030481M12,                | 0.00019  | 1.74976  |
| NM_008487 | Arhgef2,GEF,Lfc,P40,GEFH1,LFP40,Lbcl1,GEF-H1                | 0.00078  | 3.02938  |
| BG072763  | Arhgap19,AI120128,AW546831,FLJ00368,mFLJ00368,4933411B03Rik | 1.60E-06 | 9.94745  |
| BB199681  | Arhgap18,AI314906,AI843501,4833419J07Rik                    | 0.00032  | 2.68327  |
| AV349116  | Arhgap11a,mKIAA0013,GAP (1-12),6530401L14Rik                | 7.57E-44 | 20.43668 |
| BI653265  | Arf4,AA407803                                               | 6.79E-08 | 1.78876  |
| BI653265  | Arf4,AA407803                                               | 2.31E-27 | 1.62791  |
| NM_019870 | Ard1,Te2,2310039H09Rik                                      | 5.47E-07 | 6.32503  |
| NM_007475 | Arbp,36B4,MGC107165,MGC107166                               | 0        | 3.66507  |
| BB471787  | Aprin,AS3,AI646570,AW212954,mKIAA0979                       | 2.61E-09 | 5.39103  |
| BB023775  | App,Adap,Cvap,Abeta,amyloid,appican                         | 0.00092  | 1.88636  |
| BC003792  | Apobec1,Cdar1                                               | 0.00091  | 3.32699  |
| AV263745  | Apex1,APE,Apex,HAP1,Ref-1                                   | 7.53E-19 | 13.91432 |
| BB770932  | Apcdd1,Drapc1,EIG180,AB023957,AU041258                      | 1.98E-07 | 2.66406  |
| BB271021  | Apcdd1                                                      | 0.00066  | 2.44408  |
| BM124893  | Apc,Min,AI047805,AU020952,AW124434                          | 0.00047  | 1.9771   |
| AK018076  | Apaf1,fog,Apaf-1,Apaf1l,KIAA0413,mKIAA0413,6230400106Rik    | 1.09E-11 | 3.03063  |
| NM_009682 | Ap3s2,[s]3B                                                 | 7.02E-06 | 5.11819  |
| BE655707  | Ap1s2,EST1,AI853648,1500012A13Rik                           | 0.00008  | 2.14168  |
| BB433211  | Ap1m1,AP47,mu1A,Cltm,[m]1A,Adtm1A,AA408894                  | 0.00027  | 1.8633   |
| AK007763  | Aof2,AA408884,mKIAA0601,D4Ert478e,1810043O07Rik             | 2.98E-13 | 3.20712  |
| BC003908  | Antxr2,CMG2,CMG-2,cl-35,AW561899,2310046B19Rik              | 2.16E-06 | 4.35537  |
| AF378762  | Antxr1,Tem8,Antrx1,2310008J16Rik,2810405N18Rik              | 0.0002   | 1.69264  |
| NM_023210 | Anp32e,CPD1,LANPL,LANP-L,mLANP-L                            | 6.55E-25 | 3.512    |
| NM_130889 | Anp32b,PAL31,Ssp29,PHAPI2a,MGC103080,2410015B15Rik          | 6.70E-07 | 2.4278   |
| BI690018  | Anln,C78101,Scraps,ANILLIN,1110037A17Rik,2900037I21Rik      | 5.46E-07 | 2.2532   |
| BB407885  | Ankrd41,C430003I23,8430438L13Rik                            | 0.00002  | 3.35724  |
| NM_021505 | Anapc5,Anpc5,AA408751,AA536819,AA986414,2510006G12Rik       | 2.31E-16 | 2.92657  |
| BF322051  | Anapc10,APC10,1500026N15Rik,A830003M23Rik                   | 0.00011  | 1.82959  |
| NM_008569 | Anapc1,Apc1,Mcpr,tsg24,                                     | 1.40E-06 | 2.13684  |
| BB443911  | Als2cr19,PAR3B,PAR3L,PAR3beta,                              | 2.50E-07 | 4.67709  |
| BM249614  | Alg8,Gm1089,AI447372,MGC74399                               | 0.00042  | 1.8501   |
| BM231794  | Aldh1l2,MGC19039,D330038I09Rik                              | 0.00075  | 1.83497  |
| AU041266  | Alcam,BEN,SC1,MuSC,CD166,AI853494,DM-GRASP,MGC27910         | 0.00033  | 4.35887  |
| NM_019776 | AL033314,Snd1                                               | 6.37E-06 | 2.2346   |
| BB394466  | AL024069,MGC90850,5033414K04Rik                             | 0.00025  | 3.52819  |
| NM_009652 | Akt1,Akt,PKB,PKB/Akt,PKBalpha                               | 0.00003  | 2.78919  |
| NM_009658 | Akr1b3,AR,ALR2,Ahr1,Ahr-1,Aldr1,Akr1b1,Aldor1               | 0.00054  | 1.81204  |
| BG296124  | Akr1a4,Akr1a1,2610201A18Rik                                 | 3.42E-06 | 1.65279  |
| AV304590  | Akap13,BRX,LBC,Ht31,AKAP-Lbc                                | 1.79E-10 | 3.17585  |
| BG070592  | AK122525,mKIAA1553                                          | 0.00034  | 4.42325  |

|           |                                                       |          |          |
|-----------|-------------------------------------------------------|----------|----------|
| NM_019467 | Aif1,G1,lba1,AIF-1,AI607846,D17H6S50E                 | 1.16E-12 | 6.28973  |
| AI843755  | AI843755                                              | 5.93E-06 | 4.15984  |
| AA049040  | AI840980,MGC30448                                     | 0.00053  | 1.52528  |
| BM240173  | AI788777                                              | 0.00039  | 4.17477  |
| BE688410  | AI662270,AW496474                                     | 0.00068  | 2.93933  |
| BB014626  | AI597013,MGC116630,mKIAA1968,RP23-340H1.6             | 0.00085  | 4.50085  |
| BI438039  | AI506816                                              | 1.82E-22 | 9.28388  |
| BB200448  | AI503316                                              | 3.63E-07 | 1.56675  |
| AU018180  | AI481316                                              | 8.95E-12 | 3.58953  |
| BG073348  | AI461788,KIAA2037,mKIAA2037,4832414L08                | 0.00038  | 2.48187  |
| AV094878  | AI449441,Pif1,4631410M14                              | 2.58E-08 | 4.53909  |
| BG144063  | AI429294                                              | 0.00045  | 2.47605  |
| BC024862  | AI413631,MGC36453                                     | 0.00028  | 2.5736   |
| BG068357  | AI315324                                              | 0.00009  | 1.93558  |
| NM_016661 | Ahcy,CuBP,SAHH,AA987153,AL024110,MGC118063            | 1.30E-11 | 2.88247  |
| BQ177036  | Aff3,Laf4,LAF-4,3222402O04Rik                         | 0.00003  | 5.16401  |
| NM_007410 | Adh5,Adh3,Adh-5,GSNOR                                 | 9.61E-07 | 1.86242  |
| NM_007408 | Adfp,ADPH,Adrp,AA407157                               | 2.14E-11 | 3.8025   |
| AV298858  | Add2,2900072M03Rik                                    | 3.05E-11 | 10.47827 |
| BB317588  | Adck5,MGC69569,A230108P17                             | 7.02E-08 | 6.43441  |
| BB227648  | Adamts6,ADAM-TS6,5031426K13,A930019D11Rik             | 3.59E-18 | 7.5704   |
| D67076    | Adamts1,C3-C5,METH1,ADAMTS,ADAM-TS1                   | 0.00035  | 2.00525  |
| C76813    | Adam17,Tace,CD156b                                    | 0.00005  | 5.77436  |
| NM_007397 | Acvr2b,ActRIIB,MGC118477                              | 0.00017  | 4.07221  |
| NM_019673 | Actl6a,Actl6,Baf53a,C79802,AI851094,2810432C06Rik     | 2.97E-13 | 6.32159  |
| BB143557  | AcsI5,ACS2,ACS5,Faci5,1700030F05Rik                   | 0.00029  | 1.97808  |
| BI413218  | AcsI1,Acs,Acas,FACS,Acas1,Faci2                       | 1.15E-08 | 3.24626  |
| BC005454  | Aco1,Irp1,Aco-1,Irebp,AI256519                        | 0.00038  | 2.72858  |
| AV148646  | Acat2,Tcp-1x,AW742799,Tcp1-rs1                        | 2.32E-14 | 3.13964  |
| BG070487  | Acat1,Acat,6330585C21Rik                              | 0.00006  | 1.96718  |
| BB422726  | Abr,AU042359,6330400K15Rik                            | 0        | 2.53873  |
| AV009478  | Abhd14a,Dorz1,AW558221,1110013B16Rik                  | 0.00008  | 2.16319  |
| NM_011920 | Abcg2,MXR,ABCP,BCRP,MXR1,ABC15,Bcrp1,AI428558         | 2.41E-06 | 2.19531  |
| BG071908  | Abcc1,MRP,Mrp1,Mdrap,Abcc1a,Abcc1b                    | 0.0006   | 1.77724  |
| AK011997  | Aak1,C79663,R75501,                                   | 0.00012  | 4.92108  |
| BM952039  | AA408420                                              | 0.00046  | 2.63517  |
| BG070043  | AA408296,AW045375                                     | 8.38E-06 | 1.68159  |
| BB243507  | A930004J17Rik                                         | 0.00065  | 1.76803  |
| BE136476  | A830080D01Rik,Gm1146,2310067E24Rik                    | 6.14E-08 | 1.9319   |
| BB246786  | A730016A17                                            | 0.00011  | 2.02198  |
| BB016206  | A430106J12Rik,Ape,Giv,Hkrp1,                          | 3.83E-07 | 1.93878  |
| BC026947  | A230072I16Rik,Bit1,CGI-147                            | 0.0001   | 3.73711  |
| AV221928  | A230057G18Rik,3632434I06                              | 3.90E-17 | 16.56306 |
| AI428811  | 9830124H08Rik,MGC38922                                | 0.00013  | 1.55336  |
| BB456107  | 9630019E01Rik                                         | 0.00098  | 2.82185  |
| BI076710  | 9630010G10Rik                                         | 5.77E-22 | 3.86536  |
| BQ175905  | 9430080K19Rik,AU043147,AW046177                       | 4.17E-12 | 2.99591  |
| AV374669  | 9430063L05Rik,C87016,KIAA0477,mKIAA0454,4732458A06Rik | 2.55E-06 | 1.5857   |
| AV162270  | 9430041P20Rik                                         | 7.70E-17 | 7.07314  |
| AK020412  | 9430012M22Rik                                         | 1.25E-16 | 6.8576   |
| BM235749  | 9430010O03Rik,C130008N12                              | 1.06E-06 | 1.98     |

|           |                                                         |          |          |
|-----------|---------------------------------------------------------|----------|----------|
| BB452927  | 9030624J02Rik,2610029J22Rik                             | 0.00095  | 3.45222  |
| AA153045  | 9030025P20Rik                                           | 1.07E-10 | 3.85477  |
| AI595815  | 7330412A13Rik                                           | 7.74E-11 | 3.08969  |
| BB667188  | 6820424L24Rik,AA410078,Al661722                         | 0.0008   | 2.12329  |
| NM_026551 | 6720485C15Rik,Al849483,FLJ22955,3010024O21Rik           | 0.00044  | 3.79241  |
| AK020138  | 6720463M24Rik,Al317232                                  | 1.83E-17 | 20.18092 |
| AK011345  | 6720460F02Rik,Al115087,2610008F03Rik,RP23-207N15.1      | 9.86E-12 | 13.09755 |
| BI456243  | 6720456B07Rik,AW011779                                  | 0.00039  | 1.62221  |
| AK020112  | 6720420G18Rik                                           | 3.21E-12 | 12.35346 |
| BM248225  | 6430706D22Rik,Gm975,mfleg1,MGC66590                     | 2.11E-26 | 5.52125  |
| AV333298  | 6330546B05Rik                                           | 0.00007  | 3.8269   |
| BG070835  | 6330503K22Rik,AA415922,Al427129,AW557948                | 0.00042  | 1.61622  |
| BB827546  | 6230416J20Rik,D4Ert27e,mKIAA1574,9830144E06             | 1.09E-11 | 2.7079   |
| BE987651  | 6230409E13Rik                                           | 9.87E-08 | 2.31886  |
| BB174555  | 6130401L20Rik                                           | 0.0001   | 4.36468  |
| BM123748  | 6030408C04Rik,AW046379,                                 | 6.90E-22 | 3.77388  |
| BG094946  | 5930418K15Rik,mKIAA1423                                 | 1.01E-09 | 3.20443  |
| AK011167  | 5930416I19Rik,2510047L19Rik                             | 1.17E-06 | 7.05002  |
| BG083626  | 5930412E23Rik                                           | 1.38E-06 | 4.02645  |
| AK018061  | 5830485P09Rik                                           | 0.00013  | 5.22648  |
| AK018053  | 5830474E16Rik                                           | 1.72E-11 | 11.86547 |
| BC023107  | 5830457O10Rik                                           | 0.00013  | 2.03202  |
| NM_133934 | 5830446M03Rik,Al181014,AU020769                         | 0.00003  | 5.7971   |
| BM220939  | 5830411K21Rik                                           | 1.19E-10 | 9.68192  |
| BF142017  | 5730601F06Rik,5330440G10Rik                             | 4.04E-12 | 2.21712  |
| AK017795  | 5730528L13Rik,2410046L14Rik,2810429P03Rik               | 0.00024  | 5.67738  |
| BM241442  | 5730521P14Rik                                           | 4.40E-06 | 1.53634  |
| BB255999  | 5730507N06Rik                                           | 3.21E-11 | 2.35846  |
| AV228095  | 5730507H05Rik,Hcapg,MFT.M05.13                          | 0.00078  | 3.73867  |
| AK017704  | 5730478J17Rik                                           | 5.06E-32 | 25.57003 |
| BE308547  | 5730427N09Rik,Yr29,LNR42,Nsa2p,MGC118054                | 8.93E-14 | 2.42984  |
| AV254619  | 5730405K23Rik                                           | 0.00022  | 3.02481  |
| BB390851  | 5430417C01Rik                                           | 0.00003  | 3.13925  |
| AW112059  | 5430416N02Rik                                           | 0.00014  | 4.5698   |
| AK019901  | 5330421F07Rik,AU067780,mKIAA3015                        | 0.00026  | 2.17568  |
| BC024953  | 5033414D02Rik,Al852040,1110007H22Rik                    | 6.92E-08 | 3.52981  |
| AK017164  | 5033413D16Rik                                           | 1.52E-06 | 6.91779  |
| BG081701  | 5033405K12Rik,Al596370,MGC47019,mKIAA1458,8030444K12Rik | 0.00011  | 1.73798  |
| AV303037  | 4933440N22Rik                                           | 0.00039  | 1.68675  |
| AK013967  | 4933434L15Rik,MGC74393                                  | 0.00009  | 2.71125  |
| BB667633  | 4933430F16Rik                                           | 1.81E-06 | 2.83283  |
| BB361436  | 4933426L22Rik,Cep170,Al195353,A330004A13Rik             | 0.00068  | 2.24328  |
| BG067990  | 4933424N09Rik,mKIAA1504                                 | 0.00019  | 3.05002  |
| NM_138757 | 4933424B01Rik,MGC28965                                  | 0.00002  | 2.06879  |
| BM120177  | 4933415A04Rik                                           | 0.00014  | 2.0945   |
| BB476293  | 4933407H18Rik,mKIAA1530,D330017J19Rik                   | 8.87E-06 | 3.4662   |
| BB096900  | 4933402J24Rik                                           | 0.00043  | 2.94706  |
| BE374941  | 4932442E05Rik                                           | 4.19E-13 | 4.51376  |
| BB076113  | 4931406I20Rik,AV302541,4732477A13,5730503K05Rik         | 0.00003  | 2.42728  |
| BB821996  | 4930579G24Rik                                           | 0.00008  | 3.79379  |
| BI987274  | 4930578M01Rik,3010001K12Rik                             | 1.52E-07 | 6.56943  |



|           |                                                           |          |          |
|-----------|-----------------------------------------------------------|----------|----------|
| AI480494  | 4930534B04Rik,AI449708,AI480494,E230024F20,5430424K18Rik  | 7.09E-06 | 4.42474  |
| BM199465  | 4930516B21Rik,AA432611,AI850658                           | 0.00002  | 4.43307  |
| AK015695  | 4930504C09Rik                                             | 0.00081  | 2.83793  |
| AI450962  | 4930503L19Rik,BB148262,9930107F24                         | 0.00035  | 4.57316  |
| BM245060  | 4930431H11Rik                                             | 0.00009  | 2.65162  |
| BE951637  | 4930427A07Rik,AA536649,FLJ00116,mFLJ00116                 | 2.58E-08 | 2.99133  |
| AK013448  | 4930402H24Rik,C78926,AI413763,2810487F15Rik               | 0.00001  | 5.81561  |
| BM876680  | 4921537D05Rik,2600001G24Rik,5730513H21Rik                 | 1.10E-06 | 2.69096  |
| BE863648  | 4833427B12Rik,Pfs2,AI323585,2210013I18Rik                 | 2.60E-17 | 3.66802  |
| AW764291  | 4833423F13Rik                                             | 0.00026  | 5.14203  |
| AK005287  | 4833421E05Rik,1500019E20Rik                               | 0.00016  | 2.30318  |
| BG067119  | 4833420G17Rik,C85193,AW107518,2210017J06Rik,5730533D17Rik | 1.86E-06 | 1.59141  |
| BC021511  | 4732486I23Rik,AI502974                                    | 0.00081  | 3.90686  |
| AV227569  | 4632419I22Rik,RP23-50E4.1                                 | 0.00065  | 2.40622  |
| NM_026640 | 4632417K18Rik,AW413625                                    | 1.49E-14 | 5.75703  |
| BB326056  | 4632417D23Rik                                             | 5.35E-09 | 4.76828  |
| AK014527  | 4631422C13Rik,D430014P18Rik                               | 1.29E-20 | 5.01938  |
| BB466044  | 3526402H21Rik                                             | 2.52E-08 | 2.22505  |
| BE225664  | 3222401M22Rik,KIAA0084,2700010E02Rik                      | 0.00092  | 4.2471   |
| BC006736  | 3200002M19Rik,6330414C15Rik                               | 0.00004  | 3.54561  |
| BQ179705  | 3200001K10Rik,AA386890,6430512A10Rik                      | 0.00038  | 1.99664  |
| AW536655  | 3110050K21Rik,C87618,2600010B19Rik,4930570G11Rik          | 0.00024  | 1.90451  |
| AK014134  | 3110037I16Rik,AV297100                                    | 2.05E-06 | 3.32232  |
| AA879840  | 3110009E18Rik                                             | 0.00001  | 2.45565  |
| AV339304  | 3110007F17Rik                                             | 0.00016  | 2.70919  |
| AK013984  | 3110003A17Rik,MGC107537,1700028I04Rik                     | 2.09E-14 | 7.66602  |
| BE915283  | 3110001D03Rik,1700027K24Rik,RP24-200F10.1                 | 0.00002  | 1.52145  |
| AK013867  | 3000004C01Rik                                             | 4.42E-13 | 6.01008  |
| AK019372  | 3000003F02Rik                                             | 0.00009  | 3.57817  |
| BB807002  | 2900092D14Rik                                             | 0.00007  | 3.60911  |
| BI686661  | 2900073G15Rik,C80200,AI838292                             | 5.45E-29 | 2.23134  |
| BI793813  | 2900045N06Rik,C85544,FLJ10707,                            | 0.00004  | 3.41176  |
| AK013552  | 2900018N21Rik                                             | 1.18E-09 | 3.47406  |
| BB711284  | 2900006B13Rik,RP23-79E13.3                                | 0.00002  | 3.83344  |
| AV337692  | 2810485I05Rik,C78303                                      | 8.95E-07 | 1.85903  |
| AA509870  | 2810474O19Rik,GET,AA536804                                | 2.60E-13 | 2.46206  |
| AK013380  | 2810465G24Rik                                             | 1.69E-07 | 2.37324  |
| BE456545  | 2810442I21Rik,4930500E12Rik                               | 0.0002   | 2.76665  |
| AF332866  | 2810441K11Rik                                             | 0.00009  | 4.87073  |
| NM_025581 | 2810433K01Rik,AV117428                                    | 6.85E-41 | 9.60865  |
| AK017673  | 2810417H13Rik,Ns5apt9,Ns5atp9,AA409629,MGC29306,mKIAA0101 | 1.00E-13 | 12.79791 |
| AK013101  | 2810417D08Rik,AA408260,AI987735,mKIAA1287                 | 4.27E-13 | 2.20786  |
| AK013094  | 2810416A17Rik                                             | 6.56E-15 | 5.57241  |
| BC002240  | 2810410M20Rik,DPY30,C87842                                | 2.60E-11 | 1.86295  |
| AK013051  | 2810409C01Rik                                             | 4.27E-09 | 2.50089  |
| BB374084  | 2810408A11Rik,4930470J18Rik,RP23-172M21.16                | 0.00026  | 3.31873  |
| BC025460  | 2810406C15Rik,CNAP1,CAP-D2,MGC39046,mKIAA0159             | 6.49E-08 | 6.61698  |
| NM_133747 | 2810405J04Rik,AL024114                                    | 0.00012  | 1.68797  |
| BB451286  | 2810055G20Rik,D730043B02Rik                               | 4.32E-11 | 4.63978  |
| NM_026034 | 2810037C14Rik,Svh                                         | 0.0001   | 3.22927  |
| BM232345  | 2810028N01Rik                                             | 2.35E-08 | 5.22163  |

|           |                                                             |          |          |
|-----------|-------------------------------------------------------------|----------|----------|
| NM_026613 | 2810027O19Rik,AI596202,4930522P10Rik                        | 2.55E-08 | 4.0144   |
| AK012825  | 2810026P18Rik,4933428I09Rik                                 | 2.37E-18 | 4.08381  |
| AK012812  | 2810025M15Rik,AI429618                                      | 1.17E-07 | 2.09019  |
| NM_025615 | 2810004N23Rik,3110004G14Rik                                 | 0.00039  | 2.29535  |
| BI408855  | 2700094K13Rik,Selh                                          | 3.41E-37 | 4.77952  |
| BM224226  | 2700091N06Rik,AV168274,2400002C23Rik                        | 0.00002  | 4.63361  |
| BB494601  | 2700085M18Rik,AI616142                                      | 0.00005  | 2.15184  |
| BE951772  | 2700083E18Rik,Gm411,AA387377                                | 5.76E-09 | 3.93064  |
| AV131166  | 2700081O15Rik,AI255177,AI848741,AW742297                    | 2.55E-32 | 5.24982  |
| NM_026528 | 2700060E02Rik                                               | 7.03E-06 | 1.73925  |
| AK012399  | 2700049A03Rik,mKIAA0586                                     | 5.83E-06 | 3.08852  |
| AK012301  | 2700029E10Rik,Reep4                                         | 1.03E-06 | 4.34147  |
| BB822655  | 2700023E23Rik                                               | 0.00023  | 5.27517  |
| AI891882  | 2610528M18Rik                                               | 5.51E-06 | 5.07694  |
| AV122663  | 2610528G24Rik                                               | 6.24E-24 | 3.59224  |
| AK019979  | 2610528E23Rik,AV099812,AV122629,1110001A06Rik,4930572F24Rik | 1.19E-10 | 5.7099   |
| AW494389  | 2610524H06Rik                                               | 7.80E-06 | 1.97788  |
| BB836571  | 2610524G07Rik,Preli                                         | 0.00016  | 2.91357  |
| BM230253  | 2610510J17Rik,AI426416,AW545024                             | 2.05E-11 | 4.76769  |
| BF303035  | 2610510H03Rik                                               | 7.03E-10 | 1.70249  |
| BM293412  | 2610319H10Rik                                               | 0.00084  | 1.98165  |
| AV300716  | 2610307O08Rik                                               | 0.00005  | 4.05806  |
| AU017373  | 2610207P08Rik                                               | 1.62E-13 | 7.02113  |
| AK011896  | 2610206B13Rik,AI451544,MGC35679,2810449K13Rik               | 3.36E-15 | 2.41782  |
| BM220421  | 2610203C20Rik                                               | 0.00007  | 2.58787  |
| AK011838  | 2610110G12Rik,0610011P08Rik,2610008K08Rik,3110080J08Rik     | 0.00008  | 3.44111  |
| BB815856  | 2610109H07Rik                                               | 2.52E-08 | 15.17164 |
| AU043467  | 2610040C18Rik,2810407L01Rik                                 | 1.00E-06 | 4.45043  |
| AK012533  | 2610039C10Rik,MGC100039,2810018N07Rik                       | 6.48E-30 | 6.22021  |
| BF453953  | 2610036L11Rik                                               | 0.00025  | 2.56082  |
| BC013813  | 2610034N24Rik,AW493223                                      | 0.00018  | 1.56954  |
| NM_026312 | 2610029G23Rik                                               | 2.45E-16 | 3.30497  |
| AK011565  | 2610027F03Rik                                               | 0.00076  | 2.72043  |
| BM214769  | 2610024B07Rik,B230114H05Rik                                 | 0.00005  | 5.28398  |
| BB140565  | 2610021K21Rik,2610110A13Rik                                 | 0.00068  | 5.72221  |
| NM_025639 | 2610019I03Rik,Pane1,AI853711                                | 2.16E-17 | 9.54642  |
| AW045679  | 2610017I09Rik                                               | 7.71E-07 | 2.97905  |
| AK020971  | 2610016F04Rik,Pb1,BAF180                                    | 2.15E-07 | 2.32734  |
| AK011162  | 2600005O03Rik,Dcc1,2010006I05Rik                            | 1.30E-10 | 11.41355 |
| AV328634  | 2600003E23Rik,Afap,AI848729,mKIAA3018,9630044L16Rik         | 4.37E-22 | 3.40237  |
| BC006674  | 2600001J17Rik,AA409762,1700018I02Rik,2810049B11Rik          | 9.15E-15 | 10.68331 |
| BE853401  | 2510006D16Rik,1500002D11Rik,4933407D05Rik                   | 0.00003  | 1.6286   |
| AV083806  | 2410127L17Rik                                               | 9.80E-06 | 1.7562   |
| BB167663  | 2410066E13Rik,AI448550,B230212L03Rik                        | 2.78E-13 | 3.27196  |
| AK010555  | 2410019A14Rik                                               | 0.00013  | 2.10977  |
| BF782285  | 2410016F19Rik,AU019813                                      | 1.20E-06 | 2.30156  |
| NM_023203 | 2410015N17Rik,AI854235                                      | 2.52E-21 | 8.92061  |
| BB000110  | 2410014A08Rik,ESTM19,X83352,AI850530,mKIAA0152              | 0.00007  | 2.34967  |
| AA939619  | 2410006H16Rik                                               | 1.23E-11 | 2.60409  |
| NM_029621 | 2410004L22Rik                                               | 0.00046  | 2.34336  |
| AK010086  | 2310067E19Rik                                               | 9.40E-16 | 4.3791   |

|           |                                              |          |          |
|-----------|----------------------------------------------|----------|----------|
| BG061080  | 2310050P20Rik                                | 0.00021  | 3.99442  |
| AW558989  | 2310047M15Rik                                | 0.00002  | 2.32073  |
| NM_133714 | 2310037I24Rik,MGC101985,MGC102368,B930009D17 | 1.27E-11 | 2.89859  |
| NM_025864 | 2310028N02Rik,AI118576                       | 0.00075  | 3.37458  |
| AK009485  | 2310022M17Rik,Fam44b,RP23-475A8.1            | 0.00004  | 2.06198  |
| AK009372  | 2310015N21Rik,AI853526                       | 0.00001  | 2.1661   |
| BM203061  | 2310014H01Rik,AA407849,AI450394              | 0.00053  | 1.96744  |
| BE457744  | 2210412D01Rik,AL023007                       | 0.0004   | 3.93034  |
| BM207133  | 2210409B22Rik                                | 0.00031  | 1.58342  |
| BB547211  | 2210016F16Rik                                | 1.00E-06 | 2.40086  |
| BB546897  | 2010317E24Rik,ang,AL033337,6030458L21Rik     | 1.63E-07 | 4.01589  |
| NM_025591 | 2010309E21Rik,AW124904,MGC117903             | 2.02E-12 | 2.60509  |
| AV066512  | 2010109N14Rik                                | 8.45E-09 | 1.91493  |
| AK006303  | 2010012C16Rik,mago,magoh                     | 3.67E-15 | 5.98848  |
| AK008190  | 2010011I20Rik,AI430961,AV108736              | 3.18E-10 | 7.48128  |
| BE627374  | 1810058I24Rik,AI414869,AI848234,EST AI414869 | 0.00002  | 3.29322  |
| NM_025558 | 1810044O22Rik,Cyb5m,AU015618                 | 0.00008  | 2.21317  |
| AV057045  | 1810044D09Rik                                | 0.0007   | 2.64293  |
| BC027410  | 1810042K04Rik,AI303239,4930403H09Rik         | 0.00005  | 2.06652  |
| BG921306  | 1810030O07Rik                                | 0.00007  | 2.19715  |
| BG088666  | 1810027O10Rik,3110009M16Rik,RP23-422L16.23   | 0.00051  | 1.78131  |
| AV111033  | 1810022K09Rik,AI746582,AL023036              | 7.92E-06 | 2.37368  |
| NM_133706 | 1810014L12Rik,AI115531                       | 0.00054  | 3.40614  |
| NM_023056 | 1810009M01Rik,Lr8,Clast1                     | 3.76E-15 | 3.85375  |
| BG070542  | 1810006K21Rik                                | 0.00094  | 2.39423  |
| BB733030  | 1700129I04Rik,D030069K18                     | 0.00003  | 2.94866  |
| AK006925  | 1700069O15Rik,3000008H23                     | 0.00009  | 1.63135  |
| BG095162  | 1700029F09Rik,MGC118304                      | 1.42E-09 | 3.27716  |
| NM_025853 | 1700022L09Rik,AW552447                       | 0.00033  | 3.21445  |
| AK014919  | 1700022C02Rik,4921518G09Rik                  | 1.43E-07 | 2.97508  |
| AK006115  | 1700019E19Rik,R75064                         | 0.00058  | 2.05081  |
| BI690175  | 1700018M17Rik                                | 3.34E-08 | 2.66178  |
| BG920261  | 1700017D01Rik                                | 5.49E-07 | 5.75193  |
| AW488914  | 1700016A09Rik                                | 0.00002  | 10.90123 |
| AK005395  | 1600002H07Rik                                | 0.00037  | 3.41838  |
| AI646809  | 1500026D16Rik,AYP1                           | 7.57E-06 | 2.60208  |
| BE859736  | 1500012F01Rik                                | 0.00045  | 2.06     |
| NM_025435 | 1500006O09Rik,Nif3I1bp1,9230101K24Rik        | 0.0003   | 1.53234  |
| BG065846  | 1500001M20Rik                                | 4.62E-09 | 2.8311   |
| BB252479  | 1200011O22Rik,AU042569,AW548074              | 1.87E-06 | 2.06236  |
| BC018188  | 1200009B18Rik,Ptx1,AA408438,4930572C01Rik    | 1.41E-06 | 1.91453  |
| AK004655  | 1200008O12Rik,2700032M20Rik                  | 8.54E-31 | 7.65761  |
| AI120476  | 1190002F15Rik,AI120476                       | 2.38E-14 | 7.29436  |
| BM120737  | 1110064P04Rik,AI450991,FLJ36626              | 6.62E-08 | 2.86149  |
| BC018294  | 1110061O04Rik,C76151,AW553738                | 0.00001  | 2.19555  |
| AK016797  | 1110061L23Rik,4933413A04Rik                  | 0.00012  | 2.6864   |
| BE307471  | 1110055N21Rik,mKIAA1698                      | 5.55E-07 | 2.42164  |
| AV321065  | 1110051B16Rik,MGC67567                       | 3.59E-07 | 7.48494  |
| BE133150  | 1110038B12Rik,0610009C20Rik,0910001G04Rik    | 7.74E-10 | 3.78138  |
| AV011961  | 1110034A24Rik,AV032410,2810020C19Rik         | 1.32E-08 | 2.521    |
| BB765875  | 1110029L17Rik                                | 0.00031  | 3.27408  |

|           |                                          |          |         |
|-----------|------------------------------------------|----------|---------|
| AK012340  | 1110025F24Rik,AI256624                   | 3.89E-07 | 4.96676 |
| BF535957  | 1110019N10Rik                            | 0.00011  | 1.83011 |
| AK003824  | 1110019K23Rik                            | 1.71E-15 | 4.8329  |
| BB208161  | 1110014K08Rik,LOC545968                  | 0.00004  | 3.57415 |
| BC009125  | 1110014D18Rik,AI661537                   | 5.30E-12 | 2.85736 |
| BC025641  | 1110007A13Rik,AU017382,BC025641,MGC36596 | 7.65E-07 | 2.25941 |
| NM_025364 | 1110005A23Rik,Cip29                      | 2.24E-11 | 1.683   |
| AK003403  | 1110004B13Rik,RP23-19I2.5,2810049P21Rik  | 2.71E-13 | 2.66973 |
| NM_134054 | 1110002B05Rik,AA407909,AA409588,AU041967 | 0.00082  | 1.59317 |
| BB539454  | 1110001A07Rik,C78640                     | 0.00035  | 1.94953 |
| NM_133771 | 0610016J10Rik,D930048L02Rik              | 0.00016  | 2.79686 |
| NM_021554 | 0610012D09Rik,Drev,MNCb-5680             | 2.75E-14 | 1.67795 |
| BC006049  | 0610011I04Rik,Keg2,AU040201,AU041743     | 0.00026  | 2.30495 |

| <b>2202 genes down-regulated in medulloblastoma (&gt;1.5 fold and P-value &lt; 0.001)</b> |                                                            |                |                    |
|-------------------------------------------------------------------------------------------|------------------------------------------------------------|----------------|--------------------|
| <b>Accession #</b>                                                                        | <b>Sequence Name(s)</b>                                    | <b>P-value</b> | <b>Fold Change</b> |
| AK008144                                                                                  | Zwint,Zwint-1,D10ErtD749e,2010007E07Rik,2600001N01Rik      | 2.21E-10       | -2.38908           |
| BM934616                                                                                  | Zmat5,D11Bwg0572e,D11Bwg1548e,RP23-280J3.5,2610510L01Rik   | 0.00011        | -6.69133           |
| BB732077                                                                                  | Zic3,Bn                                                    | 7.20E-07       | -3.73908           |
| BB361162                                                                                  | Zic1,ZIC,ZNF201                                            | 3.01E-07       | -1.71138           |
| BE955157                                                                                  | Zfyve28,Gm146,mKIAA1643,9630058O20Rik                      | 0.00007        | -2.03331           |
| NM_023322                                                                                 | Zfp99,MGC117641,2310046C23Rik,2810437E14Rik                | 0.00018        | -2.99909           |
| BM115349                                                                                  | Zfp644,Zep-2,BM-005,AA408882,D5ErtD689e,1110068L01Rik      | 5.43E-07       | -1.76445           |
| BG076162                                                                                  | Zfp612,B230354B21Rik                                       | 0.00002        | -3.68937           |
| BB333374                                                                                  | Zfp533,B830010L13Rik,C130013B13Rik                         | 6.55E-09       | -9.88612           |
| BB252481                                                                                  | Zfp364,AU042696,2610028E05Rik                              | 6.09E-06       | -1.69989           |
| BB354728                                                                                  | Zfp306,Skz1,Zfp307,mszf35,AA408594,AI132359,2810435N07Rik  | 2.22E-10       | -2.10316           |
| NM_013705                                                                                 | Zfp30,Zfp-30,2610306P15Rik                                 | 2.30E-06       | -1.86367           |
| AV319713                                                                                  | Zfp291,C430017I08,D530014O03Rik                            | 2.06E-13       | -2.31411           |
| NM_013915                                                                                 | Zfp238,RP58                                                | 1.33E-17       | -1.87432           |
| AB013097                                                                                  | Zfp179,bfp,R75574,ZNF179,AI854096                          | 9.06E-12       | -11.26165          |
| BI452653                                                                                  | Zfp106,H3a,Cd-1,sirm,Sh3bp3,D2Dcr28                        | 9.91E-11       | -1.59266           |
| BF147593                                                                                  | Zfhx4,Zfh4,Zfh-4,A930021B15,C130041O22Rik                  | 0.00026        | -3.10319           |
| AA123443                                                                                  | Zf,LAZip,LAZipII,AI606244,1110034C16Rik                    | 3.62E-11       | -1.80181           |
| BB224658                                                                                  | Zdhhc2,5730415P04Rik,6430583A19Rik                         | 0.00092        | -2.27953           |
| BM248633                                                                                  | Zdhhc17,HIP3,HYPH,Hip14,BB187739,mKIAA0946,                | 1.10E-06       | -2.03349           |
| BB530403                                                                                  | Zdhhc14,New1cp,MGC29194,B530001K09Rik                      | 0.00005        | -1.84717           |
| AK019473                                                                                  | Zc3h6,Zc3hdc6,AU024389,AW060453,KIAA2035,                  | 0.00022        | -2.48886           |
| BB767069                                                                                  | Zbtb4,mKIAA1538,2310026P19Rik,9230111I22Rik,RP23-422L16.16 | 2.49E-08       | -2.38172           |
| BE456566                                                                                  | Zbtb38,A930014K01Rik                                       | 4.40E-11       | -2.85989           |
| BM195115                                                                                  | Zbtb11,ZNF-U69274,9230110G02Rik                            | 3.07E-15       | -2.29791           |
| AA124553                                                                                  | Za20d2,Zfp216,AA415485,2310057A04Rik,5830475F03Rik         | 1.62E-06       | -1.63299           |
| AV027921                                                                                  | Ywhaz,AI596267,AL022924,AU020854,1110013I11Rik             | 6.22E-06       | -1.81956           |
| NM_011738                                                                                 | Ywhah                                                      | 2.64E-20       | -4.02265           |
| BM949577                                                                                  | Ywhag,D7Bwg1348e                                           | 0.00004        | -2.18271           |
| AW049756                                                                                  | Ypel4                                                      | 0.0001         | -3.18455           |
| AJ428067                                                                                  | Xtrp3s1,Xt3s1,AU022428,A730081N20Rik                       | 6.10E-09       | -8.8862            |
| BC024502                                                                                  | Xkr6,XRG6,BC024502,MGC37452                                | 2.14E-07       | -5.58312           |
| NM_013842                                                                                 | Xbp1,TREB5,XBP-1,TREB-5,D11ErtD39e                         | 4.35E-09       | -2.06465           |
| BI102531                                                                                  | Wwp1,AIP5,SDRP1,Tiul1,8030445B08Rik                        | 0.00048        | -2.68478           |
| BM730566                                                                                  | Wsb2,Swip2,WSB-2,AA673511                                  | 2.20E-07       | -3.03319           |

|           |                                                         |          |           |
|-----------|---------------------------------------------------------|----------|-----------|
| AK004683  | Wnt7a,px,tw,Wnt-7a,AI849442                             | 1.06E-09 | -12.11018 |
| AK007980  | Wnk2,AW122246,mKIAA1760,1810073P09Rik                   | 0.00016  | -2.10794  |
| AV298358  | Wdt2,dsu,Gm974,MGC92980                                 | 3.31E-22 | -3.8868   |
| BB795506  | Wdr7,TRAG,AI462727,mKIAA0541                            | 1.95E-12 | -1.80242  |
| BB274776  | Wdr40b,9330180J20,A230038L21Rik                         | 2.78E-07 | -4.02646  |
| BQ177185  | Wdr37,AI481191,mKIAA0982,6430603N07,                    | 1.01E-06 | -2.28167  |
| AK017549  | Wdr13,mMg21,W51679,MGC117822,DXHXS7467e,                | 8.52E-06 | -1.78427  |
| AK012075  | Wdfy3,ALFY,BWF1,Ggtb3,ZFYVE25,                          | 7.93E-06 | -1.78765  |
| NM_016852 | Wbp2                                                    | 4.89E-08 | -2.68687  |
| NM_011707 | Vtn,Vn,AI256434                                         | 4.60E-09 | -2.55285  |
| NM_016800 | Vti1b,GES30,SNARE,MVti1b,AU015348,Vti1-rp1              | 1.92E-13 | -1.71794  |
| NM_012038 | Vsnl1,VILIP,Vnsl1                                       | 0        | -30.2001  |
| NM_026664 | Vps53,RP23-147P4.2,2010002A08Rik,2310040I21Rik,         | 0.0003   | -1.87088  |
| BB270615  | Vps37c,AU042646,5730409F24Rik                           | 0.00045  | -2.72212  |
| NM_025842 | Vps28,AI847241,1110014J03Rik,D730005C08Rik              | 0.00003  | -1.52423  |
| AW541109  | Vps18,MGC36479,9930024E13Rik                            | 0.00012  | -4.54392  |
| AV372341  | Vps13c,W51662,AI552542,AV026040,C230055H22Rik           | 9.32E-25 | -11.50361 |
| AW109785  | Vps13b,Coh1,C87206,mKIAA0532,mKIAA5032                  | 0.00001  | -1.69971  |
| NM_009513 | Vmp                                                     | 3.04E-20 | -8.04104  |
| BG063333  | Vldlr,AA408956,AI451093,AW047288                        | 6.51E-06 | -3.33365  |
| AI606078  | Vegfa,VPF,Vegf,VEGF-A,VEGF120                           | 0.00002  | -4.00042  |
| BC016069  | Vdp,TAP,115kDa                                          | 1.05E-09 | -1.90954  |
| AV036172  | Vdac1,Vdac5,AL033343                                    | 2.34E-09 | -1.5234   |
| BB371361  | Vapb,R75548,VAP33b,D2Abb2e,Vamp33b                      | 0.00001  | -2.03005  |
| NM_016794 | Vamp8,Edb,AU041171,endo brevin                          | 1.04E-10 | -2.54134  |
| NM_016796 | Vamp4,D1ErtD147e                                        | 7.57E-08 | -1.79456  |
| BG871810  | Vamp2,Syb2,Syb-2                                        | 5.04E-08 | -4.1553   |
| AK018783  | Vamp1,Syb1,Syb-1,VAMP-1                                 | 0.00001  | -4.58859  |
| AI788797  | Utrn,DRP,Dmdl,AA589569                                  | 1.36E-06 | -2.21396  |
| BG076275  | Usp53,Sp6,Phxr3,AA939927,mKIAA1350                      | 0.00011  | -2.46267  |
| BM249286  | Usp45,Gcap7,AI843191,3110003C05Rik,4930550B20Rik        | 3.24E-11 | -2.11673  |
| BG075953  | Usp33,Vdu1,AA409780,9830169D19Rik                       | 1.98E-17 | -2.07997  |
| BQ175926  | Usp32,Car4,AW045245,2900074J03Rik,6430526O11Rik         | 8.60E-06 | -1.60168  |
| BM936366  | Usp3,AA409661,BC017156,MGC28886                         | 0.00004  | -1.76039  |
| AI553394  | Usp2,Ubp41,Usp2-45,Usp2-69,B930035K21Rik                | 5.55E-09 | -10.89303 |
| AW536567  | Usp15,Gcap18,AI327321,mKIAA0529,4921514G19Rik           | 0.00003  | -2.6614   |
| BC024355  | Usmg5,2010301L15Rik                                     | 3.00E-06 | -1.70222  |
| AV082188  | Uqrcr2,1500004O06Rik,4930408O21Rik                      | 1.30E-10 | -1.71998  |
| AK004031  | Uqrcr1,MGC97899,1110032G10Rik                           | 0.00008  | -1.75006  |
| NM_026219 | Uqcrb,QPC,QP-C,UQBC,UQBP,UQPC,MGC35665,                 | 1.22E-21 | -1.94687  |
| NM_009472 | Unc5c,rcm,Unc5h3,AI047720,6030473H24,B130051O18Rik      | 2.04E-15 | -3.37088  |
| BQ175168  | Uhmk1,KIS,Kist,AA673513,AI449218,AU021979,4732477C12Rik | 2.82E-20 | -3.54211  |
| NM_011674 | Ugt8a,Cgt,Ugt8,mCerGT,AI850488,AW455908                 | 7.49E-13 | -3.50877  |
| AW146314  | Ugp2,MGC38262                                           | 0.00081  | -1.56649  |
| AV313813  | Uchl5,Uch37,5830413B11Rik                               | 0.00011  | -1.91981  |
| AV174556  | Ubx4,MGC7992,6330407P03Rik                              | 2.07E-27 | -2.358    |
| BQ173927  | Ubr1,AI504731                                           | 2.97E-09 | -1.8621   |
| BF158817  | Ublcp1,MGC7513,BC002236,MGC117826,8430435117Rik         | 0.00035  | -1.55607  |
| BI650739  | Ubl4,Gdx,DXS254E,DXS254Eh,DXHXS254E                     | 0.00005  | -1.57753  |
| AV328436  | Ubl3,HCG,AW108023                                       | 2.59E-13 | -1.97778  |
| BB166188  | Ube3a,Hpve6a,KIAA4216,mKIAA4216,                        | 5.60E-06 | -2.4958   |

|           |                                                       |          |           |
|-----------|-------------------------------------------------------|----------|-----------|
| AV010904  | Ube2v2,MMS2,C81524,AI848315                           | 0.00003  | -2.45162  |
| BE980685  | Ube2n,AL022654,BB101821,1500026J17Rik                 | 1.06E-11 | -2.30029  |
| BF472749  | Ube2j1,Ncube,Ubc6p,Ncube1,0710008M05Rik,1110030I22Rik | 7.76E-07 | -2.09059  |
| AK009276  | Ube2d3,AA414951,1100001F19Rik,9430029A22Rik           | 0.00002  | -1.61768  |
| BG868960  | Ube2a,HR6A,HHR6A,Mhr6a                                | 9.60E-09 | -1.82885  |
| BQ042894  | Ubb,Ubb2,AL033289                                     | 0        | -2.09145  |
| NM_011663 | U2af1-rs1,SP2,35kDa,Irlgs2,D11Ncvs75,U2afbp-rs        | 7.74E-38 | -4.53427  |
| AB000828  | Tyro3,Brt,Dtk,Rse,Sky,Tif,Etk-2,AI323366              | 3.75E-07 | -3.46267  |
| BI662855  | Txnl1,Txnl,32kDa,TRP32                                | 0.00014  | -1.75422  |
| BI790903  | Txncd14,Tmx2,AA589631,2310042M24Rik                   | 1.09E-23 | -2.56723  |
| NM_019742 | Tusc2,PAP,Fus1,Lgcc,Pdap2,AA407686,1190001E22Rik      | 0.00007  | -1.74017  |
| BB268998  | Tulp4,Tusp,1110057P05Rik                              | 1.20E-09 | -4.19232  |
| NM_017379 | Tuba8                                                 | 0.00049  | -7.72829  |
| AW491660  | Tuba4,M[a]4                                           | 1.84E-34 | -12.38026 |
| BB335591  | Ttyh1,tty,4930459B04Rik,6330408P11Rik                 | 2.98E-39 | -5.95492  |
| AA408768  | Ttr,D17860,AA408768,AI787086,MGC107649,prealbumin     | 0.00041  | -8.64503  |
| AU019171  | Ttpa                                                  | 1.08E-06 | -4.4885   |
| AK009255  | Ttl5,R75373,AI428864,mKIAA0998,                       | 0.00017  | -2.12352  |
| BE947764  | Ttc9,AI429215,AI853559,1700029M07Rik                  | 5.25E-24 | -7.12428  |
| BB329157  | Ttc7b,Ttc7I1,AA408451                                 | 1.00E-16 | -9.15926  |
| BB833716  | Ttc3,TPRD,AA409221,D16lum21,KIAA4119,D16lum21e        | 6.91E-10 | -1.73615  |
| BM233968  | Ttc19,AI505442,2010204O13Rik,2810460C24Rik            | 8.42E-06 | -4.40141  |
| AK018641  | Ttc17,pltpaA,D2Bwg1005e,9130020K17Rik                 | 0.00003  | -2.63424  |
| BB118847  | Ttc14,cl-44,AI662468,AU014779,AW561908,KIAA1980,      | 1.08E-10 | -1.66661  |
| BC017540  | Tspyl4,D10Bwg0791e,2610102M01Rik,B230210I21Rik        | 0        | -7.10934  |
| AF042180  | Tspyl1,Tspyl                                          | 4.69E-07 | -2.36451  |
| AK020159  | Tspan9,AU018597,6720474K14Rik,9430079M16Rik           | 3.27E-19 | -15.42064 |
| AV338566  | Tspan7,A15,Mxs1,PE31,Cd231,TALLA,R74651               | 0.00002  | -2.06016  |
| AK015705  | Tspan5,NET-4,Tm4sf9,AU024142,2810455A09Rik            | 0.00017  | -2.67375  |
| NM_019793 | Tspan3,TM4-A,Tm4sf8,Tspan-3,1700055K04Rik             | 8.98E-21 | -1.73321  |
| AK020982  | Tspan2,AW048009,6330415F13Rik,B230119D02Rik           | 0.00004  | -4.33948  |
| AI844703  | Tspan17,Fbxo23,Tm4sf17,AI047581,2210021G21Rik         | 0.00003  | -5.09405  |
| BB807707  | Tspan13,NET-6,Tm4sf13,1100001I23Rik                   | 5.53E-06 | -1.65347  |
| NM_023910 | Tsc22d4,Tilz2,Thg-1pit,0610009M14Rik,1700023B23Rik    | 6.80E-11 | -2.78334  |
| AF201288  | Tsc22d3,DIP,Gilz,Dsip1,TSC-22R                        | 1.15E-07 | -2.09966  |
| BB125842  | Trpm3,MLSN2,LTRPC3,AU018608,9330180E14                | 1.03E-26 | -12.41339 |
| NM_019510 | Trpc3,Trp3,Trpp3,MGC124333                            | 1.39E-29 | -13.89303 |
| BB817939  | Trpc1,Trpp1                                           | 0.0001   | -3.73076  |
| AK003956  | Trp53inp2,1110029F20Rik                               | 0.00003  | -3.41727  |
| BQ174474  | Trim9,AI835002,mKIAA0282,C030048G07Rik                | 1.21E-08 | -3.48662  |
| AK018173  | Trim62,AI450348,6330414G21Rik                         | 6.04E-09 | -6.63476  |
| BB115834  | Trim44,Mc7,Dipb,MGC102054,4930467E23Rik               | 9.87E-09 | -1.83192  |
| NM_024468 | Trim39,tfp,Rnf23,KIAA4179,mKIAA4179                   | 1.02E-11 | -3.53436  |
| BM941778  | Trim37,MUL,TEF3,AI848587,AU043018                     | 1.40E-45 | -5.04777  |
| AF230385  | Trim32,1810045E12Rik                                  | 7.33E-19 | -2.5268   |
| AF220019  | Trim3,HAC1,BERP1,Rnf22                                | 0.00003  | -5.03706  |
| BB466780  | Trim2,narf,KIAA0517,mKIAA0517                         | 4.97E-35 | -2.9083   |
| BB245038  | Trhde,MGC40831,9330155P21Rik                          | 1.44E-16 | -5.95554  |
| BG066452  | Trappc6b,C79212,5830498C14Rik                         | 0.0003   | -1.77816  |
| BC003736  | Trappc3,Bet3,AI835942,AU019197,1110058K12Rik          | 2.36E-07 | -1.68444  |
| AV330821  | Tprt,TPT,mDLP1,2610203G20Rik,2700031G06Rik            | 0.00001  | -1.94151  |

|           |                                                        |          |           |
|-----------|--------------------------------------------------------|----------|-----------|
| NM_009906 | Tpp1,Cln2,TPP-I                                        | 0.00005  | -1.57496  |
| NM_022314 | Tpm3,Tpm5,Tm5NM,Tpm-5,hTMNm,Trop-5,                    | 0.00067  | -2.32167  |
| AW537828  | Tpi1,Tpi,Tpi-1,AI255506                                | 5.58E-23 | -4.34276  |
| BC002036  | Tpd52,mD52,AI043038                                    | 1.32E-07 | -2.02795  |
| BB203106  | Tparl,pFT27,Tpardl,AV026557                            | 0.00034  | -2.48863  |
| BB225670  | Tomm70a,28185,D16lum22                                 | 0.00006  | -1.70331  |
| BG064946  | Tomm20,MAS20,MOM19,                                    | 0.00001  | -1.83051  |
| BB400304  | Tollip,4930403G24Rik,4931428G15Rik                     | 0.00025  | -1.612    |
| AV174616  | Tob2,AV071822,mKIAA1663,2900090N22Rik,4930545K18Rik    | 1.90E-06 | -2.35811  |
| AI315031  | Tns3,TEM6,Tens1,tensin3,BC023928,F830010I22Rik         | 3.67E-14 | -4.09275  |
| NM_009398 | Tnfaip6,Tsg6,TSG-6,Tnfip6                              | 0.00002  | -2.27316  |
| AK017072  | Tmod2,NTMOD,N-Tmod                                     | 0.00009  | -1.84958  |
| NM_021883 | Tmod1,Tmod,E-Tmod,MGC124125,MGC124126                  | 5.91E-06 | -7.25302  |
| NM_020050 | Tmem9b,AW539847,                                       | 3.47E-08 | -1.74394  |
| BC022616  | Tmem66,1810045K07Rik                                   | 0.00023  | -1.65724  |
| AW489972  | Tmem64,AI790744,AV300874,9630015D15Rik                 | 1.62E-06 | -3.0719   |
| BB667368  | Tmem62,C77355,B830009D23Rik                            | 8.11E-37 | -4.02974  |
| BB768133  | Tmem56,AU018104,AW109744,4930577M16Rik,C730036B01Rik   | 4.37E-09 | -5.31884  |
| BC021435  | Tmem55a,AI315591,AV001360,2610319K07Rik                | 0.00001  | -1.66312  |
| BC003277  | Tmem51,BC003277,FLJ10199                               | 3.76E-06 | -3.28093  |
| BC004841  | Tmem50b,AU015466,AU019872,B230114J08Rik                | 4.23E-29 | -5.27412  |
| BC004013  | Tmem49,AI787464,4930579A11Rik                          | 0.00023  | -1.91983  |
| AI505784  | Tmem47,BCMP1,Tm4sf10,AI115536,3010015F07Rik            | 1.40E-45 | -2.93963  |
| BB734748  | Tmem41b,AU018901,MGC38847                              | 4.11E-06 | -2.16822  |
| BB771960  | Tmem33,db83,AA388285,AI314185,                         | 0.00017  | -1.53179  |
| BE986812  | Tmem30a,AW540225,D9Wsu20e,2010200I23Rik                | 1.09E-10 | -2.32213  |
| BB245618  | Tmem25,AI429491,0610039J01Rik                          | 3.81E-22 | -13.32091 |
| BE629162  | Tmem23,MOB,SMS1,Sor1,C80702,                           | 0.0002   | -2.62153  |
| BC026973  | Tmem15,BC026973,MGC36683,mKIAA1094                     | 0.0001   | -2.10565  |
| AW490730  | Tmem10,Tmp10                                           | 0.00003  | -2.33979  |
| BM200437  | Tmem1,Gm870,B230307C21Rik                              | 0.00023  | -1.62774  |
| NM_019790 | Tmeff2,4832418D20Rik                                   | 0.00016  | -1.72828  |
| AK018286  | Tmed8,Gm1184,AI447224,6430595O10Rik                    | 0        | -2.79189  |
| AK004359  | Tmcc2,KIAA0481,1110063G11Rik                           | 2.11E-08 | -3.77445  |
| BB428982  | Tmc7,C230064B05,C630024K23Rik                          | 1.86E-14 | -2.64896  |
| AV378394  | Tm6sf1,AI428514,BC023123,MGC25583,C630016D09Rik        | 0.00002  | -6.47364  |
| AI226757  | Tloc1,HTP1,Dtrp1,SEC62,AI844545,AW545092,3100002M17Rik | 1.27E-12 | -2.23689  |
| BI648366  | Tln1,Tln                                               | 2.60E-08 | -2.00787  |
| BI788452  | Timp4,TIMP-4                                           | 5.80E-33 | -4.17029  |
| BI111620  | Timp3,Timp-3                                           | 6.37E-06 | -2.90272  |
| NM_009384 | Tiam1,AI847750                                         | 7.65E-19 | -8.28251  |
| AV028402  | Thy1,CD90,Thy-1,Thy1.1,Thy1.2,Thy-1.2                  | 5.40E-23 | -38.48092 |
| NM_009381 | Thrsp                                                  | 5.06E-20 | -7.06221  |
| NM_025790 | Them2,RP23-92G13.5,0610006O17Rik                       | 2.80E-13 | -2.70579  |
| BM122301  | Tgfr3,TBRIII,AU015626,AW215636,1110036H20Rik           | 9.04E-07 | -14.40761 |
| BM239615  | Tex2,Taz4,Def-5,AI553404,4930568E07Rik                 | 7.51E-10 | -3.45989  |
| NM_021344 | Tesc,TE-1,MGC117906,1010001A17Rik,2410011K10Rik        | 2.38E-10 | -4.55121  |
| BC017689  | Tef,2310028D20Rik                                      | 5.73E-09 | -2.0707   |
| BC025099  | Tdrd7,AI447470,MGC36668,PCTAIRE2BP,5730495N10Rik       | 6.20E-12 | -5.52638  |
| AI098840  | Tdo2,TO,TDO,AA407491                                   | 1.08E-08 | -6.45822  |
| NM_013688 | Tcte1,Tcte-1,D17SiI1                                   | 2.06E-11 | -2.16726  |

|           |                                                         |          |           |
|-----------|---------------------------------------------------------|----------|-----------|
| NM_013687 | Tcp11,Tcp-11,D17Ken1,MGC107229                          | 0.00013  | -3.16545  |
| AV334599  | Tcfap2b,AI606113,AP-2(beta),E130018K07Rik               | 1.00E-08 | -4.2099   |
| AI019214  | Tceb1,AA407206,AI987979,AW049146                        | 1.69E-06 | -1.89999  |
| BB451404  | Tbc1d8,AD3,VRP,HBLP1                                    | 6.76E-06 | -3.30267  |
| BC023106  | Tbc1d22a,BC023106,MGC28337,D15ErtD781e                  | 0.00091  | -3.01861  |
| AK004440  | Tardbp,C85084,1190002A23Rik                             | 0.00002  | -1.74283  |
| BB272466  | Taok1,AU020252,MGC29021,                                | 5.16E-07 | -2.68988  |
| AK004560  | Tanc1,Tanc,mKIAA1728,1200003E16Rik                      | 2.15E-12 | -10.54163 |
| NM_019754 | Tagln3,Np25,AI426007,2700038H05Rik,2900005O10Rik        | 1.57E-15 | -5.2564   |
| BE862546  | Tacc1,AA960202,4833447E04Rik,B230378H13Rik              | 2.48E-06 | -2.07785  |
| BB559861  | Syt9,Syt5,Sytv                                          | 0.00005  | -3.91559  |
| AI854420  | Syt7                                                    | 8.24E-09 | -6.9659   |
| AV336547  | Syt4,SytIV                                              | 6.87E-36 | -10.07483 |
| NM_009307 | Syt2,R74640,syt II,KIAA4194,mKIAA4194                   | 6.81E-11 | -5.79013  |
| NM_134164 | Syt12                                                   | 0.00016  | -3.90333  |
| BM118245  | Syt1,AW124717,G630098F17Rik                             | 0        | -10.3604  |
| BE333485  | Sypl,Pphn,Pan I,AI314763,AI604763,D12ErtD446e           | 7.99E-07 | -1.53286  |
| NM_009305 | Syp,Syn,p38,AI848995                                    | 2.90E-08 | -3.79775  |
| BB021143  | Synj2bp,ARIP2,OMP25,ARIP2a                              | 0.00008  | -1.70008  |
| BM232846  | Synj1,AA675315,mKIAA0910,A930006D20Rik                  | 1.95E-07 | -4.09186  |
| BB272743  | Syngr1,p29,R75468,Syngr1b                               | 7.20E-22 | -4.40569  |
| AV237615  | Syne1,8B,CPG2,Myne1,SYNE-1                              | 2.93E-07 | -5.78031  |
| BM936504  | Syn2,AI836018,AI841723,2900074L19Rik                    | 9.03E-11 | -4.82727  |
| NM_011517 | Sycp3,Cor1,Scp3                                         | 1.30E-06 | -4.14858  |
| AV275615  | Sycp1,SCP1                                              | 6.54E-12 | -3.71839  |
| NM_022814 | Svep1,Polydom,AA387071,1110021D17Rik,                   | 0.00009  | -5.87074  |
| BB269117  | Sv2b,AI850768,MGC38746,mKIAA0735,A830038F04Rik          | 0.00005  | -1.74727  |
| BC026494  | Sv2a,AI746429,mKIAA0736                                 | 1.20E-10 | -6.08341  |
| BF455403  | Susd4,N28096,AI848994,MGC30368,E430021N18Rik            | 0.00047  | -4.07021  |
| NM_013677 | Surf1,Surf-1,0610010F23Rik                              | 1.09E-07 | -2.17277  |
| BB401995  | Suhw2,D10Jhu82e                                         | 0.00009  | -1.89902  |
| AK005273  | Sucla2,4930547K18Rik                                    | 7.54E-23 | -1.84632  |
| BB362499  | Stxbp5i,LLGL4,tomosyn-2,9430094L02,A830015P08Rik        | 1.89E-19 | -2.78515  |
| NM_011504 | Stxbp3a,Stxbp3,Sxtbp3,MGC86097,Munc-18c                 | 4.19E-07 | -2.5541   |
| AF326545  | Stxbp1,Ms10g,nsec1,N-sec1,Sxtbp1,Unc18h,                | 9.82E-17 | -4.20023  |
| AB019212  | Stx7,Syn7,AI315064,AI317144,AW107239                    | 7.83E-06 | -1.51178  |
| D29797    | Stx3,AA960228,AV006285,AW536415                         | 4.95E-06 | -2.39397  |
| BQ175482  | Stx1b2,SYN1B,Stx1b                                      | 0.00001  | -6.19946  |
| BG519214  | Strn,AU022939,D130055P19                                | 3.07E-06 | -2.41926  |
| NM_009133 | Stmn3,Sclip,R75323,AI604839,9330161A03Rik               | 0.00003  | -1.92777  |
| BM115022  | Stmn2,SCG10,Stmb2,Scgn10,AI159727                       | 2.81E-33 | -2.45622  |
| BG919998  | Stk39,DCHT,SPAK,AW227544,AW556857                       | 0.00022  | -2.59764  |
| BB476811  | Stk38l,Ndr2,Ndr54,B230328I19,4930473A22Rik              | 0.00072  | -1.89406  |
| AK015015  | Steap2,STMP,IPCA1,IPCA-1,STAMP1                         | 6.79E-15 | -6.07413  |
| BC024319  | Stat5b                                                  | 4.77E-07 | -4.4758   |
| NM_019990 | Stard10,PCTP2,Pctpl,CGI-52,PC-TP2,                      | 6.76E-08 | -2.60641  |
| NM_013666 | St8sia5,Siat8e,ST8SiaV,MGC41119                         | 3.85E-17 | -6.98062  |
| BB028302  | St6galnac6,Siat7f                                       | 3.84E-06 | -3.50506  |
| BB532866  | St3gal6,Siat10,AI930218,AW552396,St3galVI,1700023B24Rik | 1.36E-07 | -2.58899  |
| BB829192  | St3gal5,3S-T,[a]2,Siat9                                 | 3.07E-06 | -2.23588  |
| BB750118  | St3gal2,Siat5,AI429591,AW822065,ST3Gall                 | 8.49E-12 | -5.16127  |



|           |                                                         |          |           |
|-----------|---------------------------------------------------------|----------|-----------|
| AV347235  | St18,NZF-3,AV348974,mKIAA0535                           | 5.46E-06 | -1.56607  |
| NM_138744 | Ssx2ip,Adip,AU014939,AU042321                           | 0.00022  | -2.09073  |
| AY037837  | Ssbp2,SSDP2,Hspc116,AU067692,                           | 1.18E-12 | -2.60595  |
| BM210600  | Srxn1,Srx,Npn3,TX01,AI854065,AW488194,1700127B04Rik     | 1.21E-06 | -2.40769  |
| BB335578  | Srrp,B830039L16                                         | 0.0003   | -3.00644  |
| AK002636  | Srr,Srs                                                 | 0.00062  | -1.82483  |
| BB127386  | Srpk2,Wbp6,mSRPK2,AW226533,AW492537,AW547358            | 7.87E-06 | -1.67668  |
| AK008404  | Sri,Sor,2210417O06Rik                                   | 6.11E-07 | -3.32747  |
| AF481964  | Srgap3,Gbi,WRP,MEGAP,AI452337,Arhgap14,                 | 1.09E-15 | -4.33149  |
| AK005172  | Srgap2,FBP2,Fnbp2,srGAP3,AI448945,9930124L22Rik         | 2.83E-06 | -2.47205  |
| BM232298  | Sqstm1,Osi,p62,A170,STAP,OSF-6                          | 1.17E-06 | -1.63169  |
| NM_027141 | Spsb3,SSB3,Tce1,KIAA4204,mKIAA4204                      | 0.00099  | -2.39726  |
| BB529691  | Spry2,sprouty2                                          | 0.00002  | -1.69473  |
| BQ044290  | Spred1,AL024345,AW047647,5730461F13Rik                  | 7.74E-12 | -2.2174   |
| BB815380  | Spop,TEF2,Pcif1,AI315626                                | 7.76E-22 | -3.52055  |
| BC020531  | Spon1,AI666765,AW455831,BC020531,D330035F22Rik          | 0.00066  | -2.58861  |
| NM_023689 | Spock3,AI428471,KIAA4039,mKIAA4039,2900045C01Rik        | 0        | -14.74318 |
| BM117672  | Spock2,AA407235,mKIAA0275                               | 9.36E-12 | -6.15342  |
| BB308491  | Spock1,Spock,Ticn1,testican                             | 1.56E-22 | -11.73781 |
| AF026489  | Spnb3,KIAA0302,MGC99874,mKIAA0302                       | 6.90E-08 | -4.2705   |
| BQ174069  | Spnb2,elf1,elf3,SPTB2,SPTBN1,Spnb-2,AL033301            | 6.97E-15 | -2.45186  |
| AK011566  | Spna2,brain,Spna-2,2610027H02Rik                        | 0.00002  | -2.39427  |
| AF099020  | Spint2,HAI-2,C76321,AL024025                            | 0.00046  | -5.0622   |
| BQ175052  | Specc1,KIAA4061,mKIAA4061,                              | 4.92E-28 | -5.24779  |
| NM_010097 | Sparcl1,Sc1,Ecm2,hevin,mast9                            | 0        | -9.80126  |
| NM_009242 | Sparc,BM-40,AA517111                                    | 0.00002  | -2.92951  |
| NM_012031 | Spag1,tpis                                              | 0.00003  | -6.54624  |
| U31967    | Sox2,lcc,ysb,Sox-2                                      | 0.00007  | -1.81118  |
| Z11664    | Sos2                                                    | 0.00008  | -1.94203  |
| AV247637  | Sort1,Ntr3,Ntr3,AI852375,2900053A11Rik                  | 0.00001  | -2.21646  |
| BI648081  | Sorl1,LR11,gp250,mSorLA,AI596264,AW261561,2900010L19Rik | 8.58E-10 | -7.02359  |
| AK018111  | Sorcs3,AW045579,6330404A12Rik                           | 5.63E-08 | -2.95542  |
| BB251748  | Sorbs2,Argbp2,mKIAA0777,A530071H08,9430041O17Rik        | 0.00002  | -2.66765  |
| NM_013671 | Sod2,MnSOD,Sod-2,MGC6144                                | 5.63E-06 | -1.64624  |
| AA510713  | Socs5,Cish5,KIAA0671,mKIAA0671,1810018L08Rik            | 1.77E-08 | -1.79532  |
| BB320376  | Snx30,MGC106086,4732481H14Rik,C030041J06Rik             | 0.00068  | -1.80849  |
| BB815008  | Snx16,AI117577,AI747675,4930522N22Rik                   | 0.0008   | -1.74848  |
| BB404318  | Snx14,YR-14,B830022K16,C330035N22Rik                    | 9.25E-08 | -2.37669  |
| AV377013  | Snx13,mKIAA0713                                         | 1.25E-16 | -2.50545  |
| NM_033174 | Snurf,Snrpn,MGC18604,MGC30325,2410045I01Rik             | 6.69E-07 | -4.27746  |
| BB709603  | Snrpn,SMN,Peg4,HCERN3,MGC18604,MGC30325,2410045I01Rik   | 0.00002  | -2.60766  |
| BC020189  | Snrk,R74830,AI448042,AW547029,MGC28970                  | 2.71E-23 | -5.95708  |
| BQ174936  | Snph,AW045671,AW556958,AW743098,mKIAA0374               | 0.00014  | -5.89816  |
| NM_033610 | Sncb,betaSYN,AI838531                                   | 1.03E-14 | -5.3066   |
| BM214097  | Snap91,91kDa,AP180,F1-20,mKIAA0656                      | 0.00076  | -4.56331  |
| BE952593  | Snap25,sp,25kDa,SNAP-25                                 | 0.00055  | -4.65414  |
| NM_025357 | Smpx,Csl,1010001C09Rik                                  | 2.55E-14 | -7.93932  |
| NM_011421 | Smpd1,ASM,aSMase,A-SMase                                | 0.00012  | -2.88562  |
| NM_025891 | Smarcd3,BAF60C,1500001J14Rik,2210409C08Rik              | 0.00003  | -3.8827   |
| NM_031878 | Smarcd2,Baf60b,AW322457                                 | 3.60E-10 | -2.01479  |
| BB028226  | Smarcal1,Mharp,6030401P21Rik                            | 0.00005  | -1.7813   |

|           |                                                          |          |           |
|-----------|----------------------------------------------------------|----------|-----------|
| AK011935  | Smarca2,brm,Snf2l2,brahma,SNF2alpha,2610209L14Rik        | 2.30E-09 | -2.15808  |
| NM_133716 | Smap1l,AA408614,1810031K02Rik                            | 0.00002  | -2.62618  |
| BC006946  | Smap1,Al462175,1700056O10Rik,4921514B13Rik,4921525H11Rik | 0.00015  | -1.54481  |
| BB241324  | Smad7,Madh7                                              | 1.11E-07 | -2.70367  |
| BB473571  | Smap,Slap,KIAA1601,mKIAA1601,D330001L02Rik               | 0.00022  | -2.27529  |
| BI111765  | Slk,9A2,Etk4,SMAK,Stk2,mSLK,AV021402,AW411554,mKIAA0204  | 7.51E-07 | -2.27493  |
| BB357579  | Slitrk4,6430513G13,D930039I09Rik                         | 0        | -13.28163 |
| AK014285  | Slitrk1,3200001I04Rik                                    | 1.36E-14 | -3.22037  |
| AV348121  | Slco4a1,OATP-E,MGC28799,MGC28824,Slc21a12                | 3.90E-15 | -10.57703 |
| BM237089  | Slco3a1,Anr1,MJAM,OATP-D,R75096,Slc21a11,5830414C08Rik   | 0.00003  | -3.44998  |
| BB611738  | Slc9a6,mKIAA0267,3732426M05,6430520C02Rik                | 7.08E-12 | -2.22049  |
| BG066200  | Slc9a3r1,EBP-50,NHE-RF,NHERF-1,MGC95776                  | 0.00005  | -2.76224  |
| AV361504  | Slc8a3,Ncx3,AW742262,MGC90626                            | 1.96E-06 | -11.11044 |
| BM123508  | Slc8a1,Ncx1,MGC90693,D930008O12Rik                       | 2.34E-10 | -4.42809  |
| AI790191  | Slc7a8,LAT2,AA408822                                     | 3.04E-06 | -5.25348  |
| AI429745  | Slc7a14,BC061928,A930013N06                              | 3.77E-14 | -5.91342  |
| NM_017394 | Slc7a10,Asc-1,AL024237,D7Bwg0847e                        | 0.00095  | -2.61313  |
| BG069516  | Slc6a8,CRT,CT1,CRTR,Creat,AA589632                       | 9.69E-10 | -2.67841  |
| BQ176194  | Slc6a5,Glyt2                                             | 9.91E-08 | -4.48809  |
| AV340147  | Slc6a17,Ntt4,AW490886,D130012J15Rik                      | 3.93E-10 | -5.04197  |
| BB129409  | Slc6a15,AA536730,Al326450,Al326451                       | 3.42E-11 | -3.8164   |
| M92378    | Slc6a1,Gabt,Gat1,XT-1,Gabt1,Xtrp1,GABATR,                | 5.01E-31 | -5.74048  |
| AF208031  | Slc5a1,Sglt1                                             | 0.00006  | -2.02667  |
| BE655147  | Slc4a4,NBC,Al835705                                      | 3.28E-15 | -4.29577  |
| NM_009208 | Slc4a3,Ae3,A930038D23Rik                                 | 0.00002  | -4.7624   |
| NM_033552 | Slc4a10,NCBE,KIAA4136,mKIAA4136                          | 0        | -41.02315 |
| BF134253  | Slc41a1,Al573938,B230315F01Rik                           | 0.00001  | -1.83441  |
| AW046938  | Slc39a12,Gm731,AW046938,MGC102235                        | 1.57E-10 | -5.24578  |
| BF165681  | Slc38a1,NAT2,AA408026,AA409865,AL022800,AU015942         | 3.99E-07 | -1.72904  |
| AK017918  | Slc36a1,Pat1,Al839897,5830411H19Rik                      | 0.00045  | -3.26221  |
| BB427860  | Slc35f3,B230375D17Rik                                    | 1.52E-16 | -4.5516   |
| C86506    | Slc35a5,AU021179,BB097433,                               | 3.93E-07 | -1.54602  |
| NM_009508 | Slc32a1,VGAT,Viaat,R75019                                | 3.74E-18 | -14.8239  |
| BB117951  | Slc30a9,HUEL,GAC63,AL024256,2310024J23Rik                | 0.00002  | -1.95376  |
| BB414515  | Slc2a3,Glut3,C78366,Glut-3,AA408729,                     | 3.95E-25 | -2.47178  |
| BM209618  | Slc2a1,Glut1,Glut-1                                      | 1.41E-10 | -3.68833  |
| BM207588  | Slc2a1,Glut1,Glut-1                                      | 7.42E-11 | -3.94868  |
| BF225398  | Slc25a4,Ant1,AU019225                                    | 3.63E-20 | -1.85906  |
| NM_133668 | Slc25a3,PTP,Phc,5730556H19Rik                            | 6.69E-08 | -1.82055  |
| AK018760  | Slc25a22,Al060884,1300006L01Rik                          | 0.00065  | -3.42913  |
| NM_011398 | Slc25a14,UCP5,BMCP1,UCP5L,UCP5S                          | 0.00003  | -2.46119  |
| AK019150  | Slc25a12,Al839531,2610002D09Rik                          | 5.27E-06 | -1.93826  |
| BC017615  | Slc24a3,NCKX3                                            | 3.59E-11 | -13.05045 |
| BB375376  | Slc24a2,2810021B17Rik                                    | 0.00014  | -4.19984  |
| NM_018824 | Slc23a2,NBTL1,SVCT2,YSPL2,Slc23a1,Al844736,mKIAA0238     | 1.35E-17 | -2.07089  |
| BB765719  | Slc20a2,Pit2,Ram1,Pit-2,Ram-1,MolPit2                    | 3.14E-08 | -3.43858  |
| NM_015747 | Slc20a1,Glvr1,Glvr-1,Al607883                            | 6.99E-39 | -3.25256  |
| NM_009200 | Slc1a6,EAAT4                                             | 2.72E-16 | -36.17905 |
| BB085413  | Slc1a3,Gmt1,Eaat1,GLAST,GLU-T,Glut-1                     | 1.21E-15 | -2.40869  |
| BQ175176  | Slc17a7,Vglut1,Al851913,2900052E22Rik                    | 5.60E-06 | -6.22989  |
| AW556396  | Slc14a1,UT-B,2610507K20Rik,3021401A05Rik                 | 0.00041  | -2.43153  |

|           |                                                               |          |           |
|-----------|---------------------------------------------------------------|----------|-----------|
| BB497312  | Slc13a3,NaDC3,SDCT2,NaDC-3                                    | 7.75E-07 | -3.33979  |
| BF468072  | Slc12a5,KCC2,mKIAA1176                                        | 0.0007   | -5.70983  |
| BB031119  | Sla,Slap,Slap-1                                               | 7.31E-06 | -8.5409   |
| NM_022433 | Sirt3,Sir2l3,AI848213,2310003L23Rik                           | 6.24E-10 | -3.34305  |
| BM936013  | Sipa1l1,AW213287,mKIAA0440,4931426N11Rik                      | 1.94E-11 | -6.64143  |
| AI449329  | Sidt1,AW045928,B830021E24Rik                                  | 0.00013  | -4.50586  |
| NM_021423 | Shank3,Shank3b,AI841104                                       | 6.82E-10 | -8.98858  |
| AI481067  | Sh3glb2,mKIAA1848                                             | 0.00015  | -2.53485  |
| AF326561  | Sh3gl2,SH3PA,EEN-B1,Sh3d2a,                                   | 5.14E-09 | -2.75835  |
| NM_015825 | Sh3bgr                                                        | 6.23E-11 | -11.01175 |
| BC017611  | Sgtb,MGC27660,C630001O05Rik                                   | 4.67E-12 | -2.24997  |
| AW551517  | Sgpp2                                                         | 0.00001  | -1.94045  |
| BQ176371  | Sgpp1,SPP,SPP1,Spph1,mSPP1,AI463453                           | 0.00012  | -1.66195  |
| AK019337  | Sgne1,7B2,Sgne-1,AI325031                                     | 0.00004  | -2.00253  |
| NM_011361 | Sgk,Sgk1                                                      | 1.09E-31 | -4.71972  |
| AK014022  | Sgip1,gag,3110007P09Rik                                       | 0.00003  | -2.04045  |
| BB379739  | Sfxn5,C230001H08Rik                                           | 3.37E-17 | -3.26307  |
| BB278628  | Sfrs8,SWAP,AI197402,1190005N23Rik,6330437E22Rik               | 0.0003   | -1.6611   |
| AW121511  | Sez6l2,Psk1,BSRP-A,AI835913,AW121566,MGC19060,MGC90604        | 1.50E-08 | -5.60823  |
| BM114815  | Set7,mKIAA1717,1600028F23Rik                                  | 2.75E-10 | -2.13344  |
| NM_030261 | Sesn3,SEST3,MGC7182,BC003348,5630400E15Rik                    | 2.94E-07 | -1.97084  |
| BG076140  | Sesn1,PA26,SEST1,AU044290,MGC118148,1110002G11Rik             | 0.00017  | -1.97251  |
| NM_009250 | Serpini1,PI12,Spi17,AI837402                                  | 7.25E-17 | -4.34786  |
| NM_011340 | Serpinf1,Pedf,Sdf3,EPC-1,Pedf1,AI195227                       | 0.00009  | -2.31238  |
| AF426025  | Serpinb1b,EIB,Serpin1b1,ovalbumin,6330533H24Rik,RP23-391111.5 | 0.00024  | -3.63544  |
| AF426024  | Serpinb1a,EI,EIA,LEI,PI2,MNEI,M/NEI                           | 4.62E-08 | -5.61513  |
| BM239422  | Serinc1,Tde2,Tms2,TMS-2,Tde1l,AI315070,                       | 6.07E-09 | -2.36017  |
| AV219419  | Sept7,Cdc10,KIAA4020,mKIAA4020,E430034N22                     | 0.00059  | -1.63365  |
| NM_019942 | Sept6,Sept6,KIAA0128,mKIAA0128,2810035H17Rik,                 | 1.65E-10 | -2.84438  |
| AF033350  | Sept5,Pnutl1,Cdcrel1,Cdcrel-1                                 | 0.00008  | -3.22163  |
| AW208509  | Sept4,Bh5,Pnutl2                                              | 1.15E-22 | -3.59345  |
| AV229846  | Sept11,AW548875,D5Erd606e,6230410I01Rik                       | 6.05E-06 | -1.95736  |
| AY043488  | Sepm,SelM,A230103K18,1500040L08Rik                            | 3.18E-33 | -5.38316  |
| AV317107  | Senp2,SUMO-1,Smt3ip2,AI646780                                 | 0.00002  | -1.95495  |
| BB462688  | Sema6d,AA409156,Sema6D-1,                                     | 7.98E-15 | -2.95913  |
| AV375653  | Sema5a,semF,Semaf,AI464145,5930434A13,9130201M22Rik           | 0.00031  | -2.65809  |
| NM_009152 | Sema3a,SemD,SEMA1,Semad,coll-1,Hsema-l                        | 0.00002  | -2.33711  |
| BC026816  | Sel1h,AW493766,KIAA4137,mKIAA4137                             | 0.00036  | -1.89563  |
| BQ175529  | Sec22l1,C81333,ERS-24,Sec22b,AI480645,4930564D15Rik           | 0.00036  | -1.50743  |
| BI652727  | Sec14l1,1200017E04Rik,2810012L19Rik                           | 2.11E-10 | -3.27168  |
| AK007641  | Sec11l3,1810029G24Rik                                         | 1.44E-08 | -2.23534  |
| BF585357  | Sdha,FP,SDH2,SDHF,C81073,4921513A11,2310034D06Rik             | 4.35E-25 | -2.2672   |
| BB183534  | Sdfr1,AW554172                                                | 1.48E-09 | -1.90553  |
| BG064675  | Sdf4,Cab45                                                    | 3.37E-31 | -5.77427  |
| BC005679  | Sdc4,Synd4,AA959608,AW108331,ryudocan,syndecan-4              | 0.0003   | -4.91946  |
| AU016501  | Scyl1,Ntkl,p105,C85140,2810011O19Rik                          | 0.00055  | -3.38294  |
| BM211317  | Scrn3,Ses3,AI427019,AV002033,4833415E20Rik                    | 0.00048  | -2.1808   |
| AW490544  | Scrn1,SES1,AI852905,KIAA0193,mKIAA0193,                       | 0.00056  | -6.62107  |
| C76618    | Scp2,SCPx,SCP-2,C76618,C79031,NSL-TP,ns-LTP,                  | 1.78E-06 | -2.38049  |
| NM_019708 | Scoc,AA415030,0610011C06Rik,2810002J11Rik                     | 2.26E-06 | -1.9698   |
| BB429612  | Scn8a,dmu,med,nmf2,seal,NaCh6,nmf58,Nav1.6,                   | 0.0002   | -2.53608  |

|           |                                                      |          |           |
|-----------|------------------------------------------------------|----------|-----------|
| BE993937  | Scn4b,Gm1471                                         | 6.06E-11 | -10.3047  |
| BE955837  | Scn3a,Gm1000,Nav1.3                                  | 1.06E-09 | -6.58273  |
| AK013326  | Scn2b,Gm183,MGC116602,2810451E09Rik                  | 0.00075  | -11.37628 |
| BC009652  | Scn1b                                                | 3.75E-11 | -6.42933  |
| BI731739  | Scn1a,Nav1.1                                         | 2.60E-16 | -8.26725  |
| NM_013928 | Schip1,Nf2ip,SCHIP-1                                 | 2.84E-10 | -1.84277  |
| NM_009130 | Scg3,Chgd,SgIII,1B1075,AI385542                      | 1.97E-13 | -1.78738  |
| NM_009129 | Scg2,Chgc,SgII                                       | 9.85E-28 | -11.96433 |
| BE133651  | Scd3,4930513N16Rik                                   | 4.18E-08 | -6.5441   |
| BG060909  | Scd1,ab,SCD,Scd-1,AA589638,AI265570                  | 2.04E-07 | -2.79966  |
| BC018613  | Scamp5,Sc5,AI426171,AW558254                         | 0.00019  | -1.81444  |
| BB704235  | Scamp1,AI415563,AW122395,4930505M11Rik               | 0.00003  | -2.22191  |
| AU067703  | Sc5d,A830037K02,A830073K23Rik                        | 0.00009  | -1.85754  |
| BC025837  | Sbk1,Sbk                                             | 8.37E-06 | -2.23485  |
| BB773592  | Sbds,SDS,CGI-97,AI836084,4733401P19Rik               | 0.0001   | -1.58514  |
| AW107196  | Samd4,1700024G08Rik,1700111L17Rik,4933436G17Rik      | 5.61E-09 | -2.73214  |
| NM_030692 | Sacm1l,SAC1,Sac1p,mKIAA0851                          | 5.65E-23 | -2.44289  |
| NM_009115 | S100b,Bpb,AI850290,MGC74317                          | 1.35E-11 | -4.36456  |
| AW552101  | Ryr2,9330127120Rik                                   | 0.00007  | -4.29266  |
| NM_023868 | Ryr2,9330127120Rik                                   | 1.04E-22 | -7.255    |
| BM508396  | Rtn4rl1,Ngr3,Ngrh2,Ngrl2                             | 9.65E-06 | -7.13572  |
| AK003859  | Rtn4,ASY,NOGO,NSP-CL                                 | 2.77E-23 | -2.18015  |
| AI503514  | Rsn,CYLN1,C81039,Clip50                              | 1.29E-08 | -3.83719  |
| BB354941  | Rragd,AI467523,D4Etd174e,5730543C08Rik,C030003H22Rik | 0.00017  | -2.86968  |
| AI118026  | Rraga,RAGA,FIP-1,AI255374,1300010C19Rik              | 5.08E-08 | -1.70038  |
| BQ174267  | Rps6ka5,MSK1,RLPK,MSPK1,                             | 8.39E-08 | -1.84913  |
| NM_009097 | Rps6ka1,rsk,Rsk1,p90rsk                              | 6.70E-17 | -8.68975  |
| AV037157  | Rps29                                                | 5.64E-07 | -1.50138  |
| BF453369  | Rpl17,MGC103289,MGC118163                            | 0.0003   | -5.05181  |
| BM898651  | Rph3a,AU022689,AW108370,2900002P20Rik                | 1.07E-07 | -6.07703  |
| BB751387  | Rorb,RZRB,Nr1f2,MGC38728,RZR-beta                    | 2.37E-10 | -3.26572  |
| BB050663  | Rora,sg,ROR1,ROR2,ROR3,Nr1f1,staggerer,9530021D13Rik | 3.52E-06 | -1.78176  |
| AK012979  | Ror1,mRor1,Ntrkr1,2810404D04Rik                      | 0.00025  | -2.81608  |
| BB761686  | Rock2,Rock-II,mKIAA0619,B230113H15Rik                | 1.43E-11 | -1.99928  |
| BI738010  | Rnf6,AA537053,1200013I08Rik,5730419H05Rik            | 4.65E-06 | -2.246    |
| BB824091  | Rnf39,LIRF,Gm320,Gm1786,Gm1787,BC038661              | 0.00087  | -2.315    |
| BB428822  | Rnf182,MGC107143,C630023L15Rik                       | 1.58E-11 | -17.36008 |
| NM_026518 | Rnf146,2610509H23Rik                                 | 0.00037  | -1.54102  |
| NM_020012 | Rnf14,Triad2,AA986456,AU041447                       | 5.14E-18 | -2.04008  |
| BE948550  | Rnf130,GP,G1rp,G1RZFP,GOLIATH,2510042A13Rik          | 0.00032  | -3.51771  |
| AK004847  | Rnf128,GRAIL,Greul1,AI987883,1300002C13Rik           | 1.20E-09 | -5.85822  |
| BB765679  | Rnf123,Kpc1,BC003945                                 | 0.00012  | -7.64732  |
| BI150320  | Rnf11                                                | 1.33E-13 | -1.88665  |
| NM_009543 | Rnf103,kf-1,Zfp103,AW146237,AW212918                 | 0.0002   | -1.52481  |
| BB271919  | Rit2,Rin,RIBA,Roc2                                   | 0        | -6.75712  |
| BB435342  | Ripk5,C820013G01,A930019K20Rik,C430014H23Rik         | 3.29E-09 | -3.39449  |
| BB049544  | Rims4,Rim4,6530406L02                                | 3.87E-07 | -5.2204   |
| AW491516  | Rims3,Nim3,Rim3,mKIAA0237,A730060M23Rik              | 9.04E-10 | -8.07001  |
| NM_053271 | Rims2,RIM2,Serg2,Rab3ip2,                            | 1.13E-19 | -2.75346  |
| BQ044278  | Rims1,Rim,RIM1,RIM1a,                                | 0        | -11.30896 |
| AK017440  | Rian,5530401N18Rik                                   | 1.07E-11 | -5.28184  |

|           |                                                         |          |           |
|-----------|---------------------------------------------------------|----------|-----------|
| BF228009  | Rhpn2,C85860,AA536890,D7ErtD784e,1300002E07Rik          | 0.00061  | -3.74721  |
| NM_053075 | Rheb                                                    | 1.99E-07 | -1.71646  |
| BC021549  | Rhbdl1,Rhbdl,MGC28800                                   | 0.00016  | -3.92797  |
| AK018337  | Rgs8,6530413N01Rik                                      | 0        | -36.31441 |
| NM_011880 | Rgs7                                                    | 2.14E-33 | -4.00714  |
| AF215669  | Rgs3,C2pa,RGS3S,PDZ-RGS3,C2PA-RGS3,4930506N09Rik        | 0.00004  | -4.47269  |
| NM_026418 | Rgs10,MGC129414,2310010N19Rik                           | 0.00008  | -1.8757   |
| BF471533  | Ret,PTC,RET9,RET51                                      | 0.00006  | -3.57789  |
| NM_009049 | Resp18,AI851012                                         | 4.62E-06 | -7.93344  |
| BM899236  | Reps2,POB1                                              | 0        | -7.58798  |
| NM_023697 | Rdh14,PAN2,AW215439,3110030G19Rik                       | 3.42E-06 | -2.96451  |
| AB030503  | Rdh11,Mdt1,Psdr1,SCALD,                                 | 0.00034  | -1.65961  |
| BC025874  | Rbbp6,C77662,AI316869,MGC32263,4933422O15Rik            | 1.40E-08 | -2.756    |
| BE570980  | Rb1cc1,Cc1,FIP200,                                      | 0.00003  | -1.69526  |
| BB381618  | Rasl10b,Gm729,VTS58635,B230331P10Rik                    | 0.00009  | -6.58802  |
| BE691356  | Rasgrp1,Rasgrp                                          | 3.70E-19 | -13.15875 |
| AF169826  | Rasgrf1,Grf1,p190,CDC25,P190-A,CDC25Mm,Grfbeta,Ras-GRF1 | 3.43E-14 | -4.08089  |
| BI134758  | Rasgef1a,AI835194,6330404M18Rik                         | 2.59E-17 | -4.5897   |
| NM_009025 | Rasa3,C86362,GAPIII,AI326412,E130011G04                 | 5.80E-08 | -2.66579  |
| BM230524  | Rapgef5,GFR,Mrgef,C86120,                               | 0.00008  | -2.64694  |
| AK004874  | Rapgef4,Epac2,KIAA4040,                                 | 0        | -12.67544 |
| AK018008  | Rapgef2,Pdzgef1,mKIAA0313,5830453M24Rik                 | 2.22E-07 | -1.74389  |
| AW489945  | Rap2ip,Rpip8                                            | 3.66E-06 | -3.08762  |
| BC011279  | Rap1gds1,GDS1,BC011279,MGC18981                         | 8.92E-08 | -2.43187  |
| AK005063  | Rap1ga1,Rap1GAP,AI427470,1300019I11Rik,2310004O14Rik    | 5.31E-10 | -18.3557  |
| NM_019511 | Ramp3,AI850306                                          | 1.22E-07 | -4.0503   |
| BF537798  | Ramp2                                                   | 1.66E-08 | -2.32637  |
| NM_016894 | Ramp1                                                   | 0.00052  | -2.57772  |
| AU040322  | Rai16,G430067P06Rik                                     | 0.00004  | -1.72114  |
| NM_009010 | Rad23a,mHR23A,AL024030,2310040P19Rik                    | 0.00047  | -4.16313  |
| BB280137  | Rabgef1,Rin2,Rab5ef,Rabex5                              | 3.34E-07 | -2.08395  |
| AW488249  | Rabgap1,Gapcena,KIAA4104,MGC30493,mKIAA4104             | 0.00042  | -1.70584  |
| L40934    | Rabac1,PRA1,Gbpap1,prenylin,2310040I06Rik               | 1.78E-08 | -2.87447  |
| BB084626  | Rab9b,MGC130383,9330195C02Rik                           | 9.18E-06 | -2.77579  |
| BC022119  | Rab6ip1,ORF37,AJ245569,AW496491,mKIAA1091,1500012B19Rik | 1.05E-20 | -1.89294  |
| AV334024  | Rab6,AA419671,2610028L11Rik                             | 2.04E-15 | -2.09531  |
| NM_025887 | Rab5a,AI663973,AU021172,2410015H04Rik                   | 4.50E-10 | -1.68061  |
| BC007147  | Rab4b,1500031G17Rik                                     | 0.00003  | -2.01484  |
| NM_009003 | Rab4a,Rab4,AI848268                                     | 1.69E-06 | -4.31692  |
| BG063904  | Rab3gap1,Rab3gap,AL117896,1700003B17Rik,4732493F09Rik   | 2.26E-14 | -1.95238  |
| AV344962  | Rab3a                                                   | 2.70E-13 | -2.7814   |
| NM_021411 | Rab37,B230331O03Rik,B230354I04Rik                       | 0.00064  | -3.00951  |
| AK004974  | Rab33b                                                  | 2.45E-07 | -2.43593  |
| NM_011228 | Rab33a,Rabs10,MGC129488,MGC129489                       | 0.00059  | -2.12454  |
| BB025283  | Rab27a,ash,2210402C08Rik,2410003M20Rik,4933437C11Rik    | 0.00003  | -3.592    |
| BB767504  | Rab21,9630024B22                                        | 0.00003  | -1.99766  |
| BM234596  | Rab2,C80220,9330148M11Rik                               | 4.44E-07 | -1.55862  |
| NM_134050 | Rab15,AI840042,2310012G06Rik                            | 8.65E-17 | -5.7667   |
| BQ177085  | Rab11fip5,GAF1,RIP11,C75969,D6ErtD32e,mKIAA0857         | 0.00091  | -1.95008  |
| BE945631  | R74740                                                  | 1.98E-08 | -3.22259  |
| NM_021881 | Qk,Qkl,I17Wis1,1500005P18,I(17)-1Wis                    | 4.03E-10 | -2.54987  |

|           |                                                               |          |           |
|-----------|---------------------------------------------------------------|----------|-----------|
| BB221333  | Qdpr,Dhpr,PKU2,D5ErtD371e,2610008L04Rik                       | 0.00002  | -1.54509  |
| NM_011224 | Pygm,AI115133                                                 | 0.00076  | -3.48801  |
| AW547988  | Pygb,MGC36329                                                 | 0.00009  | -3.39907  |
| BC016131  | Pxx,MONaKA,D14ErtD813e,C230080L11Rik                          | 0.00052  | -1.68237  |
| NM_013645 | Pvalb,PV,Pva                                                  | 0        | -38.87202 |
| NM_008989 | Pura,CAGER-1,ssCRE-BP,Pur-alpha                               | 0.00006  | -2.04586  |
| BC002298  | Ptprz1,Ptpz,Ptprz,PTPbeta,PTPzeta,AI850339,DSD-1-PG,Rptpbeta  | 1.36E-09 | -2.06652  |
| AF129509  | Ptpr, Gmcp1,PTP-SL,PTPBR7,mPTP213                             | 0        | -12.35956 |
| NM_008984 | Ptprm,RPTPmu,KIAA4044,MGC90724,mKIAA4044                      | 9.91E-11 | -5.9888   |
| AI893646  | Ptprk,AI853699                                                | 0.0001   | -1.78953  |
| AI116234  | Ptprj,BET,Byp,Sccl,CD148,DEP-1,Ptpb2,Sccl-1,AI450271,PTPbeta2 | 2.25E-07 | -2.81434  |
| U35368    | Ptpre,PTPe,PTPepsilon                                         | 1.22E-12 | -3.74646  |
| AB018194  | Ptpns1,Bit,P84,SIRP,SHP-1,CD172a,SHPS-1,AI835480              | 0.00059  | -2.22512  |
| AV231357  | Ptpn3,PTPCL,9530011I20Rik                                     | 9.13E-12 | -3.13566  |
| NM_008979 | Ptpn22,PEP,Ptpn8,70zpep                                       | 1.60E-11 | -9.6494   |
| BI247018  | Ptpmt1,PLIP,1110001D10Rik,2810004N20Rik                       | 0.00098  | -1.79631  |
| NM_023587 | Ptplb,AI255777,AI481689,6330408J20Rik                         | 0.00027  | -2.10157  |
| AB006361  | Ptgds,PGD2,PGDS,21kDa,PGDS2,Ptgs3,L-PGDS                      | 0        | -28.9585  |
| AA214868  | Pten,TEP1,MMAC1,AI463227,2310035O07Rik,A130070J02Rik          | 0.00051  | -1.92872  |
| NM_007676 | Psg16,bCEA,Cea11                                              | 8.36E-06 | -4.70134  |
| AK018116  | Psd2,EFA6C,AW125584,6330404E20Rik                             | 1.20E-13 | -4.24875  |
| NM_011182 | Pscd3,Grp1,AI648983,KIAA4241,mKIAA4241                        | 0.00008  | -1.94006  |
| AB013464  | Pscd1,CLM1,CTH-1,CYTIP,KIAA4240,mKIAA4240                     | 9.29E-26 | -3.55192  |
| BM212050  | Psap,SGP-1,AI037048                                           | 0.0006   | -1.81138  |
| NM_011177 | Prss18,Bssp,Klk6,Klk7,Klk29,Prss9,AI849898,neurosin           | 0.00051  | -2.61728  |
| AA739053  | Prrt1,G5b,NG5,Bat4,Bat-4,ORF31,D17H6S54E                      | 2.45E-12 | -3.2393   |
| AV072100  | Prosc,1700024N20Rik,2200002F22Rik                             | 1.03E-09 | -1.68996  |
| BB427703  | Prosapip1                                                     | 0.00011  | -3.28577  |
| BE630020  | Prnp,PrP,PrPC,Sinc,CD230,PrPSc                                | 2.13E-31 | -4.06283  |
| NM_011160 | Prkg1,CGKI,Prkg1b,Prkgr1b,AW125416                            | 3.51E-18 | -6.044    |
| C80388    | Prkcz,Pkcz,C80388,R74924,zetaPKC,AI098070                     | 0.00004  | -3.97968  |
| AK017901  | Prkce,Pkce,PKC[e],R75156,5830406C15Rik                        | 9.12E-16 | -7.23075  |
| AF251036  | Prkcd,Pkcd,PKC[d],AI385711,PKCdelta,D14ErtD420e               | 0.00057  | -2.59336  |
| NM_011102 | Prkcc,Pkcc,PKCgamma                                           | 0.00002  | -10.48726 |
| BB355213  | Prkca,Pkca                                                    | 3.72E-07 | -3.0244   |
| BB283894  | Prkar1b,Rlbeta,AI385716                                       | 0.00056  | -2.30615  |
| BI687658  | Prkar1a,Tse1,Tse-1,Rlalpha,1300018C22Rik                      | 0        | -1.77814  |
| BB756794  | Prkag2,AAKG,WPWS,AAKG2,H91620p,AI854673,2410051C13Rik         | 5.54E-07 | -3.31157  |
| BQ175911  | Prkaa2,A830082D05,2310008I11Rik                               | 1.81E-06 | -2.61352  |
| BC022643  | Prickle1,Prickle,AW215793,1110058P22Rik                       | 0.00007  | -4.16442  |
| BB005298  | Prepl,MGC7980,mKIAA0436,2810457N15Rik                         | 2.72E-09 | -3.88054  |
| BC008174  | Prdx5,AOPP,PrxV,Pmp20,Prdx6,AOEB166                           | 1.04E-09 | -2.49473  |
| AF326558  | Ppt1,PPT,CLN1,INCL,C77813,AA960502,                           | 2.32E-08 | -2.27549  |
| BF148071  | Ppp3r1,Cnb1,MCIP1                                             | 1.89E-24 | -2.1273   |
| BQ173889  | Ppp3ca,CN,CnA,Caln,Calna,AI841391,                            | 0        | -4.81059  |
| BM247370  | Ppp2r5c,AI060890,AW545884,mKIAA0044,                          | 2.57E-09 | -2.8156   |
| U89924    | Ppp1r3c,PTG,Ppp1r5                                            | 5.62E-08 | -4.5445   |
| NM_025800 | Ppp1r2,IPP-2,D16ErtD248e,                                     | 9.64E-15 | -2.08367  |
| BB375209  | Ppp1r16b,Wdt4,TIMAP,ANKRD4,C130078N17Rik                      | 2.77E-17 | -10.48926 |
| NM_013636 | Ppp1cc,PP1,dis2m1                                             | 3.59E-42 | -2.13665  |
| M27073    | Ppp1cb,1200010B19                                             | 3.62E-06 | -1.52695  |

|           |                                                            |          |           |
|-----------|------------------------------------------------------------|----------|-----------|
| AV290622  | Ppm2c,Gm1024                                               | 7.31E-07 | -2.23969  |
| BB035578  | Ppm1l,PP2C,PP2ce,Ppp2ce,                                   | 3.06E-15 | -3.20268  |
| AK013741  | Ppm1k,MGC115965,2900063A19Rik,A930026L03Rik                | 5.70E-07 | -1.84924  |
| AJ271833  | Ppm1b,PP2CB,MGC106489                                      | 1.97E-08 | -1.54832  |
| AF259672  | Ppm1a,MMPa-2,MPPa-1,                                       | 9.17E-09 | -2.89548  |
| AK003571  | Ppfia4,C81506,AI448359,AI852265,1110008G13Rik              | 2.31E-08 | -6.44924  |
| BM222792  | Ppfia1,LIP1,LIP.1,C87158,liprin,C030014K08Rik              | 0.00008  | -2.87353  |
| BB241408  | Ppargc1b,Perc,4631412G21Rik                                | 0.00058  | -5.1278   |
| BB745167  | Ppargc1a,Pgc1,PGC-1,Pgco1,PGC-1v,                          | 5.34E-38 | -14.40234 |
| AW111876  | Ppap2b,Lpp3,Ppab2b,                                        | 8.57E-29 | -6.21775  |
| AB036749  | Porcn,Ppn,porc,                                            | 9.35E-10 | -4.73816  |
| NM_026398 | Pop5,Rnasep3,AW049989,1500019J17Rik,2700077E03Rik          | 6.71E-20 | -2.37697  |
| C86690    | Pole3,YBL1,1810034K18Rik                                   | 0.00051  | -5.74825  |
| BG094331  | Polb                                                       | 1.34E-06 | -1.94229  |
| NM_134021 | Pnpo,AI415282                                              | 1.34E-06 | -3.96324  |
| BI739353  | Pmm1,C77612                                                | 1.48E-06 | -3.27467  |
| AF378760  | Plxdc1,Tem7,AI848450,2410003I07Rik                         | 0.00002  | -6.73632  |
| NM_032398 | Plvap,PV-1,MECA32                                          | 0.00047  | -3.87164  |
| AI591480  | Pltp                                                       | 0.00013  | -3.58938  |
| BB768495  | Plp1,jp,Plp,msd,rsh,DM20,jimpy                             | 4.82E-26 | -12.21584 |
| AV336001  | Plekhh1,C77772,AV308913,mKIAA1200,D630024D12Rik            | 8.16E-06 | -2.98971  |
| BB478022  | Plekhg3,BC030417,MGC40768                                  | 4.46E-07 | -5.14029  |
| BC002120  | Plekhf1,APPD,PHAFIN1,ZFYVE15,1810013P09Rik                 | 6.48E-15 | -4.29833  |
| AF189817  | Plekhb2,Evt2,Phdc,evt-2,AU018239,2310009M15Rik             | 0        | -5.34601  |
| NM_013746 | Plekhb1,PHR1,evt-1,Phret1,AI315628                         | 7.13E-12 | -3.34172  |
| BB780848  | Plekha3,FAPP1                                              | 3.44E-13 | -1.59901  |
| NM_133942 | Plekha1,TAPP1,AA960558,C920009D07Rik                       | 1.21E-06 | -2.2065   |
| BB293136  | Plcxd3,B130016O10Rik                                       | 5.61E-45 | -4.84689  |
| AV306884  | Plce1,Plce,mKIAA1516,4933403A21Rik                         | 7.17E-16 | -3.52378  |
| BB143801  | Plcb4,AI854601,A930039J07Rik,C230058B11Rik                 | 2.87E-14 | -3.15147  |
| AK005158  | Pla2g7,R75400                                              | 2.15E-18 | -5.66099  |
| AV235932  | Pla2g4e,C230096D22,2310026J01Rik                           | 0.00003  | -2.44469  |
| AV286396  | Pkp4,Armp,p0071,                                           | 2.29E-39 | -3.81987  |
| AV047342  | Pkib,PKIbeta,Prkacn2                                       | 1.10E-13 | -6.58194  |
| AV047342  | Pkib,PKIbeta,Prkacn2                                       | 2.53E-16 | -7.01871  |
| BC017130  | Pja2,AI447901,AL022700,MGC27629,Neurodap1,mKIAA0438        | 4.90E-33 | -2.30521  |
| BM199789  | Pja1                                                       | 1.62E-09 | -2.37993  |
| BB095454  | Pitpnm1,Rd9,RdgB,DRES9,mpt-1,Pitpnm,R75447                 | 1.61E-19 | -6.30858  |
| AA239637  | Pitpna,vb,Pitpn,vibrator                                   | 0        | -3.42588  |
| BB504983  | Pisd,9030221M09Rik                                         | 4.90E-11 | -2.34607  |
| NM_054097 | Pip5k2c                                                    | 4.17E-06 | -2.38453  |
| AK012196  | Pip5k2a,AW742916                                           | 0.00006  | -1.71003  |
| BC019138  | Pip5k1c,AI115456,AI835305,mKIAA0589                        | 0.00005  | -2.81699  |
| NM_008846 | Pip5k1a,STM7,Pip5a,AI844522                                | 1.01E-10 | -3.96577  |
| AV371921  | Pink1,BRPK,AU042772,AW557854,mFLJ00387,1190006F07Rik       | 1.33E-12 | -3.47362  |
| BM207220  | Pik4ca                                                     | 0.00002  | -2.16893  |
| AA414954  | Pik3r3,p55pik,AA414954                                     | 0.00002  | -1.63289  |
| M60651    | Pik3r1,PI3K,AA414921,p50alpha,p55alpha,p85alpha,C530050K14 | 0.0002   | -1.87881  |
| BG969734  | Pigk,3000001O05Rik                                         | 0.00001  | -1.84405  |
| BE952586  | Pib5pa,Pipp                                                | 3.74E-17 | -9.3705   |
| AI267048  | Phyhipl,AI267048,4921522K17Rik                             | 7.69E-10 | -3.74888  |

|           |                                                              |          |           |
|-----------|--------------------------------------------------------------|----------|-----------|
| BB427286  | Phyhip,Lnap1ip,                                              | 5.17E-20 | -27.96848 |
| NM_010726 | Phyh,PAHX,Lnap1,AI256161,AI265699                            | 1.31E-30 | -3.13771  |
| AW107953  | Phr1,Pam,R75243,AU023734,AW107953,AW546647                   | 6.77E-09 | -1.59129  |
| BC024670  | Phlpp,SCOP,Plekhe1,AI836256,mKIAA0606                        | 7.66E-07 | -2.07826  |
| BM233125  | Phkb,AI463271,MGC62514                                       | 0.00043  | -1.92598  |
| NM_008832 | Phka1,Phka,5330411D17,9830108K24Rik                          | 0.00019  | -2.73896  |
| BI663145  | Phf15,Jade2,AI480685,mKIAA0239,1200017K05Rik                 | 0.00002  | -5.07293  |
| BM241699  | Phc3,Edr3,HPH3,E030046K01Rik                                 | 0.00028  | -2.04827  |
| AV339670  | Phactr3,H17739,                                              | 6.52E-09 | -2.68359  |
| BB183423  | Pgm2I1,BM32A,AI553438,4931406N15Rik                          | 3.17E-32 | -2.94908  |
| NM_008828 | Pgk1,Pgk-1,MGC118097                                         | 7.31E-07 | -1.59393  |
| AV151597  | Pgbd5,AI854313,2900019M05Rik                                 | 9.75E-15 | -3.75801  |
| BI407347  | Pgam1,Pgam-1,MGC102422,MGC118049,2310050F24Rik               | 5.46E-07 | -2.43641  |
| NM_019410 | Pfn2,Pfn                                                     | 7.21E-12 | -1.50037  |
| AV343511  | Pfcp,PFK-C,1200015H23Rik,9330125N24Rik                       | 6.25E-11 | -2.55584  |
| NM_021514 | Pfkm,Pfka,PFK-M,AI131669                                     | 2.98E-18 | -4.90485  |
| NM_011070 | Pfdn2,ESTM27,W48336                                          | 1.08E-18 | -1.90443  |
| M13227    | Penk1,ENK,PPA,Penk,AI326464                                  | 1.18E-24 | -17.65743 |
| BM200248  | Peg3,Pw1,End4,Gcap4,Zfp102,AL022617,mKIAA0287                | 2.50E-06 | -1.85349  |
| AI323543  | Pea15,Mat1,PEA-15,Pkcs15                                     | 2.65E-06 | -2.01987  |
| BG063905  | Pdxk,C77999,AA119688,2310036D04Rik                           | 2.96E-26 | -3.32597  |
| NM_013743 | Pdk4,AV005916                                                | 0.00093  | -3.6242   |
| NM_133667 | Pdk2                                                         | 0.00001  | -8.80625  |
| BB699957  | Pdgrf1,AV013190,1110039P19Rik                                | 7.55E-07 | -2.28896  |
| NM_008804 | Pde9a,PDE9A1                                                 | 1.18E-24 | -8.22827  |
| BB303582  | Pde4d,Dpde3,9630011N22Rik                                    | 9.45E-12 | -2.79751  |
| AI448308  | Pde10a                                                       | 1.28E-13 | -4.13087  |
| BB249447  | Pctk1,Crk5,Pctaire1                                          | 2.54E-06 | -2.45765  |
| BI157485  | Pcsk6,SPC4,Pace4,C86343                                      | 0.00035  | -8.39189  |
| NM_008792 | Pcsk2,PC2,Nec2,SPC2,Nec-2,Phpp-2,AI839700,6330411F23Rik      | 0.00021  | -1.62564  |
| AF181560  | Pcsk1n,Pan3,SAAS,proSAAS,AI848336,MGC19107                   | 0.00005  | -10.58125 |
| AV337888  | Pcp4I1,1500036F01Rik                                         | 4.37E-08 | -4.09263  |
| NM_008791 | Pcp4,Pcp-4,P16Rimb19                                         | 0        | -24.05362 |
| NM_008790 | Pcp2,L7,Pcp-2                                                | 0        | -44.3838  |
| BB772192  | Pcnx,Pcnx11,AF096286,AI327143                                | 0.00064  | -2.39312  |
| BM117243  | Pcmt2,AI314201,MGC36470,5330414D10Rik                        | 0.00092  | -1.62105  |
| BB549335  | Pcmt1,MGC117877,8430411F12Rik,A030012M09Rik                  | 5.38E-06 | -2.54184  |
| AV009995  | Pcmt1,PIMT,C79501                                            | 8.32E-10 | -2.58178  |
| NM_011995 | Pclo,Acz,Pico,mKIAA0559                                      | 3.07E-16 | -3.67709  |
| BG073332  | Pcdhgb1,MGC101993                                            | 4.54E-18 | -2.71447  |
| AW146252  | Pcdha4,Cnr1,Cnr1,R75250                                      | 2.14E-06 | -3.14936  |
| BB265776  | Pcdha11,Cnr7,Cnr7,A830022B16Rik                              | 0.00003  | -5.09006  |
| BQ177394  | Pcdh9,Gm297,Gm1213,AU021802,                                 | 2.71E-13 | -4.7088   |
| AY046947  | Pcca,C79630                                                  | 0.00026  | -1.79649  |
| AV094898  | Pcaf,AI461839,AW536563,A930006P13Rik                         | 8.65E-25 | -2.45404  |
| NM_017463 | Pbx2,G17,AU043397                                            | 0.00002  | -2.43954  |
| BI690209  | Parva,Actp,Parvin,AI225929,                                  | 0.00032  | -2.57872  |
| NM_019695 | Pard6a,Par6,Par-6,Par6c,TAX40,Tip-40,PAR6alpha,0710008C04Rik | 5.87E-08 | -2.48367  |
| AI530667  | Paqr8,1700019B16Rik,3110001D06Rik                            | 5.36E-06 | -2.94469  |
| BC022922  | Paqr7,mPR,Mpra,PGLP,AV001994,BB007237,2310021M12Rik          | 4.29E-14 | -3.9546   |
| AK017345  | Pank1,Pank,Pank1a,Pank1b,panK1beta,4632421I06Rik,            | 0.00001  | -1.78136  |



|           |                                                           |          |           |
|-----------|-----------------------------------------------------------|----------|-----------|
| BF456404  | Pak1,Paka,PAK-1,AW045634                                  | 8.41E-45 | -6.26963  |
| BC019726  | Paip1                                                     | 6.51E-06 | -2.19632  |
| BE688382  | Pafah1b1,Lis1,Mdsh,LIS-1,Ms10u,Pafaha,MMS10-U,MGC25297    | 2.35E-17 | -2.0429   |
| BI731319  | Pacsin1,H74,syndapin,mKIAA1379,A830061D09Rik              | 3.35E-10 | -8.06586  |
| AW548944  | Oxr1,C7,C7B,MGC103081,MGC107466,2210416C20Rik             | 2.37E-07 | -2.38572  |
| AU017520  | Ovgp1,OGP,MOGP,muc9,Chit5,120kDa,AU016433,AU019448        | 0.00037  | -1.91561  |
| NM_130880 | Otud7,AJ430384                                            | 0.00001  | -5.03518  |
| BB530087  | Otud1,4933428L19Rik                                       | 2.70E-06 | -2.897    |
| BB826372  | Osbpl9,ORP-9,AU015843,MGC30367,MGC38458,2600011I06Rik     | 4.46E-06 | -2.26675  |
| BB197141  | Osbpl6,ORP-6,AI596402,                                    | 6.52E-27 | -5.75211  |
| NM_020573 | Osbpl1a,Gm753,Osbpl1b,G430090F17Rik                       | 0        | -5.4495   |
| BB383296  | Opcml,Gm181,Obcam,                                        | 6.90E-34 | -2.87778  |
| NM_019409 | Omg                                                       | 1.68E-08 | -8.93763  |
| BE980857  | Olfm3,B230206G02Rik                                       | 1.91E-20 | -8.65776  |
| D78264    | Olfm1,AMY,Noe1,OlfA,AW742568,Pancortin,Pancortin3         | 7.18E-18 | -8.99767  |
| BB542051  | Ogn,OG,OIF,SLRR3A,mimecan,mimican,3110079A16Rik           | 1.35E-08 | -8.6992   |
| AI427540  | Ogfr11,2210417C17Rik                                      | 0.00002  | -2.16732  |
| BC013670  | Ogdh,AA409584,KIAA4192,mKIAA4192,2210403E04Rik            | 0.00046  | -2.62554  |
| BB472509  | Odz3,Odz1,Ten-m3,mKIAA1455,2610100B16Rik                  | 0.00095  | -2.96117  |
| NM_011855 | Odz1,Odz2,TCAP-1,Ten-m1                                   | 0        | -14.89003 |
| BG074373  | Ocr1,OCRL1,BB143339,9530014D17Rik                         | 0.00071  | -3.36391  |
| NM_008756 | Ocln,Ocl                                                  | 7.50E-06 | -2.30301  |
| AV062896  | Ociad2,MGC51598,1810027I20Rik                             | 0.00002  | -2.41525  |
| NM_023429 | Ociad1,OCIA,Asrij,TPA018,                                 | 3.01E-35 | -1.7557   |
| U70674    | Numb,mbn,m-numb                                           | 6.08E-08 | -2.10876  |
| BM120193  | Nudt18,BC036718,MGC38179                                  | 6.35E-06 | -3.08413  |
| NM_008747 | Ntsr2,NT2R,NTRL                                           | 6.67E-14 | -7.10846  |
| BB795585  | Ntrk2,Tkrb,tkB,AI848316,C030027L06Rik                     | 0.00016  | -2.25153  |
| NM_030699 | Ntng1,Lmnt1,AI853992,MGC99878,A930010C08Rik               | 6.14E-11 | -6.22694  |
| AV248094  | Nsg1,p21,m234,Neep21                                      | 7.11E-31 | -3.17316  |
| BB400581  | Nsf,SKD2,AI316878,AU020090,AU067812                       | 4.27E-42 | -6.94987  |
| BG804066  | Nsddr,KIAA0659                                            | 2.78E-07 | -12.17406 |
| BB132137  | Nrxn3,6332407J11,D12Bwg0831e,4933401A11Rik,9330112C09Rik  | 0        | -8.26377  |
| BE949064  | Nrxn2,mKIAA0921,6430591O13Rik                             | 5.67E-07 | -3.1042   |
| BB130571  | Nrxn1,mKIAA0578,1700062G21Rik,9330127H16Rik,A230068P09Rik | 0.00008  | -2.16016  |
| AK003046  | Nrn1,Nrn,cpg15,MGC40786,0710008J23Rik                     | 0.00068  | -1.51924  |
| AK012873  | Nrk,Nesk,AA407323,AA409510,AI225895,AV168563,AW538185     | 3.07E-38 | -9.35695  |
| BB278601  | Nrip3,D7H11orf14,A330103B05Rik,ICRFP703B1614Q5.2          | 1.26E-09 | -3.22803  |
| NM_008735 | Nrip1,RIP140,AA959574,AW456757                            | 6.64E-10 | -2.30646  |
| BC012437  | Nrbp2,BC011468,MGC12117,MGC18994                          | 0.00006  | -2.30578  |
| BE692107  | Nr4a3,CHN,TEC,CSMF,Nor1,MINOR,NOR-1,AI573420              | 5.87E-32 | -20.4285  |
| BE824605  | Nr4a2,NOT,HZF-3,Nurr1,RNR-1,TINOR,TINUR                   | 0.00081  | -2.61721  |
| BQ174990  | Nr3c2,MR,Mlr                                              | 0.00022  | -6.31021  |
| AW556220  | Nr3c1,GR,Grl1,Grl-1                                       | 9.24E-08 | -2.34487  |
| NM_011584 | Nr1d2,RVR,beta,Rev-erb                                    | 6.43E-09 | -8.45034  |
| BI076689  | Nr1d1,R75201,A530070C09Rik                                | 7.94E-13 | -2.67021  |
| NM_023456 | Npy,0710005A05Rik                                         | 7.12E-07 | -3.09183  |
| AV221896  | Nptxr,NPR,Npcd,AI452369,                                  | 2.74E-07 | -3.92546  |
| NM_008730 | Nptx1,Np1,D11Bwg1004e                                     | 3.42E-19 | -5.87938  |
| BC016107  | Npal2,Nipal2,9330161F08Rik                                | 0.00006  | -6.28084  |
| X96585    | Nov,C130088N23Rik                                         | 9.16E-08 | -3.76446  |

|           |                                                       |          |           |
|-----------|-------------------------------------------------------|----------|-----------|
| BB098161  | Nos1ap,Capon,6330408P19Rik                            | 0.00003  | -4.51378  |
| BB794641  | Nos1,NO,bNOS,nNOS,NOS-I,Nos-1                         | 2.57E-07 | -5.67921  |
| AF312394  | Nnp1,NNP-1,AL033305,AL033306,AU018604                 | 0.00044  | -1.68089  |
| BB398185  | Nmnat2,PNAT1,PNAT2,AI843915,MGC113818,D030041I09Rik   | 1.40E-14 | -2.46566  |
| NM_019730 | Nme3,Ndk3,DR-nm23,Nm23-DR,Nm23-M3,AI413736            | 3.31E-07 | -2.98685  |
| AK010285  | Nkiras1,KBRAS1,kappaB-Ras1,2400004O09Rik              | 4.39E-21 | -4.69595  |
| BC010837  | Nipsnap1                                              | 0.00016  | -1.98945  |
| BB326329  | Nipa1,FSP3,Spg6,1110027G09Rik,A830014A18Rik           | 0.00071  | -1.68706  |
| AK009021  | Nifun,Nifu,AA407971,2310020H20Rik                     | 3.91E-11 | -2.19872  |
| AV031928  | Nicn1,1500032A17Rik                                   | 0.00002  | -1.93918  |
| NM_031375 | Ngrn,AW552001                                         | 0.00032  | -2.00516  |
| BE950834  | Neurod2,Ndrf                                          | 1.13E-14 | -4.23935  |
| BM116592  | Neurod1,BETA2,BHF-1,Neurod                            | 0.00073  | -1.94008  |
| BB319030  | Neurl,Nlz,Neu1,Rnf67,AI450910,AI481072,2410129E16Rik  | 3.32E-17 | -6.24609  |
| BE952212  | Nefl,Nfl,NF-L,NF68,CMT2E,AI847934                     | 0        | -40.86641 |
| M35131    | Nefh,Nfh,NF-H,NF200,mKIAA0845                         | 0        | -36.93277 |
| BB258427  | Nef3,Nfm,NF-M,NF160,NF165                             | 2.74E-10 | -5.27472  |
| NM_026267 | Necap1,AI747569,FLJ00061,mFLJ00061,1200016B17Rik      | 2.79E-24 | -2.82033  |
| BM121794  | Nebi,Lnebi,1200007O21Rik,A630080F05Rik                | 1.55E-18 | -4.34488  |
| BE686339  | Neb,AI595938                                          | 1.53E-07 | -2.58894  |
| NM_133666 | Ndufv1                                                | 0.00004  | -1.77937  |
| BC013503  | Ndufs7,1010001M04Rik                                  | 2.39E-08 | -1.83841  |
| NM_134104 | Ndufs5,NADH dehydrogenase Fe-S protein 5 pseudogene   | 4.42E-16 | -1.93749  |
| BM898749  | Ndufs4,C1-18k                                         | 0.00002  | -1.81148  |
| BC027270  | Ndufs3,0610010M09Rik                                  | 7.45E-09 | -1.65929  |
| BC006660  | Ndufs1,MGC7850,MGC19199,5830412M15Rik,9930026A05Rik   | 5.38E-11 | -2.11645  |
| NM_025523 | Ndufc1,KFYI,MGC106656,2310016K22Rik                   | 1.28E-06 | -1.50653  |
| C78790    | Ndufb6,Gm137                                          | 1.28E-08 | -1.56854  |
| NM_025597 | Ndufb3,AI415450,2700033I16Rik                         | 2.93E-09 | -1.65948  |
| BI905689  | Ndufb10,PDSW,22kDa,0610011B04Rik                      | 1.25E-11 | -2.20638  |
| BC012416  | Ndufa8,AW261656,0610033L03Rik                         | 3.59E-18 | -1.79099  |
| NM_025987 | Ndufa6,14kDa,2700038D15Rik,B230217P19Rik              | 0.00019  | -1.63603  |
| AI429575  | Ndufa13,CDA016,CGI-39,Grim19,GRIM-19,AU022060,        | 2.28E-26 | -1.94254  |
| NM_019443 | Ndufa1,MWFE,1810049F12Rik                             | 6.21E-06 | -1.50728  |
| AK014990  | Ndst3,MGC90637,4921531K01Rik,4930511P15Rik            | 1.60E-07 | -3.82179  |
| NM_008681 | Ndr1,Tdd5                                             | 6.58E-11 | -8.07854  |
| AV006122  | Ndr4,Ndr4,R74996,SMAP-8,MGC7067,Ndr1-rs,D8Bwg1337e    | 9.39E-44 | -12.37528 |
| BE631549  | Ndr3,Ndr3,AI747193,4833415O14Rik                      | 9.26E-22 | -6.14726  |
| NM_013864 | Ndr2,Ndr2,SYLD,AI182517,AU040374                      | 1.01E-30 | -6.81683  |
| AI987929  | Ndr1,RTP,DRG1,NMSL,Ndr1,TDD5,CAP43,CMT4D,HMSNL,PROXY1 | 4.71E-06 | -3.54988  |
| NM_010882 | Ndn,Peg6,AI528698                                     | 4.67E-12 | -5.10885  |
| AI647775  | Ndg2,AI267078,1620401E04Rik                           | 7.37E-38 | -13.77847 |
| BC026372  | Ndfip1,N4wbp5,0610010M22Rik                           | 1.50E-27 | -2.15139  |
| AF323918  | Ndel1,NUDEL,MITAP1,2600006O07Rik                      | 2.73E-12 | -1.80131  |
| BE686893  | Ncoa7,9030406N13Rik                                   | 0.00001  | -2.09602  |
| BE996469  | Ncoa1,Src1,Src-1,MGC90703                             | 0.00005  | -2.19574  |
| NM_010878 | Nck1,Nck,6330586M15Rik,D230010O13Rik                  | 3.42E-09 | -3.87382  |
| BC017126  | Ncdn,Ms10ae,norbin,AU042419,MMS10-AE,mKIAA0607        | 0.00005  | -3.68217  |
| NM_010875 | Ncam1,CD56,Ncam,E-NCAM,NCAM-1,NCAM-120,               | 2.24E-14 | -2.20178  |
| BG071381  | Ncald,AI848120,D15Ert412e,D030020D09Rik               | 0.0004   | -2.35533  |
| BI452475  | Narf,4430402O11Rik                                    | 0.00002  | -3.13838  |

|           |                                                        |          |           |
|-----------|--------------------------------------------------------|----------|-----------|
| AK010275  | Napg,SNARE,2400003O04Rik                               | 0        | -2.5983   |
| BB147418  | Napb,I47,E161,Brp14,SNARE,b-SNAP                       | 8.41E-45 | -6.37324  |
| BC004804  | Napa,hyh,RA81,SNAPA,SNARE,a-SNAP,AW209189,             | 0.0002   | -2.56581  |
| NM_021432 | Nap1I5,1110020M21Rik                                   | 0        | -5.74137  |
| NM_138742 | Nap1I3,MB20                                            | 0        | -11.48801 |
| NM_008671 | Nap1I2,Bpx                                             | 0        | -6.74521  |
| NM_008668 | Nab2,AI451907                                          | 0.00006  | -6.71197  |
| NM_008667 | Nab1                                                   | 0.00009  | -2.20841  |
| BM116113  | Myt1I,Nztf1,Pmng1,Png-1                                | 0.00065  | -1.81377  |
| BB429683  | Myrip,Slac2c,Slac2-c,A230081N12Rik                     | 4.87E-07 | -3.06134  |
| BE133806  | Myo6,sv,BC029719                                       | 7.60E-29 | -4.04351  |
| BC003985  | Myo5c,BB085560,C330029I24,9130003O20Rik                | 1.24E-08 | -5.11808  |
| AK010278  | Myh14,II-C,NHMCII,NMHC II-C,2400004E04Rik              | 0.00002  | -4.80164  |
| NM_008653 | Mybpc3                                                 | 0.00015  | -2.95013  |
| NM_008650 | Mut,D230010K02Rik                                      | 3.54E-10 | -2.40996  |
| AK005233  | Mtx2,1500012G02Rik                                     | 2.35E-08 | -3.03569  |
| BB747681  | Mtus1,MD44,Atip1,MTSG1,C85752,ATBP135,AI481402,        | 6.94E-06 | -2.20355  |
| AV094609  | Mtmr7                                                  | 1.84E-07 | -2.82689  |
| BC020019  | Mtmr6,AI428804,AU041072,MGC27983,4022440C11Rik         | 0.00001  | -1.86949  |
| BB381813  | Mtmr1,AW049210,AW548191                                | 0.00051  | -1.6184   |
| AK007757  | Mtch2,HSPC032,2310034D24Rik,4930539J07Rik              | 3.58E-07 | -1.60955  |
| NM_008635 | Mtap7,MAP7,R75000,E-MAP-115                            | 1.17E-29 | -3.83285  |
| BB280360  | Mtap4,Mtap-4,AA407148                                  | 0        | -17.03209 |
| BB765000  | Mtap1a,Map1a,Mtap1,moth1,Mtap-1,AI853608,6330416M19Rik | 1.14E-07 | -4.872    |
| NM_013603 | Mt3,Mt-3                                               | 1.80E-06 | -3.43518  |
| AA796766  | Mt2,Mt-2,MT-II,AA409533                                | 0.00076  | -2.71378  |
| NM_013602 | Mt1,MT-I,Mt-1                                          | 1.69E-25 | -5.15418  |
| BI246587  | Mrps14,Rpms14,AL022847,1810032L21Rik                   | 0.00019  | -1.70037  |
| NM_023331 | Mrpl46,C80107,LIECG2,P2ECSL,C15orf4,3110052F15Rik      | 0.00006  | -1.97543  |
| BB243715  | Mrpl44,AI463302,1810030E18Rik,5730593H20Rik            | 0.00079  | -1.59583  |
| BC019711  | Mrgprf,MrgF,BC019711,MGC18825                          | 0.00026  | -3.17739  |
| NM_033564 | Mpv17I,M-LP                                            | 0.00034  | -2.11739  |
| BI648107  | Mppe1,A530095G11                                       | 0.00008  | -3.33198  |
| BG066186  | Mpp7,Gm955,AI415104,1110068J02Rik,2810038M04Rik        | 0.00001  | -2.29676  |
| AB059357  | Mpp4,DLG6                                              | 6.28E-07 | -5.02107  |
| NM_007863 | Mpp3,Dlgh3,6430514B01                                  | 1.12E-30 | -5.59935  |
| BE197350  | Morf4I1,MRG15,Tex189                                   | 3.65E-26 | -2.03053  |
| U64572    | Mog                                                    | 0.00021  | -5.90763  |
| BC011081  | Mod1,Mdh-1,Mod-1,MGC91072,D9ErtD267e                   | 0.00058  | -8.04628  |
| AI447812  | Mocs2,AI415403                                         | 0.00058  | -2.04101  |
| AI839848  | Mobp,MOBP69,MOBP73,MOBP81                              | 7.30E-12 | -4.28139  |
| BC025064  | Mmd2,C88001,4930518M15Rik                              | 8.05E-07 | -2.89585  |
| BC021914  | Mmd,AA690185,1200017E07Rik,1810073C06Rik               | 3.71E-09 | -1.89182  |
| NM_053015 | Mlph,ln,I1Rk3,Slac-2a,                                 | 0.00053  | -4.03219  |
| NM_019914 | Mllt11,Af1q,Zfp692,AI839562                            | 1.20E-19 | -1.99049  |
| NM_133241 | Mlc1,VL,LVM,MLC,WKL1                                   | 1.59E-11 | -9.50506  |
| BB763517  | Mitf,bw,mi,wh,vit,vitiligo,MGC124309,MGC124310         | 0.00002  | -2.15787  |
| BB022494  | Mirg,Meg9,AI852992,2810474H01Rik                       | 1.25E-13 | -3.23407  |
| BC003902  | Mir16,GDE1,RGS16,1200003M13Rik                         | 3.64E-08 | -2.42948  |
| NM_026524 | Mid1ip1,Mig12,3110038L01Rik                            | 3.77E-11 | -2.37709  |
| AI552688  | Mia3,Tango,A930039G15Rik                               | 1.26E-07 | -1.98986  |

|           |                                                     |          |           |
|-----------|-----------------------------------------------------|----------|-----------|
| NM_025569 | Mgst3,GST-III,AA516734,                             | 0        | -5.22156  |
| AK015544  | Mgat5,GlcNAc-TV,4930471A21Rik,5330407H02Rik         | 0.00028  | -2.33088  |
| BB283751  | Mgat3,GnT-III,Al848272,1110038J12Rik                | 1.30E-06 | -2.61358  |
| NM_133201 | Mfn2,Fzo,D630023P19Rik                              | 3.20E-07 | -3.73826  |
| C79511    | Mfn1,HR2,KIAA4032,mKIAA4032,                        | 2.13E-07 | -2.33358  |
| NM_008594 | Mfge8,P47,Mfgm,SED1,MFG-E8,AA408458,Al325141        | 1.13E-12 | -2.73648  |
| AK017269  | Mfap3l,NYD-sp9,                                     | 0.00002  | -3.84767  |
| BB436326  | Mfap1,4432409M24Rik                                 | 2.80E-09 | -1.53247  |
| BE947704  | Metrn,Hyrac,1810034B16Rik                           | 1.18E-08 | -3.18326  |
| NM_008587 | Mertk,Eyk,Mer,Nyk                                   | 0.00017  | -1.89459  |
| BG070088  | Meis1,Evi8,C530044H18Rik                            | 0.00004  | -5.71955  |
| BB280300  | Mef2c,AV011172,5430401D19Rik,9930028G15Rik          | 1.23E-10 | -2.91481  |
| AV255689  | Mef2a,A430079H05Rik                                 | 3.65E-29 | -3.33517  |
| BB130002  | Mecp2,Mbd5,WBP10,BB130002,1500041B07Rik             | 0.00052  | -1.82705  |
| AK006146  | Me3,MGC107389,1700020C08Rik,B230207H15Rik           | 0.00005  | -3.1144   |
| Al608477  | Mdh1,MDHA,Mor2,MDH-s,Mor-2,D17921,B230377B03Rik     | 7.18E-33 | -2.11807  |
| AK013379  | Mctp1,2810465F10Rik                                 | 1.81E-10 | -5.38426  |
| NM_053177 | Mcoln1,MGC7172,2210015I05Rik                        | 0.00029  | -2.13903  |
| AV293368  | Mcf2l,Dbp, Ost, Ost gamma,mKIAA0362,C130040G20Rik   | 6.68E-09 | -2.49477  |
| BB794635  | Mcc,E330037C19,D18Ert451e,A930012L18Rik             | 1.10E-16 | -5.4464   |
| L07509    | Mbp,mld,shi,Hmbpr,C76307,R75289,golli-mbp           | 4.63E-24 | -13.35164 |
| BB003847  | Mbnl2,MBLL,                                         | 5.13E-10 | -3.15218  |
| NM_020007 | Mbnl1,Mbnl,mKIAA0428                                | 0.00094  | -1.61496  |
| AV298746  | Mbd5                                                | 2.42E-06 | -1.85753  |
| NM_134017 | Mat2b,TGR,MAT-II,                                   | 3.58E-09 | -1.8266   |
| Al642422  | Mast4,Al642422,mKIAA0303,4930420O11Rik              | 0.00009  | -3.4219   |
| BG076407  | Marveld2,MARVD2,Mrvldc2,BC003296,MGC55067           | 2.70E-07 | -5.13257  |
| BQ176049  | March6,mKIAA0597,3830408G03,F830029L24Rik           | 1.67E-11 | -1.83271  |
| AV349132  | March2,MGC7259,9530046H09Rik                        | 0.00005  | -2.37866  |
| M18775    | Mapt,Tau,Mtapt,Al413597,AW045860                    | 0.00009  | -2.53166  |
| U51204    | Mapre3,EB2,Al790651                                 | 2.74E-07 | -7.98804  |
| BC027056  | Mapre2,EB1,EB2,RP1,Al314113,D18Abb1e,C820009F03Rik  | 0.00023  | -1.97901  |
| BC024514  | Mapk9,JNK2,Prkm9,Al851083,p54aSAPK                  | 5.12E-12 | -2.60665  |
| AF178636  | Mapk8ip3,                                           | 0.00018  | -2.78658  |
| BC021640  | Mapk12,Erk6,Sapk3,Prkm12,AW123708,P38gamma          | 1.57E-16 | -11.96824 |
| L35236    | Mapk10,JNK3,Serk2                                   | 6.77E-19 | -3.35748  |
| BF165548  | Map4k3,Glk,MAPKKKK3,RAB8IPL1                        | 0.00015  | -1.58149  |
| AV377656  | Map3k5,ASK1,Mekk5,MAPKKK5,7420452D20Rik             | 4.21E-09 | -3.65008  |
| BM240207  | Map2k4,MEK4,MKK4,Sek1,JNKK1,Serk1,PRKMK4            | 2.93E-10 | -1.81412  |
| NM_008927 | Map2k1,Mek1,MEKK1,MAPKK1,Prkmk1                     | 2.11E-30 | -2.98986  |
| BB549292  | Maob,6330414K01Rik                                  | 0.00008  | -3.65612  |
| BB794673  | Man2a2,MX,Al480988,1700052O22Rik,4931438M07Rik      | 2.05E-08 | -2.50826  |
| BB296321  | Malt1,MGC124469,MGC124470,A630046N12,D430033E09Rik  | 0.00026  | -2.32239  |
| AW012617  | Malat1,Al647968,2210401K01Rik,9430072K23Rik         | 1.06E-07 | -2.28686  |
| NM_010762 | Mal,MPV17,VIP17                                     | 3.07E-42 | -27.59734 |
| NM_053201 | Magee1,DAMAGE,Al847422,mMage-e1                     | 1.79E-10 | -2.56887  |
| NM_010758 | Mag,Gma,MGC123387,siglec-4a                         | 8.01E-08 | -7.78613  |
| AV284857  | Maf                                                 | 6.32E-34 | -4.5044   |
| BM225074  | Madd,IG20,9630059K23Rik                             | 3.57E-06 | -2.07433  |
| BM248206  | Macf1,Acf7,MACF,Acip7,mACF7,ABP620,R74989,mKIAA0465 | 2.51E-10 | -1.89575  |
| BC011116  | M6prbp1,1300012C15Rik                               | 0.00015  | -5.56533  |

|           |                                                       |          |           |
|-----------|-------------------------------------------------------|----------|-----------|
| BC006914  | Lzf,C76152,AU020118,0610011C19Rik                     | 0.00028  | -3.44456  |
| BB463428  | Lyst,bg,beige,D13Sfk13                                | 4.16E-08 | -1.79409  |
| BB667084  | Lysmd3,MGC7041,BC003322,1110030H10Rik                 | 0.00019  | -1.89566  |
| AK008800  | Lysmd2,AV033872,AW538442,2210402C18Rik                | 2.31E-06 | -2.4341   |
| BB431070  | Lynx1,AI838844                                        | 7.32E-08 | -4.57551  |
| NM_011838 | Lynx1,AI838844                                        | 3.83E-10 | -27.16372 |
| NM_010741 | Ly6c,Ly-6C,AA682074,AA959465                          | 0.00003  | -2.72866  |
| BC002070  | Ly6a,TAP,Sca1,Sca-1,Ly-6A.2,Ly-6A/E,Ly-6E.1           | 1.07E-06 | -2.21612  |
| NM_016753 | Lxn                                                   | 0        | -2.53799  |
| BB386209  | Luzp2,D130073E01,9330154K17Rik                        | 0.0002   | -2.65417  |
| BB705823  | Luzp1,Luzp,AI266952,mFLJ00226,2700072H04Rik           | 0.00007  | -3.76379  |
| BB319385  | Lsamp,Lam,Lamp,5430428I19,B130007O04Rik               | 4.71E-07 | -4.79789  |
| BM224801  | Lrrtm3,9630044H04Rik                                  | 6.46E-08 | -3.7144   |
| BB333692  | Lrrtm2,AI851755,BB129880,mKIAA0416,C630011A14Rik      | 0.00008  | -1.95967  |
| AK014938  | Lrrk2,Gm927,cl-46,AW561911                            | 3.07E-10 | -2.79295  |
| NM_008515 | Lrrrip1,Fliiap1,AU024550                              | 3.02E-07 | -4.04046  |
| AV336083  | Lrrc4c,NGL-1,mKIAA1580,6430556C10Rik                  | 0.00011  | -3.69331  |
| BC016574  | Lrrc49,AI430817,AW050057,D430025H09Rik                | 4.70E-11 | -3.05174  |
| BB332932  | Lrrc4,MBAG1,Nag14                                     | 9.75E-13 | -3.60196  |
| NM_138682 | Lrrc4,MBAG1,Nag14                                     | 1.00E-07 | -9.73175  |
| BC019794  | Lrrc3b,LRP15,BC019794,MGC30505                        | 4.28E-22 | -7.41608  |
| BB540721  | Lrrc35,D330014K23,E130107N23Rik                       | 0.00016  | -2.00958  |
| BI101322  | Lrrc19,AI314124,AL022954,AW261791,9130022A01Rik       | 1.09E-06 | -2.212    |
| D00622    | Lrpap1,RAP,HBP44,C77774,AA617339,AI790446,AU042172    | 7.63E-09 | -2.23541  |
| BB750940  | Lrp8,Lr8b,apoER2,4932703M08Rik                        | 1.97E-07 | -3.48387  |
| AV174595  | Lrig1,Img,LIG-1,D6Bwg0781e                            | 0.00001  | -2.62897  |
| BB371739  | Lrnf5,AI427653,AI604817,KIAA4208,mKIAA4208,C130061B21 | 0.00037  | -4.95132  |
| BB011593  | Lrch1,Chdc1,AI552548,AW215503,mKIAA1016,4832412D13Rik | 6.54E-06 | -2.69148  |
| BB297498  | Lpp,C79715,AA959454,AU024130,                         | 1.53E-16 | -2.39914  |
| AK014526  | Lpin1,fl,Kiaa0188,mKIAA0188,4631420P06                | 0.00067  | -1.75964  |
| AV338336  | Lphn3,LEC3,CIRL-3,Gm1379,                             | 8.74E-06 | -2.44468  |
| BE987427  | Lpgat1,AI649174,BC013667,MGC18768                     | 2.54E-13 | -2.30726  |
| AK013739  | Lonrf2,AI851349,2900060P06Rik                         | 0.00007  | -1.98231  |
| BI733057  | LOC545923                                             | 1.14E-06 | -2.74078  |
| BB223743  | LOC545323                                             | 5.04E-07 | -1.97365  |
| AA175473  | LOC545228                                             | 0.00003  | -2.08818  |
| BB229114  | LOC544932                                             | 0.00017  | -12.15324 |
| BB798279  | LOC435684                                             | 0.00042  | -4.8451   |
| BM203642  | LOC434335                                             | 3.57E-14 | -4.34183  |
| BB332375  | LOC434128                                             | 1.26E-06 | -1.91991  |
| BB411302  | LOC433594                                             | 7.27E-07 | -1.56619  |
| BB246383  | LOC433524                                             | 0.00001  | -2.12604  |
| BQ176176  | LOC433022                                             | 0        | -11.76645 |
| BB125223  | LOC432460                                             | 0.00004  | -4.1582   |
| BE852308  | LOC382098                                             | 1.92E-08 | -6.45747  |
| AI837848  | LOC331528                                             | 6.85E-29 | -3.6256   |
| BM235840  | LOC329575                                             | 3.06E-06 | -1.8259   |
| BE995608  | LOC237403                                             | 0.00023  | -7.40045  |
| NM_008084 | LOC14433                                              | 9.87E-14 | -1.8027   |
| NM_080795 | Lnx2,AW209022,9630046H24                              | 0.00021  | -2.58795  |
| BB131619  | Lnx1,Lnx                                              | 0.00018  | -2.03825  |

|           |                                                             |          |           |
|-----------|-------------------------------------------------------------|----------|-----------|
| BE850004  | Lnpep,CAP,IRAP,PLAP_gp160,vp165,2010309L07Rik,4732490P18Rik | 0.00003  | -2.49703  |
| AV370003  | Lmbrd1,AV347960,0910001K20Rik                               | 0.00077  | -1.7236   |
| BG070844  | Lmbr1,AU017641                                              | 2.16E-06 | -1.87087  |
| NM_011698 | Lin7b,Veli2,LIN-7B,MALS-2                                   | 0.0005   | -3.68945  |
| AV287586  | Lin7a,Veli,Veli1,LIN-7A,MALS-1,TIP-33,AI848705,MGC102231    | 0        | -11.00339 |
| AV149705  | Lhfp,AI194968,2810489O06Rik                                 | 1.51E-39 | -4.14766  |
| BI107632  | Lgr4,Gpr48,9130225G07,A930009A08Rik                         | 1.47E-13 | -2.44468  |
| BB187947  | Lgi3,AW049851                                               | 1.29E-06 | -10.35016 |
| BM118120  | Lgi2,mKIAA1916                                              | 1.91E-13 | -5.74218  |
| BB314774  | Lgi1,BB130740                                               | 5.20E-34 | -10.13964 |
| AI987967  | Lgals8,Lgals-8,AI326142,D13ErtD524e,1200015E08Rik           | 4.70E-11 | -2.14908  |
| BC011507  | Lgals7,Galectin-7                                           | 1.61E-13 | -2.74168  |
| BF658789  | Leprotl1,AI854296,1110067H13Rik,1520402O14Rik               | 0.00007  | -1.93116  |
| BM242619  | Lemd3,Man1,AI316861                                         | 2.19E-07 | -1.64523  |
| AW541598  | Ldoc1,Gm366,Mart7                                           | 2.35E-14 | -10.27019 |
| AV216324  | Ldh2,Ldhd,Ldh-2,AI790582                                    | 5.41E-40 | -2.98165  |
| AV273001  | Lbxcor1,Corl1,AV273001,4931440A04,C230094B15Rik             | 4.69E-25 | -17.69098 |
| AK021160  | Lba1,Gm187,A230061D21Rik,C030048J01Rik                      | 5.38E-08 | -2.4599   |
| AV271979  | Lats2,AV277261,AW228608,4932411G09Rik                       | 0.00077  | -2.77404  |
| AW550676  | Lass6,T1L,AW544719,4732462C07Rik                            | 0.00003  | -2.87374  |
| BB377636  | Lasp1,Def-4,SH3P6,AA408629                                  | 0.00042  | -1.63311  |
| NM_026235 | Larp6,AI552438,MGC115805,5430431G03Rik                      | 5.86E-09 | -9.83402  |
| BG261907  | Large,fg,myd,froggy,Gylt1a,mKIAA0609                        | 2.34E-22 | -2.54355  |
| BB560429  | Laptm4b,LAPTM4beta,C330023P13Rik                            | 7.25E-09 | -1.55217  |
| BB811311  | Lancl3,6030463G20Rik                                        | 1.06E-19 | -9.98112  |
| BG970109  | Lamb1-1,C77966,C80098,C81607,Lamb-1,D130003D08Rik           | 0.00023  | -2.4024   |
| U12147    | Lama2,dy,mer,merosin,KIAA4087,mKIAA4087,5830440B04          | 0.00035  | -2.69681  |
| AV023513  | Krtap3-1,KAP3.1,KRTAP3.1,2310003K17Rik                      | 3.88E-13 | -6.94458  |
| U20619    | Kpna1,NP11,Rch2,IPOA5,mSRP1,AW494490                        | 7.63E-06 | -1.71991  |
| AU079968  | Kns2,Klc1,KLC1T,60/70kDa,AI874768                           | 6.47E-06 | -2.07441  |
| BB037068  | Klhl4,B130014A11,C130018J01Rik                              | 1.17E-13 | -6.27611  |
| BQ176961  | Klhdc1                                                      | 5.84E-06 | -5.09598  |
| AV354744  | Klf9,Bteb1,BTEB-1,AA589643                                  | 0.00001  | -2.12859  |
| NM_008451 | Klc2,AW212649,8030455F02Rik                                 | 4.73E-07 | -2.68941  |
| BB815530  | Kitl,Gb,SF,Sl,Clo,Con,Mgf,SCF,SLF,Steel,contrasted          | 7.02E-22 | -2.46865  |
| X65997    | Kit,W,Bs,Fdc,Ssm,CD117,c-KIT,Tr-kit                         | 8.08E-25 | -9.3028   |
| AK005197  | Kirrel3,SST4,NEPH2,mKirre,mKIAA1867,1500010O20Rik,          | 7.25E-08 | -8.28299  |
| NM_010630 | Kifc2                                                       | 0.00022  | -6.4659   |
| D50366    | Kifap3,KAP3,SMAP                                            | 7.00E-15 | -1.81652  |
| BB698320  | Kif5c,KINN,NKHC,NKHC2,NKHC-2,mKIAA0531                      | 1.16E-12 | -2.57684  |
| BI328541  | Kif5b,KHC,AL022807                                          | 8.68E-07 | -2.12809  |
| AU067810  | Kif5a,Kns,Kif5,KIAA4086,mKIAA4086,D10Bwg0738e               | 1.82E-20 | -7.3427   |
| BC016221  | Kif1c,Ltxs1,D11Bwg1349e,B430105J22Rik                       | 0.00007  | -2.2777   |
| BQ175246  | Kif1b,D4Mil1e,AI448212,AI506502,KIF1Bp130,KIF1Bp204         | 0.00006  | -2.10482  |
| NM_008440 | Kif1a,ATSV,Kns1,Gm1626,C630002N23Rik                        | 2.46E-06 | -3.98812  |
| BB352927  | Kctd8,A730087N02Rik                                         | 1.75E-10 | -6.00403  |
| AK009318  | Kctd2,2310012I15Rik                                         | 0.0003   | -1.91151  |
| BM220945  | Kctd12,Pfet1,Pfetin,AU046135,AW538430,6430514H16            | 1.40E-45 | -6.67957  |
| BB333655  | Kcnt1,slo2,Slack,mKIAA1422,C030030G16Rik                    | 9.26E-12 | -7.43423  |
| AB000497  | Kcnq2,KQT2,HNSPC                                            | 2.88E-06 | -5.75184  |
| BB130001  | Kcnn2,SK2,SKCA2                                             | 2.37E-18 | -6.38783  |

|           |                                                          |          |           |
|-----------|----------------------------------------------------------|----------|-----------|
| NM_021452 | Kcnmb4,1700058G18Rik,2900045G12Rik                       | 0.0007   | -2.5816   |
| BE952741  | Kcnma1,Slo,Slo1,mSlo,MaxiK,mSlo1                         | 8.53E-07 | -3.23991  |
| AU043100  | Kcnk1,TWIK-1,AI788889                                    | 3.19E-28 | -4.542    |
| AK007011  | Kcnj9,Girk3,Kir3.3,mbGIRK3,1700085N21Rik                 | 1.15E-06 | -6.04138  |
| BB395066  | Kcnj3,GIRK1,Kcnf3,Kir3.1,MGC124233,MGC124234             | 5.19E-11 | -3.97925  |
| AF322631  | Kcnj10,BIR10,BIRK-1,Kir1.2,Kir4.1                        | 1.36E-14 | -2.88095  |
| BB188374  | Kcnip4,Calp,KChIP4,Calp250,AV032399                      | 0        | -23.53456 |
| NM_027398 | Kcnip1,KCHIP1,AI842357,                                  | 1.48E-12 | -4.14391  |
| NM_010600 | Kcnh1,M-eag,MGC124419,MGC124420                          | 4.14E-10 | -8.40706  |
| AK015001  | Kcng4,KV6.3,KV6.4,AW049024,4921535I01Rik                 | 2.43E-06 | -8.02437  |
| AW045978  | Kcnd3,Kncd3,AW045978                                     | 8.11E-22 | -3.20145  |
| BB472451  | Kcnd2,Kv4.2,R75121,AI839615,AW555701,mKIAA1044           | 0        | -10.64145 |
| NM_145922 | Kcnc4                                                    | 0        | -2.39712  |
| BB130746  | Kcnc1,KV4,NGK2,Shaw,Kv3.1,Kcr2-1,KSHIIIb,C230009H10Rik   | 0        | -28.18564 |
| U31908    | Kcnab2,F5,I2rf5,Kcnb3                                    | 0.00004  | -5.92121  |
| AK015412  | Kcnab1,Akr8a8,Kvbeta1.1,mKv(beta)1                       | 1.47E-25 | -12.10305 |
| BM119753  | Kcna6,Kv1.6,MK1.6                                        | 0.00002  | -6.35838  |
| NM_010595 | Kcna1,MBK1,Mk-1,Shak,Kv1.1,mceph,Kca1-1,AI840627         | 0        | -19.28441 |
| AW049906  | Kbtbd11,mKIAA0711,4930465M17Rik                          | 1.51E-35 | -3.2075   |
| AI842353  | Kazald1,Bono1,AI842353,IGFBP-rP10                        | 0.00061  | -4.62681  |
| BB376821  | Jph4,JP-4,JPHL1,AI425998,9330157P13Rik                   | 3.13E-11 | -3.49399  |
| NM_020605 | Jph3,JP3,JP-3,MGC124338,MGC124339,MGC124340              | 1.57E-13 | -13.24862 |
| BB432934  | Jph1,JP1,JP-1                                            | 2.80E-10 | -2.40736  |
| AV293164  | Jmj1c,TRIP8,Jmj1c,5430433L24Rik,D630035I23Rik            | 7.09E-06 | -1.60716  |
| BQ032637  | Jak1,AA960307,MGC37919,C130039L05Rik                     | 3.72E-12 | -1.70436  |
| NM_010587 | Itns1,Ese1,Itns,EHSH1,                                   | 0.00077  | -5.16794  |
| NM_010585 | Itp1,opt,Ip3r,P400,Pcp1,IP3R1,Pcp-1,D6Pas2,InsP3R,Itp1-1 | 4.90E-44 | -30.35902 |
| BC027291  | Itpka,MGC28924                                           | 4.01E-10 | -10.99096 |
| AW552407  | Itpk1,BC031182                                           | 7.70E-07 | -2.93273  |
| NM_022417 | Itn2c,E25,BRI3,E25C,ITM3,R75508,AU041202,3110038L02Rik   | 3.65E-19 | -2.10877  |
| NM_008410 | Itn2b,E25BMM,D14Sel6,AI256040                            | 0        | -3.8614   |
| NM_008407 | Itn3,Intin3,Itn-3,AW108094                               | 8.33E-06 | -2.72895  |
| BB175009  | Itn1,B930011D01Rik                                       | 1.05E-10 | -3.15896  |
| NM_008403 | Itn1bp1,AI449260,AU019480                                | 5.37E-15 | -2.84284  |
| AU067690  | Iqsec3,AK122446,mKIAA1110                                | 0.00004  | -5.51719  |
| BF164393  | Iqsec1,cl-43,AW561907,BC026481,KIAA0763,mKIAA0763        | 2.00E-15 | -14.68949 |
| AK019361  | Ipw                                                      | 0.00007  | -3.76668  |
| AV257512  | Insig2,Insig-2,2900053111Rik,C730043J18Rik               | 1.14E-06 | -2.51152  |
| BB307136  | Inpp5a                                                   | 0        | -12.33387 |
| BQ176731  | Inpp4b,E130107I17Rik                                     | 1.78E-25 | -11.41933 |
| NM_008384 | Inpp1,AV137389                                           | 7.71E-11 | -6.1314   |
| AV287690  | Inadl,Cipp,Patj                                          | 0        | -8.46643  |
| BC018383  | Ina,NF-66,AV028420,MGC25352                              | 0.0002   | -1.68557  |
| NM_008378 | Impact,E430016J11Rik                                     | 3.55E-17 | -3.36172  |
| AV348702  | Impa1,AI325909,2610002K09Rik,2900059K10Rik               | 2.33E-16 | -2.47694  |
| BI408416  | Ilvbl,AI415009,5830463I21                                | 0.00051  | -7.75089  |
| AJ249492  | Il1fb,IL-TIFb,MGC129416,MGC129417                        | 0        | -20.64657 |
| AK017211  | Il6st,CD130,gp130,AA389424,BB405851,D13Ert699e           | 0.00001  | -1.92511  |
| BC026894  | Il16,KIAA4048,mKIAA4048                                  | 3.55E-13 | -7.0735   |
| BC004619  | Il11ra1,NR1,GP130,Il11ra,AI314697                        | 0.00077  | -2.75237  |
| BB543585  | Igsf4d,NECL3,Igdf4d,9330131D06,A830029E02Rik             | 6.91E-14 | -2.91556  |

|           |                                                           |          |           |
|-----------|-----------------------------------------------------------|----------|-----------|
| AY059393  | Igsf4b,BIgr,Necl1,Tsll1,Necl-1,SynCAM3                    | 3.50E-23 | -6.45541  |
| NM_008344 | Igfbp6,IGFBP-6                                            | 6.92E-07 | -2.8384   |
| BF225802  | Igfbp5,IGFBP-5,AI256729,AW208790                          | 7.81E-11 | -3.46727  |
| BG092290  | Igf2r,CD222,CI-MPR,Mpr300,AI661837,M6P/IGF2R              | 1.93E-09 | -3.572    |
| BM241722  | Ids,AW214631                                              | 3.74E-27 | -2.67757  |
| NM_130884 | ldh3b,C78231                                              | 0        | -2.66979  |
| AK003393  | ldh3a,AA407078,AI316514,1110003P10Rik,1500012E04Rik       | 0.00001  | -1.72381  |
| BB121406  | ld4,ldb4                                                  | 1.36E-37 | -10.97516 |
| NM_010496 | ld2,ldb2,C78922,AI255428                                  | 0.00016  | -2.0675   |
| BF462080  | lcmt,PPMT,STE14,pcCMT                                     | 3.91E-11 | -4.79297  |
| BG064140  | lbrdc3,4930534K13Rik,4930555L03Rik                        | 1.02E-06 | -8.23771  |
| BQ175872  | lars2,C79125,MGC63429,2010002H18Rik                       | 2.70E-13 | -6.00404  |
| NM_019564 | Htra1,L56,HTRA,Prss11,RSPP11,AI429470                     | 1.68E-31 | -29.96139 |
| C77287    | Hspca,hsp4,86kDa,89kDa,Hsp89,Hsp90,Hsp86-1                | 1.94E-28 | -1.89856  |
| BC006722  | Hspa8,70kDa,Hsc70,Hsc71,Hsc73,Hsp73,Hspa10                | 1.53E-30 | -1.63115  |
| BM116299  | Hspa4l,94kDa,APG-1,Osp94,AI461691,MGC117843               | 3.87E-34 | -6.35912  |
| M12573    | Hspa1b,70kDa,Hsp70,hsp68,HSP70A1,Hsp70-1,Hsp70.1          | 0.0008   | -2.42731  |
| BB197697  | Hspa12a,AI840429,AW048913,AW556406,                       | 9.59E-09 | -9.99643  |
| BM200015  | Hsd12,2610207116Rik                                       | 0.00039  | -3.45925  |
| NM_008288 | Hsd11b1                                                   | 2.71E-28 | -9.62117  |
| AW536432  | Hs6st2,6OST2                                              | 1.01E-18 | -3.26234  |
| AV226060  | Hs3st1,3-OST,Hsg3ost,D5Wsu110e                            | 1.93E-18 | -4.43093  |
| AK005016  | Hrsp12,HR12,HRP12                                         | 6.35E-27 | -5.55693  |
| BC024581  | Hras13,C78643,Hrev107                                     | 1.23E-06 | -5.53639  |
| AV153557  | Hpcal4,NVP-2,AI846570                                     | 7.72E-06 | -6.74317  |
| NM_016677 | Hpcal1,Nvp3,NVP-3,Vnsl3,Vsnl3,VILIP3                      | 5.89E-19 | -9.86658  |
| AV240656  | Hook1,azh,A930033L17Rik                                   | 6.49E-18 | -4.41443  |
| BC005773  | Homer3,AW146114                                           | 1.65E-06 | -4.84617  |
| BM124609  | Homer1,SYN47,Ves-1                                        | 0.00044  | -1.66209  |
| AK009007  | Hod,Hop,Ob1,Obl,Hdop,Toto,Cameo,AI848177                  | 2.52E-23 | -5.23128  |
| AF282980  | Hnt,R75390,6230410L23Rik,B230210G24Rik                    | 2.80E-45 | -6.97761  |
| BI080136  | Hnrp12,AI465155,1110031M08Rik                             | 0.00015  | -1.68353  |
| BB827830  | Hnrph3                                                    | 2.39E-06 | -4.27865  |
| AI843818  | Hnrpd,Auf1                                                | 5.62E-06 | -4.03791  |
| NM_080462 | Hnmt,AI788969,1500031F01Rik                               | 0.00036  | -4.91779  |
| NM_010443 | Hmox2,HO-2                                                | 0.0006   | -1.56678  |
| BC025440  | Hmgcl,HL,AW476067                                         | 1.54E-06 | -2.36109  |
| BB744589  | Hlf,E230015K02Rik                                         | 1.97E-10 | -6.37861  |
| AW610715  | Hlcs,D16Jhu34,410I21.SP6                                  | 3.91E-07 | -6.26032  |
| NM_010438 | Hk1,dea,Hk-1,Hk1-s,mHk1-s,BB404130                        | 5.80E-08 | -6.82684  |
| BB309576  | Hivep3,Rc,Krc,KBP1                                        | 0.00049  | -2.22228  |
| NM_030082 | Hist3h2ba,AI413321,1500011O09Rik                          | 0.00021  | -1.6196   |
| BC010564  | Hist2h2aa1,Hist2,H2a-615,AI448581                         | 0.00043  | -1.89119  |
| NM_023422 | Hist1h2bc,H2bfs,R74621,2610022J01Rik                      | 7.86E-07 | -2.6162   |
| BG071019  | Hisppd2a,mKIAA0377,B430315C20Rik                          | 7.50E-11 | -3.77507  |
| BG076079  | Hipk3,PKY,DYRK6,FIST3                                     | 5.64E-16 | -3.60481  |
| AF071070  | Hipk1,Myak,1110062K04Rik                                  | 9.98E-14 | -1.86718  |
| AA590970  | Hip1r,AA410023,mKIAA0655                                  | 0.00003  | -8.8495   |
| NM_025933 | Higd2a,AA690237,2010110M21Rik                             | 1.84E-07 | -1.69553  |
| NM_019814 | Higd1a,Hig1,AI303276,AW049839,2210020B17Rik,7420700H20Rik | 4.00E-15 | -3.57592  |
| BB269715  | Hif1a,MOP1,AA959795,HIF-1alpha                            | 0.0007   | -2.80173  |



|           |                                                              |          |           |
|-----------|--------------------------------------------------------------|----------|-----------|
| BC003914  | Hibadh,AI265272,6430402H10Rik                                | 2.75E-09 | -2.03126  |
| NM_133680 | Hiatl1,AU045608,AW539692,5730414C17Rik                       | 0.00057  | -1.93188  |
| AK017531  | Herc3,AI646603,MGC30404,mKIAA0032,5730409F18Rik              | 0.00028  | -4.07291  |
| BB333568  | Herc2,rjs,jdf2,KIAA0393,                                     | 0.00068  | -2.2787   |
| AW146201  | Herc1,MGC7618,B230218H07,2810449H11Rik,D130015N03Rik         | 1.46E-15 | -1.8589   |
| BB347007  | Hecw1,Ned1,AV273951,9330116H24Rik,E130207I19Rik              | 1.04E-17 | -6.1159   |
| NM_010412 | Hdac5,Hdac4,mHDA1,AI426555,mKIAA0600                         | 0.00005  | -2.7684   |
| BC016208  | Hdac11,MGC27683                                              | 3.05E-13 | -10.06397 |
| NM_010408 | Hcn1,HAC2,Bcng1                                              | 4.26E-42 | -23.2975  |
| BF580567  | Hcfc1r1,HPIP                                                 | 2.04E-08 | -2.27047  |
| AV053864  | Hbxip,XIP,1110003H18Rik                                      | 8.60E-08 | -1.51392  |
| AV209097  | Hbld2,1810010A06Rik                                          | 0.00001  | -2.55888  |
| L07264    | Hbegf,DTS,Dtr,Hegfl,HB-EGF,AW047313,MGC107656                | 0.00014  | -3.06423  |
| BC027434  | Hbb-b2,AI036344                                              | 2.32E-08 | -7.42379  |
| AF071431  | Hbb,beta-globin                                              | 5.29E-07 | -3.33499  |
| NM_008218 | Hba-a1,Hba1                                                  | 2.59E-06 | -10.9052  |
| NM_134248 | Havcr1                                                       | 5.46E-04 | -1.67432  |
| AI451865  | Hars2,0610006H08Rik                                          | 5.09E-20 | -2.10234  |
| BB082407  | Hapln4,Lpr4,Bral2,9330174O11                                 | 2.11E-07 | -8.79127  |
| BE979942  | Hapln2,Bral1,4930401E20Rik                                   | 0.00003  | -3.66153  |
| BI790001  | Haghl,AI844861,MGC101974,                                    | 0.00089  | -2.62736  |
| BI466860  | Hagh,Glo2,Glo-2,Rsp29,BC019817                               | 5.17E-13 | -2.84476  |
| AV150884  | Hadhb,Mtpb,4930479F15Rik                                     | 1.68E-17 | -1.81313  |
| BF460630  | Habp4,4933413D03Rik,4933428J01Rik                            | 0.00019  | -3.98337  |
| AK005204  | H47,H4,H-4,H-47,Sels,C78786,1500011E07Rik                    | 1.05E-08 | -2.10845  |
| BF683028  | Gyk,GK,D930012N15Rik                                         | 1.10E-08 | -2.77917  |
| BC024464  | Gup1,1110011D13Rik                                           | 0.00044  | -2.40268  |
| BF472806  | Gucy1b3,GC-S-beta-1                                          | 1.42E-09 | -2.53909  |
| BE990468  | Gtl2,Meg3,R74756,R75394,                                     | 0        | -58.12579 |
| BC012707  | Gstt2,Yrs,mGSTT2,AI266894                                    | 7.06E-06 | -3.87265  |
| AV003026  | Gsto1,p28,GSTX,AA407097,AI194287,AU018802                    | 2.85E-08 | -2.32864  |
| NM_010358 | Gstm1,Gstb1,Gstb-1                                           | 7.15E-25 | -3.86326  |
| AK002661  | Gstk1,AW260476,0610025I19Rik                                 | 0.00001  | -4.21811  |
| NM_010357 | Gsta4,5.7,GST,mGsta4,GST 5.7                                 | 1.15E-12 | -11.2318  |
| BC026822  | Gsbs,Ppp1r2                                                  | 0        | -20.23626 |
| AV335221  | Grm7,Gpr1g,Gprc1g,                                           | 8.35E-10 | -4.78032  |
| BM941191  | Grm4,Gprc1d,mGluR4                                           | 4.85E-08 | -7.30402  |
| AK002958  | Grm3,Gprc1c,mGluR3,0710001G23Rik                             | 3.33E-29 | -15.57816 |
| AF320126  | Grm1,Gprc1a,mGluR1,MGC90744,4930455H15Rik                    | 0.00021  | -2.34255  |
| AW212189  | Grina,Lag,1110025J15Rik                                      | 4.55E-16 | -6.28063  |
| NM_023168 | Grina,Lag,1110025J15Rik                                      | 1.98E-07 | -6.32415  |
| NM_010350 | Grin2c,NR2C,NMDAR2C                                          | 1.41E-17 | -21.44785 |
| X66118    | Grik1,Glur5,Glur-5,D16lum24,MGC25101,D16lum24e,A830007B11Rik | 0.00004  | -3.14451  |
| NM_008167 | Grid2,Lc,ho,cpr,tpr,                                         | 0        | -17.89316 |
| BB392770  | Gria4,Glur4,Glur-4,gluR-C                                    | 0.00015  | -1.79328  |
| NM_016886 | Gria3,Glur3,Glur-3,KIAA4184,mKIAA4184,2900064I19Rik          | 5.25E-18 | -2.81719  |
| AK014389  | Gria2,Glur2,GluR-B,Glur-2                                    | 9.35E-07 | -1.97324  |
| BQ175316  | Gria1,Glrl,Glrl-1,GlurA,Glur1,HIP1,                          | 0        | -9.53669  |
| NM_080289 | Grhpr,1110059D05Rik,6430629L09Rik                            | 0.00055  | -4.11653  |
| NM_016719 | Grb14,AI505286                                               | 5.63E-10 | -5.90647  |
| AF022072  | Grb10,Meg1,AI325020,mKIAA0207,5730571D09Rik                  | 4.01E-12 | -2.73714  |

|           |                                                            |          |           |
|-----------|------------------------------------------------------------|----------|-----------|
| AV259880  | Gramd3,NS3TP2,AW061306,9030613F08Rik,9130427A09Rik         | 0.00052  | -1.81031  |
| BI729743  | Gramd1b,AI593249,KIAA1201,mKIAA1201,3222402H23             | 1.97E-20 | -2.49691  |
| AK020708  | Gpsn2,SC2,AI173355,D17ErtD178e,2410016D23Rik,A230102P12Rik | 0.00011  | -2.77901  |
| BC019379  | Gprk5,GRK5                                                 | 0.00092  | -2.48844  |
| AK014308  | Gprc5c,MGC6786,MGC11976,1110028106Rik,3200002M13Rik        | 1.53E-07 | -3.45625  |
| BC020004  | Gprc5b,Raig2,AW125761                                      | 7.12E-17 | -9.72617  |
| BC027187  | Gprasp1,GASP,GASP1,MGC100209,2210415K24Rik,3110031O14Rik   | 0        | -2.1484   |
| BB538372  | Gpr68,BB131428                                             | 0.00003  | -6.95829  |
| AB016602  | Gpr3711,CAG-18,D0Kist8,AW047233                            | 6.79E-07 | -2.97998  |
| BQ175510  | Gpr37,Pael-R,AI848630                                      | 2.26E-15 | -11.02083 |
| BB429977  | Gpr22,AW061316,MGC107197,2900068K05Rik                     | 0        | -39.46529 |
| NM_013533 | Gpr162,A-2,Grca,BC031437                                   | 0.00069  | -2.49827  |
| BB762731  | Gpr155,PGR22,DEPDC3,AW319992,1110017O10Rik,F730029F15Rik   | 1.13E-12 | -4.22707  |
| AV221890  | Gpr135,PAFR                                                | 0.00012  | -2.03763  |
| AK016567  | Gpm6b,M6B,Gpm6,AI593561                                    | 1.63E-15 | -2.68681  |
| BB348674  | Gpm6a,M6A,Gpm6,MGC38999                                    | 0        | -4.71873  |
| NM_008156 | Gpld1,AW546131,6330541J12Rik                               | 1.69E-09 | -3.54892  |
| BE992059  | Gpi1,Amf,Org,Gpi-1,Gpi1s,                                  | 1.16E-07 | -1.7829   |
| AA170590  | Gphn,GPH,geph,GPHRYN,                                      | 9.91E-07 | -2.26941  |
| BQ175968  | Gpd2,GPDH,Gdm1,Gpd-m,Gpdh-m,                               | 4.89E-22 | -2.6946   |
| BC019391  | Gpd1,Gdc1,Gdc-1,AI747587,KIAA4010,mKIAA4010                | 1.27E-06 | -5.38593  |
| U82470    | Got2,Got-2,mAspAT,FABP-pm,AL022787,MGC102129,MGC115763     | 0.00019  | -1.96054  |
| AA792094  | Got1,Got-1,cAspAT,AI789014                                 | 0        | -10.4196  |
| NM_018748 | Golga4,Olp-1,AI225887,AU019508                             | 0.00027  | -1.9796   |
| NM_010316 | Gng3,83                                                    | 3.05E-18 | -1.59362  |
| AB030194  | Gng13,AB030194,Ggamma13,1500031D04Rik                      | 0        | -68.37276 |
| NM_025331 | Gng11,0610037B21Rik                                        | 0.00006  | -2.06094  |
| BC016135  | Gnb5,GBS,flr,Gbeta5                                        | 3.40E-39 | -3.9846   |
| NM_010308 | Gnao1,Gnao                                                 | 0.00084  | -2.60968  |
| BQ174580  | Gnai1,Gnai-1,AU046200,Galpha1                              | 0        | -8.27447  |
| NM_025508 | Gmpr,AV028449,2310004P21Rik                                | 7.23E-06 | -2.20382  |
| AW120650  | Gm879                                                      | 1.25E-07 | -4.44515  |
| BQ174072  | Gm691,MGC67359                                             | 0.0004   | -2.15262  |
| BQ176223  | Gm388                                                      | 7.77E-09 | -3.04031  |
| AI391218  | Glul,GS,Glns                                               | 0.0001   | -1.68802  |
| NM_008133 | Glud1,Glud,Gdh-X,GludI,AI118167                            | 5.65E-09 | -2.04282  |
| AI195532  | Gls2,GA,GLS,Lga,AI195532,KIAA4146,mKIAA4146,A330074B06Rik  | 0.00008  | -6.60704  |
| BM239869  | Gls,6330442B14,B230365M23Rik                               | 1.66E-06 | -1.93608  |
| NM_010298 | GlrB,spa,Glyrb,spastic,AI853901                            | 8.82E-18 | -3.96797  |
| BM933153  | Glo1,GLY1,Qglo,                                            | 0.00004  | -3.47742  |
| BB795216  | Glg1,CFR,CFR-1,ESL-1,MG160,Selel,MG-160,AI593353,AW537898  | 0.00015  | -2.39484  |
| BC016507  | Gjb6,Cx30,AA958971,D14Bwg0506e                             | 0        | -8.25562  |
| BI737842  | Gja9,cx36,connexin36                                       | 0.00011  | -3.53489  |
| M63801    | Gja1,                                                      | 1.71E-18 | -11.98338 |
| BC010224  | Ghitm,C77840,PTD010,1010001P14Rik                          | 3.86E-15 | -5.01434  |
| AW538065  | Ggps1,C79210,AI843169,1810026C22Rik,9530089B04Rik          | 1.10E-08 | -2.59554  |
| BB501734  | Gga3,mKIAA0154,C230037M19Rik                               | 0.00089  | -1.50755  |
| BC024955  | Gdpd5,BC024955,MGC31332,MGC37148                           | 0.00074  | -2.43776  |
| BC013758  | Gdi1,GDIA,GDIalpha,MGC21593                                | 6.91E-08 | -2.07296  |
| L42114    | Gdf10                                                      | 5.37E-14 | -14.67144 |
| BC025070  | Gdap2,C77050,D3ErtD801e                                    | 0.00003  | -1.7138   |

|           |                                                              |          |           |
|-----------|--------------------------------------------------------------|----------|-----------|
| AK017462  | Gcnt1,IGnT,B130048E03,C2 GlcNAcT,5630400D21Rik               | 0.00018  | -3.44942  |
| NM_008129 | Gclm,Gclcr                                                   | 0.00012  | -2.20224  |
| NM_008095 | Gbas,AV006093,Nipsnap2                                       | 8.29E-12 | -2.09964  |
| AW108522  | Gatm,AT,AI314789,1810003P21Rik                               | 9.36E-06 | -1.99381  |
| NM_008088 | Gas7,Gas7-cb,AW124766                                        | 2.90E-11 | -11.08361 |
| NM_019521 | Gas6,Gas-6                                                   | 2.01E-07 | -1.92291  |
| AU067654  | Garnl4,Gm1561,AU067654,MGC130388,mKIAA1039,RP23-20M18.15     | 1.28E-17 | -5.9138   |
| BB131106  | Garnl3,AW120551                                              | 1.61E-19 | -12.5447  |
| NM_016658 | Galt,AW553376                                                | 1.20E-06 | -3.03645  |
| BB048942  | Galnt9,GalNAc-T9,6430598F23                                  | 3.07E-07 | -7.66268  |
| AF349573  | Galnt7,AI225872                                              | 4.64E-17 | -4.36643  |
| BE995677  | Galnt13,BB182356,A230002A12,A230020F20                       | 7.22E-21 | -12.99738 |
| NM_144731 | Galnf7                                                       | 1.23E-04 | -1.54893  |
| AF326550  | Gad2,GAD65,Gad-2                                             | 9.32E-06 | -1.8681   |
| AF326547  | Gad1,EP10,GAD67,Gad-1                                        | 1.93E-43 | -60.20954 |
| AV348821  | Gabrg2,gamma2,GABAA-R,Gabrg-2,AI851231,BB128510              | 7.23E-21 | -10.0367  |
| AF156490  | Gabrg1,GabaA,GabaA/BZ,MGC107399                              | 3.08E-09 | -3.38692  |
| NM_008072 | Gabrd,AI853201                                               | 0        | -18.78674 |
| BQ175666  | Gabrb3,Cp1,Gabrb-3,AW049585,A230092K12Rik                    | 0.00021  | -2.09584  |
| NM_008070 | Gabrb2,GABA-A,Gabrab2,Gabrb-2                                | 9.80E-11 | -2.81857  |
| NM_008069 | Gabrb1,Gabrb-1,AW061132                                      | 5.07E-28 | -11.27484 |
| AF256198  | Gabra6,alpha6,Gabra-6                                        | 0        | -100      |
| BB430205  | Gabra4,Gabra-4                                               | 0.00002  | -2.26579  |
| BB339336  | Gabra2,Gabra-2,C630048P16Rik                                 | 2.29E-18 | -7.99631  |
| Z36357    | Gabra1,Gabra-1                                               | 0        | -23.99959 |
| NM_019439 | Gabbr1,GABAbR1,bM573K1.1                                     | 3.57E-08 | -4.65398  |
| BF160931  | Gabarapl2,Gef2,GATE-16,                                      | 6.97E-18 | -2.47484  |
| AF180518  | Gabarapl1,GECl,App8l,                                        | 2.37E-16 | -2.75378  |
| BB316060  | Gababrbp,Marlin-1,5830437M04Rik,C330021K24Rik                | 9.58E-25 | -6.69866  |
| BG072335  | G630014P10Rik                                                | 0.00003  | -2.73187  |
| NM_008059 | G0s2,AI255151,AV006465                                       | 0.00089  | -3.34474  |
| AJ428065  | Fyco1,Mem2,RUFY3,ZFYVE7,2810409M01Rik                        | 4.23E-06 | -4.5637   |
| NM_019503 | Fxyd1,PLM,PML,0610012C17Rik,1110006M24Rik                    | 6.63E-09 | -8.40338  |
| AV256803  | Fxr1h,Fxr1,Fxr1p,1110050J02Rik,9530073J07Rik                 | 0.00001  | -2.57411  |
| BB484070  | Fut9,mFUT9,AI746471,AU067636,mFuc-TIX                        | 1.17E-11 | -2.05621  |
| AI510221  | Fundc2,DC44,HCBP6,4833415N24Rik                              | 0.00053  | -2.02687  |
| BB207587  | Fuk,AI303278,1110046B12Rik                                   | 0.00051  | -2.4108   |
| NM_010239 | Fth1,FHC,Fth,MFH,AL022624,AL033366                           | 1.53E-08 | -2.1666   |
| BB374771  | Fstl5,9130207J01Rik                                          | 9.99E-12 | -3.73589  |
| BB472173  | Frmf6,AW212977,2610019M19Rik,4930488L10Rik                   | 0.00015  | -2.51179  |
| NM_020009 | Frap1,FRAP,flat,mTOR,FRAP2,RAFT1,RAPT1,AI327068,             | 1.17E-07 | -1.82931  |
| BB364488  | Foxo3a,Fkhr2,Foxo3,C76856,FKHRL1,1110048B16Rik,2010203A17Rik | 3.97E-06 | -2.27008  |
| AV026617  | Fos,c-fos,D12Rfj1                                            | 3.81E-10 | -8.72126  |
| NM_016770 | Folh1,mopsm                                                  | 0.00023  | -3.60701  |
| AK005096  | Fndc5,PeP,Pxp,AI836596,MGC129464,MGC129465,1500001L03Rik     | 0.00032  | -8.30634  |
| BG071234  | Fnbp1,FBP1,Fbp17,1110057E06Rik,2210010H06Rik                 | 0.00008  | -3.43584  |
| NM_022014 | Fn3k,2310074G21Rik                                           | 4.88E-07 | -5.98129  |
| BB532202  | Fmod,SLRR2E,AI131919,AU041740                                | 3.42E-08 | -14.07718 |
| BM228488  | Fmn2,AU024104                                                | 0.00062  | -1.68183  |
| BB477613  | Flywch1,mKIAA1552,E030034P13Rik                              | 8.29E-10 | -3.83451  |
| NM_010229 | Flt3,Ly72,CD135,Flk-2,Flt-3,MGC124377,MGC124378,B230315G04   | 0.0006   | -3.70296  |

|           |                                                         |          |           |
|-----------|---------------------------------------------------------|----------|-----------|
| NM_010228 | Flt1,Flt-1,sFlt1,VEGFR1,VEGFR-1,AI323757                | 0.00082  | -2.97485  |
| BB039519  | Flrt1                                                   | 3.39E-07 | -3.66143  |
| BM206272  | Flnb,AL024016                                           | 1.84E-36 | -2.85345  |
| AV269574  | Flcn,Bhd,FLCL,AU014660,MGC37841,B430214A04Rik           | 4.06E-06 | -2.57624  |
| NM_008020 | Fkbp2,13kDa,mFKBP2,mFKBP13                              | 2.06E-12 | -2.07107  |
| BB732903  | Fgfr3,HBGFR,Fgfr-3                                      | 1.29E-15 | -6.08925  |
| BG873440  | Fgfr2,Bek,Fgfr7,Fgfr-2,Fgfr-7,KGFRTr                    | 2.04E-07 | -2.19064  |
| NM_008008 | Fgf7,Kgf                                                | 1.30E-21 | -3.60713  |
| AV141013  | Fgf14,Fhf4,FHF-4,MGC129318,MGC129319,mFHF-4(1B)         | 5.38E-17 | -7.51421  |
| BQ175704  | Fgf12,Fhf1,AV114868                                     | 3.42E-19 | -6.18369  |
| AI649186  | Fgf1,Fam,Fgfa,Dffrx,Fgf-1                               | 1.14E-07 | -4.66179  |
| BM206792  | Fez2,9030616F16,D17ErtD315e                             | 1.55E-07 | -2.4087   |
| AU067669  | Fez1,UNC76,UNC-76,MGC19293                              | 1.12E-08 | -1.88599  |
| AV338062  | Fbxw7,AGO,Cdc4,                                         | 0        | -4.37388  |
| BB315985  | Fbxw11,HOS,BTRC2,BTRCP2,                                | 0.00009  | -1.65999  |
| NM_023605 | Fbxo9,AA986398,9030401P18Rik                            | 2.41E-12 | -2.65766  |
| BB126849  | Fbxo41,9630017H13,D6ErtD538e                            | 1.23E-06 | -4.68353  |
| BM939903  | Fbxo33,AI642135,5730501N20Rik                           | 8.09E-08 | -2.51367  |
| BG867006  | Fbxo3,Fba,AI046358,1200002G09Rik,1700026K02Rik          | 2.81E-16 | -1.8904   |
| BB003473  | Fbxo28,Fbx28,                                           | 0.00008  | -2.07431  |
| BB311718  | Fbxo2,FBG1,FBX2,Fbs1,Fbs2,NFB42,MGC54895                | 3.80E-07 | -4.66162  |
| BQ173911  | Fbxl5,Fbl4,Fir4                                         | 0.00047  | -1.71699  |
| BM232403  | Fbxl16,BC042620                                         | 2.12E-07 | -2.04329  |
| AW048300  | Fath2,Fat2,Gm523,mKIAA0811                              | 1.57E-26 | -11.10876 |
| AV088463  | Fath,Fat1,mFat1,AU023433,2310038E12Rik                  | 3.38E-06 | -1.91719  |
| AK013476  | Faim2,Lfg,NMP25,AI854036,mKIAA0950,2900002L20Rik        | 2.01E-06 | -6.81511  |
| NM_010176 | Fah                                                     | 2.73E-06 | -3.37625  |
| BE996238  | Fads6,BC044804                                          | 1.09E-17 | -10.14538 |
| BM235658  | Fads3,AI464531                                          | 0.00008  | -2.69451  |
| BC026831  | Fads1,DSD,AI317215,MGC37858,0710001O03Rik,A930006B21Rik | 1.80E-07 | -2.13795  |
| NM_010174 | Fabp3,Mdgi,Fabph1,Fabph4,H-FABP,Fabph-1,Fabph-4         | 2.76E-14 | -7.08162  |
| BC024886  | F3,TF,Cf3,Cf-3,CD142,AA409063                           | 7.87E-06 | -5.3933   |
| NM_007970 | Ezh1,AW557915,mKIAA0388                                 | 1.86E-09 | -2.41405  |
| BM203810  | Extl2,AW146439,3000001D04Rik                            | 1.74E-21 | -3.9988   |
| BQ176550  | Exph5,Slac2b,slac2-b,                                   | 3.93E-29 | -12.0595  |
| BF457860  | Exoc3,Sec6,Sec6l1,E430013E20Rik                         | 8.74E-06 | -1.93012  |
| NM_010161 | Evi2a,Evi2,Evi-2,AW491894                               | 1.17E-10 | -3.21443  |
| BI456953  | Etv3,Pe1,METS,AI414410                                  | 0.00016  | -1.95007  |
| NM_007960 | Etv1,ER81,Etsrp81                                       | 2.86E-43 | -3.81197  |
| BC005486  | Ets2,Ets-2,AU022856                                     | 0.00017  | -1.62569  |
| BG066916  | Etnk1,EKI1,C80956,                                      | 0.00004  | -1.66291  |
| BM120846  | Esrrg,ERR3,Errg,NR3B3,mKIAA0832                         | 0        | -24.60435 |
| AI788755  | Errfi1,Mig6,AI788755,1300002F13Rik                      | 2.35E-09 | -3.85118  |
| BM234652  | Ero1l                                                   | 0.00023  | -1.5765   |
| NM_133191 | Eps8l2,Eps8r2,AI042819,AW545405                         | 0.00023  | -1.74329  |
| NM_007945 | Eps8,AW261790                                           | 3.01E-18 | -4.82941  |
| BG067649  | Eps15,2410112D09Rik                                     | 0.00012  | -2.2906   |
| AF057286  | Epn2,lbp2,AA536924,9530051D10Rik                        | 2.24E-08 | -2.33494  |
| NM_010145 | Ephx1,Eph1,Eph-1,AI195553                               | 0.0001   | -2.68699  |
| BB075797  | Epha7,Ebk,Ehk3,Mdk1,Cek11,Hek11                         | 0.00021  | -3.58208  |
| AF353717  | Epdr2,Ucc1,Epdm2,Epdr1,                                 | 0.00005  | -5.52997  |

|           |                                                              |          |           |
|-----------|--------------------------------------------------------------|----------|-----------|
| NM_013514 | Epb4.9,dematin,AI325486                                      | 7.46E-10 | -4.22867  |
| BB462549  | Epb4.1,4.1R,Elp1,Elp-1,AI415518,KIAA4056,mKIAA4056,D4Ert442e | 7.06E-29 | -7.60419  |
| BB128925  | Eomes,Tbr2,C77258                                            | 4.13E-18 | -4.40044  |
| AB031037  | Eomes,Tbr2,C77258                                            | 5.11E-07 | -6.12475  |
| BC011294  | Enpp5,D17Abb1e,KIAA4152,mKIAA4152                            | 1.24E-39 | -8.48625  |
| NM_013509 | Eno2,NSE,Eno-2,AI837106,D6Ert4375e                           | 1.95E-30 | -28.81452 |
| NM_007931 | Endog                                                        | 0.00055  | -3.10253  |
| NM_010134 | En2,En-2,BB131122                                            | 2.93E-10 | -2.52944  |
| BE571790  | Emp2,XMP                                                     | 0.00015  | -4.04437  |
| BB650819  | Eml5,BC027154,C130068M19Rik                                  | 8.95E-10 | -2.88963  |
| BG064842  | Emb,Gp70,AL022799,MGC21425                                   | 0.00045  | -3.15991  |
| BC005602  | Elovl7,AI840082,9130013K24Rik                                | 5.49E-08 | -2.66624  |
| BI738305  | Elmod1,4831417L10                                            | 9.93E-29 | -15.00319 |
| BB123652  | Elmo2,CED-12,mKIAA1834,1190002F24Rik                         | 2.29E-07 | -4.31092  |
| BC024727  | Elmo1,CED-12,AI173001,KIAA0281,                              | 0.00073  | -2.44985  |
| AW046689  | Elk4,Sap1,BB162516,2310011G17Rik,A130026I01Rik               | 4.52E-06 | -2.66671  |
| BM243464  | Elk3,Erp,Net,Etrp,Sap-2,D430049E23Rik                        | 4.17E-09 | -1.67042  |
| BM240314  | Elf4a2,Elf4,Ddx2b,BM-010,4833432N07Rik                       | 0        | -5.05683  |
| AK002778  | Elf3s5,AA409853,MGC90606,0610037M02Rik                       | 1.19E-40 | -2.89053  |
| AI987871  | Elf2c1,Ago1                                                  | 0.00077  | -1.98905  |
| AV328340  | Elf2ak2,Prk,Tik,Prkr,AI467567                                | 0.00025  | -2.37432  |
| BB471576  | Elf1ay,AI426898,1500010B24Rik                                | 8.81E-08 | -2.1546   |
| BM234719  | Ehd3,Ehd2                                                    | 4.04E-10 | -4.6369   |
| NM_020596 | Egr4,NGFIC,NGF1-C,NGFI-C,pAT133                              | 0.00071  | -2.61174  |
| NM_007913 | Egr1,egr,TIS8,Zenk,Egr-1,NGFIA                               | 4.88E-11 | -2.87842  |
| U30244    | Efnb2,Epl5,ELF-2,Eplg5,Htk-L,Lerk5,LERK-5,NLERK-1            | 0.00047  | -4.64228  |
| NM_007906 | Eef1a2,S1,wst,Eef1a,wasted                                   | 3.69E-08 | -5.40499  |
| BE956288  | Eef1a2,S1,wst,Eef1a,wasted                                   | 6.54E-12 | -9.36362  |
| AW556344  | Eea1,ZFYVE2,A430109M19Rik,B230358H09Rik                      | 0.00038  | -2.65985  |
| BB770914  | Ednrb,s,ETb,ET-B,ET>B<,Sox10m1,AU022549                      | 0.00063  | -2.03571  |
| U70622    | Edg2,Kdt2,lpA1,vzg-1,Gpccr26,AI326300,MGC29102,5031439C20    | 5.05E-09 | -6.50741  |
| BB133079  | Edg1,lpB1,S1P1,lpB1,AI849002                                 | 3.63E-12 | -9.90211  |
| AB030185  | Edf1,AA409425,0610008L11Rik                                  | 0.00015  | -1.63825  |
| AK013765  | Ecgf1,PDECGF,Pdgfec,PD-ECGF,2900072D10Rik,4930423K06Rik      | 9.67E-09 | -3.50028  |
| AV299725  | E130115E03Rik                                                | 1.00E-15 | -5.53485  |
| BI731047  | E130013N09Rik,AI854265,AL022637,AW319638                     | 0        | -62.78236 |
| BG066858  | E030041M21Rik,C80672,                                        | 3.99E-06 | -1.67885  |
| AW060797  | E030025D05Rik,RP23-398G11.2                                  | 0.00004  | -2.2403   |
| NM_025975 | Dynlt3,Tcte1l,AU042796,2310075M16Rik                         | 5.89E-08 | -4.46675  |
| NM_010063 | Dync1i1,DIC,IC74,Dncic1                                      | 0        | -16.56641 |
| BB153808  | Dvl1,Dvl,KIAA4029,mKIAA4029                                  | 0.00008  | -1.78226  |
| AV287497  | Dusp3,VHR,T-DSP11,2210015O03Rik,5031436O03Rik                | 5.56E-28 | -3.40255  |
| AF357887  | Dusp15,T-DSP10,LMW-DSP10                                     | 0.00015  | -2.34844  |
| NM_022019 | Dusp10,MKP-5,AI158871,2610306G15Rik                          | 2.12E-07 | -3.29471  |
| NM_013642 | Dusp1,erp,mkp-1,3CH134,Ptpn16,U19515                         | 6.08E-10 | -3.35077  |
| X95226    | Dtna,A0,Dtn,adbn,a-DB-1                                      | 9.62E-35 | -8.27395  |
| BG075865  | Dscr1l2,AU041093                                             | 1.85E-06 | -2.23965  |
| NM_030598 | Dscr1l1,MCIP2,ZAKI-4                                         | 2.80E-45 | -15.07141 |
| AK003400  | Drd1ip,Calcyon,0710001P07Rik,1110004A22Rik                   | 4.77E-08 | -3.61984  |
| AV328546  | Dpp6,Rw,Dpp-6,Peplb,D5Buc3,D5Buc4,D5Buc5,ln(5)6H-p           | 3.93E-07 | -3.46795  |
| BQ176414  | Dpp10,DPRP3,6430601K09Rik                                    | 0        | -17.24611 |

|           |                                                        |          |           |
|-----------|--------------------------------------------------------|----------|-----------|
| BI249075  | Dp1,Reep5,R74856,DP1/TB2,TB2/DP1,AI324241,AU022809     | 6.27E-28 | -4.37544  |
| BB357126  | Dos,R29144/1,MGC118572,9630008F14                      | 0.00005  | -6.10914  |
| BB389014  | Dock9,AA959601,AW538057,Zizimin1,D14Wsu89e             | 1.06E-24 | -18.45601 |
| AK018140  | Dock3,PBP,MOCA,mKIAA0299                               | 0.00001  | -1.97589  |
| BM117900  | Doc2b                                                  | 1.97E-13 | -12.68054 |
| BB130476  | Dnm3,AW061159,mKIAA0820,C530045C17                     | 0        | -18.45211 |
| BM249101  | Dnm1l,Drp1,AI450666,MGC90593,6330417M19Rik             | 7.88E-07 | -1.93234  |
| AF370126  | Dner,BET,Bret,MGC39059,A930026D19Rik                   | 3.70E-31 | -4.79033  |
| BB020972  | Dnajc6,mKIAA0473,2810027M23Rik                         | 6.88E-09 | -4.84956  |
| BI685030  | Dnajc5,Csp,AU018536,2610314I24Rik                      | 0.00054  | -3.19337  |
| BC024335  | Dnajc19,Tim14,AA959924,1810055D05Rik                   | 0.00041  | -1.96367  |
| NM_025384 | Dnajc15,Dnajd1,1110003P16Rik                           | 6.65E-09 | -1.98464  |
| NM_013888 | Dnajc12,Jdp1,mJDP1                                     | 1.91E-08 | -2.69148  |
| NM_013760 | Dnajb9,Mdg1,mDj7,ERdj4,AA408011,AA673251               | 4.03E-14 | -2.49488  |
| AK006478  | Dnajb4,1700029A20Rik,2010306G19Rik,5730460G06Rik       | 0.00008  | -5.49515  |
| BE952491  | Dnajb14,5730496F10Rik                                  | 4.70E-19 | -2.37335  |
| NM_020266 | Dnajb10,Hsj1,mDj8,MGC113758,2700059H22Rik              | 3.28E-08 | -8.84423  |
| BQ176119  | Dnaja4,Dj4,Hsj4,AV358213,1110021L12Rik                 | 3.73E-06 | -5.14256  |
| AK004575  | Dnaja3,Tid-1,Tid1l,C81173,1200003J13Rik,1810053A11Rik  | 1.25E-06 | -2.4388   |
| BB283300  | Dnaja1,Hsj2,Nedd7                                      | 0.00004  | -4.38912  |
| AK018275  | Dmxl2,mKIAA0856,6330586A12,6430411K14Rik,E130119P06Rik | 5.35E-14 | -1.6792   |
| AV020965  | Dmp1,PP,Dmp,AV020965                                   | 7.71E-08 | -4.78419  |
| NM_007868 | Dmd,mdx,pke,Dp427,DXSmh7,DXSmh9                        | 0.00006  | -2.3024   |
| BB263909  | Dlgh2,PSD93,Gm1197,A330103J02Rik,B330007M19Rik         | 8.94E-06 | -2.37873  |
| BQ176806  | Dlgh1,SAP97,KIAA4187,mKIAA4187,B130052P05Rik           | 3.08E-42 | -3.96855  |
| AK016873  | Dlgap1,Gkap,Sapap1,AI845682,                           | 7.43E-06 | -3.15992  |
| BB812902  | Dleu2,Alt1,Leu2,AI197277,                              | 2.85E-08 | -5.70621  |
| AI647805  | Dld,AI315664,AI746344                                  | 0.00092  | -1.69281  |
| BB768194  | Dlc1,HP,Arhgap7,STARD12                                | 5.90E-10 | -8.38889  |
| AV336908  | Dlat,DLTA,PDC-E2,6332404G05Rik                         | 1.39E-09 | -2.51278  |
| BB758432  | Dixdc1,Ccd1,Ccd1CL,                                    | 0.00027  | -1.71992  |
| BB023743  | Disp2,DispB,AI840597,mKIAA1742,B230210L08Rik           | 7.31E-14 | -3.82597  |
| BM114282  | Diras2,AI414999,2900052J15Rik                          | 0        | -10.4412  |
| BB361907  | Diras1,RIG,Gbts1,Di-Ras1                               | 4.61E-10 | -12.5324  |
| BC002232  | Dip3b                                                  | 0        | -3.30245  |
| BB794700  | Dip2,AI426328,mKIAA0184,Kiaa0184-hp,4931420H10Rik      | 3.43E-16 | -1.84541  |
| AF177196  | Dio2,AI324267                                          | 4.17E-13 | -4.2279   |
| BC014860  | Dgkz,mDGK[z],E130307B02Rik                             | 1.55E-07 | -2.82077  |
| BB655998  | Dgkh,D130015C16,5930402B05Rik                          | 5.96E-09 | -3.28778  |
| AI646503  | Dgkg,90kDa,Dagk3,AI854428,KIAA4131                     | 4.20E-45 | -19.1191  |
| AV274554  | Dgke,DGK,DAGK6,C87606                                  | 0.00013  | -2.44154  |
| BB094429  | Dgkd,dgkd-2,AI841987,DGKdelta,KIAA0145,D330025K09      | 3.65E-14 | -1.88995  |
| AK010883  | Dfy,FY,GPD,Darc,CCBP1,CD234,ESTM35,AA162249            | 2.41E-07 | -2.46747  |
| NM_021428 | Dexi,Myle,AI836170,AW413143,D16Bwg0586e,1810029J14Rik  | 1.54E-06 | -2.15916  |
| BB417749  | Derl1,AI195141,AW551338,Derlin-1,1110021N07Rik         | 0.00005  | -1.59559  |
| AV286991  | Degs1,Degs,Des1,Mdes,AA536663                          | 1.37E-09 | -3.41938  |
| BE952632  | Decr2                                                  | 0.00022  | -3.73932  |
| BC009142  | Ddx5,p68,Hlr1,G17P1,HUMP68,MGC118083,2600009A06Rik     | 2.11E-16 | -1.93386  |
| U46690    | Ddx24,AI649272,1700055J08Rik,2510027P10Rik             | 2.31E-11 | -3.24356  |
| NM_010027 | Ddt,C78655                                             | 8.48E-20 | -3.01469  |
| AY027937  | Ddb2,MGC117576,2610043A19Rik                           | 3.88E-06 | -3.10739  |

|           |                                                         |          |           |
|-----------|---------------------------------------------------------|----------|-----------|
| AW556888  | Ddah1,AI987801,AW050362,2410006N07Rik,2510015N06Rik     | 0.00012  | -1.99063  |
| BQ174703  | Dcamk1,DCLK,Cpg16,mKIAA0369,1700113D08Rik,2810480F11Rik | 2.08E-18 | -4.92041  |
| BC018323  | Dbp                                                     | 1.96E-06 | -3.84328  |
| NM_007830 | Dbi,Acbp,ACBD1                                          | 8.30E-14 | -2.43249  |
| AB060589  | Dbccr1,BRINP,Brinp1                                     | 1.67E-28 | -7.4469   |
| BC018377  | Dao1,DAO,Dao-1,AI987963                                 | 1.17E-07 | -4.78907  |
| BM231046  | Dab2ip,AI480459,KIAA1743,mKIAA1743,2310011D08Rik        | 4.21E-08 | -2.81197  |
| BB429377  | Dab1,scm,scr,yot,scrambler,C630028C02Rik                | 4.00E-14 | -8.3556   |
| BQ175902  | D9Ert414e,AU019458                                      | 0        | -25.08558 |
| BB521978  | D930005D10Rik,AI536456                                  | 0.00026  | -5.41455  |
| BC003977  | D8Wsu49e,Cda08,AI314457,2310047C21Rik                   | 0.00004  | -1.84277  |
| BM195829  | D8Ert482e,FLJ00269,MGC100334,mFLJ00269,9830148H23       | 0.00001  | -3.38756  |
| BF468249  | D8Ert4354e,AW208455,9430010M12Rik                       | 0.00013  | -3.63921  |
| U94988    | D8Ert4325e,Nulp1,mKIAA1049,1100001J13Rik,1810041K11Rik  | 0.00007  | -1.64825  |
| BB314814  | D7Ert4715e,AU018661                                     | 1.15E-06 | -1.65479  |
| AV338866  | D6Wsu116e,A130095H06,C530005J20Rik                      | 2.85E-33 | -3.09105  |
| BQ173985  | D630040I23Rik,AW742165                                  | 2.18E-06 | -2.47291  |
| BB498793  | D630023B12Rik,mKIAA1450                                 | 0.0003   | -1.58376  |
| BQ174740  | D630004N19Rik                                           | 0.00093  | -1.84159  |
| BB335455  | D630004K10Rik,AI428890                                  | 2.34E-10 | -2.53066  |
| BB024620  | D5Wsu178e,SELI,                                         | 1.05E-07 | -2.02286  |
| BG073020  | D5Ert4579e,mKIAA0232,9030221A05Rik,A930018H20Rik        | 7.46E-11 | -1.69459  |
| C77487    | D5Ert440e,Hype,MGC117722                                | 0.00015  | -2.80811  |
| AU067727  | D5Buc30e,EST MDB0818                                    | 5.12E-08 | -9.19682  |
| BG066705  | D4Ert4298e                                              | 9.09E-07 | -2.96695  |
| AI587721  | D430034N21                                              | 0.00006  | -3.32221  |
| BB482650  | D430015B01Rik,Precm1,FAM13A1,AI462012                   | 0.00003  | -2.36216  |
| BB238462  | D3Bwg0562e,PRG-1,mKIAA0455,A330086D10                   | 5.96E-08 | -2.52268  |
| BB098407  | D330017J20Rik,FAM40B,mKIAA1170                          | 1.17E-37 | -16.86273 |
| AW551717  | D2Ert4217e,AI663999,1110065P14Rik                       | 3.20E-06 | -5.17833  |
| BC019947  | D2Bwg0891e,                                             | 4.39E-11 | -3.77931  |
| NM_133825 | D1Ert4622e,AI987691,AW047450                            | 0.00012  | -2.67294  |
| BI663634  | D19Wsu12e,Fxna,MGC28180,mKIAA1815,D19Ert4410e           | 4.16E-14 | -1.71778  |
| AW125421  | D16Wsu65e,AW125421                                      | 7.03E-20 | -3.69041  |
| NM_138583 | D16H22S680E,T10                                         | 0.00005  | -10.21204 |
| BC022097  | D15Wsu75e,AI427858,AI850401                             | 5.60E-07 | -2.91506  |
| AV337421  | D13Bwg1146e,R7bp,AI842293,A930030I01Rik                 | 2.24E-25 | -22.55338 |
| BC019973  | D12Ert4771e,2610305M23Rik                               | 6.92E-07 | -1.72087  |
| AV225714  | D11Wsu99e                                               | 2.73E-07 | -2.34309  |
| BC026206  | D11Ert499e,HSPC009,1810033A19Rik                        | 0.00039  | -2.0771   |
| BI156989  | D11Bwg0434e,AA571397,2310033H11Rik,RP23-198E14.6        | 0.0001   | -4.89791  |
| NM_138601 | D10Jhu81e,ES1,C21orf33                                  | 0.00002  | -1.91625  |
| AW538011  | D10Ert438e,MGC7199,AU019165                             | 6.22E-09 | -1.75456  |
| AV347904  | D10Ert4214e,AU043990,AW743335                           | 0.0001   | -2.40053  |
| BB125269  | D10Bwg1379e,mKIAA1244,9630004D11,B930094H20Rik          | 1.08E-15 | -8.93957  |
| BB369191  | D0H4S114,P311,PTZ17,SEZ17,AI325076                      | 2.92E-07 | -1.8635   |
| NM_133969 | Cyp4v3,AU043077,AW111961                                | 0.00054  | -2.38413  |
| NM_010010 | Cyp46a1,Cyp46                                           | 1.01E-06 | -4.16134  |
| AF336850  | Cyp2j9,8430417E17Rik                                    | 2.81E-11 | -11.9273  |
| BF683039  | Cyp2d22,2D22                                            | 1.47E-06 | -5.90031  |
| AK013508  | Cyld,EAC,CDMT,CYLD1                                     | 2.09E-08 | -1.9093   |

|           |                                                         |          |           |
|-----------|---------------------------------------------------------|----------|-----------|
| BM899392  | Cygb,HGb,Staap,3110001K20Rik                            | 2.38E-10 | -6.95081  |
| NM_133769 | Cyfp2,Pir121,AA930218                                   | 6.82E-10 | -6.62657  |
| NM_007808 | Cycs                                                    | 6.32E-25 | -2.2689   |
| NM_025567 | Cyc1,AA408921,2610002H19Rik                             | 0.00002  | -1.57185  |
| BC003436  | Cxx1a,Mart8b,1110012O05Rik                              | 0.00068  | -2.07102  |
| AF252873  | Cxcl14,KS1,Kec,                                         | 0.00066  | -2.03693  |
| AV273804  | Cul3,AI467304,AW146203,mKIAA0617                        | 9.82E-09 | -2.43308  |
| M14222    | Ctsb                                                    | 0.00001  | -2.55537  |
| NM_031249 | Cstf2t,64kDa,C77975,tCstF-64                            | 2.26E-10 | -1.71184  |
| BB248249  | Csdc2,Pippin,AI415250,AI481750                          | 5.12E-07 | -3.10315  |
| AB056479  | Cs,Cis,2610511A05Rik,9030605P22Rik                      | 8.19E-06 | -1.51639  |
| BC010479  | Cryz1,2210407J23Rik,2410006O11Rik                       | 4.22E-08 | -1.88526  |
| NM_009964 | Cryab,Crya2,Crya-2                                      | 1.27E-08 | -4.76718  |
| BG069864  | Cry1,Phl1,AU020726,AU021000                             | 0.00023  | -2.18912  |
| NM_019465 | Crtam                                                   | 0        | -27.15938 |
| AF369656  | Crhr1,Crhr,CRFR1,MGC124237,MGC124240                    | 0.00081  | -2.0994   |
| BC027426  | Creg1,Creg,AA755314                                     | 0.0002   | -1.93976  |
| BG070002  | Creb3,Luman,C80076,LZIP-1,LZIP-2,AU044960,AW538053      | 0.00045  | -1.77988  |
| BE946238  | Cplx2,921-L,AI413745,AW492120                           | 0.0002   | -2.41621  |
| BC014803  | Cplx1,921-S                                             | 0.00004  | -2.78643  |
| NM_026252 | Cpeb4,AI851572,mKIAA1673,4930447D24Rik                  | 8.00E-07 | -6.64059  |
| BB770826  | Cpeb3,KIAA0940,mKIAA0940,4831444O18Rik                  | 0.00006  | -2.23585  |
| BB235708  | Cpeb2,A630055H10Rik                                     | 0.00003  | -3.6977   |
| NM_007755 | Cpeb1,Cpeb,mCPEB,AU024112                               | 4.23E-07 | -2.87103  |
| BC010197  | Cpe,CPH,fat,Cph1,Cph-1,R74677,MGC7101                   | 2.59E-21 | -2.2308   |
| NM_007750 | Cox8a,COX8L                                             | 1.32E-12 | -2.20641  |
| AF037370  | Cox7a1,COX7A,COX7AH,COX7AM                              | 0.00015  | -3.62842  |
| NM_053071 | Cox6c                                                   | 8.94E-19 | -2.06823  |
| NM_025628 | Cox6b1,Cox6b,2010000G05Rik                              | 2.60E-14 | -1.55458  |
| NM_007748 | Cox6a1,VlaL                                             | 1.41E-40 | -3.10749  |
| AA960638  | Cox5b,MGC117683                                         | 3.72E-06 | -1.89599  |
| NM_007747 | Cox5a,CcOX,AA959768                                     | 9.73E-06 | -1.61584  |
| NM_009941 | Cox4i1,Cox4,Cox4a,AL024441                              | 4.69E-25 | -2.4851   |
| BM941165  | Cox17,AI037035                                          | 1.89E-17 | -1.53164  |
| AK008096  | Cox11,2010004I09Rik                                     | 1.11E-06 | -1.6791   |
| BC024686  | Copg,Copg1,AU019265,BC056168,D6Wsu16e,MGC66965,D6Ert71e | 0.00067  | -2.92238  |
| AK020301  | Col4a3bp,CERT,GPBP,AU016711,2810404O15Rik,9230101K08Rik | 8.05E-08 | -2.47225  |
| NM_130457 | Cntnap4,Caspr4,E130114F09Rik                            | 1.80E-14 | -4.10686  |
| NM_017383 | Cntn6,NB-3                                              | 7.82E-18 | -6.92579  |
| AW553181  | Cntn4,Axcam,BIG-2A,9630050B05                           | 3.24E-06 | -6.79679  |
| AK004399  | Cntn1,CNTN,F3cam,AW495098                               | 9.91E-10 | -2.9071   |
| BQ177934  | Cnr1,CB1,CB>1<                                          | 4.87E-36 | -3.4656   |
| M58045    | Cnp1,Cnp,Cnp-1,CNPase                                   | 0.00006  | -5.61391  |
| AK017367  | Cnm4,Acdp4,5430430O18Rik                                | 0.00067  | -2.31933  |
| NM_031396 | Cnm1,Acdp1,AI846314                                     | 2.68E-14 | -8.08548  |
| AV351864  | Cnksr3,Magi1,BC024086,MGC37681,6820402C05               | 7.33E-17 | -3.65741  |
| BB355006  | Cnksr2,Cnk2,Ksr2,mKIAA0902,C030004A01                   | 5.64E-08 | -2.69089  |
| NM_007724 | Cnga2,Cnca,Cncg4,OCNC1                                  | 3.49E-06 | -3.68912  |
| AK013666  | Cmtm5,Cklfs5,1500005P16Rik,2900052H21Rik                | 7.79E-13 | -21.50139 |
| NM_023160 | Cml1,AI266962,1110002I11Rik                             | 5.65E-13 | -9.08316  |
| BB433678  | Clu,Cli,ApoJ,Sgp2,SP-40,Sgp-2,Sugp-2,AI893575,D14Ucla3  | 1.53E-32 | -4.35226  |



|           |                                                        |          |           |
|-----------|--------------------------------------------------------|----------|-----------|
| BM211219  | Cltc,R74732,MGC92975,3110065L21Rik                     | 2.89E-25 | -1.74612  |
| AV341395  | Clstn3,Cs3,CSTN3,Cst-3,mKIAA0726                       | 1.65E-12 | -6.62093  |
| NM_022319 | Clstn2,Cs2,CSTN2                                       | 6.06E-12 | -3.59998  |
| BG065300  | Clstn1,Cst-1,Cstn1,1810034E21Rik                       | 0.0001   | -3.92807  |
| BQ266254  | Clmn,AI428889,KIAA1188,mKIAA1188,9330188N17Rik         | 0.00086  | -3.31429  |
| BQ176424  | Clc6,CLIC1L,AL022908,AW045520,Neuronatin,5730466J16Rik | 2.68E-08 | -5.22757  |
| AW554231  | Cldn12                                                 | 3.62E-08 | -1.63086  |
| NM_008770 | Cldn11,Osp,Otm,Claudin11,Claudin-11                    | 1.09E-15 | -3.29527  |
| BC021770  | Cldn10,D14ErtD728e,6720456I16Rik                       | 7.16E-09 | -3.09304  |
| BI739053  | Clcn3,Clc3                                             | 9.38E-07 | -2.14739  |
| BI412445  | Clcc1,Mclc                                             | 1.65E-07 | -2.13256  |
| BC026688  | Clasp2,mKIAA0627,CLASP2beta,1500004F14Rik              | 0.00016  | -1.88467  |
| NM_009897 | Ckmt1,Mt-CK,mi-CK,ScCKmit,UbCKmit                      | 7.46E-17 | -24.52443 |
| AF086823  | Cit,CRIK,Cit-k,CRIK-SK,citron-N                        | 0.00054  | -2.65633  |
| NM_007702 | Cidea,AW212747                                         | 8.24E-06 | -4.27088  |
| BB549997  | Chst10,ST,Hnk-1st,AI507003,AU041319                    | 5.60E-08 | -1.77689  |
| NM_023850 | Chst1,C6ST,Gst1,GST-1,AW125896,KSGAL6ST,2610008E20Rik  | 0.00057  | -2.25027  |
| BF714580  | Chrb1,Acrb,Achr-2                                      | 8.42E-10 | -6.87104  |
| BC016251  | Chpt1,MGC28885                                         | 9.97E-06 | -2.93618  |
| AK006398  | Chn2,Bch,ARHGAP3,1700026N20Rik                         | 0        | -55.10846 |
| AW121426  | Chn1,ARHGAP2,                                          | 0.00002  | -3.98445  |
| BC011429  | Chmp4b,C76846,2010012F05Rik                            | 1.29E-38 | -2.16817  |
| BB502545  | Chmp1b,2810405I11Rik                                   | 0.00005  | -9.47594  |
| NM_007697 | Chl1,CALL,LICAM2,A530023M13Rik                         | 0.00006  | -2.35953  |
| BB546429  | Chka,Chk,ChoK,EtnK-alpha,Chetk-alpha                   | 9.06E-07 | -1.91913  |
| BG065782  | Chic1,Brx                                              | 3.23E-08 | -2.12933  |
| NM_007694 | Chgb,Scg-1                                             | 0        | -8.92357  |
| NM_007693 | Chga                                                   | 0.00002  | -3.27797  |
| BM196962  | Ches1,                                                 | 4.41E-13 | -1.93041  |
| AV050650  | Chd9,AD013,                                            | 0.00014  | -1.63171  |
| BB529459  | Chd6,5430439G14Rik,6330406J24Rik                       | 3.61E-08 | -1.75058  |
| BI692256  | Chchd7,1810049H20Rik                                   | 2.39E-06 | -5.73578  |
| BI694986  | Chchd2,Etohi6,AL033347,MGC103085                       | 4.06E-14 | -2.14759  |
| AV305616  | Cgrf1,CGR19,1110038G02Rik,1810009H17Rik                | 2.71E-06 | -4.47896  |
| BB409331  | Cgn1,Jacop,AI503810,4933421H10Rik,9930020M10Rik        | 0.00028  | -2.43993  |
| BI905090  | Cerk,AI848610,mKIAA1646,D330016D08Rik                  | 7.76E-07 | -2.05527  |
| BB315525  | Cep76,9630013E05,6230425F05Rik                         | 3.99E-21 | -2.50492  |
| BB182934  | Centd1,ARAP2,Gm148,mKIAA0580                           | 8.13E-21 | -3.35636  |
| BB109647  | Centb2,ACAP2,CNT-B2,mKIAA0041,4832442G16,9530039J15Rik | 2.87E-06 | -1.56641  |
| BB027654  | Cds2,AI854580,D2Wsu127e,5730450N06Rik,5730460C18Rik    | 7.42E-21 | -3.15325  |
| BI152841  | Cds1,AI314024,AW125888,4833409J18Rik                   | 2.15E-09 | -7.54242  |
| AK014670  | Cds1,AI314024,AW125888,4833409J18Rik                   | 9.89E-11 | -15.86177 |
| AI464135  | Cdkl1,4933411O17Rik                                    | 0.0002   | -3.35744  |
| BB311117  | Cdipt,Pis,Pis1,D7Bwg0575e,9530042F15Rik                | 3.03E-28 | -2.0726   |
| NM_007667 | Cdh8,AI851472                                          | 0.00002  | -2.71312  |
| BF472513  | Cdh7,CDH7L1,MGC118246,cadherin 7,9330156F07Rik         | 2.89E-08 | -4.56453  |
| AV327883  | Cdh7,CDH7L1,MGC118246,cadherin 7,9330156F07Rik         | 1.87E-14 | -13.71982 |
| AB019618  | Cdh22                                                  | 0.00008  | -3.39258  |
| NM_007662 | Cdh15,Mcad,Cdh14,AI323380                              | 0.00014  | -3.37714  |
| NM_020006 | Cdc42ep4,CEP4,Borg4,1500041M20Rik                      | 0.00031  | -2.99445  |
| BB012489  | Cdc42ep3,UB1,Cep3,Borg2,AA986861,3200001F04Rik         | 0.00013  | -2.83813  |

|           |                                                             |          |           |
|-----------|-------------------------------------------------------------|----------|-----------|
| BI651416  | Cdc42bpg,BC046418                                           | 5.67E-06 | -2.66431  |
| BM117074  | Cdc42bpa,DMPK-like,A930014J19Rik                            | 1.64E-08 | -3.14305  |
| BF467211  | Cdc42,AI747189,AU018915                                     | 8.48E-43 | -3.99413  |
| AK016651  | Cdc37I1,Harc,Cdc37I,BB159850,2700033A15Rik                  | 0.00013  | -2.33947  |
| AK013228  | Cdc14b,CDC14B3,Cdc14B1,AA472821,2810432N10Rik,A530086E13Rik | 3.14E-07 | -5.37619  |
| BC006901  | Cdadc1,AI449174,AI463398,BB130816,NYD-SP15,2310010M10Rik    | 6.92E-06 | -3.70161  |
| AK018679  | Cd47,IAP,Itgp                                               | 3.67E-11 | -2.79248  |
| BB700884  | Ccr9,Cmkbr10,GPR-9-6                                        | 0.00016  | -4.16271  |
| AV326194  | Ccnh,AI661354,AV102684,AW538719,6330408H09Rik               | 0.00004  | -4.4757   |
| NM_010761 | Ccndbp1,Maid,SECC-8,SSEC-8,AU022347                         | 2.49E-13 | -3.40708  |
| NM_011336 | Ccl27,ALP,                                                  | 5.52E-06 | -3.1525   |
| NM_031161 | Cck                                                         | 3.95E-24 | -6.8517   |
| BQ174391  | Ccdc39,AI447426,D3Erttd789e,4921507O14Rik                   | 0.00002  | -2.14915  |
| AV365721  | Ccdc28b,1110002E08Rik,1810010N17Rik                         | 1.59E-08 | -1.83327  |
| AV024881  | Cbx7,AI851678,D15Erttd417e,1600014J01Rik                    | 6.01E-06 | -3.39782  |
| BC019942  | Cbx6                                                        | 9.72E-07 | -3.09605  |
| NM_007625 | Cbx4,MPC2                                                   | 3.14E-07 | -2.47423  |
| BB800230  | Cbln3                                                       | 1.06E-38 | -19.93648 |
| AA016422  | Cbln1,AI323299                                              | 0        | -9.81615  |
| AV327778  | Cbfa2t1h,ETO,MTG8                                           | 1.25E-14 | -9.4077   |
| NM_009814 | Casq2,ESTM52,AA033488,AW146219,MGC115896                    | 3.09E-09 | -6.00981  |
| BB125515  | Car8,                                                       | 0        | -31.27913 |
| X61397    | Car8,Cals,Carp,Cals1,AW546993                               | 0        | -33.41286 |
| BB193643  | Car7,AV343731                                               | 9.57E-15 | -5.03991  |
| NM_007607 | Car4,AW456718                                               | 0        | -14.20216 |
| NM_009801 | Car2,CAlI,Car-2,Ltw-5,Lvtw-5,AI131712                       | 1.36E-19 | -5.37732  |
| BC019393  | Car11                                                       | 0.0007   | -2.69324  |
| BB124953  | Car10,BB085816,2700029L05Rik                                | 5.77E-07 | -4.52456  |
| AV261931  | Cap2,AV045235,2810452G09Rik                                 | 1.29E-17 | -10.54857 |
| BB657856  | Camta2,mKIAA0909,Kiaa0909-hp,RP23-326P7.7                   | 0.00046  | -3.64642  |
| BB558154  | Camta1,AI316882,KIAA0833,mKIAA0833                          | 0.0009   | -1.94507  |
| AW061083  | Camkk2,AW061083,mKIAA0787,6330570N16Rik                     | 1.04E-21 | -10.77377 |
| NM_018883 | Camkk1,Camkk,AI846603,CaMKKalpha,4732414G09Rik              | 0.00097  | -3.51001  |
| BF660296  | Camk4,CaMKIV,AI666733,CaMKIV/Gr,A430110E23Rik               | 0.00002  | -4.24399  |
| BM227770  | Camk2g,Camkg,5930429P18Rik                                  | 2.49E-06 | -3.43593  |
| BM239047  | Camk2d,KIAA4163,MGC60852,                                   | 1.81E-08 | -3.03638  |
| NM_007595 | Camk2b,Camk2d,MGC90738                                      | 9.79E-17 | -7.20353  |
| BG071931  | Camk1d,CKLiK,A630059D12Rik,E030025C11Rik                    | 1.48E-19 | -8.93329  |
| AF282251  | Caln1,Cabp8,MNCb-0849,9630012C17Rik                         | 2.84E-31 | -11.4564  |
| BB396904  | Calm3,CaMA,R75142                                           | 8.80E-20 | -2.32578  |
| NM_007589 | Calm2,AL024017,1500001E21Rik                                | 2.55E-14 | -3.3385   |
| BB058862  | Calm1,CaM,Calm,AI256814,AI327027,AI461935,AL024000          | 3.31E-23 | -2.14466  |
| BC017646  | Calb2,CR,calretinin                                         | 0        | -41.47829 |
| AW557885  | Calb1,CB,Calb,Calb-1,Brain-2                                | 2.81E-06 | -3.49596  |
| AF000969  | Cadps2,Cpd2,A230044C21Rik                                   | 2.48E-13 | -5.6241   |
| NM_012061 | Cadps,CAPS,CAPS1,AU067781,MGC90712,mKIAA1121                | 1.74E-10 | -2.24941  |
| BB768064  | Cacnb4,Ih,Cchb4,MGC31529,lethargic,3110038O15Rik            | 0        | -17.30972 |
| BB078175  | Cacnb2,Cchb2,AW060387,MGC129334,MGC129335                   | 8.23E-08 | -6.64195  |
| NM_009785 | Cacna2d3,Cacnad3                                            | 6.53E-10 | -3.33315  |
| AF247139  | Cacna2d2,du,td,torpid,Cacna2d,mKIAA0558                     | 4.72E-14 | -12.29737 |
| AW494038  | Cacna1g,a1G,[a]1G,Cav3.1d,alpha-1G,mKIAA1123                | 1.00E-10 | -9.77716  |

|           |                                                             |          |           |
|-----------|-------------------------------------------------------------|----------|-----------|
| AB066608  | Cacna1a,Ja,tg,EA2,                                          | 2.33E-17 | -5.00386  |
| AF328140  | Cables1,ik3-1,Cables                                        | 0.00013  | -2.22058  |
| AK014605  | Cabc1,AI462003,mKIAA0451,4632432J16Rik                      | 0.0003   | -2.5813   |
| BB188557  | C920006C10Rik,C76891,BB071175,                              | 2.71E-07 | -2.5949   |
| BG067071  | C81608                                                      | 0.00002  | -4.80117  |
| C78859    | C78859                                                      | 0.00054  | -2.02669  |
| BG066299  | C78760                                                      | 3.81E-07 | -2.96727  |
| BB428892  | C730029A08Rik                                               | 1.30E-12 | -7.58901  |
| BG918100  | C730026J16                                                  | 7.86E-06 | -2.47414  |
| BB628626  | C630007C17Rik                                               | 0.00085  | -3.11554  |
| AU040402  | C630002B14Rik,AU040402,AW540062                             | 1.06E-11 | -3.02683  |
| BB307004  | C530030P08Rik,C80892                                        | 0.00091  | -7.95782  |
| BB303415  | C330021A05Rik,Rabj,AI639580                                 | 0.00004  | -4.31078  |
| BM899333  | C330013J21Rik                                               | 2.72E-08 | -1.89242  |
| BB430142  | C330002I19Rik,AI194387                                      | 0.00003  | -2.79521  |
| AW611444  | C230096C10Rik,mKIAA0090                                     | 1.80E-08 | -5.35077  |
| BC023470  | C230093N12Rik,Eeig1,AI426465,MGC38572                       | 9.75E-07 | -3.37183  |
| AV317838  | C230082I21Rik,AI852513                                      | 1.21E-10 | -2.10345  |
| AW553275  | C230081A13Rik,                                              | 1.75E-08 | -4.0978   |
| BB529153  | C230009H10Rik                                               | 0.00002  | -2.95431  |
| BM115522  | C1qtnf4,CTRP4,0710001E10Rik,9430004J15Rik                   | 0.00046  | -3.54379  |
| BB804635  | C1ql2,BC040774,MGC49730                                     | 9.00E-06 | -5.17803  |
| NM_021550 | C1galt1c1,C81205,AB030184,1500002I11Rik                     | 1.76E-08 | -2.33018  |
| BM116147  | C130089L09Rik                                               | 3.11E-08 | -6.8389   |
| BB064688  | C130076O07Rik,NrCAM,mKIAA0343,C030017F07Rik                 | 1.64E-09 | -1.5457   |
| AV320517  | C130075A20Rik,AV320517                                      | 2.99E-18 | -10.20533 |
| BG070093  | C130065N10Rik                                               | 2.33E-24 | -3.3512   |
| BB371179  | C130057M05Rik                                               | 6.47E-09 | -2.50272  |
| AU067634  | C130038G02Rik                                               | 9.70E-08 | -6.54593  |
| BB496379  | C130037N17Rik                                               | 2.21E-06 | -4.96723  |
| AV173792  | C130036G08                                                  | 1.93E-16 | -10.60913 |
| BB360125  | C030045D06Rik,AI316880,AI553603                             | 9.09E-17 | -5.32396  |
| BQ174247  | C030032C09Rik,MGC102232                                     | 8.18E-11 | -2.48074  |
| BB275118  | C030019I05Rik,MGC27121,MGC129498,MGC129499,RP23-370F7.2     | 0.0003   | -4.11189  |
| BE980202  | C030009O12Rik,AI835271                                      | 6.89E-10 | -8.77435  |
| AW494399  | C030007I01Rik                                               | 9.85E-13 | -4.66291  |
| AW322026  | Btg1,AW546738                                               | 4.68E-06 | -1.65133  |
| BG073185  | Btbd4,2610019F01Rik,4933406L05Rik                           | 2.89E-08 | -8.99303  |
| AV028445  | Btbd3,MGC25591,mKIAA0952                                    | 8.13E-42 | -4.21109  |
| NM_026495 | Btbd14a,AI448087,0610020I02Rik,C030048H19Rik                | 0.00003  | -2.23837  |
| BQ176524  | Bsn                                                         | 0.00002  | -2.88502  |
| AV327653  | Brunol4,Brul4,CELF4,BRUNOL-4,A230070D14Rik,C130060B05Rik    | 2.45E-13 | -3.61816  |
| BC018324  | Brp44,ESTM43,AA108335,                                      | 1.75E-31 | -2.13283  |
| BC008274  | Brp17,MR-1,Tahccp2,AI854243,                                | 0.00064  | -1.76711  |
| BB412311  | Bpnt1,BPntase                                               | 0.00033  | -1.74412  |
| NM_009760 | Bnip3,Nip3                                                  | 2.64E-14 | -4.37567  |
| AK012810  | Bmyc,AW060705,2900002K07Rik                                 | 9.80E-06 | -2.65671  |
| BB698679  | Bmpr1b,Alk6,ALK-6,Acvrlk6,BMPR-IB,CFK-43a,AI385617,AV355320 | 6.60E-15 | -3.6275   |
| AV032115  | Bmp5,se,AU023399                                            | 7.99E-09 | -7.2209   |
| NM_016916 | Bicap,Bc10,AI462828,MGC102074                               | 1.17E-06 | -2.12046  |
| BF134200  | Birc4,Aipa,Api3,IAP3,MIHA,XIAP,ILP-1,mXIAP                  | 3.00E-13 | -1.74186  |

|           |                                                           |          |           |
|-----------|-----------------------------------------------------------|----------|-----------|
| BB028100  | Bhlhb9,2700087109Rik                                      | 1.35E-10 | -1.96065  |
| NM_011498 | Bhlhb2,CR8,Dec1,Clast5,Sharp2,Stra13,Stra14,C130042M06Rik | 1.20E-18 | -12.53629 |
| NM_009052 | Bex1,Bex4,Rex3,AA407839,AU018692,MGC107097                | 3.36E-13 | -3.4015   |
| AY057913  | Bdnf                                                      | 5.68E-09 | -5.20944  |
| BF322712  | Bdh,AI327223,2310032J20Rik                                | 0.00002  | -1.61239  |
| NM_009745 | Bcl7b                                                     | 2.92E-08 | -3.11829  |
| U41465    | Bcl6,Bcl5                                                 | 9.51E-11 | -6.93387  |
| BB485989  | Bcl2l2,c98,bclw,Bcl-w,Gtrgal2,AW048834,Gtrosa41           | 7.69E-15 | -2.71956  |
| AW047304  | Bckdhh                                                    | 1.70E-06 | -1.50789  |
| AA940256  | Bcas2,C76366,C80030,MGC7712,AI132645,6430539P16Rik        | 0.00038  | -1.85119  |
| AV094648  | Bcap31,Bap31                                              | 1.99E-11 | -1.8287   |
| AV328953  | BC066028                                                  | 1.70E-07 | -5.43858  |
| BQ266886  | BC060631,MGC79206,mKIAA0431                               | 1.33E-06 | -3.39064  |
| BF682848  | BC055107,MGC58343                                         | 4.86E-35 | -18.17097 |
| BB701297  | BC049806,D630010C10                                       | 9.48E-15 | -4.77824  |
| BE136429  | BC044804,---,ESTs,1436355_at                              | 3.40E-08 | -5.53366  |
| BI647183  | BC038286,MGC47289                                         | 0.00018  | -2.34086  |
| AI644670  | BC034068,1110038O08Rik                                    | 1.34E-06 | -7.83606  |
| BC016084  | BC031181                                                  | 1.19E-10 | -1.50983  |
| AV374294  | BC030336,MGC40669                                         | 3.18E-08 | -1.70813  |
| BB085570  | BC027127,MGC38877,9330184N17Rik,RP23-188C13.2             | 2.29E-09 | -4.31275  |
| BM250266  | BC026657,Skt,6620402G01Rik,9430077C05Rik,E330027G05Rik    | 3.25E-07 | -5.93051  |
| AV152395  | BC024659,2900036K02Rik                                    | 8.21E-16 | -2.16108  |
| BM210917  | BC021395,KIAA4077,MGC29396,MGC36325,mKIAA4077             | 0.0008   | -1.73117  |
| BC020184  | BC020184,Reep2,C85440,MGC28827                            | 0.00001  | -3.21164  |
| BC008155  | BC008155,MGC6974                                          | 0.0009   | -1.67863  |
| BC006662  | BC006662,MGC7867                                          | 1.00E-36 | -8.16321  |
| NM_030263 | BC003498,MGC6957,AI661273                                 | 0        | -8.01094  |
| AV260123  | Bbs5,1700049I01Rik,2700023J09Rik                          | 4.46E-06 | -3.01575  |
| C86773    | Bbs4,AW537059,AW742241,D9Ert464e                          | 1.05E-08 | -1.86914  |
| NM_130452 | Bbox1,AI874739                                            | 0.00013  | -3.25687  |
| BB211804  | BB211804                                                  | 0.00007  | -1.97853  |
| BB149026  | BB114106                                                  | 2.33E-17 | -4.89335  |
| BG071718  | Bat5,NG26,Bat-5,MGC19234,D17H6S82E                        | 2.20E-12 | -2.46081  |
| BB429313  | Baiap2,IRSp53,R75030                                      | 8.86E-09 | -4.27205  |
| BE979636  | Bai3,MGC107444,A830096D10Rik                              | 0.00064  | -1.87575  |
| AF200346  | Bace1,C76936                                              | 7.58E-07 | -2.72864  |
| AF371320  | Baalc,2810457D07Rik                                       | 3.20E-09 | -2.39386  |
| BB349472  | B930075F07                                                | 0.00004  | -1.97884  |
| BG143502  | B930013M22Rik,Rreb1,AA414966,1110037N09Rik                | 0.00018  | -3.03676  |
| BG066773  | B4galt6,AA536803,AU022389                                 | 6.72E-08 | -1.98204  |
| AV032053  | B3gnt6,iGAT,iGNT,BETA3GNT1,1500032M01Rik                  | 2.94E-10 | -2.34932  |
| BB430637  | B3galt5,AU045265,b3Galt-V,1190002B21Rik                   | 0.00002  | -3.46756  |
| BB827631  | B230396K10Rik                                             | 6.75E-08 | -2.06479  |
| BG094392  | B230380D07Rik,KIAA1164,mKIAA1164                          | 3.35E-12 | -2.56606  |
| BM941461  | B230343J05Rik                                             | 4.29E-19 | -13.48189 |
| AI841091  | B230343H07Rik                                             | 5.68E-08 | -7.26492  |
| AI506234  | B230343A10Rik                                             | 3.06E-11 | -12.87675 |
| NM_133898 | B230342M21Rik,AI428195                                    | 0.00001  | -2.81801  |
| BE989070  | B230339M05Rik,AI507211,mKIAA1219,9330195P16               | 0.00005  | -1.81558  |
| BM120593  | B230337E12Rik,AI115432                                    | 1.46E-29 | -2.92129  |

|           |                                                                  |          |           |
|-----------|------------------------------------------------------------------|----------|-----------|
| BG063043  | B230333C21Rik,AA407619,C230056F04Rik                             | 5.23E-06 | -2.09255  |
| NM_019833 | B230317C12Rik,PIP49,AB030186,AW209000                            | 4.54E-06 | -4.84717  |
| BB376573  | B230217C12Rik,AI840637                                           | 2.48E-39 | -6.56435  |
| BB306696  | B230209C24Rik                                                    | 2.23E-07 | -2.77732  |
| BG141977  | B230206F22Rik,Ftx,BB219131                                       | 6.36E-06 | -3.64402  |
| AV234069  | B230205M03,MGC130380,MGC130381                                   | 1.68E-12 | -2.71555  |
| BB476773  | B230112C05Rik                                                    | 3.15E-07 | -3.08419  |
| BB303952  | B230107K20Rik,BB129864                                           | 0.00002  | -6.10089  |
| BB431028  | B130017P16Rik,R74726,AI462967                                    | 0.00004  | -4.10093  |
| BB148302  | AW320017                                                         | 9.07E-15 | -3.88148  |
| BF715189  | AW209491                                                         | 1.68E-09 | -2.08675  |
| BC002154  | AW125753,Nse1,2310003N02Rik,4731402F03Rik                        | 6.06E-14 | -5.96809  |
| AW123113  | AW123113                                                         | 4.19E-28 | -14.62979 |
| BG071867  | AW112037                                                         | 1.49E-13 | -3.09264  |
| AV246615  | AW061234                                                         | 3.88E-19 | -8.35065  |
| AW046255  | AW060742                                                         | 0.00095  | -2.8362   |
| BE947974  | AW060394                                                         | 1.52E-06 | -2.70878  |
| BC026642  | AW049765,Stap2                                                   | 0.00084  | -4.82538  |
| BB804965  | AW049604,TAFAS                                                   | 0.00005  | -2.55827  |
| AV350138  | AW046396                                                         | 4.00E-23 | -4.0699   |
| BE995447  | AW045895                                                         | 3.48E-16 | -10.52451 |
| BI649826  | Avpi1,esu,VIT32,mVIT32,AA410041,2310008N12Rik                    | 0.00009  | -5.26678  |
| BB313689  | AV344025,AI852629                                                | 0        | -16.86607 |
| BM213104  | AV009015                                                         | 2.07E-06 | -1.98214  |
| NM_016709 | Auh,C77140,W91705                                                | 1.67E-08 | -6.22612  |
| BG068103  | AU041783,C86904,KIAA1914,MGC28084,mKIAA1914                      | 7.01E-08 | -3.39192  |
| BB079908  | AU040829,AI840762,AW493732,6330543G20                            | 2.81E-21 | -3.87386  |
| BB783173  | Atxn10,E46,Sca10,C77170,AI325283                                 | 1.84E-06 | -3.0038   |
| BG067317  | Atxn1,Atx1,Sca1,C85907,Ataxin-1                                  | 4.58E-13 | -4.49186  |
| AW555641  | Atrn1,Alp,Atrnl,Atrmlp,AI504415,AW555641                         | 0.00064  | -2.16547  |
| AW558010  | Atrn,mg,Mgca,AW558010,mahogany,mKIAA0548                         | 0.00002  | -2.48868  |
| AF011336  | Atp9a,IIa,mKIAA0611                                              | 6.67E-07 | -2.96043  |
| AW125445  | Atp8a1,APLT,Atp3a2,Class I,AI481521,AI853962,AW743152,AW822227,K | 0.00003  | -4.02093  |
| BC020190  | Atp6v1g2,NG38,VAG2,Atp6g2,1500002D01Rik                          | 1.34E-40 | -10.96853 |
| C85064    | Atp6v1e1,E2,P31,Vma4,Atp6e,Atp6e2,Atp6v1e,D6ErtD385e,2410029D23F | 9.32E-09 | -1.86177  |
| AV105788  | Atp6v1d,VATD,Vma8,Atp6m,1110004P10Rik                            | 1.27E-12 | -2.13524  |
| AA987147  | Atp6v1c1,U13839,1700025B18Rik                                    | 0        | -3.18569  |
| NM_007509 | Atp6v1b2,HO57,Atp6b2,R74844,AI194269,AI790362                    | 2.27E-32 | -2.97119  |
| NM_007508 | Atp6v1a,VA68,VPP2,Atp6a1,Atp6a2,AI647066,Atp6v1a1                | 6.53E-23 | -3.10022  |
| AV212820  | Atp6v0c,Atpl,PL16,VATL,Vma3,Atp6c,Atp6l,Atp6c2,Atpl-rs1          | 1.98E-06 | -1.99499  |
| BB560955  | Atp6ap2,M8-9,Atp6ip2,APT6M8-9,ATP6M8-9,5730403E06Rik             | 3.91E-33 | -2.62731  |
| AI316502  | Atp6ap1,16A,CF2,ORF,AC45,C7-1,XAP-3,Atp6s1,VATPS1,Atp6ip1,AI3165 | 1.36E-15 | -2.90347  |
| NM_026536 | Atp5s,ATPW,facyor B,1110015E18Rik                                | 0.00081  | -2.444    |
| NM_013795 | Atp5l,MGC107313,MGC107547,4933437C06Rik                          | 7.03E-09 | -1.50995  |
| AV154755  | Atp5h,0610009D10Rik                                              | 1.66E-42 | -2.04217  |
| AU080319  | Atp5g3,MGC124584,6030447M23                                      | 0        | -2.23592  |
| NM_007506 | Atp5g1                                                           | 3.82E-20 | -1.55564  |
| NM_016774 | Atp5b                                                            | 3.75E-10 | -2.08564  |
| BM213627  | Atp5a1,Atpm,AI035633,AL022851,AL023067,D18ErtD206e               | 2.71E-06 | -1.61337  |
| BM249918  | Atp2c1,HHD,BCPM,SPCA,pmr1,ATP2C1A,AW061228,MGC58010,170012       | 8.70E-06 | -2.40524  |
| BB873703  | Atp2b2,dfw,wms,wri,PMCA2,D6Abb2e                                 | 2.85E-11 | -16.91742 |

|           |                                                                   |          |           |
|-----------|-------------------------------------------------------------------|----------|-----------|
| NM_016745 | Atp2a3,Serca3,SERCA3b                                             | 1.23E-07 | -4.27785  |
| NM_009722 | Atp2a2,SERCA2,KIAA4195,D5Wsu150e,mKIAA4195,9530097L16Rik          | 0        | -9.31421  |
| NM_013415 | Atp1b2,Amog,Atpb-2                                                | 7.36E-08 | -4.38417  |
| AV152334  | Atp1b1,Atpb,Atpb-1                                                | 0        | -22.28287 |
| BC027114  | Atp1a3,Atpa-2,MGC27631,MGC38713,MGC38914,MGC39036                 | 6.11E-09 | -16.37683 |
| BC025618  | Atp1a1,Atpa-1,BC010319,MGC38419                                   | 3.87E-09 | -3.23493  |
| BE687891  | Atp13a4,4832416L12,4631413J11Rik,9330174J19Rik                    | 2.55E-07 | -2.56023  |
| AV378604  | Atp11a,Ih,Atpc1h,AU040868,4930558F19Rik                           | 0.00003  | -1.74528  |
| NM_016864 | Atoh7,Math5                                                       | 7.82E-07 | -8.68515  |
| AW547406  | Ate1,AI225793,AW547406                                            | 5.50E-08 | -1.84516  |
| BQ175377  | Asrg1,ALP,ALP1,AU040643,AW060375,2410004D18Rik                    | 3.70E-06 | -4.38664  |
| BE956483  | Asph,BAH,cl-37,jumbug,Junctin,AI848629,AW261690,AW561901,junctate | 0.00023  | -1.71717  |
| BC024934  | Aspa,Acy2,Acy-2                                                   | 9.07E-08 | -3.41821  |
| BG694892  | Ash1l,Ash1,8030453L17Rik,E430018P19Rik                            | 9.52E-09 | -1.63212  |
| U09362    | Asgr1,Asgr,ASGPR1,Asgr-1                                          | 1.34E-06 | -5.44938  |
| AF398969  | Asb8,AI788835,4930539L19Rik,C430011H06Rik                         | 0.00016  | -1.86909  |
| AF403041  | Asb13,Asb-13,C85285,2210015B19Rik,6430573K02Rik                   | 5.41E-06 | -3.0999   |
| AF403041  | Asb13,Asb-13,C85285,2210015B19Rik,6430573K02Rik                   | 0.00014  | -3.83156  |
| BI106821  | Asah1,NAAA,2210023K21Rik,3830414F09Rik                            | 8.60E-07 | -3.23808  |
| AK004614  | Arb1,AW208571,MGC124269,MGC124270,1200006I17Rik,G430100A01F       | 2.45E-07 | -8.22033  |
| BB159263  | Arpp21                                                            | 6.11E-06 | -4.48967  |
| BG796960  | Arpc5l,ARC16-2,AI852867,AW555592,AW742746,2010015J01Rik           | 6.94E-10 | -1.80222  |
| BC011080  | Arntl,MOP3,Arnt3,Bmal1,BMAL1b,bmal1b'                             | 7.38E-21 | -8.19145  |
| AK004598  | Armcx3,ALEX3,AI450003,1200004E24Rik                               | 0.00011  | -1.79368  |
| BC021410  | Armcx1,ALEX1,3010033I09Rik                                        | 1.52E-12 | -3.0974   |
| BM232782  | Armc8,HSPC056,1200015K23Rik                                       | 0.00003  | -1.57927  |
| AV233429  | Arl8b,gie1,Arl10c,2610313E07Rik,3100002J04Rik                     | 2.05E-09 | -2.16496  |
| NM_022992 | Arl6ip5,Aip-5,AV001879,Gtrap3-18,5930404D22Rik                    | 2.32E-10 | -3.19087  |
| AV334690  | Arl6ip2,Aip-2,AA407293,AV334690,2010110I21Rik                     | 6.20E-19 | -3.91412  |
| BG064956  | Arl5a,Arl5,T25534,AA408731,AW610751,2410015N24Rik,2810410P22Rik   | 2.13E-14 | -1.7577   |
| BI964400  | Arl4c,LAK,Arl7,A630084M22Rik                                      | 2.81E-07 | -7.99932  |
| BI104767  | Arih1,ARI,Ari1,HARI,HHARI,UIP77,UBCH7BP,AU021774                  | 1.63E-08 | -1.63144  |
| BB271482  | Arhgef9,mKIAA0424,A230067K14,9630036L12Rik                        | 4.33E-17 | -8.11355  |
| AF343877  | Arhgef7,PIX,Pak3bp,p85SPR,p85Cool1,betaPix-b,betaPix-c,mKIAA0142  | 1.80E-22 | -4.62764  |
| BC012262  | Arhgef3,C76747,1200004I24Rik,9830169H03Rik                        | 7.80E-09 | -11.87406 |
| AV345051  | Arhgef10,KIAA0294,mKIAA0294,6430549H08Rik                         | 0.00041  | -2.18753  |
| NM_133796 | Arhgdia,Gdi-1,RhoDGI,MGC7904,Rho-GDI,MGC101921,5330430M07Rik      | 2.04E-13 | -3.13067  |
| BM248774  | Arhgap5,p190-B,D2Mgi50                                            | 1.95E-28 | -4.12606  |
| BB127065  | Arhgap26,AI853435,mKIAA0621,1810044B20Rik,2610010G17Rik,493343    | 0        | -29.7131  |
| BE988299  | Arhgap23,4933428G20Rik,A330041B18Rik                              | 1.44E-06 | -6.04671  |
| BM213829  | Arhgap21,AA416458,ARHGAP10,5530401C11Rik                          | 2.17E-09 | -2.04443  |
| BG064038  | Arhgap12,2810011M08Rik                                            | 2.26E-07 | -4.13869  |
| BQ174041  | Arfgef2,BIG2,AI463430,AW493672                                    | 4.71E-06 | -2.44379  |
| BC024935  | Arf3,AI854770,5430400P17Rik                                       | 0.00008  | -2.1442   |
| BG228947  | Araf,A-Raf,Araf1,AW495444,1200013E08Rik                           | 9.36E-11 | -3.79212  |
| BB193413  | Aqp4,MIWC,mMIWC                                                   | 1.26E-06 | -3.05566  |
| NM_007471 | App,Adap,Cvap,Abeta,                                              | 0.00004  | -1.75376  |
| AK013376  | Aplp2,AI790698                                                    | 1.52E-07 | -5.41197  |
| AI848048  | Aplp1                                                             | 3.90E-09 | -3.25374  |
| AV232784  | Aph1b,Aph1c,2310057K14Rik                                         | 1.32E-23 | -1.50442  |
| AF215896  | Apeg1,BPEG,SPEG,AW125581,                                         | 0.00013  | -3.04435  |

|           |                                                        |          |           |
|-----------|--------------------------------------------------------|----------|-----------|
| BG067463  | Apbb2,TR2L,Zfra,Rir1,2310007D03Rik                     | 3.09E-11 | -3.20792  |
| AF206720  | Apbb1,Rir,Fe65                                         | 0.0001   | -1.79688  |
| BQ174146  | Apba1,X11,Mint,Mint1,Lin-10,X11alpha,6430513E09Rik     | 0.00053  | -2.20103  |
| BC027301  | Ap3m2,AP-3B,5830445E16Rik                              | 3.54E-07 | -2.32854  |
| BC027301  | Ap3m2,AP-3B,5830445E16Rik                              | 3.81E-17 | -3.76476  |
| BQ175609  | Ap2a2,L25,Adtab,C78001,AF006990,AW146353,2410074K14Rik | 0.00052  | -2.27318  |
| BC008997  | Anxa7,Anx7,synexin,AI265384,AI316497                   | 0.00001  | -4.64395  |
| D63423    | Anxa5,Anx5,R74653                                      | 9.88E-07 | -2.1139   |
| AK004254  | Ankrd46,AI314978,AI987733,1110054N06Rik                | 0.00002  | -1.62449  |
| BB213578  | Ankrd40,MGC29030,RP23-65114.1,5530600A18Rik            | 2.90E-12 | -4.23409  |
| AV370837  | Ankrd29,Gm95,G630054C21,G630054C21Rik                  | 3.24E-19 | -4.4392   |
| BC010245  | Ankrd25,MGC7734,AI504612,BC010245,MGC12143             | 2.37E-28 | -13.585   |
| AK017778  | Ankrd24,D10Bur2e,4631433D01Rik,5730519E19Rik           | 6.81E-08 | -3.03219  |
| AV104707  | Ankrd13c,AI505652                                      | 3.69E-06 | -1.63996  |
| BB277613  | Ankrd12,GAC-1,ANCO-2,AV347965,mKIAA0874,2900001A12Rik  | 0.00005  | -1.89346  |
| AK003438  | Ankra2,Ankra,AI450635,AU023827,MGC90650,1110004M18Rik  | 8.68E-07 | -2.11033  |
| BC024959  | Ankmy2,ZMYND20,AI035571,MGC18754                       | 0.00011  | -1.84754  |
| BQ174638  | Ank2,Ank-2,AI835472,AW491075                           | 1.79E-40 | -3.87725  |
| NM_031158 | Ank1,nb,Ank-1                                          | 4.86E-17 | -11.89395 |
| NM_020332 | Ank,ank,mKIAA1581,D15ErtD221e                          | 1.15E-21 | -3.62803  |
| NM_007446 | Amy1,Amy-1,C030014B17Rik                               | 0.00002  | -4.14199  |
| BG067039  | Amot,CAG-2,C81439,D0Kist1,mKIAA1071,E230009N18Rik      | 9.97E-14 | -6.64781  |
| NM_011787 | Amfr                                                   | 0.00008  | -1.83661  |
| BM964047  | Als2cr15,1700030B17Rik                                 | 0.00063  | -2.57265  |
| BB128085  | Als2,Alsin,Als2cr6,MGC27807,                           | 4.17E-07 | -3.39655  |
| BC011281  | Alg1,HMT1,HMAT1,MGC18946                               | 0.00078  | -4.03681  |
| BC008184  | Aldoc,Aldo3,Scrg2,AI847350,AU040929                    | 1.27E-16 | -11.0994  |
| BG065457  | Aldoa,Aldo1,Aldo-1,MGC107164                           | 5.46E-22 | -5.78823  |
| BC012407  | Aldh7a1,Atq1,D18Wsu181e                                | 0.00065  | -2.97066  |
| NM_134042 | Aldh6a1,AI314632,MGC37325,1110038I05Rik                | 7.80E-09 | -3.01457  |
| BQ175320  | Aldh5a1,Ahd1,Ahd-1,Ssdh1,6330403E24Rik,D630032B01Rik   | 2.64E-10 | -3.27836  |
| AK007822  | Aldh1l1,Fthfd,1810048F20Rik                            | 5.28E-09 | -3.94515  |
| NM_013467 | Aldh1a1,E1,Ahd2,Ahd-2,Aldh1,Raldh1,Aldh1a2             | 2.81E-26 | -10.65469 |
| BC018236  | Alad,Lv                                                | 4.44E-06 | -3.95606  |
| BI730930  | Akap7                                                  | 0        | -3.49098  |
| AI649048  | Akap2,AKAP-KL,AA959716,AI649048,B230340M18Rik          | 2.27E-09 | -2.33071  |
| AW555068  | Akap11,Gm80,PRKA11,AKAP220,mKIAA0629,6330501D17Rik     | 2.33E-06 | -1.83785  |
| NM_009647 | Ak3l1,Ak3,Ak4,Ak-3,Ak-4,D4ErtD274e                     | 8.34E-21 | -23.3762  |
| BF472675  | AK129341,KIAA1377,mKIAA1377                            | 1.50E-10 | -3.60076  |
| NM_021515 | Ak1,Ak-1,B430205N08Rik                                 | 0.00006  | -2.52664  |
| NM_025446 | Aig1,CGI-103,AV064870,AW413422,1500031O19Rik           | 2.86E-10 | -2.52518  |
| AI854107  | AI854107                                               | 0.00018  | -1.9361   |
| AV220135  | AI850995,9630032O13                                    | 3.41E-16 | -8.94122  |
| AI848122  | AI848122                                               | 0.00006  | -5.54515  |
| BF457720  | AI843190                                               | 3.58E-13 | -14.35822 |
| BB180412  | AI841794,A230084J22                                    | 0.00006  | -6.6883   |
| AI839402  | AI839402,AI848451                                      | 9.61E-08 | -3.54921  |
| BM232314  | AI836758                                               | 1.20E-26 | -13.21216 |
| BB258019  | AI649393                                               | 3.14E-07 | -3.234    |
| AV327193  | AI593442,E130102D23                                    | 0.00005  | -3.5611   |
| AV024458  | AI585793                                               | 0.00011  | -1.55543  |

|           |                                                               |          |           |
|-----------|---------------------------------------------------------------|----------|-----------|
| BB191000  | AI505012                                                      | 3.18E-07 | -3.28593  |
| AV304145  | AI503564                                                      | 0.0007   | -3.9303   |
| BB378591  | AI465420                                                      | 5.34E-30 | -4.42929  |
| BG063189  | AI464131,Gm762,AA408153,AI604836                              | 0.00091  | -4.08584  |
| BB346846  | AI449023,9630010N06                                           | 3.34E-36 | -28.85439 |
| AV039444  | AI413582,AI854251,MGC41609                                    | 0.00063  | -4.3535   |
| BQ175496  | AI115600,AI851943                                             | 5.61E-06 | -1.77702  |
| BE570050  | Ahnak,DY6,AA589382,AV091586,1110004P15Rik,2310047C17Rik       | 0.00007  | -2.67273  |
| BC018218  | Ahcy1,DCAL,Irbt,AA409031,AA414901,Ahcy-rs3,1110034F20Rik      | 6.97E-13 | -2.87406  |
| AK005060  | Agxt2I1,AI195447,1300019H02Rik                                | 1.96E-32 | -7.96206  |
| AK015394  | Agtppb1,pcd,Nna1,nmf243,BB114605,                             | 7.77E-06 | -3.55893  |
| AK018763  | Agt,Aogen,AI265500,Serpina8                                   | 2.67E-06 | -12.97961 |
| AV296997  | Agpat3,AW061257,AW493985,D10Jhu12e                            | 2.85E-06 | -2.40759  |
| BB524140  | Agpat1,1-AGP,1-AGPAT,AW047140                                 | 0.00097  | -3.2368   |
| AA681807  | Agl,C77197,AI850929,1110061O17Rik,9430004C13Rik,9630046L06Rik | 0.00021  | -2.5152   |
| BB391602  | Adrbk2,GRK3,Bark-2,Adrbk-2,AI851927,AW551196,4833444A01Rik    | 0.00054  | -2.2292   |
| BE630294  | Adora1,A1R,A1AR,AI848715,BB176431                             | 1.22E-24 | -6.12965  |
| BM239842  | Add3,R75380,AI463285                                          | 0.00019  | -2.00023  |
| NM_009624 | Adcy9,mKIAA0520                                               | 1.17E-07 | -10.57217 |
| NM_009623 | Adcy8,AC8,AW060868                                            | 8.96E-07 | -4.73728  |
| AV025455  | Adcy2,MGC47193,mKIAA1060                                      | 4.62E-07 | -2.20497  |
| AI848263  | Adcy1,AC1,brl,I-AC,KIAA4070,mKIAA4070,D11Bwg1392e             | 0        | -14.4029  |
| BE993830  | Adcy1                                                         | 2.19E-08 | -6.34273  |
| BB527550  | Adarb2,RED2,Adar3                                             | 2.35E-08 | -1.89079  |
| BI734168  | Adarb1,RED1,ADAR2,                                            | 7.20E-07 | -6.92779  |
| AI838132  | Adam23,MDC3,AW046396                                          | 0.00002  | -3.66447  |
| AV207951  | Acyp1,AI325944,1110039O14Rik                                  | 0.00036  | -3.13242  |
| BB396526  | Acvr1c,ALK7,Alk-7,ACVRLK7,C230097P10                          | 3.17E-11 | -6.17564  |
| BQ043509  | Acvr1b,SKR2,ActRIB,ActR-IB,Acvrlk4,6820432J04                 | 0.0006   | -1.96421  |
| BB125424  | Actr3b,ARP11,Arp3b,AW047569,Arp3beta,MGC91290,9630005C02      | 4.10E-15 | -6.13942  |
| NM_019811 | Acss2,ACAS,Acs1,Acas1,Acas2,AceCS1,1110017C11Rik              | 1.58E-07 | -2.2258   |
| BB312460  | AcsI6,LACS,Faci6,Lacsl,AW050338,                              | 3.52E-19 | -11.81707 |
| AK012088  | AcsI3,ACS3,Faci3,C85929,PRO2194,2610510B12Rik                 | 2.58E-07 | -1.96459  |
| BC006692  | AcsI1,Acs,Acas,FACS,Acas1,Faci2                               | 2.21E-11 | -2.58895  |
| NM_053178 | Acsbg1,BG1,Lpd,R75185,mKIAA0631,E230019G03Rik                 | 1.87E-23 | -10.66962 |
| BB183525  | Acpl2,BB177120,MGC38214,9430094M07Rik,                        | 1.27E-15 | -13.39622 |
| C86680    | Acp2,LAP,Acp-2                                                | 2.08E-06 | -3.10629  |
| AB034914  | Acox1,AOX,AI042784,D130055E20Rik                              | 3.83E-09 | -1.8742   |
| NM_133348 | Acot7,ACT,ACH1,Bach,LACH1,                                    | 0.00001  | -2.21169  |
| AW060409  | Acot11,BFIT,Thea,BFIT1,Them1                                  | 2.44E-12 | -5.95427  |
| AA034553  | Aco2,Aco3,Aco-2,D10Wsu183e                                    | 1.93E-06 | -1.70835  |
| AK005001  | Acbd5,MGC90942,1300014E15Rik                                  | 0.00001  | -1.63846  |
| AI849317  | Acbd4,AI849317,2010009P05Rik,2010015A21Rik                    | 3.56E-12 | -4.78393  |
| BB667786  | Ablim3,AW990719,KIAA0843,MGC69876,D930036B08Rik               | 2.82E-07 | -4.67316  |
| BG065289  | Ablim1,Limab1,abLIM-L,abLIM-M,                                | 0        | -9.06127  |
| BC026627  | Abi3bp,TARSH,AI506287,BG172926,5033411B22Rik,D930038M13Rik    | 0.0007   | -2.99394  |
| AW912678  | Abi1,E3B1,NAP1,MGC6064,Ssh3bp1                                | 5.03E-09 | -1.73145  |
| NM_022419 | Abhd8,AB030191,0910001L24Rik                                  | 0.00003  | -7.66666  |
| BQ176347  | Abhd6,AA673485,AV065425,0610041D24Rik                         | 0.00001  | -3.14514  |
| NM_134130 | Abhd3,LABH3,AA675331                                          | 0        | -10.4505  |
| AY040865  | Abcg4,6430517O04Rik                                           | 3.57E-06 | -2.88318  |



|           |                                                         |          |           |
|-----------|---------------------------------------------------------|----------|-----------|
| BM937648  | Abca5,ABC13,mKIAA1888,B930033A02Rik                     | 0.00019  | -2.52061  |
| BF462185  | Abat,l54,X61497,AI255750,9630038C02Rik                  | 4.23E-31 | -8.0616   |
| NM_007377 | Aatk,AATYK,mKIAA0641                                    | 7.47E-06 | -4.11771  |
| BF687395  | Aass,LKR,LOR,SDH,Lorsdh,LKR/SDH,LOR/SDH                 | 0.00016  | -3.61175  |
| AU067724  | Aak1,C79663,R75501,                                     | 5.72E-31 | -5.80049  |
| AV369935  | Aadacl1,CPO-BP,B230106I24Rik                            | 0.00002  | -2.73038  |
| AV369935  | Aadacl1,CPO-BP,B230106I24Rik                            | 9.60E-07 | -4.13669  |
| BB365879  | AA536749,RIP3,C76423,                                   | 9.00E-06 | -2.52695  |
| BG063210  | AA408213                                                | 5.85E-06 | -3.68332  |
| BB463084  | A930038B10Rik                                           | 0.00007  | -3.31531  |
| AV348640  | A930035E12Rik                                           | 2.89E-07 | -3.11543  |
| BB281971  | A930034L06Rik                                           | 0        | -22.3957  |
| AI426503  | A930031D07Rik,AI850289,A230072B04                       | 4.59E-08 | -7.03264  |
| BI732150  | A930027K05Rik,PLCL4,PLCeta2,Plc-eta2                    | 4.68E-07 | -12.54086 |
| BB279424  | A930017M01Rik,Gm305                                     | 0.00046  | -4.9536   |
| BB193580  | A930009L07Rik                                           | 0.0007   | -2.26048  |
| AV009179  | A930005H10Rik                                           | 0.00035  | -2.63486  |
| BB431047  | A930001N09Rik                                           | 0.00091  | -2.41438  |
| BG073439  | A830073O21Rik                                           | 3.90E-10 | -3.97289  |
| BB024097  | A830055N07Rik                                           | 4.06E-11 | -3.91524  |
| BB269387  | A830039N20Rik                                           | 4.69E-39 | -7.41698  |
| AV327791  | A830010M20Rik,AI849226,mKIAA1107                        | 7.27E-06 | -2.38106  |
| AV025877  | A730098D12Rik,mKIAA1966                                 | 0.00015  | -1.55857  |
| BB253214  | A730056I06Rik,BF642823                                  | 4.85E-09 | -3.76572  |
| BB449560  | A730054J21Rik                                           | 0.00057  | -4.12606  |
| BQ176471  | A730030A06                                              | 0.00076  | -2.12602  |
| BB274531  | A730016F12Rik,KIAA4217,mKIAA4217                        | 0.00004  | -5.8172   |
| BB239253  | A630025C20Rik,Mlr2,mKIAA1795,3110023F06Rik              | 0.00009  | -2.0919   |
| AW208927  | A430105I05Rik,A130052D22                                | 0.00049  | -2.37538  |
| AV328226  | A330104H05Rik,AI854460,KIAA1189,MGC107206,mKIAA1189     | 4.00E-15 | -21.26622 |
| AV376568  | A330068P14Rik,Gm880,Pitpnm3                             | 0.00034  | -4.91304  |
| AV325555  | A330050F15Rik                                           | 5.86E-07 | -6.37834  |
| BF469399  | A330023F24Rik,C030002C11Rik                             | 9.22E-19 | -9.55422  |
| BB185854  | A2m,A2mp                                                | 2.17E-12 | -4.60943  |
| NM_021477 | A2bp1,A2bp,fox-1,Hrnbp1                                 | 2.70E-31 | -4.80923  |
| BM232966  | A230083H22Rik,KIAA0367,mKIAA0367,6330414G02Rik          | 7.08E-26 | -6.77857  |
| AV327597  | A230069A22Rik                                           | 8.23E-07 | -3.19992  |
| AV327739  | A230058F20Rik                                           | 2.97E-07 | -2.22761  |
| BE946786  | A230052E19Rik                                           | 0        | -15.75339 |
| BB267264  | A230046K03Rik,AA589518,mKIAA1033                        | 0.00001  | -1.5706   |
| BQ176089  | A130090K04Rik                                           | 0        | -18.2546  |
| AK002962  | A030009H04Rik,AA589459,AB041807,MNCb-2875,2310043C11Rik | 5.14E-27 | -3.29676  |
| AA673177  | A030007L17Rik,AA673177                                  | 1.50E-19 | -2.62524  |
| BQ176485  | A030001O10Rik                                           | 0        | -9.89977  |
| BM247060  | 9630058J23Rik,MGC31547                                  | 0.00002  | -1.73135  |
| BQ177224  | 9630041G16Rik,AI848669                                  | 1.71E-18 | -3.46575  |
| BB667208  | 9630025C22                                              | 0.00056  | -4.15068  |
| BB127374  | 9630021D06Rik                                           | 1.74E-34 | -3.45839  |
| BB255824  | 9630011N22Rik                                           | 0.00008  | -1.69599  |
| AV299691  | 9630008K15Rik                                           | 0.00002  | -2.03467  |
| BQ174518  | 9630007J19Rik,AI413174,AI661011                         | 1.04E-12 | -2.21092  |

|          |                                                               |          |           |
|----------|---------------------------------------------------------------|----------|-----------|
| BB125017 | 9530056K15Rik                                                 | 3.64E-07 | -2.56069  |
| BB109391 | 9530018I07Rik                                                 | 0.00009  | -2.38738  |
| BB396674 | 9430034D17Rik,C80287,AW124770                                 | 0.00091  | -1.62426  |
| BB527078 | 9330186A19Rik,cg003,                                          | 1.14E-09 | -2.54712  |
| AU067633 | 9330182L06Rik                                                 | 0        | -8.03333  |
| AK020373 | 9330154F10Rik                                                 | 6.11E-08 | -4.15066  |
| AV024939 | 9330140K16Rik,Asef,ARHGEF4                                    | 3.26E-07 | -2.49316  |
| AV024863 | 9330128J19Rik                                                 | 0.00028  | -1.60576  |
| BB317517 | 9330118A15Rik                                                 | 4.66E-33 | -11.09558 |
| AK018685 | 9130422G05Rik,AI450603,AW215585                               | 6.15E-11 | -6.26072  |
| BB424872 | 9130227C08Rik,AI605259,mKIAA0323,6330555F21,2310014G06Rik     | 3.96E-06 | -11.80032 |
| AK008716 | 9130213B05Rik,W91666,2210012L08Rik                            | 2.10E-12 | -6.61142  |
| BC006604 | 9130213B05Rik,W91666,2210012L08Rik                            | 2.46E-22 | -12.96628 |
| BC004630 | 9130023F12Rik,AU018432,AU019184,RP23-452C23.3                 | 7.27E-07 | -1.56061  |
| AI881989 | 9130017A15Rik,TA-PP2C,AA672638,AI848390                       | 9.74E-35 | -2.03326  |
| AK018518 | 9030418K01Rik,AI851938                                        | 7.02E-09 | -3.31405  |
| BQ175107 | 9030409G11Rik,Kazrin,AI256607,AI666764,AW061099,2310007B04Rik | 1.15E-07 | -8.45234  |
| AV369969 | 9030204A07Rik                                                 | 5.57E-07 | -2.14269  |
| AV226672 | 8430421H08Rik                                                 | 2.61E-15 | -3.76199  |
| BM118990 | 8430419L09Rik,KIAA1467,mKIAA1467                              | 0.00038  | -1.56409  |
| AW743000 | 8030451F13Rik                                                 | 0.00002  | -2.71717  |
| BI080487 | 7530403E16Rik,AI849033                                        | 2.09E-13 | -12.92407 |
| AK013740 | 6530401D17Rik,2900062L11Rik                                   | 7.42E-12 | -2.96915  |
| AK018300 | 6430709C05Rik                                                 | 1.40E-45 | -10.73982 |
| BB801576 | 6430704M03Rik                                                 | 1.81E-38 | -15.54295 |
| BB184148 | 6430573F11Rik                                                 | 1.09E-17 | -9.6845   |
| BB821847 | 6430573F11Rik                                                 | 0        | -20.39158 |
| AV342060 | 6430571L13Rik                                                 | 0.00009  | -4.51011  |
| BB520013 | 6430550H21Rik,4933417N17                                      | 0.00013  | -3.2453   |
| BB319392 | 6430548M08Rik,AW049007,mKIAA0513                              | 4.51E-21 | -6.54744  |
| BB317849 | 6430543G08Rik                                                 | 3.41E-20 | -9.51931  |
| BC025646 | 6430514L14Rik                                                 | 4.74E-15 | -4.72026  |
| BE947483 | 6430511F03                                                    | 5.15E-07 | -5.08819  |
| BB296225 | 6430510M02Rik                                                 | 2.85E-09 | -1.97461  |
| AW489260 | 6430502M16Rik,DP58                                            | 1.03E-15 | -7.41665  |
| BE571820 | 6332401O19Rik                                                 | 0.00007  | -2.28845  |
| AK018248 | 6330571D19Rik,Tcba1,AW455467                                  | 0.00013  | -4.33389  |
| BI730484 | 6330563C09Rik                                                 | 5.96E-30 | -11.63158 |
| BB311937 | 6330532G10Rik                                                 | 3.49E-13 | -3.33651  |
| AK018224 | 6330531I01Rik                                                 | 0.00003  | -6.0249   |
| BM116861 | 6330512M04Rik,AI848576                                        | 0.00014  | -5.03187  |
| AK018211 | 6330510M09Rik                                                 | 1.21E-10 | -8.22316  |
| BB332988 | 6330509M05Rik,AI450287                                        | 2.09E-07 | -2.08062  |
| AI845957 | 6330509G02Rik,MGC100296                                       | 1.04E-15 | -6.15487  |
| BM239943 | 6330505F04Rik,D130066O12,4930535D10Rik                        | 1.47E-08 | -1.71575  |
| AW490145 | 6330503C03Rik,AV277466,6530406I18Rik                          | 2.41E-07 | -2.94062  |
| BM242294 | 6330500D04Rik,AI225904,1700108N18Rik,E430013J17Rik            | 0.00006  | -2.59175  |
| BB302103 | 6330442E10Rik,AU019070,9830138K24                             | 0.00057  | -2.00349  |
| BB193360 | 6330442E02Rik,1100001H14Rik                                   | 0.00092  | -2.16407  |
| AV328193 | 6330439K17Rik,AI851115                                        | 2.07E-31 | -9.04563  |
| AK018204 | 6330436F06Rik                                                 | 4.98E-09 | -4.72776  |

|           |                                                       |          |           |
|-----------|-------------------------------------------------------|----------|-----------|
| AI847460  | 6330417K15Rik,AI847460                                | 8.47E-19 | -31.63986 |
| BB013412  | 6330417G02Rik,AI593226,KIAA4091,mKIAA4091             | 9.10E-20 | -11.44327 |
| AK018153  | 6330409N04Rik                                         | 1.01E-22 | -2.4541   |
| BB225226  | 6330405H19                                            | 0.00052  | -4.20286  |
| BB131853  | 6330404F12Rik                                         | 3.73E-18 | -6.4375   |
| AV257745  | 6330403M23Rik                                         | 0        | -2.53645  |
| AV321994  | 6030439D06Rik                                         | 0.00008  | -6.70413  |
| BB023525  | 5930418K15Rik,mKIAA1423                               | 2.57E-09 | -1.82396  |
| AK018065  | 5830490A04Rik                                         | 4.87E-24 | -11.49707 |
| AK018017  | 5830456J23Rik                                         | 6.74E-28 | -4.05305  |
| AK017729  | 5730494N06Rik,AA407821                                | 2.45E-15 | -1.61774  |
| AI790341  | 5730472N09Rik,R74766,C9orf54,AA408683,AI790341        | 0.00047  | -2.07613  |
| AK017688  | 5730469M10Rik,AU040822                                | 5.92E-28 | -8.03213  |
| BB131927  | 5730467H21Rik                                         | 0        | -13.38512 |
| BQ031255  | 5730439E10Rik,AI987948                                | 0.00097  | -3.33912  |
| BC011293  | 5730438N18Rik,MGC4399                                 | 5.73E-24 | -3.02624  |
| BE197771  | 5730411F24Rik                                         | 6.14E-14 | -4.97548  |
| BB298720  | 5730410E15Rik,Golsyn,KIAA1472,mKIAA1472,A830027B17Rik | 1.20E-27 | -8.51717  |
| NM_025670 | 5730403B10Rik,AU018521,AW742692                       | 1.42E-11 | -2.52517  |
| BM246392  | 5430427F17Rik                                         | 0.00058  | -2.96632  |
| BB027596  | 5330438D12Rik                                         | 0.00053  | -2.43771  |
| BB650926  | 5330434G04Rik                                         | 0.00003  | -2.12051  |
| BQ031101  | 5330431N19Rik                                         | 0.00006  | -2.19549  |
| AK019920  | 5330430B06Rik                                         | 4.79E-09 | -6.89648  |
| AK019917  | 5330428N10Rik                                         | 5.24E-18 | -13.25887 |
| BB026256  | 5330423I11Rik                                         | 1.60E-16 | -5.71161  |
| BC006690  | 5330420D20Rik,Ddo,AI467244,5730402C02Rik              | 0.00005  | -3.84313  |
| AK005155  | 5330410G16Rik                                         | 1.32E-17 | -9.62741  |
| BB022219  | 5330409N07Rik                                         | 4.78E-06 | -7.87289  |
| BB085906  | 4933439C20Rik,MGC65558,MGC103350                      | 0.00001  | -2.19839  |
| BB477807  | 4933433P14Rik,FLJ20789                                | 7.75E-20 | -2.53936  |
| BE853276  | 4933431N12Rik,C76116,AI847101,AW490653                | 0.00023  | -2.84414  |
| AK016850  | 4933417O08Rik,AI839934                                | 2.51E-06 | -3.74419  |
| AV280210  | 4933413A10Rik,Gm450                                   | 5.53E-32 | -5.86767  |
| BB306202  | 4933406E20Rik,Ph-4,AI853847,BB128974                  | 2.17E-11 | -3.17499  |
| AV278924  | 4933404M19Rik                                         | 1.78E-08 | -6.78227  |
| AK016577  | 4932702F08Rik,AU043211                                | 0.00009  | -4.7883   |
| BB229589  | 4932443D16Rik,Ppapdc2                                 | 2.14E-06 | -4.68389  |
| AW049283  | 4932442K08Rik,AW049283,                               | 6.61E-06 | -2.52706  |
| NM_027639 | 4931432E15Rik                                         | 0.00038  | -2.28713  |
| AK016375  | 4930589M24Rik,3110012E06Rik,4930438C08Rik             | 0.00029  | -1.94322  |
| BI730651  | 4930544G21Rik,AI852220,mKIAA1678,A930009L15Rik        | 9.54E-10 | -2.97433  |
| AI666321  | 4930543C13Rik                                         | 1.10E-08 | -2.33977  |
| BB085179  | 4930532D21Rik,BB085179                                | 0.00014  | -4.12482  |
| BB559293  | 4930506M07Rik,KIAA1598,mKIAA1598                      | 0.0003   | -2.7965   |
| AW490446  | 4930505D03Rik                                         | 3.61E-06 | -4.90379  |
| BB010153  | 4930504E06Rik,ni,cl-40                                | 1.57E-07 | -1.75746  |
| AK019598  | 4930435F05Rik                                         | 6.22E-06 | -3.27191  |
| BI650220  | 4930422I07Rik                                         | 6.59E-08 | -3.71027  |
| AW539314  | 4930415J21Rik,AA387199,AA939912,AW061076,mKIAA1612    | 1.51E-12 | -2.98012  |
| BB278364  | 4930403J22Rik,5730419O14Rik                           | 1.23E-08 | -2.43386  |

|           |                                                         |          |           |
|-----------|---------------------------------------------------------|----------|-----------|
| BB667775  | 4930402H24Rik,C78926,AI413763,2810487F15Rik             | 3.38E-06 | -2.41818  |
| BB795572  | 4921517B04Rik,C630030B20,1110049N09Rik                  | 0        | -17.65347 |
| AV254721  | 4921513D23Rik                                           | 1.56E-07 | -2.59601  |
| BC006583  | 4921511K06Rik,MGC8047,BC006583                          | 1.74E-09 | -2.01214  |
| BB270852  | 4921509J17Rik,6330544N02Rik                             | 6.19E-16 | -3.5547   |
| BQ176694  | 4921505C17Rik,AVO3,AW492497,6030405M08Rik,D530039E11Rik | 1.05E-06 | -1.78202  |
| NM_133923 | 4833441J24Rik,AI450050                                  | 0.00021  | -3.80649  |
| NM_133797 | 4833439L19Rik,C81457,4930558H15Rik                      | 0.00001  | -1.65233  |
| BB012037  | 4832420M10                                              | 0.00016  | -3.84827  |
| AK019501  | 4632418H02Rik                                           | 4.27E-17 | -3.69047  |
| BG072404  | 4631427C17Rik,AI227036,KIAA0828,mKIAA0828               | 4.97E-32 | -3.62524  |
| BB774721  | 4631416L12Rik,SGEF,AI303572,AW491953,8430436L14Rik      | 7.04E-21 | -3.02567  |
| AK018605  | 4631408O11Rik                                           | 1.88E-07 | -3.62701  |
| AV225683  | 3830431G21Rik                                           | 7.30E-06 | -5.06663  |
| BB709234  | 3732412D22Rik,mKIAA1102                                 | 0.00056  | -3.55465  |
| AV222072  | 3632454L22Rik                                           | 0.00003  | -3.7783   |
| BC023359  | 3632451O06Rik,AU067705                                  | 5.92E-09 | -4.00017  |
| AW123948  | 3110047P20Rik,Hn1-ps2,KIAA1239,mKIAA1239,B830017A01Rik  | 7.22E-19 | -9.03988  |
| BC024807  | 3110005O21Rik                                           | 0.00003  | -2.15589  |
| NM_133725 | 3110001I20Rik,AI504340,C630011I23                       | 3.42E-10 | -1.79855  |
| BC021353  | 3110001A13Rik,AA589595,AA959793,AI132312                | 9.79E-15 | -1.84794  |
| AK013855  | 3000002B06Rik,Gm331,MEGF10                              | 6.20E-16 | -10.87277 |
| AW545056  | 2900097C17Rik,1810005K14Rik,4930563C06Rik               | 1.42E-13 | -2.40949  |
| C77040    | 2900092E17Rik,C77040                                    | 0.00003  | -1.92919  |
| BC003932  | 2900092E17Rik,C77040                                    | 0.00009  | -2.39553  |
| BE956535  | 2900086B20Rik,AI662504                                  | 2.07E-07 | -2.34325  |
| BM117709  | 2900084O13Rik                                           | 6.81E-12 | -2.16562  |
| NM_021403 | 2900083I11Rik,AB041661                                  | 0.00001  | -2.17317  |
| AK013801  | 2900078E11Rik                                           | 8.48E-11 | -3.80846  |
| AK013759  | 2900069M18Rik                                           | 5.86E-29 | -9.44142  |
| AK013751  | 2900064K03Rik                                           | 2.11E-06 | -4.74127  |
| BE915256  | 2900064A13Rik,c11orf3,AI451465                          | 1.88E-09 | -2.26759  |
| BM202541  | 2900054C01Rik                                           | 6.40E-31 | -3.04211  |
| AK013658  | 2900046L07Rik                                           | 0        | -14.0086  |
| BQ176287  | 2900042E01Rik,Hepn1                                     | 1.02E-06 | -2.31741  |
| AK013631  | 2900041A09Rik,Tppp,AI849835                             | 0        | -17.23795 |
| AK013580  | 2900024C23Rik,AI315274                                  | 1.68E-29 | -3.28733  |
| BQ175321  | 2900022I03Rik,AI854032                                  | 7.77E-19 | -2.58184  |
| AW488243  | 2900019G14Rik,AI159670                                  | 2.59E-09 | -1.73243  |
| BE945320  | 2900019E01Rik                                           | 8.48E-28 | -7.59127  |
| AK013549  | 2900018E21Rik                                           | 0.00095  | -1.73228  |
| AK013544  | 2900017F05Rik                                           | 0.0003   | -3.57865  |
| AA216953  | 2900016G23Rik                                           | 7.87E-11 | -5.21345  |
| BB767924  | 2900016B01Rik                                           | 0.00008  | -3.97455  |
| BC022741  | 2900011O08Rik                                           | 4.72E-10 | -3.96899  |
| AK019929  | 2900002G04Rik,1600028E09Rik,5330432J06Rik,C030036K04Rik | 7.61E-17 | -5.59821  |
| BC017533  | 2900001O04Rik,Osrf,AI507072,AW538342,2410099M07Rik      | 0.00075  | -1.59246  |
| AW045947  | 2810457I06Rik,p70,BB125008                              | 2.51E-28 | -3.03466  |
| AK013353  | 2810455D13Rik                                           | 5.06E-06 | -3.27579  |
| BC013800  | 2810432L12Rik,AI835809,9330170P15Rik                    | 2.64E-09 | -1.64076  |
| AK014196  | 2810417M05Rik                                           | 2.32E-09 | -1.97137  |

|           |                                                               |          |           |
|-----------|---------------------------------------------------------------|----------|-----------|
| BC024947  | 2810417J12Rik,AW548203,3010014L17Rik                          | 8.55E-06 | -3.60395  |
| AK013022  | 2810407C02Rik,SeIT,5730408P04Rik                              | 0.00079  | -1.77894  |
| BF320633  | 2810401C16Rik,Aifl,AI840249                                   | 2.69E-31 | -8.30891  |
| BC009123  | 2810051F02Rik,AI597500                                        | 9.21E-06 | -2.43991  |
| BB311645  | 2810011L19Rik                                                 | 5.13E-10 | -8.15573  |
| AV030118  | 2700089E24Rik,AI662692                                        | 6.07E-10 | -2.79914  |
| AV230748  | 2700069A02Rik,AU014748,1010001P15Rik,1700016A15Rik            | 0.00063  | -1.60165  |
| AV368189  | 2700050F09Rik,Pan3,MGC99847,MGC102350                         | 7.22E-06 | -1.52342  |
| AK012087  | 2610510B01Rik,C21orf5,AI503246,mKIAA0933,0610038M01Rik        | 9.45E-09 | -2.75782  |
| AK012069  | 2610507N02Rik                                                 | 0.00006  | -1.78523  |
| AV008714  | 2610318K02Rik                                                 | 0.00069  | -1.91409  |
| AK011909  | 2610207I05Rik,mKIAA0421,C130002K18Rik                         | 0.00085  | -1.52267  |
| BQ174424  | 2610028A01Rik,LPTS,LPTS1,Pinx1,67-11-3,AU024023,2210403I16Rik | 5.61E-22 | -5.18826  |
| AK011449  | 2610018O07Rik                                                 | 9.85E-06 | -3.30682  |
| AK011292  | 2610002J23Rik,AI746380,AW546936,C230060L03Rik                 | 1.64E-09 | -1.94381  |
| AV218922  | 2610002J02Rik                                                 | 6.58E-08 | -2.21456  |
| AV006771  | 2600009E05Rik,AI326138,1110001I20Rik                          | 0.00004  | -1.87749  |
| NM_026527 | 2510006C20Rik,RP23-20N14.6                                    | 0.00015  | -1.84761  |
| BQ174647  | 2510003E04Rik,MGC107132,mKIAA1279,0710007C18Rik               | 1.31E-07 | -1.78861  |
| BQ174216  | 2410080H04Rik,D130061K05                                      | 0.00018  | -1.94632  |
| AK010466  | 2410012C07Rik,VKIND,B830014K08Rik                             | 5.08E-41 | -13.53352 |
| BB115225  | 2410005O16Rik,AI449062,5033415E11Rik,                         | 8.13E-07 | -1.95945  |
| NM_018888 | 2410003P15Rik,Bfzb,Bfzp,mbFZb,2310079L17Rik,3110038N19Rik     | 0.0006   | -3.15273  |
| BB772929  | 2410002O22Rik,AI451892,AU017229,2610524F24Rik                 | 0.00061  | -1.68704  |
| AK010199  | 2310076G13Rik,AI662228                                        | 0.00061  | -1.7098   |
| BB197581  | 2310076G05Rik                                                 | 3.07E-07 | -5.14213  |
| AK010109  | 2310068G24Rik                                                 | 2.54E-06 | -3.43457  |
| BI734389  | 2310067E08Rik,C85344,2210414F18Rik                            | 8.21E-07 | -2.76811  |
| BB379386  | 2310061I04Rik,MGC117734                                       | 1.18E-11 | -2.57558  |
| BQ175646  | 2310058N22Rik                                                 | 0.00095  | -3.03969  |
| BB251327  | 2310057D15Rik,C81437,BB183658                                 | 0.00076  | -1.51454  |
| AW488885  | 2310051E17Rik                                                 | 0.00002  | -2.37297  |
| BC026655  | 2310045A20Rik,AI429585,mKIAA0746                              | 2.04E-13 | -4.12236  |
| BB667295  | 2310044D20Rik                                                 | 1.49E-15 | -2.235    |
| BB772205  | 2310040A07Rik                                                 | 0.00027  | -3.05211  |
| W42220    | 2310016M24Rik,AA959804,MGC106475                              | 2.40E-07 | -1.86361  |
| BG068839  | 2310015A05Rik                                                 | 9.04E-06 | -3.92971  |
| C85100    | 2310009A05Rik                                                 | 0.00001  | -2.1862   |
| BQ176469  | 2310007O11Rik                                                 | 0.00012  | -1.8028   |
| BQ177187  | 2310007F12Rik                                                 | 1.04E-15 | -3.72186  |
| NM_026189 | 2310005P05Rik,AI481005                                        | 0.00006  | -2.66296  |
| AK004527  | 2310005O14Rik,C78387                                          | 0.00064  | -2.24139  |
| AK009163  | 2310005C01Rik                                                 | 0.00012  | -3.07273  |
| NM_025504 | 2310004L02Rik,C030044E10Rik                                   | 3.52E-08 | -5.42537  |
| BM939621  | 2310004I03Rik,AI666706                                        | 1.96E-07 | -3.36073  |
| AK009004  | 2300002D11Rik,MGC57108                                        | 5.33E-17 | -20.10086 |
| BI965477  | 2210407G14Rik                                                 | 1.45E-06 | -7.09423  |
| BG076998  | 2210016L21Rik                                                 | 0.00023  | -1.9174   |
| BC025567  | 2210010N04Rik,mKIAA1358                                       | 0.00001  | -3.48145  |
| BF225441  | 2210010L05Rik,AI836200,AW212394,9630025I22Rik                 | 8.19E-09 | -3.7834   |
| BQ176475  | 2010309L07Rik                                                 | 5.30E-16 | -2.01369  |

|           |                                                         |          |           |
|-----------|---------------------------------------------------------|----------|-----------|
| AK008485  | 2010300C02Rik                                           | 0.0006   | -4.25952  |
| BC024943  | 2010107G23Rik,AA545165                                  | 2.42E-24 | -6.72327  |
| BM247567  | 1810059M14Rik                                           | 5.70E-06 | -3.43997  |
| AK004643  | 1810055E12Rik                                           | 0.00065  | -2.15201  |
| NM_025559 | 1810046J19Rik,AI463380                                  | 2.13E-12 | -1.73206  |
| BC027162  | 1810034M08Rik,DRWMS1,Cgi-121,mDRWMS1,0610033G21Rik      | 3.60E-14 | -1.9915   |
| BC019494  | 1810015C04Rik,AU015349                                  | 3.11E-07 | -1.96716  |
| AK007494  | 1810014F10Rik                                           | 7.33E-10 | -3.92822  |
| AW108427  | 1810012P15Rik                                           | 0.00007  | -2.84815  |
| BM932567  | 1810007M14Rik,C21orf66                                  | 0.00045  | -1.86532  |
| BE994488  | 1810006K23Rik                                           | 0        | -4.56417  |
| BB099635  | 1700101I19Rik                                           | 1.14E-10 | -7.31727  |
| AK006295  | 1700024D23Rik,Trek2,Kcnk10,3010005K24Rik                | 0.00043  | -5.13439  |
| BB778614  | 1700020I14Rik,AI451541,AI585852,AW538376,AW558897,      | 0.00002  | -1.99479  |
| BC019205  | 1700020C11Rik,Mtp18,AV005788,RP23-81P12.9,2610507A21Rik | 1.26E-07 | -3.32185  |
| AK006110  | 1700019D03Rik,AA410151,MGC58779,2410136C24Rik           | 0.00066  | -3.28463  |
| AA215046  | 1700019D03Rik,AA410151,MGC58779,2410136C24Rik           | 1.70E-12 | -4.89451  |
| BB427277  | 1700012H17Rik,AW049855,5031405P22                       | 0.00017  | -3.75814  |
| BB546123  | 1700008O03Rik                                           | 1.84E-24 | -51.52878 |
| BB749015  | 1520402A15Rik                                           | 0.00005  | -3.83344  |
| AK005367  | 1500037O19Rik                                           | 5.43E-29 | -12.9079  |
| NM_025892 | 1500031L02Rik,AI428934,AL022620                         | 1.71E-06 | -1.69632  |
| AK005319  | 1500031I19Rik,AI195361                                  | 0        | -5.49541  |
| BC017627  | 1500031H04Rik,Sizn2                                     | 1.29E-18 | -2.78158  |
| BB131676  | 1500012D20Rik                                           | 1.87E-34 | -3.68495  |
| BM219187  | 1500011H22Rik                                           | 0.00018  | -1.88161  |
| AK018264  | 1500011B03Rik,AI415201,AV141149,AW556386                | 1.22E-07 | -2.44763  |
| AK005178  | 1500009C09Rik                                           | 0.00078  | -5.4715   |
| BQ174720  | 1500005P14Rik,AI844915                                  | 1.57E-08 | -4.19449  |
| BF462791  | 1500004F05Rik                                           | 4.09E-09 | -3.03758  |
| NM_019769 | 1500003O03Rik,Chp,Cahp,Sid470p,AA960066,AI046351        | 0.00005  | -2.52139  |
| BC023032  | 1500001H12Rik,BM88,AI415214                             | 6.55E-12 | -6.5119   |
| AK005046  | 1300018I17Rik,5DOS1,2410004N05Rik                       | 0.00022  | -1.58487  |
| BQ176060  | 1300010F03Rik,AI957255,mKIAA0564,4932416F07Rik          | 0.00003  | -3.11971  |
| BG297038  | 1300007C21Rik,gag protein,murine leukemia retrovirus    | 1.10E-09 | -9.33319  |
| AK004898  | 1300004G08Rik,MGC102273                                 | 3.64E-06 | -1.87878  |
| BB461323  | 1200015N20Rik,KIAA1796,mKIAA1796,C030038O19Rik          | 2.05E-07 | -2.96654  |
| AK004786  | 1200015F23Rik,AI131757                                  | 1.25E-20 | -3.98443  |
| BC019544  | 1200015A19Rik                                           | 8.71E-07 | -1.80024  |
| AK004681  | 1200009O22Rik,AI316813,mKIAA0644                        | 8.85E-11 | -2.83565  |
| BQ175346  | 1200009B18Rik,Ptx1,AA408438,4930572C01Rik               | 9.45E-07 | -4.48829  |
| AV088109  | 1200007B05Rik,AI325987                                  | 1.59E-06 | -1.9361   |
| AV309085  | 1190002N15Rik                                           | 0        | -5.60578  |
| BB408123  | 1190002H23Rik                                           | 0.00004  | -2.0961   |
| BI965045  | 1110062M06Rik,AI225852,AW488865                         | 1.58E-10 | -4.63109  |
| BB667784  | 1110059H15Rik,Znf650,AA409735,AA414972,AI646861         | 7.51E-10 | -2.45648  |
| BM898643  | 1110048D14Rik                                           | 0.00018  | -1.85097  |
| AK004068  | 1110033J19Rik,AA407494,MGC59460                         | 8.58E-07 | -6.1448   |
| AF365876  | 1110032A04Rik,ADMP                                      | 0.00048  | -3.90926  |
| AV217222  | 1110031B06Rik,RP23-378H5.4                              | 0        | -2.32671  |
| AK003981  | 1110030H18Rik,Svop,AI415691                             | 8.89E-07 | -5.75078  |

|           |                                                      |          |           |
|-----------|------------------------------------------------------|----------|-----------|
| BC016234  | 1110020C13Rik,2010324E22Rik                          | 2.05E-08 | -2.882    |
| AK003781  | 1110018J12Rik,AI426045,AW550781                      | 0.00015  | -1.75022  |
| AK003775  | 1110018F16Rik,AI447221                               | 2.93E-18 | -5.9652   |
| BB795266  | 1110012J17Rik,MGC77963,t8219b25,mKIAA0802,D130071O13 | 1.84E-14 | -2.22045  |
| C79326    | 1110008P14Rik,C79326                                 | 0.00078  | -2.70283  |
| BG795169  | 1110007A06Rik,AJ237586,AW125795,MGC59617,MTA.D02.090 | 1.21E-11 | -1.71045  |
| BB117756  | 1110006I15Rik,C77652,AA958958                        | 9.49E-08 | -2.8329   |
| AK003491  | 1110006E14Rik                                        | 3.42E-17 | -6.71328  |
| AK003388  | 1110003O08Rik                                        | 0.0008   | -3.27764  |
| NM_133697 | 1110003E01Rik,MGC7185,1700127H04Rik,5430439C17Rik    | 0.00032  | -1.71522  |
| BM898710  | 1110002L01Rik                                        | 2.07E-08 | -2.52494  |
| BC011343  | 0910001A06Rik,AW122079                               | 5.41E-11 | -1.69537  |
| BB170143  | 0710005M24Rik                                        | 2.48E-22 | -17.27197 |
| AI314055  | 0610039N19Rik,MMT-7,C80029,RetSat                    | 3.31E-12 | -1.7831   |
| BC003333  | 0610033I05Rik                                        | 0.00003  | -2.91692  |
| BC019516  | 0610009K11Rik,AV000801                               | 0.00021  | -2.66731  |
| BE951033  | 0610007A15Rik,AA690150,AU015616,0610030G03Rik,       | 0.00002  | -3.02513  |
